# Supplementary material for: Stop codon context influences genome-wide stimulation of termination codon readthrough by aminoglycosides
Source: eLife. 2020 Jan 23;9:e52611. doi: 10.7554/eLife.52611 (PMC7089771; doi:10.7554/eLife.52611)
Supplement: Figure 3—source data 1. [file elife-52611-fig3-data1.xlsx]

## Sheet: stop_metagene
position	Untreated	G418
-151	0.669892	0.678183
-150	1.58393	1.53996
-149	0.857512	0.785074
-148	0.755687	0.639206
-147	1.64348	1.42898
-146	0.846071	0.659174
-145	0.703873	0.626816
-144	1.58127	1.45012
-143	0.778248	0.730546
-142	0.661055	0.590029
-141	1.59744	1.35122
-140	0.787871	0.709654
-139	0.745738	0.58411
-138	1.53183	1.31003
-137	0.813605	0.764313
-136	0.687973	0.630913
-135	1.61801	1.45496
-134	0.771076	0.725305
-133	0.75142	0.576685
-132	1.63579	1.44491
-131	0.794911	0.702526
-130	0.704525	0.680751
-129	1.64096	1.53479
-128	0.8084	0.757128
-127	0.712214	0.623969
-126	1.68799	1.5087
-125	0.754625	0.789057
-124	0.708306	0.607344
-123	1.60358	1.46142
-122	0.768965	0.80615
-121	0.718132	0.622213
-120	1.65066	1.52699
-119	0.790565	0.806518
-118	0.652417	0.61891
-117	1.54852	1.52072
-116	0.782375	0.789541
-115	0.686996	0.634176
-114	1.52452	1.48519
-113	0.83627	0.747593
-112	0.717789	0.577302
-111	1.49245	1.40726
-110	0.81285	0.820318
-109	0.752569	0.564491
-108	1.53384	1.39508
-107	0.76964	0.740247
-106	0.649593	0.619309
-105	1.55326	1.37946
-104	0.794134	0.69676
-103	0.674305	0.620989
-102	1.58342	1.43853
-101	0.763299	0.754909
-100	0.735709	0.682422
-99	1.60981	1.45323
-98	0.819162	0.722515
-97	0.71252	0.591196
-96	1.69046	1.45074
-95	0.804022	0.76099
-94	0.710863	0.646987
-93	1.67891	1.46513
-92	0.878259	0.811421
-91	0.74698	0.628731
-90	1.48713	1.39874
-89	0.756194	0.733566
-88	0.739366	0.6258
-87	1.61309	1.49849
-86	0.786618	0.701961
-85	0.736669	0.563019
-84	1.60151	1.35602
-83	0.813743	0.700242
-82	0.694998	0.622436
-81	1.51896	1.47924
-80	0.799418	0.756851
-79	0.629675	0.624904
-78	1.6516	1.35248
-77	0.832638	0.69743
-76	0.662024	0.671297
-75	1.66468	1.46442
-74	0.749104	0.66399
-73	0.683148	0.611926
-72	1.57675	1.36807
-71	0.770584	0.706568
-70	0.740486	0.659351
-69	1.45727	1.31344
-68	0.763151	0.740791
-67	0.662821	0.642101
-66	1.59376	1.44739
-65	0.768656	0.707671
-64	0.703751	0.613344
-63	1.56077	1.38262
-62	0.732906	0.710608
-61	0.649988	0.600294
-60	1.69476	1.37193
-59	0.924149	0.84466
-58	0.792706	0.607607
-57	1.62687	1.29901
-56	0.731765	0.741121
-55	0.698211	0.557305
-54	1.48566	1.40142
-53	0.752453	0.756533
-52	0.599433	0.545472
-51	1.59881	1.4442
-50	0.830137	0.631748
-49	0.654469	0.528789
-48	1.51225	1.34829
-47	0.801333	0.691465
-46	0.692636	0.565884
-45	1.51934	1.30906
-44	0.785908	0.72305
-43	0.663839	0.594979
-42	1.5758	1.36813
-41	0.815506	0.745028
-40	0.746018	0.591667
-39	1.58996	1.34646
-38	0.701918	0.667111
-37	0.632903	0.645494
-36	1.51883	1.36788
-35	0.694343	0.630286
-34	0.642541	0.611978
-33	1.60543	1.36757
-32	0.745386	0.70294
-31	0.662044	0.564718
-30	1.54805	1.3119
-29	0.789992	0.708921
-28	0.748684	0.573631
-27	1.62706	1.25941
-26	0.784631	0.730178
-25	0.762586	0.593167
-24	1.70554	1.30313
-23	0.799435	0.696332
-22	0.754936	0.557124
-21	1.74474	1.24973
-20	0.839088	0.635757
-19	0.645543	0.48571
-18	1.64478	1.29618
-17	0.811931	0.629568
-16	0.633014	0.572128
-15	1.49659	1.2452
-14	0.814645	0.609004
-13	0.745946	0.671087
-12	1.64959	1.18495
-11	0.800366	0.617115
-10	0.629765	0.483309
-9	1.7608	1.48291
-8	0.881051	0.831644
-7	0.769426	0.666581
-6	1.66829	1.59569
-5	0.772829	0.763947
-4	0.68489	0.605016
-3	1.69717	1.41543
-2	0.882676	0.812959
-1	1.3072	0.793152
0	7.50642	4.61968
1	5.57337	3.26535
2	1.6882	0.917862
3	0.434928	0.504842
4	0.120767	0.194506
5	0.0515798	0.195925
6	0.0499954	0.367953
7	0.0547309	0.260389
8	0.0626314	0.253919
9	0.0545425	0.438682
10	0.0621586	0.225587
11	0.0467223	0.222386
12	0.0303454	0.535732
13	0.0310641	0.235796
14	0.0421524	0.264143
15	0.047	0.598876
16	0.0315003	0.270286
17	0.0162428	0.190407
18	0.0176612	0.470563
19	0.021735	0.331663
20	0.0375206	0.202849
21	0.0171274	0.415249
22	0.0485426	0.238804
23	0.0202937	0.237694
24	0.0460558	0.418826
25	0.0256545	0.23345
26	0.0242106	0.1956
27	0.0188976	0.490586
28	0.0208702	0.309945
29	0.0310763	0.204288
30	0.0254424	0.415802
31	0.012597	0.223089
32	0.0196729	0.180124
33	0.0128006	0.349934
34	0.0166382	0.197
35	0.0205423	0.188162
36	0.03013	0.435102
37	0.0196466	0.276487
38	0.0183836	0.20198
39	0.032443	0.436527
40	0.0359007	0.221522
41	0.015598	0.177817
42	0.0221093	0.379223
43	0.0150907	0.255674
44	0.0243396	0.189993
45	0.028961	0.343296
46	0.0318151	0.212064
47	0.0333851	0.145997
48	0.0211296	0.320707
49	0.0230956	0.18311
50	0.0281271	0.171809
51	0.033565	0.348848
52	0.026484	0.198625
53	0.0168229	0.221654
54	0.0219699	0.328237
55	0.016053	0.208341
56	0.0152672	0.185481
57	0.0297286	0.316659
58	0.0219075	0.206061
59	0.0231132	0.154488
60	0.0267678	0.300196
61	0.0246245	0.20549
62	0.022753	0.157007
63	0.0239732	0.301057
64	0.023534	0.172294
65	0.00949835	0.129766
66	0.0322793	0.326676
67	0.00709918	0.192065
68	0.0115205	0.145296
69	0.0231465	0.260471
70	0.0321194	0.157941
71	0.0260772	0.14035
72	0.0100556	0.25925
73	0.011631	0.161462
74	0.0135226	0.134263
75	0.0165852	0.273316
76	0.0080415	0.187859
77	0.0179163	0.134964
78	0.0127961	0.23779
79	0.00859337	0.156658
80	0.0172055	0.130471
81	0.0121173	0.272068
82	0.00998121	0.140072
83	0.0303924	0.137011
84	0.00976901	0.294702
85	0.0133329	0.159683
86	0.00954984	0.156449
87	0.00686979	0.234431
88	0.0172097	0.146382
89	0.0226723	0.131726
90	0.00567029	0.213563
91	0.010594	0.160032
92	0.017665	0.1198
93	0.0133883	0.204035
94	0.013573	0.128897
95	0.00610072	0.10615
96	0.0189213	0.174074
97	0.0117195	0.162118
98	0.00697132	0.1157
99	0.00964192	0.204722
100	0.00483838	0.124836
101	0.00798043	0.114636

## Sheet: utr3_stop_metagene
MinusOneFrame	Untr	G418		ZeroFrame	Untr	G418		PlusOneFrame	Untr	G418
-13	13.1885	94.9274		-13	50.3272	146.895		-13	18.8859	155.626
-12	7.91309	74.1404		-12	14.0325	198.308		-12	9.81223	94.3731
-11	8.96816	125.138		-11	6.85801	96.0361		-11	10.7618	71.5074
-10	8.22961	97.5605		-10	6.22496	83.841		-10	6.54148	151.191
-9	7.70207	83.7024		-9	14.7711	202.881		-9	11.5004	115.299
-8	7.91309	144.816		-8	8.96816	112.666		-8	10.5508	102.965
-7	10.6563	90.77		-7	9.60121	109.478		-7	11.5004	163.802
-6	11.0783	74.8333		-6	6.33047	212.582		-6	5.06437	108.093
-5	9.39019	158.951		-5	9.70672	115.299		-5	6.85801	81.208
-4	7.06902	96.4518		-4	9.4957	109.478		-4	14.0325	190.686
-3	8.96816	94.0959		-3	5.48641	200.803		-3	6.85801	99.9163
-2	8.1241	158.397		-2	8.33512	101.856		-2	9.81223	69.1515
-1	8.65164	81.208		-1	11.9224	117.377		-1	9.4957	137.333
0	15.4041	131.097		0	24.1613	563.744		0	25.1109	176.274
1	12.872	232.815		1	19.5189	367.653		1	21.4181	125.415
2	7.80758	103.658		2	9.28469	113.774		2	9.91773	111.834
3	4.32582	51.9676		3	5.69742	73.8632		3	6.22496	61.1139
4	3.48176	110.448		4	9.28469	53.0762		4	5.06437	67.9043
5	5.3809	80.2379		5	6.7525	45.87		5	8.1241	149.112
6	8.01859	66.1027		6	5.27539	73.1703		6	4.32582	78.8521
7	6.33047	147.726		7	8.1241	58.6194		7	5.59191	100.055
8	6.96352	88.5527		8	6.64699	65.5484		8	6.43598	196.922
9	3.69277	66.2413		9	3.48176	77.7435		9	4.74785	86.3355
10	4.1148	124.029		10	4.22031	67.2114		10	7.91309	66.1027
11	4.64234	71.2302		11	5.80293	57.7879		11	4.74785	133.176
12	3.05973	71.0916		12	2.6377	96.4518		12	4.85336	90.9086
13	6.7525	126.108		13	5.06437	59.5895		13	4.64234	67.0728

## Sheet: Count_Table_Key
Figure 3 - source data - 1 Count Table Key
Datasets for deeper ribosome profiling samples in HEK293T cells treated with G418
Column Title	Description
#transcript	Ensembl Transcript ID
chrom	Chromosome location of transcript
featnum	Arbitrary feature number of the transcript
strand	Chromosome strand
mrnalen	Total length of the spliced mRNA
cdslen	Length of coding region (CDS)
utr5len	Length of 5′ untranslated region (5′UTR)
utr3len	Length of 3′ untranslated region (3′UTR)
gene_name	Accepted name for the gene
stopcodon	Identity of the stopcodon: UAA, UAG, or UGA
stop4nt	Identity of the stopcodon including the nucleotide following the stop codon in the +4 position
mrnaCounts	Normalized ribosome counts mapping to the entire mRNA
cdsCounts	Normalized ribosome counts mapping to the CDS
utr5Counts	Normalized ribosome counts mapping to the 5′UTR
utr3Counts	Normalized ribosome counts mapping to the 3′UTR
RAWmrnaCounts	Raw ribosome counts mapping to the entire mRNA
RAWcdsCounts	Raw ribosome counts mapping to the CDS
RAWutr5Counts	Raw ribosome counts mapping to the 5′UTR
RAWutr3Counts	Raw ribosome counts mapping to the 3′UTR
mrnaDensity_rpkm	Density (counts in region divided by length of the region) of ribosome footprints on the mRNA
cdsDensity_rpkm	Density of ribosome footprints in the CDS
utr5Density_rpkm	Density of ribosome footprints in the 5′UTR
utr3Density_rpkm	Density of ribosome footprints in the 3′UTR
utr3_occupancy	Ratio of ribosome density in the entire 3′UTR to ribosome density in the CDS
utr3LenAdj	Adjusted length of 3′UTR including only the region between the NTC and first in-frame 3′TC, including the 3′TC
inframeStopCount	Total number of in-frame stop codons for this transcript
utr3AdjCounts	Normalized ribosome counts mapping to the 3′UTR in the adjusted region between the NTC and 3′TC
utr3LenAdjCalc	The length of the adjusted 3′UTR excluding the first 2 codons following the NTC
utr3AdjDensity_rpkm	Denstiy of ribosome footprints in adjusted 3′UTR region
RRTS	Ribosome Readthrough score (see Figure 2 - figure supplement 2B)

## Sheet: Untr_rep1_countTable
#transcript	chrom	featnum	strand	mrnalen	cdslen	utr5len	utr3len	gene_name	stopcodon	stop4nt	mrnaCounts	cdsCounts	utr5Counts	utr3Counts	RAWmrnaCounts	RAWcdsCounts	RAWutr5Counts	RAWutr3Counts	mrnaDensity_rpkm	cdsDensity_rpkm	utr5Density_rpkm	utr3Density_rpkm	utr3_occupancy	utr3LenAdj	inframeStopCount	utr3AdjCounts	utr3LenAdjCalc	utr3AdjDensity_rpkm	RRTS
ENST00000222803.9	chr7	149	-1	4915	603	170	4142	FKBP14	TAG	TAGA	33.4827	24.972	8.1747	0.335947	299	223	73	3	6.81235	41.413	48.0865	0.0811074	0.0019585	156	71	0.223964	150	1.4931	0.0360538
ENST00000216962.9	chr20	150	1	4071	2499	88	1484	PYGB	TAG	TAGG	70.1009	68.6451	0.559911	0.895858	626	613	5	8	17.2196	27.469	6.36263	0.603678	0.0219767	108	11	0.559911	102	5.48933	0.199837
ENST00000381352.7	chr12	221	1	2275	1146	316	813	RASSF8	TAG	TAGA	5.82308	5.71109	0.111982	0	52	51	1	0	2.55959	4.9835	0.354374	0	0	39	12	0	33	0	0
ENST00000561312.5	chr15	418	-1	2893	672	31	2190	MESD	TGA	TGAT	65.6216	65.0617	0	0.559911	586	581	0	5	22.6829	96.818	0	0.255667	0.0026407	204	28	0.335947	198	1.6967	0.0175246
ENST00000587340.5	chr19	1214	-1	2405	1458	690	257	ZSCAN5A	TGA	TGAT	2.79956	2.79956	0	0	25	25	0	0	1.16406	1.92013	0	0	0	42	4	0	36	0	0
ENST00000025301.4	chr13	113	1	9870	5673	170	4027	AKAP11	TAG	TAGA	93.9531	92.4973	1.2318	0.223964	839	826	11	2	9.51906	16.3048	7.24591	0.0556157	0.003411	27	84	0	21	0	0
ENST00000451882.3	chr18	240	1	644	192	87	365	HSBP1L1	TAA	TAAC	0.447929	0.335947	0	0.111982	4	3	0	1	0.695542	1.74972	0	0.306801	0.175342	48	4	0.111982	42	2.66624	1.52381
ENST00000258106.10	chr2	344	1	2143	840	372	931	EMX1	TAG	TAGG	1.9037	1.34379	0.559911	0	17	12	5	0	0.888333	1.59975	1.50514	0	0	294	11	0	288	0	0
ENST00000599962.1	chr21	163	1	415	348	44	23	H2BFS	TAA	TAAA	490.594	486.339	4.25533	0	4380	4342	38	0	1182.15	1397.53	96.7119	0	0	23	0	0	17	0	0
ENST00000438911.6	chr8	599	-1	1975	1056	128	791	CYHR1	TAG	TAGG	10.5263	8.62263	1.9037	0	94	77	17	0	5.32979	8.16537	14.8726	0	0	429	3	0	423	0	0
ENST00000614428.4	chr17	427	-1	9509	7008	185	2316	ACACA	TAG	TAGG	139.866	136.842	2.91154	0.111982	1249	1222	26	1	14.7088	19.5266	15.738	0.0483516	0.00247619	48	29	0	42	0	0
ENST00000322954.11	chr15	314	-1	6859	4218	145	2496	UACA	TAG	TAGC	66.9654	66.4055	0.335947	0.223964	598	593	3	2	9.76314	15.7434	2.31687	0.0897294	0.00569951	102	57	0.111982	96	1.16648	0.0740936
ENST00000371698.3	chr9	646	1	1237	789	62	386	EGFL7	TGA	TGAC	10.8623	10.5263	0.223964	0.111982	97	94	2	1	8.78115	13.3414	3.61233	0.290109	0.0217451	99	1	0.111982	93	1.20411	0.0902539
ENST00000403263.6	chr2	909	-1	14083	3051	391	10641	INO80D	TGA	TGAG	9.29453	7.61479	1.56775	0.111982	83	68	14	1	0.659982	2.49584	4.00959	0.0105237	0.00421649	186	207	0	180	0	0
ENST00000397666.6	chr16	22	-1	681	585	6	90	METTL26	TAG	TAGG	54.9833	54.7593	0.223964	0	491	489	2	0	80.739	93.6057	37.3274	0	0	78	1	0	72	0	0
ENST00000525680.5	chr11	325	-1	2602	537	223	1842	TP53I11	TAG	TAGT	7.05488	5.15118	1.67973	0.223964	63	46	15	2	2.71133	9.59252	7.53244	0.121588	0.0126753	252	21	0.223964	246	0.910425	0.0949099
ENST00000474627.8	chr17	260	-1	1508	837	149	522	ATPAF2	TGA	TGAG	13.1019	11.3102	1.79172	0	117	101	16	0	8.68828	13.5128	12.0249	0	0	30	8	0	24	0	0
ENST00000335263.9	chr14	503	1	2571	1713	74	784	WDR20	TAG	TAGC	14.7817	13.4379	1.11982	0.223964	132	120	10	2	5.74938	7.84464	15.1327	0.285669	0.0364158	123	9	0.111982	117	0.957113	0.122009
ENST00000484457.5	chr3	134	1	3802	1239	85	2478	FBXL2	TGA	TGAC	8.8466	8.8466	0	0	79	79	0	0	2.32683	7.14011	0	0	0	27	46	0	21	0	0
ENST00000619929.5	chr17	650	-1	6087	2337	99	3651	PLCD3	TGA	TGAG	5.59911	5.59911	0	0	50	50	0	0	0.919848	2.39585	0	0	0	183	35	0	177	0	0
ENST00000371937.8	chr1	602	-1	1782	1023	30	729	ATPAF1	TAG	TAGA	71.5567	71.3327	0.111982	0.111982	639	637	1	1	40.1553	69.7289	3.73274	0.153611	0.00220297	27	16	0	21	0	0
ENST00000288532.11	chr12	841	-1	1461	951	11	499	COQ5	TAA	TAAT	32.0269	31.9149	0	0.111982	286	285	0	1	21.9212	33.5593	0	0.224413	0.00668706	24	16	0.111982	18	6.22124	0.18538
ENST00000373079.3	chrX	407	-1	2594	1488	258	848	NAP1L3	TAA	TAAG	28.5555	26.8757	1.2318	0.447929	255	240	11	4	11.0083	18.0617	4.77444	0.528218	0.0292453	84	14	0.223964	78	2.87134	0.158974
ENST00000389629.8	chr15	101	1	4976	2100	6	2870	RTF1	TGA	TGAG	66.4055	66.2935	0	0.111982	593	592	0	1	13.3452	31.5683	0	0.0390182	0.00123599	24	50	0	18	0	0
ENST00000263093.7	chr19	1277	-1	2247	2040	31	176	SLC27A5	TGA	TGAT	5.0392	5.0392	0	0	45	45	0	0	2.24264	2.4702	0	0	0	162	1	0	156	0	0
ENST00000305784.7	chr2	1145	-1	1006	606	26	374	DTYMK	TGA	TGAC	63.27	62.4861	0.223964	0.559911	565	558	2	5	62.8926	103.112	8.61402	1.49709	0.014519	285	5	0.559911	279	2.00685	0.0194628
ENST00000426362.6	chr16	638	-1	920	417	269	234	TXNL4B	TAG	TAGT	13.8858	12.878	0.783876	0.223964	124	115	7	2	15.0933	30.8824	2.91404	0.957113	0.0309922	24	3	0.111982	18	6.22124	0.201449
ENST00000307767.13	chr17	276	1	1831	585	105	1141	TVP23B	TGA	TGAA	17.5812	17.2453	0.223964	0.111982	157	154	2	1	9.60197	29.4791	2.133	0.098144	0.00332927	75	16	0.111982	69	1.62293	0.0550536
ENST00000421999.8	chr3	473	1	4257	807	112	3338	CMSS1	TAA	TAAG	86.1143	72.2285	13.6618	0.223964	769	645	122	2	20.2289	89.5025	121.981	0.0670954	0.000749648	99	42	0.111982	93	1.20411	0.0134534
ENST00000336498.7	chr4	562	1	3254	2328	233	693	ARHGAP10	TAG	TAGC	11.7581	11.3102	0.447929	0	105	101	4	0	3.61344	4.85834	1.92244	0	0	261	6	0	255	0	0
ENST00000251089.6	chr14	384	-1	5131	1980	107	3044	ANGEL1	TGA	TGAC	46.9206	46.5846	0.111982	0.223964	419	416	1	2	9.14453	23.5276	1.04656	0.0735757	0.00312721	147	36	0.111982	141	0.7942	0.0337561
ENST00000265000.9	chr4	640	1	4204	1941	19	2244	GALNT7	TAG	TAGA	41.4334	41.3214	0	0.111982	370	369	0	1	9.85572	21.2887	0	0.049903	0.0023441	57	47	0	51	0	0
ENST00000320152.11	chr10	103	-1	1894	645	25	1224	PRTFDC1	TAA	TAAA	23.2923	23.2923	0	0	208	208	0	0	12.2979	36.1121	0	0	0	111	27	0	105	0	0
ENST00000371703.7	chr10	393	1	2544	774	265	1505	RPP30	TGA	TGAA	98.8803	98.3204	0.447929	0.111982	883	878	4	1	38.8681	127.029	1.6903	0.0744068	0.000585747	117	29	0.111982	111	1.00885	0.00794188
ENST00000371927.7	chr10	379	1	4139	1353	952	1834	STAMBPL1	TGA	TGAG	5.93506	2.91154	3.02352	0	53	26	27	0	1.43394	2.15191	3.17597	0	0	30	35	0	24	0	0
ENST00000302764.9	chr5	650	-1	7922	441	46	7435	NUDCD2	TAA	TAAC	32.1389	31.467	0.111982	0.559911	287	281	1	5	4.05692	71.3538	2.4344	0.0753075	0.00105541	123	163	0.223964	117	1.91423	0.0268273
ENST00000359644.7	chr3	653	1	3356	2817	123	416	ATP2C1	TAA	TAAG	71.1087	69.7649	1.34379	0	635	623	12	0	21.1885	24.7657	10.9251	0	0	96	9	0	90	0	0
ENST00000355841.7	chr5	727	-1	1667	1341	82	244	PDLIM7	TGA	TGAG	38.8578	34.6025	4.14334	0.111982	347	309	37	1	23.31	25.8035	50.5286	0.458944	0.0177861	36	1	0	30	0	0
ENST00000367888.8	chr1	1366	1	733	357	82	294	MGST3	TAA	TAAA	96.9766	91.2655	5.71109	0	866	815	51	0	132.301	255.646	69.6475	0	0	246	1	0	240	0	0
ENST00000241600.10	chr9	623	1	1413	858	23	532	MRPS2	TGA	TGAT	116.126	115.006	0.335947	0.783876	1037	1027	3	7	82.1837	134.039	14.6064	1.47345	0.0109927	213	4	0.783876	207	3.78684	0.0282517
ENST00000376834.8	chr9	242	-1	4214	1197	46	2971	CARNMT1	TAA	TAAT	41.6574	40.0896	1.45577	0.111982	372	358	13	1	9.88548	33.4918	31.6472	0.0376918	0.0011254	51	73	0	45	0	0
ENST00000596362.1	chr19	915	1	1158	417	130	611	CALM3	TGA	TGAA	160.583	159.687	0	0.895858	1434	1426	0	8	138.672	382.942	0	1.46622	0.00382882	111	4	0.111982	105	1.0665	0.00278501
ENST00000369851.6	chr1	888	1	27128	1032	100	25996	GNAI3	TGA	TGAG	186.786	181.411	4.81524	0.559911	1668	1620	43	5	6.88537	175.786	48.1524	0.0215384	0.000122526	126	452	0.111982	120	0.933185	0.00530864
ENST00000434353.6	chrX	668	1	1479	408	561	510	CXorf40A	TAG	TAGA	24.8601	4.36731	20.4928	0	222	39	183	0	16.8087	10.7042	36.529	0	0	69	3	0	63	0	0
ENST00000374987.4	chrX	278	1	3194	1524	54	1616	APEX2	TGA	TGAA	51.7358	50.8399	0.783876	0.111982	462	454	7	1	16.1978	33.3595	14.5162	0.0692959	0.00207725	72	28	0.111982	66	1.6967	0.050861
ENST00000357495.4	chr13	174	1	1327	930	62	335	HNRNPA1L2	TAA	TAAT	155.431	154.647	0.783876	0	1388	1381	7	0	117.13	166.288	12.6432	0	0	18	10	0	12	0	0
ENST00000318158.11	chr9	184	1	1205	954	49	202	GRHPR	TAG	TAGC	98.7683	97.3126	1.45577	0	882	869	13	0	81.9654	102.005	29.7096	0	0	69	4	0	63	0	0
ENST00000614681.1	chr2	583	1	1302	684	133	485	INSIG2	TGA	TGAA	11.8701	10.6383	1.2318	0	106	95	11	0	9.11683	15.5531	9.26169	0	0	99	12	0	93	0	0
ENST00000328434.8	chr17	592	-1	735	288	17	430	COA3	TAA	TAAT	90.0337	89.4738	0	0.559911	804	799	0	5	122.495	310.673	0	1.30212	0.00419129	66	8	0.335947	60	5.59911	0.0180225
ENST00000225983.10	chr17	624	-1	5281	3339	318	1624	HDAC5	TGA	TGAC	10.4143	8.28669	2.12766	0	93	74	19	0	1.97204	2.48179	6.69076	0	0	60	9	0	54	0	0
ENST00000313552.10	chr2	1146	1	5151	690	20	4441	ING5	TAG	TAGG	19.7089	19.2609	0	0.447929	176	172	0	4	3.82622	27.9144	0	0.100862	0.00361327	36	56	0	30	0	0
ENST00000558966.5	chr15	148	1	1850	1368	119	363	CTDSPL2	TAA	TAAG	35.1624	34.1546	0.895858	0.111982	314	305	8	1	19.0067	24.9668	7.52822	0.308491	0.012356	84	6	0	78	0	0
ENST00000285930.9	chr7	659	-1	1316	918	32	366	AKR1B1	TGA	TGAA	278.724	277.94	0	0.783876	2489	2482	0	7	211.796	302.767	0	2.14174	0.00707388	30	7	0.223964	24	9.33185	0.0308219
ENST00000566625.2	chr16	375	1	2370	126	39	2205	ZNF771	TAG	TAGA	3.24749	2.68757	0.223964	0.335947	29	24	2	3	1.37025	21.33	5.74268	0.152357	0.00714286	81	21	0	75	0	0
ENST00000292577.11	chr19	62	-1	1712	900	428	384	ABHD17A	TAG	TAGC	5.26317	1.45577	3.8074	0	47	13	34	0	3.07428	1.61752	8.89579	0	0	33	4	0	27	0	0
ENST00000321407.3	chr7	611	-1	4083	2295	408	1380	GCC1	TGA	TGAT	19.9328	17.3572	2.46361	0.111982	178	155	22	1	4.88191	7.56307	6.03826	0.0811466	0.0107293	246	25	0	240	0	0
ENST00000413459.7	chr16	103	1	2004	1752	63	189	AMDHD2	TGA	TGAG	8.62263	8.39867	0.223964	0	77	75	2	0	4.30271	4.79376	3.55499	0	0	99	2	0	93	0	0
ENST00000270357.10	chr2	1126	1	5716	2145	97	3474	RNPEPL1	TAG	TAGC	3.02352	2.79956	0.223964	0	27	25	2	0	0.528957	1.30515	2.30891	0	0	72	44	0	66	0	0
ENST00000367287.5	chr1	1553	1	1605	483	18	1104	TIMM17A	TAG	TAGG	167.861	166.07	0.783876	1.00784	1499	1483	7	9	104.587	343.83	43.5487	0.912899	0.00265509	120	23	0.559911	114	4.9115	0.0142847
ENST00000261366.10	chr5	377	1	2845	1728	367	750	LMNB1	TAA	TAAA	411.871	374.917	35.4984	1.45577	3678	3348	317	13	144.77	216.966	96.7258	1.94103	0.00894624	27	16	0.223964	21	10.665	0.0491551
ENST00000628904.2	chr2	701	1	3811	3594	121	96	PKP4	TGA	TGAA	23.8522	23.0683	0.783876	0	213	206	7	0	6.25878	6.41857	6.47831	0	0	36	3	0	30	0	0
ENST00000262613.10	chr17	900	1	1948	1044	213	691	SLC9A3R1	TGA	TGAG	40.2016	33.8186	6.15902	0.223964	359	302	55	2	20.6374	32.3933	28.9156	0.324116	0.0100057	366	3	0.223964	360	0.622124	0.0192053
ENST00000621654.1	chr17	445	-1	3674	1107	920	1647	EPOP	TGA	TGAC	3.24749	1.56775	1.67973	0	29	14	15	0	0.88391	1.41622	1.8258	0	0	57	17	0	51	0	0
ENST00000354429.6	chr17	130	1	1259	918	101	240	ELP5	TGA	TGAC	49.8321	48.0404	1.79172	0	445	429	16	0	39.5807	52.3316	17.7398	0	0	18	3	0	12	0	0
ENST00000396048.6	chr3	207	1	3054	783	431	1840	ZNF501	TAA	TAAA	1.79172	0.895858	0.895858	0	16	8	8	0	0.586678	1.14414	2.07856	0	0	75	35	0	69	0	0
ENST00000575403.5	chr17	283	-1	883	411	328	144	B9D1	TGA	TGAA	21.6126	21.1646	0.335947	0.111982	193	189	3	1	24.4763	51.4955	1.02423	0.777655	0.0151014	27	3	0.111982	21	5.33249	0.103553
ENST00000253496.3	chr5	723	-1	2004	1815	43	146	F12	TGA	TGAT	3.24749	3.02352	0	0.223964	29	27	0	2	1.6205	1.66585	0	1.534	0.920852	33	2	0	27	0	0
ENST00000503569.5	chr4	63	1	3210	2640	161	409	WFS1	TGA	TGAG	39.9777	38.7459	1.2318	0	357	346	11	0	12.4541	14.6765	7.65096	0	0	42	4	0	36	0	0
ENST00000304430.9	chr4	501	-1	1124	918	28	178	NUDT6	TAA	TAAA	4.36731	4.36731	0	0	39	39	0	0	3.88551	4.75742	0	0	0	30	7	0	24	0	0
ENST00000485511.6	chr6	418	1	2928	1776	102	1050	PPP2R5D	TGA	TGAC	95.2969	94.1771	0.671893	0.447929	851	841	6	4	32.5468	53.0276	6.58719	0.426599	0.00804484	225	10	0.447929	219	2.04534	0.0385712
ENST00000480567.5	chr1	1218	-1	850	519	157	174	SSR2	TGA	TGAT	242.442	239.866	1.79172	0.783876	2165	2142	15	7	285.225	462.17	11.4122	4.50503	0.00974758	90	4	0.671893	84	7.99873	0.0173069
ENST00000393860.7	chr17	568	-1	1867	618	450	799	RAB5C	TGA	TGAG	103.808	94.0651	9.51849	0.223964	927	840	85	2	55.6013	152.209	21.1522	0.280306	0.00184159	45	6	0.111982	39	2.87134	0.0188645
ENST00000256441.5	chr5	195	1	1270	279	64	927	MRPS36	TAA	TAAC	67.5253	66.7414	0.559911	0.223964	603	596	5	2	53.1695	239.217	8.74861	0.241601	0.00100997	33	22	0.111982	27	4.14749	0.0173378
ENST00000327532.7	chr3	686	-1	3447	2271	356	820	DZIP1L	TGA	TGAT	4.25533	3.47145	0.783876	0	38	31	7	0	1.2345	1.5286	2.2019	0	0	33	13	0	27	0	0
ENST00000380258.6	chr15	262	-1	866	165	67	634	PCLAF	TAA	TAAC	95.8568	87.2342	8.1747	0.447929	856	779	73	4	110.689	528.692	122.011	0.706513	0.00133634	45	10	0.111982	39	2.87134	0.00543103
ENST00000392876.8	chr12	705	-1	7199	1614	72	5513	NT5DC3	TAG	TAGC	17.8052	17.8052	0	0	159	159	0	0	2.47328	11.0317	0	0	0	36	110	0	30	0	0
ENST00000232888.7	chr3	337	-1	1497	1395	31	71	RRP9	TGA	TGAC	71.2207	70.8848	0.111982	0.223964	636	633	1	2	47.5756	50.8135	3.61233	3.15443	0.0620786	71	0	0.223964	65	3.44561	0.067809
ENST00000428879.5	chr2	676	-1	1681	858	499	324	MMADHC	TAG	TAGC	173.013	166.966	5.82308	0.223964	1545	1491	52	2	102.922	194.599	11.6695	0.691248	0.00355218	39	7	0	33	0	0
ENST00000314128.9	chr12	490	-1	4360	2523	51	1786	STAT2	TAG	TAGG	21.5006	20.9407	0.447929	0.111982	192	187	4	1	4.93133	8.29991	8.78292	0.0627	0.0075543	54	27	0	48	0	0
ENST00000396825.4	chr20	280	-1	4583	756	48	3779	FITM2	TAA	TAAA	16.3494	15.9015	0.223964	0.223964	146	142	2	2	3.5674	21.0337	4.66593	0.0592655	0.00281765	66	69	0.111982	60	1.86637	0.0887324
ENST00000606937.5	chr5	379	-1	562	384	41	137	C5orf63	TGA	TGAA	5.59911	4.47929	1.11982	0	50	40	10	0	9.96283	11.6648	27.3127	0	0	24	3	0	18	0	0
ENST00000265038.9	chr5	170	-1	1972	1158	37	777	ERCC8	TGA	TGAA	13.6618	11.9821	1.67973	0	122	107	15	0	6.92791	10.3472	45.3982	0	0	33	10	0	27	0	0
ENST00000371317.10	chrX	547	1	9532	513	130	8889	MCTS1	TGA	TGAG	205.935	196.865	8.39867	0.671893	1839	1758	75	6	21.6046	383.752	64.6051	0.0755871	0.000196969	27	192	0	21	0	0
ENST00000456936.4	chr5	346	-1	3873	642	238	2993	TMED7	TAA	TAAC	79.5074	59.7985	18.2531	1.45577	710	534	163	13	20.5286	93.1441	76.6937	0.486391	0.00522192	18	69	0	12	0	0
ENST00000322810.8	chr8	573	-1	15204	14022	164	1018	PLEC	TGA	TGAG	59.1266	59.0146	0	0.111982	528	527	0	1	3.88889	4.20872	0	0.110002	0.0261367	114	7	0	108	0	0
ENST00000374198.4	chr9	414	1	2742	1536	96	1110	PRPF4	TAG	TAGA	87.6821	85.6664	1.79172	0.223964	783	765	16	2	31.9774	55.7724	18.6637	0.20177	0.00361774	72	14	0.223964	66	3.3934	0.0608437
ENST00000396056.7	chr3	205	1	2613	1551	224	838	ZNF35	TAA	TAAC	13.9978	9.40651	4.47929	0.111982	125	84	40	1	5.35698	6.0648	19.9968	0.13363	0.0220338	54	15	0	48	0	0
ENST00000219479.7	chr16	15	1	955	531	18	406	NME4	TGA	TGAG	20.9407	20.3808	0	0.559911	187	182	0	5	21.9274	38.3819	0	1.37909	0.0359308	288	3	0.335947	282	1.1913	0.0310381
ENST00000193322.8	chr6	653	-1	4426	972	84	3370	OSTM1	TGA	TGAG	16.7973	16.6854	0	0.111982	150	149	0	1	3.79515	17.166	0	0.0332292	0.00193575	138	66	0.111982	132	0.84835	0.0494204
ENST00000221856.11	chr19	132	1	1788	1458	143	187	FSD1	TAG	TAGG	15.1176	14.8936	0.223964	0	135	133	2	0	8.45504	10.2151	1.56619	0	0	187	0	0	181	0	0
ENST00000631589.1	chr10	90	1	4910	3174	95	1641	MLLT10	TGA	TGAC	14.7817	14.6697	0	0.111982	132	131	0	1	3.01052	4.62183	0	0.0682402	0.0147648	18	32	0	12	0	0
ENST00000247986.2	chr1	251	-1	3924	3057	305	562	KIF17	TGA	TGAG	4.14334	4.14334	0	0	37	37	0	0	1.0559	1.35536	0	0	0	39	4	0	33	0	0
ENST00000373449.6	chr1	428	-1	3541	666	36	2839	AK2	TAG	TAGT	202.128	199.552	2.23964	0.335947	1805	1782	20	3	57.0822	299.628	62.2124	0.118333	0.000394932	51	39	0	45	0	0
ENST00000646620.1	chr15	486	-1	1264	507	406	351	HDDC3	TGA	TGAT	23.4043	22.9564	0	0.447929	209	205	0	4	18.5161	45.2788	0	1.27615	0.0281843	213	5	0.111982	207	0.540977	0.0119477
ENST00000263707.6	chr2	600	-1	9242	1407	87	7748	TFCP2L1	TGA	TGAG	2.01568	1.9037	0	0.111982	18	17	0	1	0.2181	1.35302	0	0.0144531	0.0106821	60	89	0	54	0	0
ENST00000374878.5	chrX	300	-1	2172	1431	395	346	ARHGEF9	TAA	TAAG	2.35163	2.35163	0	0	21	21	0	0	1.0827	1.64335	0	0	0	90	8	0	84	0	0
ENST00000543824.5	chr12	111	1	4247	2982	326	939	PHC1	TAA	TAAG	7.27885	6.9429	0.223964	0.111982	65	62	2	1	1.71388	2.32827	0.687008	0.119257	0.0512213	186	8	0.111982	180	0.622124	0.267204
ENST00000264156.3	chr2	657	-1	3708	2433	72	1203	MCM6	TGA	TGAG	457.783	454.536	2.91154	0.335947	4088	4059	26	3	123.458	186.821	40.438	0.279257	0.00149478	18	25	0	12	0	0
ENST00000522232.2	chr5	616	1	1946	585	19	1342	PPP1R2B	TAG	TAGA	7.27885	7.16686	0	0.111982	65	64	0	1	3.74041	12.251	0	0.0834443	0.0068112	138	31	0.111982	132	0.84835	0.0692472
ENST00000281950.8	chr2	195	1	3660	471	85	3104	GEMIN6	TGA	TGAG	64.6138	49.3842	14.8936	0.335947	577	441	133	3	17.654	104.85	175.219	0.10823	0.00103224	66	52	0.335947	60	5.59911	0.0534014
ENST00000270221.11	chr19	953	1	604	459	68	77	EMP3	TGA	TGAG	8.62263	8.28669	0.111982	0.223964	77	74	1	2	14.2759	18.0538	1.6468	2.90863	0.161109	69	1	0.223964	63	3.55499	0.196911
ENST00000212015.11	chr10	242	1	4062	2211	60	1791	SIRT1	TAG	TAGT	69.9889	69.429	0.223964	0.335947	625	620	2	3	17.2302	31.4016	3.73274	0.187575	0.00597342	129	38	0	123	0	0
ENST00000317506.8	chr16	574	-1	5200	1830	18	3352	RANBP10	TAG	TAGC	16.4614	16.1254	0	0.335947	147	144	0	3	3.16565	8.81172	0	0.100223	0.0113738	249	48	0	243	0	0
ENST00000261700.8	chr14	210	1	6962	702	88	6172	RTRAF	TGA	TGAA	236.73	236.283	0	0.447929	2114	2110	0	4	34.0032	336.585	0	0.0725744	0.00021562	33	129	0	27	0	0
ENST00000249636.10	chr15	302	1	8070	1923	142	6005	PIAS1	TGA	TGAT	70.7728	70.3249	0.223964	0.223964	632	628	2	2	8.76986	36.5704	1.57721	0.0372963	0.00101985	195	125	0.111982	189	0.592499	0.0162016
ENST00000263150.8	chr10	7	1	4417	1452	145	2820	WDR37	TAA	TAAG	7.95074	7.27885	0.671893	0	71	65	6	0	1.80003	5.01298	4.63375	0	0	48	37	0	42	0	0
ENST00000319420.3	chr13	37	-1	2815	855	50	1910	SHISA2	TAA	TAAC	2.68757	2.57559	0.111982	0	24	23	1	0	0.954733	3.01239	2.23964	0	0	30	40	0	24	0	0
ENST00000335255.10	chr17	1055	1	5198	1950	151	3097	FOXK2	TAG	TAGC	26.5398	25.8679	0.223964	0.447929	237	231	2	4	5.10577	13.2656	1.48321	0.144633	0.0109029	153	39	0.111982	147	0.761784	0.0574256
ENST00000505354.2	chr4	623	-1	1823	1629	28	166	GK3P	TAA	TAAA	5.15118	5.15118	0	0	46	46	0	0	2.82566	3.16218	0	0	0	45	5	0	39	0	0
ENST00000372836.4	chr6	415	1	1659	804	365	490	CNPY3	TGA	TGAG	22.3964	19.149	2.91154	0.335947	200	171	26	3	13.5	23.8171	7.97682	0.685606	0.0287863	270	1	0.111982	264	0.424175	0.0178097
ENST00000308521.10	chr22	258	1	4451	1089	91	3271	APOBEC3F	TGA	TGAG	5.71109	4.92722	0.783876	0	51	44	7	0	1.2831	4.52454	8.61402	0	0	36	49	0	30	0	0
ENST00000313143.9	chr3	870	1	5224	2118	253	2853	DVL3	TGA	TGAG	23.0683	21.1646	1.67973	0.223964	206	189	15	2	4.41584	9.99275	6.63926	0.0785014	0.00785584	327	42	0	321	0	0
ENST00000216489.8	chr14	400	-1	2552	1137	13	1402	ALKBH1	TGA	TGAG	24.8601	24.6361	0	0.223964	222	220	0	2	9.7414	21.6676	0	0.159746	0.00737258	192	24	0.223964	186	1.20411	0.0555718
ENST00000323468.10	chr11	918	-1	4208	1491	12	2705	KDELC2	TGA	TGAG	59.3506	59.0146	0.223964	0.111982	530	527	2	1	14.1042	39.5806	18.6637	0.0413982	0.00104592	102	53	0.111982	96	1.16648	0.0294711
ENST00000354371.7	chr2	1100	1	3393	597	70	2726	COPS8	TGA	TGAT	92.9453	91.6015	0.895858	0.447929	830	818	8	4	27.3932	153.436	12.798	0.164317	0.00107092	96	59	0.223964	90	2.48849	0.0162184
ENST00000564845.5	chr16	459	1	11459	8613	296	2550	CHD9	TGA	TGAT	36.2822	35.2744	1.00784	0	324	315	9	0	3.16627	4.09548	3.40487	0	0	27	61	0	21	0	0
ENST00000444614.8	chr13	119	-1	2014	789	303	922	CCDC122	TAA	TAAC	8.1747	7.27885	0.895858	0	73	65	8	0	4.05894	9.22541	2.95663	0	0	63	20	0	57	0	0
ENST00000586895.5	chr19	261	1	387	189	98	100	UBL5	TAG	TAGA	245.913	225.084	17.9172	2.91154	2196	2010	160	26	635.434	1190.92	182.828	29.1154	0.0244478	63	3	1.67973	57	29.469	0.0247447
ENST00000620429.4	chr11	1010	1	2694	1422	1199	73	VPS11	TAG	TAGC	26.4278	12.43	13.9978	0	236	111	125	0	9.80988	8.74123	11.6745	0	0	63	1	0	57	0	0
ENST00000380243.9	chr14	485	-1	16519	1227	242	15050	CCDC85C	TAG	TAGG	16.4614	14.2217	1.11982	1.11982	147	127	10	10	0.996513	11.5907	4.62737	0.0744068	0.00641955	114	190	0.111982	108	1.03687	0.0894576
ENST00000496811.6	chr3	769	-1	6678	2994	65	3619	DHX36	TGA	TGAC	186.338	182.643	0.895858	2.79956	1664	1631	8	25	27.9033	61.003	13.7824	0.773572	0.0126809	108	69	2.46361	102	24.153	0.395932
ENST00000308683.3	chr5	53	-1	1662	1401	129	132	ZNF622	TGA	TGAG	53.0796	51.3999	1.67973	0	474	459	15	0	31.9372	36.688	13.0212	0	0	54	2	0	48	0	0
ENST00000378572.8	chr10	57	1	1625	996	116	513	PRPF18	TGA	TGAG	25.6439	21.9485	3.69541	0	229	196	33	0	15.7809	22.0367	31.857	0	0	21	15	0	15	0	0
ENST00000300289.10	chr15	141	1	3635	1485	96	2054	PDIA3	TAA	TAAA	464.39	459.127	1.34379	3.91938	4147	4100	12	35	127.755	309.177	13.9978	1.90817	0.00617178	129	37	3.91938	123	31.8649	0.103064
ENST00000337080.8	chr19	1210	1	1898	951	261	686	ZNF444	TAG	TAGC	20.7167	15.7895	4.92722	0	185	141	44	0	10.915	16.603	18.8782	0	0	255	7	0	249	0	0
ENST00000342502.6	chr12	675	-1	1600	1020	406	174	IKBIP	TAG	TAGT	32.9228	31.1311	1.79172	0	294	278	16	0	20.5767	30.5207	4.41309	0	0	30	8	0	24	0	0
ENST00000353487.7	chr12	848	-1	4090	1122	485	2483	SPPL3	TGA	TGAT	28.8914	24.4121	4.36731	0.111982	258	218	39	1	7.06392	21.7577	9.00476	0.0450996	0.00207281	36	37	0	30	0	0
ENST00000645843.1	chr4	511	1	5782	1362	312	4108	ABHD18	TAG	TAGT	24.972	20.8287	3.8074	0.335947	223	186	34	3	4.31893	15.2927	12.2032	0.0817787	0.00534755	18	82	0	12	0	0
ENST00000334690.11	chr4	665	1	4478	3369	170	939	TRAPPC11	TGA	TGAT	39.9777	39.5297	0.223964	0.223964	357	353	2	2	8.92757	11.7334	1.31744	0.238514	0.0203278	69	19	0.223964	63	3.55499	0.302981
ENST00000328736.7	chr14	415	-1	6044	3492	199	2353	AL162171.1	TAA	TAAG	4.36731	4.14334	0.223964	0	39	37	2	0	0.722586	1.18652	1.12545	0	0	69	54	0	63	0	0
ENST00000405260.5	chr2	1135	-1	4897	3939	693	265	PASK	TAA	TAAA	29.8993	29.4513	0.447929	0	267	263	4	0	6.10563	7.47685	0.646362	0	0	87	5	0	81	0	0
ENST00000337975.6	chr15	452	-1	3605	1737	164	1704	KLHL25	TGA	TGAG	11.8701	11.0862	0.559911	0.223964	106	99	5	2	3.29268	6.38241	3.41409	0.131435	0.0205933	165	15	0	159	0	0
ENST00000551736.5	chr12	274	1	1639	1350	107	182	IRAK4	TAA	TAAA	9.29453	9.07056	0.111982	0.111982	83	81	1	1	5.67085	6.71893	1.04656	0.615287	0.0915751	24	4	0.111982	18	6.22124	0.925926
ENST00000361891.9	chr1	1156	-1	1807	1140	65	602	ILF2	TGA	TGAC	854.201	845.018	7.83876	1.34379	7628	7546	70	12	472.718	741.244	120.596	2.2322	0.00301143	48	11	0.671893	42	15.9975	0.0215819
ENST00000251108.10	chr13	150	1	3341	1512	107	1722	CDADC1	TAA	TAAG	5.15118	3.35947	1.79172	0	46	30	16	0	1.54181	2.22187	16.745	0	0	54	29	0	48	0	0
ENST00000504548.3	chr8	561	1	5345	1896	63	3386	TIGD5	TGA	TGAC	17.2453	17.1333	0	0.111982	154	153	0	1	3.22643	9.03654	0	0.0330721	0.00365982	942	26	0.111982	936	0.119639	0.0132395
ENST00000589666.6	chr17	936	1	3845	2400	69	1376	UNK	TGA	TGAC	20.3808	19.8209	0.335947	0.223964	182	177	3	2	5.30059	8.25869	4.86879	0.162765	0.0197083	72	15	0.223964	66	3.3934	0.410889
ENST00000372771.5	chr1	503	1	6187	5712	7	468	RLF	TAA	TAAG	59.1266	59.0146	0	0.111982	528	527	0	1	9.55659	10.3317	0	0.239278	0.0231596	18	12	0	12	0	0
ENST00000397382.8	chr14	70	-1	1941	1584	277	80	C14orf93	TAA	TAAA	4.81524	4.14334	0.671893	0	43	37	6	0	2.4808	2.61575	2.42561	0	0	80	0	0	74	0	0
ENST00000482354.5	chrX	57	1	1825	1428	68	329	MOSPD2	TAA	TAAG	16.9093	15.7895	1.11982	0	151	141	10	0	9.26538	11.0571	16.468	0	0	57	10	0	51	0	0
ENST00000332585.11	chr22	163	1	4216	2718	30	1468	OSBP2	TGA	TGAG	6.04704	6.04704	0	0	54	54	0	0	1.43431	2.22481	0	0	0	57	18	0	51	0	0
ENST00000399218.8	chr18	102	-1	6988	2595	50	4343	GAREM1	TAG	TAGC	7.39083	7.27885	0	0.111982	66	65	0	1	1.05765	2.80495	0	0.0257845	0.00919251	51	82	0	45	0	0
ENST00000379485.1	chr13	106	-1	5133	1992	229	2912	KBTBD6	TGA	TGAA	60.3584	56.887	3.24749	0.223964	539	508	29	2	11.7589	28.5577	14.1812	0.0769109	0.00269317	30	66	0.223964	24	9.33185	0.326772
ENST00000442287.6	chr15	463	-1	4442	3687	330	425	POLG	TAG	TAGC	53.3036	46.0247	7.27885	0	476	411	65	0	11.9999	12.483	22.0571	0	0	105	5	0	99	0	0
ENST00000257215.10	chr11	501	1	5754	3096	152	2506	DAGLA	TAG	TAGC	3.58343	3.24749	0	0.335947	32	29	0	3	0.622772	1.04893	0	0.134057	0.127804	87	20	0	81	0	0
ENST00000378887.3	chr19	640	1	1072	315	70	687	SDHAF1	TGA	TGAC	8.62263	7.83876	0.335947	0.447929	77	70	3	4	8.0435	24.8849	4.79924	0.652007	0.0262009	90	7	0.223964	84	2.66624	0.107143
ENST00000521367.5	chr5	521	1	1735	666	745	324	RELL2	TGA	TGAT	3.1355	0.783876	2.35163	0	28	7	21	0	1.80721	1.17699	3.15655	0	0	81	2	0	75	0	0
ENST00000302190.9	chr8	402	1	3262	573	453	2236	SDC2	TAA	TAAA	65.8456	53.0796	12.318	0.447929	588	474	110	4	20.1856	92.6345	27.1922	0.200326	0.00216254	51	47	0.111982	45	2.48849	0.0268636
ENST00000506380.5	chr4	55	1	753	525	186	42	NSG1	TAG	TAGC	2.91154	2.79956	0.111982	0	26	25	1	0	3.86658	5.33249	0.602055	0	0	42	0	0	36	0	0
ENST00000397411.6	chr11	39	1	980	684	115	181	TSPAN4	TAG	TAGG	7.05488	6.71893	0.335947	0	63	60	3	0	7.19886	9.823	2.92128	0	0	165	1	0	159	0	0
ENST00000393114.7	chr7	665	-1	1437	441	176	820	CYREN	TAG	TAGG	41.0975	19.2609	18.701	3.1355	367	172	167	28	28.5995	43.6756	106.256	3.82378	0.0875496	192	7	1.67973	186	9.03083	0.20677
ENST00000428984.6	chr15	16	-1	2941	2526	390	25	UBE3A	TAA	TAAA	63.4939	61.9262	1.56775	0	567	553	14	0	21.5892	24.5155	4.01988	0	0	25	0	0	19	0	0
ENST00000330062.7	chr15	474	-1	2649	1326	108	1215	IDH2	TAG	TAGG	36.7302	36.7302	0	0	328	328	0	0	13.8657	27.7	0	0	0	126	17	0	120	0	0
ENST00000356853.9	chr2	990	-1	2049	867	128	1054	NHEJ1	TAA	TAAT	32.9228	31.243	1.56775	0.111982	294	279	14	1	16.0677	36.0358	12.2481	0.106245	0.00294832	96	13	0	90	0	0
ENST00000369902.7	chr10	518	1	4956	1422	160	3374	SUFU	TAG	TAGC	33.0348	31.803	1.11982	0.111982	295	284	10	1	6.66561	22.3649	6.99889	0.0331898	0.00148401	108	30	0	102	0	0
ENST00000357122.8	chr17	747	-1	4716	3891	203	622	SPAG9	TGA	TGAG	132.923	132.027	0.895858	0	1187	1179	8	0	28.1855	33.9314	4.41309	0	0	75	13	0	69	0	0
ENST00000266039.7	chr3	321	-1	5431	3405	168	1858	CACNA2D2	TGA	TGAG	10.3024	10.1904	0.111982	0	92	91	1	0	1.89696	2.99277	0.666561	0	0	132	16	0	126	0	0
ENST00000375442.8	chrX	260	1	2770	2049	126	595	TSPYL2	TAA	TAAG	19.9328	19.3729	0.559911	0	178	173	5	0	7.19597	9.45482	4.44374	0	0	345	1	0	339	0	0
ENST00000407249.7	chr1	41	-1	2632	2355	106	171	CDK11B	TGA	TGAA	42.5533	41.4334	1.00784	0.111982	380	370	9	1	16.1676	17.5938	9.50793	0.654867	0.0372214	138	1	0	132	0	0
ENST00000370398.5	chr6	541	1	6300	2766	103	3431	KCNQ5	TAA	TAAG	6.9429	6.83092	0.111982	0	62	61	1	0	1.10205	2.4696	1.08721	0	0	57	67	0	51	0	0
ENST00000336990.8	chr18	46	1	1670	486	74	1110	PRELID3A	TAA	TAAG	0.895858	0.895858	0	0	8	8	0	0	0.536442	1.84333	0	0	0	27	9	0	21	0	0
ENST00000269260.7	chr17	70	1	1733	1197	84	452	ARRB2	TAG	TAGG	36.1703	35.2744	0.783876	0.111982	323	315	7	1	20.8715	29.469	9.33185	0.247748	0.00840708	45	4	0	39	0	0
ENST00000279907.12	chr12	679	-1	5153	4362	233	558	UHRF1BP1L	TAG	TAGC	37.4021	34.9385	2.35163	0.111982	334	312	21	1	7.25831	8.00973	10.0928	0.200685	0.0250551	30	12	0	24	0	0
ENST00000341653.6	chr14	292	-1	285	219	42	24	MAX	TAA	TAAT	20.8287	19.149	1.67973	0	186	171	15	0	73.0832	87.4382	39.9937	0	0	18	1	0	12	0	0
ENST00000398073.7	chr12	539	-1	4740	783	288	3669	CTDSP2	TAG	TAGC	14.1098	6.83092	6.15902	1.11982	126	61	55	10	2.97674	8.72403	21.3855	0.305212	0.0349852	72	47	0	66	0	0
ENST00000395284.7	chr10	227	1	1868	861	136	871	CDK1	TAG	TAGC	325.98	296.753	27.4357	1.79172	2911	2650	245	16	174.508	344.661	201.733	2.05708	0.00596842	126	21	1.2318	120	10.265	0.029783
ENST00000280020.10	chr18	122	1	4808	1701	6	3101	KIAA1328	TGA	TGAC	7.95074	7.83876	0	0.111982	71	70	0	1	1.65365	4.60832	0	0.0361117	0.00783618	21	37	0	15	0	0
ENST00000370630.6	chr1	769	-1	6526	1125	19	5382	CTBS	TGA	TGAA	8.62263	8.51065	0	0.111982	77	76	0	1	1.32127	7.56502	0	0.0208068	0.0027504	120	131	0	114	0	0
ENST00000555761.5	chr14	401	-1	1810	1683	23	104	SNW1	TGA	TGAA	159.911	159.799	0.111982	0	1428	1427	1	0	88.3484	94.9487	4.86879	0	0	104	0	0	98	0	0
ENST00000406438.5	chr17	269	1	8252	2781	491	4980	SMCR8	TGA	TGAG	25.308	21.9485	2.57559	0.783876	226	196	23	7	3.06689	7.89231	5.2456	0.157405	0.0199441	21	75	0.111982	15	7.46548	0.945918
ENST00000298295.3	chr10	163	-1	2075	606	212	1257	DEPP1	TGA	TGAC	3.58343	2.79956	0.783876	0	32	25	7	0	1.72696	4.61973	3.69753	0	0	159	21	0	153	0	0
ENST00000333602.12	chr3	947	-1	4431	3084	537	810	TNK2	TGA	TGAG	5.59911	4.70325	0.895858	0	50	42	8	0	1.26362	1.52505	1.66826	0	0	45	6	0	39	0	0
ENST00000258975.7	chr17	825	1	1401	861	183	357	TACO1	TAA	TAAC	52.8556	44.9049	7.95074	0	472	401	71	0	37.7271	52.1543	43.4467	0	0	33	8	0	27	0	0
ENST00000535621.6	chr16	219	1	2003	1464	182	357	PDXDC1	TGA	TGAG	40.2016	39.3058	0.895858	0	359	351	8	0	20.0707	26.8482	4.9223	0	0	81	5	0	75	0	0
ENST00000219302.7	chr16	64	-1	1024	477	190	357	NME3	TAG	TAGC	27.6596	26.4278	0.671893	0.559911	247	236	6	5	27.0113	55.4042	3.53628	1.56838	0.0283079	342	1	0.559911	336	1.6664	0.0300772
ENST00000406652.5	chr2	208	1	5439	1581	316	3542	MTA3	TGA	TGAG	43.2251	38.8578	4.36731	0	386	347	39	0	7.94726	24.578	13.8206	0	0	51	26	0	45	0	0
ENST00000298289.6	chr14	187	-1	701	288	154	259	RPL36AL	TAA	TAAA	159.575	118.813	40.2016	0.559911	1425	1061	359	5	227.639	412.546	261.05	2.16182	0.00524019	42	2	0.559911	36	15.5531	0.0377003
ENST00000450142.7	chr12	616	-1	5575	3060	160	2355	PPP1R12A	TAA	TAAA	91.1536	90.3697	0.335947	0.447929	814	807	3	4	16.3504	29.5326	2.09967	0.190203	0.00644046	213	50	0.223964	207	1.08195	0.036636
ENST00000358697.5	chrX	298	-1	4068	2367	394	1307	ZXDA	TGA	TGAA	5.48713	5.48713	0	0	49	49	0	0	1.34885	2.31818	0	0	0	33	28	0	27	0	0
ENST00000222122.9	chr19	965	-1	2184	945	438	801	DBP	TGA	TGAG	15.0056	5.71109	9.29453	0	134	51	83	0	6.87071	6.04349	21.2204	0	0	267	12	0	261	0	0
ENST00000425146.5	chrX	500	1	2432	1602	365	465	PAK3	TAA	TAAG	1.67973	1.67973	0	0	15	15	0	0	0.69068	1.04852	0	0	0	36	8	0	30	0	0
ENST00000262306.11	chr16	109	-1	537	453	32	52	ELOB	TAA	TAAT	184.995	184.995	0	0	1652	1652	0	0	344.497	408.377	0	0	0	39	2	0	33	0	0
ENST00000617859.4	chr10	629	-1	4497	1227	304	2966	IKZF5	TGA	TGAT	10.0784	5.71109	4.25533	0.111982	90	51	38	1	2.24114	4.65452	13.9978	0.0377553	0.00811154	195	57	0	189	0	0
ENST00000320776.4	chr4	70	1	1572	621	149	802	BLOC1S4	TGA	TGAC	17.8052	17.0213	0.559911	0.223964	159	152	5	2	11.3264	27.4095	3.75779	0.279257	0.0101883	60	21	0.223964	54	4.14749	0.151316
ENST00000405938.5	chr22	116	-1	2851	2481	349	21	TFIP11	TGA	TGAA	76.1479	66.4055	9.74246	0	680	593	87	0	26.7092	26.7656	27.9153	0	0	21	0	0	15	0	0
ENST00000268182.10	chr15	480	1	7160	4941	94	2125	IQGAP1	TAA	TAAT	133.931	132.811	1.11982	0	1196	1186	10	0	18.7054	26.8794	11.913	0	0	186	33	0	180	0	0
ENST00000265334.9	chr5	422	-1	2177	1746	210	221	CDKL3	TAG	TAGT	2.01568	1.79172	0.223964	0	18	16	2	0	0.925898	1.02618	1.0665	0	0	69	7	0	63	0	0
ENST00000376945.3	chr13	219	-1	2733	798	344	1591	SOX21	TGA	TGAC	7.61479	4.47929	2.91154	0.223964	68	40	26	2	2.78624	5.61315	8.46377	0.14077	0.0250786	138	21	0.223964	132	1.6967	0.302273
ENST00000260753.8	chr10	391	1	6261	5310	66	885	KIF20B	TAA	TAAA	138.746	137.402	1.11982	0.223964	1239	1227	10	2	22.1604	25.8761	16.967	0.253067	0.00977995	21	16	0.111982	15	7.46548	0.288509
ENST00000429967.3	chrX	574	-1	3179	201	320	2658	APLN	TGA	TGAA	0.671893	0.559911	0.111982	0	6	5	1	0	0.211354	2.78563	0.349945	0	0	57	30	0	51	0	0
ENST00000357460.6	chr14	80	-1	4926	1620	159	3147	HOMEZ	TGA	TGAG	25.7559	24.8601	0.671893	0.223964	230	222	6	2	5.22857	15.3457	4.22575	0.0711676	0.00463762	51	69	0.111982	45	2.48849	0.162162
ENST00000376300.7	chr2	582	-1	6788	1863	69	4856	CCDC93	TGA	TGAA	28.1075	27.7716	0.111982	0.223964	251	248	1	2	4.14077	14.9069	1.62293	0.0461212	0.00309394	30	89	0	24	0	0
ENST00000309733.6	chr4	460	1	8799	366	121	8312	FAM241A	TAA	TAAA	7.61479	7.16686	0.223964	0.223964	68	64	2	2	0.865416	19.5816	1.85095	0.0269447	0.00137602	51	162	0.223964	45	4.97699	0.254167
ENST00000251810.7	chr8	430	-1	4886	1023	238	3625	RRM2B	TAA	TAAA	36.1703	35.9463	0.111982	0.111982	323	321	1	1	7.40284	35.1381	0.470514	0.0308917	0.000879149	27	67	0	21	0	0
ENST00000396813.5	chr14	114	-1	1425	909	263	253	DHRS1	TAA	TAAC	7.50281	7.05488	0.447929	0	67	63	4	0	5.26513	7.76115	1.70315	0	0	105	5	0	99	0	0
ENST00000243189.12	chr1	304	-1	1380	840	206	334	RSRP1	TAA	TAAA	7.39083	6.15902	0.895858	0.335947	66	55	8	3	5.35567	7.33217	4.34883	1.00583	0.13718	21	4	0	15	0	0
ENST00000298282.14	chr11	1083	1	3597	1386	220	1991	PKNOX2	TAG	TAGT	8.95858	5.37515	3.58343	0	80	48	32	0	2.49057	3.87817	16.2883	0	0	30	24	0	24	0	0
ENST00000243644.9	chr19	1090	-1	2310	1566	236	508	ZNF350	TAG	TAGG	3.91938	3.02352	0.895858	0	35	27	8	0	1.6967	1.93073	3.79601	0	0	48	11	0	42	0	0
ENST00000272418.7	chr2	444	-1	3253	1260	11	1982	MRPS5	TAA	TAAC	78.7235	78.7235	0	0	703	703	0	0	24.2003	62.479	0	0	0	138	47	0	132	0	0
ENST00000298355.7	chr14	206	-1	5239	2100	1116	2023	TRIM9	TAA	TAAG	14.8936	14.3337	0.559911	0	133	128	5	0	2.84284	6.82558	0.501713	0	0	240	42	0	234	0	0
ENST00000408912.7	chr16	416	1	3581	3060	311	210	ARMC5	TAG	TAGA	13.7738	13.6618	0.111982	0	123	122	1	0	3.84636	4.46465	0.360072	0	0	48	4	0	42	0	0
ENST00000372466.8	chrX	479	-1	1710	522	246	942	NUP62CL	TGA	TGAA	24.5241	20.2688	2.35163	1.9037	219	181	21	17	14.3416	38.8291	9.55946	2.02091	0.0520463	63	24	0.447929	57	7.8584	0.202384
ENST00000239144.4	chr17	697	-1	1778	699	229	850	HOXB8	TAG	TAGG	8.62263	7.05488	1.45577	0.111982	77	63	13	1	4.84962	10.0928	6.35707	0.131744	0.0130532	102	10	0	96	0	0
ENST00000262093.10	chr18	176	-1	7632	1239	76	6317	FECH	TGA	TGAC	33.7067	32.6988	0.895858	0.111982	301	292	8	1	4.41649	26.3913	11.7876	0.0177271	0.000671703	78	116	0	72	0	0
ENST00000345317.7	chr7	130	-1	3794	1047	155	2592	SKAP2	TGA	TGAG	81.2991	78.3876	2.12766	0.783876	726	700	19	7	21.4283	74.8687	13.7269	0.302421	0.00403935	105	53	0	99	0	0
ENST00000229758.8	chr6	852	-1	2009	1311	76	622	FBXO5	TGA	TGAT	87.7941	85.8904	1.56775	0.335947	784	767	14	3	43.7004	65.5152	20.6283	0.540107	0.008244	39	15	0.223964	33	6.7868	0.103591
ENST00000355765.10	chr14	180	1	2823	1977	164	682	PRPF39	TGA	TGAT	38.7459	36.0583	2.23964	0.447929	346	322	20	4	13.7251	18.2389	13.6564	0.656787	0.0360103	129	14	0.335947	123	2.73127	0.14975
ENST00000318596.7	chr19	505	1	3075	924	145	2006	SLC25A42	TAG	TAGG	2.46361	2.12766	0.111982	0.223964	22	19	1	2	0.801174	2.30267	0.772291	0.111647	0.0484861	345	22	0	339	0	0
ENST00000369983.3	chr10	510	1	6358	5547	254	557	GBF1	TAA	TAAG	122.845	117.693	5.15118	0	1097	1051	46	0	19.3213	21.2175	20.2802	0	0	51	7	0	45	0	0
ENST00000568956.1	chr19	1199	1	3960	3147	348	465	ZNF865	TGA	TGAC	4.81524	4.70325	0	0.111982	43	42	0	1	1.21597	1.49452	0	0.240822	0.161137	243	3	0.111982	237	0.472499	0.316154
ENST00000372153.5	chr9	586	-1	3240	2523	146	571	DDX31	TAA	TAAA	39.0818	38.7459	0.223964	0.111982	349	346	2	1	12.0623	15.3571	1.534	0.196116	0.0127704	54	10	0	48	0	0
ENST00000391860.7	chr1	1760	-1	10869	1542	398	8929	PGBD5	TGA	TGAT	9.07056	8.62263	0.335947	0.111982	81	77	3	1	0.834535	5.59185	0.844087	0.0125414	0.0022428	231	98	0	225	0	0
ENST00000280571.9	chr12	892	-1	6096	603	291	5202	RILPL2	TAG	TAGA	6.15902	4.47929	1.67973	0	55	40	15	0	1.01034	7.42834	5.77228	0	0	18	72	0	12	0	0
ENST00000338891.11	chr6	716	-1	4096	3390	438	268	FAM184A	TGA	TGAA	12.2061	11.1982	0.895858	0.111982	109	100	8	1	2.98	3.30331	2.04534	0.417844	0.126493	48	3	0.111982	42	2.66624	0.807143
ENST00000265316.9	chr2	995	-1	2935	2496	279	160	ABCB6	TGA	TGAC	13.3259	12.766	0.559911	0	119	114	5	0	4.54034	5.11457	2.00685	0	0	33	4	0	27	0	0
ENST00000550804.6	chr12	424	-1	5531	2043	67	3421	CALCOCO1	TGA	TGAT	16.7973	16.1254	0.559911	0.111982	150	144	5	1	3.03694	7.89302	8.35688	0.0327338	0.00414718	228	43	0.111982	222	0.504425	0.0639077
ENST00000406855.7	chr22	88	-1	1018	687	13	318	DERL3	TGA	TGAG	9.29453	9.29453	0	0	83	83	0	0	9.13018	13.5292	0	0	0	123	6	0	117	0	0
ENST00000393240.7	chr12	614	1	3050	1236	665	1149	SYT1	TAA	TAAA	5.37515	5.26317	0	0.111982	48	47	0	1	1.76234	4.25822	0	0.0974606	0.0228876	36	23	0	30	0	0
ENST00000472174.7	chr1	555	1	942	585	75	282	ATP6V0B	TAG	TAGA	125.308	121.949	1.9037	1.45577	1119	1089	17	13	133.023	208.459	25.3826	5.1623	0.0247641	267	1	1.34379	261	5.14861	0.0246984
ENST00000393437.7	chr2	497	-1	13867	2232	634	11001	LONRF2	TGA	TGAT	15.0056	14.4457	0.447929	0.111982	134	129	4	1	1.08211	6.47209	0.706513	0.0101793	0.0015728	45	194	0	39	0	0
ENST00000397203.6	chr12	9	1	9073	3234	151	5688	ERC1	TGA	TGAC	50.0561	47.5925	1.67973	0.783876	447	425	15	7	5.51704	14.7163	11.1241	0.137812	0.00936461	126	76	0.447929	120	3.73274	0.253647
ENST00000361175.8	chr10	371	1	3904	1812	363	1729	PAPSS2	TAA	TAAG	26.7638	26.5398	0.223964	0	239	237	2	0	6.85547	14.6467	0.616982	0	0	27	31	0	21	0	0
ENST00000372458.8	chr1	545	-1	1421	807	105	509	ELOVL1	TGA	TGAG	55.7672	51.7358	3.69541	0.335947	498	462	33	3	39.245	64.1088	35.1944	0.660013	0.0102952	18	2	0	12	0	0
ENST00000371224.7	chr10	427	-1	3307	2355	137	815	ALDH18A1	TGA	TGAA	241.098	236.73	4.14334	0.223964	2153	2114	37	2	72.9053	100.522	30.2434	0.274803	0.00273375	165	10	0.223964	159	1.40858	0.0140126
ENST00000532498.7	chr12	628	-1	973	714	95	164	TSPAN19	TGA	TGAC	0.783876	0.783876	0	0	7	7	0	0	0.805628	1.09787	0	0	0	93	2	0	87	0	0
ENST00000645955.1	chr13	161	1	1784	837	153	794	RNASEH2B	TGA	TGAG	31.355	27.0997	4.25533	0	280	242	38	0	17.5757	32.3772	27.8126	0	0	48	9	0	42	0	0
ENST00000360000.8	chrX	446	-1	1086	321	140	625	TCEAL8	TGA	TGAA	125.532	101.12	23.6283	0.783876	1121	903	211	7	115.591	315.015	168.773	1.2542	0.0039814	60	9	0.671893	54	12.4425	0.039498
ENST00000374403.4	chrX	328	1	4343	3666	62	615	KIF4A	TGA	TGAA	87.5701	86.7862	0.783876	0	782	775	7	0	20.1635	23.6733	12.6432	0	0	75	10	0	69	0	0
ENST00000280871.9	chr12	264	-1	7176	1914	267	4995	SLC2A13	TAA	TAAT	8.06272	7.72678	0.335947	0	72	69	3	0	1.12357	4.03698	1.25823	0	0	84	98	0	78	0	0
ENST00000377727.1	chr6	125	-1	352	279	4	69	HIST1H4H	TAA	TAAG	760.583	753.976	5.15118	1.45577	6791	6732	45	13	2160.75	2702.42	1287.8	21.0981	0.0078071	69	0	1.45577	63	23.1074	0.00855064
ENST00000534313.6	chr11	621	1	3454	3096	167	191	SIPA1	TGA	TGAG	11.1982	10.7503	0.447929	0	100	96	4	0	3.2421	3.47232	2.68221	0	0	27	2	0	21	0	0
ENST00000354284.8	chr11	995	1	1411	1023	57	331	TMEM25	TAA	TAAC	1.45577	1.45577	0	0	13	13	0	0	1.03173	1.42304	0	0	0	96	5	0	90	0	0
ENST00000590194.5	chr17	632	-1	1497	1023	121	353	SLC25A39	TGA	TGAA	35.3864	32.2509	3.02352	0.111982	316	288	27	1	23.6382	31.5258	24.9878	0.31723	0.0100626	282	2	0	276	0	0
ENST00000335183.11	chr14	223	1	796	606	56	134	CDKN3	TAA	TAAA	49.8321	48.4883	1.11982	0.223964	445	433	10	2	62.6031	80.0137	19.9968	1.67138	0.0208886	51	3	0.223964	45	4.97699	0.0622017
ENST00000338791.11	chr7	620	-1	2566	1767	75	724	IMPDH1	TGA	TGAG	24.6361	24.4121	0	0.223964	220	218	0	2	9.60097	13.8156	0	0.309343	0.0223909	75	4	0.111982	69	1.62293	0.117471
ENST00000645929.1	chr14	48	-1	7377	6876	95	406	CHD8	TGA	TGAA	156.327	151.736	4.36731	0.223964	1396	1355	39	2	21.1912	22.0675	45.9717	0.551637	0.0249977	201	4	0.223964	195	1.14854	0.0520466
ENST00000359238.6	chr17	690	1	2270	780	261	1229	SNX11	TGA	TGAG	10.0784	8.06272	1.79172	0.223964	90	72	16	2	4.43982	10.3368	6.86481	0.182233	0.0176295	132	8	0.111982	126	0.888748	0.0859788
ENST00000611250.4	chrX	170	1	4668	2439	70	2159	JADE3	TGA	TGAT	28.3315	28.1075	0	0.223964	253	251	0	2	6.0693	11.5242	0	0.103735	0.00900151	126	38	0.111982	120	0.933185	0.0809761
ENST00000510878.1	chr1	139	1	804	435	28	341	AGTRAP	TAA	TAAG	20.6047	20.2688	0.111982	0.223964	184	181	1	2	25.6278	46.5949	3.99937	0.656787	0.0140957	234	3	0.223964	228	0.9823	0.0210817
ENST00000573759.1	chr17	104	1	2159	585	323	1251	MIS12	TAA	TAAT	18.2531	15.0056	3.24749	0	163	134	29	0	8.45443	25.6506	10.0541	0	0	39	18	0	33	0	0
ENST00000248104.11	chr16	53	-1	4275	657	589	3029	UNKL	TGA	TGAC	5.15118	2.12766	2.68757	0.335947	46	19	24	3	1.20496	3.23845	4.56294	0.11091	0.0342479	279	37	0.111982	273	0.410191	0.126663
ENST00000255882.10	chr22	46	-1	6707	6276	81	350	PI4KA	TGA	TGAG	103.696	103.584	0.111982	0	926	925	1	0	15.4608	16.5047	1.3825	0	0	279	3	0	273	0	0
ENST00000613397.4	chr11	882	1	4021	1824	1723	474	BIRC2	TAA	TAAA	33.8186	23.5163	10.3024	0	302	210	92	0	8.4105	12.8927	5.97932	0	0	54	9	0	48	0	0
ENST00000274140.10	chr5	41	1	9596	2700	198	6698	2020-03-06	TAA	TAAA	184.099	182.643	0.671893	0.783876	1644	1631	6	7	19.185	67.6456	3.3934	0.117031	0.00173007	81	141	0.335947	75	4.47929	0.066217
ENST00000573584.6	chr17	99	-1	3566	2193	6	1367	NUP88	TGA	TGAC	139.978	139.866	0	0.111982	1250	1249	0	1	39.2535	63.7783	0	0.0819183	0.00128442	27	34	0	21	0	0
ENST00000271526.9	chr1	1249	1	2023	1443	231	349	PRCC	TAG	TAGG	146.249	103.92	42.1053	0.223964	1306	928	376	2	72.293	72.0163	182.274	0.641732	0.00891093	87	4	0.111982	81	1.3825	0.019197
ENST00000328194.8	chr11	180	-1	4946	3831	275	840	DENND5A	TGA	TGAC	26.5398	23.1803	3.35947	0	237	207	30	0	5.36591	6.05072	12.2162	0	0	30	14	0	24	0	0
ENST00000309558.8	chr3	133	-1	4557	1857	7	2693	SUSD5	TAG	TAGG	42.8892	42.7772	0	0.111982	383	382	0	1	9.41172	23.0357	0	0.0415827	0.00180515	75	54	0	69	0	0
ENST00000332624.8	chr2	886	-1	6344	2712	302	3330	TRAK2	TGA	TGAG	7.95074	6.27101	1.67973	0	71	56	15	0	1.25327	2.31232	5.56203	0	0	18	63	0	12	0	0
ENST00000584773.5	chr17	773	-1	1272	729	118	425	SRSF1	TAA	TAAG	507.951	488.803	18.1411	1.00784	4536	4365	162	9	399.333	670.511	153.738	2.37139	0.00353669	102	6	0.559911	96	5.83241	0.00869845
ENST00000344517.5	chr1	1756	-1	3824	2184	49	1591	ABCB10	TAA	TAAG	44.457	44.121	0	0.335947	397	394	0	3	11.6258	20.2019	0	0.211154	0.0104522	18	35	0.223964	12	18.6637	0.923858
ENST00000301919.9	chr11	903	-1	4058	1005	1423	1630	MSANTD4	TGA	TGAT	29.6753	23.1803	6.38299	0.111982	265	207	57	1	7.31279	23.065	4.48559	0.0687008	0.00297857	21	41	0.111982	15	7.46548	0.323671
ENST00000431561.7	chr16	131	-1	3303	1155	607	1541	ZNF200	TAA	TAAT	23.8522	19.4849	4.36731	0	213	174	39	0	7.22138	16.8701	7.19491	0	0	60	27	0	54	0	0
ENST00000434041.6	chr17	661	-1	753	345	81	327	ARL17B	TGA	TGAT	19.2609	18.1411	1.11982	0	172	162	10	0	25.5789	52.583	13.825	0	0	57	5	0	51	0	0
ENST00000263805.8	chr15	117	-1	10415	5619	321	4475	ZNF106	TGA	TGAA	67.7493	67.7493	0	0	605	605	0	0	6.50497	12.0572	0	0	0	33	64	0	27	0	0
ENST00000268638.10	chr16	712	1	2623	1248	57	1318	IRF8	TAA	TAAG	3.24749	3.24749	0	0	29	29	0	0	1.23808	2.60215	0	0	0	72	18	0	66	0	0
ENST00000373116.6	chr1	467	-1	908	741	103	64	MRPS15	TAA	TAAA	94.9609	81.747	13.2139	0	848	730	118	0	104.583	110.32	128.29	0	0	30	2	0	24	0	0
ENST00000373218.5	chr10	273	1	7446	330	251	6865	EIF4EBP2	TGA	TGAC	20.2688	15.0056	3.8074	1.45577	181	134	34	13	2.7221	45.4716	15.1689	0.212057	0.0046635	18	123	0	12	0	0
ENST00000643188.1	chr20	208	-1	1895	1392	160	343	GSS	TGA	TGAG	61.5902	61.3663	0	0.223964	550	548	0	2	32.5014	44.085	0	0.652958	0.0148113	141	4	0	135	0	0
ENST00000378378.9	chr1	65	1	2777	2097	160	520	ARHGEF16	TAG	TAGC	3.47145	3.47145	0	0	31	31	0	0	1.25007	1.65544	0	0	0	492	3	0	486	0	0
ENST00000372745.1	chr10	318	-1	2275	1224	211	840	AP3M1	TGA	TGAG	136.17	132.251	3.58343	0.335947	1216	1181	32	3	59.8551	108.048	16.9831	0.399937	0.00370146	99	16	0.111982	93	1.20411	0.0111442
ENST00000370693.5	chr6	523	1	6606	603	366	5637	BAG2	TAG	TAGT	40.8735	32.4749	8.06272	0.335947	365	290	72	3	6.18733	53.8555	22.0293	0.0595967	0.0011066	63	124	0	57	0	0
ENST00000378076.4	chr10	69	-1	6502	3159	145	3198	ITGA8	TGA	TGAC	6.27101	6.15902	0	0.111982	56	55	0	1	0.964473	1.94968	0	0.0350163	0.0179601	183	55	0.111982	177	0.632668	0.324499
ENST00000322213.8	chrX	264	-1	9739	3669	122	5948	SMC1A	TAG	TAGC	383.875	382.195	0.335947	1.34379	3428	3413	3	12	39.4163	104.169	2.75366	0.225922	0.00216881	132	92	0.223964	126	1.7775	0.0170636
ENST00000414097.6	chr8	519	-1	3710	1152	862	1696	NDRG1	TAG	TAGG	93.9531	87.7941	5.93506	0.223964	839	784	53	2	25.3243	76.2101	6.88522	0.132055	0.00173277	33	23	0.111982	27	4.14749	0.0544218
ENST00000593916.5	chr19	1238	1	503	273	160	70	ZNF773	TGA	TGAA	0.447929	0.447929	0	0	4	4	0	0	0.890515	1.64077	0	0	0	70	0	0	64	0	0
ENST00000396556.6	chr3	122	-1	6555	2262	117	4176	OSBPL10	TGA	TGAT	3.47145	3.24749	0.223964	0	31	29	2	0	0.529588	1.43567	1.91423	0	0	45	69	0	39	0	0
ENST00000484866.5	chr3	842	1	1685	1425	76	184	ZNF639	TGA	TGAT	27.7716	26.9877	0.783876	0	248	241	7	0	16.4817	18.9388	10.3142	0	0	33	2	0	27	0	0
ENST00000295777.9	chr3	810	1	1862	1200	425	237	SERPINI1	TAA	TAAG	13.3259	13.1019	0.223964	0	119	117	2	0	7.15676	10.9183	0.526975	0	0	18	6	0	12	0	0
ENST00000483273.2	chr1	194	-1	2135	243	1693	199	UQCRHL	TAA	TAAA	108.623	108.511	0	0.111982	970	969	0	1	50.8772	446.546	0	0.562725	0.00126017	150	2	0.111982	144	0.777655	0.00174149
ENST00000379719.8	chr11	182	1	6117	3084	106	2927	IPO7	TGA	TGAG	399.665	391.378	7.27885	1.00784	3569	3495	65	9	65.3367	126.906	68.6684	0.344325	0.00271323	33	75	0.111982	27	4.14749	0.0326816
ENST00000394249.8	chr15	489	-1	3027	1830	112	1085	PRC1	TGA	TGAG	270.773	257.447	9.74246	3.58343	2418	2299	87	32	89.4526	140.682	86.9862	3.3027	0.0234764	42	17	0.111982	36	3.11062	0.0221111
ENST00000256442.10	chr5	193	1	1984	1269	107	608	CCNB1	TAA	TAAC	573.909	560.919	12.2061	0.783876	5125	5009	109	7	289.269	442.017	114.075	1.28927	0.00291679	120	11	0.783876	114	6.8761	0.0155562
ENST00000586682.1	chr19	425	1	1270	591	-1	680	RAB8A	TGA	TGAG	175.364	84.2107	91.0416	0.111982	1566	752	813	1	138.082	142.488	-91041.6	0.16468	0.00115574	39	7	0	33	0	0
ENST00000423759.5	chrX	342	1	7677	5655	70	1952	TAF1	TGA	TGAG	39.6417	39.5297	0.111982	0	354	353	1	0	5.1637	6.99023	1.59975	0	0	48	41	0	42	0	0
ENST00000419938.5	chr2	668	-1	1710	630	227	853	ZEB2	TGA	TGAA	5.37515	3.69541	1.67973	0	48	33	15	0	3.14336	5.86574	7.39971	0	0	54	17	0	48	0	0
ENST00000406197.5	chr7	811	-1	515	246	133	136	CNPY1	TAG	TAGG	3.8074	3.58343	0.223964	0	34	32	2	0	7.393	14.5668	1.68394	0	0	33	2	0	27	0	0
ENST00000375071.4	chr1	248	1	764	408	27	329	CDA	TGA	TGAC	0.447929	0.447929	0	0	4	4	0	0	0.586294	1.09787	0	0	0	27	4	0	21	0	0
ENST00000617178.4	chr22	312	-1	1961	657	48	1256	POLDIP3	TAA	TAAC	63.6059	63.27	0.335947	0	568	565	3	0	32.4354	96.3013	6.99889	0	0	21	12	0	15	0	0
ENST00000369878.9	chr10	526	1	15812	2595	181	13036	CNNM2	TAG	TAGG	23.8522	22.1725	1.56775	0.111982	213	198	14	1	1.50849	8.54431	8.66161	0.00859023	0.00100537	84	212	0	78	0	0
ENST00000356511.6	chr1	497	1	1034	858	10	166	PPIE	TAG	TAGA	69.093	69.093	0	0	617	617	0	0	66.8211	80.528	0	0	0	162	1	0	156	0	0
ENST00000400198.8	chr13	257	-1	3318	789	212	2317	ARGLU1	TAA	TAAA	32.3629	27.4357	4.36731	0.559911	289	245	39	5	9.75373	34.7727	20.6005	0.241654	0.00694952	129	46	0.447929	123	3.6417	0.104729
ENST00000262370.12	chr16	160	1	3885	1698	129	2058	MGRN1	TGA	TGAG	33.2587	32.0269	0.783876	0.447929	297	286	7	4	8.56081	18.8616	6.07656	0.217653	0.0115395	141	8	0	135	0	0
ENST00000380050.8	chr7	376	1	5126	1377	301	3448	CDK14	TGA	TGAC	6.83092	6.38299	0.223964	0.223964	61	57	2	2	1.3326	4.63543	0.744068	0.0649549	0.0140127	90	62	0	84	0	0
ENST00000366933.5	chr1	1681	1	5753	1053	29	4671	SPATA17	TAA	TAAA	2.57559	2.57559	0	0	23	23	0	0	0.447695	2.44596	0	0	0	39	119	0	33	0	0
ENST00000368599.4	chr6	697	1	9742	897	52	8793	CALHM5	TAG	TAGC	2.79956	2.68757	0.111982	0	25	24	1	0	0.28737	2.99618	2.1535	0	0	18	170	0	12	0	0
ENST00000381844.8	chr2	29	-1	2171	705	158	1308	YWHAQ	TAA	TAAA	453.416	450.505	1.34379	1.56775	4049	4023	12	14	208.851	639.014	8.50498	1.19859	0.00187568	207	18	1.00784	201	5.01413	0.00784667
ENST00000301717.8	chr16	67	-1	1404	1035	27	342	SPSB3	TGA	TGAC	7.05488	6.71893	0.111982	0.223964	63	60	1	2	5.02484	6.49172	4.14749	0.654867	0.100877	216	1	0.223964	210	1.0665	0.164286
ENST00000219204.8	chr16	495	1	1924	459	103	1362	ARL2BP	TAG	TAGG	20.1568	15.5655	4.25533	0.335947	180	139	38	3	10.4765	33.9118	41.3138	0.246657	0.00727348	66	22	0	60	0	0
ENST00000404914.8	chr2	1144	1	2752	1149	16	1587	ATG4B	TGA	TGAA	60.1345	60.0225	0	0.111982	537	536	0	1	21.8512	52.2389	0	0.0705622	0.00135076	30	19	0	24	0	0
ENST00000234392.3	chr2	332	1	1116	840	40	236	VAX2	TAA	TAAG	1.79172	1.79172	0	0	16	16	0	0	1.60548	2.133	0	0	0	180	2	0	174	0	0
ENST00000332496.10	chr15	475	1	3736	2481	234	1021	SEMA4B	TGA	TGAG	7.39083	7.16686	0.223964	0	66	64	2	0	1.97827	2.8887	0.957113	0	0	162	9	0	156	0	0
ENST00000314425.9	chrX	339	-1	5491	4080	125	1286	ZMYM3	TGA	TGAG	99.5522	98.6564	0.895858	0	889	881	8	0	18.1301	24.1805	7.16686	0	0	108	17	0	102	0	0
ENST00000418331.7	chr11	368	1	7800	3981	348	3471	PTPRJ	TAA	TAAT	11.7581	11.4222	0.335947	0	105	102	3	0	1.50745	2.86918	0.965364	0	0	120	46	0	114	0	0
ENST00000614691.1	chr12	458	1	1323	798	71	454	METTL7B	TAG	TAGC	15.4536	15.0056	0.447929	0	138	134	4	0	11.6807	18.804	6.30886	0	0	36	5	0	30	0	0
ENST00000506784.5	chr1	1601	1	2098	1482	214	402	CDK18	TGA	TGAG	7.39083	6.38299	0.335947	0.671893	66	57	3	6	3.5228	4.30701	1.56984	1.67138	0.38806	237	2	0.559911	231	2.42386	0.562771
ENST00000355673.8	chr12	522	1	4157	2979	270	908	MBD6	TAG	TAGC	10.8623	8.39867	2.35163	0.111982	97	75	21	1	2.61301	2.81929	8.70973	0.123328	0.0437445	45	7	0	39	0	0
ENST00000358365.7	chr17	366	1	3252	2043	221	988	RHOT1	TGA	TGAT	23.5163	22.7324	0.447929	0.335947	210	203	4	3	7.23133	11.127	2.02683	0.340027	0.0305588	54	21	0.111982	48	2.33296	0.209667
ENST00000309083.7	chr12	63	1	1136	276	365	495	PTMS	TGA	TGAG	43.7851	26.8757	16.6854	0.223964	391	240	149	2	38.5432	97.3759	45.7133	0.452454	0.00464646	207	2	0.223964	201	1.11425	0.0114428
ENST00000332853.9	chr10	195	-1	6369	930	31	5408	VSTM4	TAG	TAGT	1.67973	1.67973	0	0	15	15	0	0	0.263736	1.80617	0	0	0	30	89	0	24	0	0
ENST00000055077.8	chr7	310	-1	1640	1032	10	598	RFC2	TAG	TAGA	122.621	122.509	0	0.111982	1095	1094	0	1	74.7686	118.71	0	0.187261	0.00157747	21	10	0	15	0	0
ENST00000370784.8	chrX	605	1	1323	555	400	368	FAM122C	TAA	TAAA	1.2318	0.671893	0.559911	0	11	6	5	0	0.931069	1.21062	1.39978	0	0	90	9	0	84	0	0
ENST00000373001.4	chr1	488	-1	2636	1167	120	1349	RRAGC	TAG	TAGT	16.2374	16.1254	0	0.111982	145	144	0	1	6.15987	13.8179	0	0.0830113	0.00600754	129	25	0	123	0	0
ENST00000369489.10	chr1	962	-1	1041	720	48	273	CD58	TGA	TGAT	15.3416	15.2296	0	0.111982	137	136	0	1	14.7373	21.1522	0	0.410191	0.0193924	45	6	0	39	0	0
ENST00000354725.8	chr7	615	1	3403	2700	174	529	SND1	TAA	TAAG	396.977	386.339	10.6383	0	3545	3450	95	0	116.655	143.088	61.1397	0	0	321	5	0	315	0	0
ENST00000508192.5	chr11	559	1	2879	2142	496	241	MARK2	TAA	TAAC	39.4178	36.2822	3.1355	0	352	324	28	0	13.6915	16.9385	6.32158	0	0	241	0	0	235	0	0
ENST00000260118.7	chr8	282	-1	1203	924	32	247	GGH	TGA	TGAA	135.275	133.035	0	2.23964	1208	1188	0	20	112.448	143.977	0	9.06739	0.062978	18	8	0.335947	12	27.9956	0.194444
ENST00000651870.1	chr18	20	-1	3327	1317	180	1830	ZBTB14	TAG	TAGA	11.6462	10.8623	0.783876	0	104	97	7	0	3.5005	8.24774	4.35487	0	0	48	41	0	42	0	0
ENST00000265433.7	chr8	373	-1	4621	2232	149	2240	NBN	TAA	TAAC	90.8176	87.2342	3.35947	0.223964	811	779	30	2	19.6532	39.0834	22.5468	0.0999842	0.00255822	39	42	0.223964	33	6.7868	0.173649
ENST00000397117.5	chr3	44	-1	1558	822	586	150	SEC13	TAA	TAAC	204.816	181.747	22.9564	0.111982	1829	1623	205	1	131.461	221.104	39.1747	0.746548	0.00337646	150	0	0.111982	144	0.777655	0.00351715
ENST00000561421.5	chr15	413	1	1504	1227	152	125	FAH	TGA	TGAG	32.3629	32.0269	0.335947	0	289	286	3	0	21.5179	26.1018	2.21018	0	0	108	1	0	102	0	0
ENST00000159087.7	chr19	453	-1	4133	3666	179	288	ANO8	TAG	TAGC	4.81524	4.47929	0.335947	0	43	40	3	0	1.16507	1.22185	1.8768	0	0	288	0	0	282	0	0
ENST00000436949.5	chr7	354	-1	2505	2283	158	64	SEMA3A	TGA	TGAG	8.28669	8.28669	0	0	74	74	0	0	3.30806	3.62974	0	0	0	33	2	0	27	0	0
ENST00000380752.10	chr13	59	-1	7298	1857	381	5060	SLC7A1	TGA	TGAC	115.678	108.063	5.37515	2.23964	1033	965	48	20	15.8506	58.1922	14.108	0.442618	0.00760614	141	67	1.67973	135	12.4425	0.213817
ENST00000267202.7	chr12	882	-1	2661	825	56	1780	VPS37B	TGA	TGAG	12.654	12.542	0.111982	0	113	112	1	0	4.75535	15.2024	1.99968	0	0	126	19	0	120	0	0
ENST00000341142.7	chr2	1009	1	1479	1230	66	183	GMPPA	TGA	TGAG	41.4334	41.0975	0.335947	0	370	367	3	0	28.0145	33.4126	5.0901	0	0	171	3	0	165	0	0
ENST00000262288.7	chr17	766	1	1897	1326	49	522	SCPEP1	TAG	TAGG	69.7649	68.6451	0.895858	0.223964	623	613	8	2	36.7765	51.7686	18.2828	0.429051	0.00828786	21	9	0	15	0	0
ENST00000369893.10	chr10	521	1	6725	936	65	5724	SFXN2	TAA	TAAA	28.5555	26.9877	1.56775	0	255	241	14	0	4.24617	28.833	24.1193	0	0	102	79	0	96	0	0
ENST00000261733.7	chr12	780	1	9516	1521	44	7951	ALDH2	TAA	TAAG	72.4525	72.0046	0.111982	0.335947	647	643	1	3	7.61376	47.3403	2.54505	0.0422521	0.00089252	96	125	0.111982	90	1.24425	0.026283
ENST00000505036.5	chr4	524	-1	764	198	397	169	NDUFC1	TAA	TAAA	116.238	106.607	8.39867	1.2318	1038	952	75	11	152.143	538.42	21.1553	7.28879	0.0135374	21	3	0.559911	15	37.3274	0.0693277
ENST00000569748.5	chr16	633	-1	4509	2436	904	1169	AP1G1	TGA	TGAG	145.353	130.683	14.5577	0.111982	1298	1167	130	1	32.2362	53.6467	16.1036	0.0957932	0.00178563	111	24	0	105	0	0
ENST00000305536.11	chrX	586	1	1778	936	40	802	RBMX2	TGA	TGAA	33.9306	33.4827	0.447929	0	303	299	4	0	19.0836	35.7721	11.1982	0	0	45	14	0	39	0	0
ENST00000219299.8	chr16	518	1	5227	1101	73	4053	CCDC113	TAG	TAGC	4.70325	4.59127	0.111982	0	42	41	1	0	0.8998	4.17009	1.534	0	0	36	51	0	30	0	0
ENST00000280800.5	chr12	800	1	4742	1737	8	2997	PLBD2	TGA	TGAA	42.2173	41.6574	0	0.559911	377	372	0	5	8.90285	23.9824	0	0.186824	0.00779005	81	15	0.111982	75	1.4931	0.0622581
ENST00000434634.6	chr15	444	-1	5342	1104	55	4183	WDR73	TGA	TGAC	56.4391	56.3271	0	0.111982	504	503	0	1	10.5652	51.0209	0	0.0267708	0.000524703	21	73	0	15	0	0
ENST00000379079.7	chr11	281	-1	2424	876	271	1277	WT1	TGA	TGAG	5.26317	5.26317	0	0	47	47	0	0	2.17127	6.00818	0	0	0	66	19	0	60	0	0
ENST00000216452.9	chr14	303	-1	1349	534	59	756	PIGH	TGA	TGAG	12.318	12.2061	0	0.111982	110	109	0	1	9.13124	22.8578	0	0.148125	0.00648027	51	13	0.111982	45	2.48849	0.108869
ENST00000374296.3	chr1	314	-1	3252	1008	661	1583	PAQR7	TGA	TGAA	4.36731	4.25533	0.111982	0	39	38	1	0	1.34296	4.22155	0.169413	0	0	111	19	0	105	0	0
ENST00000394767.3	chr4	430	-1	5524	1071	445	4008	CXXC4	TAA	TAAA	5.0392	4.25533	0.783876	0	45	38	7	0	0.912238	3.97323	1.76152	0	0	39	82	0	33	0	0
ENST00000440460.6	chr11	937	1	5852	2019	291	3542	DIXDC1	TAA	TAAT	8.8466	8.06272	0.559911	0.223964	79	72	5	2	1.51172	3.99342	1.92409	0.0632311	0.0158338	18	56	0	12	0	0
ENST00000600449.8	chrX	672	-1	2675	1020	206	1449	TMEM185A	TAG	TAGA	15.1176	12.0941	2.91154	0.111982	135	108	26	1	5.65144	11.8569	14.1337	0.0772824	0.00651791	189	13	0.111982	183	0.611925	0.051609
ENST00000409465.5	chr2	844	-1	3052	2220	426	406	STAT1	TAG	TAGA	77.9396	74.9161	3.02352	0	696	669	27	0	25.5372	33.746	7.09747	0	0	102	4	0	96	0	0
ENST00000636934.1	chr8	5	1	1745	618	203	924	CLN8	TAG	TAGG	4.47929	3.1355	1.34379	0	40	28	12	0	2.56693	5.07363	6.61964	0	0	87	18	0	81	0	0
ENST00000374259.7	chrX	334	1	3256	1485	326	1445	FOXO4	TGA	TGAG	6.83092	4.70325	2.12766	0	61	42	19	0	2.09795	3.16717	6.52657	0	0	105	19	0	99	0	0
ENST00000498907.3	chr19	579	-1	2556	1044	114	1398	CEBPA	TGA	TGAG	7.05488	6.04704	1.00784	0	63	54	9	0	2.76013	5.79219	8.8407	0	0	108	14	0	102	0	0
ENST00000581312.6	chr1	1047	-1	8877	2499	339	6039	OTUD7B	TGA	TGAA	23.8522	19.5969	4.25533	0	213	175	38	0	2.68697	7.84189	12.5526	0	0	42	94	0	36	0	0
ENST00000376266.9	chr6	215	-1	2580	2316	117	147	CCHCR1	TAA	TAAG	26.9877	25.196	1.79172	0	241	225	16	0	10.4604	10.8791	15.3138	0	0	114	3	0	108	0	0
ENST00000373664.7	chr20	239	-1	5639	3174	61	2404	RBL1	TAA	TAAT	38.4099	38.2979	0	0.111982	343	342	0	1	6.81148	12.0661	0	0.0465816	0.00386052	87	48	0.111982	81	1.3825	0.114577
ENST00000449193.6	chr10	89	-1	6553	2694	2247	1612	SKIDA1	TAA	TAAA	4.81524	4.03136	0.783876	0	43	36	7	0	0.734814	1.49642	0.348854	0	0	84	29	0	78	0	0
ENST00000308736.7	chr12	908	-1	4514	3441	103	970	DHX37	TGA	TGAC	93.8411	92.8333	0.559911	0.447929	838	829	5	4	20.7889	26.9786	5.43603	0.461782	0.0171166	78	4	0.223964	72	3.11062	0.1153
ENST00000442039.3	chr16	54	-1	872	366	18	488	C16orf91	TGA	TGAC	13.1019	12.542	0	0.559911	117	112	0	5	15.0251	34.2678	0	1.14736	0.0334821	303	3	0.559911	297	1.88522	0.0550144
ENST00000258729.8	chr7	114	-1	4229	1707	375	2147	IGF2BP3	TAA	TAAA	87.9061	80.7392	6.9429	0.223964	785	721	62	2	20.7865	47.2989	18.5144	0.104315	0.00220544	114	55	0.111982	108	1.03687	0.0219217
ENST00000299927.4	chr15	447	1	7818	3771	16	4031	ZNF592	TGA	TGAC	24.5241	24.5241	0	0	219	219	0	0	3.13688	6.50334	0	0	0	462	52	0	456	0	0
ENST00000408995.5	chr2	523	-1	1322	807	99	416	FHL2	TGA	TGAA	18.925	18.701	0.111982	0.111982	169	167	1	1	14.3154	23.1735	1.13113	0.269188	0.0116162	129	12	0.111982	123	0.910425	0.0392873
ENST00000310164.3	chrX	523	1	2152	1176	467	509	ZCCHC12	TAA	TAAG	46.6966	41.5454	5.0392	0.111982	417	371	45	1	21.6992	35.3277	10.7906	0.220004	0.00622753	24	7	0	18	0	0
ENST00000358438.6	chr7	519	-1	2020	444	22	1554	POLR2J2	TGA	TGAG	19.037	15.6775	0.223964	3.1355	170	140	2	28	9.42425	35.3097	10.1802	2.0177	0.0571429	54	19	0	48	0	0
ENST00000310496.9	chr17	1040	-1	1820	963	39	818	RFNG	TGA	TGAC	7.50281	7.16686	0.111982	0.223964	67	64	1	2	4.12242	7.44223	2.87134	0.273795	0.0367894	138	4	0.111982	132	0.84835	0.113991
ENST00000361198.9	chr10	505	-1	2240	1095	618	527	LDB1	TAA	TAAA	37.4021	31.0191	6.38299	0	334	277	57	0	16.6974	28.3279	10.3285	0	0	78	7	0	72	0	0
ENST00000339077.10	chr7	110	1	5574	1728	236	3610	KLHL7	TGA	TGAA	43.3371	40.0896	3.24749	0	387	358	29	0	7.77487	23.2	13.7605	0	0	36	78	0	30	0	0
ENST00000251303.10	chr16	367	1	1046	795	162	89	SLX1A	TGA	TGAT	23.7402	18.0291	5.59911	0.111982	212	161	50	1	22.6962	22.6782	34.5624	1.25823	0.0554819	72	3	0.111982	66	1.6967	0.0748165
ENST00000368468.4	chr6	717	-1	4973	1929	436	2608	MAN1A1	TAA	TAAA	87.1222	81.747	4.81524	0.559911	778	730	43	5	17.519	42.3779	11.0441	0.21469	0.00506608	51	51	0.111982	45	2.48849	0.0587215
ENST00000225698.8	chr17	101	-1	1124	816	76	232	C1QBP	TAG	TAGA	991.939	977.381	12.542	2.01568	8857	8727	112	18	882.508	1197.77	165.026	8.68828	0.00725371	66	6	1.34379	60	22.3964	0.0186984
ENST00000210060.12	chr19	338	-1	1300	1077	108	115	DHPS	TGA	TGAG	54.1994	51.7358	2.12766	0.335947	484	462	19	3	41.6919	48.037	19.7006	2.92128	0.0608131	99	2	0.335947	93	3.61233	0.075199
ENST00000290649.10	chr16	472	-1	3562	1899	212	1451	AMFR	TAG	TAGC	34.3786	33.2587	0.447929	0.671893	307	297	4	6	9.65147	17.5138	2.11287	0.463055	0.0264394	48	24	0.111982	42	2.66624	0.152237
ENST00000376087.4	chr10	112	-1	6546	5100	160	1286	ANKRD26	TGA	TGAA	31.9149	30.3472	1.34379	0.223964	285	271	12	2	4.87549	5.95043	8.39867	0.174156	0.0292678	66	23	0.223964	60	3.73274	0.627306
ENST00000310571.7	chr11	758	1	4949	1146	47	3756	PAAF1	TGA	TGAC	29.2274	29.0034	0	0.223964	261	259	0	2	5.90571	25.3084	0	0.0596285	0.00235608	27	69	0	21	0	0
ENST00000361684.8	chr22	244	-1	3548	1191	218	2139	TMEM184B	TAG	TAGG	18.813	18.0291	0.223964	0.559911	168	161	2	5	5.30243	15.1378	1.02736	0.261763	0.017292	36	18	0	30	0	0
ENST00000618612.4	chr20	22	-1	1473	261	168	1044	FKBP1A	TGA	TGAA	71.1087	64.7257	6.04704	0.335947	635	578	54	3	48.2748	247.991	35.9943	0.321788	0.00129758	57	14	0.111982	51	2.19573	0.00885406
ENST00000383794.7	chr3	73	1	2895	1371	69	1455	CCDC174	TGA	TGAT	14.3337	14.1098	0.111982	0.111982	128	126	1	1	4.9512	10.2916	1.62293	0.0769637	0.00747832	18	20	0	12	0	0
ENST00000215659.13	chr22	364	-1	1733	1071	168	494	MAPK12	TGA	TGAA	12.318	11.7581	0.559911	0	110	105	5	0	7.10793	10.9787	3.33281	0	0	494	0	0	488	0	0
ENST00000559107.5	chr15	518	-1	1308	597	17	694	TM2D3	TGA	TGAC	51.1759	51.0639	0	0.111982	457	456	0	1	39.1253	85.5342	0	0.161358	0.00188647	51	9	0	45	0	0
ENST00000436587.6	chr7	62	1	6190	1059	217	4914	C1GALT1	TGA	TGAA	16.1254	15.1176	1.00784	0	144	135	9	0	2.60508	14.2754	4.64443	0	0	27	110	0	21	0	0
ENST00000602748.5	chr7	754	1	3009	2298	274	437	CUL1	TAA	TAAC	202.128	191.154	10.5263	0.447929	1805	1707	94	4	67.1745	83.1826	38.4173	1.02501	0.0123224	27	7	0	21	0	0
ENST00000349830.8	chr8	6	1	5603	4002	229	1372	ARHGEF10	TAA	TAAG	19.5969	19.2609	0.223964	0.111982	175	172	2	1	3.49757	4.81283	0.978011	0.0816197	0.0169588	45	29	0.111982	39	2.87134	0.596601
ENST00000262803.9	chr19	499	1	5303	3324	266	1713	UPF1	TAA	TAAA	159.575	155.207	3.91938	0.447929	1425	1386	35	4	30.0914	46.693	14.7345	0.261488	0.00560016	36	17	0	30	0	0
ENST00000354190.10	chr11	754	1	1932	699	22	1211	PLEKHB1	TGA	TGAG	5.15118	5.0392	0	0.111982	46	45	0	1	2.66624	7.20916	0	0.0924709	0.0128269	159	14	0	153	0	0
ENST00000441493.7	chr22	12	-1	9402	5976	349	3077	MICAL3	TGA	TGAG	25.8679	24.8601	0.559911	0.447929	231	222	5	4	2.75132	4.15998	1.60433	0.145573	0.0349937	81	28	0	75	0	0
ENST00000263346.13	chr16	758	1	2203	1998	70	135	TCF25	TGA	TGAG	73.5723	73.2364	0.223964	0.111982	657	654	2	1	33.3964	36.6549	3.19949	0.829498	0.02263	78	1	0.111982	72	1.55531	0.0424312
ENST00000649800.1	chr1	600	-1	2764	1365	238	1161	MKNK1	TGA	TGAA	24.3001	18.3651	5.71109	0.223964	217	164	51	2	8.79166	13.4543	23.9962	0.192907	0.0143379	30	14	0	24	0	0
ENST00000293471.11	chr19	1089	1	3120	1821	421	878	ZNF613	TAA	TAAA	4.25533	3.47145	0.783876	0	38	31	7	0	1.36389	1.90634	1.86194	0	0	114	18	0	108	0	0
ENST00000263681.6	chr11	768	1	3776	1368	123	2285	POLD3	TAA	TAAA	56.1031	55.5432	0.223964	0.335947	501	496	2	3	14.8578	40.6018	1.82085	0.147023	0.00362109	159	33	0.111982	153	0.73191	0.0180266
ENST00000243082.4	chr12	427	1	1994	1104	108	782	HOXC11	TGA	TGAA	6.15902	5.82308	0	0.335947	55	52	0	3	3.08878	5.27453	0	0.429599	0.081448	63	10	0	57	0	0
ENST00000369592.1	chr10	553	-1	1065	684	299	82	SMNDC1	TAA	TAAT	94.737	94.2891	0.223964	0.223964	846	842	2	2	88.9549	137.849	0.749045	2.73127	0.0198135	69	3	0.223964	63	3.55499	0.0257889
ENST00000613478.1	chr17	447	1	2029	351	118	1560	CISD3	TGA	TGAG	11.9821	11.0862	0.111982	0.783876	107	99	1	7	5.90542	31.5847	0.949002	0.502484	0.0159091	87	15	0.447929	81	5.52999	0.175084
ENST00000424789.6	chr17	820	1	11676	5940	-2	5738	TANC2	TAA	TAAA	45.4648	22.5084	22.7324	0.223964	406	201	203	2	3.89387	3.7893	-11366.2	0.0390318	0.0103005	87	84	0	81	0	0
ENST00000553393.5	chr15	494	-1	450	81	159	210	FAM174B	TGA	TGAA	0.895858	0.447929	0.447929	0	8	4	4	0	1.9908	5.52999	2.81716	0	0	45	2	0	39	0	0
ENST00000225430.9	chr17	459	1	692	558	56	78	RPL19	TAA	TAAA	1094.85	1088.58	4.47929	1.79172	9776	9720	40	16	1582.15	1950.86	79.9873	22.9707	0.0117747	45	2	1.00784	39	25.8421	0.0132465
ENST00000257910.8	chr12	532	1	3633	600	110	2923	TSPAN31	TGA	TGAG	15.6775	13.9978	1.67973	0	140	125	15	0	4.31531	23.3296	15.2703	0	0	18	49	0	12	0	0
ENST00000302558.7	chr2	558	-1	5531	5265	186	80	RGPD8	TGA	TGAG	46.9206	46.0247	0.895858	0	419	411	8	0	8.4832	8.74163	4.81644	0	0	36	1	0	30	0	0
ENST00000519948.3	chr12	599	1	7559	261	280	7018	ATXN7L3B	TAG	TAGC	64.0538	42.7772	17.9172	3.35947	572	382	160	30	8.47385	163.897	63.9899	0.478693	0.00292069	42	152	0.223964	36	6.22124	0.0379581
ENST00000299237.2	chr16	513	-1	4176	1716	617	1843	ZNF319	TGA	TGAC	5.15118	4.03136	1.11982	0	46	36	10	0	1.23352	2.34928	1.81495	0	0	72	25	0	66	0	0
ENST00000449934.7	chr6	220	1	1325	966	32	327	MICA	TAA	TAAG	12.0941	11.9821	0	0.111982	108	107	0	1	9.12761	12.4038	0	0.342453	0.0276087	78	3	0.111982	72	1.55531	0.125389
ENST00000328459.11	chr14	426	-1	19426	2499	129	16798	TTC7B	TGA	TGAG	9.74246	9.51849	0	0.223964	87	85	0	2	0.501516	3.80892	0	0.0133328	0.00350042	261	187	0.111982	255	0.439146	0.115294
ENST00000426216.6	chr18	236	1	4316	3411	11	894	ATP9B	TAA	TAAG	11.6462	11.6462	0	0	104	104	0	0	2.69837	3.41429	0	0	0	285	5	0	279	0	0
ENST00000361432.3	chr10	601	1	2396	1041	24	1331	FAM45A	TGA	TGAC	10.6383	10.3024	0	0.335947	95	92	0	3	4.44003	9.89661	0	0.252402	0.0255039	24	27	0	18	0	0
ENST00000478753.4	chr16	377	-1	2506	1314	448	744	SEPHS2	TGA	TGAG	105.487	49.3842	55.3192	0.783876	942	441	493	7	42.0939	37.5831	123.48	1.0536	0.0280338	105	11	0.783876	99	7.91794	0.210678
ENST00000267430.10	chr14	182	1	7086	6114	96	876	FANCM	TAA	TAAT	49.2722	48.7123	0.559911	0	440	435	5	0	6.95346	7.96733	5.83241	0	0	60	26	0	54	0	0
ENST00000325722.8	chr1	447	-1	4732	3117	219	1396	KIAA0319L	TAG	TAGC	33.4827	32.3629	1.11982	0	299	289	10	0	7.0758	10.3827	5.11334	0	0	183	13	0	177	0	0
ENST00000409218.5	chr2	234	-1	603	408	132	63	MCFD2	TAG	TAGA	64.3898	63.6059	0	0.783876	575	568	0	7	106.782	155.897	0	12.4425	0.0798122	45	5	0.447929	39	11.4854	0.0736728
ENST00000326446.9	chr2	688	1	2760	648	705	1407	ARL6IP6	TAA	TAAA	30.6831	30.0112	0.111982	0.559911	274	268	1	5	11.1171	46.3136	0.15884	0.397947	0.00859243	90	36	0.223964	84	2.66624	0.0575693
ENST00000292841.9	chr19	667	-1	8573	2277	253	6043	ZNF585A	TGA	TGAG	9.63047	4.81524	4.81524	0	86	43	43	0	1.12335	2.11473	19.0326	0	0	90	90	0	84	0	0
ENST00000237305.11	chr6	770	-1	2356	1263	83	1010	SGK1	TGA	TGAA	7.16686	7.16686	0	0	64	64	0	0	3.04196	5.67448	0	0	0	54	13	0	48	0	0
ENST00000373654.1	chr9	468	-1	2002	1293	206	503	ZBTB26	TGA	TGAG	4.36731	4.36731	0	0	39	39	0	0	2.18147	3.37765	0	0	0	84	12	0	78	0	0
ENST00000224652.10	chr10	614	-1	4885	1524	108	3253	ATE1	TGA	TGAC	20.0448	19.9328	0	0.111982	179	178	0	1	4.10334	13.0793	0	0.0344243	0.00263197	39	60	0	33	0	0
ENST00000295206.6	chr2	584	-1	2412	1146	505	761	EN1	TAG	TAGC	5.59911	4.14334	1.34379	0.111982	50	37	12	1	2.32136	3.61548	2.66096	0.147151	0.0407004	156	5	0	150	0	0
ENST00000518235.5	chr5	762	-1	1199	657	4	538	MRNIP	TAA	TAAA	9.29453	9.07056	0	0.223964	83	81	0	2	7.7519	13.806	0	0.416291	0.0301528	24	7	0	18	0	0
ENST00000513140.5	chr4	164	-1	4121	2178	464	1479	APBB2	TAG	TAGC	16.0135	13.2139	2.79956	0	143	118	25	0	3.88582	6.06699	6.03353	0	0	45	30	0	39	0	0
ENST00000323060.3	chr19	887	-1	2205	510	72	1623	OPA3	TAG	TAGG	5.15118	4.59127	0.447929	0.111982	46	41	4	1	2.33614	9.00249	6.22124	0.0689971	0.00766422	30	20	0	24	0	0
ENST00000360321.7	chr20	5	-1	1531	1059	134	338	C20orf96	TAG	TAGA	7.83876	7.72678	0	0.111982	70	69	0	1	5.12002	7.29629	0	0.331308	0.0454078	99	2	0.111982	93	1.20411	0.16503
ENST00000327473.9	chr19	143	1	3771	528	111	3132	TNFAIP8L1	TGA	TGAA	1.2318	1.11982	0	0.111982	11	10	0	1	0.326652	2.12088	0	0.0357542	0.0168582	123	29	0	117	0	0
ENST00000374467.4	chr6	311	-1	2125	603	277	1245	BAK1	TGA	TGAC	24.4121	13.6618	10.4143	0.335947	218	122	93	3	11.4881	22.6564	37.5969	0.269837	0.0119099	51	12	0.223964	45	4.97699	0.219672
ENST00000285605.8	chr10	454	1	3168	489	141	2538	MARVELD1	TGA	TGAG	6.04704	4.25533	1.2318	0.559911	54	38	11	5	1.90879	8.7021	8.7362	0.220611	0.0253515	342	24	0.111982	336	0.333281	0.0382989
ENST00000320285.9	chr6	889	-1	7878	1104	207	6567	AGPAT4	TGA	TGAC	25.196	20.4928	3.8074	0.895858	225	183	34	8	3.19827	18.5623	18.3932	0.136418	0.00734921	66	93	0.895858	60	14.931	0.804372
ENST00000446558.5	chr2	956	1	450	195	14	241	RPL37A	TAA	TAAC	718.03	715.455	2.57559	0	6411	6388	23	0	1595.62	3669	183.971	0	0	120	1	0	114	0	0
ENST00000617612.2	chr11	318	1	1202	336	262	604	C11orf96	TAA	TAAG	0.895858	0.559911	0.223964	0.111982	8	5	2	1	0.745306	1.6664	0.854826	0.185401	0.111258	60	9	0	54	0	0
ENST00000223023.5	chr7	602	-1	4318	1485	263	2570	WASL	TGA	TGAT	33.8186	31.9149	1.79172	0.111982	302	285	16	1	7.83201	21.4915	6.81261	0.0435729	0.00202744	45	53	0.111982	39	2.87134	0.133603
ENST00000393010.6	chr3	709	1	3115	1410	272	1433	PXYLP1	TAA	TAAA	8.8466	7.95074	0.895858	0	79	71	8	0	2.84	5.63882	3.2936	0	0	24	30	0	18	0	0
ENST00000415061.8	chr19	1170	-1	1825	963	110	752	RDH13	TAA	TAAC	17.4692	16.0135	1.45577	0	156	143	13	0	9.57218	16.6287	13.2343	0	0	18	8	0	12	0	0
ENST00000569453.5	chr16	759	1	1807	1323	387	97	DEF8	TAG	TAGC	28.4435	26.6518	1.79172	0	254	238	16	0	15.7407	20.145	4.62976	0	0	97	0	0	91	0	0
ENST00000369762.7	chrX	746	1	2009	1380	10	619	ATP6AP1	TGA	TGAC	207.951	207.503	0.111982	0.335947	1857	1853	1	3	103.51	150.365	11.1982	0.542725	0.00360939	153	12	0.223964	147	1.52357	0.0101325
ENST00000302754.6	chr19	346	1	1785	1011	280	494	JUNB	TGA	TGAA	7.27885	6.27101	1.00784	0	65	56	9	0	4.07778	6.20278	3.59943	0	0	477	1	0	471	0	0
ENST00000299957.11	chr15	147	1	3929	1278	305	2346	CASC4	TAA	TAAG	13.6618	11.1982	2.46361	0	122	100	22	0	3.47718	8.7623	8.07741	0	0	39	60	0	33	0	0
ENST00000511685.6	chr4	658	1	10878	8067	144	2667	TENM3	TAA	TAAC	43.2251	43.0012	0.223964	0	386	384	2	0	3.97363	5.3305	1.55531	0	0	324	48	0	318	0	0
ENST00000265643.4	chr11	705	1	704	339	183	182	GAL	TGA	TGAG	70.6608	53.3035	16.2374	1.11982	631	476	145	10	100.37	157.238	88.7291	6.15287	0.039131	39	4	0.335947	33	10.1802	0.0647441
ENST00000330188.13	chr1	1168	-1	2063	714	80	1269	TPM3	TAG	TAGA	203.92	198.768	4.70325	0.447929	1821	1775	42	4	98.8462	278.387	58.7907	0.352978	0.00126794	39	15	0	33	0	0
ENST00000593751.7	chrX	257	1	2897	609	1605	683	AC234031.1	TGA	TGAG	3.58343	1.56775	2.01568	0	32	14	18	0	1.23695	2.5743	1.25588	0	0	114	8	0	108	0	0
ENST00000216297.7	chr14	47	-1	4388	3111	86	1191	SUPT16H	TAA	TAAC	482.979	480.852	1.79172	0.335947	4313	4294	16	3	110.068	154.565	20.8339	0.282071	0.00182494	252	13	0.111982	246	0.455212	0.00294512
ENST00000589296.5	chr17	981	-1	2114	162	68	1884	CYTH1	TAA	TAAG	0.783876	0.671893	0	0.111982	7	6	0	1	0.370802	4.14749	0	0.0594386	0.0143312	147	20	0	141	0	0
ENST00000599612.2	chr19	478	1	1363	588	94	681	MPV17L2	TGA	TGAA	28.8914	27.9956	0.559911	0.335947	258	250	5	3	21.1969	47.6115	5.9565	0.493314	0.0103612	57	9	0	51	0	0
ENST00000372236.8	chr6	440	1	3495	2109	289	1097	POLH	TAG	TAGT	36.8422	32.5868	4.25533	0	329	291	38	0	10.5414	15.4513	14.7243	0	0	24	23	0	18	0	0
ENST00000425651.7	chr7	556	-1	6141	3882	4	2255	NRCAM	TAA	TAAT	16.9093	16.7973	0.111982	0	151	150	1	0	2.75351	4.32698	27.9956	0	0	126	40	0	120	0	0
ENST00000543171.5	chr12	853	1	1732	993	298	441	P2RX4	TGA	TGAG	3.02352	3.02352	0	0	27	27	0	0	1.74568	3.04483	0	0	0	252	2	0	246	0	0
ENST00000261590.13	chr18	95	1	5652	3324	69	2259	DSG2	TAA	TAAA	317.358	317.022	0.111982	0.223964	2834	2831	1	2	56.1496	95.3736	1.62293	0.0991432	0.00103952	48	46	0	42	0	0
ENST00000634607.1	chr7	71	1	3362	2814	414	134	PHF14	TAA	TAAA	80.2913	70.7728	9.51849	0	717	632	85	0	23.882	25.1502	22.9915	0	0	90	3	0	84	0	0
ENST00000518529.6	chr14	159	-1	1486	252	670	564	SFTA3	TGA	TGAC	2.79956	1.34379	0.895858	0.559911	25	12	8	5	1.88395	5.33249	1.3371	0.99275	0.18617	126	9	0.559911	120	4.66593	0.875
ENST00000442196.7	chr15	214	-1	3408	2391	42	975	CCPG1	TGA	TGAT	60.9183	60.5824	0.335947	0	544	541	3	0	17.8751	25.3377	7.99873	0	0	21	16	0	15	0	0
ENST00000374787.7	chr9	368	1	4221	3561	330	330	SMC2	TAA	TAAA	274.692	271.109	3.35947	0.223964	2453	2421	30	2	65.0776	76.1328	10.1802	0.67868	0.00891442	39	7	0.111982	33	3.3934	0.0445721
ENST00000311413.4	chr11	1022	1	2742	1269	590	883	RNF26	TGA	TGAA	23.5163	12.9899	10.5263	0	210	116	94	0	8.57632	10.2364	17.8412	0	0	66	7	0	60	0	0
ENST00000254901.9	chr5	459	1	2054	726	116	1212	REEP2	TGA	TGAG	2.35163	2.01568	0.223964	0.111982	21	18	2	1	1.1449	2.77642	1.93073	0.0923946	0.0332783	36	7	0	30	0	0
ENST00000261658.7	chr16	216	1	2858	1320	135	1403	BFAR	TGA	TGAC	51.3999	43.897	7.27885	0.223964	459	392	65	2	17.9846	33.2553	53.9174	0.159633	0.00480021	39	26	0.223964	33	6.7868	0.204082
ENST00000333050.7	chr16	180	-1	1394	609	19	766	TMEM186	TGA	TGAA	10.7503	10.6383	0	0.111982	96	95	0	1	7.71183	17.4685	0	0.146191	0.00836883	27	11	0	21	0	0
ENST00000378164.7	chr8	474	-1	4982	3567	271	1144	TAF2	TGA	TGAG	72.0046	65.8456	6.15902	0	643	588	55	0	14.4529	18.4596	22.727	0	0	123	19	0	117	0	0
ENST00000310144.11	chr17	830	1	1286	1188	54	44	PSMC5	TGA	TGAG	209.183	204.592	4.36731	0.223964	1868	1827	39	2	162.662	172.215	80.8761	5.0901	0.0295567	44	0	0.223964	38	5.8938	0.0342235
ENST00000377191.5	chr20	122	1	3363	2820	62	481	XRN2	TAA	TAAG	235.499	235.275	0.111982	0.111982	2103	2101	1	1	70.0264	83.4307	1.80617	0.232811	0.00279047	201	12	0.111982	195	0.574268	0.00688317
ENST00000320672.8	chr5	272	-1	8735	1053	205	7477	SSBP2	TGA	TGAT	15.4536	15.1176	0.335947	0	138	135	3	0	1.76915	14.3567	1.63876	0	0	156	154	0	150	0	0
ENST00000371485.7	chr10	410	1	2593	1362	298	933	CEP55	TAG	TAGC	52.6317	46.9206	5.71109	0	470	419	51	0	20.2976	34.4498	19.1647	0	0	21	25	0	15	0	0
ENST00000228251.9	chr12	137	-1	1886	1086	206	594	YBX3	TAA	TAAC	237.738	225.532	11.6462	0.559911	2123	2014	104	5	126.054	207.672	56.5347	0.942612	0.00453893	51	8	0	45	0	0
ENST00000221566.7	chr19	86	-1	2186	909	58	1219	SGTA	TGA	TGAC	97.9845	96.5287	0.335947	1.11982	875	862	3	10	44.8236	106.192	5.79219	0.91864	0.00865073	21	13	0.335947	15	22.3964	0.210905
ENST00000645500.1	chr11	871	-1	2835	1602	372	861	CCDC82	TAA	TAAC	28.8914	26.0919	2.79956	0	258	233	25	0	10.191	16.2871	7.52569	0	0	126	18	0	120	0	0
ENST00000234256.4	chr2	292	1	4518	1566	239	2713	SLC1A4	TGA	TGAT	11.9821	10.9743	0.783876	0.223964	107	98	7	2	2.65208	7.00783	3.27981	0.0825523	0.01178	387	31	0.111982	381	0.293917	0.0419412
ENST00000367993.7	chr1	1331	1	1997	1359	442	196	NDUFS2	TGA	TGAG	287.57	286.787	0.335947	0.447929	2568	2561	3	4	144.001	211.028	0.760061	2.28535	0.0108296	177	3	0.447929	171	2.61947	0.0124129
ENST00000541970.5	chr6	921	-1	3333	1002	73	2258	PDCD2	TAA	TAAA	79.9553	78.1636	1.67973	0.111982	714	698	15	1	23.989	78.0076	23.0101	0.0495936	0.000635753	114	41	0.111982	108	1.03687	0.0132919
ENST00000264607.9	chr2	1116	1	6846	975	138	5733	ASB1	TAG	TAGA	8.06272	7.72678	0	0.335947	72	69	0	3	1.17773	7.9249	0	0.0585988	0.00739426	96	77	0	90	0	0
ENST00000336702.7	chr11	1014	1	4726	2091	353	2282	C2CD2L	TGA	TGAG	7.95074	6.49497	1.45577	0	71	58	13	0	1.68234	3.10616	4.12399	0	0	174	37	0	168	0	0
ENST00000287380.6	chr8	484	1	3433	3168	57	208	TBC1D31	TAG	TAGA	50.168	50.168	0	0	448	448	0	0	14.6135	15.8359	0	0	0	66	4	0	60	0	0
ENST00000367090.3	chr6	869	1	5345	1806	5	3534	TMEM181	TGA	TGAG	20.6047	20.1568	0	0.447929	184	180	0	4	3.85495	11.161	0	0.126748	0.0113563	63	64	0	57	0	0
ENST00000360423.11	chr16	340	1	1345	855	95	395	SULT1A4	TGA	TGAG	1.11982	1.00784	0	0.111982	10	9	0	1	0.832582	1.17876	0	0.283499	0.240506	48	9	0	42	0	0
ENST00000534064.6	chr11	802	-1	3101	2859	19	223	INTS4	TAA	TAAG	46.3607	46.1367	0.111982	0.111982	414	412	1	1	14.9502	16.1374	5.8938	0.502163	0.031118	45	3	0.111982	39	2.87134	0.177931
ENST00000430121.3	chr3	193	1	3344	1695	326	1323	GASK1A	TAA	TAAG	3.02352	2.46361	0.559911	0	27	22	5	0	0.904163	1.45346	1.71752	0	0	150	22	0	144	0	0
ENST00000298894.5	chr14	445	-1	2362	1023	357	982	MOAP1	TGA	TGAG	21.1646	18.0291	3.1355	0	189	161	28	0	8.96048	17.6238	8.78292	0	0	33	16	0	27	0	0
ENST00000591134.5	chr19	670	1	502	108	224	170	HKR1	TGA	TGAA	0.671893	0.447929	0.223964	0	6	4	2	0	1.33843	4.14749	0.999842	0	0	21	2	0	15	0	0
ENST00000569529.6	chr16	32	1	825	675	123	27	FAM173A	TGA	TGAG	13.8858	13.4379	0.447929	0	124	120	4	0	16.8313	19.908	3.6417	0	0	27	0	0	21	0	0
ENST00000400809.8	chr1	29	-1	3067	1530	23	1514	CCNL2	TGA	TGAG	18.1411	18.1411	0	0	162	162	0	0	5.91494	11.8569	0	0	0	66	33	0	60	0	0
ENST00000367510.8	chr1	1493	1	3362	978	88	2296	RNF2	TGA	TGAG	51.1759	49.1602	1.67973	0.335947	457	439	15	3	15.2219	50.2661	19.0879	0.146318	0.00291088	21	41	0	15	0	0
ENST00000587394.6	chr19	70	-1	892	801	18	73	PLEKHJ1	TAG	TAGC	16.5734	16.5734	0	0	148	148	0	0	18.58	20.6909	0	0	0	73	0	0	67	0	0
ENST00000367267.5	chr1	1562	-1	7569	1227	187	6155	SYT2	TAG	TAGA	3.47145	3.47145	0	0	31	31	0	0	0.45864	2.82922	0	0	0	81	60	0	75	0	0
ENST00000394169.5	chr17	475	-1	2185	429	1489	267	ORMDL3	TGA	TGAG	14.6697	14.6697	0	0	131	131	0	0	6.71381	34.195	0	0	0	117	4	0	111	0	0
ENST00000541050.5	chr12	739	-1	2442	1392	220	830	CORO1C	TGA	TGAA	195.409	194.849	0.111982	0.447929	1745	1740	1	4	80.0201	139.978	0.50901	0.539673	0.00385542	204	10	0.223964	198	1.13113	0.00808081
ENST00000367004.3	chr1	1652	1	1782	1641	54	87	TRAF5	TAG	TAGT	6.49497	6.49497	0	0	58	58	0	0	3.64476	3.95793	0	0	0	63	2	0	57	0	0
ENST00000286523.9	chr14	347	-1	8046	3105	777	4164	ELMSAN1	TAA	TAAG	19.8209	16.2374	2.46361	1.11982	177	145	22	10	2.46344	5.22944	3.17067	0.26893	0.051426	309	63	0	303	0	0
ENST00000008527.10	chr12	727	-1	2942	1728	582	632	CRY1	TAG	TAGA	35.2744	25.532	9.51849	0.223964	315	228	85	2	11.9899	14.7754	16.3548	0.354374	0.023984	126	14	0.111982	120	0.933185	0.0631579
ENST00000501597.3	chr12	477	1	424	45	77	302	RPL41	TAA	TAAA	442.778	401.008	40.5376	1.2318	3953	3580	361	11	1044.29	8911.3	526.462	4.07882	0.000457714	102	5	0.335947	96	3.49945	0.000392698
ENST00000315930.11	chrX	642	-1	19530	705	708	18117	FGF13	TAG	TAGC	11.1982	7.50281	3.58343	0.111982	100	67	32	1	0.573386	10.6423	5.06134	0.00618106	0.000580802	66	315	0	60	0	0
ENST00000373115.5	chr10	286	1	6889	1407	401	5081	CHST3	TAG	TAGG	4.25533	3.35947	0.895858	0	38	30	8	0	0.617699	2.38768	2.23406	0	0	33	54	0	27	0	0
ENST00000336615.9	chr11	35	1	2371	1482	184	705	PNPLA2	TGA	TGAG	63.4939	62.4861	0.895858	0.111982	567	558	8	1	26.7794	42.1634	4.86879	0.15884	0.00376725	63	6	0.111982	57	1.9646	0.046595
ENST00000287008.7	chr5	524	-1	4748	3681	142	925	PCDH1	TGA	TGAG	3.69541	3.69541	0	0	33	33	0	0	0.77831	1.00392	0	0	0	351	1	0	345	0	0
ENST00000378618.6	chr11	348	1	1121	948	46	127	C11orf49	TGA	TGAG	17.0213	16.4614	0.559911	0	152	147	5	0	15.184	17.3643	12.172	0	0	96	1	0	90	0	0
ENST00000288943.5	chr2	455	-1	1640	912	80	648	DUSP2	TGA	TGAG	3.8074	3.47145	0.335947	0	34	31	3	0	2.32158	3.80641	4.19933	0	0	321	5	0	315	0	0
ENST00000542172.1	chr11	238	1	286	90	131	65	SPTY2D1OS	TGA	TGAA	0.447929	0.447929	0	0	4	4	0	0	1.56619	4.97699	0	0	0	51	1	0	45	0	0
ENST00000453372.7	chr19	258	-1	12594	1248	210	11136	ZNF562	TAA	TAAA	18.925	14.7817	3.91938	0.223964	169	132	35	2	1.5027	11.8443	18.6637	0.0201118	0.00169801	81	182	0.223964	75	2.98619	0.252121
ENST00000394752.8	chr3	367	-1	4508	2568	382	1558	SFMBT1	TGA	TGAG	14.5577	13.8858	0.671893	0	130	124	6	0	3.2293	5.40724	1.75888	0	0	18	29	0	12	0	0
ENST00000380639.10	chr5	213	1	11100	1134	4	9962	PTCD2	TAA	TAAC	17.2453	17.2453	0	0	154	154	0	0	1.55363	15.2075	0	0	0	159	160	0	153	0	0
ENST00000416651.5	chr2	878	1	922	726	23	173	NIF3L1	TGA	TGAG	32.8108	32.3629	0.447929	0	293	289	4	0	35.5865	44.577	19.4752	0	0	108	3	0	102	0	0
ENST00000619747.1	chr8	406	1	2713	921	674	1118	LAPTM4B	TAA	TAAG	250.952	249.384	0	1.56775	2241	2227	0	14	92.4999	270.776	0	1.40228	0.00517876	36	21	0.223964	30	7.46548	0.0275707
ENST00000614300.4	chr1	42	-1	2111	708	835	568	SLC35E2B	TAA	TAAA	5.15118	1.34379	3.8074	0	46	12	34	0	2.44016	1.898	4.55976	0	0	201	4	0	195	0	0
ENST00000381638.7	chr17	59	-1	11421	8853	129	2439	ZZEF1	TAG	TAGC	53.5275	53.3036	0.111982	0.111982	478	476	1	1	4.68676	6.02096	0.868079	0.0459132	0.00762556	27	19	0	21	0	0
ENST00000360203.10	chr20	457	1	4585	3870	337	378	RTEL1	TGA	TGAG	20.1568	17.8052	2.35163	0	180	159	21	0	4.39625	4.60082	6.97812	0	0	39	4	0	33	0	0
ENST00000319977.8	chr17	625	1	2680	1911	231	538	C17orf53	TGA	TGAG	15.3416	13.9978	1.34379	0	137	125	12	0	5.72447	7.32485	5.81726	0	0	90	4	0	84	0	0
ENST00000506438.5	chr5	433	-1	1260	912	128	220	PITX1	TGA	TGAC	8.95858	8.39867	0.335947	0.223964	80	75	3	2	7.10998	9.20907	2.62458	1.01802	0.110545	220	0	0.223964	214	1.04656	0.113645
ENST00000250111.9	chr17	161	1	3296	840	587	1869	ATP1B2	TGA	TGAG	3.35947	2.68757	0.447929	0.223964	30	24	4	2	1.01926	3.19949	0.763082	0.119831	0.0374532	282	19	0.111982	276	0.405733	0.126812
ENST00000426126.6	chr12	610	1	5214	1866	643	2705	ZDHHC17	TAG	TAGC	28.8914	28.8914	0	0	258	258	0	0	5.54112	15.4831	0	0	0	18	61	0	12	0	0
ENST00000431473.4	chr1	524	1	10532	1143	137	9252	RIMKLA	TGA	TGAA	1.79172	1.67973	0	0.111982	16	15	0	1	0.170121	1.46958	0	0.0121036	0.00823606	48	162	0	42	0	0
ENST00000395831.7	chr7	204	-1	2335	1494	41	800	POLM	TGA	TGAC	5.82308	5.71109	0	0.111982	52	51	0	1	2.49382	3.82269	0	0.139978	0.0366176	18	9	0	12	0	0
ENST00000526054.5	chr8	597	-1	847	633	32	182	VPS28	TGA	TGAG	40.6496	40.2016	0.447929	0	363	359	4	0	47.9924	63.5097	13.9978	0	0	182	0	0	176	0	0
ENST00000398193.8	chr2	430	1	5380	5238	32	110	RGPD1	TAG	TAGA	22.7324	22.7324	0	0	203	203	0	0	4.22535	4.3399	0	0	0	39	2	0	33	0	0
ENST00000518467.1	chr8	334	1	543	198	74	271	PKIA	TAA	TAAC	3.35947	2.68757	0.447929	0.223964	30	24	4	2	6.18686	13.5736	6.05309	0.826437	0.0608856	30	5	0	24	0	0
ENST00000263196.12	chr22	19	-1	4393	1620	200	2573	DGCR2	TAG	TAGA	51.6238	41.6574	9.85444	0.111982	461	372	88	1	11.7514	25.7144	49.2722	0.0435221	0.00169251	48	18	0.111982	42	2.66624	0.103687
ENST00000302851.8	chr19	257	-1	4484	1428	191	2865	ZNF561	TAG	TAGC	19.9328	16.1254	3.24749	0.559911	178	144	29	5	4.44533	11.2923	17.0025	0.195431	0.0173066	21	44	0	15	0	0
ENST00000264963.8	chr2	466	-1	2352	1014	17	1321	LMAN2L	TGA	TGAG	24.972	24.8601	0	0.111982	223	222	0	1	10.6174	24.5168	0	0.0847708	0.00345766	27	15	0.111982	21	5.33249	0.217503
ENST00000457542.7	chr15	107	1	7137	4494	230	2413	MAPKBP1	TGA	TGAG	5.82308	5.26317	0.559911	0	52	47	5	0	0.8159	1.17115	2.4344	0	0	24	27	0	18	0	0
ENST00000315580.9	chr12	885	1	1599	1233	139	227	ARL6IP4	TGA	TGAG	22.6204	22.6204	0	0	202	202	0	0	14.1466	18.3458	0	0	0	216	2	0	210	0	0
ENST00000545668.5	chr12	245	1	3706	2880	74	752	DDX11	TGA	TGAA	21.5006	20.6047	0.783876	0.111982	192	184	7	1	5.80156	7.15442	10.5929	0.148913	0.0208141	84	3	0	78	0	0
ENST00000334126.11	chr11	762	-1	7915	7029	221	665	C2CD3	TGA	TGAC	21.8365	20.7167	1.11982	0	195	185	10	0	2.75888	2.94732	5.06707	0	0	126	8	0	120	0	0
ENST00000258494.14	chr12	715	-1	7383	2739	16	4628	ALDH1L2	TAG	TAGA	25.308	25.196	0	0.111982	226	225	0	1	3.42787	9.19898	0	0.0241967	0.00263037	147	105	0	141	0	0
ENST00000620676.6	chr1	150	1	16312	13134	161	3017	VPS13D	TGA	TGAA	39.4178	38.6339	0.783876	0	352	345	7	0	2.41649	2.94152	4.86879	0	0	75	58	0	69	0	0
ENST00000610872.1	chr11	862	1	2146	1539	194	413	KDM4D	TAA	TAAG	3.58343	3.02352	0.447929	0.111982	32	27	4	1	1.66982	1.9646	2.30891	0.271143	0.138015	87	5	0.111982	81	1.3825	0.703704
ENST00000269967.4	chr19	772	1	3284	999	133	2152	CCDC97	TGA	TGAT	32.9228	31.243	1.2318	0.447929	294	279	11	4	10.0252	31.2743	9.26169	0.208145	0.00665547	558	15	0.223964	552	0.405733	0.0129734
ENST00000587091.6	chrX	366	1	4083	1587	139	2357	SLC16A2	TAA	TAAT	29.2274	28.5555	0.559911	0.111982	261	255	5	1	7.15831	17.9934	4.02814	0.0475105	0.00264045	126	28	0	120	0	0
ENST00000346872.8	chr17	472	-1	9743	1497	180	8066	IKZF3	TGA	TGAA	6.49497	6.04704	0.335947	0.111982	58	54	3	1	0.666629	4.03944	1.86637	0.0138832	0.00343692	57	109	0	51	0	0
ENST00000335670.11	chr15	242	-1	10782	1539	78	9165	RORA	TAA	TAAA	2.01568	1.9037	0.111982	0	18	17	1	0	0.186949	1.23697	1.43567	0	0	24	194	0	18	0	0
ENST00000361265.8	chr14	69	-1	2524	1584	66	874	AJUBA	TGA	TGAG	6.04704	5.71109	0.223964	0.111982	54	51	2	1	2.39582	3.60549	3.3934	0.128126	0.0355364	153	11	0	147	0	0
ENST00000544040.6	chr12	55	-1	6537	5706	249	582	CHD4	TGA	TGAA	452.184	445.241	6.60695	0.335947	4038	3976	59	3	69.1731	78.0304	26.5339	0.577228	0.00739748	123	9	0.335947	117	2.87134	0.0367977
ENST00000371120.7	chr1	697	1	2845	1344	153	1348	ATG4C	TAA	TAAA	54.3114	46.1367	8.1747	0	485	412	73	0	19.0901	34.3279	53.4294	0	0	54	26	0	48	0	0
ENST00000329146.8	chr14	549	1	1812	594	707	511	CRIP2	TAG	TAGG	2.68757	2.68757	0	0	24	24	0	0	1.48321	4.52454	0	0	0	213	5	0	207	0	0
ENST00000272879.9	chr2	883	1	2028	1533	178	317	CASP10	TAG	TAGT	13.7738	11.4222	2.35163	0	123	102	21	0	6.79182	7.45087	13.2114	0	0	48	5	0	42	0	0
ENST00000382125.8	chr2	9	-1	1721	1131	187	403	EIPR1	TGA	TGAC	12.542	10.7503	1.34379	0.447929	112	96	12	4	7.28763	9.50512	7.18603	1.11149	0.116935	240	2	0.447929	234	1.91423	0.201389
ENST00000321117.9	chr2	90	-1	4234	2706	231	1297	DNMT3A	TAA	TAAG	12.654	12.43	0.223964	0	113	111	2	0	2.98866	4.59351	0.969543	0	0	39	17	0	33	0	0
ENST00000217901.10	chrX	723	-1	1290	1149	43	98	IDH3G	TAG	TAGG	93.7291	92.9453	0.559911	0.223964	837	830	5	2	72.6582	80.8923	13.0212	2.28535	0.0282518	98	0	0.223964	92	2.4344	0.0300943
ENST00000263390.7	chr19	435	-1	3129	1770	257	1102	MED26	TGA	TGAC	12.43	12.318	0	0.111982	111	110	0	1	3.97252	6.95935	0	0.101617	0.0146016	255	9	0.111982	249	0.449728	0.0646221
ENST00000297313.8	chr8	254	1	2072	1134	99	839	RGS20	TAG	TAGG	1.34379	1.34379	0	0	12	12	0	0	0.648546	1.185	0	0	0	60	13	0	54	0	0
ENST00000375980.9	chr1	182	1	2377	690	78	1609	EFHD2	TAG	TAGC	24.972	23.9642	0.223964	0.783876	223	214	2	7	10.5057	34.7307	2.87134	0.487182	0.0140274	75	11	0.111982	69	1.62293	0.046729
ENST00000278422.9	chr11	426	1	1600	858	20	722	TMX2	TAA	TAAG	105.375	105.263	0.111982	0	941	940	1	0	65.8596	122.685	5.59911	0	0	54	21	0	48	0	0
ENST00000599218.6	chrX	219	-1	2750	1815	70	865	PRICKLE3	TGA	TGAA	13.8858	13.6618	0.223964	0	124	122	2	0	5.04938	7.52718	3.19949	0	0	48	12	0	42	0	0
ENST00000589703.5	chr19	838	-1	2364	2016	96	252	ZNF45	TAA	TAAA	4.03136	4.03136	0	0	36	36	0	0	1.70531	1.99968	0	0	0	168	4	0	162	0	0
ENST00000418543.8	chr19	336	1	1405	915	336	154	WDR83	TGA	TGAA	12.43	9.74246	2.68757	0	111	87	24	0	8.847	10.6475	7.99873	0	0	75	4	0	69	0	0
ENST00000626352.2	chr22	64	1	2580	1551	72	957	PPIL2	TAG	TAGA	64.9497	61.5902	2.91154	0.447929	580	550	25	4	25.1743	39.71	40.438	0.468055	0.0117868	60	13	0	54	0	0
ENST00000219091.8	chr16	129	1	1902	1632	118	152	ZNF205	TAG	TAGG	7.95074	7.83876	0.111982	0	71	70	1	0	4.1802	4.80316	0.949002	0	0	108	1	0	102	0	0
ENST00000375661.6	chr6	245	-1	813	255	203	355	LSM2	TGA	TGAT	69.429	58.5667	10.4143	0.447929	620	523	93	4	85.3985	229.673	51.3022	1.26177	0.00549377	39	4	0	33	0	0
ENST00000406341.5	chr3	21	1	6537	4296	184	2057	SETD5	TAG	TAGG	45.3528	36.6182	8.51065	0.223964	405	327	76	2	6.93786	8.52379	46.2535	0.108879	0.0127736	33	23	0	27	0	0
ENST00000216264.13	chr22	349	-1	4397	1581	98	2718	CERK	TGA	TGAG	14.5577	13.5499	0.223964	0.783876	130	121	2	7	3.31082	8.57043	2.28535	0.288402	0.0336508	48	32	0.223964	42	5.33249	0.622196
ENST00000355904.9	chr8	167	-1	1702	843	262	597	GTF2E2	TAG	TAGG	18.2531	17.0213	1.11982	0.111982	163	152	10	1	10.7245	20.1913	4.27413	0.187575	0.00928987	72	7	0	66	0	0
ENST00000522706.5	chr8	3	-1	1506	1005	30	471	ERICH1	TAA	TAAC	12.0941	11.9821	0.111982	0	108	107	1	0	8.0306	11.9225	3.73274	0	0	66	11	0	60	0	0
ENST00000648322.1	chr11	296	1	2244	1551	74	619	CAT	TGA	TGAG	63.046	61.8142	1.11982	0.111982	563	552	10	1	28.0954	39.8544	15.1327	0.180908	0.00453923	189	15	0.111982	183	0.611925	0.015354
ENST00000221573.11	chr19	222	1	1475	972	23	480	SNAPC2	TGA	TGAG	6.83092	6.83092	0	0	61	61	0	0	4.63113	7.02769	0	0	0	108	2	0	102	0	0
ENST00000216034.6	chr22	251	1	1986	396	16	1574	TOMM22	TAG	TAGA	164.502	163.382	0.223964	0.895858	1469	1459	2	8	82.8308	412.581	13.9978	0.56916	0.00137951	18	28	0.111982	12	9.33185	0.0226182
ENST00000367569.3	chr6	813	-1	648	228	70	350	SF3B5	TGA	TGAG	168.869	143.113	25.42	0.335947	1508	1278	227	3	260.601	627.69	363.142	0.959848	0.00152918	159	3	0.223964	153	1.46382	0.00233208
ENST00000330125.10	chr22	174	-1	3602	2925	170	507	EIF4ENIF1	TGA	TGAG	44.6809	44.233	0.447929	0	399	395	4	0	12.4045	15.1224	2.63488	0	0	168	6	0	162	0	0
ENST00000449105.8	chr2	192	-1	4099	1596	296	2207	HNRNPLL	TAA	TAAG	65.6216	62.0382	2.91154	0.671893	586	554	26	6	16.0092	38.871	9.83628	0.304437	0.00783199	111	64	0.671893	105	6.39899	0.164621
ENST00000434436.8	chr19	55	-1	5633	843	228	4562	MBD3	TAG	TAGG	23.5163	21.7246	1.00784	0.783876	210	194	9	7	4.17473	25.7705	4.42035	0.171827	0.00666759	72	41	0.111982	66	1.6967	0.0658388
ENST00000599522.6	chrX	247	1	2624	2241	189	194	MAGED4	TGA	TGAC	30.4592	29.7873	0.671893	0	272	266	6	0	11.6079	13.292	3.55499	0	0	111	1	0	105	0	0
ENST00000622669.4	chr3	791	1	2316	1512	74	730	MFSD1	TGA	TGAG	38.074	37.626	0	0.447929	340	336	0	4	16.4395	24.8849	0	0.613601	0.0246575	24	14	0.111982	18	6.22124	0.25
ENST00000595091.6	chr19	1119	1	4368	2880	213	1275	ZNF845	TAG	TAGA	14.2217	12.9899	1.11982	0.111982	127	116	10	1	3.25589	4.5104	5.25738	0.0878292	0.0194726	90	16	0.111982	84	1.33312	0.295567
ENST00000622845.5	chr6	845	-1	1295	807	143	345	RMND1	TGA	TGAT	23.5163	22.7324	0.559911	0.223964	210	203	5	2	18.1593	28.169	3.91546	0.649172	0.0230456	93	4	0.223964	87	2.5743	0.0913878
ENST00000261884.7	chr15	263	1	2000	1713	54	233	TRIP4	TGA	TGAC	23.9642	23.8522	0	0.111982	214	213	0	1	11.9821	13.9242	0	0.480611	0.0345161	93	2	0	87	0	0
ENST00000361720.10	chr1	342	-1	2080	1545	19	516	GPATCH3	TGA	TGAC	10.7503	9.85444	0.895858	0	96	88	8	0	5.16841	6.37828	47.1504	0	0	33	3	0	27	0	0
ENST00000231887.8	chr3	889	-1	3756	2139	21	1596	EHHADH	TGA	TGAT	15.4536	15.3416	0	0.111982	138	137	0	1	4.11436	7.17231	0	0.0701643	0.00978267	42	47	0.111982	36	3.11062	0.433698
ENST00000290795.7	chr1	586	-1	3554	1392	1216	946	GPBP1L1	TAG	TAGG	41.4334	5.0392	36.3942	0	370	45	325	0	11.6583	3.62012	29.9295	0	0	36	19	0	30	0	0
ENST00000315091.7	chr1	126	1	1790	855	6	929	TARDBP	TAA	TAAA	180.291	179.955	0	0.335947	1610	1607	0	3	100.721	210.474	0	0.361622	0.00171813	177	16	0.335947	171	1.9646	0.00933416
ENST00000415083.7	chr18	82	-1	3357	1224	38	2095	SS18	TGA	TGAA	99.6642	98.6564	0.671893	0.335947	890	881	6	3	29.6885	80.6016	17.6814	0.160356	0.00198949	36	34	0.223964	30	7.46548	0.092622
ENST00000372480.1	chr9	550	1	807	639	146	22	NTMT1	TGA	TGAG	74.2442	70.5488	3.69541	0	663	630	33	0	92.0003	110.405	25.3111	0	0	24	1	0	18	0	0
ENST00000396153.7	chr1	621	-1	6776	1920	450	4406	FAF1	TAA	TAAA	83.0908	76.1479	6.9429	0	742	680	62	0	12.2625	39.6604	15.4287	0	0	264	63	0	258	0	0
ENST00000204679.9	chr16	52	1	1930	885	29	1016	GNPTG	TGA	TGAC	4.36731	4.36731	0	0	39	39	0	0	2.26285	4.93481	0	0	0	135	12	0	129	0	0
ENST00000216237.10	chr22	281	1	3144	2085	45	1014	L3MBTL2	TGA	TGAG	81.747	79.2834	2.35163	0.111982	730	708	21	1	26.001	38.0256	52.2584	0.110436	0.00290426	111	14	0.111982	105	1.0665	0.0280468
ENST00000252622.15	chr19	77	-1	446	279	14	153	LSM7	TAG	TAGC	111.086	110.862	0.223964	0	992	990	2	0	249.073	397.356	15.9975	0	0	120	3	0	114	0	0
ENST00000625837.2	chrX	151	1	3192	2169	899	124	DDX3X	TGA	TGAG	619.15	609.295	9.85444	0	5529	5441	88	0	193.969	280.911	10.9616	0	0	42	3	0	36	0	0
ENST00000337137.9	chr22	350	1	3713	1521	131	2061	TBC1D22A	TGA	TGAG	11.0862	10.4143	0.671893	0	99	93	6	0	2.98579	6.84704	5.12896	0	0	78	22	0	72	0	0
ENST00000263593.7	chr11	1070	-1	5538	1539	167	3832	SIAE	TGA	TGAC	18.0291	17.9172	0	0.111982	161	160	0	1	3.25553	11.6421	0	0.0292229	0.00251011	60	82	0	54	0	0
ENST00000245544.9	chr17	919	1	2088	1938	77	73	NUP85	TGA	TGAG	96.0808	94.849	1.11982	0.111982	858	847	10	1	46.0157	48.9417	14.5431	1.534	0.0313435	42	2	0.111982	36	3.11062	0.0635577
ENST00000342192.8	chr22	60	1	2983	432	192	2359	UBE2L3	TAA	TAAA	146.585	143.001	0.223964	3.35947	1309	1277	2	30	49.14	331.022	1.16648	1.42411	0.00430216	90	23	2.57559	84	30.6618	0.0926278
ENST00000331134.11	chr17	1014	-1	4336	1794	176	2366	NPLOC4	TAG	TAGG	54.7593	53.0796	1.00784	0.671893	489	474	9	6	12.629	29.5873	5.72636	0.283979	0.009598	141	21	0	135	0	0
ENST00000333213.11	chr17	927	1	1892	1548	27	317	TSEN54	TGA	TGAC	22.7324	22.6204	0	0.111982	203	202	0	1	12.015	14.6127	0	0.353256	0.0241747	102	3	0.111982	96	1.16648	0.0798267
ENST00000269122.7	chr17	796	1	7715	4995	268	2452	CLTC	TGA	TGAG	1091.27	1076.37	13.9978	0.895858	9745	9612	125	8	141.447	215.49	52.2305	0.365358	0.00169547	21	46	0.111982	15	7.46548	0.0346442
ENST00000307961.11	chr15	292	-1	2696	1251	59	1386	RPL4	TAA	TAAA	1588.58	1583.54	2.46361	2.57559	14185	14140	22	23	589.236	1265.82	41.7561	1.85829	0.00146805	60	26	2.46361	54	45.6224	0.0360418
ENST00000579512.2	chr1	1040	-1	1087	279	73	735	HIST2H4B	TAG	TAGG	2081.53	2073.02	7.61479	0.895858	18588	18512	67	8	1914.93	7430.16	104.312	1.21885	0.000164041	69	9	0.895858	63	14.22	0.00191382
ENST00000545891.5	chr12	902	-1	1745	912	217	616	CCDC92	TGA	TGAA	2.35163	1.9037	0.447929	0	21	17	4	0	1.34764	2.08739	2.06419	0	0	303	5	0	297	0	0
ENST00000276055.3	chrX	167	1	2244	1428	142	674	CHST7	TAG	TAGC	3.47145	2.91154	0.223964	0.335947	31	26	2	3	1.54699	2.03889	1.57721	0.498437	0.244465	210	11	0.335947	204	1.6468	0.807692
ENST00000371281.4	chr1	666	1	2311	1131	42	1138	TTC4	TGA	TGAC	72.4525	67.4133	0.335947	4.70325	647	602	3	42	31.3512	59.6051	7.99873	4.13291	0.0693383	285	17	4.03136	279	14.4493	0.242418
ENST00000395686.8	chr14	216	-1	5094	1374	71	3649	ERO1A	TAA	TAAA	57.3349	55.2072	1.56775	0.559911	512	493	14	5	11.2554	40.1799	22.081	0.153442	0.00381888	72	62	0.447929	66	6.7868	0.16891
ENST00000361972.8	chr10	33	-1	7877	2652	85	5140	SFMBT2	TGA	TGAG	12.0941	11.1982	0.895858	0	108	100	8	0	1.53537	4.22256	10.5395	0	0	159	73	0	153	0	0
ENST00000377604.8	chrX	173	1	3352	2760	384	208	RBM10	TGA	TGAG	103.248	88.6899	14.4457	0.111982	922	792	129	1	30.8018	32.134	37.619	0.538376	0.0167541	129	2	0.111982	123	0.910425	0.0283321
ENST00000342665.4	chr20	7	1	4585	915	324	3346	SOX12	TGA	TGAG	26.7638	22.6204	3.58343	0.559911	239	202	32	5	5.83724	24.7218	11.06	0.167337	0.00676883	498	31	0.335947	492	0.682819	0.0276201
ENST00000371933.8	chr1	604	-1	5772	1455	1021	3296	EFCAB14	TAG	TAGC	8.62263	5.26317	2.91154	0.447929	77	47	26	4	1.49387	3.6173	2.85165	0.135901	0.0375697	87	60	0.111982	81	1.3825	0.382191
ENST00000339728.6	chr2	1094	-1	3821	573	489	2759	ARL4C	TGA	TGAT	4.03136	1.9037	2.01568	0.111982	36	17	18	1	1.05505	3.32234	4.12205	0.040588	0.0122167	351	39	0	345	0	0
ENST00000343380.6	chr20	193	-1	2645	1281	115	1249	E2F1	TGA	TGAC	5.82308	4.92722	0.559911	0.335947	52	44	5	3	2.20154	3.84638	4.86879	0.268973	0.0699287	171	15	0.111982	165	0.67868	0.176446
ENST00000396444.7	chr15	186	1	18981	3324	332	15325	USP8	TAA	TAAG	33.7067	30.6831	2.91154	0.111982	301	274	26	1	1.77581	9.23079	8.76969	0.00730716	0.000791608	33	310	0	27	0	0
ENST00000375749.8	chr20	175	1	5181	1134	56	3991	POFUT1	TGA	TGAT	40.7615	40.3136	0	0.447929	364	360	0	4	7.8675	35.5499	0	0.112235	0.0031571	27	53	0.111982	21	5.33249	0.15
ENST00000370867.8	chr1	739	1	3392	747	87	2558	TYW3	TAA	TAAG	40.7615	32.9228	7.39083	0.447929	364	294	66	4	12.017	44.0733	84.9521	0.175109	0.00397313	84	59	0.111982	78	1.43567	0.0325746
ENST00000316999.9	chr6	537	1	2358	1290	242	826	SMAP1	TGA	TGAA	61.3663	60.2464	0.895858	0.223964	548	538	8	2	26.0247	46.7027	3.70189	0.271143	0.00580574	51	13	0	45	0	0
ENST00000375754.9	chr9	289	1	4928	1875	110	2943	SYK	TAA	TAAC	8.8466	8.51065	0.223964	0.111982	79	76	2	1	1.79517	4.53901	2.03604	0.0380504	0.00838296	429	35	0	423	0	0
ENST00000338379.5	chr6	113	-1	673	591	37	45	HIST1H1T	TAA	TAAA	3.1355	3.1355	0	0	28	28	0	0	4.65899	5.30542	0	0	0	48	1	0	42	0	0
ENST00000325468.9	chr11	334	1	2477	2133	99	245	LARGE2	TGA	TGAG	3.1355	3.1355	0	0	28	28	0	0	1.26585	1.47	0	0	0	237	1	0	231	0	0
ENST00000521613.5	chr19	950	-1	1858	1431	289	138	CARD8	TAA	TAAA	10.0784	5.37515	4.59127	0.111982	90	48	41	1	5.42433	3.75622	15.8868	0.811466	0.216033	18	3	0	12	0	0
ENST00000524851.5	chr11	778	1	821	699	-1	123	RPS3	TAA	TAAC	3164.51	1512.43	1651.74	0.335947	28258	13505	14749	3	3854.45	2163.71	-1.65174e+06	2.73127	0.00126231	39	5	0.335947	33	10.1802	0.00470498
ENST00000369849.9	chr10	529	1	3206	1467	68	1671	INA	TAA	TAAT	20.3808	19.9328	0.335947	0.111982	182	178	3	1	6.35707	13.5875	4.94039	0.0670151	0.00493212	30	39	0.111982	24	4.66593	0.343399
ENST00000336440.3	chr14	310	-1	2981	984	1792	205	ZFP36L1	TAA	TAAG	19.3729	17.9172	1.45577	0	173	160	13	0	6.4988	18.2085	0.812371	0	0	27	6	0	21	0	0
ENST00000361464.8	chr10	501	-1	5129	2718	416	1995	OGA	TGA	TGAC	144.233	131.467	11.8701	0.895858	1288	1174	106	8	28.1211	48.3691	28.5339	0.449052	0.00928386	18	36	0.335947	12	27.9956	0.57879
ENST00000376741.5	chr17	683	1	2981	1809	45	1127	SP2	TAA	TAAG	15.5655	15.5655	0	0	139	139	0	0	5.22158	8.6045	0	0	0	333	16	0	327	0	0
ENST00000379487.5	chr13	105	1	2343	1098	159	1086	WBP4	TAG	TAGT	18.925	17.3572	1.56775	0	169	155	14	0	8.07725	15.8081	9.86007	0	0	114	22	0	108	0	0
ENST00000222247.10	chr19	470	1	589	498	41	50	RPL18A	TAG	TAGG	354.424	352.52	1.79172	0.111982	3165	3148	16	1	601.738	707.872	43.7004	2.23964	0.00316391	50	0	0.111982	44	2.54505	0.00359536
ENST00000393952.3	chr11	669	1	1505	1224	183	98	LRFN4	TAA	TAAG	2.35163	1.9037	0.447929	0	21	17	4	0	1.56254	1.55531	2.4477	0	0	98	0	0	92	0	0
ENST00000358933.10	chr16	579	1	4722	4173	204	345	EDC4	TAG	TAGC	157.895	153.976	3.91938	0	1410	1375	35	0	33.4382	36.8981	19.2126	0	0	39	5	0	33	0	0
ENST00000261023.8	chr2	821	1	6994	3114	277	3603	ITGAV	TAA	TAAC	60.9183	59.0146	1.67973	0.223964	544	527	15	2	8.71009	18.9514	6.06402	0.0621606	0.00328	30	105	0	24	0	0
ENST00000373237.4	chr1	450	-1	4381	573	88	3720	PSMB2	TAA	TAAC	368.646	348.377	17.8052	2.46361	3292	3111	158	22	84.1464	607.987	202.332	0.662261	0.00108927	42	68	1.11982	36	31.1062	0.0511625
ENST00000324324.12	chr15	170	-1	10092	1770	52	8270	MYEF2	TAA	TAAT	25.084	24.5241	0.111982	0.447929	224	219	1	4	2.48554	13.8554	2.1535	0.0541631	0.00390916	42	195	0	36	0	0
ENST00000323570.8	chr4	533	1	4354	849	116	3389	ELMOD2	TAA	TAAA	61.1423	59.3506	1.67973	0.111982	546	530	15	1	14.0428	69.9065	14.4805	0.0330429	0.000472672	78	67	0.111982	72	1.55531	0.0222484
ENST00000312431.10	chr6	519	-1	17711	16581	120	1010	DST	TAG	TAGT	58.0068	57.6709	0	0.335947	518	515	0	3	3.27519	3.47813	0	0.332621	0.095632	108	19	0.111982	102	1.09787	0.315648
ENST00000315286.13	chr17	639	-1	2069	642	17	1410	CCDC43	TAA	TAAC	35.1624	34.3786	0	0.783876	314	307	0	7	16.9949	53.5491	0	0.55594	0.0103819	282	25	0.447929	276	1.62293	0.0303073
ENST00000264071.7	chr19	183	-1	2232	1302	91	839	TUBB4A	TAG	TAGG	69.9889	69.7649	0.223964	0	625	623	2	0	31.357	53.5829	2.46115	0	0	42	18	0	36	0	0
ENST00000367600.5	chr1	1461	1	2474	1782	5	687	QSOX1	TGA	TGAA	39.8657	39.8657	0	0	356	356	0	0	16.1139	22.3713	0	0	0	306	5	0	300	0	0
ENST00000267485.7	chr14	245	-1	6450	2292	189	3969	ARMH4	TGA	TGAA	8.39867	8.39867	0	0	75	75	0	0	1.30212	3.66434	0	0	0	111	80	0	105	0	0
ENST00000369966.8	chr10	511	1	3150	2670	338	142	NFKB2	TGA	TGAC	15.7895	14.8936	0.895858	0	141	133	8	0	5.01254	5.57814	2.65047	0	0	72	1	0	66	0	0
ENST00000380338.9	chr9	65	-1	6679	1674	237	4768	MLLT3	TGA	TGAG	34.8265	28.2195	6.38299	0.223964	311	252	57	2	5.21433	16.8575	26.9324	0.0469724	0.00278643	96	102	0	90	0	0
ENST00000652032.1	chr3	801	-1	1595	963	563	69	B3GALNT1	TAA	TAAC	2.79956	2.23964	0.559911	0	25	20	5	0	1.75521	2.3257	0.994514	0	0	24	3	0	18	0	0
ENST00000561553.5	chr16	274	1	1370	1206	47	117	UQCRC2	TGA	TGAA	367.75	361.367	6.27101	0.111982	3284	3227	56	1	268.43	299.641	133.426	0.957113	0.0031942	33	4	0	27	0	0
ENST00000539517.7	chr14	129	-1	6945	1491	591	4863	NOVA1	TGA	TGAG	9.29453	7.83876	1.34379	0.111982	83	70	12	1	1.3383	5.25738	2.27375	0.0230274	0.00438001	30	89	0	24	0	0
ENST00000236192.12	chr1	1416	-1	4932	393	199	4340	VAMP4	TGA	TGAT	6.71893	5.93506	0.671893	0.111982	60	53	6	1	1.36231	15.1019	3.37635	0.0258024	0.00170855	24	106	0	18	0	0
ENST00000405808.5	chr2	242	-1	254	141	5	108	FBXO11	TAA	TAAA	5.15118	5.0392	0.111982	0	46	45	1	0	20.2802	35.739	22.3964	0	0	36	3	0	30	0	0
ENST00000375440.9	chr13	282	1	5776	2247	9	3520	CUL4A	TGA	TGAC	43.0012	42.6652	0	0.335947	384	381	0	3	7.4448	18.9876	0	0.0954394	0.0050264	36	85	0.335947	30	11.1982	0.589764
ENST00000428559.7	chr12	188	1	1599	924	46	629	DERA	TAA	TAAA	21.5006	21.5006	0	0	192	192	0	0	13.4463	23.269	0	0	0	69	12	0	63	0	0
ENST00000541412.5	chr6	47	1	1132	306	379	447	TMEM14C	TAG	TAGC	100.896	81.0751	18.0291	1.79172	901	724	161	16	89.1307	264.951	47.5703	4.00831	0.0151285	27	14	0.223964	21	10.665	0.0402526
ENST00000379341.9	chrX	101	1	911	783	72	56	PRDX4	TGA	TGAG	342.442	338.746	2.68757	1.00784	3058	3025	24	9	375.896	432.626	37.3274	17.9971	0.0415998	42	1	1.00784	36	27.9956	0.0647107
ENST00000543693.5	chr9	44	-1	7577	897	332	6348	NFIB	TGA	TGAG	8.39867	6.71893	1.56775	0.111982	75	60	14	1	1.10844	7.49045	4.72214	0.0176406	0.00235507	48	113	0	42	0	0
ENST00000334186.9	chr19	996	1	4538	3552	188	798	PPFIA3	TAG	TAGT	16.6854	15.0056	0.223964	1.45577	149	134	2	13	3.67681	4.22456	1.1913	1.82427	0.431826	282	3	0.783876	276	2.84013	0.672291
ENST00000294016.8	chr16	150	-1	7935	4029	790	3116	ADCY9	TGA	TGAG	25.9799	23.8522	2.12766	0	232	213	19	0	3.27409	5.92013	2.69324	0	0	132	36	0	126	0	0
ENST00000361439.9	chr16	307	-1	997	768	72	157	NSMCE1	TAG	TAGC	40.7615	39.6417	1.00784	0.111982	364	354	9	1	40.8842	51.6168	13.9978	0.713263	0.0138184	114	2	0.111982	108	1.03687	0.0200879
ENST00000287322.5	chr8	195	1	4152	1341	9	2802	BAG4	TGA	TGAA	39.1938	38.4099	0.335947	0.447929	350	343	3	4	9.43974	28.6427	37.3274	0.15986	0.00558119	39	79	0.111982	33	3.3934	0.118473
ENST00000253024.10	chr19	1279	1	3319	2475	688	156	TRIM28	TGA	TGAG	957	890.707	65.9575	0.335947	8546	7954	589	3	288.34	359.882	95.8685	2.1535	0.00598393	156	0	0.335947	150	2.23964	0.00622328
ENST00000297375.4	chr7	810	1	3350	969	243	2138	EN2	TAG	TAGG	14.3337	12.2061	1.9037	0.223964	128	109	17	2	4.27872	12.5966	7.83415	0.104754	0.0083161	63	25	0	57	0	0
ENST00000359393.6	chr11	590	-1	3573	1572	405	1596	EHD1	TGA	TGAT	49.9441	49.6081	0.111982	0.223964	446	443	1	2	13.9782	31.5573	0.276499	0.140329	0.00444678	231	14	0.223964	225	0.995398	0.0315425
ENST00000381031.8	chr22	345	1	2521	1377	26	1118	TTC38	TGA	TGAG	42.8892	42.1053	0.671893	0.111982	383	376	6	1	17.0128	30.5776	25.8421	0.100163	0.0032757	108	14	0	102	0	0
ENST00000424358.1	chr20	213	-1	822	183	81	558	MMP24OS	TGA	TGAC	5.93506	3.8074	1.11982	1.00784	53	34	10	9	7.22027	20.8054	13.825	1.80617	0.0868121	345	2	1.00784	339	2.97298	0.142894
ENST00000644386.1	chr20	367	-1	1153	303	81	769	ADNP	TAA	TAAA	6.49497	4.59127	1.79172	0.111982	58	41	16	1	5.63311	15.1527	22.12	0.145621	0.0096102	57	14	0	51	0	0
ENST00000565874.5	chr16	492	1	1931	1614	186	131	CPNE2	TGA	TGAG	5.0392	5.0392	0	0	45	45	0	0	2.60963	3.12218	0	0	0	131	0	0	125	0	0
ENST00000342679.8	chr17	300	1	2258	1011	243	1004	MAP2K3	TAG	TAGG	25.532	19.9328	5.37515	0.223964	228	178	48	2	11.3073	19.716	22.12	0.223072	0.0113143	483	6	0.223964	477	0.469527	0.0238146
ENST00000407461.5	chr22	289	-1	757	582	110	65	POLR3H	TAG	TAGC	25.8679	25.42	0.335947	0.111982	231	227	3	1	34.1716	43.6769	3.05406	1.7228	0.0394443	65	0	0	59	0	0
ENST00000335870.6	chr7	761	1	2765	1455	122	1188	ZNF212	TAA	TAAG	13.6618	12.654	0.559911	0.447929	122	113	5	4	4.94099	8.6969	4.58944	0.377045	0.0433539	282	12	0.447929	276	1.62293	0.18661
ENST00000204961.5	chrX	315	1	3258	1008	750	1500	EFNB1	TGA	TGAG	15.9015	9.40651	6.49497	0	142	84	58	0	4.88075	9.33185	8.65996	0	0	108	14	0	102	0	0
ENST00000344417.10	chr7	56	1	2133	1317	257	559	C7orf26	TAG	TAGG	10.1904	8.39867	1.56775	0.223964	91	75	14	2	4.77749	6.37712	6.1002	0.400652	0.0628265	174	7	0.111982	168	0.666561	0.104524
ENST00000267163.5	chr13	145	1	4748	2754	181	1813	RB1	TGA	TGAG	99.3283	96.8646	2.46361	0	887	865	22	0	20.92	35.1723	13.6111	0	0	63	48	0	57	0	0
ENST00000262241.7	chr14	509	1	5706	1425	232	4049	RCOR1	TGA	TGAG	34.6025	32.1389	2.35163	0.111982	309	287	21	1	6.06423	22.5536	10.1363	0.0276568	0.00122627	483	68	0	477	0	0
ENST00000369250.7	chr10	579	1	2825	2184	329	312	FAM160B1	TAA	TAAG	18.1411	17.4692	0.671893	0	162	156	6	0	6.42164	7.99873	2.04223	0	0	132	2	0	126	0	0
ENST00000372853.8	chr9	528	1	2605	273	56	2276	URM1	TGA	TGAG	42.7772	41.9933	0	0.783876	382	375	0	7	16.4212	153.822	0	0.344409	0.00223902	30	30	0.223964	24	9.33185	0.0606667
ENST00000393829.6	chr17	576	1	2983	2463	161	359	ATP6V0A1	TGA	TGAG	113.102	111.646	1.2318	0.223964	1010	997	11	2	37.9155	45.3294	7.65096	0.623857	0.0137627	138	6	0.111982	132	0.84835	0.0187152
ENST00000370950.7	chr1	729	1	3739	1422	76	2241	SRSF11	TGA	TGAA	157.447	153.64	3.58343	0.223964	1406	1372	32	2	42.1094	108.045	47.1504	0.0999395	0.000924983	66	61	0	60	0	0
ENST00000651699.1	chr5	474	-1	1870	1107	146	617	TMEM173	TGA	TGAG	1.11982	1.11982	0	0	10	10	0	0	0.598836	1.01158	0	0	0	141	7	0	135	0	0
ENST00000302550.16	chr1	1822	1	3972	552	182	3238	DESI2	TAA	TAAA	22.6204	17.4692	3.1355	2.01568	202	156	28	18	5.69497	31.6472	17.228	0.622508	0.0196703	63	65	0.447929	57	7.8584	0.248313
ENST00000206595.11	chr14	132	1	5725	2088	113	3524	G2E3	TAA	TAAA	81.2991	77.1558	3.91938	0.223964	726	689	35	2	14.2007	36.952	34.6848	0.0635541	0.00171991	33	76	0	27	0	0
ENST00000272793.9	chr2	749	1	7960	5634	44	2282	UBR3	TGA	TGAC	71.3327	70.7728	0.223964	0.335947	637	632	2	3	8.96139	12.5617	5.0901	0.147216	0.0117194	69	69	0.335947	63	5.33249	0.424503
ENST00000370503.2	chrX	658	-1	545	393	78	74	SPANXN3	TAG	TAGT	0.783876	0.783876	0	0	7	7	0	0	1.4383	1.99459	0	0	0	42	4	0	36	0	0
ENST00000233121.6	chr2	108	1	1847	813	192	842	MAPRE3	TGA	TGAG	10.1904	10.1904	0	0	91	91	0	0	5.51726	12.5343	0	0	0	336	6	0	330	0	0
ENST00000366582.8	chr1	1798	-1	8414	6402	121	1891	HEATR1	TAA	TAAG	462.599	454.76	7.61479	0.223964	4131	4061	67	2	54.9796	71.034	62.9322	0.118437	0.00166733	174	36	0.111982	168	0.666561	0.00938368
ENST00000301459.5	chr11	560	-1	2870	1539	702	629	RCOR2	TGA	TGAG	3.69541	2.57559	1.00784	0.111982	33	23	9	1	1.2876	1.67355	1.43567	0.178032	0.10638	114	7	0.111982	108	1.03687	0.619565
ENST00000339394.7	chr1	388	-1	5201	1296	166	3739	SDC3	TAG	TAGT	10.0784	9.51849	0	0.559911	90	85	0	5	1.93778	7.34451	0	0.149749	0.0203892	336	37	0.335947	330	1.01802	0.13861
ENST00000452020.5	chr3	99	-1	1117	846	181	90	SGO1	TAA	TAAA	25.9799	22.2845	3.69541	0	232	199	33	0	23.2586	26.341	20.4167	0	0	24	1	0	18	0	0
ENST00000326019.10	chr2	142	1	2914	2358	276	280	SLC4A1AP	TGA	TGAT	75.3641	74.8041	0.559911	0	673	668	5	0	25.8627	31.7236	2.02866	0	0	60	7	0	54	0	0
ENST00000503585.6	chr4	118	1	6264	714	340	5210	PACRGL	TGA	TGAA	9.63047	6.9429	1.79172	0.895858	86	62	16	8	1.53743	9.72395	5.26975	0.17195	0.0176831	39	103	0	33	0	0
ENST00000426196.6	chrX	204	1	4073	3615	281	177	HDAC6	TAA	TAAG	28.2195	27.8836	0.223964	0.111982	252	249	2	1	6.92844	7.7133	0.797027	0.632668	0.082023	81	5	0.111982	75	1.4931	0.193574
ENST00000260762.10	chr10	406	1	3519	2382	8	1129	EXOC6	TAG	TAGA	50.728	50.616	0	0.111982	453	452	0	1	14.4154	21.2494	0	0.0991871	0.00466777	39	24	0	33	0	0
ENST00000338779.11	chr16	622	-1	4934	2211	256	2467	MTSS1L	TGA	TGAT	17.9172	16.7973	0.895858	0.223964	160	150	8	2	3.63137	7.59717	3.49945	0.0907841	0.0119497	174	32	0	168	0	0
ENST00000558984.1	chr14	222	-1	1660	1194	181	285	BMP4	TGA	TGAG	11.1982	7.95074	3.1355	0.111982	100	71	28	1	6.74592	6.65891	17.3232	0.39292	0.0590067	132	4	0.111982	126	0.888748	0.133467
ENST00000515669.5	chr5	321	1	1528	588	258	682	C5orf30	TGA	TGAA	12.654	8.95858	3.58343	0.111982	113	80	32	1	8.28141	15.2357	13.8893	0.164197	0.0107771	30	23	0.111982	24	4.66593	0.30625
ENST00000448372.5	chr12	295	-1	4634	1902	390	2342	SENP1	TGA	TGAA	32.3629	31.0191	1.34379	0	289	277	12	0	6.98379	16.3087	3.44561	0	0	210	30	0	204	0	0
ENST00000616640.1	chr10	66	1	1492	819	591	82	RPP38	TAA	TAAT	20.8287	16.5734	4.25533	0	186	148	38	0	13.9603	20.2361	7.20021	0	0	75	1	0	69	0	0
ENST00000258742.10	chr7	111	1	1526	1239	32	255	NUPL2	TAA	TAAA	51.7358	51.2879	0.335947	0.111982	462	458	3	1	33.9029	41.3946	10.4983	0.439146	0.0106088	30	5	0	24	0	0
ENST00000304735.4	chr16	154	1	2771	1989	149	633	VASN	TAA	TAAG	3.1355	3.1355	0	0	28	28	0	0	1.13154	1.57642	0	0	0	45	8	0	39	0	0
ENST00000418929.7	chr19	1015	1	7371	6078	467	826	PRR12	TGA	TGAC	28.7794	26.5398	2.01568	0.223964	257	237	18	2	3.90441	4.36653	4.31623	0.271143	0.0620958	18	2	0	12	0	0
ENST00000395347.1	chr10	223	-1	3601	1497	103	2001	SLC16A9	TAG	TAGA	7.72678	7.50281	0.111982	0.111982	69	67	1	1	2.14573	5.0119	1.08721	0.0559631	0.0111661	120	38	0.111982	114	0.9823	0.195994
ENST00000306315.9	chr5	372	-1	5913	4506	430	977	ZNF608	TAA	TAAC	10.3024	9.96642	0.335947	0	92	89	3	0	1.74232	2.21181	0.781272	0	0	129	22	0	123	0	0
ENST00000369755.4	chr10	540	1	7782	3675	600	3507	SLK	TAA	TAAC	146.361	142.665	3.47145	0.223964	1307	1274	31	2	18.8076	38.8205	5.78575	0.0638621	0.00164506	183	67	0.111982	177	0.632668	0.0162973
ENST00000295522.4	chr3	920	-1	3401	603	234	2564	CLDN1	TGA	TGAC	1.2318	1.11982	0.111982	0	11	10	1	0	0.362189	1.85709	0.478557	0	0	30	45	0	24	0	0
ENST00000561208.6	chr15	59	-1	5441	1401	1077	2963	MEIS2	TAG	TAGT	17.9172	13.4379	4.25533	0.223964	160	120	38	2	3.29299	9.59163	3.95109	0.0755871	0.00788053	48	64	0	42	0	0
ENST00000394975.3	chr16	402	-1	795	459	62	274	VKORC1	TGA	TGAG	78.6115	72.9004	3.02352	2.68757	702	651	27	24	98.8824	158.824	48.7665	9.80866	0.0617579	93	4	1.9037	87	21.8816	0.137772
ENST00000445224.6	chr3	792	1	1600	702	318	580	SCHIP1	TGA	TGAA	7.61479	7.27885	0.223964	0.111982	68	65	2	1	4.75925	10.3687	0.704291	0.193073	0.0186207	57	12	0.111982	51	2.19573	0.211765
ENST00000464873.5	chr3	628	-1	2081	915	745	421	RUVBL1	TGA	TGAC	216.238	210.191	5.59911	0.447929	1931	1877	50	4	103.91	229.717	7.51559	1.06396	0.00463164	78	4	0.111982	72	1.55531	0.00677056
ENST00000409817.1	chr2	659	-1	1850	1038	298	514	CXCR4	TAA	TAAC	7.39083	7.16686	0	0.223964	66	64	0	2	3.99504	6.90449	0	0.435729	0.063108	33	19	0	27	0	0
ENST00000249442.11	chr2	790	1	1296	759	182	355	MTX2	TAG	TAGA	53.9754	43.1132	10.7503	0.111982	482	385	96	1	41.6477	56.8026	59.0676	0.315443	0.00555332	51	9	0	45	0	0
ENST00000317483.4	chr6	524	-1	2501	681	148	1672	RAB23	TAA	TAAG	11.0862	10.0784	0.559911	0.447929	99	90	5	4	4.43272	14.7994	3.78318	0.2679	0.0181021	207	28	0.111982	201	0.557126	0.0376451
ENST00000344337.11	chr3	583	-1	6843	1584	182	5077	KPNA1	TGA	TGAA	134.491	131.803	2.23964	0.447929	1201	1177	20	4	19.6538	83.209	12.3057	0.0882271	0.00106031	210	99	0.447929	204	2.19573	0.0263881
ENST00000273308.9	chr12	487	-1	1405	516	187	702	CNPY2	TGA	TGAA	72.5645	50.392	21.9485	0.223964	648	450	196	2	51.6473	97.6589	117.372	0.319038	0.00326686	99	16	0.223964	93	2.40822	0.0246595
ENST00000010132.6	chr12	35	1	1795	1530	136	129	DYRK4	TGA	TGAC	23.4043	23.2923	0	0.111982	209	208	0	1	13.0386	15.2237	0	0.868079	0.0570215	39	2	0	33	0	0
ENST00000570016.5	chr16	349	-1	1301	609	237	455	CDIPT	TGA	TGAC	39.8657	22.0605	16.2374	1.56775	356	197	145	14	30.6423	36.2241	68.5123	3.44561	0.0951191	306	2	1.56775	300	5.22584	0.144264
ENST00000433867.5	chr19	918	-1	3276	2604	472	200	PRKD2	TGA	TGAG	26.6518	21.8365	4.70325	0.111982	238	195	42	1	8.13546	8.38577	9.96452	0.559911	0.0667692	63	2	0	57	0	0
ENST00000406606.7	chr9	612	-1	4646	2487	-3	2162	VAV2	TGA	TGAC	29.0034	14.3337	14.5577	0.111982	259	128	130	1	6.24266	5.76346	-4852.56	0.0517957	0.0089869	57	18	0.111982	51	2.19573	0.380974
ENST00000373795.7	chr1	383	-1	2255	1452	142	661	SRSF4	TAA	TAAC	113.326	110.974	1.56775	0.783876	1012	991	14	7	50.2554	76.4287	11.0405	1.18589	0.0155163	105	13	0.335947	99	3.3934	0.0443996
ENST00000354287.5	chr1	134	-1	1242	858	83	301	FBXO2	TGA	TGAG	1.00784	0.895858	0.111982	0	9	8	1	0	0.811466	1.04412	1.34918	0	0	66	8	0	60	0	0
ENST00000259324.5	chr9	540	1	4574	2400	517	1657	LRRC8A	TGA	TGAG	22.3964	21.6126	0.783876	0	200	193	7	0	4.89647	9.00524	1.5162	0	0	138	11	0	132	0	0
ENST00000409599.5	chr2	513	1	3809	1593	350	1866	IL18R1	TAA	TAAT	2.91154	2.46361	0.447929	0	26	22	4	0	0.764384	1.54652	1.2798	0	0	51	37	0	45	0	0
ENST00000422959.6	chr7	345	1	3480	2223	196	1061	PHTF2	TGA	TGAC	34.4905	31.579	2.68757	0.223964	308	282	24	2	9.91107	14.2056	13.7121	0.211088	0.0148595	24	26	0	18	0	0
ENST00000269571.9	chr17	469	1	4500	3735	153	612	ERBB2	TGA	TGAA	27.5476	26.2038	1.34379	0	246	234	12	0	6.1217	7.01576	8.78292	0	0	30	5	0	24	0	0
ENST00000379818.4	chr16	480	1	353	153	67	133	MT1M	TGA	TGAT	0.895858	0.895858	0	0	8	8	0	0	2.53784	5.85528	0	0	0	30	4	0	24	0	0
ENST00000569847.1	chr16	251	-1	1785	1179	520	86	GPRC5B	TGA	TGAA	10.3024	10.3024	0	0	92	92	0	0	5.77163	8.73822	0	0	0	86	0	0	80	0	0
ENST00000381259.5	chr12	238	1	2289	1293	10	986	CCDC91	TAA	TAAA	17.9172	17.8052	0.111982	0	160	159	1	0	7.82751	13.7704	11.1982	0	0	147	22	0	141	0	0
ENST00000264108.5	chr2	761	1	1589	1227	34	328	HAT1	TAA	TAAA	318.813	317.47	0.783876	0.559911	2847	2835	7	5	200.638	258.736	23.0552	1.70705	0.00659763	123	9	0.559911	117	4.78557	0.0184959
ENST00000652680.1	chr6	451	1	1953	1338	203	412	SLC29A1	TGA	TGAC	102.8	101.232	1.11982	0.447929	918	904	10	4	52.6368	75.6592	5.51637	1.08721	0.0143698	72	4	0.335947	66	5.0901	0.0672768
ENST00000278193.7	chr11	268	-1	4797	561	11	4225	LIN7C	TAA	TAAT	109.407	106.831	0.335947	2.23964	977	954	3	20	22.8073	190.43	30.5406	0.530093	0.00278367	66	98	1.11982	60	18.6637	0.0980084
ENST00000334304.10	chr4	120	-1	4532	3933	276	323	ADGRA3	TAA	TAAC	18.813	17.4692	1.34379	0	168	156	12	0	4.15115	4.44171	4.86879	0	0	18	7	0	12	0	0
ENST00000319023.6	chr11	725	1	2728	2088	182	458	NADSYN1	TGA	TGAG	20.1568	19.5969	0.559911	0	180	175	5	0	7.38886	9.38549	3.07644	0	0	78	6	0	72	0	0
ENST00000369314.2	chr1	1011	1	1133	624	114	395	POLR3GL	TGA	TGAA	9.29453	4.14334	5.0392	0.111982	83	37	45	1	8.20347	6.63997	44.2035	0.283499	0.0426959	33	6	0.111982	27	4.14749	0.624625
ENST00000256010.7	chr12	632	1	1194	480	103	611	NTS	TGA	TGAG	1.34379	1.11982	0.111982	0.111982	12	10	1	1	1.12545	2.33296	1.08721	0.183277	0.0785597	27	19	0	21	0	0
ENST00000305386.3	chr14	188	1	2642	1311	468	863	MGAT2	TGA	TGAA	44.009	28.4435	14.8936	0.671893	393	254	133	6	16.6575	21.696	31.824	0.778556	0.0358847	66	17	0.335947	60	5.59911	0.258071
ENST00000258111.5	chr12	587	1	4672	600	439	3633	KCNMB4	TAA	TAAA	4.92722	3.47145	1.34379	0.111982	44	31	12	1	1.05463	5.78575	3.06102	0.0308236	0.00532751	117	63	0	111	0	0
ENST00000263212.10	chr22	67	-1	5104	1332	111	3661	PPM1F	TAG	TAGG	35.4984	31.579	3.58343	0.335947	317	282	32	3	6.95501	23.708	32.2832	0.0917637	0.00387059	600	32	0.223964	594	0.377045	0.0159037
ENST00000344697.3	chr3	194	-1	2502	1710	343	449	POMGNT2	TAG	TAGC	12.9899	11.0862	1.79172	0.111982	116	99	16	1	5.19182	6.48318	5.22366	0.249404	0.0384693	291	3	0.111982	285	0.39292	0.0606061
ENST00000548985.1	chr12	344	1	632	141	263	228	COX14	TAG	TAGA	35.9463	29.0034	6.38299	0.559911	321	259	57	5	56.8771	205.698	24.2699	2.45575	0.0119386	90	5	0.111982	84	1.33312	0.00648097
ENST00000371141.8	chr20	404	1	4892	945	718	3229	STX16	TAA	TAAG	11.9821	6.27101	5.59911	0.111982	107	56	50	1	2.44933	6.63599	7.79821	0.0346802	0.00522608	156	61	0	150	0	0
ENST00000348335.6	chr17	56	-1	3518	1485	143	1890	CAMKK1	TGA	TGAG	8.73462	8.73462	0	0	78	78	0	0	2.48284	5.8819	0	0	0	555	19	0	549	0	0
ENST00000372422.7	chr6	438	-1	1462	1020	113	329	YIPF3	TGA	TGAC	54.6473	50.28	4.14334	0.223964	488	449	37	2	37.3785	49.2941	36.6668	0.680743	0.0138098	63	5	0.111982	57	1.9646	0.0398546
ENST00000288135.5	chr4	211	1	5141	2898	91	2152	KIT	TGA	TGAG	24.6361	24.6361	0	0	220	220	0	0	4.79208	8.50107	0	0	0	36	46	0	30	0	0
ENST00000325795.7	chr2	834	-1	2647	429	781	1437	ORMDL1	TGA	TGAA	20.8287	19.037	1.45577	0.335947	186	170	13	3	7.86879	44.3752	1.86398	0.233783	0.00526833	93	29	0.111982	87	1.28715	0.0290061
ENST00000296585.10	chr5	137	1	7798	3513	111	4174	ITGA2	TGA	TGAA	29.5633	29.0034	0.335947	0.223964	264	259	3	2	3.79114	8.25602	3.02655	0.053657	0.00649914	63	82	0.223964	57	3.9292	0.47592
ENST00000263663.10	chr2	30	1	2222	1734	62	426	TAF1B	TGA	TGAG	81.5231	80.2913	0.559911	0.671893	728	717	5	6	36.6891	46.3041	9.03083	1.57721	0.0340621	165	9	0.671893	159	4.22575	0.0912608
ENST00000382409.3	chr11	27	-1	2455	1665	479	311	DEAF1	TGA	TGAG	21.1646	20.9407	0.111982	0.111982	189	187	1	1	8.62104	12.577	0.233783	0.360072	0.0286294	75	3	0	69	0	0
ENST00000366996.1	chr1	1656	-1	1990	1080	810	100	LPGAT1	TAG	TAGG	23.0683	22.6204	0.335947	0.111982	206	202	3	1	11.5921	20.9448	0.414749	1.11982	0.0534653	54	1	0.111982	48	2.33296	0.111386
ENST00000367576.6	chr6	810	1	1808	1395	134	279	LTV1	TAG	TAGA	183.427	174.58	8.73462	0.111982	1638	1559	78	1	101.453	125.147	65.1837	0.40137	0.00320718	108	7	0.111982	102	1.09787	0.00877259
ENST00000291416.10	chr1	430	-1	3772	1395	605	1772	TRIM62	TAG	TAGT	9.29453	7.50281	1.79172	0	83	67	16	0	2.46408	5.37836	2.96151	0	0	144	20	0	138	0	0
ENST00000357077.9	chr4	467	1	14170	11841	70	2259	ANK2	TAA	TAAA	20.2688	20.2688	0	0	181	181	0	0	1.4304	1.71175	0	0	0	54	39	0	48	0	0
ENST00000507420.1	chr4	66	1	518	351	99	68	MRFAP1	TGA	TGAG	319.597	259.239	59.7985	0.559911	2854	2315	533	5	616.983	738.572	604.025	8.23399	0.0111485	68	0	0.447929	62	7.22466	0.00978193
ENST00000311915.12	chr12	551	-1	2653	1374	22	1257	C12orf66	TGA	TGAG	7.27885	7.16686	0.111982	0	65	64	1	0	2.74363	5.21606	5.0901	0	0	81	30	0	75	0	0
ENST00000394825.6	chr12	370	1	2440	1764	123	553	NR4A1	TGA	TGAC	1.9037	1.79172	0.111982	0	17	16	1	0	0.780204	1.01571	0.910425	0	0	99	8	0	93	0	0
ENST00000648613.1	chr10	574	-1	7298	2664	398	4236	CCDC186	TAA	TAAA	27.5476	24.7481	2.57559	0.223964	246	221	23	2	3.77468	9.28982	6.47134	0.0528717	0.00569136	21	86	0	15	0	0
ENST00000564138.6	chr16	682	1	8621	3765	175	4681	PLCG2	TAG	TAGA	17.2453	17.0213	0.223964	0	154	152	2	0	2.00038	4.52093	1.2798	0	0	57	87	0	51	0	0
ENST00000348956.7	chr14	518	-1	1375	1113	71	191	CKB	TGA	TGAA	1384.88	1372.9	5.48713	6.49497	12366	12259	48	58	1007.19	1233.52	77.2835	34.0051	0.0275676	156	2	6.27101	150	41.8067	0.0338923
ENST00000360409.7	chr2	908	1	6617	2763	785	3069	NRP2	TGA	TGAC	21.7246	18.701	2.68757	0.335947	194	167	24	3	3.28314	6.76838	3.42366	0.109465	0.0161729	186	51	0.335947	180	1.86637	0.275749
ENST00000369682.4	chrX	749	1	10840	5583	169	5088	PLXNA3	TAA	TAAG	7.50281	7.50281	0	0	67	67	0	0	0.692141	1.34387	0	0	0	396	58	0	390	0	0
ENST00000312037.6	chr5	581	-1	667	423	202	42	RPS14	TGA	TGAA	765.847	695.634	68.5331	1.67973	6838	6211	612	15	1148.2	1644.52	339.273	39.9937	0.0243193	42	0	1.67973	36	46.6593	0.0283725
ENST00000263033.9	chrX	413	-1	2290	1983	182	125	SYTL4	TGA	TGAG	9.63047	9.51849	0	0.111982	86	85	0	1	4.20545	4.80005	0	0.895858	0.186635	125	0	0.111982	119	0.941027	0.196045
ENST00000470557.2	chr17	797	-1	4069	507	3441	121	PTRH2	TAG	TAGG	50.616	46.6966	2.91154	1.00784	452	417	26	9	12.4394	92.1037	0.846131	8.32926	0.0904334	93	3	0.895858	87	10.2972	0.1118
ENST00000606911.6	chr1	1459	1	8659	1719	185	6755	TOR1AIP1	TAA	TAAG	83.5388	81.6351	1.34379	0.559911	746	729	12	5	9.64762	47.4899	7.26371	0.0828884	0.00174539	87	148	0.111982	81	1.3825	0.0291114
ENST00000481445.1	chrX	378	1	2426	210	110	2106	COX7B	TAA	TAAT	499.777	424.973	70.5488	4.25533	4462	3794	629	38	206.009	2023.68	641.353	2.02057	0.000998465	18	47	1.2318	12	102.65	0.0507246
ENST00000261438.10	chr4	143	1	5549	1005	296	4248	KLF3	TGA	TGAT	24.5241	21.3886	2.91154	0.223964	219	191	26	2	4.41956	21.2822	9.83628	0.0527223	0.0024773	27	86	0	21	0	0
ENST00000394089.6	chr17	487	1	1979	1356	524	99	RARA	TGA	TGAC	12.2061	7.16686	5.0392	0	109	64	45	0	6.16779	5.2853	9.6168	0	0	72	1	0	66	0	0
ENST00000294244.9	chr11	558	1	1909	1113	225	571	SPINDOC	TAA	TAAA	16.5734	16.1254	0.111982	0.335947	148	144	1	3	8.6817	14.4883	0.497699	0.588348	0.0406086	99	4	0.111982	93	1.20411	0.0831093
ENST00000357765.6	chr2	485	1	1098	747	146	205	UNC50	TAA	TAAA	33.3707	32.5868	0.447929	0.335947	298	291	4	3	30.3923	43.6236	3.06801	1.63876	0.037566	51	6	0.335947	45	7.46548	0.171134
ENST00000335016.9	chr4	331	1	3759	3453	160	146	BMP2K	TAG	TAGA	22.8444	22.2845	0.559911	0	204	199	5	0	6.07725	6.45365	3.49945	0	0	27	3	0	21	0	0
ENST00000395288.6	chr11	361	-1	2415	1524	165	726	KBTBD4	TAA	TAAG	23.5163	22.5084	1.00784	0	210	201	9	0	9.73759	14.7693	6.10812	0	0	198	14	0	192	0	0
ENST00000334220.9	chr14	366	1	2768	1329	32	1407	DLST	TAG	TAGG	104.367	103.696	0	0.671893	932	926	0	6	37.705	78.0253	0	0.477536	0.00612028	27	23	0.111982	21	5.33249	0.0683431
ENST00000396908.8	chr19	630	1	2104	1410	57	637	PROSER3	TGA	TGAA	9.40651	9.29453	0	0.111982	84	83	0	1	4.47077	6.59186	0	0.175796	0.0266687	408	5	0.111982	402	0.278563	0.0422586
ENST00000535902.6	chr12	157	-1	5487	1263	259	3965	MANSC1	TAA	TAAG	9.85444	9.29453	0.559911	0	88	83	5	0	1.79596	7.35909	2.16182	0	0	75	77	0	69	0	0
ENST00000393486.5	chr7	572	1	4348	708	379	3261	MDFIC	TAA	TAAA	5.37515	4.03136	1.2318	0.111982	48	36	11	1	1.23623	5.69401	3.25014	0.0343398	0.00603087	24	68	0	18	0	0
ENST00000261778.2	chr16	599	1	4848	3252	81	1515	TANGO6	TAG	TAGA	33.1467	32.8108	0.335947	0	296	293	3	0	6.8372	10.0894	4.14749	0	0	198	19	0	192	0	0
ENST00000506646.5	chr4	4	-1	890	366	153	371	ZNF721	TAG	TAGG	11.0862	4.36731	6.15902	0.559911	99	39	54	5	12.4565	11.9325	40.2551	1.50919	0.126477	36	9	0	30	0	0
ENST00000282878.6	chr5	166	1	8816	651	128	8037	RAB3C	TAG	TAGT	2.79956	2.46361	0.335947	0	25	22	3	0	0.317554	3.78435	2.62458	0	0	60	165	0	54	0	0
ENST00000341976.5	chr22	82	-1	6895	1308	475	5112	ZNF70	TAG	TAGA	5.82308	4.36731	1.34379	0.111982	52	39	12	1	0.844536	3.33892	2.82903	0.0219058	0.00656073	420	61	0	414	0	0
ENST00000279392.7	chr16	355	-1	3343	1638	825	880	HIRIP3	TGA	TGAG	57.1109	41.5454	15.3416	0.223964	510	371	137	2	17.0837	25.3635	18.5958	0.254505	0.0100343	51	15	0	45	0	0
ENST00000396668.8	chr7	73	1	12306	792	128	11386	TMEM106B	TAA	TAAA	49.0482	46.6966	1.9037	0.447929	438	417	17	4	3.98572	58.9604	14.8726	0.0393403	0.000667234	207	226	0.223964	201	1.11425	0.0188983
ENST00000229922.7	chr6	75	1	2880	1401	147	1332	CAP2	TAA	TAAC	18.925	18.2531	0.447929	0.223964	169	163	4	2	6.57118	13.0286	3.04714	0.168142	0.0129055	30	29	0	24	0	0
ENST00000306480.11	chr4	621	-1	9908	783	81	9044	TMEM192	TGA	TGAG	17.0213	15.5655	0.671893	0.783876	152	139	6	7	1.71794	19.8794	8.29498	0.0866736	0.00435998	48	138	0	42	0	0
ENST00000247207.6	chr14	286	1	2722	1887	376	459	HSPA2	TAA	TAAG	27.6596	27.2117	0.447929	0	247	243	4	0	10.1615	14.4206	1.1913	0	0	150	12	0	144	0	0
ENST00000438932.2	chr19	914	-1	3290	1104	144	2042	PNMA8A	TGA	TGAG	31.9149	29.4513	2.35163	0.111982	285	263	21	1	9.70059	26.6769	16.3307	0.0548395	0.00205569	57	34	0	51	0	0
ENST00000542638.5	chr6	507	-1	2830	756	365	1709	ELOVL5	TGA	TGAA	134.379	119.821	11.1982	3.35947	1200	1070	100	30	47.4836	158.493	30.6801	1.96575	0.0124027	24	40	0	18	0	0
ENST00000380701.8	chr9	51	1	6508	3948	365	2195	CCDC171	TGA	TGAC	6.27101	5.71109	0.559911	0	56	51	5	0	0.963584	1.44658	1.534	0	0	33	45	0	27	0	0
ENST00000542180.5	chr13	90	-1	2433	2178	150	105	SUPT20H	TGA	TGAG	47.4805	45.0169	2.46361	0	424	402	22	0	19.5152	20.6689	16.4241	0	0	24	3	0	18	0	0
ENST00000298351.5	chr14	388	1	5318	2388	167	2763	TMEM63C	TGA	TGAC	4.25533	4.14334	0	0.111982	38	37	0	1	0.800174	1.73507	0	0.0405292	0.0233589	165	24	0	159	0	0
ENST00000416007.9	chr14	158	-1	1558	1002	43	513	MBIP	TGA	TGAA	46.2487	46.2487	0	0	413	413	0	0	29.6846	46.1564	0	0	0	66	12	0	60	0	0
ENST00000245680.7	chr2	578	-1	10269	1539	227	8503	SLC35F5	TAG	TAGC	46.4726	40.8735	4.70325	0.895858	415	365	42	8	4.52553	26.5585	20.7192	0.105358	0.00396701	27	200	0.223964	21	10.665	0.401566
ENST00000264935.6	chr5	6	1	2321	1911	16	394	CEP72	TGA	TGAC	12.2061	12.2061	0	0	109	109	0	0	5.25897	6.38727	0	0	0	30	9	0	24	0	0
ENST00000265460.9	chr11	502	1	5700	3303	29	2368	MYRF	TGA	TGAG	4.03136	3.91938	0	0.111982	36	35	0	1	0.707256	1.18661	0	0.0472898	0.0398528	135	29	0	129	0	0
ENST00000353533.10	chr17	222	1	3733	1167	4	2562	MAP2K4	TGA	TGAT	25.084	24.8601	0	0.223964	224	222	0	2	6.71953	21.3025	0	0.0874178	0.00410364	24	45	0.111982	18	6.22124	0.292042
ENST00000391851.8	chr19	1020	1	1348	1029	123	196	PRMT1	TGA	TGAG	361.591	361.143	0.223964	0.223964	3229	3225	2	2	268.242	350.965	1.82085	1.14268	0.00325581	48	3	0.223964	42	5.33249	0.0151938
ENST00000355346.8	chr2	25	-1	1918	570	204	1144	ITGB1BP1	TGA	TGAA	18.1411	13.1019	4.25533	0.783876	162	117	38	7	9.45835	22.9858	20.8594	0.685206	0.0298099	81	24	0.111982	75	1.4931	0.0649573
ENST00000338965.8	chr11	219	1	6393	1332	238	4823	NCR3LG1	TAA	TAAA	23.4043	21.1646	1.11982	1.11982	209	189	10	10	3.66092	15.8894	4.70514	0.232184	0.0146125	111	97	0.447929	105	4.26599	0.268481
ENST00000641863.1	chr1	995	-1	2322	1347	842	133	SRGAP2B	TAA	TAAA	12.542	3.1355	9.40651	0	112	28	84	0	5.40138	2.32777	11.1716	0	0	81	2	0	75	0	0
ENST00000520701.5	chr5	596	1	1960	1398	132	430	SLC36A1	TAG	TAGG	5.71109	5.71109	0	0	51	51	0	0	2.91382	4.08519	0	0	0	351	3	0	345	0	0
ENST00000362057.4	chr9	430	-1	4025	2691	666	668	WHRN	TAG	TAGA	5.26317	4.14334	1.11982	0	47	37	10	0	1.30762	1.5397	1.68142	0	0	228	2	0	222	0	0
ENST00000308167.9	chrX	580	-1	4120	1959	374	1787	ELF4	TAA	TAAG	20.7167	19.2609	1.34379	0.111982	185	172	12	1	5.02833	9.83203	3.59301	0.0626649	0.00637355	24	24	0	18	0	0
ENST00000264183.9	chr1	1789	-1	5977	3906	454	1617	ARID4B	TGA	TGAC	62.0382	54.8713	6.9429	0.223964	554	490	62	2	10.3795	14.048	15.2927	0.138506	0.00985953	42	34	0.223964	36	6.22124	0.442857
ENST00000495461.6	chr3	376	-1	1452	252	65	1135	SELENOK	TAA	TAAA	42.5533	41.5454	0.223964	0.783876	380	371	2	7	29.3066	164.863	3.44561	0.690639	0.00418918	96	31	0.447929	90	4.97699	0.0301887
ENST00000253247.9	chr17	861	1	2799	2127	6	666	NOL11	TGA	TGAT	326.876	325.644	0	1.2318	2919	2908	0	11	116.783	153.1	0	1.84956	0.0120807	33	10	0.559911	27	20.7375	0.13545
ENST00000568584.5	chr10	0	-1	1745	1302	345	98	TUBB8	TAG	TAGA	9.18254	9.18254	0	0	82	82	0	0	5.2622	7.05265	0	0	0	57	1	0	51	0	0
ENST00000359655.9	chr10	259	1	2432	2328	52	52	SUPV3L1	TAG	TAGT	80.5152	79.9553	0.559911	0	719	714	5	0	33.1066	34.3451	10.7675	0	0	57	1	0	51	0	0
ENST00000589785.1	chr17	627	1	1873	873	158	842	TMUB2	TAA	TAAG	11.7581	9.29453	2.46361	0	105	83	22	0	6.2777	10.6467	15.5925	0	0	210	4	0	204	0	0
ENST00000361311.4	chr1	114	-1	4602	2883	245	1474	CLSTN1	TGA	TGAC	112.99	110.75	2.01568	0.223964	1009	989	18	2	24.5524	38.415	8.22727	0.151943	0.00395531	159	19	0.111982	153	0.73191	0.0190527
ENST00000527348.1	chr11	640	1	625	237	268	120	BANF1	TGA	TGAT	146.473	141.098	4.14334	1.2318	1308	1259	37	11	234.356	595.349	15.4602	10.265	0.0172421	120	0	1.00784	114	8.8407	0.0148496
ENST00000606498.5	chr1	690	-1	924	591	15	318	TM2D1	TAA	TAAA	24.4121	24.1882	0	0.223964	218	216	0	2	26.4201	40.9275	0	0.704291	0.0172082	36	9	0	30	0	0
ENST00000405914.1	chr2	93	-1	3135	2349	567	219	KIF3C	TGA	TGAC	6.04704	5.37515	0.559911	0.111982	54	48	5	1	1.92888	2.28827	0.987498	0.511334	0.223459	219	0	0.111982	213	0.525738	0.229754
ENST00000239165.8	chr17	696	-1	1326	621	96	609	HOXB7	TGA	TGAG	11.8701	11.5342	0.335947	0	106	103	3	0	8.95182	18.5735	3.49945	0	0	93	7	0	87	0	0
ENST00000396330.6	chr8	352	-1	3407	1002	501	1904	SNX16	TAA	TAAT	3.47145	2.68757	0.783876	0	31	24	7	0	1.01892	2.68221	1.56462	0	0	45	43	0	39	0	0
ENST00000638572.2	chr2	420	-1	4321	1224	79	3018	ST3GAL5	TGA	TGAA	1.45577	1.45577	0	0	13	13	0	0	0.336906	1.18935	0	0	0	114	46	0	108	0	0
ENST00000336596.7	chr3	449	1	5667	2919	122	2626	EPHA3	TAA	TAAA	28.4435	25.42	3.02352	0	254	227	27	0	5.01914	8.70845	24.783	0	0	153	67	0	147	0	0
ENST00000512701.6	chr9	48	-1	10438	2016	31	8391	TTC39B	TGA	TGAT	8.62263	8.62263	0	0	77	77	0	0	0.826081	4.2771	0	0	0	201	170	0	195	0	0
ENST00000358208.8	chr20	243	1	3806	1578	181	2047	SRC	TAG	TAGG	9.96642	9.40651	0.447929	0.111982	89	84	4	1	2.61861	5.96103	2.47475	0.0547055	0.00917719	180	19	0.111982	174	0.643576	0.107964
ENST00000216122.9	chr22	193	1	3413	2172	71	1170	MCM5	TGA	TGAG	318.478	311.535	6.9429	0	2844	2782	62	0	93.3131	143.432	97.7873	0	0	306	26	0	300	0	0
ENST00000623402.1	chr22	43	-1	3203	2583	66	554	SCARF2	TAG	TAGC	12.318	12.0941	0.223964	0	110	108	2	0	3.84578	4.68218	3.3934	0	0	117	5	0	111	0	0
ENST00000375650.5	chr6	248	1	2472	1893	207	372	HSPA1B	TAG	TAGG	2184.66	1913.33	268.197	3.1355	19509	17086	2394	28	883.763	1010.74	1295.64	8.42877	0.00833922	117	4	2.23964	111	20.177	0.0199626
ENST00000450879.2	chr14	52	-1	3133	2688	94	351	SALL2	TAG	TAGC	46.4726	46.1367	0.335947	0	415	412	3	0	14.8333	17.1639	3.5739	0	0	66	7	0	60	0	0
ENST00000456397.7	chr8	205	-1	3194	612	64	2518	TM2D2	TAA	TAAG	51.1759	49.1602	1.2318	0.783876	457	439	11	7	16.0225	80.3271	19.2469	0.311309	0.00387551	51	51	0.111982	45	2.48849	0.0309795
ENST00000260956.9	chr2	747	1	1605	1194	109	302	SSB	TAG	TAGT	586.675	573.685	11.8701	1.11982	5239	5123	106	10	365.53	480.473	108.9	3.70802	0.00771744	30	8	0.223964	24	9.33185	0.0194222
ENST00000335327.5	chr13	40	1	4745	1476	172	3097	WASF3	TGA	TGAG	4.03136	3.47145	0.335947	0.223964	36	31	3	2	0.849602	2.35193	1.95318	0.0723166	0.0307478	81	49	0	75	0	0
ENST00000431456.5	chr11	939	-1	1200	834	217	149	PIH1D2	TGA	TGAA	2.23964	2.01568	0.223964	0	20	18	2	0	1.86637	2.41688	1.03209	0	0	45	3	0	39	0	0
ENST00000300291.10	chr16	473	-1	4348	651	124	3573	NUDT21	TGA	TGAA	147.369	130.123	15.0056	2.23964	1316	1162	134	20	33.8934	199.882	121.013	0.626825	0.00313597	45	86	0.671893	39	17.228	0.0861909
ENST00000402655.6	chr16	673	1	1549	903	119	527	WWOX	TGA	TGAG	9.51849	8.51065	1.00784	0	85	76	9	0	6.14493	9.42486	8.46925	0	0	150	6	0	144	0	0
ENST00000322522.8	chr2	839	1	1874	1167	450	257	INPP1	TAG	TAGA	5.82308	5.15118	0.671893	0	52	46	6	0	3.1073	4.41404	1.4931	0	0	30	4	0	24	0	0
ENST00000264668.6	chr5	34	1	3229	2145	24	1060	MTRR	TAA	TAAA	35.3864	35.3864	0	0	316	316	0	0	10.9589	16.4972	0	0	0	27	22	0	21	0	0
ENST00000534025.6	chr11	177	-1	1799	564	123	1112	TMEM9B	TAA	TAAT	9.40651	6.9429	2.23964	0.223964	84	62	20	2	5.22874	12.3101	18.2085	0.201407	0.0163611	84	19	0.111982	78	1.43567	0.116625
ENST00000222800.7	chr7	301	-1	1438	915	64	459	ABHD11	TAA	TAAG	19.149	19.037	0.111982	0	171	170	1	0	13.3164	20.8054	1.74972	0	0	69	6	0	63	0	0
ENST00000398822.7	chr22	66	-1	1442	1050	234	158	MAPK1	TAA	TAAA	131.243	125.644	5.48713	0.111982	1172	1122	49	1	91.0147	119.661	23.4493	0.708748	0.00592297	24	5	0.111982	18	6.22124	0.0519905
ENST00000307741.11	chr19	87	1	4716	2037	154	2525	THOP1	TGA	TGAG	71.7806	69.9889	1.67973	0.111982	641	625	15	1	15.2207	34.3588	10.9074	0.0443494	0.00129077	57	16	0.111982	51	2.19573	0.0639059
ENST00000582401.5	chr1	1012	-1	2881	1143	328	1410	TXNIP	TGA	TGAG	38.7459	32.3629	6.04704	0.335947	346	289	54	3	13.4488	28.314	18.4361	0.23826	0.00841493	135	24	0.111982	129	0.868079	0.030659
ENST00000369534.8	chrX	761	-1	1961	1368	106	487	MPP1	TAA	TAAG	61.5902	59.7985	1.79172	0	550	534	16	0	31.4076	43.7124	16.903	0	0	69	9	0	63	0	0
ENST00000373709.8	chr1	394	1	1855	1335	47	473	SERINC2	TGA	TGAG	2.57559	2.46361	0	0.111982	23	22	0	1	1.38846	1.8454	0	0.236749	0.128291	60	6	0.111982	54	2.07375	1.12374
ENST00000258829.5	chr14	161	-1	1216	687	212	317	NKX2-8	TGA	TGAG	2.01568	1.2318	0.783876	0	18	11	7	0	1.65763	1.79302	3.69753	0	0	264	2	0	258	0	0
ENST00000344537.9	chr6	70	-1	1358	1023	167	168	DTNBP1	TAA	TAAA	23.1803	22.2845	0.783876	0.111982	207	199	7	1	17.0695	21.7834	4.69387	0.666561	0.0305994	87	2	0	81	0	0
ENST00000261520.9	chr15	241	-1	7161	2916	226	4019	ICE2	TGA	TGAG	46.3607	42.3293	3.58343	0.447929	414	378	32	4	6.47405	14.5162	15.8559	0.111453	0.00767782	42	93	0.223964	36	6.22124	0.428571
ENST00000569466.1	chr16	370	-1	1372	993	247	132	CD2BP2	TGA	TGAG	77.9396	75.812	2.01568	0.111982	696	677	18	1	56.8073	76.3464	8.16065	0.84835	0.0111119	132	0	0.111982	126	0.888748	0.011641
ENST00000367833.7	chr1	1386	1	2953	786	110	2057	TIPRL	TAA	TAAA	98.2084	94.849	2.91154	0.447929	877	847	26	4	33.2572	120.673	26.4685	0.217758	0.00180453	84	40	0.335947	78	4.30701	0.0356916
ENST00000374169.7	chr9	420	-1	2064	411	83	1570	POLE3	TGA	TGAA	69.317	61.3663	7.39083	0.559911	619	548	66	5	33.5838	149.31	89.0461	0.356631	0.00238854	93	29	0.223964	87	2.5743	0.0172414
ENST00000587424.2	chr11	864	1	3983	816	24	3143	SRSF8	TAA	TAAG	39.5297	37.85	0.559911	1.11982	353	338	5	10	9.92461	46.3848	23.3296	0.356291	0.0076812	144	74	0.335947	138	2.4344	0.0524826
ENST00000222256.8	chr19	479	-1	1483	630	173	680	RAB3A	TGA	TGAG	10.4143	10.3024	0.111982	0	93	92	1	0	7.02249	16.353	0.647296	0	0	66	5	0	60	0	0
ENST00000356079.8	chr2	901	1	1904	1356	117	431	CYP20A1	TAA	TAAA	24.5241	23.6283	0.895858	0	219	211	8	0	12.8803	17.425	7.65691	0	0	33	9	0	27	0	0
ENST00000329101.8	chr18	237	1	4550	2760	50	1740	NFATC1	TAG	TAGT	9.40651	9.40651	0	0	84	84	0	0	2.06736	3.40816	0	0	0	63	20	0	57	0	0
ENST00000373886.7	chr10	220	1	5430	2892	-2	2540	BICC1	TAG	TAGC	16.4614	8.1747	8.28669	0	147	73	74	0	3.03156	2.82666	-4143.34	0	0	60	53	0	54	0	0
ENST00000259239.7	chr2	629	1	1695	843	702	150	IMP4	TGA	TGAG	53.0796	51.8478	1.2318	0	474	463	11	0	31.3154	61.5039	1.75471	0	0	57	2	0	51	0	0
ENST00000356994.7	chr8	569	-1	5562	4935	395	232	SCRIB	TAG	TAGA	96.1928	94.0651	2.12766	0	859	840	19	0	17.2946	19.0608	5.38649	0	0	96	7	0	90	0	0
ENST00000407418.7	chr22	255	-1	6077	1206	118	4753	CBX6	TGA	TGAG	124.412	119.037	1.56775	3.8074	1111	1063	14	34	20.4726	98.7041	13.286	0.801051	0.00811568	336	39	0.223964	330	0.67868	0.00687591
ENST00000403298.8	chr6	394	-1	2117	1398	105	614	TFEB	TGA	TGAC	2.35163	2.35163	0	0	21	21	0	0	1.11083	1.68214	0	0	0	96	7	0	90	0	0
ENST00000636863.1	chr5	107	-1	1104	303	80	721	TTC33	TAA	TAAG	5.0392	4.47929	0.559911	0	45	40	5	0	4.56449	14.7831	6.99889	0	0	30	15	0	24	0	0
ENST00000558653.5	chr15	181	1	1086	882	178	26	DTWD1	TAG	TAGT	13.3259	11.0862	2.23964	0	119	99	20	0	12.2706	12.5694	12.5823	0	0	26	0	0	20	0	0
ENST00000380518.8	chr12	294	-1	5014	4431	149	434	COL2A1	TAA	TAAA	34.0426	33.3707	0.671893	0	304	298	6	0	6.78951	7.53119	4.50935	0	0	102	4	0	96	0	0
ENST00000367288.5	chr1	1552	-1	3882	1770	202	1910	LMOD1	TAG	TAGG	4.14334	3.91938	0.223964	0	37	35	2	0	1.06732	2.21434	1.10874	0	0	36	24	0	30	0	0
ENST00000330181.9	chr16	339	1	1120	795	236	89	SLX1B	TGA	TGAT	23.5163	17.4692	6.04704	0	210	156	54	0	20.9967	21.9739	25.6231	0	0	72	3	0	66	0	0
ENST00000295797.5	chr3	821	1	4842	1758	240	2844	PRKCI	TGA	TGAT	60.3584	59.3506	0.783876	0.223964	539	530	7	2	12.4656	33.7603	3.26615	0.0787498	0.00233262	54	54	0.111982	48	2.33296	0.0691038
ENST00000258796.12	chr7	29	1	4760	1539	164	3057	TTYH3	TAG	TAGA	20.3808	19.4849	0.559911	0.335947	182	174	5	3	4.28167	12.6608	3.41409	0.109894	0.00867991	951	17	0.111982	945	0.1185	0.00935961
ENST00000619168.4	chr10	49	1	8108	1125	331	6652	CAMK1D	TGA	TGAC	4.59127	3.91938	0.559911	0.111982	41	35	5	1	0.566264	3.48389	1.69157	0.0168344	0.00483206	255	89	0.111982	249	0.449728	0.129088
ENST00000379084.5	chr9	129	-1	848	462	286	100	FAM219A	TGA	TGAG	8.73462	5.26317	3.47145	0	78	47	31	0	10.3003	11.3921	12.1379	0	0	100	0	0	94	0	0
ENST00000373365.5	chr6	370	-1	1971	522	85	1364	GLO1	TAG	TAGT	578.836	551.737	24.6361	2.46361	5169	4927	220	22	293.676	1056.97	289.836	1.80617	0.00170882	240	26	1.2318	234	5.26412	0.00498041
ENST00000360359.5	chr6	326	1	6305	3372	142	2791	ANKS1A	TGA	TGAG	49.3842	48.8243	0.335947	0.223964	441	436	3	2	7.83254	14.4793	2.36582	0.0802453	0.00554206	36	35	0	30	0	0
ENST00000521059.5	chr8	529	-1	4360	3126	176	1058	PTK2	TGA	TGAG	55.4312	52.2957	3.02352	0.111982	495	467	27	1	12.7136	16.7293	17.1791	0.105843	0.00632683	75	21	0	69	0	0
ENST00000373150.8	chr1	460	1	3193	2394	214	585	MAP7D1	TAA	TAAG	44.6809	39.4178	5.26317	0	399	352	47	0	13.9934	16.4652	24.5942	0	0	33	6	0	27	0	0
ENST00000426086.2	chr11	569	1	934	534	8	392	VEGFB	TGA	TGAC	3.47145	3.24749	0.111982	0.111982	31	29	1	1	3.71676	6.08143	13.9978	0.285669	0.046974	174	5	0	168	0	0
ENST00000645858.1	chr9	118	-1	874	681	17	176	AQP3	TGA	TGAC	1.2318	1.2318	0	0	11	11	0	0	1.40939	1.80882	0	0	0	147	1	0	141	0	0
ENST00000268459.6	chr16	452	1	16994	1380	152	15462	NKD1	TAG	TAGA	1.56775	1.56775	0	0	14	14	0	0	0.0922532	1.13605	0	0	0	33	204	0	27	0	0
ENST00000224807.9	chr10	491	1	3044	945	450	1649	SFXN3	TGA	TGAG	4.47929	2.01568	2.46361	0	40	18	22	0	1.47151	2.133	5.47469	0	0	126	25	0	120	0	0
ENST00000157600.8	chr3	14	1	8239	1065	110	7064	LMCD1	TGA	TGAA	4.59127	4.59127	0	0	41	41	0	0	0.557261	4.31105	0	0	0	75	107	0	69	0	0
ENST00000219409.8	chr16	11	1	919	645	84	190	ARHGDIG	TGA	TGAA	2.57559	2.46361	0.111982	0	23	22	1	0	2.8026	3.81955	1.33312	0	0	174	1	0	168	0	0
ENST00000361923.2	chr1	98	1	6158	3573	169	2416	PER3	TGA	TGAG	4.25533	3.91938	0.335947	0	38	35	3	0	0.691024	1.09694	1.98785	0	0	63	56	0	57	0	0
ENST00000510370.5	chr4	659	-1	749	504	224	21	DCTD	TGA	TGAG	17.6932	16.7973	0.895858	0	158	150	8	0	23.6224	33.3281	3.99937	0	0	21	0	0	15	0	0
ENST00000407501.6	chr18	17	1	1540	786	351	403	TGIF1	TAA	TAAC	9.29453	8.06272	1.00784	0.223964	83	72	9	2	6.03541	10.2579	2.87134	0.555743	0.054177	63	6	0.223964	57	3.9292	0.383041
ENST00000417647.7	chr5	491	1	1860	1641	74	145	IK	TAA	TAAT	129.451	128.556	0.447929	0.447929	1156	1148	4	4	69.5976	78.3398	6.05309	3.08917	0.0394329	96	4	0.447929	90	4.97699	0.0635308
ENST00000333643.4	chrX	435	-1	732	303	217	212	BEX5	TGA	TGAA	3.91938	3.02352	0.895858	0	35	27	8	0	5.35434	9.97862	4.12838	0	0	66	2	0	60	0	0
ENST00000457749.7	chr19	1109	-1	4513	2124	115	2274	ZNF28	TGA	TGAA	7.72678	6.38299	0.783876	0.559911	69	57	7	5	1.71212	3.00517	6.81631	0.246223	0.0819331	84	43	0.559911	78	7.17835	2.38866
ENST00000254488.7	chr3	46	1	4204	1866	32	2306	SLC6A11	TGA	TGAG	10.3024	10.3024	0	0	92	92	0	0	2.45061	5.5211	0	0	0	57	20	0	51	0	0
ENST00000608933.6	chr4	378	-1	6264	1086	209	4969	PPM1K	TGA	TGAT	35.7223	30.7951	4.25533	0.671893	319	275	38	6	5.7028	28.3565	20.3604	0.135217	0.00476847	18	96	0	12	0	0
ENST00000614711.4	chr11	1009	-1	3012	2001	94	917	HYOU1	TGA	TGAG	168.533	166.854	1.56775	0.111982	1505	1490	14	1	55.9539	83.3851	16.6782	0.122118	0.00146451	48	7	0	42	0	0
ENST00000339364.10	chr10	438	-1	4755	2385	114	2256	PIK3AP1	TGA	TGAT	3.47145	3.24749	0.223964	0	31	29	2	0	0.730063	1.36163	1.9646	0	0	78	47	0	72	0	0
ENST00000270645.8	chr19	1012	1	1424	954	56	414	RCN3	TGA	TGAG	2.01568	2.01568	0	0	18	18	0	0	1.41551	2.11287	0	0	0	405	1	0	399	0	0
ENST00000304546.6	chr2	1074	-1	2826	2295	211	320	ECEL1	TGA	TGAG	2.68757	2.35163	0.335947	0	24	21	3	0	0.951017	1.02467	1.59216	0	0	234	2	0	228	0	0
ENST00000299641.8	chr10	313	-1	3490	2619	337	534	NDST2	TGA	TGAT	6.49497	6.15902	0.335947	0	58	55	3	0	1.86102	2.35167	0.996875	0	0	81	3	0	75	0	0
ENST00000411527.5	chr6	280	-1	1014	651	14	349	HLA-DQB2	TGA	TGAC	0.783876	0.783876	0	0	7	7	0	0	0.773053	1.20411	0	0	0	174	5	0	168	0	0
ENST00000367034.5	chr6	879	1	925	510	115	300	MRPL18	TAA	TAAA	115.342	86.8982	27.5476	0.895858	1030	776	246	8	124.694	170.389	239.545	2.98619	0.0175258	30	4	0.335947	24	13.9978	0.0821521
ENST00000292330.3	chr7	467	-1	918	729	117	72	PPP1R35	TAG	TAGA	18.1411	16.6854	1.45577	0	162	149	13	0	19.7616	22.888	12.4425	0	0	60	1	0	54	0	0
ENST00000394231.8	chr17	470	-1	1352	315	31	1006	MIEN1	TGA	TGAC	29.2274	26.3158	0	2.91154	261	235	0	26	21.6179	83.5423	0	2.89417	0.0346432	156	7	1.56775	150	10.4517	0.125106
ENST00000372452.5	chr6	435	1	2620	1611	317	692	TJAP1	TAG	TAGG	20.2688	16.6854	3.58343	0	181	149	32	0	7.73618	10.3571	11.3042	0	0	177	7	0	171	0	0
ENST00000471675.1	chr3	549	-1	667	156	89	422	B4GALT4	TGA	TGAG	2.68757	1.34379	1.34379	0	24	12	12	0	4.02935	8.61402	15.0987	0	0	30	12	0	24	0	0
ENST00000344275.11	chr12	883	-1	2349	2013	255	81	ABCB9	TGA	TGAA	10.5263	6.49497	4.03136	0	94	58	36	0	4.4812	3.22651	15.8093	0	0	81	0	0	75	0	0
ENST00000310776.8	chr3	698	1	1075	1050	2	23	MRPS22	TAA	TAAA	122.173	122.173	0	0	1091	1091	0	0	113.649	116.355	0	0	0	23	0	0	17	0	0
ENST00000501704.3	chr13	123	-1	3981	1680	485	1816	TSC22D1	TAG	TAGT	7.50281	7.05488	0.223964	0.223964	67	63	2	2	1.88465	4.19933	0.461782	0.123328	0.0293686	21	52	0	15	0	0
ENST00000252542.9	chr19	155	-1	3122	2829	55	238	SAFB2	TAA	TAAG	103.472	100.672	2.57559	0.223964	924	899	23	2	33.1427	35.5857	46.8289	0.941027	0.0264439	87	3	0.223964	81	2.76499	0.0776995
ENST00000263256.7	chr22	292	-1	3735	474	198	3063	DESI1	TAA	TAAC	41.2095	34.0426	5.37515	1.79172	368	304	48	16	11.0333	71.8198	27.1472	0.584955	0.00814475	48	43	0	42	0	0
ENST00000571750.5	chr16	647	-1	2988	2292	203	493	RFWD3	TGA	TGAC	124.748	120.045	4.70325	0	1114	1072	42	0	41.7497	52.3756	23.1687	0	0	99	8	0	93	0	0
ENST00000621161.5	chr17	361	1	8526	1881	172	6473	RAB11FIP4	TAA	TAAG	15.0056	14.5577	0.335947	0.111982	134	130	3	1	1.75998	7.73934	1.95318	0.0172999	0.00223532	30	92	0	24	0	0
ENST00000347901.8	chr17	551	-1	3886	1827	4	2055	HAP1	TGA	TGAA	3.02352	3.02352	0	0	27	27	0	0	0.778055	1.65491	0	0	0	129	17	0	123	0	0
ENST00000265529.7	chr3	244	-1	3266	2340	675	251	KIF9	TAG	TAGA	8.51065	5.0392	3.47145	0	76	45	31	0	2.60583	2.1535	5.14289	0	0	54	2	0	48	0	0
ENST00000262209.5	chr8	316	-1	5146	3327	169	1650	TRPA1	TAG	TAGC	3.91938	3.69541	0.223964	0	35	33	2	0	0.761636	1.11073	1.32523	0	0	42	33	0	36	0	0
ENST00000435224.3	chr11	295	-1	4860	3045	421	1394	ABTB2	TGA	TGAG	10.9743	9.29453	1.67973	0	98	83	15	0	2.25808	3.05239	3.98987	0	0	309	13	0	303	0	0
ENST00000256969.7	chr12	205	1	2235	318	171	1746	SPX	TGA	TGAA	0.783876	0.335947	0	0.447929	7	3	0	4	0.350727	1.05644	0	0.256546	0.242841	51	39	0.223964	45	4.97699	4.71111
ENST00000375630.6	chr13	276	1	8723	3543	82	5098	ATP11A	TGA	TGAT	9.51849	9.40651	0	0.111982	85	84	0	1	1.09119	2.65496	0	0.0219659	0.00827355	717	62	0	711	0	0
ENST00000393611.6	chr5	716	-1	1191	579	326	286	RAB24	TGA	TGAG	14.2217	8.8466	5.26317	0.111982	127	79	47	1	11.941	15.2791	16.1447	0.391546	0.0256263	30	5	0	24	0	0
ENST00000229633.7	chr6	733	1	3280	516	202	2562	HINT3	TGA	TGAA	18.4771	14.5577	3.69541	0.223964	165	130	33	2	5.63325	28.2126	18.2941	0.0874178	0.00309854	216	55	0	210	0	0
ENST00000542120.5	chr12	557	1	7388	1911	239	5238	TBC1D30	TGA	TGAT	6.83092	6.15902	0.671893	0	61	55	6	0	0.924596	3.22293	2.81127	0	0	72	92	0	66	0	0
ENST00000304177.10	chr15	434	-1	11229	429	26	10774	C15orf40	TAA	TAAA	15.5655	15.1176	0	0.447929	139	135	0	4	1.38619	35.2392	0	0.041575	0.00117979	81	154	0	75	0	0
ENST00000368216.9	chr1	1246	1	2226	1395	630	201	RRNAD1	TGA	TGAT	9.96642	6.71893	3.1355	0.111982	89	60	28	1	4.47728	4.81644	4.97699	0.557126	0.115672	156	2	0.111982	150	0.746548	0.155
ENST00000299045.8	chr12	721	1	2232	1527	238	467	TCP11L2	TAA	TAAA	17.9172	17.0213	0.783876	0.111982	160	152	7	1	8.0274	11.1469	3.2936	0.239791	0.0215119	66	12	0	60	0	0
ENST00000245564.6	chr1	1210	1	2386	1680	18	688	MSTO1	TAA	TAAA	27.4357	27.4357	0	0	245	245	0	0	11.4986	16.3307	0	0	0	99	10	0	93	0	0
ENST00000330029.6	chr22	143	1	871	159	24	688	UQCR10	TAG	TAGT	227.548	223.741	1.9037	1.9037	2031	1997	17	17	261.249	1407.17	79.3208	2.767	0.00196636	177	8	1.45577	171	8.51327	0.00604991
ENST00000409116.5	chr2	318	1	1294	444	20	830	SNRNP27	TAA	TAAC	35.8343	35.6104	0	0.223964	320	318	0	2	27.6927	80.2035	0	0.269837	0.0033644	42	14	0	36	0	0
ENST00000358389.7	chr19	1137	1	4073	2229	1577	267	CNOT3	TGA	TGAC	75.3641	72.9004	2.46361	0	673	651	22	0	18.5033	32.7054	1.56221	0	0	60	2	0	54	0	0
ENST00000399300.6	chr8	384	-1	7224	2973	208	4043	RBM12B	TAG	TAGA	46.6966	44.6809	1.56775	0.447929	417	399	14	4	6.46409	15.0289	7.53727	0.110791	0.00737188	87	91	0.223964	81	2.76499	0.183978
ENST00000228799.7	chr12	18	1	2275	1311	87	877	ITFG2	TAG	TAGC	10.6383	10.0784	0.111982	0.447929	95	90	1	4	4.67618	7.68757	1.28715	0.510751	0.0664386	24	18	0.111982	18	6.22124	0.809259
ENST00000502486.6	chr4	171	-1	8582	1572	351	6659	BEND4	TAG	TAGT	12.318	10.8623	1.2318	0.223964	110	97	11	2	1.43534	6.90985	3.50942	0.0336334	0.00486745	54	132	0	48	0	0
ENST00000476627.5	chr7	790	-1	837	708	82	47	TMUB1	TAG	TAGT	18.1411	17.2453	0.783876	0.111982	162	154	7	1	21.674	24.3577	9.55946	2.3826	0.0978171	47	0	0	41	0	0
ENST00000264020.6	chr11	996	-1	1774	1035	372	367	IFT46	TGA	TGAG	37.5141	25.9799	11.3102	0.223964	335	232	101	2	21.1466	25.1013	30.4038	0.610257	0.0243118	54	5	0.111982	48	2.33296	0.0929418
ENST00000325599.13	chr3	432	-1	2801	1701	99	1001	SHQ1	TGA	TGAC	69.653	68.0852	0.671893	0.895858	622	608	6	8	24.8672	40.0266	6.7868	0.894963	0.0223592	27	20	0.559911	21	26.6624	0.666118
ENST00000370321.8	chr1	815	1	983	861	69	53	RPL5	TAA	TAAA	1229.23	1206.94	20.4928	1.79172	10976	10777	182	16	1250.49	1401.79	296.996	33.806	0.0241162	53	0	1.79172	47	38.1216	0.0271949
ENST00000328827.9	chr12	615	-1	8946	990	234	7722	PAWR	TAG	TAGA	62.934	56.999	5.0392	0.895858	562	509	45	8	7.03488	57.5747	21.535	0.116014	0.00201501	54	166	0.671893	48	13.9978	0.243124
ENST00000650790.1	chr12	554	1	2961	2157	136	668	TBK1	TAG	TAGC	49.2722	48.4883	0.671893	0.111982	440	433	6	1	16.6404	22.4795	4.94039	0.167638	0.00745737	48	18	0.111982	42	2.66624	0.118608
ENST00000336032.3	chr6	602	1	2020	951	111	958	PNRC1	TAG	TAGA	33.4827	27.0997	6.38299	0	299	242	56	0	16.5756	28.496	57.5044	0	0	222	22	0	216	0	0
ENST00000445930.7	chr14	217	1	2118	1137	14	967	PSMC6	TAA	TAAT	174.468	173.349	0.223964	0.895858	1558	1548	2	8	82.3741	152.461	15.9975	0.92643	0.00607649	30	25	0	24	0	0
ENST00000540689.6	chr19	395	1	3550	879	117	2554	ZNF333	TAA	TAAT	1.34379	1.34379	0	0	12	12	0	0	0.378532	1.52877	0	0	0	201	38	0	195	0	0
ENST00000314103.6	chr21	115	1	4421	1647	131	2643	CHAF1B	TGA	TGAT	87.0102	84.4346	2.57559	0	777	754	23	0	19.6811	51.2657	19.661	0	0	60	35	0	54	0	0
ENST00000394593.7	chr1	800	1	3300	2544	406	350	LRRC8D	TAA	TAAA	10.5263	9.51849	0.895858	0.111982	94	85	8	1	3.1898	3.74155	2.20655	0.319949	0.0855126	24	11	0	18	0	0
ENST00000258398.8	chr2	980	1	4685	3567	97	1021	TTLL4	TAA	TAAC	68.3092	62.934	5.26317	0.111982	610	562	47	1	14.5804	17.6434	54.2594	0.109679	0.00621643	84	15	0.111982	78	1.43567	0.0813715
ENST00000232744.13	chr3	624	1	1917	1404	68	445	ABTB1	TGA	TGAG	2.57559	2.57559	0	0	23	23	0	0	1.34355	1.83447	0	0	0	150	4	0	144	0	0
ENST00000311181.5	chr11	654	-1	1962	1215	78	669	B4GAT1	TGA	TGAG	146.137	141.322	1.45577	3.35947	1305	1262	13	30	74.4836	116.314	18.6637	5.02163	0.043173	228	9	3.24749	222	14.6283	0.125766
ENST00000316218.12	chr3	591	1	1799	1527	134	138	PDIA5	TAA	TAAT	17.9172	17.3572	0.559911	0	160	155	5	0	9.95951	11.3669	4.17844	0	0	96	1	0	90	0	0
ENST00000241463.4	chr13	44	1	1498	696	612	190	RASL11A	TGA	TGAA	9.85444	9.18254	0.671893	0	88	82	6	0	6.5784	13.1933	1.09787	0	0	135	2	0	129	0	0
ENST00000377967.8	chrX	163	1	5393	4173	35	1185	KDM6A	TGA	TGAT	41.7694	41.2095	0.223964	0.335947	373	368	2	3	7.74511	9.87526	6.39899	0.283499	0.028708	24	29	0.111982	18	6.22124	0.629982
ENST00000538954.5	chr9	453	-1	1212	474	111	627	STOM	TGA	TGAG	22.5084	22.3964	0.111982	0	201	200	1	0	18.5713	47.2499	1.00885	0	0	57	10	0	51	0	0
ENST00000321030.9	chr19	1136	1	1788	1467	46	275	PRPF31	TGA	TGAA	108.063	106.607	1.2318	0.223964	965	952	11	2	60.4378	72.6701	26.7784	0.814416	0.011207	69	1	0.223964	63	3.55499	0.0489196
ENST00000321545.5	chr19	1231	1	3645	1770	376	1499	ZNF543	TGA	TGAA	17.9172	15.7895	2.12766	0	160	141	19	0	4.91554	8.92062	5.65868	0	0	84	30	0	78	0	0
ENST00000409502.7	chr3	348	1	1745	711	257	777	PPM1M	TGA	TGAG	1.45577	1.2318	0.223964	0	13	11	2	0	0.834252	1.7325	0.871457	0	0	33	9	0	27	0	0
ENST00000356713.5	chr10	464	1	5657	2823	26	2808	CNNM1	TGA	TGAC	5.37515	5.37515	0	0	48	48	0	0	0.950176	1.90406	0	0	0	204	38	0	198	0	0
ENST00000377615.7	chr13	196	-1	1748	225	159	1364	COMMD6	TGA	TGAA	46.9206	45.8007	0	1.11982	419	409	0	10	26.8424	203.559	0	0.820984	0.00403315	75	24	0.223964	69	3.24586	0.0159456
ENST00000216468.8	chr14	393	-1	7716	945	35	6736	TMED8	TGA	TGAA	24.8601	24.5241	0.223964	0.111982	222	219	2	1	3.22188	25.9514	6.39899	0.0166244	0.000640598	108	122	0	102	0	0
ENST00000217381.2	chr20	188	-1	2297	1485	266	546	SNTA1	TAG	TAGA	5.37515	5.26317	0.111982	0	48	47	1	0	2.34007	3.54422	0.420986	0	0	51	4	0	45	0	0
ENST00000374867.7	chr10	135	-1	5595	2739	279	2577	NRP1	TGA	TGAA	33.2587	31.9149	1.34379	0	297	285	12	0	5.94437	11.652	4.81644	0	0	141	50	0	135	0	0
ENST00000354340.8	chr19	852	-1	3609	2691	46	872	ZNF112	TGA	TGAA	5.82308	5.71109	0.111982	0	52	51	1	0	1.61349	2.12229	2.4344	0	0	51	21	0	45	0	0
ENST00000379019.5	chr20	69	-1	5444	1986	207	3251	GPCPD1	TAG	TAGT	15.7895	15.3416	0.447929	0	141	137	4	0	2.90035	7.72486	2.16391	0	0	78	64	0	72	0	0
ENST00000394485.5	chr16	486	1	359	153	65	141	MT1X	TGA	TGAT	24.972	20.0448	4.36731	0.559911	223	179	39	5	69.56	131.012	67.1893	3.971	0.0303102	33	3	0.335947	27	12.4425	0.0949721
ENST00000260102.8	chr8	257	1	1102	858	68	176	MRPL15	TGA	TGAA	186.674	185.107	1.00784	0.559911	1667	1653	9	5	169.396	215.742	14.8212	3.18131	0.0147459	51	4	0.223964	45	4.97699	0.0230692
ENST00000394725.3	chr16	442	-1	2065	816	206	1043	SIAH1	TGA	TGAA	12.9899	11.7581	0.895858	0.335947	116	105	8	3	6.29053	14.4095	4.34883	0.322097	0.0223531	57	25	0	51	0	0
ENST00000257857.8	chr12	461	-1	1025	684	273	68	CD63	TAG	TAGG	154.088	151.4	2.68757	0	1376	1352	24	0	150.329	221.345	9.84459	0	0	66	1	0	60	0	0
ENST00000283875.6	chr3	566	1	2955	1287	75	1593	GTF2E1	TGA	TGAG	28.3315	27.3237	0.895858	0.111982	253	244	8	1	9.58765	21.2305	11.9448	0.0702965	0.0033111	30	28	0	24	0	0
ENST00000254528.4	chr18	12	1	5899	3129	177	2593	EMILIN2	TAA	TAAG	25.532	25.084	0.447929	0	228	224	4	0	4.32818	8.01663	2.53067	0	0	78	27	0	72	0	0
ENST00000328654.10	chr12	939	1	17652	1569	468	15615	ZNF26	TGA	TGAG	6.04704	3.8074	2.23964	0	54	34	20	0	0.34257	2.42664	4.78557	0	0	57	329	0	51	0	0
ENST00000229266.8	chr12	692	1	1527	1188	216	123	CHPT1	TGA	TGAA	37.4021	36.1703	1.00784	0.223964	334	323	9	2	24.4938	30.4464	4.66593	1.82085	0.0598052	129	1	0.223964	123	1.82085	0.0598052
ENST00000497164.5	chrX	246	-1	2437	2193	48	196	MAGED4B	TGA	TGAC	29.2274	29.0034	0.111982	0.111982	261	259	1	1	11.9932	13.2254	2.33296	0.571338	0.0431999	111	1	0.111982	105	1.0665	0.0806398
ENST00000374176.8	chr10	191	1	5583	1251	7	4325	MAPK8	TGA	TGAC	12.654	12.43	0.111982	0.111982	113	111	1	1	2.26652	9.93607	15.9975	0.0258918	0.00260584	51	94	0	45	0	0
ENST00000341162.8	chr14	364	1	4296	564	48	3684	FCF1	TAA	TAAT	52.6317	51.2879	1.11982	0.223964	470	458	10	2	12.2513	90.9359	23.3296	0.0607938	0.000668535	75	51	0	69	0	0
ENST00000376829.6	chr13	222	-1	3693	2571	846	276	DZIP1	TAA	TAAT	16.3494	8.8466	7.39083	0.111982	146	79	66	1	4.42713	3.44092	8.7362	0.405733	0.117914	63	3	0	57	0	0
ENST00000262493.12	chr16	471	1	3137	1032	741	1364	GNAO1	TGA	TGAC	1.67973	1.2318	0.447929	0	15	11	4	0	0.535459	1.19361	0.604493	0	0	72	15	0	66	0	0
ENST00000373610.8	chr1	405	1	4820	1608	128	3084	TXLNA	TAG	TAGA	111.198	109.743	1.11982	0.335947	993	980	10	3	23.0702	68.2479	8.74861	0.108932	0.00159612	108	39	0.111982	102	1.09787	0.0160864
ENST00000356362.6	chr7	535	-1	3435	1953	209	1273	PUS7	TGA	TGAG	72.5645	68.3092	4.03136	0.223964	648	610	36	2	21.125	34.9765	19.2888	0.175934	0.00503007	108	26	0.111982	102	1.09787	0.0313886
ENST00000597864.1	chr19	1243	1	589	54	347	188	ZNF530	TGA	TGAA	2.91154	0.559911	2.35163	0	26	5	21	0	4.94319	10.3687	6.77702	0	0	33	5	0	27	0	0
ENST00000230461.11	chr6	555	-1	4373	1053	148	3172	TMEM30A	TAA	TAAT	68.9811	66.8534	1.2318	0.895858	616	597	11	8	15.7743	63.4885	8.323	0.282427	0.00444847	60	66	0.447929	54	8.29498	0.130653
ENST00000216281.12	chr14	502	-1	3334	2166	200	968	HSP90AA1	TAA	TAAT	3364.39	3315.23	29.3393	19.8209	30043	29604	261	177	1009.12	1530.58	146.697	20.4761	0.013378	18	16	2.57559	12	214.633	0.14023
ENST00000221665.5	chr19	1197	-1	2600	1458	74	1068	FIZ1	TGA	TGAC	7.72678	6.15902	1.56775	0	69	55	14	0	2.97184	4.2243	21.1858	0	0	126	14	0	120	0	0
ENST00000294304.12	chr11	703	1	5132	4815	118	199	LRP5	TGA	TGAC	23.9642	23.6283	0.335947	0	214	211	3	0	4.66956	4.90722	2.84701	0	0	39	2	0	33	0	0
ENST00000409674.5	chr2	693	1	2352	2151	67	134	GPD2	TGA	TGAG	41.6574	41.6574	0	0	372	372	0	0	17.7115	19.3665	0	0	0	72	3	0	66	0	0
ENST00000265245.10	chr3	939	-1	3238	1944	23	1271	LSG1	TGA	TGAG	80.0673	79.6194	0	0.447929	715	711	0	4	24.7274	40.9565	0	0.352422	0.00860481	99	16	0	93	0	0
ENST00000547242.5	chr12	725	1	766	318	404	44	TMEM263	TGA	TGAA	42.2173	33.3707	8.39867	0.447929	377	298	75	4	55.114	104.939	20.7888	10.1802	0.0970104	36	1	0.335947	30	11.1982	0.106711
ENST00000454366.2	chr22	346	1	2938	2187	77	674	GTSE1	TAA	TAAG	107.055	105.263	1.56775	0.223964	956	940	14	2	36.4381	48.1314	20.3604	0.332292	0.00690384	24	7	0	18	0	0
ENST00000336294.10	chr1	403	1	1733	1446	103	184	TMEM39B	TGA	TGAG	20.2688	19.4849	0.783876	0	181	174	7	0	11.6958	13.475	7.61044	0	0	153	1	0	147	0	0
ENST00000372244.3	chr1	563	-1	1427	204	80	1143	TMEM53	TAG	TAGC	1.34379	1.11982	0.223964	0	12	10	2	0	0.941687	5.48933	2.79956	0	0	48	12	0	42	0	0
ENST00000536465.5	chr12	184	-1	2089	567	235	1287	RERG	TAG	TAGG	2.12766	1.67973	0.447929	0	19	15	4	0	1.01851	2.96249	1.90608	0	0	27	27	0	21	0	0
ENST00000343307.5	chr13	69	1	4170	1464	104	2602	B3GLCT	TAA	TAAA	22.7324	22.6204	0	0.111982	203	202	0	1	5.45141	15.4511	0	0.043037	0.00278537	39	57	0	33	0	0
ENST00000373284.10	chr9	505	-1	1455	933	18	504	TOR2A	TGA	TGAC	9.29453	9.29453	0	0	83	83	0	0	6.38799	9.96198	0	0	0	30	3	0	24	0	0
ENST00000640768.1	chrX	293	-1	1677	360	207	1110	SPIN3	TAA	TAAT	1.34379	0.671893	0.671893	0	12	6	6	0	0.801304	1.86637	3.24586	0	0	21	15	0	15	0	0
ENST00000393545.9	chr14	414	1	1955	1767	156	32	SPATA7	TAA	TAAT	4.81524	4.70325	0.111982	0	43	42	1	0	2.46304	2.66172	0.717835	0	0	33	1	0	27	0	0
ENST00000503974.5	chr4	394	1	2036	1419	97	520	PDLIM5	TAA	TAAT	57.8948	55.2072	2.57559	0.111982	517	493	23	1	28.4356	38.9057	26.5525	0.21535	0.00553518	33	15	0	27	0	0
ENST00000335867.4	chr14	252	1	2526	2478	18	30	DACT1	TGA	TGAG	4.81524	4.81524	0	0	43	43	0	0	1.90627	1.94319	0	0	0	18	1	0	12	0	0
ENST00000235345.6	chr1	716	-1	6148	1035	129	4984	SLC35D1	TGA	TGAC	9.63047	9.18254	0.223964	0.223964	86	82	2	2	1.56644	8.87202	1.73616	0.0449367	0.00506499	21	111	0	15	0	0
ENST00000436108.6	chr11	40	-1	1432	1149	198	85	CHID1	TAG	TAGG	54.6473	46.4726	8.1747	0	488	415	73	0	38.1615	40.4462	41.2864	0	0	57	1	0	51	0	0
ENST00000589880.1	chr19	56	-1	459	138	21	300	UQCR11	TAA	TAAT	64.0538	59.6865	3.1355	1.2318	572	533	28	11	139.551	432.511	149.31	4.10602	0.00949343	156	3	0.335947	150	2.23964	0.00517824
ENST00000257934.8	chr12	411	1	6578	6330	85	163	ESPL1	TAA	TAAC	112.766	111.646	1.11982	0	1007	997	10	0	17.1429	17.6376	13.1744	0	0	39	7	0	33	0	0
ENST00000378454.8	chr6	92	-1	4670	1398	303	2969	DCDC2	TAG	TAGA	3.8074	3.24749	0.559911	0	34	29	5	0	0.815288	2.32295	1.84789	0	0	42	65	0	36	0	0
ENST00000261881.9	chr15	289	-1	1683	873	49	761	TIPIN	TAA	TAAG	114.67	112.206	2.01568	0.447929	1024	1002	18	4	68.1342	128.529	41.1363	0.588606	0.00457954	30	13	0	24	0	0
ENST00000646527.1	chr1	1396	-1	3545	1461	172	1912	SLC19A2	TAA	TAAT	24.8601	21.6126	3.24749	0	222	193	29	0	7.01271	14.793	18.8807	0	0	132	43	0	126	0	0
ENST00000258960.7	chr17	649	1	4836	1458	7	3371	NMT1	TAA	TAAC	136.842	136.618	0	0.223964	1222	1220	0	2	28.2966	93.7026	0	0.0664386	0.000709037	120	30	0.223964	114	1.9646	0.0209664
ENST00000225655.5	chr17	86	-1	1246	390	614	242	PFN1	TGA	TGAC	605.152	586.787	16.2374	2.12766	5403	5239	145	19	485.676	1504.58	26.4453	8.79199	0.00584348	242	0	2.12766	236	9.01552	0.00599204
ENST00000564675.5	chr15	373	-1	1637	1050	357	230	SNUPN	TAA	TAAA	39.6417	36.0583	3.58343	0	354	322	32	0	24.2161	34.3412	10.0376	0	0	18	3	0	12	0	0
ENST00000374704.8	chr10	139	1	5023	993	539	3491	CCNY	TAA	TAAC	8.1747	5.71109	2.23964	0.223964	73	51	20	2	1.62745	5.75135	4.15519	0.0641548	0.0111547	36	63	0	30	0	0
ENST00000413366.8	chr17	854	1	8919	1986	233	6700	PRKCA	TGA	TGAA	22.3964	22.0605	0.223964	0.111982	200	197	2	1	2.51109	11.108	0.961221	0.0167138	0.00150466	60	97	0	54	0	0
ENST00000380420.10	chrX	62	-1	1229	840	190	199	PIR	TAG	TAGT	26.2038	24.7481	1.34379	0.111982	234	221	12	1	21.3213	29.462	7.07256	0.562725	0.0191	66	4	0.111982	60	1.86637	0.0633484
ENST00000311437.11	chr19	333	-1	6063	1557	127	4379	ZNF490	TAA	TAAG	7.61479	6.9429	0.559911	0.111982	68	62	5	1	1.25594	4.45915	4.40875	0.0255726	0.00573485	18	69	0	12	0	0
ENST00000382723.5	chr4	57	1	1895	879	229	787	MSX1	TAG	TAGA	7.05488	5.0392	1.9037	0.111982	63	45	17	1	3.72289	5.73288	8.31309	0.14229	0.02482	162	11	0.111982	156	0.717835	0.125214
ENST00000156109.7	chrX	216	-1	1613	1398	7	208	GPKOW	TGA	TGAC	42.6652	42.3293	0	0.335947	381	378	0	3	26.4509	30.2785	0	1.61513	0.0533425	189	1	0.335947	183	1.83577	0.0606297
ENST00000303775.10	chr21	34	-1	4816	612	16	4188	N6AMT1	TAG	TAGC	8.51065	8.06272	0.111982	0.335947	76	72	1	3	1.76716	13.1744	6.99889	0.0802165	0.00608883	54	70	0	48	0	0
ENST00000409668.1	chr2	414	-1	1731	783	462	486	TMEM150A	TAA	TAAG	2.57559	1.9037	0.671893	0	23	17	6	0	1.48792	2.43129	1.45431	0	0	231	2	0	225	0	0
ENST00000449187.6	chr7	625	1	2393	915	75	1403	CALU	TGA	TGAG	152.296	147.929	1.9037	2.46361	1360	1321	17	22	63.6422	161.671	25.3826	1.75596	0.0108613	33	19	0.111982	27	4.14749	0.025654
ENST00000376215.10	chr10	110	1	1539	1215	5	319	PDSS1	TGA	TGAC	29.8993	29.7873	0	0.111982	267	266	0	1	19.4277	24.5163	0	0.351042	0.0143187	48	8	0.111982	42	2.66624	0.108754
ENST00000308249.4	chr17	788	1	6515	2235	138	4142	PPM1E	TAA	TAAT	19.8209	19.037	0.783876	0	177	170	7	0	3.04234	8.51767	5.68026	0	0	21	91	0	15	0	0
ENST00000467148.1	chr20	454	-1	8019	7917	64	38	HELZ2	TGA	TGAA	8.1747	8.06272	0.111982	0	73	72	1	0	1.01942	1.01841	1.74972	0	0	38	0	0	32	0	0
ENST00000290200.7	chr21	93	1	1896	945	93	858	IL10RB	TAG	TAGG	6.60695	6.49497	0.111982	0	59	58	1	0	3.48468	6.87298	1.20411	0	0	66	13	0	60	0	0
ENST00000405636.6	chr19	865	1	1664	1053	98	513	AC011481.1	TGA	TGAG	134.267	133.931	0.223964	0.111982	1199	1196	2	1	80.6891	127.19	2.28535	0.218289	0.00171625	177	3	0	171	0	0
ENST00000372156.5	chr10	347	1	1335	780	496	59	TSPAN14	TGA	TGAG	17.9172	17.3572	0.559911	0	160	155	5	0	13.4211	22.2529	1.12885	0	0	27	1	0	21	0	0
ENST00000042381.9	chr16	566	1	4047	3627	103	317	RIPOR1	TAA	TAAA	26.9877	25.9799	1.00784	0	241	232	9	0	6.66857	7.16291	9.78486	0	0	75	1	0	69	0	0
ENST00000276202.8	chrX	521	1	6580	6189	57	334	DOCK11	TGA	TGAG	63.046	63.046	0	0	563	563	0	0	9.58146	10.1868	0	0	0	69	6	0	63	0	0
ENST00000373191.9	chr1	455	1	19615	2550	316	16749	AGO3	TAA	TAAA	16.4614	15.6775	0.783876	0	147	140	7	0	0.839225	6.14805	2.48062	0	0	42	356	0	36	0	0
ENST00000258821.8	chr14	16	-1	4692	1290	8	3394	TTC5	TGA	TGAC	39.1938	39.0818	0	0.111982	350	349	0	1	8.35332	30.296	0	0.0329942	0.00108906	78	58	0	72	0	0
ENST00000265978.8	chr11	128	-1	3436	2928	353	155	FAM160A2	TAA	TAAC	12.318	9.29453	3.02352	0	110	83	27	0	3.585	3.17436	8.56521	0	0	99	2	0	93	0	0
ENST00000265081.7	chr5	267	1	4398	3381	70	947	MSH3	TAA	TAAA	59.2386	59.2386	0	0	529	529	0	0	13.4694	17.521	0	0	0	39	26	0	33	0	0
ENST00000536178.3	chr7	506	1	2068	1995	-2	75	SH2B2	TAG	TAGC	6.04704	3.02352	3.02352	0	54	27	27	0	2.9241	1.51555	-1511.76	0	0	60	1	0	54	0	0
ENST00000327678.10	chr22	311	1	1292	912	59	321	SERHL2	TAG	TAGC	1.56775	1.45577	0.111982	0	14	13	1	0	1.21343	1.59624	1.898	0	0	57	6	0	51	0	0
ENST00000428638.5	chr17	657	-1	4197	2637	12	1548	ARHGAP27	TGA	TGAC	3.24749	3.02352	0	0.223964	29	27	0	2	0.773763	1.14658	0	0.14468	0.126184	108	17	0.111982	102	1.09787	0.957516
ENST00000336873.9	chr22	114	-1	3741	2094	503	1144	HPS4	TGA	TGAA	29.7873	17.1333	12.318	0.335947	266	153	110	3	7.96238	8.18208	24.4892	0.29366	0.0358906	18	18	0	12	0	0
ENST00000268607.9	chr16	719	1	2643	345	622	1676	MAP1LC3B	TAA	TAAA	75.2521	74.4682	0.559911	0.223964	672	665	5	2	28.4722	215.85	0.900179	0.13363	0.000619089	36	35	0	30	0	0
ENST00000376529.8	chrX	209	-1	820	642	4	174	SLC35A2	TGA	TGAT	13.9978	13.9978	0	0	125	125	0	0	17.0705	21.8034	0	0	0	21	5	0	15	0	0
ENST00000233072.9	chr2	941	1	5776	4470	190	1116	CPS1	TAG	TAGA	13.2139	13.2139	0	0	118	118	0	0	2.28773	2.95613	0	0	0	39	24	0	33	0	0
ENST00000374902.9	chr9	358	-1	3032	2757	174	101	TEX10	TGA	TGAA	123.964	120.493	3.1355	0.335947	1107	1076	28	3	40.8853	43.7044	18.0201	3.32621	0.076107	54	3	0.111982	48	2.33296	0.0533806
ENST00000331479.3	chr22	305	1	1522	291	68	1163	SMDT1	TAA	TAAC	31.243	30.6831	0.111982	0.447929	279	274	1	4	20.5276	105.44	1.6468	0.38515	0.00365277	33	17	0.111982	27	4.14749	0.039335
ENST00000307138.10	chr14	156	-1	7866	6219	463	1184	RALGAPA1	TAA	TAAG	32.1389	29.5633	2.57559	0	287	264	23	0	4.0858	4.75371	5.56283	0	0	33	24	0	27	0	0
ENST00000269886.7	chr19	135	-1	2471	1074	173	1224	SH3GL1	TGA	TGAC	52.8556	47.0325	4.70325	1.11982	472	420	42	10	21.3904	43.7919	27.1864	0.914888	0.0208917	228	6	0.895858	222	4.0354	0.0921493
ENST00000258646.3	chr13	154	-1	3771	1563	38	2170	RCBTB1	TGA	TGAA	13.6618	12.9899	0.559911	0.111982	122	116	5	1	3.62287	8.3109	14.7345	0.0516047	0.00620928	27	50	0.111982	21	5.33249	0.641626
ENST00000267973.7	chr15	397	-1	1157	885	81	191	WDR61	TAA	TAAA	168.757	161.926	6.60695	0.223964	1507	1446	59	2	145.858	182.968	81.5673	1.17259	0.00640872	81	3	0.223964	75	2.98619	0.0163209
ENST00000216146.9	chr22	263	-1	1251	1179	20	52	RPL3	TAA	TAAT	753.864	752.297	0.895858	0.671893	6732	6718	8	6	602.609	638.08	44.7929	12.921	0.0202498	39	1	0.671893	33	20.3604	0.0319088
ENST00000435359.5	chr17	38	-1	5179	3897	80	1202	CLUH	TAG	TAGA	157.895	156.887	0.783876	0.223964	1410	1401	7	2	30.4875	40.2584	9.79845	0.186327	0.00462826	198	8	0	192	0	0
ENST00000642475.1	chr13	238	1	3813	1959	1284	570	TM9SF2	TGA	TGAA	323.517	308.287	11.3102	3.91938	2889	2753	101	35	84.8457	157.37	8.80857	6.8761	0.043694	39	16	0.895858	33	27.1472	0.172506
ENST00000325680.12	chr14	365	1	8150	6408	168	1574	YLPM1	TGA	TGAG	36.6182	36.1703	0.223964	0.223964	327	323	2	2	4.49303	5.64455	1.33312	0.14229	0.0252084	60	34	0.223964	54	4.14749	0.734778
ENST00000381070.8	chr5	181	1	2020	1386	211	423	CWC27	TAA	TAAA	60.3584	57.3349	2.91154	0.111982	539	512	26	1	29.8804	41.3672	13.7988	0.264733	0.0063996	93	8	0	87	0	0
ENST00000396124.9	chr8	394	1	1750	969	14	767	NDUFAF6	TAA	TAAA	9.07056	8.8466	0.111982	0.111982	81	79	1	1	5.18318	9.12962	7.99873	0.146	0.0159919	39	11	0	33	0	0
ENST00000424785.7	chr2	800	-1	2831	636	95	2100	FKBP7	TAG	TAGC	22.2845	21.9485	0.111982	0.223964	199	196	1	2	7.87159	34.5103	1.17876	0.10665	0.00309038	30	39	0	24	0	0
ENST00000371655.4	chr1	629	-1	12735	627	143	11965	RAB3B	TAG	TAGG	5.82308	5.15118	0.559911	0.111982	52	46	5	1	0.45725	8.2156	3.91546	0.00935915	0.00113919	126	196	0	120	0	0
ENST00000421176.4	chr19	844	1	4291	1749	195	2347	ZNF284	TAA	TAAT	4.14334	3.58343	0.447929	0.111982	37	32	4	1	0.965589	2.04885	2.29707	0.0477129	0.0232877	138	43	0.111982	132	0.84835	0.414062
ENST00000389793.6	chr1	1792	-1	13435	11373	169	1893	LYST	TGA	TGAA	18.5891	16.9093	1.67973	0	166	151	15	0	1.38363	1.4868	9.93925	0	0	36	27	0	30	0	0
ENST00000237853.9	chr5	304	-1	5781	1890	124	3767	ELL2	TAG	TAGA	10.4143	8.06272	1.9037	0.447929	93	72	17	4	1.80148	4.26599	15.3524	0.118909	0.0278736	30	75	0	24	0	0
ENST00000348462.6	chr9	479	-1	407	339	39	29	RPL35	TGA	TGAG	640.203	635.051	3.47145	1.67973	5717	5671	31	15	1572.98	1873.31	89.0115	57.9219	0.0309196	18	2	1.67973	12	139.978	0.0747223
ENST00000296849.9	chr5	11	1	2110	1323	223	564	NKD2	TAG	TAGC	3.91938	3.1355	0.671893	0.111982	35	28	6	1	1.85753	2.36999	3.01298	0.19855	0.0837766	243	9	0.111982	237	0.472499	0.199367
ENST00000394056.6	chr6	423	1	2725	1827	489	409	KLC4	TGA	TGAC	19.9328	18.813	0.783876	0.335947	178	168	7	3	7.3148	10.2972	1.60302	0.821386	0.0797677	219	3	0.335947	213	1.57721	0.153169
ENST00000405785.5	chr7	64	1	3050	2595	330	125	MIOS	TAA	TAAA	41.0975	39.3058	1.67973	0.111982	367	351	15	1	13.4746	15.1467	5.0901	0.895858	0.0591453	45	3	0	39	0	0
ENST00000249837.7	chr15	243	-1	13255	11100	93	2062	VPS13C	TAA	TAAT	66.6294	66.5175	0	0.111982	595	594	0	1	5.02674	5.99256	0	0.0543076	0.0090625	57	53	0	51	0	0
ENST00000381401.11	chrX	7	-1	1406	864	98	444	SLC25A6	TAA	TAAG	151.96	149.384	2.12766	0.447929	1357	1334	19	4	108.08	172.899	21.7108	1.00885	0.00583492	132	3	0.335947	126	2.66624	0.0154209
ENST00000357103.5	chr12	12	1	3926	1128	202	2596	ADIPOR2	TGA	TGAT	34.4905	32.1389	1.67973	0.671893	308	287	15	6	8.78516	28.4919	8.31551	0.258819	0.00908393	75	41	0.111982	69	1.62293	0.0569611
ENST00000261643.8	chr17	227	1	2853	1299	96	1458	COX10	TGA	TGAG	12.542	11.7581	0.783876	0	112	105	7	0	4.39608	9.05168	8.16537	0	0	135	11	0	129	0	0
ENST00000652299.1	chr11	322	-1	5682	1203	71	4408	ALX4	TGA	TGAC	8.73462	8.1747	0.111982	0.447929	78	73	1	4	1.53724	6.79527	1.57721	0.101617	0.0149541	333	59	0.335947	327	1.02736	0.151188
ENST00000314358.10	chr5	458	1	6679	5253	105	1321	KDM3B	TAG	TAGG	135.611	135.275	0.335947	0	1211	1208	3	0	20.304	25.7519	3.19949	0	0	171	21	0	165	0	0
ENST00000617633.5	chr17	432	-1	6338	1767	20	4551	DDX52	TAA	TAAA	188.578	188.578	0	0	1684	1684	0	0	29.7536	106.722	0	0	0	54	97	0	48	0	0
ENST00000216121.11	chr22	139	-1	2192	822	249	1121	NIPSNAP1	TGA	TGAT	94.9609	94.2891	0.111982	0.559911	848	842	1	5	43.3216	114.707	0.449728	0.499475	0.00435436	144	16	0.223964	138	1.62293	0.0141485
ENST00000336665.9	chr2	1096	1	5382	2382	574	2426	AGAP1	TGA	TGAG	10.1904	8.39867	1.79172	0	91	75	16	0	1.89342	3.52589	3.12146	0	0	81	40	0	75	0	0
ENST00000392650.8	chr17	886	-1	11034	6486	351	4197	SDK2	TGA	TGAC	21.7246	20.8287	0.783876	0.111982	194	186	7	1	1.96887	3.21133	2.23326	0.0266815	0.00830855	183	40	0	177	0	0
ENST00000296679.9	chr5	245	-1	3633	1347	90	2196	WDR41	TAG	TAGT	65.9575	64.6138	1.2318	0.111982	589	577	11	1	18.1551	47.9686	13.6867	0.0509937	0.00106306	36	48	0	30	0	0
ENST00000361991.6	chr5	371	1	2379	1311	24	1044	CSNK1G3	TGA	TGAC	22.2845	21.8365	0.223964	0.223964	199	195	2	2	9.36716	16.6564	9.33185	0.214525	0.0128795	57	20	0.111982	51	2.19573	0.131825
ENST00000510080.1	chr5	466	1	813	351	186	276	PAIP2	TGA	TGAG	91.6015	88.242	3.02352	0.335947	818	788	27	3	112.671	251.402	16.2555	1.2172	0.00484165	30	6	0.111982	24	4.66593	0.0185596
ENST00000375135.4	chrX	272	-1	4298	2853	796	649	FGD1	TAG	TAGA	12.9899	8.39867	4.59127	0	116	75	41	0	3.02232	2.9438	5.76793	0	0	99	4	0	93	0	0
ENST00000569842.5	chr16	487	1	2789	2610	90	89	NUP93	TAG	TAGG	230.012	229.34	0.671893	0	2054	2048	6	0	82.471	87.8696	7.46548	0	0	75	1	0	69	0	0
ENST00000216259.8	chr22	291	-1	1197	756	29	412	PMM1	TGA	TGAC	14.3337	14.3337	0	0	128	128	0	0	11.9747	18.96	0	0	0	33	3	0	27	0	0
ENST00000250076.7	chr17	94	-1	2134	1302	649	183	ZNF232	TGA	TGAA	7.27885	6.9429	0.223964	0.111982	65	62	2	1	3.41089	5.33249	0.345092	0.611925	0.114754	45	6	0.111982	39	2.87134	0.538462
ENST00000374423.9	chr2	913	1	10240	7032	380	2828	ZDBF2	TAG	TAGA	39.8657	38.2979	1.45577	0.111982	356	342	13	1	3.89313	5.44624	3.83097	0.0395977	0.00727065	24	51	0	18	0	0
ENST00000643460.1	chr7	131	-1	2166	975	70	1121	HOXA1	TGA	TGAG	10.1904	7.72678	2.46361	0	91	69	22	0	4.7047	7.9249	35.1944	0	0	360	17	0	354	0	0
ENST00000543589.5	chr12	933	1	587	450	23	114	PXMP2	TAA	TAAA	5.71109	5.59911	0	0.111982	51	50	0	1	9.72929	12.4425	0	0.9823	0.0789474	51	2	0	45	0	0
ENST00000354570.7	chr6	778	-1	4107	2217	405	1485	MAP7	TGA	TGAG	22.2845	22.1725	0.111982	0	199	198	1	0	5.42597	10.0011	0.276499	0	0	27	37	0	21	0	0
ENST00000403733.8	chr4	660	1	8817	3546	229	5042	WWC2	TGA	TGAT	17.2453	15.5655	1.67973	0	154	139	15	0	1.95591	4.3896	7.33508	0	0	45	104	0	39	0	0
ENST00000273047.9	chr3	97	1	2473	615	512	1346	RAB5A	TAA	TAAA	34.4905	24.6361	9.85444	0	308	220	88	0	13.9468	40.0587	19.2469	0	0	18	33	0	12	0	0
ENST00000266025.4	chr3	320	-1	2062	1023	452	587	TMEM115	TAA	TAAC	50.392	29.1154	21.2766	0	450	260	190	0	24.4384	28.4608	47.0722	0	0	48	5	0	42	0	0
ENST00000534182.2	chr11	997	1	1624	219	106	1299	ARCN1	TAG	TAGA	37.962	32.2509	5.48713	0.223964	339	288	49	2	23.3756	147.264	51.7654	0.172413	0.00117077	45	23	0	39	0	0
ENST00000374884.2	chrX	299	-1	4072	717	519	2836	SPIN4	TAA	TAAA	45.3528	32.1389	12.9899	0.223964	405	287	116	2	11.1377	44.8241	25.0288	0.078972	0.00176182	18	57	0.111982	12	9.33185	0.208188
ENST00000383836.8	chr3	19	-1	8878	3267	689	4922	SRGAP3	TGA	TGAC	5.37515	3.35947	2.01568	0	48	30	18	0	0.605446	1.0283	2.92552	0	0	87	74	0	81	0	0
ENST00000316398.5	chr11	820	-1	2303	1092	59	1152	CCDC89	TAG	TAGG	1.9037	1.67973	0.111982	0.111982	17	15	1	1	0.826617	1.53822	1.898	0.0972068	0.0631944	72	19	0.111982	66	1.6967	1.10303
ENST00000371144.7	chrX	566	1	4236	3663	274	299	STAG2	TAA	TAAT	473.573	448.377	24.972	0.223964	4229	4004	223	2	111.797	122.407	91.1388	0.749045	0.0061193	60	10	0.223964	54	4.14749	0.0338828
ENST00000378755.9	chr1	35	1	2567	1872	88	607	ATAD3A	TGA	TGAG	79.1714	77.9396	0.559911	0.671893	707	696	5	6	30.842	41.6344	6.36263	1.10691	0.0265864	186	7	0.671893	180	3.73274	0.0896552
ENST00000422556.1	chr20	357	-1	4093	1530	344	2219	SPATA2	TAG	TAGA	6.71893	6.38299	0.335947	0	60	57	3	0	1.64157	4.17189	0.976589	0	0	81	32	0	75	0	0
ENST00000408923.8	chr5	720	1	2278	1668	95	515	RGS14	TGA	TGAC	6.27101	5.71109	0	0.559911	56	51	0	5	2.75286	3.42392	0	1.08721	0.317533	489	1	0.559911	483	1.15924	0.33857
ENST00000419716.7	chr8	307	1	4652	2583	555	1514	SULF1	TAA	TAAT	7.61479	6.71893	0.895858	0	68	60	8	0	1.63689	2.60121	1.61416	0	0	63	37	0	57	0	0
ENST00000323076.7	chr13	136	-1	3598	1851	85	1662	LCP1	TGA	TGAG	21.3886	20.7167	0.671893	0	191	185	6	0	5.94458	11.1922	7.90463	0	0	42	18	0	36	0	0
ENST00000458591.6	chr14	133	1	2314	1896	221	197	SCFD1	TAA	TAAC	137.066	136.842	0	0.223964	1224	1222	0	2	59.2335	72.1742	0	1.13688	0.0157518	21	5	0	15	0	0
ENST00000331173.5	chr10	210	-1	4060	1818	36	2206	CSTF2T	TGA	TGAA	84.6586	83.6507	1.00784	0	756	747	9	0	20.8519	46.0125	27.9956	0	0	27	47	0	21	0	0
ENST00000232496.5	chr3	316	-1	1624	300	118	1206	TUSC2	TGA	TGAC	14.6697	6.60695	6.60695	1.45577	131	59	59	13	9.03305	22.0232	55.9911	1.20711	0.0548107	111	14	0.223964	105	2.133	0.0968523
ENST00000356218.8	chr14	208	1	4723	1812	487	2424	FRMD6	TAA	TAAA	23.1803	21.0527	2.12766	0	207	188	19	0	4.90797	11.6185	4.36892	0	0	123	44	0	117	0	0
ENST00000327443.9	chr12	416	1	7635	2325	110	5200	SP1	TGA	TGAG	119.597	118.365	0.335947	0.895858	1068	1057	3	8	15.6643	50.9098	3.05406	0.17228	0.00338403	105	90	0.335947	99	3.3934	0.0666552
ENST00000609923.6	chr10	250	-1	6536	966	142	5428	SLC25A16	TAA	TAAA	4.81524	4.03136	0.559911	0.223964	43	36	5	2	0.736725	4.17325	3.94304	0.041261	0.00988701	27	123	0	21	0	0
ENST00000319550.9	chr6	690	1	6874	1335	72	5467	NT5DC1	TAA	TAAG	101.792	101.12	0.335947	0.335947	909	903	3	3	14.8082	75.7453	4.66593	0.0614499	0.000811271	21	132	0.111982	15	7.46548	0.0985604
ENST00000410092.7	chr18	47	-1	5488	2196	173	3119	SPIRE1	TGA	TGAG	16.5734	15.1176	1.00784	0.447929	148	135	9	4	3.01993	6.88415	5.82567	0.143613	0.0208614	60	60	0.111982	54	2.07375	0.301235
ENST00000593209.5	chr17	571	-1	1782	1407	158	217	GHDC	TGA	TGAG	17.3572	14.8936	2.46361	0	155	133	22	0	9.74032	10.5854	15.5925	0	0	90	2	0	84	0	0
ENST00000269844.4	chr21	142	-1	4836	4491	105	240	PRDM15	TGA	TGAG	7.50281	7.50281	0	0	67	67	0	0	1.55145	1.67063	0	0	0	108	3	0	102	0	0
ENST00000405858.6	chr7	59	-1	5030	2061	560	2409	ZNF12	TGA	TGAA	18.4771	17.1333	1.2318	0.111982	165	153	11	1	3.67337	8.31309	2.19965	0.046485	0.00559178	63	50	0	57	0	0
ENST00000389617.8	chr3	433	1	3215	1299	155	1761	GXYLT2	TGA	TGAA	4.36731	3.8074	0.223964	0.335947	39	34	2	3	1.35842	2.93102	1.44493	0.19077	0.0650867	39	35	0	33	0	0
ENST00000233623.9	chr2	374	1	3190	1527	1	1662	TTC31	TGA	TGAG	8.39867	8.39867	0	0	75	75	0	0	2.63281	5.50011	0	0	0	21	28	0	15	0	0
ENST00000375712.4	chr20	176	1	6071	2211	174	3686	KIF3B	TAA	TAAA	11.5342	10.7503	0.783876	0	103	96	7	0	1.89988	4.86219	4.50503	0	0	108	57	0	102	0	0
ENST00000251691.5	chr6	788	1	14814	6501	142	8171	ARFGEF3	TAG	TAGC	13.5499	13.4379	0	0.111982	121	120	0	1	0.914665	2.06705	0	0.0137048	0.00663016	87	183	0	81	0	0
ENST00000523213.1	chr5	641	-1	2439	1752	515	172	ZBED8	TAA	TAAG	13.5499	11.9821	1.34379	0.223964	121	107	12	2	5.55549	6.8391	2.6093	1.30212	0.190393	18	9	0.111982	12	9.33185	1.36449
ENST00000370706.9	chr6	522	1	5043	3153	60	1830	ZNF451	TAA	TAAT	29.7873	29.3393	0.447929	0	266	262	4	0	5.90666	9.30522	7.46548	0	0	36	36	0	30	0	0
ENST00000454963.5	chr3	271	-1	1804	1182	202	420	PRKAR2A	TAG	TAGC	84.8825	79.2834	5.37515	0.223964	758	708	48	2	47.0524	67.0757	26.6096	0.533249	0.00794996	90	5	0	84	0	0
ENST00000405878.5	chr22	293	1	2155	1797	140	218	XRCC6	TGA	TGAC	1156.33	1145.24	9.29453	1.79172	10326	10227	83	16	536.579	637.308	66.3895	8.21888	0.0128962	87	4	1.79172	81	22.12	0.0347084
ENST00000412916.6	chr16	544	1	2926	531	157	2238	CBFB	TAA	TAAT	34.8265	32.4749	2.12766	0.223964	311	290	19	2	11.9024	61.1579	13.552	0.100074	0.00163631	66	53	0	60	0	0
ENST00000554736.5	chr14	209	1	524	183	131	210	GNG2	TAA	TAAG	2.35163	1.67973	0.671893	0	21	15	6	0	4.48784	9.17887	5.12896	0	0	51	7	0	45	0	0
ENST00000341871.7	chr17	216	-1	3061	450	459	2152	TMEM220	TAA	TAAA	0.559911	0.559911	0	0	5	5	0	0	0.182918	1.24425	0	0	0	30	50	0	24	0	0
ENST00000591399.5	chr17	938	-1	2180	753	419	1008	WBP2	TAG	TAGG	73.1244	72.7885	0.223964	0.111982	653	650	2	1	33.5433	96.6646	0.534521	0.111094	0.00114927	585	5	0.111982	579	0.193406	0.0020008
ENST00000493615.5	chr3	510	1	1831	1431	246	154	NECTIN3	TGA	TGAT	30.0112	30.0112	0	0	268	268	0	0	16.3906	20.9722	0	0	0	96	2	0	90	0	0
ENST00000561610.1	chr16	360	1	1288	891	147	250	PPP4C	TGA	TGAC	186.226	181.075	5.15118	0	1663	1617	46	0	144.586	203.227	35.0421	0	0	250	0	0	244	0	0
ENST00000518721.6	chr8	509	-1	6214	3357	236	2621	ASAP1	TAG	TAGC	29.0034	27.9956	0.783876	0.223964	259	250	7	2	4.66743	8.33946	3.32151	0.08545	0.0102465	18	40	0	12	0	0
ENST00000618787.5	chr19	837	1	5639	2007	262	3370	ZNF283	TGA	TGAT	5.82308	4.36731	1.2318	0.223964	52	39	11	2	1.03264	2.17604	4.70154	0.0664583	0.030541	156	79	0.223964	150	1.4931	0.686154
ENST00000330560.8	chr8	133	1	3441	3039	235	167	CDCA2	TAA	TAAT	62.4861	59.5746	2.91154	0	558	532	26	0	18.1593	19.6033	12.3895	0	0	126	3	0	120	0	0
ENST00000438132.7	chr16	248	1	3810	3126	42	642	VPS35L	TGA	TGAC	57.1109	57.1109	0	0	510	510	0	0	14.9897	18.2697	0	0	0	69	12	0	63	0	0
ENST00000371589.9	chr9	673	1	2662	2067	9	586	MAN1B1	TAG	TAGG	27.3237	27.0997	0	0.223964	244	242	0	2	10.2643	13.1106	0	0.382192	0.0291513	114	9	0	108	0	0
ENST00000582783.5	chr19	746	-1	3583	1236	7	2340	C19orf47	TAG	TAGC	5.37515	5.26317	0	0.111982	48	47	0	1	1.50018	4.25822	0	0.0478557	0.0112384	126	26	0	120	0	0
ENST00000222330.8	chr19	798	-1	2148	1419	131	598	GSK3A	TGA	TGAG	43.4491	41.9933	1.34379	0.111982	388	375	12	1	20.2277	29.5936	10.2579	0.187261	0.00632776	123	5	0	117	0	0
ENST00000358679.3	chr13	204	1	2030	885	144	1001	SLAIN1	TAA	TAAT	44.345	41.0975	3.24749	0	396	367	29	0	21.8448	46.4378	22.552	0	0	21	27	0	15	0	0
ENST00000330263.5	chr1	228	1	2004	687	25	1292	MRTO4	TGA	TGAA	115.118	112.206	2.23964	0.671893	1028	1002	20	6	57.444	163.328	89.5858	0.520041	0.00318403	126	17	0.447929	120	3.73274	0.0228543
ENST00000309863.10	chr2	534	1	7492	5022	708	1762	GCC2	TAG	TAGG	86.8982	86.6743	0.223964	0	776	774	2	0	11.5988	17.2589	0.316334	0	0	147	36	0	141	0	0
ENST00000328024.11	chr19	234	1	1545	624	51	870	RAB11B	TGA	TGAC	52.0717	51.3999	0.447929	0.223964	465	459	4	2	33.7034	82.3716	8.78292	0.25743	0.00312523	114	4	0.223964	108	2.07375	0.0251755
ENST00000332235.8	chr19	3	-1	3054	1233	176	1645	C2CD4C	TAG	TAGA	1.56775	1.34379	0.111982	0.111982	14	12	1	1	0.513344	1.08985	0.636263	0.0680743	0.062462	405	7	0.111982	399	0.280657	0.257519
ENST00000305988.5	chr5	559	1	3398	1209	1581	608	ADRB2	TAA	TAAA	2.35163	1.67973	0.559911	0.111982	21	15	5	1	0.692062	1.38936	0.35415	0.184181	0.132566	60	7	0	54	0	0
ENST00000590954.5	chr18	171	-1	1294	837	258	199	TXNL1	TAA	TAAG	119.373	112.43	6.38299	0.559911	1066	1004	57	5	92.2512	134.325	24.7403	2.81362	0.0209464	63	3	0.447929	57	7.8584	0.0585028
ENST00000359894.6	chr19	19	-1	2342	2208	58	76	PLPPR3	TAG	TAGC	2.68757	2.68757	0	0	24	24	0	0	1.14756	1.2172	0	0	0	76	0	0	70	0	0
ENST00000602845.2	chr3	965	1	825	267	37	521	NCBP2-AS2	TAA	TAAT	9.63047	8.73462	0.111982	0.783876	86	78	1	7	11.6733	32.7139	3.02655	1.50456	0.0459914	141	12	0.559911	135	4.14749	0.126781
ENST00000297145.9	chr7	567	-1	3895	1185	119	2591	BMT2	TAA	TAAT	8.62263	8.39867	0.223964	0	77	75	2	0	2.21377	7.08748	1.88205	0	0	69	54	0	63	0	0
ENST00000252071.8	chr7	769	-1	1173	600	184	389	ACTR3C	TGA	TGAG	2.91154	2.79956	0.111982	0	26	25	1	0	2.48213	4.66593	0.608599	0	0	150	5	0	144	0	0
ENST00000320451.6	chr19	256	-1	1518	1140	226	152	ZNF121	TGA	TGAA	60.9183	51.9598	8.73462	0.223964	544	464	78	2	40.1307	45.5787	38.6487	1.47345	0.0323276	39	5	0.111982	33	3.3934	0.0744514
ENST00000316045.9	chr10	432	1	7232	4419	851	1962	ZNF518A	TAG	TAGT	43.5611	37.5141	5.82308	0.223964	389	335	52	2	6.02338	8.48926	6.84263	0.114151	0.0134465	126	33	0.111982	120	0.933185	0.109925
ENST00000304231.12	chr15	432	-1	1945	1032	187	726	HOMER2	TAG	TAGG	7.05488	6.04704	0.783876	0.223964	63	54	7	2	3.62719	5.85954	4.19185	0.308491	0.0526477	30	6	0	24	0	0
ENST00000369536.10	chr6	596	-1	2197	1704	24	469	RARS2	TAA	TAAT	42.2173	41.9933	0.111982	0.111982	377	375	1	1	19.2159	24.644	4.66593	0.238768	0.0096887	54	3	0.111982	48	2.33296	0.0946667
ENST00000372106.5	chrX	493	1	2517	396	125	1996	NXT2	TAA	TAAA	12.0941	10.1904	1.9037	0	108	91	17	0	4.80496	25.7333	15.2296	0	0	111	42	0	105	0	0
ENST00000424542.7	chr16	85	1	2115	981	98	1036	SLC9A3R2	TGA	TGAG	14.3337	13.6618	0.671893	0	128	122	6	0	6.77718	13.9264	6.85606	0	0	138	8	0	132	0	0
ENST00000370025.9	chr1	866	1	4786	1608	276	2902	PRPF38B	TGA	TGAA	92.9453	80.2913	12.2061	0.447929	830	717	109	4	19.4202	49.9324	44.2249	0.154352	0.00309122	42	61	0.223964	36	6.22124	0.124593
ENST00000378494.8	chr2	222	1	1467	939	55	473	CAMKMT	TAG	TAGA	15.6775	15.0056	0.671893	0	140	134	6	0	10.6868	15.9804	12.2162	0	0	75	8	0	69	0	0
ENST00000615206.4	chr12	481	-1	5171	921	313	3937	RNF41	TAA	TAAG	19.2609	8.28669	10.8623	0.111982	172	74	97	1	3.7248	8.99749	34.7038	0.0284435	0.00316128	90	53	0	84	0	0
ENST00000344646.9	chr10	168	-1	3196	2151	210	835	ZFAND4	TAA	TAAC	5.71109	4.81524	0.895858	0	51	43	8	0	1.78695	2.2386	4.26599	0	0	45	14	0	39	0	0
ENST00000357332.7	chr19	343	1	1235	1014	8	213	ASNA1	TAG	TAGC	68.7571	68.7571	0	0	614	614	0	0	55.6738	67.8078	0	0	0	93	1	0	87	0	0
ENST00000370859.7	chr1	741	-1	3851	2121	140	1590	SLC44A5	TAG	TAGA	14.4457	14.4457	0	0	129	129	0	0	3.75116	6.8108	0	0	0	246	35	0	240	0	0
ENST00000529710.5	chr11	704	1	3183	2343	271	569	PPP6R3	TAA	TAAG	127.548	118.925	8.51065	0.111982	1139	1062	76	1	40.0716	50.7576	31.4046	0.196805	0.00387735	450	2	0.111982	444	0.252212	0.00496895
ENST00000651854.1	chr11	668	-1	5092	3504	1245	343	PC	TGA	TGAT	32.2509	30.2352	1.9037	0.111982	288	270	17	1	6.33364	8.62877	1.52907	0.326479	0.0378361	343	0	0.111982	337	0.332292	0.0385097
ENST00000261965.8	chr13	275	-1	3834	2691	167	976	TUBGCP3	TGA	TGAA	23.0683	22.3964	0.671893	0	206	200	6	0	6.01678	8.32272	4.02331	0	0	195	16	0	189	0	0
ENST00000369075.8	chr10	610	1	7103	2970	47	4086	SEC23IP	TGA	TGAT	131.243	131.019	0.223964	0	1172	1170	2	0	18.4771	44.1142	4.7652	0	0	66	87	0	60	0	0
ENST00000324439.9	chr4	305	-1	4641	753	393	3495	RCHY1	TGA	TGAC	44.345	43.6731	0.223964	0.447929	396	390	2	4	9.55505	57.9988	0.569884	0.128163	0.00220975	129	70	0.447929	123	3.6417	0.0627892
ENST00000356800.6	chr7	795	-1	1624	1380	123	121	SMARCD3	TAG	TAGG	10.5263	10.3024	0.223964	0	94	92	2	0	6.48173	7.46548	1.82085	0	0	121	0	0	115	0	0
ENST00000368594.8	chr10	671	1	2955	1206	304	1445	INPP5A	TGA	TGAC	12.9899	9.96642	2.91154	0.111982	116	89	26	1	4.39592	8.26403	9.57743	0.0774964	0.00937755	81	26	0	75	0	0
ENST00000321685.7	chr11	568	1	1243	693	459	91	DNAJC4	TGA	TGAG	3.58343	2.12766	1.45577	0	32	19	13	0	2.88289	3.07022	3.17161	0	0	84	1	0	78	0	0
ENST00000368576.8	chr6	701	-1	2122	1704	210	208	ZUP1	TGA	TGAA	52.7436	48.0404	4.70325	0	471	429	42	0	24.8556	28.1927	22.3964	0	0	66	6	0	60	0	0
ENST00000316059.7	chr11	439	1	5731	1680	213	3838	ZFP91	TAG	TAGT	35.6104	33.9306	1.34379	0.335947	318	303	12	3	6.21364	20.1968	6.30886	0.0875317	0.00433394	54	66	0	48	0	0
ENST00000256578.7	chr1	890	1	3854	2607	354	893	AMPD2	TGA	TGAG	53.3036	52.9676	0.223964	0.111982	476	473	2	1	13.8307	20.3175	0.632668	0.1254	0.00617204	366	10	0.111982	360	0.311062	0.0153101
ENST00000263776.8	chr11	320	1	2317	1473	428	416	ACCS	TGA	TGAG	2.23964	1.56775	0.671893	0	20	14	6	0	0.966614	1.06433	1.56984	0	0	210	4	0	204	0	0
ENST00000233714.8	chr2	940	-1	1602	1167	69	366	LANCL1	TGA	TGAA	72.2286	71.8926	0.223964	0.111982	645	642	2	1	45.0865	61.6046	3.24586	0.305962	0.00496655	63	5	0.111982	57	1.9646	0.0318905
ENST00000591776.5	chr17	549	1	752	333	146	273	EIF1	TAA	TAAC	494.29	472.901	18.813	2.57559	4414	4223	168	23	657.3	1420.12	128.856	9.4344	0.00664337	21	7	0	15	0	0
ENST00000216840.10	chr14	113	-1	2043	1671	301	71	RABGGTA	TAA	TAAG	28.6675	27.4357	1.11982	0.111982	256	245	10	1	14.032	16.4187	3.72034	1.57721	0.0960621	30	2	0	24	0	0
ENST00000553458.5	chr14	354	-1	5454	1575	93	3786	ALDH6A1	TAG	TAGA	33.2587	33.1467	0.111982	0	297	296	1	0	6.09804	21.0456	1.20411	0	0	33	65	0	27	0	0
ENST00000602719.5	chr16	709	-1	957	198	216	543	C16orf74	TGA	TGAA	0.783876	0.223964	0.559911	0	7	2	5	0	0.819097	1.13113	2.59218	0	0	63	9	0	57	0	0
ENST00000502906.5	chr5	714	1	2593	2376	167	50	FGFR4	TGA	TGAG	11.0862	10.9743	0.111982	0	99	98	1	0	4.27545	4.6188	0.670552	0	0	50	0	0	44	0	0
ENST00000616140.2	chr8	595	-1	4435	4299	55	81	CPSF1	TAG	TAGC	98.4324	97.9845	0.447929	0	879	875	4	0	22.1945	22.7924	8.14416	0	0	87	1	0	81	0	0
ENST00000612956.4	chr13	202	-1	1497	795	60	642	MYCBP2	TAA	TAAA	9.40651	8.8466	0.447929	0.111982	84	79	4	1	6.28357	11.1278	7.46548	0.174427	0.0156749	42	14	0	36	0	0
ENST00000325748.9	chr2	798	-1	1725	909	139	677	PRKRA	TAA	TAAA	22.9564	22.0605	0.671893	0.223964	205	197	6	2	13.308	24.269	4.83377	0.330819	0.0136314	102	17	0.111982	96	1.16648	0.0480647
ENST00000334743.9	chr14	500	1	4283	1542	42	2699	PPP2R5C	TAG	TAGC	82.9788	74.0203	8.73462	0.223964	741	661	78	2	19.374	48.0028	207.967	0.0829805	0.00172866	129	45	0	123	0	0
ENST00000380763.7	chrX	37	1	955	774	118	63	HCCS	TAA	TAAA	47.5925	40.8735	6.49497	0.223964	425	365	58	2	49.835	52.8082	55.0421	3.55499	0.067319	27	3	0	21	0	0
ENST00000366994.8	chr1	1657	-1	4385	2856	114	1415	INTS7	TAA	TAAC	122.509	121.613	0.783876	0.111982	1094	1086	7	1	27.9381	42.5815	6.8761	0.0791394	0.00185854	78	30	0.111982	72	1.55531	0.0365255
ENST00000308020.6	chr11	16	1	2413	1431	171	811	PTDSS2	TGA	TGAC	34.4905	32.9228	1.34379	0.223964	308	294	12	2	14.2936	23.0068	7.8584	0.276158	0.0120033	576	2	0.223964	570	0.39292	0.0170784
ENST00000260129.5	chr8	262	1	3737	2529	471	737	TGS1	TAA	TAAC	59.9105	58.5667	1.34379	0	535	523	12	0	16.0317	23.1581	2.85305	0	0	54	11	0	48	0	0
ENST00000296786.8	chr5	633	1	2134	924	111	1099	UBLCP1	TAG	TAGT	106.943	102.352	3.8074	0.783876	955	914	34	7	50.1139	110.77	34.3009	0.713263	0.00643911	36	30	0.447929	30	14.931	0.134792
ENST00000527275.5	chr11	132	1	2143	1860	118	165	SMPD1	TAG	TAGG	7.16686	6.9429	0.111982	0.111982	64	62	1	1	3.34431	3.73274	0.949002	0.67868	0.181818	33	4	0	27	0	0
ENST00000466681.1	chr7	113	1	2999	672	147	2180	MALSU1	TAA	TAAA	48.7123	48.1524	0.447929	0.111982	435	430	4	1	16.2428	71.6553	3.04714	0.051368	0.000716876	42	45	0.111982	36	3.11062	0.0434109
ENST00000396954.8	chr5	138	-1	4121	534	670	2917	MOCS2	TAA	TAAT	50.8399	17.9172	32.5868	0.335947	454	160	291	3	12.3368	33.5527	48.6371	0.115169	0.00343246	54	73	0.111982	48	2.33296	0.0695312
ENST00000344895.4	chr5	330	1	2565	447	172	1946	TSLP	TAA	TAAA	2.01568	1.9037	0	0.111982	18	17	0	1	0.78584	4.25883	0	0.0575448	0.0135119	54	40	0	48	0	0
ENST00000356162.5	chr7	668	-1	2549	495	1074	980	CNOT4	TGA	TGAA	25.7559	3.47145	22.1725	0.111982	230	31	198	1	10.1043	7.01303	20.6448	0.114268	0.0162936	36	26	0	30	0	0
ENST00000622082.4	chr11	218	1	1324	1230	-4	98	NUCB2	TAA	TAAA	184.099	89.1379	94.737	0.223964	1644	796	846	2	139.047	72.4698	-23684.2	2.28535	0.0315352	63	3	0.223964	57	3.9292	0.0542185
ENST00000035307.6	chr7	794	1	3933	2286	1507	140	CHPF2	TAG	TAGC	28.1075	19.037	9.07056	0	251	170	81	0	7.14659	8.32764	6.01895	0	0	18	1	0	12	0	0
ENST00000528450.5	chr11	417	-1	2313	1647	112	554	SLC43A1	TAG	TAGA	10.7503	10.7503	0	0	96	96	0	0	4.64777	6.5272	0	0	0	27	7	0	21	0	0
ENST00000439220.6	chr15	356	1	1855	1320	172	363	CSK	TGA	TGAC	38.074	33.7067	3.8074	0.559911	340	301	34	5	20.525	25.5353	22.136	1.54246	0.0604047	90	1	0.447929	84	5.33249	0.208828
ENST00000354700.10	chr1	21	-1	3748	2472	109	1167	ACAP3	TAG	TAGG	5.82308	5.82308	0	0	52	52	0	0	1.55365	2.35561	0	0	0	393	7	0	387	0	0
ENST00000649662.1	chr17	486	1	1903	1650	24	229	CDC6	TAA	TAAA	149.72	149.048	0.335947	0.335947	1337	1331	3	3	78.6759	90.3323	13.9978	1.46702	0.0162402	45	5	0.111982	39	2.87134	0.0317864
ENST00000628593.1	chr5	160	1	1261	783	288	190	SETD9	TGA	TGAC	1.9037	1.79172	0.111982	0	17	16	1	0	1.50967	2.28827	0.388827	0	0	93	5	0	87	0	0
ENST00000506197.2	chr4	131	1	890	171	104	615	SMIM20	TGA	TGAG	6.60695	4.59127	0.223964	1.79172	59	41	2	16	7.42354	26.8495	2.1535	2.91336	0.108507	21	15	0	15	0	0
ENST00000417237.5	chr3	199	1	1799	1458	239	102	TCAIM	TAA	TAAC	18.701	11.0862	7.50281	0.111982	167	99	67	1	10.3952	7.60373	31.3925	1.09787	0.144385	33	3	0	27	0	0
ENST00000421017.6	chr15	240	-1	1399	987	130	282	ANXA2	TGA	TGAA	74.3562	73.1244	1.00784	0.223964	664	653	9	2	53.1495	74.0875	7.75262	0.7942	0.0107198	81	7	0.223964	75	2.98619	0.0403063
ENST00000359326.9	chr1	1399	1	3966	2529	350	1087	C1orf112	TGA	TGAA	77.7157	74.0203	3.69541	0	694	661	33	0	19.5955	29.2686	10.5583	0	0	126	15	0	120	0	0
ENST00000005340.10	chr17	126	-1	2944	2178	249	517	DVL2	TAG	TAGC	48.2643	46.9206	1.34379	0	431	419	12	0	16.3941	21.543	5.39673	0	0	219	4	0	213	0	0
ENST00000329082.11	chr15	496	-1	11305	1320	266	9719	RGMA	TAG	TAGA	4.14334	4.14334	0	0	37	37	0	0	0.366505	3.1389	0	0	0	189	95	0	183	0	0
ENST00000242209.9	chr7	168	1	3379	1680	128	1571	FKBP9	TAA	TAAA	13.2139	12.878	0.335947	0	118	115	3	0	3.9106	7.66545	2.62458	0	0	105	32	0	99	0	0
ENST00000356489.9	chr6	569	1	1469	1146	41	282	BCKDHB	TGA	TGAC	33.4827	33.3707	0	0.111982	299	298	0	1	22.7928	29.1193	0	0.3971	0.013637	27	7	0	21	0	0
ENST00000300209.13	chr12	537	1	2642	648	105	1889	EEF1AKMT3	TGA	TGAC	2.57559	2.46361	0	0.111982	23	22	0	1	0.974864	3.80187	0	0.0592812	0.0155927	87	27	0	81	0	0
ENST00000325974.8	chr7	45	1	1757	1416	60	281	CCZ1	TGA	TGAC	46.1367	46.0247	0.111982	0	412	411	1	0	26.2588	32.5033	1.86637	0	0	30	9	0	24	0	0
ENST00000614239.1	chr17	425	1	3380	1188	717	1475	LHX1	TAG	TAGC	1.9037	1.9037	0	0	17	17	0	0	0.563224	1.60244	0	0	0	45	23	0	39	0	0
ENST00000381527.8	chr13	39	1	3020	1362	507	1151	CDK8	TGA	TGAG	24.4121	20.2688	3.91938	0.223964	218	181	35	2	8.08349	14.8816	7.73053	0.194583	0.0130753	87	27	0	81	0	0
ENST00000290705.12	chr16	481	1	351	153	67	131	MT1A	TGA	TGAT	2.23964	2.23964	0	0	20	20	0	0	6.38075	14.6382	0	0	0	132	1	0	126	0	0
ENST00000242776.8	chr19	386	-1	1426	1251	96	79	DDX39A	TAA	TAAC	218.253	210.975	6.9429	0.335947	1949	1884	62	3	153.053	168.645	72.3219	4.25249	0.0252157	84	1	0.335947	78	4.30701	0.025539
ENST00000393143.5	chr14	450	-1	3604	429	35	3140	PRIMA1	TGA	TGAG	0.671893	0.447929	0.111982	0.111982	6	4	1	1	0.18643	1.04412	3.19949	0.0356631	0.0341561	123	39	0	117	0	0
ENST00000379068.7	chrX	111	1	5441	4374	37	1030	POLA1	TAA	TAAG	170.213	169.877	0.111982	0.223964	1520	1517	1	2	31.2834	38.8379	3.02655	0.217441	0.00559868	36	19	0	30	0	0
ENST00000535642.5	chr10	156	-1	1859	1344	165	350	ZNF239	TAA	TAAC	10.7503	9.07056	1.67973	0	96	81	15	0	5.78284	6.74893	10.1802	0	0	102	5	0	96	0	0
ENST00000599538.5	chr19	1033	-1	2081	1392	659	30	VRK3	TAG	TAGG	40.4256	35.0504	5.37515	0	361	313	48	0	19.426	25.1799	8.15652	0	0	30	0	0	24	0	0
ENST00000356260.10	chr4	313	-1	2958	2031	98	829	SDAD1	TAA	TAAC	65.5096	63.046	2.46361	0	585	563	22	0	22.1466	31.0419	25.1389	0	0	66	19	0	60	0	0
ENST00000316981.8	chr8	265	-1	7266	1470	468	5328	PLAG1	TAG	TAGG	8.06272	6.15902	1.9037	0	72	55	17	0	1.10965	4.18981	4.06773	0	0	51	110	0	45	0	0
ENST00000377990.7	chr2	293	1	5758	2241	153	3364	CEP68	TAA	TAAC	17.9172	16.4614	1.45577	0	160	147	13	0	3.1117	7.34556	9.51483	0	0	51	71	0	45	0	0
ENST00000225972.8	chr17	733	-1	2835	891	200	1744	LRRC59	TGA	TGAG	250.728	236.507	13.1019	1.11982	2239	2112	117	10	88.4403	265.439	65.5096	0.6421	0.00241901	132	34	0.335947	126	2.66624	0.0100446
ENST00000262764.11	chr17	979	1	2252	1638	11	603	PGS1	TGA	TGAG	20.0448	19.9328	0	0.111982	179	178	0	1	8.9009	12.169	0	0.185709	0.0152608	150	5	0.111982	144	0.777655	0.0639045
ENST00000240488.7	chr4	578	1	923	585	83	255	MND1	TAA	TAAA	37.85	37.5141	0.111982	0.223964	338	335	1	2	41.0076	64.1266	1.34918	0.878292	0.0136962	18	4	0	12	0	0
ENST00000546966.5	chr12	611	-1	709	549	56	104	CSRP2	TAA	TAAG	114.11	111.534	2.12766	0.447929	1019	996	19	4	160.945	203.159	37.994	4.30701	0.0212002	33	4	0	27	0	0
ENST00000280057.6	chr13	162	1	2059	1716	125	218	FAM124A	TGA	TGAA	2.01568	2.01568	0	0	18	18	0	0	0.978961	1.17464	0	0	0	218	0	0	212	0	0
ENST00000322776.10	chr11	691	1	1551	1362	147	42	NDUFV1	TAG	TAGC	159.575	139.866	19.7089	0	1425	1249	176	0	102.885	102.692	134.074	0	0	42	0	0	36	0	0
ENST00000319357.6	chr7	197	1	3873	1212	130	2531	STK17A	TGA	TGAG	29.1154	27.8836	1.00784	0.223964	260	249	9	2	7.51753	23.0063	7.75262	0.0884885	0.00384628	39	50	0	33	0	0
ENST00000369713.10	chr10	544	1	768	693	31	44	GSTO1	TGA	TGAA	156.663	154.871	1.45577	0.335947	1399	1383	13	3	203.988	223.48	46.9603	7.63515	0.0341649	44	0	0.223964	38	5.8938	0.0263729
ENST00000380668.9	chrX	42	1	2466	924	122	1420	PRPS2	TAA	TAAA	118.477	116.126	1.9037	0.447929	1058	1037	17	4	48.0443	125.677	15.6041	0.315443	0.00250995	36	28	0	30	0	0
ENST00000367478.9	chr1	1499	-1	9591	7059	219	2313	TPR	TAA	TAAA	485.443	480.516	4.59127	0.335947	4335	4291	41	3	50.6144	68.0714	20.9647	0.145243	0.00213368	18	60	0.223964	12	18.6637	0.274179
ENST00000375078.4	chr1	245	-1	2281	204	825	1252	CAMK2N1	TAA	TAAC	2.79956	0.895858	1.9037	0	25	8	17	0	1.22734	4.39146	2.30751	0	0	18	19	0	12	0	0
ENST00000378026.5	chr12	720	-1	3076	1776	163	1137	CKAP4	TAA	TAAA	123.068	121.053	1.11982	0.895858	1099	1081	10	8	40.0093	68.1604	6.87008	0.787914	0.0115597	30	22	0	24	0	0
ENST00000620048.6	chr1	1525	-1	8320	2295	319	5706	DENND1B	TAA	TAAA	7.16686	6.27101	0.783876	0.111982	64	56	7	1	0.861402	2.73246	2.45729	0.0196254	0.00718229	162	138	0	156	0	0
ENST00000604420.5	chr9	530	1	2985	2457	306	222	ODF2	TGA	TGAG	42.8892	40.4256	2.46361	0	383	361	22	0	14.3682	16.4532	8.05101	0	0	69	3	0	63	0	0
ENST00000585809.5	chr19	28	1	1563	1266	77	220	WDR18	TGA	TGAG	113.55	113.326	0.223964	0	1014	1012	2	0	72.6488	89.515	2.90863	0	0	36	4	0	30	0	0
ENST00000622254.1	chr14	231	1	2791	705	119	1967	MAPK1IP1L	TAA	TAAG	190.258	172.005	17.1333	1.11982	1699	1536	153	10	68.1683	243.978	143.977	0.569305	0.00233342	93	50	0.671893	87	7.72291	0.0316541
ENST00000256897.9	chr5	283	-1	1235	939	130	166	CCNH	TAA	TAAC	43.0012	40.5376	2.01568	0.447929	384	362	18	4	34.8188	43.171	15.5052	2.69837	0.0625042	45	3	0.111982	39	2.87134	0.0665108
ENST00000613122.4	chr18	238	1	5821	2853	141	2827	CTDP1	TGA	TGAG	24.3001	23.8522	0.447929	0	217	213	4	0	4.17457	8.3604	3.1768	0	0	24	29	0	18	0	0
ENST00000312629.10	chr11	681	1	1688	1416	46	226	RPS6KB2	TAG	TAGG	6.04704	5.37515	0.671893	0	54	48	6	0	3.58237	3.79601	14.6064	0	0	18	3	0	12	0	0
ENST00000616976.1	chr20	178	-1	1331	1170	20	141	NOL4L	TAG	TAGA	2.23964	2.12766	0.111982	0	20	19	1	0	1.68268	1.81852	5.59911	0	0	21	5	0	15	0	0
ENST00000542475.2	chr17	112	1	1711	324	190	1197	C17orf100	TGA	TGAG	0.783876	0.335947	0.335947	0.111982	7	3	3	1	0.458139	1.03687	1.76814	0.0935524	0.0902256	129	21	0	123	0	0
ENST00000381401.11_PAR_Y	chrY	7	-1	1406	864	98	444	SLC25A6	TAA	TAAG	147.481	145.017	2.23964	0.223964	1317	1295	20	2	104.894	167.844	22.8535	0.504425	0.00300532	132	3	0.223964	126	1.7775	0.0105902
ENST00000357275.6	chr20	306	1	991	453	74	464	DBNDD2	TAG	TAGC	6.27101	6.04704	0	0.223964	56	54	0	2	6.32796	13.3489	0	0.482682	0.036159	156	6	0.111982	150	0.746548	0.0559259
ENST00000038176.8	chr8	274	-1	3529	2721	216	592	NSMAF	TAA	TAAG	17.3572	17.2453	0.111982	0	155	154	1	0	4.91846	6.33784	0.518436	0	0	42	13	0	36	0	0
ENST00000620217.4	chr13	284	-1	1028	678	91	259	GRTP1	TGA	TGAC	3.91938	3.69541	0.223964	0	35	33	2	0	3.81263	5.45046	2.46115	0	0	33	8	0	27	0	0
ENST00000366777.4	chr1	1732	1	2821	1911	109	801	COQ8A	TAG	TAGG	100.336	98.9923	1.34379	0	896	884	12	0	35.5676	51.8013	12.3283	0	0	81	13	0	75	0	0
ENST00000358704.4	chr1	1818	1	3806	1563	143	2100	ZBTB18	TAA	TAAT	14.2217	13.3259	0	0.895858	127	119	0	8	3.73666	8.52584	0	0.426599	0.050036	45	54	0.111982	39	2.87134	0.336781
ENST00000367604.6	chr6	804	-1	9987	7308	1056	1623	HIVEP2	TGA	TGAT	17.4692	16.0135	1.45577	0	156	143	13	0	1.7492	2.19122	1.37857	0	0	150	29	0	144	0	0
ENST00000375050.6	chr6	270	-1	3184	1260	281	1643	PBX2	TGA	TGAT	21.2766	17.5812	3.47145	0.223964	190	157	31	2	6.68236	13.9533	12.3539	0.136314	0.0097693	567	14	0	561	0	0
ENST00000330143.7	chr8	553	1	2750	1092	403	1255	ZNF696	TGA	TGAG	6.9429	6.15902	0.671893	0.111982	62	55	6	1	2.52469	5.64013	1.66723	0.0892289	0.0158204	96	10	0	90	0	0
ENST00000361470.3	chrX	374	1	3585	2841	201	543	MAGEE1	TAG	TAGA	9.74246	9.18254	0.559911	0	87	82	5	0	2.71756	3.23215	2.78563	0	0	195	14	0	189	0	0
ENST00000392455.9	chr3	926	1	8584	1416	275	6893	CCDC50	TAA	TAAA	34.0426	31.1311	2.68757	0.223964	304	278	24	2	3.96582	21.9852	9.773	0.0324916	0.00147788	21	153	0.111982	15	7.46548	0.339568
ENST00000529196.5	chr11	1086	1	2357	2085	200	72	STT3A	TAA	TAAA	361.703	354.088	6.38299	1.2318	3230	3162	57	11	153.459	169.826	31.9149	17.1084	0.100741	57	1	1.2318	51	24.153	0.142222
ENST00000274811.9	chr5	704	-1	4077	1266	501	2310	RNF44	TGA	TGAG	13.1019	9.29453	3.35947	0.447929	117	83	30	4	3.21362	7.34165	6.70552	0.193909	0.0264121	165	26	0.111982	159	0.704291	0.0959309
ENST00000301281.11	chr19	137	-1	1870	1293	91	486	UBXN6	TGA	TGAA	18.925	17.2453	1.56775	0.111982	169	154	13	1	10.1203	13.3374	17.228	0.230416	0.0172759	264	3	0.111982	258	0.43404	0.032543
ENST00000322048.11	chr16	167	-1	1690	831	373	486	ROGDI	TGA	TGAT	3.69541	3.35947	0.335947	0	33	30	3	0	2.18664	4.04268	0.900662	0	0	387	5	0	381	0	0
ENST00000262995.8	chr4	541	1	7936	2142	421	5373	GAB1	TGA	TGAA	19.2609	17.3572	1.9037	0	172	155	17	0	2.42703	8.10329	4.52185	0	0	45	123	0	39	0	0
ENST00000274458.9	chr5	352	1	1390	576	22	792	COMMD10	TGA	TGAT	14.2217	13.7738	0.223964	0.223964	127	123	2	2	10.2315	23.9129	10.1802	0.282783	0.0118256	57	23	0.111982	51	2.19573	0.0918221
ENST00000382199.6	chr3	894	-1	3643	1767	90	1786	IGF2BP2	TGA	TGAG	48.2643	47.8164	0.111982	0.335947	431	427	1	3	13.2485	27.0608	1.24425	0.1881	0.00695102	33	23	0.111982	27	4.14749	0.153266
ENST00000376588.4	chr9	253	1	2161	1080	80	1001	PSAT1	TGA	TGAA	285.555	282.643	2.46361	0.447929	2550	2524	22	4	132.14	261.707	30.7951	0.447482	0.00170986	33	27	0.111982	27	4.14749	0.0158479
ENST00000607537.6	chr15	261	-1	2038	1395	404	239	CSNK1G1	TGA	TGAA	9.29453	6.27101	3.02352	0	83	56	27	0	4.56061	4.49534	7.48396	0	0	63	4	0	57	0	0
ENST00000369636.6	chr1	930	-1	741	567	44	130	RHOC	TGA	TGAG	41.6574	41.2095	0.335947	0.111982	372	368	3	1	56.2178	72.6798	7.63515	0.861402	0.011852	63	1	0.111982	57	1.9646	0.0270309
ENST00000281471.11	chr12	249	-1	1907	744	7	1156	AMN1	TGA	TGAT	5.93506	5.93506	0	0	53	53	0	0	3.11225	7.97723	0	0	0	27	30	0	21	0	0
ENST00000261349.9	chr12	156	-1	10207	4809	303	5095	LRP6	TGA	TGAG	38.074	37.2901	0.671893	0.111982	340	333	6	1	3.73018	7.75423	2.21747	0.0219789	0.00283443	21	102	0	15	0	0
ENST00000243563.8	chr19	760	1	1232	816	200	216	SNRPA	TAG	TAGC	167.525	151.288	16.0135	0.223964	1496	1351	143	2	135.978	185.402	80.0673	1.03687	0.00559257	192	1	0.111982	186	0.602055	0.0032473
ENST00000264255.8	chr2	493	-1	1463	648	121	694	TXNDC9	TAG	TAGA	61.5902	54.9833	5.59911	1.00784	550	491	50	9	42.0986	84.8507	46.2737	1.45222	0.017115	234	7	0.895858	228	3.9292	0.0463072
ENST00000369738.9	chr1	916	1	2248	543	25	1680	PIFO	TGA	TGAG	1.00784	1.00784	0	0	9	9	0	0	0.448328	1.85606	0	0	0	54	37	0	48	0	0
ENST00000335626.8	chr22	308	-1	6192	5784	129	279	TCF20	TGA	TGAG	55.2072	54.9833	0.223964	0	493	491	2	0	8.9159	9.5061	1.73616	0	0	21	6	0	15	0	0
ENST00000317907.9	chr2	172	1	2843	2499	237	107	TTC27	TGA	TGAT	84.6586	79.9553	4.70325	0	756	714	42	0	29.7779	31.9949	19.845	0	0	90	2	0	84	0	0
ENST00000217289.8	chr20	74	-1	5106	2001	783	2322	FERMT1	TGA	TGAA	2.12766	2.12766	0	0	19	19	0	0	0.416699	1.0633	0	0	0	222	34	0	216	0	0
ENST00000344726.9	chr6	564	-1	827	267	123	437	HMGN3	TGA	TGAA	98.6564	88.466	9.07056	1.11982	881	790	81	10	119.294	331.333	73.7444	2.56252	0.00773397	24	7	0.223964	18	12.4425	0.0375527
ENST00000334828.6	chr10	445	1	1757	732	111	914	PGAM1	TGA	TGAA	266.406	255.208	10.3024	0.895858	2379	2279	92	8	151.625	348.644	92.8141	0.980151	0.00281132	87	19	0.335947	81	4.14749	0.0118961
ENST00000360270.7	chrX	307	1	3915	1701	182	2032	MSN	TAA	TAAT	118.477	114.894	3.47145	0.111982	1058	1026	31	1	30.2624	67.5448	19.0739	0.0551094	0.000815893	18	34	0	12	0	0
ENST00000393708.3	chr19	276	-1	967	528	4	435	FDX2	TGA	TGAC	12.766	12.766	0	0	114	114	0	0	13.2016	24.178	0	0	0	51	10	0	45	0	0
ENST00000506970.2	chr4	86	-1	606	540	2	64	HMX1	TGA	TGAC	5.15118	5.15118	0	0	46	46	0	0	8.5003	9.53923	0	0	0	51	1	0	45	0	0
ENST00000355296.8	chr16	155	1	2546	1329	16	1201	DNAJA3	TAG	TAGG	86.1143	85.4425	0	0.671893	769	763	0	6	33.8234	64.2908	0	0.559445	0.00870179	72	18	0.111982	66	1.6967	0.026391
ENST00000249883.9	chr3	672	-1	4443	2310	308	1825	AMOTL2	TGA	TGAA	11.8701	11.3102	0.559911	0	106	101	5	0	2.67164	4.89619	1.81789	0	0	129	24	0	123	0	0
ENST00000612133.4	chr17	617	-1	4893	1626	829	2438	MPP2	TGA	TGAG	25.8679	25.42	0.335947	0.111982	231	227	3	1	5.28672	15.6334	0.405243	0.045932	0.00293806	36	24	0	30	0	0
ENST00000215957.10	chr22	235	1	4665	2559	120	1986	MICALL1	TAA	TAAC	26.7638	26.0919	0.111982	0.559911	239	233	1	5	5.73714	10.1961	0.933185	0.281929	0.0276506	108	19	0.223964	102	2.19573	0.21535
ENST00000562103.2	chr16	83	-1	3321	2682	68	571	ZNF598	TAG	TAGC	49.8321	49.6081	0	0.223964	445	443	0	2	15.0051	18.4967	0	0.392232	0.0212055	303	4	0.223964	297	0.754089	0.0407689
ENST00000331662.3	chr4	33	1	5526	372	198	4956	NAT8L	TGA	TGAC	13.2139	8.8466	3.58343	0.783876	118	79	32	7	2.39122	23.7812	18.0981	0.158167	0.00665093	213	44	0	207	0	0
ENST00000585916.6	chr18	139	-1	11198	1833	156	9209	PIAS2	TAA	TAAA	18.3651	17.9172	0.447929	0	164	160	4	0	1.64003	9.77477	2.87134	0	0	60	187	0	54	0	0
ENST00000341550.9	chr12	58	-1	1614	714	12	888	ING4	TAG	TAGA	12.0941	11.8701	0.111982	0.111982	108	106	1	1	7.49324	16.6248	9.33185	0.126106	0.00758542	54	10	0	48	0	0
ENST00000410069.1	chr7	116	1	845	390	339	116	CCDC126	TAG	TAGC	6.27101	4.70325	1.00784	0.559911	56	42	9	5	7.42131	12.0596	2.97298	4.82682	0.400246	116	0	0.559911	110	5.0901	0.422078
ENST00000307921.7	chr16	663	-1	1824	1476	140	208	ADAT1	TGA	TGAG	11.0862	8.1747	2.79956	0.111982	99	73	25	1	6.07798	5.53842	19.9968	0.538376	0.0972076	72	3	0.111982	66	1.6967	0.306351
ENST00000310227.3	chr20	119	1	2801	1500	158	1143	INSM1	TAG	TAGA	1.79172	1.79172	0	0	16	16	0	0	0.63967	1.19448	0	0	0	159	19	0	153	0	0
ENST00000368321.8	chr1	1216	-1	2916	1812	34	1070	KHDC4	TAG	TAGG	39.1938	39.1938	0	0	350	350	0	0	13.4409	21.6301	0	0	0	33	22	0	27	0	0
ENST00000269601.10	chr18	241	-1	3427	396	165	2866	TXNL4A	TGA	TGAG	38.6339	31.467	6.71893	0.447929	345	281	60	4	11.2734	79.4622	40.7208	0.156291	0.00196686	24	31	0	18	0	0
ENST00000383791.8	chr3	80	-1	3234	1335	172	1727	SH3BP5	TGA	TGAT	21.3886	19.9328	1.2318	0.223964	191	178	11	2	6.61367	14.931	7.16166	0.129684	0.00868558	78	35	0	72	0	0
ENST00000256413.8	chr18	147	1	5720	1764	304	3652	CTIF	TGA	TGAC	11.4222	10.0784	1.34379	0	102	90	12	0	1.99689	5.71338	4.42035	0	0	171	28	0	165	0	0
ENST00000215061.9	chr19	445	1	1066	762	16	288	OCEL1	TAA	TAAG	3.02352	3.02352	0	0	27	27	0	0	2.83632	3.96787	0	0	0	201	4	0	195	0	0
ENST00000431350.7	chr2	755	-1	5678	2268	459	2951	TLK1	TGA	TGAC	23.2923	21.5006	1.67973	0.111982	208	192	15	1	4.1022	9.47998	3.65955	0.0379472	0.00400288	141	77	0.111982	135	0.829498	0.0875
ENST00000216181.10	chr22	202	-1	7509	5850	274	1385	MYH9	TAA	TAAG	448.825	443.002	5.48713	0.335947	4008	3956	49	3	59.7716	75.7268	20.026	0.242561	0.0032031	21	18	0	15	0	0
ENST00000393066.7	chr17	789	-1	3577	2862	454	261	TRIM37	TAA	TAAT	44.345	40.5376	3.8074	0	396	362	34	0	12.3973	14.1641	8.38634	0	0	36	9	0	30	0	0
ENST00000537471.5	chr14	164	1	5909	1296	332	4281	MIPOL1	TGA	TGAT	15.4536	13.3259	2.01568	0.111982	138	119	18	1	2.61526	10.2823	6.07133	0.026158	0.00254397	105	104	0	99	0	0
ENST00000418115.6	chr3	289	-1	1760	549	153	1058	RHOA	TGA	TGAA	461.815	366.406	89.1379	6.27101	4124	3272	795	56	262.395	667.406	582.6	5.92723	0.00888099	162	15	5.82308	156	37.3274	0.0559291
ENST00000409900.8	chr2	778	-1	2607	1347	463	797	CHN1	TAA	TAAA	8.06272	5.71109	2.35163	0	72	51	21	0	3.09272	4.23986	5.07911	0	0	39	17	0	33	0	0
ENST00000414716.8	chr14	536	1	6682	4632	267	1783	CEP170B	TAG	TAGG	12.542	12.43	0.111982	0	112	111	1	0	1.87698	2.68351	0.419409	0	0	378	12	0	372	0	0
ENST00000426004.5	chr20	304	1	2870	198	174	2498	SYS1	TGA	TGAC	7.27885	4.14334	2.91154	0.223964	65	37	26	2	2.53618	20.926	16.733	0.0896575	0.00428451	78	46	0	72	0	0
ENST00000382592.5	chr13	14	-1	5501	3234	439	1828	LATS2	TAG	TAGA	5.82308	4.81524	1.00784	0	52	43	9	0	1.05855	1.48894	2.29576	0	0	102	27	0	96	0	0
ENST00000279394.7	chr16	354	1	4201	3117	397	687	TAOK2	TGA	TGAG	34.0426	21.8365	12.0941	0.111982	304	195	108	1	8.10345	7.00563	30.4637	0.163002	0.0232673	24	9	0	18	0	0
ENST00000341255.4	chr22	331	-1	5374	687	439	4248	RTL6	TAA	TAAG	23.7402	19.3729	3.91938	0.447929	212	173	35	4	4.41761	28.1993	8.92797	0.105445	0.00373926	21	51	0	15	0	0
ENST00000283131.4	chr4	542	1	7639	3126	217	4296	SMARCA5	TGA	TGAA	427.884	418.59	8.06272	1.2318	3821	3738	72	11	56.0131	133.906	37.1554	0.286733	0.0021413	48	84	0.895858	42	21.33	0.159291
ENST00000374234.1	chr9	406	-1	668	135	180	353	INIP	TAA	TAAT	12.654	8.8466	3.69541	0.111982	113	79	33	1	18.9431	65.5304	20.5301	0.31723	0.00484097	39	9	0	33	0	0
ENST00000369705.4	chr6	577	-1	3293	1686	91	1516	ME1	TAG	TAGG	52.6317	52.1837	0.335947	0.111982	470	466	3	1	15.9829	30.9512	3.69172	0.0738669	0.00238656	21	41	0	15	0	0
ENST00000372759.4	chr1	505	1	2930	1395	30	1505	ZMPSTE24	TGA	TGAG	224.748	223.181	0.111982	1.45577	2007	1993	1	13	76.7059	159.986	3.73274	0.967289	0.00604608	18	42	0	12	0	0
ENST00000377818.4	chr13	189	-1	2186	216	21	1949	MZT1	TGA	TGAC	80.2913	71.7806	0.111982	8.39867	717	641	1	75	36.7298	332.318	5.33249	4.30922	0.0129672	51	49	1.56775	45	34.8389	0.104836
ENST00000467728.5	chr11	353	1	2686	1311	1232	143	NR1H3	TGA	TGAC	5.37515	5.26317	0.111982	0	48	47	1	0	2.00117	4.01462	0.0908947	0	0	81	1	0	75	0	0
ENST00000620195.4	chr16	744	1	10986	2157	326	8503	ZNF778	TAA	TAAT	8.51065	6.60695	1.9037	0	76	59	17	0	0.774681	3.06303	5.83957	0	0	45	130	0	39	0	0
ENST00000346177.6	chr7	627	1	8997	8046	206	745	FLNC	TGA	TGAA	40.6496	40.3136	0.223964	0.111982	363	360	2	1	4.51812	5.01039	1.08721	0.150312	0.03	141	5	0	135	0	0
ENST00000422285.6	chrX	87	1	3265	1140	99	2026	PDHA1	TAA	TAAG	300.672	294.737	5.37515	0.559911	2685	2632	48	5	92.0895	258.541	54.2944	0.276363	0.00106893	63	31	0.111982	57	1.9646	0.00759878
ENST00000372940.3	chr10	300	-1	821	267	205	349	MRPS16	TAA	TAAA	81.6351	60.6944	20.4928	0.447929	729	542	182	4	99.4337	227.32	99.9646	1.28346	0.00564607	48	5	0	42	0	0
ENST00000312251.8	chr16	172	-1	2158	1515	15	628	NAGPA	TGA	TGAA	10.1904	10.1904	0	0	91	91	0	0	4.72214	6.72633	0	0	0	135	9	0	129	0	0
ENST00000553612.6	chr14	407	-1	6298	1098	435	4765	GTF2A1	TGA	TGAA	69.7649	59.4626	9.85444	0.447929	623	531	88	4	11.0773	54.1553	22.6539	0.094004	0.00173582	24	120	0	18	0	0
ENST00000286428.6	chrX	768	1	1547	561	17	969	VBP1	TAA	TAAT	265.062	264.39	0.111982	0.559911	2367	2361	1	5	171.339	471.284	6.58719	0.577824	0.00122606	48	26	0.335947	42	7.99873	0.0169722
ENST00000271628.9	chr1	1045	-1	1499	1242	38	219	SF3B4	TAA	TAAA	187.122	185.779	0.783876	0.559911	1671	1659	7	5	124.831	149.58	20.6283	2.55667	0.0170923	75	4	0.559911	69	8.11466	0.0542495
ENST00000506351.6	chr5	215	1	2983	2640	71	272	TNPO1	TAA	TAAT	338.746	336.507	1.79172	0.447929	3025	3005	16	4	113.559	127.465	25.2354	1.6468	0.0129196	33	3	0.111982	27	4.14749	0.0325384
ENST00000418109.5	chr3	282	-1	5629	5364	159	106	LAMB2	TGA	TGAC	32.4749	32.1389	0.335947	0	290	287	3	0	5.7692	5.99159	2.11287	0	0	30	2	0	24	0	0
ENST00000425792.5	chr3	101	1	1203	573	245	385	UBE2E2	TAG	TAGG	21.9485	21.0527	0.895858	0	196	188	8	0	18.2448	36.7411	3.65656	0	0	129	2	0	123	0	0
ENST00000614556.5	chr17	824	1	6279	996	195	5088	DCAF7	TAG	TAGT	113.326	108.847	3.58343	0.895858	1012	972	32	8	18.0484	109.284	18.3766	0.176073	0.00161115	69	81	0	63	0	0
ENST00000377041.6	chr9	231	-1	1267	849	295	123	ABHD17B	TGA	TGAT	29.2274	26.2038	3.02352	0	261	234	27	0	23.0682	30.8644	10.2492	0	0	69	2	0	63	0	0
ENST00000261018.11	chr2	902	1	6593	1509	270	4814	ABI2	TAA	TAAA	21.5006	19.3729	1.9037	0.223964	192	173	17	2	3.26112	12.8383	7.05073	0.0465236	0.00362382	84	103	0	78	0	0
ENST00000544455.5	chr13	73	1	10939	10224	221	494	BRCA2	TAA	TAAG	64.6138	64.2778	0.335947	0	577	574	3	0	5.90673	6.28695	1.52012	0	0	30	9	0	24	0	0
ENST00000352410.9	chr15	361	1	5748	1239	26	4483	MPI	TAA	TAAA	97.6485	96.8646	0.447929	0.335947	872	865	4	3	16.9883	78.1797	17.228	0.0749379	0.000958534	105	50	0.223964	99	2.26227	0.0289368
ENST00000265388.9	chr7	632	-1	4108	2739	138	1231	TNPO3	TAG	TAGC	129.899	123.852	5.71109	0.335947	1160	1106	51	3	31.6211	45.2181	41.3847	0.272906	0.00603532	204	14	0.335947	198	1.6967	0.0375226
ENST00000449844.6	chr19	923	1	1998	1740	156	102	NPAS1	TGA	TGAG	3.47145	3.35947	0.111982	0	31	30	1	0	1.73746	1.93073	0.717835	0	0	90	1	0	84	0	0
ENST00000263974.4	chr1	376	-1	1314	453	429	432	TAF12	TAA	TAAC	15.4536	12.318	2.79956	0.335947	138	110	25	3	11.7607	27.1922	6.52577	0.777655	0.0285985	54	7	0.111982	48	2.33296	0.0857955
ENST00000356080.8	chr10	551	1	3036	2088	361	587	ADD3	TAA	TAAA	69.205	66.5175	2.57559	0.111982	618	594	23	1	22.7948	31.857	7.1346	0.19077	0.00598833	51	15	0.111982	45	2.48849	0.0781145
ENST00000216218.8	chr22	276	-1	3167	1077	93	1997	ST13	TAA	TAAT	169.093	161.254	7.50281	0.335947	1510	1440	67	3	53.3922	149.726	80.6754	0.168226	0.00112356	18	42	0	12	0	0
ENST00000335420.10	chr7	641	1	6353	1296	104	4953	KLHDC10	TGA	TGAG	32.1389	30.6831	0.783876	0.671893	287	274	7	6	5.05885	23.6753	7.53727	0.135654	0.00572977	42	95	0.335947	36	9.33185	0.394161
ENST00000272139.5	chr1	1741	-1	1245	759	92	394	C1orf35	TGA	TGAT	27.0997	26.2038	0.671893	0.223964	242	234	6	2	21.7668	34.5242	7.30319	0.568438	0.0164649	153	4	0.223964	147	1.52357	0.0441305
ENST00000469959.1	chr3	669	-1	455	183	161	111	RAB6B	TAA	TAAG	1.00784	0.335947	0.671893	0	9	3	6	0	2.21503	1.83577	4.17325	0	0	39	2	0	33	0	0
ENST00000521022.6	chr8	158	-1	2504	1944	81	479	INTS9	TGA	TGAG	34.4905	33.5947	0.895858	0	308	300	8	0	13.7742	17.2812	11.06	0	0	120	4	0	114	0	0
ENST00000369908.9	chr20	467	-1	1909	1569	294	46	UCKL1	TAG	TAGC	24.8601	24.8601	0	0	222	222	0	0	13.0226	15.8445	0	0	0	48	1	0	42	0	0
ENST00000007264.7	chr16	37	-1	2003	906	127	970	RPUSD1	TGA	TGAG	9.51849	8.51065	0.671893	0.335947	85	76	6	3	4.75212	9.39365	5.2905	0.346337	0.0368692	198	4	0.223964	192	1.16648	0.124178
ENST00000377069.8	chr12	857	-1	5179	3765	401	1013	KDM2B	TGA	TGAG	32.1389	31.1311	1.00784	0	287	278	9	0	6.20562	8.26854	2.51332	0	0	27	17	0	21	0	0
ENST00000361060.5	chr2	313	-1	8587	2013	171	6403	GFPT1	TGA	TGAG	93.0572	91.1536	1.56775	0.335947	831	814	14	3	10.837	45.2824	9.16814	0.0524671	0.00115866	78	142	0.111982	72	1.55531	0.0343468
ENST00000262519.14	chr16	395	1	5946	5091	220	635	SETD1A	TGA	TGAG	48.0404	43.897	3.91938	0.223964	429	392	35	2	8.07945	8.62248	17.8154	0.3527	0.0409047	246	5	0.111982	240	0.466593	0.0541135
ENST00000559916.1	chr15	152	1	1036	327	28	681	B2M	TAA	TAAG	248.937	244.233	4.36731	0.335947	2222	2180	39	3	240.286	746.891	155.975	0.493314	0.00066049	18	12	0.335947	12	27.9956	0.0374828
ENST00000222008.11	chr19	791	-1	705	525	23	157	RABAC1	TGA	TGAG	110.638	109.967	0.223964	0.447929	988	982	2	4	156.934	209.46	9.73759	2.85305	0.013621	157	0	0.447929	151	2.96642	0.0141622
ENST00000503292.5	chr4	99	1	5130	4830	174	126	CC2D2A	TAA	TAAT	11.6462	11.6462	0	0	104	104	0	0	2.27021	2.41121	0	0	0	51	1	0	45	0	0
ENST00000270722.10	chr1	64	1	8653	3798	51	4804	PRDM16	TGA	TGAC	7.16686	6.71893	0.335947	0.111982	64	60	3	1	0.828252	1.76907	6.58719	0.0233102	0.0131765	315	52	0	309	0	0
ENST00000336216.9	chr15	389	1	3760	1011	115	2634	HMG20A	TAG	TAGG	42.3293	39.9777	2.01568	0.335947	378	357	18	3	11.2578	39.5427	17.5277	0.127542	0.00322544	33	34	0	27	0	0
ENST00000267970.8	chr15	387	-1	6422	729	268	5425	TSPAN3	TAG	TAGT	142.329	131.243	6.27101	4.81524	1271	1172	56	43	22.1628	180.032	23.3993	0.887601	0.00493025	18	79	0.111982	12	9.33185	0.0518345
ENST00000373791.7	chr1	384	-1	2371	861	367	1143	MECR	TGA	TGAT	18.5891	14.8936	3.69541	0	166	133	33	0	7.84017	17.2981	10.0692	0	0	135	15	0	129	0	0
ENST00000348411.3	chrX	196	1	1854	957	279	618	FTSJ1	TAA	TAAC	46.2487	38.1859	7.72678	0.335947	413	341	69	3	24.9453	39.9017	27.6945	0.543603	0.0136236	21	12	0.223964	15	14.931	0.374194
ENST00000367835.1	chr1	1385	-1	2355	1557	551	247	GPR161	TGA	TGAG	3.24749	3.24749	0	0	29	29	0	0	1.37897	2.08573	0	0	0	210	2	0	204	0	0
ENST00000287020.7	chr8	398	-1	3667	1335	108	2224	GDF6	TAG	TAGC	2.01568	2.01568	0	0	18	18	0	0	0.549681	1.50987	0	0	0	426	36	0	420	0	0
ENST00000335154.10	chr12	332	-1	12580	3051	219	9310	FMNL3	TGA	TGAG	7.16686	6.83092	0.223964	0.111982	64	61	2	1	0.569703	2.23891	1.02267	0.0120282	0.00537233	165	108	0	159	0	0
ENST00000652536.1	chr6	640	-1	7205	2100	187	4918	PREP	TAA	TAAA	130.571	126.316	4.03136	0.223964	1166	1128	36	2	18.1223	60.1505	21.5581	0.0455398	0.000757097	129	89	0.111982	123	0.910425	0.0151358
ENST00000357749.7	chrX	400	-1	5393	1929	20	3444	CHM	TAA	TAAT	34.2666	34.1546	0	0.111982	306	305	0	1	6.3539	17.7059	0	0.0325152	0.00183641	42	76	0	36	0	0
ENST00000570010.6	chr16	653	1	3242	1191	157	1894	ZFP1	TGA	TGAA	20.1568	19.3729	0.671893	0.111982	180	173	6	1	6.2174	16.2661	4.27958	0.0591247	0.00363484	147	34	0	141	0	0
ENST00000296137.7	chr3	223	-1	8469	4404	209	3856	FYCO1	TAG	TAGC	16.1254	15.0056	1.11982	0	144	134	10	0	1.90406	3.40727	5.358	0	0	78	53	0	72	0	0
ENST00000595329.5	chr19	709	-1	1254	804	126	324	FBXO17	TAG	TAGC	12.878	12.766	0.111982	0	115	114	1	0	10.2695	15.8781	0.888748	0	0	249	1	0	243	0	0
ENST00000400075.3	chr21	29	1	4769	1332	215	3222	GABPA	TGA	TGAG	53.4155	48.7123	4.47929	0.223964	477	435	40	2	11.2006	36.5708	20.8339	0.069511	0.00190073	57	72	0	51	0	0
ENST00000392062.7	chr2	1034	1	5016	915	419	3682	RHBDD1	TGA	TGAG	16.1254	13.4379	2.57559	0.111982	144	120	23	1	3.2148	14.6862	6.147	0.0304134	0.00207089	36	49	0	30	0	0
ENST00000303731.8	chr17	172	-1	766	405	110	251	TRAPPC1	TGA	TGAA	86.6743	84.3226	2.35163	0	774	753	21	0	113.152	208.204	21.3784	0	0	123	2	0	117	0	0
ENST00000243077.7	chr12	510	1	14852	13602	460	790	LRP1	TAG	TAGG	39.0818	38.074	1.00784	0	349	340	9	0	2.63142	2.79914	2.19096	0	0	396	3	0	390	0	0
ENST00000374782.7	chr17	1006	-1	3460	3102	188	170	CEP131	TGA	TGAC	18.4771	18.0291	0.447929	0	165	161	4	0	5.34019	5.8121	2.3826	0	0	170	0	0	164	0	0
ENST00000345254.9	chr10	309	1	4400	3252	88	1060	SEC24C	TAA	TAAA	98.5444	96.6407	1.9037	0	880	863	17	0	22.3964	29.7173	21.6329	0	0	78	9	0	72	0	0
ENST00000313511.8	chr16	329	-1	1966	1335	73	558	TUFM	TGA	TGAG	419.597	416.126	3.1355	0.335947	3747	3716	28	3	213.427	311.705	42.9521	0.602055	0.00193149	36	8	0.335947	30	11.1982	0.0359257
ENST00000290354.6	chr21	112	1	953	801	108	44	CBR3	TAA	TAAA	5.93506	5.82308	0.111982	0	53	52	1	0	6.22776	7.26976	1.03687	0	0	27	3	0	21	0	0
ENST00000292140.9	chr19	823	-1	2546	1890	355	301	PHLDB3	TGA	TGAG	7.27885	7.27885	0	0	65	65	0	0	2.85893	3.85124	0	0	0	69	3	0	63	0	0
ENST00000279034.10	chr20	236	-1	3658	3018	321	319	SOGA1	TGA	TGAA	6.04704	5.93506	0.111982	0	54	53	1	0	1.6531	1.96655	0.348854	0	0	33	3	0	27	0	0
ENST00000396213.7	chr11	235	1	1671	966	258	447	LDHAL6A	TAA	TAAA	1.79172	1.79172	0	0	16	16	0	0	1.07224	1.85478	0	0	0	24	11	0	18	0	0
ENST00000263956.8	chr2	855	-1	4216	2628	66	1522	GTF3C3	TAA	TAAA	114.782	113.662	0.783876	0.335947	1025	1015	7	3	27.2253	43.2504	11.8769	0.220727	0.00510347	42	35	0.223964	36	6.22124	0.143842
ENST00000567147.5	chr16	98	-1	785	741	9	35	RNPS1	TAG	TAGC	110.638	110.414	0.223964	0	988	986	2	0	140.941	149.007	24.8849	0	0	18	1	0	12	0	0
ENST00000534061.6	chr11	841	1	3421	2190	90	1141	NAALAD2	TAG	TAGA	7.61479	7.27885	0.335947	0	68	65	3	0	2.2259	3.32367	3.73274	0	0	18	24	0	12	0	0
ENST00000368926.5	chr1	1075	1	2051	993	102	956	C1orf56	TAA	TAAT	4.70325	4.59127	0.111982	0	42	41	1	0	2.29315	4.62364	1.09787	0	0	63	13	0	57	0	0
ENST00000280772.7	chr10	226	-1	16974	13101	331	3542	ANK3	TAA	TAAC	28.6675	28.6675	0	0	256	256	0	0	1.6889	2.18819	0	0	0	27	78	0	21	0	0
ENST00000314754.12	chr1	1633	1	2175	1290	59	826	CD55	TAG	TAGA	52.1837	52.0717	0.111982	0	466	465	1	0	23.9925	40.3657	1.898	0	0	21	14	0	15	0	0
ENST00000263847.6	chr11	454	-1	4668	2391	104	2173	OSBP	TGA	TGAA	89.0259	87.7941	0.895858	0.335947	795	784	8	3	19.0715	36.7186	8.61402	0.1546	0.00421042	75	23	0	69	0	0
ENST00000238738.9	chr2	230	1	4735	585	551	3599	RHOQ	TGA	TGAG	2.12766	1.56775	0.559911	0	19	14	5	0	0.449348	2.67992	1.01617	0	0	84	66	0	78	0	0
ENST00000350498.8	chr7	429	-1	2559	513	43	2003	PDAP1	TAA	TAAC	64.3898	64.1658	0.111982	0.111982	575	573	1	1	25.1621	125.08	2.60424	0.0559073	0.000446974	207	28	0	201	0	0
ENST00000396394.6	chr11	208	-1	1460	759	391	310	PSMA1	TAA	TAAG	409.967	391.602	17.2453	1.11982	3661	3497	154	10	280.799	515.945	44.1055	3.61233	0.00700139	39	6	0.335947	33	10.1802	0.0197312
ENST00000402686.7	chr9	576	1	2993	2145	154	694	POMT1	TAG	TAGA	34.6025	34.2666	0.223964	0.111982	309	306	2	1	11.5611	15.9751	1.45431	0.161358	0.0101006	72	15	0.111982	66	1.6967	0.106209
ENST00000392161.3	chr19	654	-1	2578	1566	237	775	ZFP82	TAA	TAAG	1.9037	1.9037	0	0	17	17	0	0	0.73844	1.21564	0	0	0	108	15	0	102	0	0
ENST00000421755.5	chr7	451	1	1527	1329	45	153	AP4M1	TGA	TGAG	9.29453	9.07056	0.223964	0	83	81	2	0	6.08679	6.8251	4.97699	0	0	120	2	0	114	0	0
ENST00000335012.3	chr3	888	-1	7114	720	231	6163	C3orf70	TGA	TGAG	1.56775	1.45577	0.111982	0	14	13	1	0	0.220376	2.0219	0.484772	0	0	150	104	0	144	0	0
ENST00000389749.9	chr14	519	1	3172	837	89	2246	TRMT61A	TAG	TAGG	17.1333	16.6854	0.223964	0.223964	153	149	2	2	5.40141	19.9347	2.51646	0.0997171	0.00500218	165	18	0	159	0	0
ENST00000264350.8	chr4	380	1	3466	3042	145	279	HERC5	TGA	TGAC	46.0247	44.5689	1.45577	0	411	398	13	0	13.2789	14.6512	10.0398	0	0	90	3	0	84	0	0
ENST00000423485.6	chr17	488	-1	5650	4563	99	988	TOP2A	TAA	TAAA	721.502	720.158	1.11982	0.223964	6443	6431	10	2	127.699	157.826	11.3113	0.226685	0.0014363	21	29	0.111982	15	7.46548	0.0473021
ENST00000287461.7	chr16	384	-1	3502	1470	332	1700	ZNF689	TAG	TAGA	27.3237	16.9093	9.96642	0.447929	244	151	89	4	7.8023	11.5029	30.0193	0.263488	0.0229061	123	33	0.111982	117	0.957113	0.083206
ENST00000378555.8	chr7	653	-1	5941	1644	263	4034	PODXL	TAG	TAGT	23.6283	21.9485	1.56775	0.111982	211	196	14	1	3.97715	13.3507	5.96103	0.0277596	0.00207927	141	66	0	135	0	0
ENST00000317025.13	chr8	198	-1	10723	4281	511	5931	NSD3	TAA	TAAA	52.4077	47.4805	4.70325	0.223964	468	424	42	2	4.88741	11.091	9.20402	0.0377617	0.00340472	33	133	0.111982	27	4.14749	0.373952
ENST00000256649.9	chr1	968	-1	3491	1710	542	1239	TRIM45	TGA	TGAT	6.83092	5.71109	0.895858	0.223964	61	51	8	2	1.95672	3.33982	1.65287	0.180762	0.0541233	45	20	0	39	0	0
ENST00000221494.10	chr19	71	1	1574	1362	109	103	SF3A2	TGA	TGAG	116.797	110.638	6.15902	0	1043	988	55	0	74.2042	81.2324	56.5048	0	0	96	1	0	90	0	0
ENST00000347230.9	chr14	308	-1	9629	7587	134	1908	ZFYVE26	TGA	TGAC	26.6518	24.4121	2.23964	0	238	218	20	0	2.76787	3.21763	16.7138	0	0	54	18	0	48	0	0
ENST00000618250.4	chr12	22	1	2025	684	283	1058	RHNO1	TGA	TGAC	14.7817	7.83876	5.93506	1.00784	132	70	53	9	7.29958	11.4602	20.9719	0.95259	0.0831218	252	22	0.335947	246	1.36564	0.119164
ENST00000317905.10	chr17	929	-1	3624	2943	119	562	RECQL5	TGA	TGAC	15.9015	15.2296	0.671893	0	142	136	6	0	4.38783	5.17485	5.64616	0	0	45	3	0	39	0	0
ENST00000228495.11	chr12	749	-1	3875	909	32	2934	KCTD10	TGA	TGAG	42.7772	41.7694	0.895858	0.111982	382	373	8	1	11.0393	45.9509	27.9956	0.0381671	0.000830606	153	48	0	147	0	0
ENST00000356628.4	chr9	693	-1	2596	312	337	1947	NRARP	TGA	TGAT	4.92722	0.671893	4.03136	0.223964	44	6	36	2	1.898	2.1535	11.9625	0.115031	0.0534155	189	26	0	183	0	0
ENST00000555818.5	chr14	330	1	7786	5382	342	2062	SIPA1L1	TAG	TAGG	21.9485	20.1568	1.79172	0	196	180	16	0	2.81897	3.74523	5.23894	0	0	48	36	0	42	0	0
ENST00000406948.7	chr16	741	1	2202	1698	128	376	ACSF3	TGA	TGAC	17.2453	16.6854	0.559911	0	154	149	5	0	7.83164	9.82648	4.37431	0	0	96	3	0	90	0	0
ENST00000648068.1	chr7	702	1	2211	1236	74	901	AGK	TGA	TGAG	122.845	122.061	0.559911	0.223964	1097	1090	5	2	55.5606	98.7546	7.56637	0.248573	0.00251708	36	18	0.111982	30	3.73274	0.0377982
ENST00000379376.2	chr20	64	-1	5237	948	48	4241	RASSF2	TGA	TGAG	1.56775	1.45577	0	0.111982	14	13	0	1	0.299361	1.53562	0	0.0264047	0.0171948	51	61	0	45	0	0
ENST00000257879.10	chr12	459	-1	4075	3381	210	484	ITGA7	TAG	TAGG	3.8074	3.8074	0	0	34	34	0	0	0.93433	1.12612	0	0	0	189	5	0	183	0	0
ENST00000007390.3	chr16	51	-1	1165	906	68	191	TSR3	TGA	TGAG	20.2688	19.9328	0.223964	0.111982	181	178	2	1	17.3981	22.0009	3.2936	0.586294	0.0266486	48	1	0.111982	42	2.66624	0.121188
ENST00000373711.3	chr6	354	1	748	462	168	118	CDKN1A	TAA	TAAT	8.73462	7.95074	0.783876	0	78	71	7	0	11.6773	17.2094	4.66593	0	0	72	1	0	66	0	0
ENST00000317096.8	chr3	864	-1	1369	1107	55	207	PARL	TAA	TAAA	34.4905	34.0426	0.223964	0.223964	308	304	2	2	25.194	30.7521	4.07208	1.08195	0.0351831	45	5	0.111982	39	2.87134	0.0933704
ENST00000359568.10	chr21	212	1	10481	9978	67	436	PCNT	TGA	TGAA	63.27	63.158	0.111982	0	565	564	1	0	6.03663	6.32972	1.67138	0	0	114	6	0	108	0	0
ENST00000570819.5	chr16	142	1	788	507	52	229	NAA60	TAA	TAAC	13.6618	10.8623	2.57559	0.223964	122	97	22	2	17.3374	21.4246	49.5306	0.978011	0.0456489	229	0	0.223964	223	1.00433	0.0468772
ENST00000519911.5	chr5	681	1	673	144	74	455	ATP6V0E1	TAG	TAGA	39.3058	34.8265	3.47145	1.00784	351	311	31	9	58.4038	241.851	46.9115	2.21503	0.00915869	141	4	0.559911	135	4.14749	0.017149
ENST00000533683.6	chr19	381	-1	2119	1266	282	571	SAMD1	TGA	TGAG	31.1311	26.7638	4.14334	0.223964	278	239	37	2	14.6914	21.1404	14.6927	0.392232	0.0185537	252	4	0	246	0	0
ENST00000370888.6	chr6	510	1	3114	1542	246	1326	LRRC1	TAG	TAGA	21.6126	20.1568	1.45577	0	193	180	13	0	6.94045	13.0719	5.91776	0	0	93	27	0	87	0	0
ENST00000367941.7	chr6	759	-1	15800	753	162	14885	STX7	TGA	TGAA	26.5398	23.7402	2.68757	0.111982	237	212	24	1	1.67973	31.5275	16.59	0.00752316	0.000238622	75	345	0	69	0	0
ENST00000254719.9	chr17	28	1	4295	1818	104	2373	RPA1	TGA	TGAG	251.624	249.72	1.45577	0.447929	2247	2230	13	4	58.5854	137.36	13.9978	0.188761	0.0013742	87	40	0.447929	81	5.52999	0.0402591
ENST00000515406.2	chr5	571	-1	2384	1533	802	49	TIGD6	TAA	TAAT	3.8074	3.69541	0.111982	0	34	33	1	0	1.59706	2.41058	0.139629	0	0	27	1	0	21	0	0
ENST00000325870.3	chr9	88	1	5541	1482	236	3823	DMRTA1	TAA	TAAT	1.56775	1.56775	0	0	14	14	0	0	0.282937	1.05786	0	0	0	114	83	0	108	0	0
ENST00000326873.11	chr19	37	1	2566	1269	444	853	STK11	TGA	TGAG	12.0941	9.63047	2.12766	0.335947	108	86	19	3	4.7132	7.58903	4.79203	0.393841	0.0518962	402	3	0.335947	396	0.84835	0.111786
ENST00000241051.8	chr11	286	1	1696	1503	72	121	DEPDC7	TGA	TGAG	32.1389	31.579	0.111982	0.447929	287	282	1	4	18.9498	21.0106	1.55531	3.70189	0.176191	21	6	0	15	0	0
ENST00000375654.5	chr6	246	-1	2717	1893	402	422	HSPA1L	TAA	TAAT	106.495	106.495	0	0	951	951	0	0	39.1958	56.2573	0	0	0	255	2	0	249	0	0
ENST00000308330.3	chr12	559	1	4735	2703	8	2024	LEMD3	TGA	TGAA	62.7101	61.7022	0.111982	0.895858	560	551	1	8	13.2439	22.8273	13.9978	0.442618	0.0193898	93	48	0.335947	87	3.86146	0.16916
ENST00000394854.8	chr4	418	-1	4698	1533	724	2441	PPP3CA	TGA	TGAC	69.653	61.3663	8.06272	0.223964	622	548	72	2	14.8261	40.0302	11.1364	0.0917511	0.00229205	60	48	0.111982	54	2.07375	0.0518045
ENST00000223145.10	chr7	67	1	4696	1611	549	2536	GLCCI1	TAA	TAAA	22.2845	18.1411	4.03136	0.111982	199	162	36	1	4.74541	11.2608	7.3431	0.044157	0.00392131	102	39	0	96	0	0
ENST00000610432.4	chrX	377	-1	3974	1071	56	2847	MAGT1	TAA	TAAA	294.513	291.938	0	2.57559	2630	2607	0	23	74.11	272.584	0	0.904669	0.00331886	21	55	0.335947	15	22.3964	0.0821634
ENST00000398110.6	chr22	117	-1	1923	1101	299	523	TPST2	TGA	TGAT	9.63047	7.05488	2.57559	0	86	63	23	0	5.00805	6.4077	8.61402	0	0	21	7	0	15	0	0
ENST00000471138.5	chr3	451	1	2161	1254	263	644	ARL13B	TAA	TAAA	25.9799	21.5006	4.47929	0	232	192	40	0	12.0222	17.1456	17.0315	0	0	27	17	0	21	0	0
ENST00000628514.2	chr7	190	1	1546	1383	17	146	SUGCT	TGA	TGAC	7.27885	7.27885	0	0	65	65	0	0	4.70818	5.26308	0	0	0	87	3	0	81	0	0
ENST00000369172.8	chr10	596	-1	827	669	53	105	FAM204A	TAA	TAAC	27.2117	24.0762	3.02352	0.111982	243	215	27	1	32.9041	35.9883	57.0476	1.0665	0.0296346	51	4	0	45	0	0
ENST00000530878.5	chr1	1350	1	2849	1473	398	978	NOS1AP	TAG	TAGG	5.37515	4.92722	0.447929	0	48	44	4	0	1.88668	3.34502	1.12545	0	0	69	9	0	63	0	0
ENST00000534898.8	chr14	152	1	2566	1719	354	493	KIAA0391	TAG	TAGA	69.429	60.5824	8.8466	0	620	541	79	0	27.0573	35.2428	24.9904	0	0	21	8	0	15	0	0
ENST00000566497.5	chr15	459	-1	1644	1131	56	457	MFGE8	TAG	TAGT	50.9519	50.728	0.111982	0.111982	455	453	1	1	30.9927	44.8523	1.99968	0.245038	0.00546321	27	3	0	21	0	0
ENST00000259939.3	chr6	83	1	4991	879	311	3801	RNF144B	TAA	TAAA	2.91154	2.46361	0.447929	0	26	22	4	0	0.583358	2.80274	1.44029	0	0	33	75	0	27	0	0
ENST00000337221.8	chr8	146	1	1865	1368	327	170	SCARA3	TGA	TGAT	2.01568	2.01568	0	0	18	18	0	0	1.08079	1.47345	0	0	0	132	4	0	126	0	0
ENST00000610283.4	chr14	332	-1	4475	1206	300	2969	DPF3	TAA	TAAA	3.35947	3.24749	0	0.111982	30	29	0	1	0.750719	2.69277	0	0.0377172	0.0140068	30	38	0	24	0	0
ENST00000367351.4	chr6	836	1	1290	708	53	529	ULBP2	TGA	TGAG	4.59127	4.14334	0.223964	0.223964	41	37	2	2	3.55913	5.85218	4.22575	0.423373	0.0723446	27	18	0	21	0	0
ENST00000227868.8	chr11	300	1	2344	1473	78	793	PDHX	TAG	TAGT	64.8377	64.3898	0.223964	0.223964	579	575	2	2	27.6611	43.7134	2.87134	0.282427	0.00646088	33	27	0	27	0	0
ENST00000381870.7	chr17	49	1	2425	1170	453	802	CTNS	TGA	TGAC	17.9172	14.4457	3.47145	0	160	129	31	0	7.38852	12.3468	7.66324	0	0	192	8	0	186	0	0
ENST00000361603.7	chrX	490	1	6382	5025	196	1161	COL4A5	TAA	TAAC	74.2442	71.5567	2.57559	0.111982	663	639	23	1	11.6334	14.2401	13.1408	0.0964533	0.00677334	36	26	0	30	0	0
ENST00000359775.10	chr6	863	1	7289	1434	826	5029	ZDHHC14	TGA	TGAC	4.70325	2.35163	2.35163	0	42	21	21	0	0.645254	1.63991	2.84701	0	0	57	85	0	51	0	0
ENST00000330687.8	chr16	533	-1	3369	672	176	2521	CMTM4	TAG	TAGA	3.69541	3.24749	0.335947	0.111982	33	29	3	1	1.09689	4.83257	1.90879	0.0444198	0.00919175	45	44	0	39	0	0
ENST00000518977.5	chr5	590	-1	2155	1875	225	55	TNIP1	TAG	TAGA	22.6204	20.8287	1.79172	0	202	186	16	0	10.4967	11.1086	7.96318	0	0	48	1	0	42	0	0
ENST00000449692.3	chr11	635	-1	1514	846	25	643	C11orf68	TAG	TAGG	15.5655	15.4536	0.111982	0	139	138	1	0	10.2811	18.2666	4.47929	0	0	111	6	0	105	0	0
ENST00000265164.7	chr4	452	-1	1589	849	44	696	CASP6	TAA	TAAT	22.0605	21.6126	0.223964	0.223964	197	193	2	2	13.8833	25.4565	5.0901	0.321788	0.0126407	18	20	0.223964	12	18.6637	0.733161
ENST00000398868.7	chr11	555	-1	7090	1593	271	5226	ATL3	TAG	TAGC	56.1031	54.5354	1.00784	0.559911	501	487	9	5	7.91299	34.2344	3.71897	0.10714	0.00312959	174	115	0.223964	168	1.33312	0.038941
ENST00000373132.3	chr1	464	-1	3576	1275	176	2125	STK40	TAA	TAAC	6.27101	5.59911	0.447929	0.223964	56	50	4	2	1.75364	4.39146	2.54505	0.105395	0.024	186	16	0	180	0	0
ENST00000287196.13	chr15	325	-1	2580	1860	453	267	PARP6	TGA	TGAG	3.02352	2.23964	0.783876	0	27	20	7	0	1.17191	1.20411	1.73041	0	0	90	5	0	84	0	0
ENST00000521604.7	chr8	255	-1	2732	873	317	1542	TCEA1	TGA	TGAG	52.1837	48.9362	2.79956	0.447929	466	437	25	4	19.1009	56.0553	8.83141	0.290486	0.00518213	51	34	0.111982	45	2.48849	0.0443936
ENST00000445061.6	chr3	251	1	3810	3552	191	67	DHX30	TGA	TGAG	239.978	229.9	9.85444	0.223964	2143	2053	88	2	62.9863	64.724	51.5939	3.34275	0.0516463	67	0	0.223964	61	3.67155	0.0567263
ENST00000329235.6	chrX	68	-1	2192	441	238	1513	AP1S2	TAA	TAAC	32.5868	30.3472	1.9037	0.335947	291	271	17	3	14.8663	68.8145	7.99873	0.22204	0.00322665	75	34	0	69	0	0
ENST00000314994.5	chr16	760	-1	3015	531	904	1580	CENPBD1	TAG	TAGA	5.15118	0.895858	3.91938	0.335947	46	8	35	3	1.70852	1.68711	4.3356	0.212625	0.126028	99	22	0.111982	93	1.20411	0.71371
ENST00000252530.9	chr19	693	1	1226	1017	13	196	FAM98C	TAA	TAAA	5.26317	5.26317	0	0	47	47	0	0	4.29296	5.17519	0	0	0	78	2	0	72	0	0
ENST00000368918.8	chr1	1078	1	8762	1314	168	7280	GABPB2	TAA	TAAT	6.04704	3.69541	2.23964	0.111982	54	33	20	1	0.690144	2.81234	13.3312	0.0153822	0.00546953	48	116	0.111982	42	2.66624	0.948052
ENST00000373063.7	chr6	392	1	5865	1971	452	3442	FOXP4	TAA	TAAG	18.813	16.2374	2.57559	0	168	145	23	0	3.20768	8.23817	5.69821	0	0	153	34	0	147	0	0
ENST00000372499.5	chr10	326	1	854	564	209	81	LRMDA	TGA	TGAA	0.671893	0.671893	0	0	6	6	0	0	0.786761	1.1913	0	0	0	81	0	0	75	0	0
ENST00000310054.9	chr19	768	1	2567	1482	40	1045	CYP2S1	TGA	TGAA	4.59127	4.59127	0	0	41	41	0	0	1.78858	3.09802	0	0	0	282	9	0	276	0	0
ENST00000258930.7	chr15	393	-1	1553	531	323	699	CIB2	TGA	TGAG	1.45577	0.671893	0.783876	0	13	6	7	0	0.937392	1.26534	2.42686	0	0	174	2	0	168	0	0
ENST00000620139.4	chr2	950	-1	2573	612	280	1681	MREG	TAA	TAAA	3.24749	0.671893	2.01568	0.559911	29	6	18	5	1.26214	1.09787	7.19886	0.333082	0.303391	87	36	0.111982	81	1.3825	1.25926
ENST00000230053.10	chr6	538	-1	6520	939	603	4978	B3GAT2	TAA	TAAA	2.01568	1.9037	0	0.111982	18	17	0	1	0.309153	2.02737	0	0.0224954	0.0110959	69	99	0	63	0	0
ENST00000593863.5	chr19	787	1	481	405	43	33	RPS19	TAG	TAGA	1178.95	1176.82	0	2.12766	10527	10508	0	19	2451.04	2905.73	0	64.4746	0.0221888	39	1	2.12766	33	64.4746	0.0221888
ENST00000647529.1	chrX	720	-1	1388	708	245	435	BCAP31	TAA	TAAG	388.13	357.223	29.3393	1.56775	3466	3190	262	14	279.633	504.553	119.752	3.60403	0.00714301	267	2	1.34379	261	5.14861	0.0102043
ENST00000352903.6	chr15	221	1	1388	1143	18	227	TEX9	TAA	TAAG	7.27885	7.27885	0	0	65	65	0	0	5.24413	6.36819	0	0	0	18	8	0	12	0	0
ENST00000266551.8	chr12	113	1	1290	555	9	726	KLRG1	TGA	TGAA	1.11982	1.11982	0	0	10	10	0	0	0.868079	2.0177	0	0	0	60	18	0	54	0	0
ENST00000537505.6	chr17	98	1	5864	2556	197	3111	RABEP1	TGA	TGAC	41.0975	37.2901	3.69541	0.111982	367	333	33	1	7.00844	14.5892	18.7584	0.0359956	0.00246727	42	61	0.111982	36	3.11062	0.213213
ENST00000398130.6	chr18	194	1	6133	3618	226	2289	RELCH	TAG	TAGA	40.9855	39.3058	1.56775	0.111982	366	351	14	1	6.68278	10.8639	6.93695	0.0489219	0.00450314	24	58	0	18	0	0
ENST00000429927.6	chr4	308	-1	3338	1449	698	1191	CDKL2	TGA	TGAG	2.68757	2.23964	0.447929	0	24	20	4	0	0.805145	1.54565	0.641732	0	0	18	18	0	12	0	0
ENST00000312777.9	chr12	756	1	3106	1464	208	1434	TCHP	TGA	TGAC	11.5342	11.3102	0	0.223964	103	101	0	2	3.71351	7.72555	0	0.156182	0.0202162	183	19	0.223964	177	1.26534	0.163786
ENST00000377081.5	chr1	120	1	8701	5439	73	3189	KIF1B	TAA	TAAG	59.6865	59.6865	0	0	533	533	0	0	6.85973	10.9738	0	0	0	165	43	0	159	0	0
ENST00000222266.2	chr19	627	1	558	273	134	151	PSENEN	TGA	TGAC	52.0717	45.1288	6.9429	0	465	403	62	0	93.3185	165.307	51.8127	0	0	150	1	0	144	0	0
ENST00000396743.7	chrX	211	-1	2637	1668	55	914	OTUD5	TGA	TGAT	56.2151	55.7672	0.223964	0.223964	502	498	2	2	21.3178	33.4335	4.07208	0.245038	0.0073291	312	4	0.111982	306	0.365955	0.0109457
ENST00000290299.7	chr21	103	-1	711	609	35	67	ATP5PO	TAA	TAAA	446.249	442.89	2.23964	1.11982	3985	3955	20	10	627.636	727.241	63.9899	16.7138	0.0229824	36	1	0.447929	30	14.931	0.020531
ENST00000324871.12	chr12	536	-1	1333	798	16	519	METTL1	TGA	TGAC	27.0997	26.8757	0.111982	0.111982	242	240	1	1	20.3299	33.6789	6.99889	0.215765	0.00640655	18	12	0.111982	12	9.33185	0.277083
ENST00000315013.9	chr5	4	1	2637	2205	51	381	EXOC3	TAG	TAGC	34.4905	31.9149	2.57559	0	308	285	23	0	13.0795	14.4739	50.5018	0	0	102	3	0	96	0	0
ENST00000268668.11	chr16	76	1	630	486	81	63	NDUFB10	TGA	TGAG	230.124	228.22	1.34379	0.559911	2055	2038	12	5	365.275	469.588	16.59	8.88748	0.0189261	48	1	0.559911	42	13.3312	0.0283892
ENST00000373563.8	chr2	1081	1	5802	3867	189	1746	GIGYF2	TGA	TGAG	104.927	100.112	4.14334	0.671893	937	894	37	6	18.0847	25.8888	21.9225	0.384819	0.0148643	183	23	0.335947	177	1.898	0.0733136
ENST00000393795.7	chr17	581	-1	1371	621	103	647	PSMC3IP	TGA	TGAG	7.72678	7.61479	0	0.111982	69	68	0	1	5.63587	12.2621	0	0.173079	0.0141149	117	13	0	111	0	0
ENST00000322563.8	chr11	786	-1	1855	1032	89	734	WNT11	TGA	TGAG	3.69541	3.58343	0.111982	0	33	32	1	0	1.99214	3.47232	1.25823	0	0	222	8	0	216	0	0
ENST00000330828.2	chr12	177	1	1639	705	198	736	C12orf60	TAG	TAGG	6.60695	6.15902	0.447929	0	59	55	4	0	4.03109	8.7362	2.26227	0	0	42	23	0	36	0	0
ENST00000340356.9	chr20	471	-1	1817	1122	117	578	SOX18	TAG	TAGG	4.92722	4.92722	0	0	44	44	0	0	2.71173	4.39146	0	0	0	126	4	0	120	0	0
ENST00000556529.3	chr12	808	1	764	345	148	271	MAP1LC3B2	TAA	TAAA	56.1031	55.9911	0	0.111982	501	500	0	1	73.4334	162.293	0	0.413219	0.00254613	36	5	0.111982	30	3.73274	0.023
ENST00000374552.9	chrX	318	1	5190	1143	190	3857	EDA	TAG	TAGA	4.36731	3.47145	0.671893	0.223964	39	31	6	2	0.841485	3.03714	3.53628	0.058067	0.019119	87	52	0	81	0	0
ENST00000375299.8	chr13	297	1	2325	1398	33	894	UPF3A	TGA	TGAG	4.92722	4.92722	0	0	44	44	0	0	2.11923	3.52448	0	0	0	60	16	0	54	0	0
ENST00000379378.8	chr16	552	1	2065	1209	67	789	E2F4	TGA	TGAC	21.1646	20.3808	0	0.783876	189	182	0	7	10.2492	16.8575	0	0.993505	0.0589354	93	6	0.671893	87	7.72291	0.458128
ENST00000392837.9	chr12	724	1	5003	1650	58	3295	RIC8B	TAA	TAAA	11.8701	11.5342	0.223964	0.111982	106	103	2	1	2.3726	6.99041	3.86146	0.0339855	0.00486174	54	61	0	48	0	0
ENST00000360001.10	chr1	16	-1	1911	1056	257	598	SDF4	TGA	TGAG	55.5432	42.4413	13.1019	0	496	379	117	0	29.065	40.1906	50.9802	0	0	192	9	0	186	0	0
ENST00000323180.10	chr11	335	-1	3630	1872	362	1396	PHF21A	TAA	TAAC	7.39083	6.60695	0.671893	0.111982	66	59	6	1	2.03604	3.52936	1.85606	0.0802165	0.0227284	57	22	0.111982	51	2.19573	0.622134
ENST00000322088.11	chr19	1097	1	5307	1737	39	3531	PPP2R1A	TGA	TGAT	503.36	488.579	13.4379	1.34379	4495	4363	120	12	94.8484	281.277	344.561	0.380568	0.001353	222	59	1.00784	216	4.66593	0.0165884
ENST00000451301.5	chrX	456	-1	1785	834	296	655	MORF4L2	TGA	TGAG	646.585	549.833	95.9688	0.783876	5774	4910	857	7	362.233	659.272	324.219	1.19676	0.00181527	72	13	0.335947	66	5.0901	0.00772079
ENST00000370132.8	chr1	843	-1	10754	1416	8	9330	DBT	TGA	TGAA	46.9206	46.6966	0	0.223964	419	417	0	2	4.36308	32.9778	0	0.0240048	0.000727906	21	183	0	15	0	0
ENST00000219431.4	chr16	2	1	1148	864	225	59	MPG	TGA	TGAG	36.1703	34.6025	1.45577	0.111982	323	309	13	1	31.5072	40.0492	6.47009	1.898	0.0473918	39	1	0	33	0	0
ENST00000216832.9	chr14	172	1	3492	2121	20	1351	PNN	TAA	TAAT	183.987	183.539	0.111982	0.335947	1643	1639	1	3	52.6881	86.5341	5.59911	0.248665	0.00287361	51	37	0.111982	45	2.48849	0.0287574
ENST00000611699.1	chr22	228	1	858	609	27	222	NOL12	TGA	TGAG	36.9541	36.3942	0.223964	0.335947	330	325	2	3	43.0701	59.7606	8.29498	1.51327	0.0253222	30	4	0.111982	24	4.66593	0.0780769
ENST00000252288.7	chr19	46	-1	1076	678	71	327	GAMT	TGA	TGAG	26.0919	25.9799	0	0.111982	233	232	0	1	24.2489	38.3184	0	0.342453	0.00893705	129	4	0	123	0	0
ENST00000392622.3	chr1	1152	-1	502	264	153	85	S100A13	TAA	TAAA	60.0225	51.7358	8.1747	0.111982	536	462	73	1	119.567	195.969	53.4294	1.31744	0.00672269	39	1	0	33	0	0
ENST00000329276.10	chr20	33	1	1868	1752	23	93	NOP56	TAG	TAGA	235.947	235.947	0	0	2107	2107	0	0	126.31	134.673	0	0	0	51	1	0	45	0	0
ENST00000219611.7	chr16	18	1	4843	3228	501	1114	CAPN15	TGA	TGAC	11.7581	10.3024	1.11982	0.335947	105	92	10	3	2.42786	3.19156	2.23517	0.301568	0.0944891	63	5	0	57	0	0
ENST00000266546.10	chr12	85	1	4140	2838	444	858	CLSTN3	TAA	TAAG	32.8108	30.9071	1.79172	0.111982	293	276	16	1	7.92531	10.8905	4.0354	0.130515	0.0119844	45	4	0	39	0	0
ENST00000220514.8	chr15	98	-1	1156	657	24	475	OIP5	TGA	TGAT	32.5868	32.2509	0	0.335947	291	288	0	3	28.1893	49.0881	0	0.707256	0.0144079	18	15	0	12	0	0
ENST00000229030.4	chr12	915	1	3236	1713	478	1045	FZD10	TGA	TGAA	3.02352	2.01568	1.00784	0	27	18	9	0	0.934339	1.1767	2.10845	0	0	138	14	0	132	0	0
ENST00000372887.5	chr20	285	1	724	162	297	265	PKIG	TAG	TAGG	3.1355	0.671893	2.46361	0	28	6	22	0	4.33081	4.14749	8.29498	0	0	96	1	0	90	0	0
ENST00000325285.8	chr9	660	-1	2317	1668	162	487	FBXW5	TGA	TGAG	12.43	11.7581	0.671893	0	111	105	6	0	5.36471	7.04924	4.14749	0	0	168	2	0	162	0	0
ENST00000389074.6	chr5	179	1	727	450	115	162	SHISAL2B	TAA	TAAC	0.783876	0.783876	0	0	7	7	0	0	1.07823	1.74195	0	0	0	66	3	0	60	0	0
ENST00000590853.5	chr19	382	-1	1056	342	179	535	PRKACA	TAA	TAAA	4.36731	3.8074	0.335947	0.223964	39	34	3	2	4.13571	11.1327	1.8768	0.418625	0.0376031	105	5	0	99	0	0
ENST00000558134.5	chr15	446	-1	926	525	8	393	SEC11A	TGA	TGAT	122.733	121.501	0.559911	0.671893	1096	1085	5	6	132.541	231.43	69.9889	1.70965	0.00738734	57	5	0.223964	51	4.39146	0.0189753
ENST00000300027.12	chr15	462	1	4668	3774	98	796	FANCI	TAA	TAAA	207.615	206.159	1.2318	0.223964	1854	1841	11	2	44.4762	54.6262	12.5694	0.281362	0.00515069	18	17	0	12	0	0
ENST00000585334.1	chr19	84	-1	729	564	93	72	DIRAS1	TGA	TGAG	4.92722	4.36731	0.559911	0	44	39	5	0	6.75887	7.74345	6.02055	0	0	39	1	0	33	0	0
ENST00000333219.8	chr13	269	1	5074	807	866	3401	ING1	TAG	TAGT	3.8074	2.12766	1.56775	0.111982	34	19	14	1	0.750374	2.63651	1.81034	0.0329263	0.0124886	24	77	0	18	0	0
ENST00000316626.5	chr3	559	-1	1591	1269	226	96	GSK3B	TGA	TGAA	40.0896	37.626	2.23964	0.223964	358	336	20	2	25.1978	29.6501	9.90993	2.33296	0.078683	96	0	0.223964	90	2.48849	0.0839286
ENST00000651177.1	chrY	26	1	9595	7635	580	1380	USP9Y	TGA	TGAA	9.63047	9.63047	0	0	86	86	0	0	1.0037	1.26136	0	0	0	93	26	0	87	0	0
ENST00000332303.5	chr15	26	-1	4793	882	118	3793	NSMCE3	TGA	TGAA	26.9877	26.3158	0.559911	0.111982	241	235	5	1	5.63065	29.8365	4.74501	0.0295234	0.000989505	192	68	0.111982	186	0.602055	0.0201784
ENST00000567759.5	chr16	694	-1	3834	2577	177	1080	TAF1C	TGA	TGAG	16.5734	14.7817	1.67973	0.111982	148	132	15	1	4.32274	5.73599	9.49002	0.103687	0.0180766	153	12	0	147	0	0
ENST00000301788.12	chr11	535	1	746	486	63	197	POLR2G	TGA	TGAG	134.715	129.787	4.25533	0.671893	1203	1159	38	6	180.583	267.052	67.5448	3.41063	0.0127714	141	3	0.671893	135	4.97699	0.0186368
ENST00000293894.4	chr16	41	1	3042	1308	147	1587	SOX8	TGA	TGAG	1.45577	1.45577	0	0	13	13	0	0	0.478557	1.11297	0	0	0	378	25	0	372	0	0
ENST00000400199.5	chr21	18	-1	7517	3444	598	3475	NRIP1	TAA	TAAA	36.1703	32.4749	3.58343	0.111982	323	290	32	1	4.8118	9.4294	5.99236	0.0322251	0.00341751	66	83	0.111982	60	1.86637	0.197931
ENST00000257663.4	chr7	344	-1	832	369	225	238	TMEM60	TGA	TGAC	15.2296	8.95858	5.82308	0.447929	136	80	52	4	18.3048	24.278	25.8803	1.88205	0.077521	51	5	0.111982	45	2.48849	0.1025
ENST00000408999.3	chr2	530	1	5419	5244	71	104	RGPD4	TAA	TAAA	35.1624	34.9385	0	0.223964	314	312	0	2	6.48873	6.66256	0	2.1535	0.323225	60	1	0.111982	54	2.07375	0.311254
ENST00000504087.6	chr4	504	-1	8753	4257	1032	3464	ANKRD50	TAA	TAAA	47.4805	38.1859	9.18254	0.111982	424	341	82	1	5.42448	8.97015	8.89781	0.0323274	0.00360389	18	70	0	12	0	0
ENST00000610724.4	chr7	295	-1	2120	1308	5	807	TBL2	TGA	TGAG	58.3428	56.999	0.111982	1.2318	521	509	1	11	27.5202	43.5772	22.3964	1.5264	0.0350275	324	9	1.11982	318	3.52145	0.0808096
ENST00000354366.8	chr14	424	-1	13963	3462	31	10470	NRDE2	TAG	TAGA	24.5241	23.9642	0.111982	0.447929	219	214	1	4	1.75636	6.92207	3.61233	0.0427821	0.00618054	105	141	0.111982	99	1.13113	0.16341
ENST00000339397.4	chr5	361	1	2810	1257	66	1487	SRFBP1	TGA	TGAT	50.9519	50.616	0.223964	0.111982	455	452	2	1	18.1324	40.2673	3.3934	0.0753075	0.00187019	33	36	0	27	0	0
ENST00000314607.10	chr1	446	1	6949	4614	74	2261	ZMYM4	TAA	TAAA	92.9453	92.2734	0.447929	0.223964	830	824	4	2	13.3753	19.9986	6.05309	0.0990555	0.00495313	99	47	0	93	0	0
ENST00000367679.6	chr1	1435	1	2721	654	442	1625	CACYBP	TGA	TGAG	402.8	377.716	23.7402	1.34379	3597	3373	212	12	148.034	577.548	53.7109	0.826946	0.00143182	33	39	0.671893	27	24.8849	0.0430873
ENST00000409757.9	chr4	72	1	4902	2049	137	2716	TBC1D14	TGA	TGAG	16.9093	15.9015	0.335947	0.671893	151	142	3	6	3.44947	7.7606	2.45217	0.247383	0.0318768	72	33	0	66	0	0
ENST00000295148.9	chr2	75	-1	3803	2133	90	1580	WDCP	TGA	TGAT	47.2565	45.6888	1.45577	0.111982	422	408	13	1	12.4261	21.42	16.1752	0.0708748	0.00330882	63	19	0	57	0	0
ENST00000301396.8	chr17	69	-1	3628	3510	70	48	PELP1	TAG	TAGC	159.911	159.911	0	0	1428	1428	0	0	44.0768	45.5586	0	0	0	48	1	0	42	0	0
ENST00000366835.8	chr1	1721	-1	4064	2391	276	1397	TMEM63A	TGA	TGAG	15.7895	12.766	3.02352	0	141	114	27	0	3.88521	5.33918	10.9548	0	0	21	11	0	15	0	0
ENST00000456909.6	chr2	1015	1	3573	3234	87	252	STK11IP	TGA	TGAG	20.8287	20.6047	0.223964	0	186	184	2	0	5.82947	6.37128	2.5743	0	0	126	4	0	120	0	0
ENST00000367419.10	chr6	828	1	1898	960	34	904	GINM1	TAA	TAAA	27.5476	27.0997	0	0.447929	246	242	0	4	14.514	28.2289	0	0.495497	0.0175528	75	16	0.223964	69	3.24586	0.114984
ENST00000269346.9	chr17	888	1	3388	1572	11	1805	TTYH2	TAA	TAAC	7.50281	7.39083	0	0.111982	67	66	0	1	2.21452	4.70154	0	0.06204	0.0131957	261	13	0	255	0	0
ENST00000322536.8	chr11	920	1	3172	2595	79	498	DDX10	TAA	TAAA	102.016	100	1.79172	0.223964	911	893	16	2	32.1614	38.5357	22.6799	0.449728	0.0116704	42	10	0.223964	36	6.22124	0.161441
ENST00000537169.1	chrX	429	1	3273	1107	450	1716	ARMCX3	TAA	TAAC	49.9441	36.9541	12.43	0.559911	446	330	111	5	15.2594	33.3822	27.6223	0.326289	0.00977432	21	52	0	15	0	0
ENST00000220669.10	chr8	350	-1	2139	774	13	1352	ZFAND1	TAG	TAGT	24.5241	24.1882	0	0.335947	219	216	0	3	11.4652	31.2509	0	0.248481	0.00795118	171	24	0.111982	165	0.67868	0.0217172
ENST00000215793.13	chr22	151	-1	5045	2349	96	2600	SF3A1	TAG	TAGA	329.228	321.837	6.27101	1.11982	2940	2874	56	10	65.2582	137.01	65.323	0.430701	0.00314357	231	37	0.447929	225	1.9908	0.0145303
ENST00000529691.1	chr11	1045	-1	3339	1914	214	1211	ZNF202	TAG	TAGC	5.0392	4.70325	0.223964	0.111982	45	42	2	1	1.50919	2.45729	1.04656	0.0924709	0.0376312	147	19	0.111982	141	0.7942	0.323202
ENST00000271002.14	chr1	700	-1	903	501	76	326	ITGB3BP	TGA	TGAG	81.859	71.7806	9.63047	0.447929	731	641	86	4	90.6523	143.275	126.717	1.37402	0.00959008	63	9	0.223964	57	3.9292	0.0274243
ENST00000056233.4	chr7	126	1	3695	2052	295	1348	NFE2L3	TGA	TGAG	25.6439	23.9642	1.56775	0.111982	229	214	14	1	6.94017	11.6785	5.31441	0.0830729	0.00711334	36	34	0.111982	30	3.73274	0.319626
ENST00000555220.5	chr14	283	-1	1395	228	728	439	ZBTB25	TAA	TAAG	1.00784	1.00784	0	0	9	9	0	0	0.722466	4.42035	0	0	0	180	6	0	174	0	0
ENST00000494751.5	chr6	309	-1	686	375	242	69	CUTA	TGA	TGAA	133.595	115.902	17.4692	0.223964	1193	1035	156	2	194.745	309.071	72.1869	3.24586	0.010502	30	1	0.111982	24	4.66593	0.0150966
ENST00000266673.9	chr12	594	1	5611	978	588	4045	TMEM19	TGA	TGAA	19.149	16.5734	2.57559	0	171	148	23	0	3.41275	16.9462	4.38026	0	0	165	80	0	159	0	0
ENST00000398316.7	chr13	149	1	5669	3396	81	2192	FNDC3A	TGA	TGAA	66.8534	65.2857	1.34379	0.223964	597	583	12	2	11.7928	19.2243	16.59	0.102174	0.00531482	21	67	0	15	0	0
ENST00000344099.4	chr19	522	-1	2918	1896	148	874	ZNF14	TAA	TAAG	8.51065	8.06272	0.447929	0	76	72	4	0	2.9166	4.25249	3.02655	0	0	48	20	0	42	0	0
ENST00000337343.8	chr13	112	1	4201	3630	15	556	DGKH	TAA	TAAT	12.2061	12.2061	0	0	109	109	0	0	2.90551	3.36255	0	0	0	96	13	0	90	0	0
ENST00000506447.5	chr18	52	1	7915	7581	74	260	CEP192	TAA	TAAC	48.2643	48.1524	0.111982	0	431	430	1	0	6.09783	6.35172	1.51327	0	0	21	3	0	15	0	0
ENST00000614261.4	chr2	1062	1	4930	2424	152	2354	ARMC9	TAA	TAAG	23.4043	22.8444	0.335947	0.223964	209	204	3	2	4.74732	9.42425	2.21018	0.0951421	0.0100955	669	22	0.223964	663	0.337805	0.0358442
ENST00000305879.8	chr12	438	-1	762	471	80	211	GTSF1	TAA	TAAC	19.4849	18.3651	1.00784	0.111982	174	164	9	1	25.5707	38.9917	12.598	0.530722	0.0136111	87	4	0.111982	81	1.3825	0.0354562
ENST00000531165.5	chr11	360	-1	3605	1512	273	1820	CELF1	TGA	TGAG	149.944	144.569	4.81524	0.559911	1339	1291	43	5	41.5934	95.6145	17.6382	0.307644	0.00321754	27	26	0	21	0	0
ENST00000476842.1	chr3	358	1	477	147	145	185	SMIM4	TGA	TGAC	23.2923	16.2374	7.05488	0	208	145	63	0	48.8308	110.459	48.6544	0	0	162	2	0	156	0	0
ENST00000327490.8	chr17	951	1	1401	462	152	787	UBALD2	TGA	TGAG	8.73462	7.50281	1.2318	0	78	67	11	0	6.23456	16.2398	8.10398	0	0	228	15	0	222	0	0
ENST00000275016.3	chr6	466	-1	2387	1377	230	780	CYP39A1	TGA	TGAC	6.60695	4.81524	1.79172	0	59	43	16	0	2.76789	3.4969	7.79007	0	0	69	17	0	63	0	0
ENST00000389156.9	chr5	228	-1	6073	1980	213	3880	FAM169A	TGA	TGAA	25.6439	25.532	0	0.111982	229	228	0	1	4.22261	12.8949	0	0.0288614	0.0022382	39	96	0	33	0	0
ENST00000432561.6	chr12	937	-1	2603	1962	68	573	CHFR	TAA	TAAG	5.71109	5.15118	0.447929	0.111982	51	46	4	1	2.19404	2.62548	6.58719	0.195431	0.0744366	57	5	0	51	0	0
ENST00000589018.5	chr19	677	-1	399	246	89	64	ZFP30	TAG	TAGG	3.02352	2.35163	0.671893	0	27	21	6	0	7.57775	9.55946	7.54937	0	0	63	1	0	57	0	0
ENST00000215912.9	chr22	171	-1	2422	759	178	1485	PIK3IP1	TGA	TGAG	2.12766	1.79172	0.335947	0	19	16	3	0	0.878473	2.36063	1.88734	0	0	318	16	0	312	0	0
ENST00000337392.10	chr19	868	1	2425	1977	10	438	CLPTM1	TAG	TAGT	133.259	133.035	0	0.223964	1190	1188	0	2	54.9521	67.2913	0	0.511334	0.00759882	147	1	0.111982	141	0.7942	0.0118024
ENST00000539286.5	chr7	421	1	654	264	123	267	BRI3	TGA	TGAT	4.92722	4.70325	0.223964	0	44	42	2	0	7.53397	17.8154	1.82085	0	0	72	1	0	66	0	0
ENST00000305242.9	chr10	118	-1	3527	3102	87	338	ARMC4	TGA	TGAA	12.43	11.7581	0.671893	0	111	105	6	0	3.52425	3.7905	7.72291	0	0	39	7	0	33	0	0
ENST00000643390.1	chr1	752	1	1828	1479	116	233	MIGA1	TAA	TAAA	27.9956	25.42	2.57559	0	250	227	23	0	15.3149	17.1873	22.2034	0	0	96	8	0	90	0	0
ENST00000258436.10	chr2	517	-1	5248	1392	72	3784	MFSD9	TAG	TAGA	6.60695	6.38299	0	0.223964	59	57	0	2	1.25895	4.58548	0	0.0591872	0.0129075	63	70	0	57	0	0
ENST00000647468.2	chr6	866	-1	3891	1932	118	1841	SERAC1	TAA	TAAC	28.7794	28.6675	0	0.111982	257	256	0	1	7.39641	14.8382	0	0.0608269	0.00409933	30	26	0	24	0	0
ENST00000395769.6	chr10	167	-1	1803	843	233	727	2020-03-08	TGA	TGAT	2.23964	1.9037	0.223964	0.111982	20	17	2	1	1.24218	2.25824	0.961221	0.154033	0.0682094	36	10	0	30	0	0
ENST00000381280.4	chr14	322	1	3621	1272	247	2102	SMOC1	TAA	TAAG	51.7358	47.0325	4.59127	0.111982	462	420	41	1	14.2877	36.9753	18.5881	0.0532741	0.0014408	108	25	0	102	0	0
ENST00000532090.2	chr11	625	-1	4766	2604	205	1957	AP5B1	TGA	TGAG	22.8444	21.8365	0.895858	0.111982	204	195	8	1	4.7932	8.38577	4.37004	0.0572214	0.00682363	183	25	0	177	0	0
ENST00000578049.3	chr1	986	-1	6877	615	128	6134	SEC22B	TGA	TGAA	54.9833	46.5846	8.1747	0.223964	491	416	73	2	7.99524	75.7473	63.8649	0.036512	0.000482023	24	113	0.111982	18	6.22124	0.0821314
ENST00000348459.10	chr10	419	1	3083	2484	128	471	HELLS	TAA	TAAA	308.959	301.792	6.60695	0.559911	2759	2695	59	5	100.214	121.494	51.6168	1.18877	0.00978457	18	17	0	12	0	0
ENST00000512111.1	chr4	366	-1	3200	1830	379	991	KLHL8	TGA	TGAT	46.4726	42.4413	3.91938	0.111982	415	379	35	1	14.5227	23.192	10.3414	0.112999	0.00487235	27	20	0	21	0	0
ENST00000306627.7	chr3	102	1	1466	549	213	704	UBE2E1	TAA	TAAA	147.033	135.163	10.4143	1.45577	1313	1207	93	13	100.295	246.198	48.8937	2.06785	0.00839916	57	17	0.559911	51	10.9787	0.0445928
ENST00000313732.8	chr16	704	-1	3397	894	347	2156	ZDHHC7	TGA	TGAG	11.5342	5.26317	5.82308	0.447929	103	47	52	4	3.3954	5.88721	16.7812	0.207759	0.0352899	60	28	0.223964	54	4.14749	0.704492
ENST00000381309.7	chr9	38	1	4610	3138	559	913	KDM4C	TAG	TAGT	24.7481	23.8522	0.895858	0	221	213	8	0	5.36835	7.60109	1.60261	0	0	117	13	0	111	0	0
ENST00000374847.5	chr9	365	-1	4178	1179	295	2704	TMEM246	TAG	TAGG	17.4692	14.1098	3.02352	0.335947	156	126	27	3	4.18124	11.9676	10.2492	0.124241	0.0103814	117	47	0.111982	111	1.00885	0.0842986
ENST00000376936.9	chr1	129	-1	2751	2625	32	94	EXOSC10	TAG	TAGT	123.292	122.733	0	0.559911	1101	1096	0	5	44.8173	46.7553	0	5.9565	0.127397	75	1	0.447929	69	6.49172	0.138845
ENST00000512960.5	chr4	514	1	2955	2496	393	66	JADE1	TGA	TGAT	34.3786	33.3707	0.783876	0.223964	307	298	7	2	11.634	13.3697	1.99459	3.3934	0.253813	51	1	0.223964	45	4.97699	0.37226
ENST00000252329.3	chr7	18	-1	962	336	547	79	PSMG3	TGA	TGAC	21.2766	20.1568	1.11982	0	190	180	10	0	22.1171	59.9905	2.04721	0	0	79	0	0	73	0	0
ENST00000264639.9	chr17	477	1	2102	1572	158	372	PSMD3	TGA	TGAG	270.885	250.28	20.3808	0.223964	2419	2235	182	2	128.87	159.211	128.992	0.602055	0.00378148	348	1	0.223964	342	0.654867	0.00411319
ENST00000262367.9	chr16	149	-1	10758	7296	804	2658	CREBBP	TAG	TAGC	102.464	92.8333	8.95858	0.671893	915	829	80	6	9.52442	12.7239	11.1425	0.252782	0.0198667	69	31	0.111982	63	1.7775	0.139698
ENST00000606117.1	chr6	63	1	3877	900	290	2687	SIRT5	TAA	TAAG	9.18254	6.9429	2.23964	0	82	62	20	0	2.36847	7.71433	7.72291	0	0	36	49	0	30	0	0
ENST00000356413.5	chrX	321	1	1637	987	313	337	IGBP1	TGA	TGAT	39.8657	38.5219	1.34379	0	356	344	12	0	24.3529	39.0293	4.29325	0	0	174	5	0	168	0	0
ENST00000373547.8	chr9	483	-1	4073	885	94	3094	PPP6C	TGA	TGAG	152.296	151.288	0.559911	0.447929	1360	1351	5	4	37.3916	170.947	5.9565	0.144773	0.000846891	21	58	0.111982	15	7.46548	0.0436714
ENST00000321867.6	chr12	923	1	5277	3120	374	1783	ULK1	TGA	TGAC	15.4536	12.9899	2.12766	0.335947	138	116	19	3	2.92847	4.16344	5.68894	0.188417	0.045255	108	13	0.223964	102	2.19573	0.527383
ENST00000309971.8	chr9	531	1	3276	2064	100	1112	GLE1	TGA	TGAT	58.1188	57.8948	0.111982	0.111982	519	517	1	1	17.7408	28.0498	1.11982	0.100703	0.00359016	261	19	0.111982	255	0.439146	0.0156559
ENST00000333090.5	chr11	791	1	2540	1029	51	1460	TSKU	TGA	TGAC	2.35163	2.35163	0	0	21	21	0	0	0.925837	2.28535	0	0	0	27	15	0	21	0	0
ENST00000262525.6	chr16	390	-1	6038	2577	205	3256	ZNF629	TGA	TGAA	39.0818	34.8265	4.25533	0	349	311	38	0	6.47264	13.5143	20.7577	0	0	90	46	0	84	0	0
ENST00000392568.7	chr14	543	-1	809	636	97	76	NUDT14	TGA	TGAG	3.47145	3.47145	0	0	31	31	0	0	4.29104	5.45825	0	0	0	76	0	0	70	0	0
ENST00000454497.6	chr4	549	-1	7024	3117	132	3775	OTUD4	TGA	TGAT	29.7873	29.3393	0.111982	0.335947	266	262	1	3	4.24079	9.41269	0.84835	0.0889925	0.00945453	81	77	0	75	0	0
ENST00000394894.8	chr5	453	1	3050	2640	106	304	KIF20A	TAA	TAAG	180.739	177.716	3.02352	0	1614	1587	27	0	59.2588	67.3166	28.5238	0	0	36	6	0	30	0	0
ENST00000376958.5	chr13	218	1	8839	1290	65	7484	GPR180	TGA	TGAT	37.738	36.9541	0.335947	0.447929	337	330	3	4	4.26949	28.6466	5.16841	0.0598515	0.00208931	51	170	0	45	0	0
ENST00000433688.2	chr11	557	-1	5671	2004	147	3520	C11orf95	TAG	TAGC	6.71893	6.04704	0.223964	0.447929	60	54	2	4	1.18479	3.01749	1.52357	0.127253	0.0421717	105	43	0	99	0	0
ENST00000381663.8	chrX	0	1	1818	939	238	641	PLCXD1	TGA	TGAC	12.766	11.3102	1.11982	0.335947	114	101	10	3	7.02199	12.0449	4.70514	0.524098	0.0435118	66	6	0	60	0	0
ENST00000350669.5	chr12	207	-1	1258	972	92	194	LDHB	TGA	TGAC	2804.15	2714.79	74.1322	15.2296	25040	24242	661	135	2229.05	2792.99	805.785	78.503	0.0281072	21	4	12.318	15	821.203	0.294023
ENST00000341541.8	chr11	1128	-1	1259	645	464	150	THYN1	TAA	TAAC	65.8456	52.2957	13.4379	0.111982	588	467	120	1	52.2999	81.0786	28.9609	0.746548	0.00920771	141	1	0.111982	135	0.829498	0.0102308
ENST00000313115.11	chr5	599	-1	426	174	74	178	ATOX1	TAG	TAGC	95.6328	87.5701	7.05488	1.00784	854	782	63	9	224.49	503.277	95.3362	5.66202	0.0112503	54	1	0.335947	48	6.99889	0.0139066
ENST00000279068.11	chr20	420	1	2531	1125	186	1220	LSM14B	TGA	TGAG	27.4357	26.6518	0.783876	0	245	238	7	0	10.8398	23.6905	4.21439	0	0	177	21	0	171	0	0
ENST00000323116.10	chr3	855	1	7270	3501	250	3519	ATP11B	TAA	TAAA	29.4513	27.3237	1.79172	0.335947	263	244	16	3	4.05108	7.80453	7.16686	0.0954665	0.0122322	45	80	0	39	0	0
ENST00000434013.6	chr14	360	-1	830	573	27	230	NPC2	TAG	TAGC	53.8635	52.9676	0.895858	0	481	473	8	0	64.8957	92.4391	33.1799	0	0	84	1	0	78	0	0
ENST00000361055.9	chr3	425	-1	2066	1359	6	701	UBA3	TAA	TAAG	94.737	94.1771	0	0.559911	846	841	0	5	45.8553	69.2988	0	0.798732	0.0115259	81	16	0.447929	75	5.97239	0.0861831
ENST00000314328.14	chr22	97	1	6718	3321	288	3109	SPECC1L	TGA	TGAG	85.5544	82.307	2.91154	0.335947	764	735	26	3	12.7351	24.7838	10.1095	0.108056	0.00435996	27	33	0	21	0	0
ENST00000358527.6	chr1	510	1	1847	1089	394	364	EXO5	TGA	TGAA	6.27101	4.92722	1.34379	0	56	44	12	0	3.39524	4.52454	3.41063	0	0	75	1	0	69	0	0
ENST00000397801.6	chr11	1076	1	4483	4128	140	215	ROBO3	TGA	TGAC	4.47929	4.47929	0	0	40	40	0	0	0.999172	1.0851	0	0	0	18	3	0	12	0	0
ENST00000371142.9	chr10	437	-1	6055	1737	171	4147	TM9SF3	TAG	TAGA	184.883	179.508	3.69541	1.67973	1651	1603	33	15	30.5339	103.343	21.6106	0.405048	0.00391944	45	97	0.447929	39	11.4854	0.111138
ENST00000389017.5	chr17	182	-1	2530	1041	761	728	BORCS6	TGA	TGAC	5.26317	5.15118	0.111982	0	47	46	1	0	2.0803	4.9483	0.147151	0	0	93	6	0	87	0	0
ENST00000295500.8	chr2	775	-1	3885	2580	339	966	GPR155	TAA	TAAA	8.95858	8.73462	0.223964	0	80	78	2	0	2.30594	3.38551	0.660662	0	0	39	21	0	33	0	0
ENST00000581322.6	chr17	860	1	6196	966	868	4362	PITPNC1	TAA	TAAC	5.15118	2.23964	2.91154	0	46	20	26	0	0.831372	2.31847	3.35431	0	0	60	96	0	54	0	0
ENST00000455140.7	chr19	430	-1	3171	2700	19	452	EPS15L1	TAG	TAGG	61.1423	61.1423	0	0	546	546	0	0	19.2817	22.6453	0	0	0	342	3	0	336	0	0
ENST00000391338.3	chr5	337	1	1805	273	66	1466	SRP19	TAA	TAAG	46.0247	41.4334	1.45577	3.1355	411	370	13	28	25.4985	151.771	22.0571	2.13882	0.0140924	54	15	0	48	0	0
ENST00000343043.7	chr1	1212	1	1604	1164	162	278	DAP3	TAA	TAAG	122.957	114.558	8.06272	0.335947	1098	1023	72	3	76.6562	98.4174	49.7699	1.20844	0.0122787	177	4	0.223964	171	1.30973	0.013308
ENST00000598334.5	chr18	108	1	3156	2142	320	694	DTNA	TAA	TAAG	41.6574	38.074	3.47145	0.111982	372	340	31	1	13.1994	17.775	10.8483	0.161358	0.00907781	252	10	0.111982	246	0.455212	0.0256098
ENST00000543610.6	chr16	388	-1	1318	963	308	47	CCDC189	TGA	TGAC	4.14334	2.68757	1.45577	0	37	24	13	0	3.14366	2.79083	4.72652	0	0	47	0	0	41	0	0
ENST00000359626.10	chr7	279	1	3285	2166	140	979	TYW1	TGA	TGAG	32.6988	29.8993	2.79956	0	292	267	25	0	9.95398	13.8039	19.9968	0	0	24	17	0	18	0	0
ENST00000264595.7	chr4	657	-1	1992	1008	56	928	AGA	TAA	TAAT	22.1725	21.5006	0.111982	0.559911	198	192	1	5	11.1308	21.33	1.99968	0.603353	0.0282866	30	18	0.111982	24	4.66593	0.21875
ENST00000505747.6	chr2	202	-1	2160	1479	13	668	THUMPD2	TAG	TAGC	39.5297	39.4178	0	0.111982	353	352	0	1	18.3008	26.6516	0	0.167638	0.00628998	156	11	0.111982	150	0.746548	0.0280114
ENST00000340096.11	chrX	52	1	3567	3006	318	243	OFD1	TAA	TAAC	31.691	29.6753	1.9037	0.111982	283	265	17	1	8.88449	9.87202	5.98647	0.460832	0.0466806	24	10	0	18	0	0
ENST00000620338.4	chr16	569	-1	2020	1602	331	87	ACD	TGA	TGAG	30.5712	30.4592	0.111982	0	273	272	1	0	15.1342	19.0132	0.338315	0	0	45	3	0	39	0	0
ENST00000373825.7	chr6	342	-1	4303	1935	36	2332	SRPK1	TAA	TAAG	272.005	270.213	1.45577	0.335947	2429	2413	13	3	63.2128	139.645	40.438	0.144059	0.00103161	303	39	0.111982	297	0.377045	0.00270002
ENST00000254480.10	chr3	250	-1	6309	3285	90	2934	SMARCC1	TAG	TAGC	373.461	370.885	1.45577	1.11982	3335	3312	13	10	59.1949	112.903	16.1752	0.381671	0.00338053	39	44	0.111982	33	3.3934	0.030056
ENST00000255784.5	chr22	297	1	1225	657	98	470	CCDC134	TAG	TAGC	35.1624	32.1389	2.46361	0.559911	314	287	22	5	28.704	48.9177	25.1389	1.1913	0.0243532	93	3	0.447929	87	5.14861	0.105251
ENST00000596085.1	chr19	1247	1	424	144	171	109	ZNF551	TGA	TGAG	1.56775	0.895858	0.671893	0	14	8	6	0	3.69753	6.22124	3.9292	0	0	72	3	0	66	0	0
ENST00000637969.1	chr16	463	1	2844	1647	22	1175	FTO	TGA	TGAG	78.3876	78.2756	0.111982	0	700	699	1	0	27.5624	47.5262	5.0901	0	0	48	23	0	42	0	0
ENST00000314583.8	chr3	571	-1	1947	1428	78	441	HCLS1	TGA	TGAC	3.58343	3.58343	0	0	32	32	0	0	1.84049	2.50941	0	0	0	90	3	0	84	0	0
ENST00000389120.8	chr9	366	1	3893	2895	82	916	RNF20	TGA	TGAT	77.3797	77.0438	0.111982	0.223964	691	688	1	2	19.8766	26.6127	1.36564	0.244503	0.00918744	51	22	0	45	0	0
ENST00000313117.11	chr2	194	-1	2311	684	99	1528	SRSF7	TGA	TGAA	444.905	420.717	22.7324	1.45577	3973	3757	203	13	192.516	615.084	229.62	0.952729	0.00154894	63	31	0.783876	57	13.7522	0.0223583
ENST00000355112.8	chr15	482	1	5195	4221	93	881	BLM	TAA	TAAC	106.047	105.487	0.447929	0.111982	947	942	4	1	20.4133	24.9911	4.81644	0.127108	0.00508614	51	16	0.111982	45	2.48849	0.0995754
ENST00000261839.12	chr15	203	-1	6932	5196	162	1574	MYO5C	TAG	TAGC	12.318	11.0862	1.2318	0	110	99	11	0	1.77698	2.13361	7.60373	0	0	39	35	0	33	0	0
ENST00000303586.11	chr19	594	1	2534	1842	372	320	ZNF30	TAA	TAAG	5.26317	3.35947	1.9037	0	47	30	17	0	2.07702	1.82382	5.11747	0	0	123	5	0	117	0	0
ENST00000356136.8	chr11	785	1	5072	2067	192	2813	UVRAG	TGA	TGAA	14.8936	13.3259	1.34379	0.223964	133	119	12	2	2.93644	6.44697	6.99889	0.0796177	0.0123496	54	44	0.111982	48	2.33296	0.36187
ENST00000414468.3	chr19	1229	1	10124	1851	254	8019	ZNF805	TGA	TGAG	10.1904	9.29453	0.671893	0.223964	91	83	6	2	1.00656	5.02135	2.64525	0.0279292	0.00556209	192	137	0	186	0	0
ENST00000400451.7	chr22	42	1	3855	1902	472	1481	ZNF74	TAA	TAAC	12.9899	8.73462	4.03136	0.223964	116	78	36	2	3.36963	4.59233	8.54102	0.151225	0.0329299	24	20	0	18	0	0
ENST00000266022.9	chr3	305	1	3585	3339	136	110	RBM6	TAA	TAAG	39.1938	37.1781	2.01568	0	350	332	18	0	10.9327	11.1345	14.8212	0	0	84	2	0	78	0	0
ENST00000342503.8	chr14	258	-1	1658	594	302	762	RTN1	TAA	TAAA	3.8074	3.69541	0.111982	0	34	33	1	0	2.29638	6.22124	0.370802	0	0	51	18	0	45	0	0
ENST00000309318.8	chr11	570	-1	944	411	264	269	PPP1R14B	TGA	TGAC	16.6854	13.1019	3.35947	0.223964	149	117	30	2	17.6752	31.8782	12.7253	0.832582	0.0261176	222	1	0.223964	216	1.03687	0.0325261
ENST00000303809.7	chr19	871	-1	1589	1395	99	95	ZNF296	TGA	TGAG	10.4143	10.3024	0.111982	0	93	92	1	0	6.55403	7.38521	1.13113	0	0	84	1	0	78	0	0
ENST00000250237.10	chr19	290	1	1284	1179	16	89	QTRT1	TGA	TGAC	33.4827	33.4827	0	0	299	299	0	0	26.0769	28.3992	0	0	0	57	2	0	51	0	0
ENST00000369883.3	chr10	524	1	793	288	19	486	BORCS7	TAG	TAGA	15.3416	15.3416	0	0	137	137	0	0	19.3462	53.2693	0	0	0	54	12	0	48	0	0
ENST00000376234.7	chr13	244	-1	3438	2193	184	1061	TMTC4	TGA	TGAT	6.27101	6.15902	0.111982	0	56	55	1	0	1.82403	2.80849	0.608599	0	0	57	28	0	51	0	0
ENST00000594030.2	chr19	1121	1	7543	150	88	7305	ZNF765	TGA	TGAG	1.45577	0.447929	1.00784	0	13	4	9	0	0.192996	2.98619	11.4527	0	0	54	126	0	48	0	0
ENST00000398004.4	chr12	575	1	17677	909	196	16572	SLC35E3	TAA	TAAT	14.5577	11.6462	2.68757	0.223964	130	104	24	2	0.823539	12.8121	13.7121	0.0135146	0.00105484	42	265	0.111982	36	3.11062	0.242788
ENST00000256001.13	chr7	805	1	2168	1224	125	819	ACTR3B	TAG	TAGT	6.71893	6.49497	0.223964	0	60	58	2	0	3.09914	5.30635	1.79172	0	0	87	14	0	81	0	0
ENST00000311191.10	chr13	138	1	4665	2058	223	2384	LRCH1	TGA	TGAA	8.95858	8.51065	0.447929	0	80	76	4	0	1.92038	4.1354	2.00865	0	0	144	40	0	138	0	0
ENST00000251775.9	chr3	605	-1	2467	1320	24	1123	SNX4	TAA	TAAT	63.4939	63.382	0	0.111982	567	566	0	1	25.7373	48.0166	0	0.0997171	0.00207672	60	34	0.111982	54	2.07375	0.0431881
ENST00000433727.5	chr7	398	-1	986	219	139	628	BET1	TAA	TAAG	15.7895	13.6618	2.12766	0	141	122	19	0	16.0137	62.3828	15.3069	0	0	21	22	0	15	0	0
ENST00000377698.4	chr9	195	1	2983	1521	109	1353	ALDH1B1	TAA	TAAG	105.263	99.7762	5.48713	0	940	891	49	0	35.2877	65.5991	50.3406	0	0	54	30	0	48	0	0
ENST00000434507.5	chr7	802	1	2702	1794	431	477	GALNT11	TAA	TAAG	10.1904	9.74246	0.335947	0.111982	91	87	3	1	3.77142	5.43058	0.779459	0.234764	0.04323	111	11	0.111982	105	1.0665	0.196388
ENST00000539719.6	chr1	431	1	3142	1230	245	1667	ZNF362	TGA	TGAG	4.70325	4.14334	0.447929	0.111982	42	37	4	1	1.4969	3.36857	1.82828	0.0671759	0.019942	237	13	0.111982	231	0.484772	0.14391
ENST00000239878.9	chr13	94	1	3123	225	63	2835	UFM1	TAA	TAAT	42.1053	39.0818	2.23964	0.783876	376	349	20	7	13.4823	173.697	35.5499	0.276499	0.00159185	39	65	0.223964	33	6.7868	0.0390727
ENST00000333209.4	chr4	386	-1	6215	2298	1078	2839	GPRIN3	TGA	TGAA	15.0056	13.6618	1.11982	0.223964	134	122	10	2	2.41442	5.9451	1.0388	0.0788885	0.0132695	30	72	0	24	0	0
ENST00000304758.5	chrX	509	-1	6843	1995	790	4058	AMOT	TAA	TAAA	675.365	533.371	140.202	1.79172	6031	4763	1252	16	98.6943	267.354	177.471	0.441527	0.00165147	45	69	0.223964	39	5.74268	0.0214797
ENST00000314752.11	chr16	324	-1	1117	855	75	187	SULT1A1	TGA	TGAG	3.47145	3.24749	0.223964	0	31	29	2	0	3.10783	3.79823	2.98619	0	0	48	4	0	42	0	0
ENST00000438925.7	chr10	448	-1	3454	3060	32	362	MMS19	TGA	TGAG	80.8512	80.4033	0.111982	0.335947	722	718	1	3	23.408	26.2756	3.49945	0.92803	0.0353191	51	6	0.111982	45	2.48849	0.0947075
ENST00000421967.5	chr3	256	-1	1959	552	40	1367	NME6	TGA	TGAT	25.7559	25.084	0.447929	0.223964	230	224	4	2	13.1475	45.4421	11.1982	0.163837	0.00360539	57	23	0.111982	51	2.19573	0.0483193
ENST00000401949.6	chr7	242	-1	5423	1752	793	2878	GRB10	TGA	TGAC	29.6753	27.0997	1.9037	0.671893	265	242	17	6	5.47212	15.4679	2.40063	0.233458	0.0150931	147	52	0.559911	141	3.971	0.256726
ENST00000461457.1	chr7	698	1	514	258	51	205	NDUFB2	TGA	TGAG	27.7716	27.7716	0	0	248	248	0	0	54.0303	107.642	0	0	0	123	3	0	117	0	0
ENST00000314319.7	chr18	24	1	5370	1680	150	3540	ARHGAP28	TAA	TAAA	5.48713	5.0392	0.447929	0	49	45	4	0	1.02181	2.99952	2.98619	0	0	84	66	0	78	0	0
ENST00000248437.9	chr2	1000	-1	2004	1314	54	636	TUBA4A	TAA	TAAA	23.9642	23.6283	0.335947	0	214	211	3	0	11.9582	17.9819	6.22124	0	0	54	9	0	48	0	0
ENST00000456324.5	chr19	652	1	3735	846	1443	1446	ZNF146	TAA	TAAA	104.479	28.3315	74.4682	1.67973	933	253	665	15	27.9731	33.4888	51.6065	1.16164	0.0346875	72	24	0.111982	66	1.6967	0.0506648
ENST00000298717.9	chr14	51	-1	1935	1710	111	114	METTL3	TAG	TAGA	90.9296	87.0102	3.91938	0	812	777	35	0	46.992	50.8832	35.3097	0	0	51	5	0	45	0	0
ENST00000239243.7	chr5	690	1	2150	771	72	1307	MSX2	TAA	TAAG	37.2901	36.3942	0.783876	0.111982	333	325	7	1	17.3442	47.2039	10.8872	0.0856788	0.00181508	18	29	0	12	0	0
ENST00000003100.13	chr7	380	-1	3110	1497	107	1506	CYP51A1	TGA	TGAA	191.826	186.45	5.26317	0.111982	1713	1665	47	1	61.6803	124.549	49.1885	0.0743574	0.000597011	90	31	0	84	0	0
ENST00000261889.9	chr15	258	1	3328	1641	15	1672	SNX1	TGA	TGAG	76.3719	76.2599	0	0.111982	682	681	0	1	22.9483	46.4716	0	0.066975	0.0014412	255	19	0	249	0	0
ENST00000612610.4	chr21	0	1	1117	897	181	39	FP565260.3	TGA	TGAC	1.2318	1.11982	0.111982	0	11	10	1	0	1.10278	1.24841	0.618686	0	0	39	0	0	33	0	0
ENST00000334463.4	chrX	350	-1	4173	3720	110	343	ERCC6L	TGA	TGAG	77.7157	76.9318	0.559911	0.223964	694	687	5	2	18.6235	20.6806	5.0901	0.652958	0.0315735	27	8	0.223964	21	10.665	0.5157
ENST00000641407.1	chr1	140	-1	2342	1896	261	185	MTHFR	TAG	TAGA	11.3102	11.1982	0.111982	0	101	100	1	0	4.82929	5.90624	0.429051	0	0	36	2	0	30	0	0
ENST00000648566.1	chr1	777	-1	2788	669	274	1845	BCL10	TGA	TGAC	30.3472	26.6518	2.68757	1.00784	271	238	23	9	10.8849	39.8382	9.80866	0.546255	0.0137118	18	44	0	12	0	0
ENST00000411458.5	chr11	573	1	1450	1395	22	33	GPR137	TAG	TAGG	3.69541	3.69541	0	0	33	33	0	0	2.54856	2.64904	0	0	0	33	0	0	27	0	0
ENST00000592743.5	chr17	588	-1	2456	2211	44	201	EZH1	TAG	TAGC	10.3024	10.3024	0	0	92	92	0	0	4.19477	4.6596	0	0	0	33	1	0	27	0	0
ENST00000538927.1	chr12	258	1	526	348	126	52	ALG10	TGA	TGAG	12.9899	11.0862	1.9037	0	116	99	17	0	24.6957	31.857	15.1087	0	0	21	1	0	15	0	0
ENST00000259467.8	chr9	465	-1	2768	873	160	1735	PDCL	TGA	TGAA	41.5454	39.9777	1.45577	0.111982	371	357	13	1	15.0092	45.7934	9.09856	0.0645431	0.00140944	21	40	0.111982	15	7.46548	0.163025
ENST00000254325.9	chr19	376	-1	4330	2907	264	1159	RFX1	TAA	TAAG	18.813	17.3572	1.45577	0	168	155	13	0	4.34481	5.97085	5.51428	0	0	219	10	0	213	0	0
ENST00000254190.4	chr15	514	-1	4617	2376	586	1655	CHSY1	TAA	TAAT	16.5734	11.5342	5.0392	0	148	103	45	0	3.58964	4.85445	8.59932	0	0	39	33	0	33	0	0
ENST00000316937.8	chr7	456	-1	2510	1710	218	582	C7orf43	TAG	TAGC	5.82308	5.15118	0.671893	0	52	46	6	0	2.31995	3.01239	3.08208	0	0	108	6	0	102	0	0
ENST00000249700.9	chr15	197	1	9105	1023	179	7903	TMOD2	TAA	TAAA	5.37515	4.70325	0.559911	0.111982	48	42	5	1	0.590351	4.59751	3.128	0.0141696	0.00308201	45	145	0	39	0	0
ENST00000551516.1	chr12	577	1	189	138	-1	52	CPSF6	TGA	TGAA	45.9127	21.2766	24.6361	0	410	190	220	0	242.924	154.178	-24636.1	0	0	51	1	0	45	0	0
ENST00000361168.9	chr1	1204	-1	1889	1464	81	344	CLK2	TGA	TGAC	36.6182	33.8186	2.01568	0.783876	327	302	18	7	19.385	23.1002	24.8849	2.27871	0.0986447	141	3	0.783876	135	5.80649	0.251361
ENST00000649815.1	chr14	534	-1	2697	1410	323	964	AKT1	TGA	TGAG	11.7581	10.0784	1.34379	0.335947	105	90	12	3	4.35971	7.1478	4.16033	0.348492	0.0487552	516	5	0.335947	510	0.658719	0.0921569
ENST00000379638.9	chr5	338	-1	2963	537	31	2395	REEP5	TAA	TAAA	108.399	106.383	0.223964	1.79172	968	950	2	16	36.5841	198.106	7.22466	0.748107	0.00377629	54	61	0.447929	48	9.33185	0.0471053
ENST00000397238.7	chr7	791	1	3449	2703	261	485	AGAP3	TAA	TAAG	30.9071	25.8679	5.0392	0	276	231	45	0	8.96118	9.57007	19.3073	0	0	132	7	0	126	0	0
ENST00000291458.9	chr3	580	-1	675	402	1	272	CCDC58	TAA	TAAA	64.9497	64.7257	0	0.223964	580	578	0	2	96.2218	161.009	0	0.823399	0.00511398	66	9	0.111982	60	1.86637	0.0115917
ENST00000256398.13	chr8	152	1	3103	1611	70	1422	ELP3	TAA	TAAT	49.0482	47.7044	1.34379	0	438	426	12	0	15.8067	29.6117	19.197	0	0	87	19	0	81	0	0
ENST00000178638.8	chr15	252	-1	6053	1032	120	4901	CA12	TGA	TGAG	5.26317	4.59127	0.559911	0.111982	47	41	5	1	0.869514	4.44891	4.66593	0.0228489	0.00513584	246	69	0	240	0	0
ENST00000369485.9	chr6	601	-1	4780	1761	203	2816	RNGTT	TAA	TAAG	55.8791	52.9676	2.68757	0.223964	499	473	24	2	11.6902	30.0781	13.2393	0.0795328	0.00264421	18	66	0	12	0	0
ENST00000376652.8	chr20	149	1	2705	1422	157	1126	ENTPD6	TAG	TAGT	15.1176	13.6618	1.11982	0.335947	135	122	10	3	5.58876	9.60748	7.13263	0.298354	0.0310544	81	10	0.111982	75	1.4931	0.15541
ENST00000265686.8	chr11	699	1	2623	2460	93	70	TCIRG1	TAG	TAGG	2.46361	2.46361	0	0	22	22	0	0	0.939234	1.00147	0	0	0	42	1	0	36	0	0
ENST00000327423.11	chr22	177	-1	10782	6423	185	4174	PRR14L	TGA	TGAG	111.646	110.414	1.00784	0.223964	997	986	9	2	10.3549	17.1905	5.44779	0.053657	0.00312132	102	43	0	96	0	0
ENST00000254250.7	chr8	231	-1	2116	609	225	1282	THAP1	TAA	TAAA	14.1098	11.8701	2.01568	0.223964	126	106	18	2	6.66813	19.4912	8.95858	0.174699	0.008963	27	31	0	21	0	0
ENST00000219837.12	chr16	249	-1	6377	1344	66	4967	KNOP1	TAA	TAAA	49.6081	48.2643	1.00784	0.335947	443	431	9	3	7.77923	35.911	15.2703	0.0676357	0.00188343	102	87	0	96	0	0
ENST00000519676.6	chr13	129	-1	3618	843	123	2652	SLC25A30	TGA	TGAC	15.4536	12.878	2.23964	0.335947	138	115	20	3	4.2713	15.2763	18.2085	0.126677	0.00829235	18	58	0.111982	12	9.33185	0.61087
ENST00000188312.6	chr12	680	1	2419	1158	759	502	ACTR6	TAA	TAAG	90.3697	89.3618	0.783876	0.223964	807	798	7	2	37.3583	77.1691	1.03277	0.446144	0.00578139	39	14	0.223964	33	6.7868	0.0879471
ENST00000394588.3	chr15	445	-1	972	432	405	135	NMB	TGA	TGAG	3.02352	2.68757	0.335947	0	27	24	3	0	3.11062	6.22124	0.829498	0	0	30	3	0	24	0	0
ENST00000300181.7	chr7	469	-1	2273	1155	684	434	TSC22D4	TGA	TGAG	18.701	4.59127	13.9978	0.111982	167	41	125	1	8.22747	3.97513	20.4646	0.258024	0.0649095	81	6	0	75	0	0
ENST00000313080.8	chr17	957	-1	3537	2538	268	731	RHBDF2	TGA	TGAC	7.61479	6.49497	1.11982	0	68	58	10	0	2.1529	2.55909	4.17844	0	0	165	9	0	159	0	0
ENST00000334211.12	chr11	746	-1	4897	3585	729	583	ARAP1	TGA	TGAG	36.3942	29.2274	7.16686	0	325	261	64	0	7.43194	8.15268	9.83109	0	0	336	4	0	330	0	0
ENST00000250535.5	chr5	347	-1	1520	570	256	694	CDO1	TAA	TAAG	13.8858	9.96642	3.91938	0	124	89	35	0	9.13539	17.4849	15.3101	0	0	102	5	0	96	0	0
ENST00000635200.1	chr6	119	-1	903	477	44	382	AL031777.3	TGA	TGAA	669.766	588.019	75.812	5.93506	5980	5250	677	53	741.712	1232.74	1723	15.5368	0.0126034	78	4	1.45577	72	20.219	0.0164016
ENST00000316788.12	chr5	349	1	1231	549	97	585	AP3S1	TAA	TAAA	27.4357	26.8757	0.447929	0.111982	245	240	4	1	22.2873	48.954	4.61782	0.191423	0.00391026	27	9	0	21	0	0
ENST00000374338.4	chr1	309	1	2895	894	113	1888	LDLRAP1	TGA	TGAG	6.71893	6.27101	0.447929	0	60	56	4	0	2.32088	7.01455	3.96397	0	0	123	30	0	117	0	0
ENST00000005286.8	chr11	482	1	3435	3042	147	246	TMEM132A	TGA	TGAC	31.467	31.0191	0.447929	0	281	277	4	0	9.1607	10.1969	3.04714	0	0	99	2	0	93	0	0
ENST00000376511.7	chr6	193	-1	4466	2790	546	1130	PPP1R10	TAG	TAGG	82.307	68.7571	13.4379	0.111982	735	614	120	1	18.4297	24.6441	24.6115	0.0990993	0.00402122	78	14	0	72	0	0
ENST00000307720.4	chr4	605	-1	1785	1080	102	603	PPID	TAG	TAGA	105.039	102.24	2.46361	0.335947	938	913	22	3	58.8456	94.6665	24.153	0.557126	0.00588514	39	9	0	33	0	0
ENST00000316157.7	chr10	3	-1	5597	2184	35	3378	LARP4B	TGA	TGAA	98.6564	96.4167	2.01568	0.223964	881	861	18	2	17.6267	44.1468	57.5909	0.0663009	0.00150183	90	62	0	84	0	0
ENST00000361574.10	chr19	25	-1	1758	774	56	928	R3HDM4	TGA	TGAT	11.1982	11.0862	0	0.111982	100	99	0	1	6.36987	14.3233	0	0.120671	0.00842476	87	6	0.111982	81	1.3825	0.0965208
ENST00000369466.9	chr1	967	1	9394	3456	15	5923	TTF2	TAA	TAAC	127.1	126.764	0	0.335947	1135	1132	0	3	13.5299	36.6794	0	0.056719	0.00154635	27	124	0.111982	21	5.33249	0.145381
ENST00000432641.2	chr7	414	1	2015	345	1128	542	SDHAF3	TAG	TAGT	35.9463	35.0504	0.111982	0.783876	321	313	1	7	17.8394	101.595	0.099275	1.44627	0.0142355	39	11	0.111982	33	3.3934	0.0334011
ENST00000568449.5	chr16	66	1	1189	1107	15	67	EME2	TGA	TGAC	1.2318	1.2318	0	0	11	11	0	0	1.036	1.11274	0	0	0	67	0	0	61	0	0
ENST00000536171.1	chr11	481	1	1914	699	10	1205	TMEM109	TGA	TGAG	121.389	119.485	0.111982	1.79172	1084	1067	1	16	63.4215	170.937	11.1982	1.4869	0.00869853	105	10	1.2318	99	12.4425	0.0727898
ENST00000196551.8	chr19	1272	1	696	582	66	48	RPS5	TGA	TGAT	800.225	763.943	35.6104	0.671893	7145	6821	317	6	1149.75	1312.62	539.551	13.9978	0.010664	48	0	0.671893	42	15.9975	0.0121875
ENST00000374542.10	chr6	305	-1	2513	2190	144	179	DAXX	TAG	TAGC	58.9027	47.7044	11.1982	0	526	426	100	0	23.4392	21.7828	77.7655	0	0	69	1	0	63	0	0
ENST00000242285.10	chr9	178	1	1107	714	114	279	CLTA	TGA	TGAA	205.151	184.659	18.3651	2.12766	1832	1649	164	19	185.322	258.626	161.097	7.62603	0.0294868	117	1	2.01568	111	18.1593	0.0702145
ENST00000291539.11	chr21	154	1	2147	1749	188	210	PDE9A	TGA	TGAG	11.6462	11.6462	0	0	104	104	0	0	5.42438	6.65875	0	0	0	198	1	0	192	0	0
ENST00000542778.5	chr4	31	-1	2420	1587	237	596	NELFA	TAG	TAGA	53.1916	53.1916	0	0	475	475	0	0	21.98	33.5171	0	0	0	66	10	0	60	0	0
ENST00000317991.9	chr19	596	1	2650	2142	186	322	GRAMD1A	TGA	TGAG	19.037	19.037	0	0	170	170	0	0	7.18377	8.88748	0	0	0	207	3	0	201	0	0
ENST00000326181.11	chr16	90	1	3638	1980	109	1549	TRAF7	TAA	TAAC	28.2195	26.0919	1.67973	0.447929	252	233	15	4	7.75688	13.1777	15.4104	0.289173	0.0219441	108	15	0.111982	102	1.09787	0.0833123
ENST00000325954.9	chr12	842	1	3769	2403	450	916	RNF10	TGA	TGAC	74.3562	43.1132	31.243	0	664	385	279	0	19.7284	17.9414	69.429	0	0	81	23	0	75	0	0
ENST00000393238.7	chr3	647	-1	5947	1929	335	3683	TMCC1	TGA	TGAT	2.68757	2.12766	0.559911	0	24	19	5	0	0.451921	1.10299	1.67138	0	0	111	68	0	105	0	0
ENST00000588649.7	chr19	11	-1	3726	3660	19	47	POLRMT	TGA	TGAC	59.2386	59.0146	0	0.223964	529	527	0	2	15.8987	16.1242	0	4.7652	0.295531	27	1	0.111982	21	5.33249	0.330713
ENST00000254928.10	chr17	332	1	1796	1281	13	502	ERAL1	TGA	TGAC	110.75	110.414	0.111982	0.223964	989	986	1	2	61.6651	86.194	8.61402	0.446144	0.00517605	198	5	0.223964	192	1.16648	0.0135332
ENST00000311051.7	chr11	133	-1	2574	2094	77	403	APBB1	TGA	TGAA	39.7537	39.3058	0.447929	0	355	351	4	0	15.4443	18.7707	5.81726	0	0	51	7	0	45	0	0
ENST00000490341.2	chr2	1001	1	1335	693	159	483	TUBA4B	TGA	TGAA	23.7402	17.8052	0	5.93506	212	159	0	53	17.7829	25.6929	0	12.2879	0.478261	198	7	0.111982	192	0.583241	0.0227005
ENST00000332180.9	chr12	716	1	5767	3489	81	2197	WASHC4	TGA	TGAT	76.5959	76.3719	0.111982	0.111982	684	682	1	1	13.2818	21.8893	1.3825	0.0509705	0.00232856	27	51	0	21	0	0
ENST00000375772.7	chrX	245	1	2656	2304	141	211	MAGED1	TGA	TGAG	471.221	470.101	0.895858	0.223964	4208	4198	8	2	177.418	204.037	6.3536	1.06144	0.00520221	30	2	0.111982	24	4.66593	0.022868
ENST00000449354.6	chr3	77	-1	1074	405	60	609	MRPS25	TGA	TGAG	50.728	49.0482	1.45577	0.223964	453	438	13	2	47.2327	121.107	24.2628	0.367758	0.00303664	147	11	0.223964	141	1.5884	0.0131157
ENST00000325351.4	chr19	1200	-1	1976	939	34	1003	ZNF784	TAG	TAGG	4.14334	4.14334	0	0	37	37	0	0	2.09683	4.41251	0	0	0	117	14	0	111	0	0
ENST00000220058.9	chr15	271	-1	2701	1137	20	1544	MTFMT	TAG	TAGT	14.6697	14.6697	0	0	131	131	0	0	5.4312	12.9021	0	0	0	48	20	0	42	0	0
ENST00000370151.9	chr10	496	1	774	579	10	185	DPCD	TAG	TAGT	30.7951	30.6831	0.111982	0	275	274	1	0	39.787	52.9933	11.1982	0	0	185	0	0	179	0	0
ENST00000269576.6	chr17	499	-1	2098	1722	23	353	KRT10	TAA	TAAC	26.6518	4.59127	0	22.0605	238	41	0	197	12.7034	2.66624	0	62.4943	23.4391	30	7	2.68757	24	111.982	42
ENST00000562955.2	chr1	547	1	13923	10095	67	3761	SZT2	TGA	TGAG	13.2139	13.1019	0	0.111982	118	117	0	1	0.94907	1.29786	0	0.0297746	0.0229413	21	34	0	15	0	0
ENST00000328965.9	chr11	1027	1	2217	789	242	1186	OAF	TAG	TAGG	11.4222	8.95858	2.46361	0	102	80	22	0	5.15209	11.3543	10.1802	0	0	81	4	0	75	0	0
ENST00000379264.6	chr5	394	-1	6494	2136	103	4255	ACSL6	TGA	TGAA	3.35947	3.35947	0	0	30	30	0	0	0.517319	1.57278	0	0	0	51	85	0	45	0	0
ENST00000354724.8	chr8	338	-1	2152	882	98	1172	HEY1	TAA	TAAA	125.644	122.957	2.12766	0.559911	1122	1098	19	5	58.3848	139.406	21.7108	0.47774	0.00342696	18	21	0.111982	12	9.33185	0.0669399
ENST00000326043.5	chr16	674	-1	2624	1179	829	616	MAF	TGA	TGAA	49.4962	24.8601	24.6361	0	442	222	220	0	18.8629	21.0857	29.7178	0	0	138	9	0	132	0	0
ENST00000263097.9	chr19	31	1	2104	897	48	1159	CNN2	TGA	TGAG	27.0997	27.0997	0	0	242	242	0	0	12.8801	30.2115	0	0	0	465	6	0	459	0	0
ENST00000308664.10	chr12	761	1	4408	2961	668	779	ATP2A2	TAA	TAAC	409.743	396.977	12.542	0.223964	3659	3545	112	2	92.9544	134.069	18.7755	0.287503	0.00214444	63	16	0	57	0	0
ENST00000582322.1	chr18	219	1	2580	1575	171	834	SOCS6	TGA	TGAA	8.62263	7.72678	0.783876	0.111982	77	69	7	1	3.34211	4.90589	4.58407	0.134271	0.0273694	51	14	0	45	0	0
ENST00000368603.5	chr1	1163	1	1512	1155	72	285	CREB3L4	TGA	TGAG	3.1355	3.1355	0	0	28	28	0	0	2.07375	2.71472	0	0	0	156	6	0	150	0	0
ENST00000260731.5	chr10	404	1	4971	3138	240	1593	KIF11	TAA	TAAT	286.339	277.492	8.51065	0.335947	2557	2478	76	3	57.6018	88.4296	35.461	0.210889	0.00238483	42	32	0	36	0	0
ENST00000272065.10	chr2	2	1	1429	444	12	973	ACP1	TGA	TGAG	90.9296	90.4817	0	0.447929	812	808	0	4	63.6316	203.788	0	0.460359	0.00225901	36	21	0	30	0	0
ENST00000366542.6	chr1	1815	-1	7014	4722	277	2015	CEP170	TGA	TGAC	88.8019	82.8669	5.48713	0.447929	793	740	49	4	12.6607	17.5491	19.8091	0.222297	0.0126672	18	28	0	12	0	0
ENST00000354185.9	chr10	255	1	4619	2319	50	2250	DDX21	TAA	TAAT	638.635	635.051	1.11982	2.46361	5703	5671	10	22	138.263	273.847	22.3964	1.09494	0.00399835	105	47	0.895858	99	9.04907	0.0330442
ENST00000419752.3	chr3	394	1	1957	555	100	1302	FLNB	TGA	TGAA	7.39083	4.92722	2.23964	0.223964	66	44	20	2	3.77661	8.87787	22.3964	0.172016	0.0193758	30	19	0	24	0	0
ENST00000308406.9	chr17	284	1	3104	2418	380	306	MAPK7	TGA	TGAG	11.0862	10.1904	0.895858	0	99	91	8	0	3.5716	4.21439	2.35752	0	0	93	3	0	87	0	0
ENST00000396373.8	chr12	154	1	5944	1326	268	4350	ETV6	TGA	TGAA	2.57559	1.9037	0.671893	0	23	17	6	0	0.43331	1.43567	2.50707	0	0	90	58	0	84	0	0
ENST00000275603.9	chr7	252	1	2539	1563	78	898	CCT6A	TGA	TGAA	914.559	904.145	9.07056	1.34379	8167	8074	81	12	360.204	578.467	116.289	1.49642	0.00258687	30	18	0.223964	24	9.33185	0.016132
ENST00000356971.3	chr6	504	-1	6182	1866	484	3832	ICK	TGA	TGAC	8.95858	4.70325	4.14334	0.111982	80	42	37	1	1.44914	2.5205	8.56063	0.0292229	0.0115941	60	89	0	54	0	0
ENST00000426077.3	chr2	596	-1	5877	1020	418	4439	TMEM185B	TAA	TAAA	23.6283	18.4771	4.92722	0.223964	211	165	44	2	4.02046	18.1148	11.7876	0.0504538	0.00278523	297	55	0.223964	291	0.769637	0.0424867
ENST00000225665.12	chr17	84	-1	1647	912	130	605	SLC25A11	TGA	TGAA	116.909	114.894	1.9037	0.111982	1044	1026	17	1	70.9833	125.98	14.6438	0.185095	0.00146924	183	6	0	177	0	0
ENST00000394505.6	chr7	382	-1	3098	2178	548	372	KRIT1	TGA	TGAA	40.2016	30.9071	8.95858	0.335947	359	276	80	3	12.9766	14.1906	16.3478	0.903083	0.0636396	39	7	0.335947	33	10.1802	0.717391
ENST00000357242.10	chrX	476	1	5684	3330	175	2179	TBC1D8B	TAA	TAAA	26.4278	26.0919	0.335947	0	236	233	3	0	4.64951	7.83539	1.9197	0	0	24	50	0	18	0	0
ENST00000377208.7	chr13	206	-1	4494	1227	220	3047	POU4F1	TGA	TGAG	14.6697	8.06272	6.49497	0.111982	131	72	58	1	3.26428	6.57109	29.5226	0.0367516	0.00559293	228	46	0	222	0	0
ENST00000249601.8	chr10	192	-1	2706	2064	291	351	ARHGAP22	TAA	TAAA	3.58343	3.02352	0.447929	0.111982	32	27	4	1	1.32425	1.46488	1.53927	0.319038	0.21779	339	1	0.111982	333	0.336283	0.229563
ENST00000224862.7	chr10	513	1	2317	870	1310	137	FBXL15	TGA	TGAC	9.96642	7.83876	2.12766	0	89	70	19	0	4.30143	9.01007	1.62417	0	0	60	2	0	54	0	0
ENST00000297161.6	chr7	172	1	4986	2025	368	2593	BMPER	TGA	TGAC	4.25533	4.14334	0.111982	0	38	37	1	0	0.853455	2.0461	0.3043	0	0	27	56	0	21	0	0
ENST00000264694.13	chr4	676	1	3157	2490	183	484	SNX25	TGA	TGAG	6.04704	6.04704	0	0	54	54	0	0	1.91544	2.42853	0	0	0	81	12	0	75	0	0
ENST00000376473.9	chr6	196	1	1357	915	153	289	C6orf136	TGA	TGAT	8.62263	8.62263	0	0	77	77	0	0	6.35419	9.42364	0	0	0	30	6	0	24	0	0
ENST00000380814.4	chr13	57	-1	2076	1359	493	224	SLC46A3	TAA	TAAG	5.48713	5.0392	0.447929	0	49	45	4	0	2.64313	3.70802	0.908578	0	0	54	5	0	48	0	0
ENST00000372281.8	chr10	340	1	1996	339	29	1628	TMEM254	TGA	TGAA	9.40651	8.95858	0	0.447929	84	80	0	4	4.71268	26.4265	0	0.275141	0.0104115	198	22	0.335947	192	1.74972	0.0662109
ENST00000357847.8	chr6	805	1	1350	684	44	622	AIG1	TGA	TGAG	55.5432	55.2072	0	0.335947	496	493	0	3	41.1431	80.7124	0	0.540107	0.00669176	42	13	0.111982	36	3.11062	0.0385396
ENST00000420616.6	chr12	86	1	2432	1887	512	33	PEX5	TGA	TGAC	33.9306	33.1467	0.783876	0	303	296	7	0	13.9517	17.5658	1.53101	0	0	33	0	0	27	0	0
ENST00000393600.8	chrX	748	1	1292	987	89	216	FAM50A	TGA	TGAG	98.5444	96.4167	1.9037	0.223964	880	861	17	2	76.2727	97.6866	21.3899	1.03687	0.0106143	216	0	0.223964	210	1.0665	0.0109175
ENST00000397912.3	chr7	508	1	2114	522	43	1549	PRKRIP1	TGA	TGAC	12.878	12.542	0.335947	0	115	112	3	0	6.09175	24.0268	7.81272	0	0	45	21	0	39	0	0
ENST00000375527.2	chr6	253	-1	1830	1347	170	313	ZBTB12	TAG	TAGC	12.878	12.654	0.223964	0	115	113	2	0	7.03714	9.3942	1.31744	0	0	120	4	0	114	0	0
ENST00000371217.10	chr10	428	-1	2473	1791	22	660	TCTN3	TGA	TGAA	55.7672	55.6552	0.111982	0	498	497	1	0	22.5504	31.0749	5.0901	0	0	69	14	0	63	0	0
ENST00000242848.8	chr13	134	-1	7973	4974	343	2656	ZC3H13	TAA	TAAG	88.8019	85.8904	2.79956	0.111982	793	767	25	1	11.1378	17.2679	8.16197	0.042162	0.00244164	78	57	0	72	0	0
ENST00000316939.3	chr19	359	-1	1724	636	5	1083	GADD45GIP1	TGA	TGAG	130.571	130.011	0	0.559911	1166	1161	0	5	75.7374	204.42	0	0.517	0.0025291	21	11	0.223964	15	14.931	0.0730405
ENST00000375537.8	chr6	252	-1	3920	3600	1	319	EHMT2	TGA	TGAG	92.9453	92.8333	0	0.111982	830	829	0	1	23.7105	25.787	0	0.351042	0.0136131	132	5	0.111982	126	0.888748	0.0344649
ENST00000334801.7	chr11	1002	-1	9960	4467	959	4534	BCL9L	TAG	TAGA	7.39083	7.39083	0	0	66	66	0	0	0.742051	1.65454	0	0	0	129	48	0	123	0	0
ENST00000396675.7	chr7	68	-1	2088	1419	61	608	ICA1	TGA	TGAA	1.67973	1.67973	0	0	15	15	0	0	0.80447	1.18374	0	0	0	75	7	0	69	0	0
ENST00000202017.6	chr20	169	-1	1912	369	79	1464	PDRG1	TGA	TGAG	27.9956	27.5476	0.111982	0.335947	250	246	1	3	14.642	74.6548	1.4175	0.229472	0.00307377	129	25	0	123	0	0
ENST00000346416.7	chr20	187	-1	2035	1731	106	198	CDK5RAP1	TGA	TGAC	54.0874	53.1916	0.783876	0.111982	483	475	7	1	26.5786	30.7288	7.39505	0.565567	0.0184051	150	4	0.111982	144	0.777655	0.025307
ENST00000439028.3	chr19	283	-1	2146	1164	120	862	S1PR5	TGA	TGAC	2.35163	2.35163	0	0	21	21	0	0	1.09582	2.0203	0	0	0	141	17	0	135	0	0
ENST00000310015.11	chr2	770	-1	12000	2313	525	9162	SP3	TAA	TAAA	72.1166	68.7571	2.91154	0.447929	644	614	26	4	6.00971	29.7264	5.54579	0.0488899	0.00164466	45	226	0.111982	39	2.87134	0.0965923
ENST00000544898.5	chr16	530	-1	3396	765	48	2583	TK2	TAG	TAGG	3.35947	3.02352	0.223964	0.111982	30	27	2	1	0.989242	3.95231	4.66593	0.0433536	0.0109692	54	36	0.111982	48	2.33296	0.590278
ENST00000321341.11	chr18	159	1	8986	1722	197	7067	ME2	TAG	TAGA	88.6899	87.1222	1.2318	0.335947	792	778	11	3	9.86979	50.5936	6.25282	0.0475374	0.000939593	66	127	0.111982	60	1.86637	0.0368895
ENST00000249806.11	chr15	303	-1	2183	903	138	1142	CLN6	TGA	TGAG	49.6081	44.345	4.47929	0.783876	443	396	40	7	22.7248	49.1085	32.4586	0.686406	0.0139773	93	12	0.223964	87	2.5743	0.0524208
ENST00000013125.8	chr14	200	-1	4309	2508	313	1488	MAP4K5	TAA	TAAG	32.9228	32.1389	0.559911	0.223964	294	287	5	2	7.64047	12.8146	1.78885	0.150514	0.0117455	24	32	0.223964	18	12.4425	0.970964
ENST00000293406.7	chr17	622	-1	2263	555	142	1566	LSM12	TGA	TGAG	38.5219	37.738	0.111982	0.671893	344	337	1	6	17.0225	67.9964	0.788607	0.429051	0.0063099	189	16	0.111982	183	0.611925	0.00899937
ENST00000219473.11	chr16	702	1	2964	2364	107	493	USP10	TAA	TAAA	117.021	114.222	2.68757	0.111982	1045	1020	24	1	39.4809	48.3172	25.1175	0.227145	0.00470111	42	12	0.111982	36	3.11062	0.0643791
ENST00000232375.8	chr3	262	-1	3454	1377	20	2057	PFKFB4	TGA	TGAC	3.47145	3.35947	0	0.111982	31	30	0	1	1.00505	2.4397	0	0.0544396	0.022314	213	14	0	207	0	0
ENST00000319725.10	chr9	564	1	3108	1686	98	1324	FUBP3	TAG	TAGG	97.0886	95.4089	1.2318	0.447929	867	852	11	4	31.2383	56.5889	12.5694	0.338315	0.00597847	117	32	0.335947	111	3.02655	0.0534831
ENST00000366899.4	chr1	1696	-1	2544	1416	146	982	DUSP10	TGA	TGAC	3.91938	3.1355	0.783876	0	35	28	7	0	1.54064	2.21434	5.36901	0	0	48	14	0	42	0	0
ENST00000374843.9	chr6	287	-1	1048	753	55	240	HLA-DMA	TGA	TGAT	2.35163	2.23964	0	0.111982	21	20	0	1	2.24392	2.9743	0	0.466593	0.156875	21	1	0	15	0	0
ENST00000405442.5	chr22	205	-1	1806	1614	110	82	EIF3D	TAA	TAAA	455.992	455.32	0.335947	0.335947	4072	4066	3	3	252.487	282.106	3.05406	4.09691	0.0145226	78	1	0.335947	72	4.66593	0.0165396
ENST00000307712.11	chr14	169	-1	3798	2265	219	1314	SEC23A	TGA	TGAA	191.154	187.234	3.35947	0.559911	1707	1672	30	5	50.3301	82.6642	15.34	0.426112	0.00515474	27	29	0.223964	21	10.665	0.129016
ENST00000269195.5	chr18	114	1	3802	1647	97	2058	GALNT1	TGA	TGAG	70.6608	68.8691	0.783876	1.00784	631	615	7	9	18.5852	41.8149	8.08119	0.489718	0.0117116	153	43	0.223964	147	1.52357	0.036436
ENST00000344908.9	chr2	610	-1	2090	1827	94	169	MAP3K2	TAG	TAGC	14.1098	14.1098	0	0	126	126	0	0	6.75108	7.72291	0	0	0	169	0	0	163	0	0
ENST00000368199.7	chr1	1250	-1	1613	1137	148	328	SH2D2A	TAG	TAGG	10.6383	10.6383	0	0	95	95	0	0	6.59536	9.35648	0	0	0	72	4	0	66	0	0
ENST00000379179.8	chr13	122	1	757	165	196	396	SERP2	TGA	TGAG	0.223964	0.223964	0	0	2	2	0	0	0.295858	1.35736	0	0	0	102	5	0	96	0	0
ENST00000566866.5	chr16	326	1	2941	2709	154	78	EIF3C	TGA	TGAG	595.858	592.498	3.02352	0.335947	5321	5291	27	3	202.604	218.715	19.6333	4.30701	0.0196924	48	1	0.111982	42	2.66624	0.0121905
ENST00000303577.6	chr2	321	1	1705	1038	284	383	PCBP1	TAG	TAGA	410.415	379.284	29.2274	1.9037	3665	3387	260	17	240.713	365.399	102.913	4.97049	0.0136029	60	9	1.34379	54	24.8849	0.0681035
ENST00000369085.7	chr10	607	1	2526	1695	300	531	BAG3	TAG	TAGC	77.6037	72.9004	4.47929	0.223964	693	651	40	2	30.722	43.0091	14.931	0.421779	0.00980673	45	13	0.223964	39	5.74268	0.133522
ENST00000316052.6	chr8	578	1	797	705	51	41	EXOSC4	TGA	TGAC	66.2935	65.9575	0.111982	0.223964	592	589	1	2	83.1788	93.5568	2.19573	5.46255	0.0583875	27	1	0.223964	21	10.665	0.113995
ENST00000300870.15	chr16	422	1	3223	2199	154	870	ZNF267	TAA	TAAA	20.8287	19.9328	0.895858	0	186	178	8	0	6.46252	9.0645	5.81726	0	0	93	17	0	87	0	0
ENST00000441582.2	chr3	710	1	3617	3555	44	18	ZBTB38	TGA	TGAG	16.9093	16.9093	0	0	151	151	0	0	4.67496	4.75649	0	0	0	18	0	0	12	0	0
ENST00000542447.6	chr11	965	-1	4178	1212	123	2843	CADM1	TAG	TAGA	88.018	87.6821	0	0.335947	786	783	0	3	21.067	72.345	0	0.118166	0.00163337	45	37	0.111982	39	2.87134	0.0396896
ENST00000263735.8	chr2	238	1	1679	912	352	415	EPCAM	TAA	TAAC	1.34379	1.34379	0	0	12	12	0	0	0.80035	1.47345	0	0	0	36	10	0	30	0	0
ENST00000244096.7	chrX	691	-1	2696	1077	427	1192	MAGEA10	TAA	TAAA	1.9037	1.56775	0.335947	0	17	14	3	0	0.70612	1.45567	0.786761	0	0	75	15	0	69	0	0
ENST00000370801.8	chr1	750	-1	6367	2679	470	3218	AC118549.1	TGA	TGAC	57.8948	45.8007	11.5342	0.559911	517	409	103	5	9.09295	17.0962	24.5408	0.173994	0.0101773	42	71	0.223964	36	6.22124	0.363896
ENST00000344824.10	chr19	424	1	1372	822	112	438	TPM4	TAA	TAAG	29.5633	29.0034	0	0.559911	264	259	0	5	21.5476	35.2839	0	1.27834	0.03623	132	5	0.335947	126	2.66624	0.0755654
ENST00000359595.7	chr15	458	-1	1935	1050	209	676	HAPLN3	TAG	TAGG	9.29453	8.1747	1.11982	0	83	73	10	0	4.80337	7.78543	5.358	0	0	51	7	0	45	0	0
ENST00000368809.1	chr1	1100	-1	571	261	71	239	S100A10	TAG	TAGG	147.481	143.897	3.02352	0.559911	1317	1285	27	5	258.285	551.33	42.5848	2.34272	0.00424922	84	3	0.447929	78	5.74268	0.010416
ENST00000595790.5	chr19	1043	-1	1180	663	352	165	FAM71E1	TAA	TAAG	2.79956	1.00784	1.67973	0.111982	25	9	15	1	2.37251	1.52012	4.77197	0.67868	0.446465	60	2	0	54	0	0
ENST00000341084.7	chr8	422	-1	4141	2484	174	1483	RNF19A	TAG	TAGG	15.2296	13.6618	1.56775	0	136	122	14	0	3.67776	5.49993	9.01007	0	0	75	36	0	69	0	0
ENST00000341105.6	chr3	631	-1	3322	1410	326	1586	GATA2	TAG	TAGG	15.0056	14.6697	0.335947	0	134	131	3	0	4.51704	10.404	1.03051	0	0	57	15	0	51	0	0
ENST00000360652.7	chr20	38	-1	1934	1332	460	142	PCED1A	TAG	TAGA	4.70325	2.91154	1.79172	0	42	26	16	0	2.43188	2.18584	3.89503	0	0	123	2	0	117	0	0
ENST00000272444.7	chr2	356	-1	1608	1101	36	471	DUSP11	TGA	TGAT	55.7672	55.5432	0	0.223964	498	496	0	2	34.6811	50.448	0	0.475508	0.00942572	72	10	0.111982	66	1.6967	0.0336327
ENST00000405460.9	chr5	290	1	19512	18888	93	531	ADGRV1	TAG	TAGC	20.1568	20.1568	0	0	180	180	0	0	1.03305	1.06718	0	0	0	99	10	0	93	0	0
ENST00000366932.4	chr1	1682	1	7720	816	18	6886	RRP15	TAA	TAAA	110.974	109.967	0	1.00784	991	982	0	9	14.3749	134.763	0	0.146361	0.00108606	63	158	0.335947	57	5.8938	0.0437346
ENST00000380051.6	chr6	25	-1	1438	1059	39	340	RPP40	TAA	TAAA	52.8556	52.8556	0	0	472	472	0	0	36.7563	49.9109	0	0	0	195	2	0	189	0	0
ENST00000293261.8	chr19	954	-1	2218	1347	14	857	TMEM143	TGA	TGAG	7.39083	7.39083	0	0	66	66	0	0	3.3322	5.48688	0	0	0	42	13	0	36	0	0
ENST00000267205.7	chr12	861	-1	2390	603	49	1738	RHOF	TGA	TGAC	2.35163	2.01568	0.111982	0.223964	21	18	1	2	0.983944	3.34275	2.28535	0.128863	0.0385501	120	16	0	114	0	0
ENST00000341446.9	chr12	909	1	6658	723	140	5795	BRI3BP	TGA	TGAA	29.1154	25.42	1.11982	2.57559	260	227	10	23	4.37299	35.159	7.99873	0.444451	0.0126412	93	99	1.56775	87	18.0201	0.512532
ENST00000396987.7	chr8	217	1	6253	1338	921	3994	GPAT4	TGA	TGAG	45.3528	22.5084	22.5084	0.335947	405	201	201	3	7.25297	16.8224	24.4391	0.0841129	0.00500004	276	44	0.223964	270	0.829498	0.049309
ENST00000615008.4	chr20	66	-1	549	351	175	23	TMEM230	TGA	TGAG	6.9429	5.93506	1.00784	0	62	53	9	0	12.6464	16.909	5.75909	0	0	23	0	0	17	0	0
ENST00000300107.7	chr15	276	-1	4650	1869	183	2598	CLPX	TAA	TAAA	74.3562	67.4133	6.71893	0.223964	664	602	60	2	15.9906	36.0692	36.7155	0.0862065	0.00239003	57	60	0.111982	51	2.19573	0.0608755
ENST00000395633.5	chr19	39	1	659	474	99	86	ATP5F1D	TAG	TAGG	146.473	140.986	4.47929	1.00784	1308	1259	40	9	222.265	297.438	45.2454	11.7191	0.0394	86	0	1.00784	80	12.598	0.042355
ENST00000409299.8	chr20	194	-1	5645	606	97	4942	PXMP4	TAA	TAAT	5.82308	5.71109	0.111982	0	52	51	1	0	1.03155	9.42425	1.15446	0	0	84	77	0	78	0	0
ENST00000357164.3	chr5	593	1	3851	549	319	2983	GM2A	TAA	TAAC	59.2386	57.8948	1.11982	0.223964	529	517	10	2	15.3827	105.455	3.51042	0.0750803	0.000711965	189	35	0.111982	183	0.611925	0.00580271
ENST00000356891.4	chr12	635	1	2784	945	107	1732	C12orf29	TAA	TAAA	66.9654	64.2778	1.9037	0.783876	598	574	17	7	24.0537	68.0188	17.7916	0.452584	0.00665381	117	40	0.671893	111	6.05309	0.0889914
ENST00000339994.4	chr11	220	-1	2756	1140	562	1054	KCNJ11	TGA	TGAG	1.67973	1.34379	0.335947	0	15	12	3	0	0.609482	1.17876	0.59777	0	0	279	12	0	273	0	0
ENST00000549920.6	chr19	963	-1	598	534	29	35	RPL18	TAA	TAAC	967.975	936.955	29.8993	1.11982	8643	8366	266	10	1618.69	1754.6	1031.01	31.9949	0.0182349	24	2	0.895858	18	49.7699	0.0283654
ENST00000617138.4	chr11	338	1	590	426	99	65	MDK	TAA	TAAG	18.925	18.2531	0.671893	0	169	163	6	0	32.0763	42.8477	6.7868	0	0	21	1	0	15	0	0
ENST00000343028.9	chr12	227	-1	4270	1680	210	2380	TM7SF3	TAG	TAGA	44.121	41.7694	2.35163	0	394	373	21	0	10.3328	24.8627	11.1982	0	0	165	44	0	159	0	0
ENST00000575771.5	chr17	168	-1	807	345	422	40	NAA38	TGA	TGAC	91.6015	81.4111	9.63047	0.559911	818	727	86	5	113.509	235.974	22.821	13.9978	0.0593191	33	1	0.559911	27	20.7375	0.0878802
ENST00000398250.5	chr10	611	1	1476	783	346	347	PLPP4	TGA	TGAC	1.2318	1.2318	0	0	11	11	0	0	0.834556	1.57319	0	0	0	27	7	0	21	0	0
ENST00000619836.4	chr1	320	1	4207	993	267	2947	PDIK1L	TGA	TGAC	6.60695	5.82308	0.783876	0	59	52	7	0	1.57047	5.86413	2.93586	0	0	72	61	0	66	0	0
ENST00000379143.10	chr20	67	-1	1231	753	154	324	PCNA	TAG	TAGG	573.685	521.501	48.4883	3.69541	5123	4657	433	33	466.032	692.565	314.859	11.4056	0.0164686	135	6	3.24749	129	25.1743	0.0363494
ENST00000291358.10	chr1	407	1	1982	1368	15	599	IQCC	TAG	TAGA	5.15118	5.15118	0	0	46	46	0	0	2.59898	3.76548	0	0	0	48	9	0	42	0	0
ENST00000457855.1	chr3	25	1	4263	3612	5	646	BRPF1	TGA	TGAT	24.8601	24.5241	0.223964	0.111982	222	219	2	1	5.83159	6.78962	44.7929	0.173347	0.0255312	27	4	0.111982	21	5.33249	0.785388
ENST00000359237.9	chrX	603	-1	1074	606	268	200	PLAC1	TGA	TGAT	10.3024	9.51849	0.783876	0	92	85	7	0	9.59252	15.7071	2.92491	0	0	51	6	0	45	0	0
ENST00000505788.5	chr4	323	1	2034	1266	89	679	2020-09-11	TAA	TAAA	173.461	172.677	0.783876	0	1549	1542	7	0	85.2805	136.395	8.80759	0	0	120	8	0	114	0	0
ENST00000355354.13	chr3	497	-1	5183	885	111	4187	CD47	TGA	TGAA	57.1109	56.3271	0.783876	0	510	503	7	0	11.0189	63.6464	7.06194	0	0	42	87	0	36	0	0
ENST00000339241.1	chr4	503	1	2303	927	181	1195	SPRY1	TGA	TGAT	5.15118	2.57559	2.12766	0.447929	46	23	19	4	2.23673	2.77842	11.755	0.374836	0.13491	27	20	0	21	0	0
ENST00000319285.4	chr16	376	-1	1177	480	89	608	DCTPP1	TAG	TAGA	142.441	139.53	2.01568	0.895858	1272	1246	18	8	121.021	290.687	22.6481	1.47345	0.00506885	78	6	0.223964	72	3.11062	0.0107009
ENST00000431156.6	chr8	177	-1	2318	1494	613	211	TTI2	TAA	TAAG	21.9485	21.1646	0.671893	0.111982	196	189	6	1	9.46873	14.1664	1.09607	0.530722	0.0374633	211	0	0.111982	205	0.546255	0.0385598
ENST00000357362.7	chr14	185	-1	2920	2151	629	140	MDGA2	TGA	TGAC	3.8074	2.91154	0.895858	0	34	26	8	0	1.3039	1.35357	1.42426	0	0	75	3	0	69	0	0
ENST00000344920.9	chr5	130	1	6376	3228	162	2986	NNT	TAA	TAAA	114.782	113.326	1.34379	0.111982	1025	1012	12	1	18.0022	35.1072	8.29498	0.0375024	0.00106823	63	80	0.111982	57	1.9646	0.0559601
ENST00000395663.1	chr20	410	-1	652	123	35	494	ATP5F1E	TAA	TAAT	222.285	207.055	15.1176	0.111982	1984	1848	134	1	340.928	1683.38	431.932	0.226685	0.000134661	39	12	0.111982	33	3.3934	0.00201583
ENST00000305963.2	chrX	629	-1	3693	363	382	2948	MMGT1	TAA	TAAG	80.5152	60.1345	19.3729	1.00784	719	537	173	9	21.8021	165.66	50.7145	0.341873	0.0020637	18	61	0	12	0	0
ENST00000321560.4	chr17	249	-1	2533	726	41	1766	PLD6	TAA	TAAC	12.542	12.318	0	0.223964	112	110	0	2	4.95145	16.967	0	0.12682	0.00747452	87	24	0.223964	81	2.76499	0.162963
ENST00000633531.1	chr7	406	-1	1608	1032	115	461	PON2	TAA	TAAA	25.42	23.8522	1.00784	0.559911	227	213	9	5	15.8084	23.1126	8.76383	1.21456	0.0525496	18	11	0.223964	12	18.6637	0.807512
ENST00000399464.7	chr17	136	-1	5162	4656	17	489	NEURL4	TGA	TGAG	29.7873	29.6753	0.111982	0	266	265	1	0	5.77049	6.37356	6.58719	0	0	258	4	0	252	0	0
ENST00000409523.1	chr2	588	-1	702	348	332	22	C2orf76	TGA	TGAA	13.5499	13.2139	0.223964	0.111982	121	118	2	1	19.3018	37.971	0.674592	5.0901	0.134052	22	0	0.111982	16	6.99889	0.184322
ENST00000525158.1	chr11	418	-1	485	240	175	70	TIMM10	TGA	TGAG	59.5746	44.7929	14.7817	0	532	400	132	0	122.834	186.637	84.4666	0	0	51	2	0	45	0	0
ENST00000299163.7	chr10	483	1	12882	1017	10	11855	HIF1AN	TAG	TAGC	39.6417	39.4178	0.111982	0.111982	354	352	1	1	3.0773	38.7589	11.1982	0.00944599	0.000243712	87	201	0	81	0	0
ENST00000372879.8	chr7	108	-1	469	345	6	118	TOMM7	TAA	TAAG	169.429	164.39	0	5.0392	1513	1468	0	45	361.256	476.493	0	42.7051	0.0896238	63	4	2.35163	57	41.2566	0.086584
ENST00000266674.10	chr12	591	1	4538	2691	277	1570	LGR5	TAA	TAAT	8.39867	7.83876	0.447929	0.111982	75	70	4	1	1.85074	2.91295	1.61707	0.0713263	0.0244859	42	34	0	36	0	0
ENST00000167462.9	chr17	928	1	3435	3015	124	296	LLGL2	TGA	TGAG	5.59911	5.48713	0.111982	0	50	49	1	0	1.63002	1.81994	0.903083	0	0	249	4	0	243	0	0
ENST00000636580.1	chrX	147	1	2292	1020	185	1087	ATP6AP2	TGA	TGAA	181.075	174.356	4.25533	2.46361	1617	1557	38	22	79.0032	170.938	23.0018	2.26643	0.0132588	54	26	1.11982	48	23.3296	0.13648
ENST00000381334.10	chr4	214	1	1886	942	227	717	TMEM165	TAA	TAAC	43.4491	37.738	5.59911	0.111982	388	337	50	1	23.0377	40.0616	24.6657	0.156182	0.00389854	36	19	0.111982	30	3.73274	0.0931751
ENST00000373255.9	chr10	267	1	1887	1086	208	593	H2AFY2	TAG	TAGC	60.2464	47.3685	12.878	0	538	423	115	0	31.9271	43.6174	61.9133	0	0	66	9	0	60	0	0
ENST00000290921.10	chr4	21	-1	2252	1290	176	786	CTBP1	TAG	TAGC	28.8914	27.7716	0.783876	0.335947	258	248	7	3	12.8292	21.5284	4.45384	0.427413	0.0198535	231	8	0	225	0	0
ENST00000524737.5	chr11	1087	1	1754	1398	205	151	CHEK1	TGA	TGAT	91.2655	89.9217	1.2318	0.111982	815	803	11	1	52.0328	64.3217	6.0088	0.741604	0.0115296	75	3	0	69	0	0
ENST00000543872.6	chr17	792	1	3432	2943	258	231	SMG8	TAA	TAAG	76.7078	76.7078	0	0	685	685	0	0	22.3508	26.0645	0	0	0	141	1	0	135	0	0
ENST00000349721.8	chr9	9	1	5703	4740	88	875	SMARCA2	TGA	TGAT	48.4883	47.5925	0.671893	0.223964	433	425	6	2	8.50225	10.0406	7.63515	0.255959	0.0254924	84	16	0.111982	78	1.43567	0.142986
ENST00000366773.8	chr6	916	1	2115	2004	30	81	ERMARD	TGA	TGAA	18.925	18.925	0	0	169	169	0	0	8.94799	9.44361	0	0	0	42	2	0	36	0	0
ENST00000380989.6	chr10	10	-1	3442	3084	63	295	PITRM1	TGA	TGAG	134.267	134.155	0	0.111982	1199	1198	0	1	39.0083	43.5002	0	0.379601	0.00872641	54	8	0.111982	48	2.33296	0.0536311
ENST00000281273.8	chr3	539	1	3978	1215	251	2512	QTRT2	TGA	TGAG	84.0987	74.9161	8.51065	0.671893	751	669	76	6	21.1409	61.6594	33.907	0.267474	0.00433792	54	55	0.335947	48	6.99889	0.113509
ENST00000356924.9	chr14	357	-1	2990	1788	16	1186	ABCD4	TGA	TGAA	18.4771	18.4771	0	0	165	165	0	0	6.17962	10.3339	0	0	0	159	20	0	153	0	0
ENST00000324932.12	chr11	81	-1	6681	5370	177	1134	NUP98	TGA	TGAG	260.023	259.239	0.671893	0.111982	2322	2315	6	1	38.9197	48.2754	3.79601	0.0987498	0.00204555	183	16	0	177	0	0
ENST00000534548.6	chr11	1126	-1	5016	4464	59	493	NCAPD3	TAA	TAAA	252.968	252.856	0.111982	0	2259	2258	1	0	50.4322	56.6434	1.898	0	0	42	9	0	36	0	0
ENST00000378827.5	chr20	75	1	3500	1158	1191	1151	BMP2	TAG	TAGT	17.6932	7.83876	9.85444	0	158	70	88	0	5.0552	6.76922	8.27409	0	0	159	18	0	153	0	0
ENST00000256151.8	chr12	624	-1	1540	693	5	842	CCDC59	TAA	TAAA	54.6473	54.5354	0	0.111982	488	487	0	1	35.4853	78.6946	0	0.132996	0.00169002	78	13	0	72	0	0
ENST00000369888.6	chr20	468	-1	5937	2646	113	3178	ZNF512B	TGA	TGAG	24.5241	24.3001	0	0.223964	219	217	0	2	4.13072	9.18373	0	0.0704734	0.00767372	237	20	0	231	0	0
ENST00000610140.6	chr7	169	-1	1622	963	65	594	NT5C3A	TAA	TAAA	44.121	42.8892	1.11982	0.111982	394	383	10	1	27.2016	44.5371	17.228	0.188522	0.00423293	69	20	0	63	0	0
ENST00000392476.6	chr17	967	1	2912	2127	553	232	SEC14L1	TGA	TGAC	44.7929	39.3058	5.37515	0.111982	400	351	48	1	15.3822	18.4794	9.71998	0.482682	0.02612	57	4	0	51	0	0
ENST00000244137.12	chr19	581	-1	1862	1449	25	388	PEPD	TAG	TAGA	78.6115	78.3876	0	0.223964	702	700	0	2	42.2189	54.0977	0	0.577228	0.0106701	57	8	0	51	0	0
ENST00000299299.4	chr10	279	-1	742	282	26	434	PCBD1	TAG	TAGA	46.3607	46.0247	0.111982	0.223964	414	411	1	2	62.4807	163.208	4.30701	0.516047	0.0031619	42	6	0	36	0	0
ENST00000327787.13	chr17	1013	-1	3552	2613	17	922	FAAP100	TGA	TGAC	15.7895	15.5655	0	0.223964	141	139	0	2	4.44524	5.95696	0	0.242912	0.0407778	117	7	0.111982	111	1.00885	0.169356
ENST00000537561.5	chr3	656	1	5898	447	69	5382	NUDT16	TGA	TGAT	11.5342	11.5342	0	0	103	103	0	0	1.95561	25.8035	0	0	0	237	98	0	231	0	0
ENST00000340258.10	chr10	162	1	3586	933	97	2556	RASSF4	TAA	TAAC	1.9037	1.2318	0.559911	0.111982	17	11	5	1	0.53087	1.32026	5.77228	0.0438115	0.033184	90	21	0	84	0	0
ENST00000349004.6	chr20	234	-1	2926	1095	88	1743	NDRG3	TAA	TAAG	73.1244	70.5488	2.46361	0.111982	653	630	22	1	24.9913	64.4281	27.9956	0.0642468	0.000997186	57	26	0.111982	51	2.19573	0.0340803
ENST00000587250.4	chr17	603	1	4117	651	111	3355	RND2	TGA	TGAG	11.8701	10.9743	0.895858	0	106	98	8	0	2.8832	16.8575	8.07079	0	0	78	48	0	72	0	0
ENST00000246535.4	chr19	587	1	1112	1044	26	42	PDCD2L	TAG	TAGA	36.0583	35.9463	0	0.111982	322	321	0	1	32.4265	34.4313	0	2.66624	0.0774366	18	1	0	12	0	0
ENST00000611074.4	chr19	277	-1	3541	2238	74	1229	RAVER1	TAA	TAAG	123.068	122.509	0	0.559911	1099	1094	0	5	34.7553	54.7402	0	0.455583	0.00832264	132	11	0.111982	126	0.888748	0.0162357
ENST00000273854.7	chr4	236	-1	8221	3081	595	4545	EPHA5	TAA	TAAC	5.82308	4.03136	1.79172	0	52	36	16	0	0.708317	1.30846	3.01129	0	0	33	114	0	27	0	0
ENST00000578186.2	chr1	1035	1	538	279	20	239	HIST2H4A	TAG	TAGG	2133.49	2125.2	7.27885	1.00784	19051	18977	65	9	3965.59	7617.2	363.942	4.2169	0.000553603	69	3	1.00784	63	15.9975	0.00210018
ENST00000269097.8	chr17	623	1	1488	1008	225	255	G6PC3	TGA	TGAC	64.6138	59.2386	4.92722	0.447929	577	529	44	4	43.4232	58.7685	21.8988	1.75658	0.0298899	96	2	0.447929	90	4.97699	0.0846881
ENST00000469144.5	chr19	42	1	623	366	228	29	C19orf24	TAA	TAAA	8.8466	0.783876	8.06272	0	79	7	72	0	14.2	2.14174	35.3628	0	0	30	1	0	24	0	0
ENST00000366728.6	chr1	1743	1	797	693	7	97	GUK1	TGA	TGAC	18.1411	18.1411	0	0	162	162	0	0	22.7618	26.1777	0	0	0	63	2	0	57	0	0
ENST00000356436.8	chr6	61	-1	1071	849	78	144	TBC1D7	TGA	TGAA	28.7794	27.9956	0.783876	0	257	250	7	0	26.8716	32.9747	10.0497	0	0	78	2	0	72	0	0
ENST00000272227.7	chr2	39	-1	2293	1290	142	861	PDIA6	TGA	TGAG	446.585	442.442	2.79956	1.34379	3988	3951	25	12	194.76	342.978	19.7152	1.56073	0.00455052	90	18	0.671893	84	7.99873	0.0233214
ENST00000264914.10	chr5	251	-1	4807	1569	56	3182	ARSB	TAG	TAGG	9.29453	8.95858	0	0.335947	83	80	0	3	1.93354	5.70974	0	0.105577	0.0184907	150	53	0	144	0	0
ENST00000370992.8	chr10	444	-1	4380	3861	133	386	RRP12	TGA	TGAG	100.112	97.8725	2.12766	0.111982	894	874	19	1	22.8567	25.349	15.9975	0.290109	0.0114446	126	5	0	120	0	0
ENST00000316731.12	chr7	61	-1	2840	1416	567	857	CCZ1B	TGA	TGAC	46.4726	46.0247	0.447929	0	415	411	4	0	16.3636	32.5033	0.789998	0	0	30	16	0	24	0	0
ENST00000263655.3	chr2	303	-1	1908	462	600	846	CNRIP1	TGA	TGAA	6.15902	3.24749	2.91154	0	55	29	26	0	3.228	7.02919	4.85256	0	0	126	20	0	120	0	0
ENST00000302362.11	chr17	362	-1	823	522	39	262	COPRS	TGA	TGAG	39.4178	39.0818	0.111982	0.223964	352	349	1	2	47.8952	74.8694	2.87134	0.854826	0.0114176	84	4	0.223964	78	2.87134	0.0383513
ENST00000649463.1	chr10	320	1	7863	6189	505	1169	KAT6B	TAG	TAGA	26.5398	23.8522	2.68757	0	237	213	24	0	3.37528	3.85397	5.32193	0	0	48	16	0	42	0	0
ENST00000567468.5	chr16	287	-1	1668	639	7	1022	GGA2	TAA	TAAT	24.4121	24.4121	0	0	218	218	0	0	14.6356	38.2036	0	0	0	24	16	0	18	0	0
ENST00000373247.6	chr9	508	1	2234	1731	44	459	FPGS	TAG	TAGC	34.0426	34.0426	0	0	304	304	0	0	15.2384	19.6664	0	0	0	57	4	0	51	0	0
ENST00000401642.8	chr4	205	-1	3117	2022	114	981	SCFD2	TGA	TGAG	46.9206	44.7929	1.9037	0.223964	419	400	17	2	15.0531	22.1528	16.6991	0.228302	0.0103058	138	18	0.223964	132	1.6967	0.0765909
ENST00000334310.10	chr11	200	1	3030	1041	152	1837	TEAD1	TGA	TGAA	21.1646	20.2688	0.783876	0.111982	189	181	7	1	6.98503	19.4705	5.15708	0.0609593	0.00313086	87	48	0	81	0	0
ENST00000350777.6	chr11	1015	1	3118	1521	57	1540	HINFP	TGA	TGAA	10.8623	10.3024	0.559911	0	97	92	5	0	3.48373	6.77342	9.823	0	0	45	27	0	39	0	0
ENST00000332439.5	chr17	169	1	3444	654	126	2664	CYB5D1	TAG	TAGG	14.8936	12.318	2.46361	0.111982	133	110	22	1	4.32452	18.8349	19.5525	0.0420354	0.00223178	24	41	0	18	0	0
ENST00000453384.7	chr17	326	-1	1054	774	-5	285	RAB34	TGA	TGAC	25.7559	12.878	12.878	0	230	115	115	0	24.4364	16.6382	-2575.59	0	0	75	5	0	69	0	0
ENST00000370268.8	chrX	704	1	4260	2037	31	2192	ZNF185	TAG	TAGC	2.91154	2.91154	0	0	26	26	0	0	0.68346	1.42933	0	0	0	33	36	0	27	0	0
ENST00000370775.2	chrX	610	-1	1199	309	61	829	RTL8A	TAG	TAGG	53.6395	46.4726	0.783876	6.38299	479	415	7	57	44.7369	150.397	12.8504	7.69962	0.0511954	69	5	0	63	0	0
ENST00000546500.5	chr12	432	1	4076	930	609	2537	HNRNPA1	TAA	TAAT	1303.92	1287.57	12.654	3.69541	11643	11497	113	33	319.902	1384.49	20.7783	1.45661	0.00105209	18	59	0	12	0	0
ENST00000358290.9	chr4	368	-1	1737	870	112	755	HSD17B11	TAA	TAAG	75.1401	70.7728	4.14334	0.223964	671	632	37	2	43.2585	81.348	36.9941	0.296642	0.00364658	42	17	0.111982	36	3.11062	0.0382384
ENST00000310682.6	chr16	522	1	1997	1317	53	627	SETD6	TAG	TAGC	18.4771	18.4771	0	0	165	165	0	0	9.25241	14.0297	0	0	0	33	12	0	27	0	0
ENST00000269445.10	chr18	149	-1	5004	1977	452	2575	DYM	TGA	TGAG	32.1389	26.9877	4.92722	0.223964	287	241	44	2	6.42264	13.6508	10.9009	0.0869765	0.00637151	69	46	0	63	0	0
ENST00000528647.5	chr8	457	-1	2950	1956	280	714	SYBU	TAA	TAAA	6.15902	6.15902	0	0	55	55	0	0	2.0878	3.14879	0	0	0	81	9	0	75	0	0
ENST00000380739.6	chr6	8	-1	2431	1107	54	1270	SERPINB1	TAG	TAGA	12.2061	12.0941	0.111982	0	109	108	1	0	5.02101	10.9251	2.07375	0	0	60	26	0	54	0	0
ENST00000392590.3	chr14	540	-1	1491	693	62	736	CDCA4	TGA	TGAG	35.2744	34.4905	0.447929	0.335947	315	308	4	3	23.6582	49.7699	7.22466	0.456449	0.0091712	33	11	0	27	0	0
ENST00000330173.5	chr19	673	1	5514	1578	523	3413	ZNF570	TAG	TAGA	4.47929	4.14334	0.335947	0	40	37	3	0	0.812349	2.62569	0.642346	0	0	24	67	0	18	0	0
ENST00000374518.6	chr10	149	1	7714	3816	63	3835	BMS1	TGA	TGAG	140.874	139.754	1.11982	0	1258	1248	10	0	18.2621	36.6231	17.775	0	0	42	81	0	36	0	0
ENST00000253754.8	chr5	398	1	2212	960	33	1219	PDLIM4	TGA	TGAG	4.47929	4.47929	0	0	40	40	0	0	2.025	4.66593	0	0	0	54	16	0	48	0	0
ENST00000380310.6	chr16	393	1	3751	2052	152	1547	FBXL19	TAG	TAGT	18.2531	17.8052	0	0.447929	163	159	0	4	4.8662	8.67699	0	0.289547	0.0333695	108	8	0	102	0	0
ENST00000228820.9	chr12	28	-1	4404	984	164	3256	PARP11	TGA	TGAT	6.15902	5.82308	0.335947	0	55	52	3	0	1.39851	5.91776	2.04846	0	0	81	72	0	75	0	0
ENST00000504169.2	chr4	662	1	3497	1710	156	1631	CDKN2AIP	TAA	TAAT	17.1333	16.5734	0.559911	0	153	148	5	0	4.89942	9.69203	3.58917	0	0	69	33	0	63	0	0
ENST00000354831.11	chr1	628	-1	3850	3627	184	39	NRDC	TAA	TAAA	242.889	241.098	1.79172	0	2169	2153	16	0	63.0882	66.4731	9.73759	0	0	42	1	0	36	0	0
ENST00000536220.5	chr19	680	-1	2212	1965	63	184	ZNF573	TAA	TAAG	6.15902	5.71109	0.447929	0	55	51	4	0	2.78437	2.90641	7.10998	0	0	60	2	0	54	0	0
ENST00000409180.1	chr2	424	1	606	501	22	83	MRPL35	TGA	TGAA	49.4962	49.3842	0.111982	0	442	441	1	0	81.6768	98.5712	5.0901	0	0	83	0	0	77	0	0
ENST00000273130.9	chr3	128	-1	2440	1539	82	819	DYNC1LI1	TGA	TGAA	154.983	152.968	2.01568	0	1384	1366	18	0	63.5178	99.3943	24.5815	0	0	45	20	0	39	0	0
ENST00000373542.9	chrX	354	-1	6241	3639	420	2182	PHKA1	TGA	TGAG	57.4469	56.3271	1.11982	0	513	503	10	0	9.20476	15.4787	2.66624	0	0	57	36	0	51	0	0
ENST00000336233.10	chr10	383	-1	2451	1167	34	1250	LIPA	TGA	TGAA	143.001	140.986	0.335947	1.67973	1277	1259	3	15	58.3441	120.81	9.88079	1.34379	0.0111231	36	28	0.447929	30	14.931	0.12359
ENST00000300005.7	chr16	262	-1	1434	954	37	443	ERI2	TGA	TGAG	9.29453	8.8466	0.447929	0	83	79	4	0	6.48154	9.27316	12.1062	0	0	33	9	0	27	0	0
ENST00000371996.9	chr10	370	1	2425	1431	17	977	MINPP1	TGA	TGAG	62.934	62.5981	0.223964	0.111982	562	559	2	1	25.9522	43.7443	13.1744	0.114618	0.00262019	21	21	0.111982	15	7.46548	0.170662
ENST00000284881.9	chr21	22	-1	5351	861	55	4435	C21orf91	TGA	TGAC	20.3808	19.8209	0.335947	0.223964	182	177	3	2	3.80878	23.0207	6.10812	0.0504993	0.00219364	72	87	0.111982	66	1.6967	0.0737031
ENST00000330579.6	chr12	927	1	1605	1518	26	61	NOC4L	TGA	TGAC	85.5544	84.9945	0.559911	0	764	759	5	0	53.3049	55.9911	21.535	0	0	21	1	0	15	0	0
ENST00000368654.8	chr10	658	-1	12671	9738	408	2525	MKI67	TGA	TGAC	119.709	116.909	2.57559	0.223964	1069	1044	23	2	9.44748	12.0055	6.31272	0.0886988	0.00738819	45	46	0.223964	39	5.74268	0.478338
ENST00000397011.2	chr7	24	1	2921	2412	34	475	EIF3B	TGA	TGAC	505.712	504.256	0.447929	1.00784	4516	4503	4	9	173.13	209.061	13.1744	2.12177	0.010149	105	2	0.559911	99	5.65567	0.0270527
ENST00000398090.3	chr8	76	1	7512	2061	42	5409	SLC7A2	TAA	TAAC	54.6473	54.3114	0	0.335947	488	485	0	3	7.27467	26.352	0	0.0621088	0.0023569	33	104	0.111982	27	4.14749	0.157388
ENST00000615984.4	chr17	963	1	1126	540	399	187	METTL23	TGA	TGAA	28.1075	15.7895	11.6462	0.671893	251	141	104	6	24.9623	29.2398	29.1884	3.59301	0.122881	66	5	0.223964	60	3.73274	0.12766
ENST00000312838.8	chr16	732	-1	1838	681	90	1067	RNF166	TGA	TGAA	4.25533	4.03136	0.111982	0.111982	38	36	1	1	2.31519	5.91977	1.24425	0.104951	0.0177288	309	11	0	303	0	0
ENST00000378204.6	chr8	467	-1	8225	2208	801	5216	EXT1	TGA	TGAG	18.0291	11.8701	6.15902	0	161	106	55	0	2.19199	5.37596	7.68917	0	0	123	94	0	117	0	0
ENST00000372805.7	chr1	501	1	2172	1395	45	732	CAP1	TAA	TAAG	227.772	226.204	1.11982	0.447929	2034	2020	10	4	104.867	162.154	24.8849	0.611925	0.00377374	99	8	0.223964	93	2.40822	0.0148515
ENST00000536133.2	chrX	528	-1	1044	594	47	403	CXorf56	TAA	TAAC	61.3663	59.3506	1.79172	0.223964	548	530	16	2	58.78	99.9168	38.1216	0.555743	0.00556206	42	10	0.111982	36	3.11062	0.0311321
ENST00000621418.4	chr3	416	-1	6180	3435	604	2141	MAGI1	TGA	TGAG	13.9978	12.542	1.34379	0.111982	125	112	12	1	2.26501	3.65124	2.22481	0.0523037	0.0143249	105	36	0	99	0	0
ENST00000006658.11	chr17	739	1	2589	2376	29	184	SPATA20	TGA	TGAC	2.57559	2.57559	0	0	23	23	0	0	0.994821	1.084	0	0	0	99	3	0	93	0	0
ENST00000264254.11	chr2	500	1	993	687	69	237	PDCL3	TGA	TGAG	35.9463	34.4905	1.11982	0.335947	321	308	10	3	36.1997	50.2046	16.2293	1.4175	0.0282344	96	3	0.335947	90	3.73274	0.0743506
ENST00000261908.11	chr15	333	1	7063	4353	207	2503	NEO1	TGA	TGAC	82.6429	81.5231	1.11982	0	738	728	10	0	11.7008	18.728	5.40977	0	0	60	32	0	54	0	0
ENST00000371113.9	chrX	573	1	5128	2673	175	2280	OCRL	TAA	TAAG	89.2499	87.3462	1.45577	0.447929	797	780	13	4	17.4044	32.6772	8.31868	0.19646	0.00601215	27	38	0.111982	21	5.33249	0.163187
ENST00000392092.7	chr6	920	1	1812	987	237	588	TBP	TAA	TAAT	39.5297	31.0191	8.28669	0.223964	353	277	74	2	21.8155	31.4276	34.9649	0.380892	0.0121196	51	6	0	45	0	0
ENST00000402966.1	chr22	295	1	4930	699	79	4152	C22orf46	TGA	TGAT	1.45577	1.00784	0	0.447929	13	9	0	4	0.295288	1.44183	0	0.107883	0.0748234	78	56	0	72	0	0
ENST00000614878.4	chr17	344	1	2625	1848	148	629	ANKRD13B	TAG	TAGC	11.5342	11.5342	0	0	103	103	0	0	4.39397	6.24143	0	0	0	234	4	0	228	0	0
ENST00000401903.5	chr7	12	-1	923	510	254	159	ZFAND2A	TGA	TGAA	4.59127	1.9037	2.68757	0	41	17	24	0	4.97429	3.73274	10.581	0	0	81	2	0	75	0	0
ENST00000367998.5	chr1	1329	-1	1826	1149	179	498	B4GALT3	TGA	TGAC	21.7246	15.1176	6.38299	0.223964	194	135	57	2	11.8973	13.1572	35.6592	0.449728	0.0341812	93	11	0.223964	87	2.5743	0.195658
ENST00000328697.11	chr11	266	-1	1407	1089	15	303	CCDC34	TAG	TAGC	35.3864	35.1624	0	0.223964	316	314	0	2	25.1502	32.2887	0	0.739157	0.0228921	81	5	0.111982	75	1.4931	0.046242
ENST00000546897.5	chr12	398	-1	1710	1419	150	141	KRT8	TGA	TGAA	3.1355	3.02352	0.111982	0	28	27	1	0	1.83363	2.13074	0.746548	0	0	78	1	0	72	0	0
ENST00000535206.5	chr9	112	-1	1490	645	181	664	B4GALT1	TGA	TGAA	7.27885	6.60695	0.671893	0	65	59	6	0	4.88513	10.2433	3.71212	0	0	51	7	0	45	0	0
ENST00000590474.7	chr17	875	1	13360	972	282	12106	MAP2K6	TAA	TAAA	20.4928	15.2296	4.92722	0.335947	183	136	43	3	1.53389	15.6683	17.4724	0.0277504	0.00177112	24	204	0	18	0	0
ENST00000328205.9	chr1	1727	-1	3522	1644	540	1338	LIN9	TGA	TGAG	71.2207	71.1087	0	0.111982	636	635	0	1	20.2217	43.2535	0	0.0836938	0.00193496	135	22	0	129	0	0
ENST00000361575.4	chrX	533	-1	345	123	48	174	RPL39	TAA	TAAG	353.416	241.546	110.414	1.45577	3156	2156	986	13	1024.39	1963.79	2300.3	8.36649	0.00426039	72	4	0.895858	66	13.5736	0.00691196
ENST00000366654.5	chr1	1767	-1	1458	522	37	899	FAM89A	TAG	TAGA	6.04704	5.82308	0.111982	0.111982	54	52	1	1	4.14749	11.1553	3.02655	0.124563	0.0111663	21	18	0	15	0	0
ENST00000421852.6	chr3	891	-1	2760	762	68	1930	TMEM41A	TGA	TGAT	18.1411	16.9093	0.559911	0.671893	162	151	5	6	6.57287	22.1907	8.23399	0.348131	0.0156882	51	30	0	45	0	0
ENST00000443527.6	chr11	330	1	4158	1812	16	2330	CRY2	TGA	TGAG	11.8701	11.8701	0	0	106	106	0	0	2.85477	6.55084	0	0	0	24	25	0	18	0	0
ENST00000335135.8	chr8	55	1	3369	1296	552	1521	GATA4	TAA	TAAT	18.925	14.4457	4.47929	0	169	129	40	0	5.61739	11.1464	8.11466	0	0	540	10	0	534	0	0
ENST00000263382.8	chr19	383	-1	1644	576	127	941	ASF1B	TAA	TAAC	54.9833	52.2957	2.12766	0.559911	491	467	19	5	33.4448	90.7912	16.7532	0.595017	0.00655369	225	13	0.335947	219	1.534	0.016896
ENST00000376663.8	chr10	94	1	3495	948	611	1936	BMI1	TGA	TGAT	55.9911	44.5689	11.0862	0.335947	500	398	99	3	16.0204	47.0136	18.1444	0.173526	0.00369098	39	50	0	33	0	0
ENST00000650709.1	chr12	942	-1	2009	1614	287	108	ZNF891	TAA	TAAA	3.1355	2.68757	0.447929	0	28	24	4	0	1.56073	1.66516	1.56073	0	0	108	0	0	102	0	0
ENST00000413384.7	chr7	788	1	4074	3693	231	150	SLC4A2	TAG	TAGC	81.5231	77.1558	4.36731	0	728	689	39	0	20.0106	20.8924	18.9061	0	0	99	2	0	93	0	0
ENST00000245816.10	chr19	174	1	1027	801	38	188	CLPP	TGA	TGAG	74.9161	73.9083	1.00784	0	669	660	9	0	72.9466	92.27	26.5221	0	0	105	3	0	99	0	0
ENST00000317204.11	chr11	45	-1	3582	792	128	2662	TOLLIP	TAG	TAGA	16.0135	14.3337	1.45577	0.223964	143	128	13	2	4.47054	18.0981	11.3732	0.0841339	0.00464876	372	27	0	366	0	0
ENST00000525962.5	chr1	806	-1	3882	2523	56	1303	TGFBR3	TAG	TAGC	30.7951	30.5712	0.223964	0	275	273	2	0	7.9328	12.117	3.99937	0	0	135	16	0	129	0	0
ENST00000263918.9	chr2	179	-1	14129	2310	67	11752	STRN	TGA	TGAC	49.2722	48.3763	0.447929	0.447929	440	432	4	4	3.48731	20.9421	6.68551	0.0381151	0.00182002	36	247	0.111982	30	3.73274	0.178241
ENST00000372577.2	chr9	543	1	5644	5217	15	412	NUP188	TAG	TAGG	357.559	357.559	0	0	3193	3193	0	0	63.3521	68.5373	0	0	0	153	2	0	147	0	0
ENST00000539310.5	chrX	515	1	2992	1860	27	1105	PLS3	TAA	TAAA	1904.48	1902.58	0	1.9037	17007	16990	0	17	636.525	1022.89	0	1.7228	0.00168425	18	21	0.111982	12	9.33185	0.00912301
ENST00000400577.4	chr21	15	1	1910	813	24	1073	RBM11	TAG	TAGT	5.59911	5.59911	0	0	50	50	0	0	2.93147	6.88698	0	0	0	78	27	0	72	0	0
ENST00000397053.6	chr10	44	-1	5324	3786	269	1269	UPF2	TGA	TGAT	56.775	54.5354	2.23964	0	507	487	20	0	10.664	14.4045	8.32582	0	0	39	26	0	33	0	0
ENST00000646651.1	chr1	1560	-1	833	561	100	172	UBE2T	TAG	TAGG	142.329	128.668	12.9899	0.671893	1271	1149	116	6	170.864	229.354	129.899	3.90636	0.017032	24	5	0.335947	18	18.6637	0.0813751
ENST00000361125.1	chr7	426	-1	5692	2241	314	3137	SMURF1	TGA	TGAA	16.9093	16.0135	0.783876	0.111982	151	143	7	1	2.97072	7.14568	2.49642	0.0356972	0.00499564	27	33	0	21	0	0
ENST00000371437.5	chrX	536	1	376	180	74	122	NDUFA1	TAA	TAAG	244.569	229.228	8.39867	6.9429	2183	2046	74	62	650.45	1273.49	113.496	56.909	0.0446875	60	4	5.59911	54	103.687	0.08142
ENST00000375394.7	chr6	255	1	3750	3708	12	30	SKIV2L	TGA	TGAA	49.8321	49.8321	0	0	445	445	0	0	13.2886	13.4391	0	0	0	21	3	0	15	0	0
ENST00000221086.8	chr8	51	1	7036	1617	67	5352	MTMR9	TGA	TGAA	10.9743	10.9743	0	0	98	98	0	0	1.55973	6.7868	0	0	0	126	102	0	120	0	0
ENST00000000233.10	chr7	612	1	987	510	82	395	ARF5	TAA	TAAC	104.255	103.472	0.671893	0.111982	931	924	6	1	105.629	202.885	8.19382	0.283499	0.00139734	312	3	0.111982	306	0.365955	0.00180375
ENST00000324170.7	chr5	414	-1	2133	480	61	1592	ZCCHC10	TAG	TAGA	21.6126	21.1646	0.111982	0.335947	193	189	1	3	10.1325	44.093	1.83577	0.211022	0.00478583	33	37	0	27	0	0
ENST00000391785.7	chr19	1105	1	2589	1365	121	1103	ZNF701	TAG	TAGA	3.1355	3.02352	0.111982	0	28	27	1	0	1.21109	2.21503	0.925473	0	0	336	17	0	330	0	0
ENST00000234142.9	chr2	45	1	8399	5817	256	2326	GREB1	TGA	TGAG	6.60695	6.49497	0.111982	0	59	58	1	0	0.786636	1.11655	0.437431	0	0	24	31	0	18	0	0
ENST00000400099.5	chr21	28	-1	447	327	40	80	ATP5PF	TAA	TAAC	149.048	148.488	0.559911	0	1331	1326	5	0	333.442	454.093	13.9978	0	0	80	0	0	74	0	0
ENST00000366669.9	chr1	1761	1	2887	2184	120	583	COG2	TAA	TAAG	96.0808	94.9609	1.00784	0.111982	858	848	9	1	33.2805	43.4803	8.39867	0.192079	0.00441762	33	12	0.111982	27	4.14749	0.0953878
ENST00000532462.5	chr14	204	-1	2666	2427	47	192	PYGL	TAA	TAAG	275.14	274.692	0.447929	0	2457	2453	4	0	103.203	113.182	9.5304	0	0	24	3	0	18	0	0
ENST00000527249.5	chr11	639	-1	844	465	353	26	EIF1AD	TGA	TGAG	35.7223	20.3808	15.3416	0	319	182	137	0	42.325	43.8296	43.4605	0	0	26	0	0	20	0	0
ENST00000263409.8	chr5	101	-1	10044	3261	157	6626	LIFR	TAA	TAAC	23.9642	23.2923	0.111982	0.559911	214	208	1	5	2.38592	7.14269	0.713263	0.0845021	0.0118306	165	116	0.111982	159	0.704291	0.098603
ENST00000334513.6	chr1	1003	1	1428	954	5	469	NUDT17	TGA	TGAA	2.91154	2.91154	0	0	26	26	0	0	2.03889	3.05193	0	0	0	21	9	0	15	0	0
ENST00000540393.6	chr17	39	1	3173	2103	230	840	RAP1GAP2	TAA	TAAT	10.7503	10.7503	0	0	96	96	0	0	3.38805	5.11189	0	0	0	99	10	0	93	0	0
ENST00000249289.5	chr7	629	1	633	327	43	263	ATP6V1F	TAG	TAGG	100.784	97.2006	3.1355	0.447929	900	868	28	4	159.216	297.25	72.9187	1.70315	0.00572971	129	4	0.111982	123	0.910425	0.00306283
ENST00000371899.9	chr9	606	-1	2446	1491	34	921	SLC2A6	TAG	TAGG	11.7581	11.7581	0	0	105	105	0	0	4.80709	7.88607	0	0	0	132	6	0	126	0	0
ENST00000427716.6	chr12	253	1	8197	2268	418	5511	FGD4	TGA	TGAA	3.8074	3.47145	0.335947	0	34	31	3	0	0.464487	1.53062	0.8037	0	0	156	119	0	150	0	0
ENST00000315190.4	chr13	85	1	3054	291	332	2431	SERTM1	TGA	TGAG	1.34379	0.335947	0.783876	0.223964	12	3	7	2	0.440009	1.15446	2.36107	0.0921285	0.0798026	21	46	0	15	0	0
ENST00000598485.6	chr19	759	-1	508	171	208	129	C19orf54	TAG	TAGC	10.0784	2.79956	7.27885	0	90	25	65	0	19.8394	16.3717	34.9945	0	0	129	0	0	123	0	0
ENST00000382297.6	chr9	5	1	5006	4026	116	864	KANK1	TGA	TGAT	17.8052	17.2453	0.447929	0.111982	159	154	4	1	3.55677	4.28347	3.86146	0.129609	0.0302579	39	17	0	33	0	0
ENST00000396442.7	chr5	200	1	6136	1536	173	4427	OCLN	TAG	TAGA	48.0404	45.8007	2.12766	0.111982	429	409	19	1	7.82927	29.8182	12.2986	0.0252953	0.000848317	39	99	0.111982	33	3.3934	0.113803
ENST00000374050.4	chr9	431	1	1518	324	64	1130	ATP6V1G1	TAG	TAGA	97.8725	94.513	2.91154	0.447929	874	844	25	4	64.4746	291.707	45.4928	0.396397	0.00135889	87	28	0	81	0	0
ENST00000266517.8	chr12	213	1	7114	1326	83	5705	ETNK1	TAA	TAAA	102.016	101.008	0	1.00784	911	902	0	9	14.3402	76.175	0	0.176659	0.00231912	27	143	0	21	0	0
ENST00000485846.5	chr7	545	1	2375	1512	665	198	HBP1	TAA	TAAA	17.2453	17.1333	0.111982	0	154	153	1	0	7.26116	11.3315	0.168394	0	0	45	5	0	39	0	0
ENST00000341318.9	chr11	623	1	2035	1608	10	417	KAT5	TGA	TGAC	44.6809	44.5689	0	0.111982	399	398	0	1	21.9562	27.717	0	0.268543	0.00968873	417	0	0.111982	411	0.272463	0.00983017
ENST00000274376.10	chr5	282	1	3707	3111	558	38	RASA1	TAG	TAGC	35.8343	31.467	4.36731	0	320	281	39	0	9.66666	10.1148	7.82672	0	0	38	0	0	32	0	0
ENST00000617763.1	chr22	306	-1	1138	432	56	650	NDUFA6	TGA	TGAA	129.787	129.563	0	0.223964	1159	1157	0	2	114.049	299.915	0	0.344561	0.00114886	39	8	0.223964	33	6.7868	0.0226291
ENST00000432825.7	chr9	187	-1	4657	2838	170	1649	FBXO10	TGA	TGAG	12.43	12.43	0	0	111	111	0	0	2.66911	4.37986	0	0	0	240	14	0	234	0	0
ENST00000303887.9	chr7	450	-1	2912	2127	640	145	MCM7	TGA	TGAT	771.334	755.096	15.6775	0.559911	6888	6743	140	5	264.881	355.005	24.4961	3.86146	0.0108772	69	2	0.559911	63	8.88748	0.0250348
ENST00000366661.9	chr1	1765	-1	3231	2550	25	656	TTC13	TAG	TAGT	47.2565	47.2565	0	0	422	422	0	0	14.626	18.532	0	0	0	126	12	0	120	0	0
ENST00000585482.6	chr17	314	1	10232	2142	333	7757	SARM1	TAA	TAAC	12.318	10.4143	1.67973	0.223964	110	93	15	2	1.20387	4.86197	5.04425	0.0288726	0.00593844	30	99	0	24	0	0
ENST00000238714.8	chr2	269	1	7303	2178	205	4920	PAPOLG	TAA	TAAA	43.7851	40.9855	2.79956	0	391	366	25	0	5.99549	18.818	13.6564	0	0	21	110	0	15	0	0
ENST00000578921.6	chr18	35	1	3874	555	99	3220	RAB31	TGA	TGAC	4.59127	4.14334	0.335947	0.111982	41	37	3	1	1.18515	7.46548	3.3934	0.0347771	0.00465839	165	55	0	159	0	0
ENST00000395405.5	chr10	215	-1	1806	801	31	974	ZWINT	TGA	TGAC	147.257	145.801	0.223964	1.2318	1315	1302	2	11	81.5375	182.024	7.22466	1.26469	0.00694793	36	17	1.00784	30	33.5947	0.184562
ENST00000343213.2	chr7	575	1	731	306	36	389	CAV2	TAA	TAAT	4.47929	4.36731	0	0.111982	40	39	0	1	6.12762	14.2722	0	0.287872	0.0201701	24	11	0	18	0	0
ENST00000324679.4	chr14	202	-1	3018	1119	358	1541	SAV1	TGA	TGAG	8.51065	5.37515	2.91154	0.223964	76	48	26	2	2.81996	4.80353	8.13279	0.145337	0.0302563	21	34	0	15	0	0
ENST00000373166.8	chr1	459	-1	1237	510	102	625	TRAPPC3	TAA	TAAC	60.0225	57.7828	1.45577	0.783876	536	516	13	7	48.5226	113.3	14.2722	1.2542	0.0110698	87	3	0.111982	81	1.3825	0.0122021
ENST00000357814.7	chr17	901	-1	1830	591	68	1171	NAT9	TGA	TGAT	13.4379	13.4379	0	0	120	120	0	0	7.3431	22.7375	0	0	0	33	13	0	27	0	0
ENST00000368575.3	chr1	1165	-1	1131	579	110	442	RAB13	TGA	TGAG	41.7694	40.2016	1.56775	0	373	359	14	0	36.9314	69.4329	14.2523	0	0	108	4	0	102	0	0
ENST00000297029.10	chr7	76	1	9637	2115	61	7461	SCIN	TAA	TAAA	3.1355	3.1355	0	0	28	28	0	0	0.325361	1.48251	0	0	0	99	123	0	93	0	0
ENST00000316077.14	chrX	632	-1	4340	2598	36	1706	MAP7D3	TAA	TAAG	109.855	109.183	0.447929	0.223964	981	975	4	2	25.3121	42.0257	12.4425	0.13128	0.00312382	63	32	0.223964	57	3.9292	0.0934953
ENST00000643683.1	chr17	492	-1	2447	1203	228	1016	SMARCE1	TAA	TAAG	87.0102	83.0908	3.8074	0.111982	777	742	33	1	35.5579	69.0697	16.6991	0.110219	0.00159576	39	20	0	33	0	0
ENST00000375128.4	chr9	338	-1	1372	789	59	524	XPA	TGA	TGAT	22.9564	22.3964	0.559911	0	205	200	5	0	16.732	28.3859	9.49002	0	0	42	13	0	36	0	0
ENST00000371208.4	chr1	686	1	5716	2154	163	3399	HOOK1	TAA	TAAA	62.2621	60.8064	1.34379	0.111982	556	543	12	1	10.8926	28.2295	8.24409	0.0329456	0.00116706	39	77	0	33	0	0
ENST00000372569.7	chr6	431	-1	917	582	-1	336	CRIP3	TGA	TGAG	4.36731	2.01568	2.35163	0	39	18	21	0	4.7626	3.46337	-2351.63	0	0	153	3	0	147	0	0
ENST00000185150.9	chr2	249	1	2401	1419	161	821	ERLEC1	TAA	TAAA	24.1882	22.8444	1.2318	0.111982	216	204	11	1	10.0742	16.0989	7.65096	0.136397	0.00847245	36	20	0.111982	30	3.73274	0.231863
ENST00000393881.7	chr17	562	1	1553	543	135	875	NKIRAS2	TGA	TGAA	18.4771	12.9899	5.37515	0.111982	165	116	48	1	11.8977	23.9225	39.8159	0.12798	0.00534975	183	7	0	177	0	0
ENST00000398665.8	chr19	69	1	7607	4581	246	2780	DOT1L	TAG	TAGG	30.1232	29.2274	0.559911	0.335947	269	261	5	3	3.95993	6.38013	2.27606	0.120844	0.0189407	189	27	0	183	0	0
ENST00000314565.9	chr12	158	1	6377	558	368	5451	BORCS5	TAG	TAGC	8.73462	7.27885	1.34379	0.111982	78	65	12	1	1.36971	13.0445	3.6516	0.0205434	0.00157487	66	91	0	60	0	0
ENST00000651671.1	chr9	645	-1	9523	7635	256	1632	NOTCH1	TAA	TAAA	29.8993	29.7873	0.111982	0	267	266	1	0	3.13969	3.90141	0.437431	0	0	225	15	0	219	0	0
ENST00000273990.6	chr4	416	-1	2559	549	209	1801	DDIT4L	TAA	TAAA	2.23964	1.67973	0.447929	0.111982	20	15	4	1	0.875203	3.05962	2.1432	0.0621778	0.020322	39	40	0	33	0	0
ENST00000219271.4	chr16	515	1	4017	1977	591	1449	MMP15	TGA	TGAC	9.51849	8.51065	1.00784	0	85	76	9	0	2.36955	4.30483	1.70531	0	0	84	13	0	78	0	0
ENST00000432496.6	chr4	437	-1	3317	2649	180	488	TBCK	TGA	TGAA	14.5577	14.4457	0.111982	0	130	129	1	0	4.38881	5.45327	0.622124	0	0	30	10	0	24	0	0
ENST00000325495.9	chr19	236	1	2432	2160	18	254	HNRNPM	TAA	TAAG	921.502	919.598	0	1.9037	8229	8212	0	17	378.907	425.74	0	7.49487	0.0176044	123	8	1.56775	117	13.3996	0.0314736
ENST00000427478.6	chr16	447	1	2072	345	104	1623	CNEP1R1	TGA	TGAC	4.14334	3.35947	0.335947	0.447929	37	30	3	4	1.99968	9.73759	3.23026	0.275988	0.0283426	99	38	0.223964	93	2.40822	0.247312
ENST00000338146.7	chr12	494	1	10724	591	8	10125	SPRYD4	TAG	TAGT	21.7246	21.5006	0.111982	0.111982	194	192	1	1	2.02579	36.38	13.9978	0.01106	0.000304012	24	155	0	18	0	0
ENST00000360586.8	chr14	229	-1	5974	3357	82	2535	WDHD1	TAA	TAAA	95.1849	94.737	0.447929	0	850	846	4	0	15.9332	28.2207	5.46255	0	0	27	68	0	21	0	0
ENST00000493901.5	chr1	352	-1	4264	3834	234	196	MAP3K6	TGA	TGAG	8.1747	7.39083	0.783876	0	73	66	7	0	1.91714	1.92771	3.3499	0	0	196	0	0	190	0	0
ENST00000399169.8	chr10	253	1	3236	2937	77	222	STOX1	TAA	TAAT	5.15118	5.15118	0	0	46	46	0	0	1.59184	1.75389	0	0	0	33	3	0	27	0	0
ENST00000205636.4	chr3	127	-1	3262	519	101	2642	CMTM6	TAA	TAAA	56.551	51.7358	3.69541	1.11982	505	462	33	10	17.3363	99.6836	36.5883	0.423854	0.00425199	27	48	0	21	0	0
ENST00000645818.1	chr16	746	1	3314	2355	290	669	SPG7	TAG	TAGT	30.5712	30.5712	0	0	273	273	0	0	9.22485	12.9814	0	0	0	42	8	0	36	0	0
ENST00000360238.6	chr17	771	-1	2148	1128	713	307	CUEDC1	TAA	TAAG	5.48713	4.36731	1.00784	0.111982	49	39	9	1	2.55453	3.87173	1.41352	0.364763	0.094212	33	2	0.111982	27	4.14749	1.07123
ENST00000557943.6	chr15	382	-1	2244	969	75	1200	ETFA	TGA	TGAA	340.314	333.707	5.93506	0.671893	3039	2980	53	6	151.655	344.383	79.1341	0.559911	0.00162584	18	26	0.111982	12	9.33185	0.0270973
ENST00000379095.4	chr15	478	1	7192	843	2	6347	NGRN	TGA	TGAG	44.233	36.2822	0	7.95074	395	324	0	71	6.1503	43.0394	0	1.25268	0.0291053	54	106	0	48	0	0
ENST00000584667.6	chr17	932	1	2455	894	29	1532	SAP30BP	TGA	TGAC	51.7358	51.3999	0.111982	0.223964	462	459	1	2	21.0736	57.4942	3.86146	0.146191	0.00254271	18	14	0	12	0	0
ENST00000240423.9	chr2	461	1	5985	2193	58	3734	NCAPH	TGA	TGAG	145.689	145.129	0.447929	0.111982	1301	1296	4	1	24.3423	66.1783	7.72291	0.0299899	0.000453168	180	64	0.111982	174	0.643576	0.00972488
ENST00000335754.8	chr3	375	-1	3534	1842	45	1647	ACTR8	TGA	TGAA	82.195	81.4111	0.783876	0	734	727	7	0	23.2583	44.1971	17.4195	0	0	51	34	0	45	0	0
ENST00000320356.6	chr7	755	-1	2594	2223	116	255	EZH2	TGA	TGAC	78.4996	77.4917	0.895858	0.111982	701	692	8	1	30.262	34.8591	7.72291	0.439146	0.0125978	96	6	0	90	0	0
ENST00000355300.6	chr15	390	-1	3010	1830	169	1011	LINGO1	TGA	TGAG	6.27101	5.93506	0.335947	0	56	53	3	0	2.08339	3.2432	1.98785	0	0	231	8	0	225	0	0
ENST00000313486.11	chr17	18	-1	3867	780	250	2837	PITPNA	TAA	TAAA	37.962	35.9463	1.79172	0.223964	339	321	16	2	9.81691	46.085	7.16686	0.0789441	0.00171301	171	36	0	165	0	0
ENST00000376442.8	chr6	197	-1	3361	3093	159	109	DHX16	TAA	TAAG	76.0359	70.6608	5.37515	0	679	631	48	0	22.623	22.8454	33.806	0	0	24	3	0	18	0	0
ENST00000586027.5	chr19	389	-1	1341	969	208	164	GIPC1	TAG	TAGG	58.2308	49.9441	8.28669	0	520	446	74	0	43.4234	51.5419	39.8398	0	0	24	2	0	18	0	0
ENST00000244040.4	chr20	401	1	8606	552	256	7798	RAB22A	TGA	TGAC	7.95074	6.38299	1.00784	0.559911	71	57	9	5	0.92386	11.5634	3.93688	0.0718019	0.00620942	36	144	0	30	0	0
ENST00000389082.10	chr12	247	-1	9461	3792	298	5371	DENND5B	TAA	TAAC	22.9564	22.3964	0.335947	0.223964	205	200	3	2	2.42642	5.90624	1.12734	0.0416988	0.00706014	162	120	0	156	0	0
ENST00000396672.5	chr11	170	-1	2513	1512	368	633	STK33	TAA	TAAG	8.62263	8.39867	0.223964	0	77	75	2	0	3.43121	5.55468	0.608599	0	0	48	10	0	42	0	0
ENST00000221418.9	chr19	702	-1	1155	954	16	185	ECH1	TGA	TGAG	74.1322	73.9083	0.223964	0	662	660	2	0	64.1838	77.472	13.9978	0	0	78	3	0	72	0	0
ENST00000611477.1	chr8	615	-1	2483	2016	95	372	ZNF16	TAG	TAGG	9.07056	8.8466	0.223964	0	81	79	2	0	3.65307	4.38819	2.35752	0	0	333	1	0	327	0	0
ENST00000361786.7	chr14	387	1	4280	1167	150	2963	CIPC	TAG	TAGC	18.925	15.0056	3.91938	0	169	134	35	0	4.42173	12.8583	26.1292	0	0	84	50	0	78	0	0
ENST00000354883.10	chr3	417	1	2628	792	722	1114	SLC25A26	TGA	TGAA	23.4043	18.2531	5.15118	0	209	163	46	0	8.90574	23.0469	7.1346	0	0	87	15	0	81	0	0
ENST00000342228.7	chr8	227	-1	3612	1926	364	1322	SLC20A2	TGA	TGAT	8.95858	7.61479	1.34379	0	80	68	12	0	2.48023	3.95368	3.69172	0	0	192	15	0	186	0	0
ENST00000263377.6	chr19	408	-1	7124	4056	216	2852	BRD4	TGA	TGAG	71.3327	68.3092	2.91154	0.111982	637	610	26	1	10.013	16.8415	13.4793	0.0392645	0.00233141	21	35	0	15	0	0
ENST00000424830.6	chrX	22	-1	1289	723	39	527	PUDP	TGA	TGAG	12.878	12.878	0	0	115	115	0	0	9.99066	17.8118	0	0	0	105	10	0	99	0	0
ENST00000532743.6	chr15	83	1	1494	987	97	410	RAD51	TGA	TGAA	24.7481	24.5241	0	0.223964	221	219	0	2	16.565	24.8471	0	0.546255	0.0219846	24	7	0	18	0	0
ENST00000340457.8	chr7	517	-1	1297	759	44	494	UPK3BL1	TGA	TGAG	13.9978	13.8858	0	0.111982	125	124	0	1	10.7924	18.2949	0	0.226685	0.0123906	141	4	0	135	0	0
ENST00000349780.9	chr9	442	-1	6187	5649	183	355	CDK5RAP2	TGA	TGAG	83.2028	82.083	1.11982	0	743	733	10	0	13.448	14.5305	6.11925	0	0	306	2	0	300	0	0
ENST00000290295.7	chr17	701	-1	3422	822	579	2021	HOXB13	TAA	TAAG	7.83876	6.49497	1.2318	0.111982	70	58	11	1	2.29069	7.90142	2.12747	0.0554093	0.00701257	96	32	0	90	0	0
ENST00000616316.1	chr11	9	1	847	366	260	221	IFITM2	TAG	TAGA	7.95074	6.60695	1.34379	0	71	59	12	0	9.38694	18.0518	5.16841	0	0	18	2	0	12	0	0
ENST00000650590.1	chr3	156	1	2288	1635	65	588	XYLB	TGA	TGAT	28.6675	28.1075	0.559911	0	256	251	5	0	12.5295	17.1912	8.61402	0	0	36	11	0	30	0	0
ENST00000301012.8	chr16	730	-1	1754	1170	5	579	MVD	TGA	TGAC	28.2195	27.4357	0.223964	0.559911	252	245	2	5	16.0887	23.4493	44.7929	0.967032	0.0412393	285	4	0.447929	279	1.60548	0.0684661
ENST00000589328.5	chr18	132	-1	2855	906	63	1886	PSTPIP2	TAG	TAGT	18.2531	17.9172	0.223964	0.111982	163	160	2	1	6.39338	19.7761	3.55499	0.0593755	0.00300239	66	39	0	60	0	0
ENST00000310418.8	chr5	702	-1	1170	657	200	313	CLTB	TAG	TAGG	38.7459	33.8186	4.36731	0.559911	346	302	39	5	33.1161	51.4743	21.8365	1.78885	0.0347523	258	2	0.559911	252	2.22187	0.0431646
ENST00000244289.9	chr19	806	-1	3723	3198	233	292	LIPE	TAA	TAAA	3.47145	3.47145	0	0	31	31	0	0	0.932433	1.08551	0	0	0	285	1	0	279	0	0
ENST00000433197.4	chr17	840	-1	7850	2901	109	4840	ERN1	TGA	TGAG	7.95074	7.61479	0.223964	0.111982	71	68	2	1	1.01283	2.62489	2.05472	0.0231368	0.00881441	39	60	0	33	0	0
ENST00000264720.7	chr2	127	-1	3837	2703	314	820	GTF3C2	TAG	TAGC	83.9867	79.9553	3.8074	0.223964	750	714	34	2	21.8886	29.5802	12.1255	0.273127	0.00923345	120	14	0.111982	114	0.9823	0.033208
ENST00000342745.5	chr14	319	1	5345	879	307	4159	SUSD6	TGA	TGAG	7.83876	6.60695	1.2318	0	70	59	11	0	1.46656	7.51644	4.01239	0	0	435	54	0	429	0	0
ENST00000261867.5	chr15	165	-1	7065	1257	257	5551	SLC30A4	TAA	TAAT	3.35947	2.91154	0.335947	0.111982	30	26	3	1	0.475508	2.31626	1.30719	0.0201733	0.00870945	78	91	0	72	0	0
ENST00000331808.5	chr16	193	-1	1524	255	457	812	DEXI	TAG	TAGG	6.15902	1.2318	4.36731	0.559911	55	11	39	5	4.04135	4.83061	9.55647	0.689546	0.142745	501	7	0.559911	495	1.13113	0.23416
ENST00000217958.8	chrX	487	-1	1425	648	16	761	PSMD10	TAA	TAAA	155.655	155.095	0.111982	0.447929	1390	1385	1	4	109.232	239.345	6.99889	0.588606	0.00245924	150	13	0.223964	144	1.55531	0.0064982
ENST00000552864.5	chr12	621	-1	6067	669	197	5201	LIN7A	TAG	TAGG	18.4771	17.8052	0.447929	0.223964	165	159	4	2	3.0455	26.6146	2.27375	0.0430618	0.00161798	78	98	0	72	0	0
ENST00000219070.9	chr16	467	1	3469	1950	276	1243	MMP2	TGA	TGAG	4.59127	4.36731	0.223964	0	41	39	2	0	1.32351	2.23964	0.811466	0	0	66	11	0	60	0	0
ENST00000389506.10	chr11	994	1	13633	11877	17	1739	KMT2A	TAA	TAAA	63.158	63.046	0	0.111982	564	563	0	1	4.63273	5.30824	0	0.0643946	0.0121311	129	32	0	123	0	0
ENST00000652332.1	chr7	756	-1	2722	1905	91	726	PDIA4	TGA	TGAA	442.554	439.082	3.1355	0.335947	3952	3921	28	3	162.584	230.489	34.4561	0.462737	0.00200763	156	9	0.335947	150	2.23964	0.00971691
ENST00000287996.8	chr9	301	-1	4223	1443	137	2643	IPPK	TAA	TAAC	17.0213	16.6854	0.223964	0.111982	152	149	2	1	4.03062	11.563	1.63478	0.0423694	0.00366423	30	43	0	24	0	0
ENST00000229214.9	chr12	605	-1	10059	1113	6	8940	KRR1	TAA	TAAC	142.217	141.546	0	0.671893	1270	1264	0	6	14.1383	127.175	0	0.0751559	0.000590965	51	206	0.111982	45	2.48849	0.0195675
ENST00000340541.4	chr18	37	1	1182	852	189	141	VAPA	TAG	TAGA	93.1692	85.8904	7.16686	0.111982	832	767	64	1	78.8234	100.81	37.9199	0.7942	0.00787817	45	3	0	39	0	0
ENST00000361648.6	chrX	645	-1	5965	3327	93	2545	ATP11C	TAA	TAAA	94.737	93.9531	0.111982	0.671893	846	839	1	6	15.8821	28.2396	1.20411	0.264005	0.00934877	108	58	0.223964	102	2.19573	0.0777536
ENST00000391831.5	chr19	1029	-1	1980	738	377	865	AKT1S1	TGA	TGAA	21.1646	20.8287	0	0.335947	189	186	0	3	10.6892	28.2232	0	0.388378	0.013761	78	5	0.223964	72	3.11062	0.110215
ENST00000366472.6	chr1	1868	-1	3103	1149	506	1448	SH3BP5L	TAG	TAGC	6.04704	1.9037	4.14334	0	54	17	37	0	1.94877	1.65683	8.18843	0	0	288	9	0	282	0	0
ENST00000302824.7	chr15	422	-1	4842	609	36	4197	STARD5	TAA	TAAT	2.12766	2.01568	0	0.111982	19	18	0	1	0.439418	3.30982	0	0.0266815	0.00806131	201	63	0	195	0	0
ENST00000326729.9	chr1	891	1	1276	555	262	459	GSTM4	TGA	TGAT	7.72678	6.27101	1.45577	0	69	56	13	0	6.05547	11.2991	5.55637	0	0	102	7	0	96	0	0
ENST00000355341.8	chr15	88	1	2730	1383	495	852	ZFYVE19	TGA	TGAA	6.38299	6.38299	0	0	57	57	0	0	2.33809	4.61532	0	0	0	225	15	0	219	0	0
ENST00000398209.7	chr7	366	1	9099	2667	40	6392	ADAM22	TAA	TAAG	12.9899	12.766	0	0.223964	116	114	0	2	1.42762	4.78664	0	0.0350383	0.00732001	117	121	0	111	0	0
ENST00000342216.8	chr19	387	1	2915	2814	25	76	PKN1	TAG	TAGC	48.0404	48.0404	0	0	429	429	0	0	16.4804	17.0719	0	0	0	45	1	0	39	0	0
ENST00000351328.8	chr12	486	-1	2870	1368	123	1379	CS	TAA	TAAA	419.038	413.214	4.36731	1.45577	3742	3690	39	13	146.006	302.057	35.5066	1.05567	0.00349493	51	23	0.223964	45	4.97699	0.016477
ENST00000267116.8	chr12	484	-1	8636	3198	109	5329	ANKRD52	TAG	TAGC	73.0124	72.2286	0.335947	0.447929	652	645	3	4	8.45443	22.5855	3.08208	0.084055	0.00372163	42	55	0	36	0	0
ENST00000263577.11	chr11	1096	-1	4141	3762	122	257	CDON	TGA	TGAG	19.9328	19.5969	0.335947	0	178	175	3	0	4.81353	5.20917	2.75366	0	0	87	1	0	81	0	0
ENST00000298510.4	chr10	603	-1	1508	738	16	754	PRDX3	TAG	TAGA	508.847	506.832	0.111982	1.9037	4544	4526	1	17	337.432	686.764	6.99889	2.5248	0.00367637	33	20	0	27	0	0
ENST00000296149.9	chr3	248	-1	1307	768	116	423	ELP6	TGA	TGAC	46.2487	43.1132	2.91154	0.223964	413	385	26	2	35.3854	56.1369	25.0995	0.529467	0.0094317	30	7	0	24	0	0
ENST00000202556.13	chr14	523	-1	4913	3240	277	1396	PPP1R13B	TGA	TGAA	13.1019	12.43	0.447929	0.223964	117	111	4	2	2.66679	3.83643	1.61707	0.160433	0.0418183	51	14	0	45	0	0
ENST00000308127.9	chr11	676	1	2736	1947	90	699	SSH3	TGA	TGAG	4.47929	4.47929	0	0	40	40	0	0	1.63717	2.30061	0	0	0	255	4	0	249	0	0
ENST00000538402.1	chr9	647	-1	1312	804	33	475	AGPAT2	TAG	TAGC	14.7817	14.3337	0.111982	0.335947	132	128	1	3	11.2665	17.828	3.3934	0.707256	0.0396711	261	3	0.223964	255	0.878292	0.0492647
ENST00000318471.5	chr6	780	1	1409	939	68	402	PEX7	TGA	TGAG	16.0135	15.1176	0.895858	0	143	135	8	0	11.3651	16.0997	13.1744	0	0	39	12	0	33	0	0
ENST00000378078.4	chr9	164	1	6973	1143	135	5695	RGP1	TGA	TGAA	18.925	16.6854	2.01568	0.223964	169	149	18	2	2.71404	14.5979	14.931	0.0393265	0.00269399	39	77	0	33	0	0
ENST00000247833.11	chr12	584	1	3645	1350	370	1925	RAB3IP	TGA	TGAT	13.6618	11.9821	1.56775	0.111982	122	107	14	1	3.7481	8.87563	4.23717	0.0581726	0.00655419	24	41	0	18	0	0
ENST00000238823.13	chr2	175	-1	2706	1524	72	1110	FAM98A	TGA	TGAG	149.384	147.145	1.56775	0.671893	1334	1314	14	6	55.2048	96.5516	21.7743	0.605309	0.00626928	48	24	0.111982	42	2.66624	0.0276147
ENST00000294785.10	chr1	1305	1	2777	2097	8	672	NCSTN	TGA	TGAG	111.086	110.974	0	0.111982	992	991	0	1	40.0023	52.9206	0	0.16664	0.00314888	45	9	0	39	0	0
ENST00000367393.8	chr1	1526	1	555	405	14	136	C1orf53	TGA	TGAC	2.23964	2.23964	0	0	20	20	0	0	4.0354	5.52999	0	0	0	51	3	0	45	0	0
ENST00000355946.6	chr10	538	-1	11200	3285	134	7781	SH3PXD2A	TAG	TAGC	15.1176	15.0056	0	0.111982	135	134	0	1	1.34979	4.56792	0	0.0143918	0.00315061	63	88	0	57	0	0
ENST00000353442.9	chr7	815	-1	7952	1440	231	6281	LMBR1	TGA	TGAG	37.962	32.4749	5.0392	0.447929	339	290	45	4	4.77389	22.552	21.8147	0.0713149	0.00316225	141	109	0.111982	135	0.829498	0.0367816
ENST00000377560.9	chr12	786	-1	15714	13218	305	2191	HECTD4	TGA	TGAT	45.4648	44.9049	0.447929	0.111982	406	401	4	1	2.89327	3.39725	1.46862	0.0511101	0.0150445	33	32	0	27	0	0
ENST00000361365.7	chrY	39	1	1294	402	90	802	EIF1AY	TAA	TAAA	5.0392	5.0392	0	0	45	45	0	0	3.89428	12.5353	0	0	0	24	23	0	18	0	0
ENST00000555028.5	chr14	355	1	2731	318	161	2252	LIN52	TAG	TAGC	12.654	12.318	0	0.335947	113	110	0	3	4.63347	38.736	0	0.149177	0.00385112	240	37	0.335947	234	1.43567	0.0370629
ENST00000377636.7	chr13	195	-1	6319	3864	341	2114	TBC1D4	TAA	TAAT	198.657	192.945	5.26317	0.447929	1774	1723	47	4	31.438	49.9341	15.4345	0.211887	0.00424333	90	48	0.111982	84	1.33312	0.0266976
ENST00000304363.9	chr11	701	-1	5673	2625	229	2819	KMT5B	TAA	TAAG	21.0527	20.0448	1.00784	0	188	179	9	0	3.71103	7.63612	4.40105	0	0	75	53	0	69	0	0
ENST00000227524.9	chr11	480	-1	2292	1482	197	613	PRPF19	TAG	TAGG	341.546	311.535	29.5633	0.447929	3050	2782	264	4	149.017	210.212	150.068	0.730716	0.00347609	399	4	0.447929	393	1.13977	0.00542199
ENST00000261739.8	chr12	758	1	4103	1740	160	2203	ANKRD13A	TAG	TAGA	18.2531	18.1411	0.111982	0	163	162	1	0	4.44872	10.4259	0.699889	0	0	297	27	0	291	0	0
ENST00000469796.6	chrX	495	-1	5180	2103	391	2686	ACSL4	TAA	TAAA	122.957	118.589	4.36731	0	1098	1059	39	0	23.7368	56.3905	11.1696	0	0	78	63	0	72	0	0
ENST00000339647.6	chr12	907	-1	2148	2025	61	62	UBC	TAA	TAAG	1847.26	1827.89	16.7973	2.57559	16495	16322	149	23	859.99	902.66	275.366	41.5418	0.0460215	51	1	2.57559	45	57.2354	0.0634075
ENST00000344229.7	chr3	747	1	2821	1113	696	1012	RNF13	TGA	TGAC	33.3707	29.8993	3.35947	0.111982	298	267	30	1	11.8294	26.8637	4.82682	0.110654	0.00411911	33	22	0	27	0	0
ENST00000373327.5	chr2	1115	1	4154	2043	139	1972	TRAF3IP1	TGA	TGAA	13.2139	11.8701	1.11982	0.223964	118	106	10	2	3.18101	5.81014	8.05628	0.113572	0.0195472	78	31	0.111982	72	1.55531	0.267689
ENST00000419333.5	chr3	951	-1	1280	1110	4	166	PCYT1A	TAG	TAGC	44.457	44.345	0.111982	0	397	396	1	0	34.732	39.9504	27.9956	0	0	78	2	0	72	0	0
ENST00000251849.8	chr3	58	-1	3255	1914	434	907	RAF1	TAG	TAGT	37.962	28.7794	8.73462	0.447929	339	257	78	4	11.6627	15.0363	20.1258	0.493858	0.0328444	126	6	0.111982	120	0.933185	0.0620623
ENST00000396705.10	chr12	71	1	1306	717	30	559	TPI1	TGA	TGAG	804.704	803.809	0.335947	0.559911	7186	7178	3	5	616.16	1121.07	11.1982	1.00163	0.000893458	165	7	0.335947	159	2.11287	0.00188469
ENST00000538137.6	chr18	81	-1	4208	3903	192	113	ZNF521	TAG	TAGT	8.1747	7.39083	0.783876	0	73	66	7	0	1.94266	1.89363	4.08269	0	0	113	0	0	107	0	0
[truncated: 6,876 more rows]

## Sheet: Untr_rep2_countTable
#transcript	chrom	featnum	strand	mrnalen	cdslen	utr5len	utr3len	gene_name	stopcodon	stop4nt	mrnaCounts	cdsCounts	utr5Counts	utr3Counts	RAWmrnaCounts	RAWcdsCounts	RAWutr5Counts	RAWutr3Counts	mrnaDensity_rpkm	cdsDensity_rpkm	utr5Density_rpkm	utr3Density_rpkm	utr3_occupancy	utr3LenAdj	inframeStopCount	utr3AdjCounts	utr3LenAdjCalc	utr3AdjDensity_rpkm	RRTS
ENST00000222803.9	chr7	149	-1	4915	603	170	4142	FKBP14	TAG	TAGA	30.8563	21.5994	8.99976	0.257136	120	84	35	1	6.27799	35.8199	52.9398	0.0620802	0.00173312	156	71	0	150	0	0
ENST00000216962.9	chr20	150	1	4071	2499	88	1484	PYGB	TAG	TAGG	78.1694	76.8837	1.02854	0.257136	304	299	4	1	19.2015	30.7658	11.688	0.173272	0.00563198	108	11	0.257136	102	2.52094	0.0819398
ENST00000381352.7	chr12	221	1	2275	1146	316	813	RASSF8	TAG	TAGA	7.19981	5.65699	1.54282	0	28	22	6	0	3.16475	4.93629	4.88233	0	0	39	12	0	33	0	0
ENST00000561312.5	chr15	418	-1	2893	672	31	2190	MESD	TGA	TGAT	60.6841	59.9127	0.257136	0.514272	236	233	1	2	20.9762	89.1558	8.29471	0.234827	0.0026339	204	28	0.257136	198	1.29867	0.0145663
ENST00000587340.5	chr19	1214	-1	2405	1458	690	257	ZSCAN5A	TGA	TGAT	2.05709	2.05709	0	0	8	8	0	0	0.855338	1.4109	0	0	0	42	4	0	36	0	0
ENST00000025301.4	chr13	113	1	9870	5673	170	4027	AKAP11	TAG	TAGA	73.2838	72.7695	0.257136	0.257136	285	283	1	1	7.4249	12.8273	1.51256	0.063853	0.00497788	27	84	0	21	0	0
ENST00000258106.10	chr2	344	1	2143	840	372	931	EMX1	TAG	TAGG	2.57136	2.05709	0.514272	0	10	8	2	0	1.19989	2.44891	1.38245	0	0	294	11	0	288	0	0
ENST00000599962.1	chr21	163	1	415	348	44	23	H2BFS	TAA	TAAA	476.216	472.359	3.85704	0	1852	1837	15	0	1147.51	1357.35	87.66	0	0	23	0	0	17	0	0
ENST00000438911.6	chr8	599	-1	1975	1056	128	791	CYHR1	TAG	TAGG	8.99976	7.71408	1.28568	0	35	30	5	0	4.55684	7.305	10.0444	0	0	429	3	0	423	0	0
ENST00000614428.4	chr17	427	-1	9509	7008	185	2316	ACACA	TAG	TAGG	117.254	114.94	2.31422	0	456	447	9	0	12.3308	16.4012	12.5093	0	0	48	29	0	42	0	0
ENST00000322954.11	chr15	314	-1	6859	4218	145	2496	UACA	TAG	TAGC	45.7702	45.5131	0.257136	0	178	177	1	0	6.67302	10.7902	1.77335	0	0	102	57	0	96	0	0
ENST00000371698.3	chr9	646	1	1237	789	62	386	EGFL7	TGA	TGAC	18.7709	18.5138	0.257136	0	73	72	1	0	15.1746	23.4649	4.14736	0	0	99	1	0	93	0	0
ENST00000403263.6	chr2	909	-1	14083	3051	391	10641	INO80D	TGA	TGAG	6.94267	5.65699	1.28568	0	27	22	5	0	0.492983	1.85414	3.28818	0	0	186	207	0	180	0	0
ENST00000397666.6	chr16	22	-1	681	585	6	90	METTL26	TAG	TAGG	59.1413	58.627	0.514272	0	230	228	2	0	86.8448	100.217	85.712	0	0	78	1	0	72	0	0
ENST00000525680.5	chr11	325	-1	2602	537	223	1842	TP53I11	TAG	TAGT	8.99976	5.91413	3.08563	0	35	23	12	0	3.45879	11.0133	13.8369	0	0	252	21	0	246	0	0
ENST00000474627.8	chr17	260	-1	1508	837	149	522	ATPAF2	TGA	TGAG	12.3425	11.314	1.02854	0	48	44	4	0	8.1847	13.5173	6.90298	0	0	30	8	0	24	0	0
ENST00000335263.9	chr14	503	1	2571	1713	74	784	WDR20	TAG	TAGC	13.8853	12.5997	1.02854	0.257136	54	49	4	1	5.40076	7.35532	13.8992	0.32798	0.0445908	123	9	0	117	0	0
ENST00000484457.5	chr3	134	1	3802	1239	85	2478	FBXL2	TGA	TGAC	8.48549	8.22835	0.257136	0	33	32	1	0	2.23185	6.64112	3.02513	0	0	27	46	0	21	0	0
ENST00000619929.5	chr17	650	-1	6087	2337	99	3651	PLCD3	TGA	TGAG	8.22835	8.22835	0	0	32	32	0	0	1.35179	3.5209	0	0	0	183	35	0	177	0	0
ENST00000371937.8	chr1	602	-1	1782	1023	30	729	ATPAF1	TAG	TAGA	74.0552	74.0552	0	0	288	288	0	0	41.5573	72.3902	0	0	0	27	16	0	21	0	0
ENST00000288532.11	chr12	841	-1	1461	951	11	499	COQ5	TAA	TAAT	33.6848	33.6848	0	0	131	131	0	0	23.056	35.4204	0	0	0	24	16	0	18	0	0
ENST00000373079.3	chrX	407	-1	2594	1488	258	848	NAP1L3	TAA	TAAG	25.1993	24.9422	0.257136	0	98	97	1	0	9.71447	16.7622	0.996651	0	0	84	14	0	78	0	0
ENST00000389629.8	chr15	101	1	4976	2100	6	2870	RTF1	TGA	TGAG	51.4272	50.6558	0	0.771408	200	197	0	3	10.3351	24.1218	0	0.268783	0.0111428	24	50	0	18	0	0
ENST00000263093.7	chr19	1277	-1	2247	2040	31	176	SLC27A5	TGA	TGAT	7.19981	7.19981	0	0	28	28	0	0	3.20419	3.52932	0	0	0	162	1	0	156	0	0
ENST00000305784.7	chr2	1145	-1	1006	606	26	374	DTYMK	TGA	TGAC	64.5411	63.5126	0	1.02854	251	247	0	4	64.1562	104.806	0	2.75012	0.02624	285	5	1.02854	279	3.68654	0.0351748
ENST00000426362.6	chr16	638	-1	920	417	269	234	TXNL4B	TAG	TAGT	10.7997	10.2854	0.514272	0	42	40	2	0	11.7388	24.6653	1.91179	0	0	24	3	0	18	0	0
ENST00000307767.13	chr17	276	1	1831	585	105	1141	TVP23B	TGA	TGAA	14.1425	13.3711	0.771408	0	55	52	3	0	7.72391	22.8565	7.34674	0	0	75	16	0	69	0	0
ENST00000421999.8	chr3	473	1	4257	807	112	3338	CMSS1	TAA	TAAG	72.5124	63.2555	8.99976	0.257136	282	246	35	1	17.0337	78.3835	80.355	0.077033	0.00098277	99	42	0.257136	93	2.7649	0.0352741
ENST00000336498.7	chr4	562	1	3254	2328	233	693	ARHGAP10	TAG	TAGC	13.6282	12.3425	0.771408	0.514272	53	48	3	2	4.18814	5.30177	3.31076	0.742095	0.139971	261	6	0.514272	255	2.01675	0.380392
ENST00000251089.6	chr14	384	-1	5131	1980	107	3044	ANGEL1	TGA	TGAC	47.313	47.313	0	0	184	184	0	0	9.22102	23.8955	0	0	0	147	36	0	141	0	0
ENST00000265000.9	chr4	640	1	4204	1941	19	2244	GALNT7	TAG	TAGA	35.4848	35.2276	0	0.257136	138	137	0	1	8.44072	18.1492	0	0.114588	0.00631367	57	47	0.257136	51	5.04188	0.277802
ENST00000320152.11	chr10	103	-1	1894	645	25	1224	PRTFDC1	TAA	TAAA	22.628	22.628	0	0	88	88	0	0	11.9472	35.0821	0	0	0	111	27	0	105	0	0
ENST00000371703.7	chr10	393	1	2544	774	265	1505	RPP30	TGA	TGAA	87.4263	87.1691	0	0.257136	340	339	0	1	34.3657	112.622	0	0.170855	0.00151707	117	29	0.257136	111	2.31654	0.0205692
ENST00000371927.7	chr10	379	1	4139	1353	952	1834	STAMBPL1	TGA	TGAG	7.45695	3.08563	4.37131	0	29	12	17	0	1.80163	2.28059	4.59172	0	0	30	35	0	24	0	0
ENST00000302764.9	chr5	650	-1	7922	441	46	7435	NUDCD2	TAA	TAAC	26.2279	24.1708	0.771408	1.28568	102	94	3	5	3.31076	54.809	16.7697	0.172923	0.003155	123	163	0.514272	117	4.39549	0.0801964
ENST00000359644.7	chr3	653	1	3356	2817	123	416	ATP2C1	TAA	TAAG	61.9698	60.9412	1.02854	0	241	237	4	0	18.4654	21.6334	8.36215	0	0	96	9	0	90	0	0
ENST00000355841.7	chr5	727	-1	1667	1341	82	244	PDLIM7	TGA	TGAG	39.3418	35.2276	3.85704	0.257136	153	137	15	1	23.6004	26.2697	47.0371	1.05384	0.0401161	36	1	0	30	0	0
ENST00000367888.8	chr1	1366	1	733	357	82	294	MGST3	TAA	TAAA	95.9117	91.2833	4.62845	0	373	355	18	0	130.848	255.696	56.4445	0	0	246	1	0	240	0	0
ENST00000241600.10	chr9	623	1	1413	858	23	532	MRPS2	TGA	TGAT	130.625	128.054	1.02854	1.54282	508	498	4	6	92.4452	149.247	44.7193	2.90003	0.0194311	213	4	1.28568	207	6.21102	0.0416157
ENST00000376834.8	chr9	242	-1	4214	1197	46	2971	CARNMT1	TAA	TAAT	40.3704	38.3133	1.54282	0.514272	157	149	6	2	9.58006	32.0077	33.5395	0.173097	0.00540798	51	73	0	45	0	0
ENST00000596362.1	chr19	915	1	1158	417	130	611	CALM3	TGA	TGAA	130.625	129.854	0	0.771408	508	505	0	3	112.802	311.4	0	1.26253	0.00405438	111	4	0.257136	105	2.44891	0.00786422
ENST00000369851.6	chr1	888	1	27128	1032	100	25996	GNAI3	TGA	TGAG	167.653	161.224	6.17127	0.257136	652	627	24	1	6.18006	156.225	61.7127	0.00989137	6.33149e-05	126	452	0	120	0	0
ENST00000434353.6	chrX	668	1	1479	408	561	510	CXorf40A	TAG	TAGA	28.7992	3.85704	24.6851	0.257136	112	15	96	1	19.4721	9.45353	44.0019	0.504188	0.0533333	69	3	0	63	0	0
ENST00000374987.4	chrX	278	1	3194	1524	54	1616	APEX2	TGA	TGAA	56.3128	56.3128	0	0	219	219	0	0	17.6308	36.9507	0	0	0	72	28	0	66	0	0
ENST00000357495.4	chr13	174	1	1327	930	62	335	HNRNPA1L2	TAA	TAAT	126.511	124.711	1.54282	0.257136	492	485	6	1	95.336	134.098	24.8841	0.76757	0.00572396	18	10	0	12	0	0
ENST00000318158.11	chr9	184	1	1205	954	49	202	GRHPR	TAG	TAGC	88.4548	86.1406	2.05709	0.257136	344	335	8	1	73.4065	90.2941	41.9814	1.27295	0.0140978	69	4	0.257136	63	4.08152	0.0452026
ENST00000614681.1	chr2	583	1	1302	684	133	485	INSIG2	TGA	TGAA	8.99976	7.97122	0.771408	0.257136	35	31	3	1	6.91226	11.6538	5.80006	0.530177	0.0454938	99	12	0	93	0	0
ENST00000328434.8	chr17	592	-1	735	288	17	430	COA3	TAA	TAAT	102.083	101.312	0	0.771408	397	394	0	3	138.888	351.776	0	1.79397	0.00509975	66	8	0.257136	60	4.2856	0.0121827
ENST00000225983.10	chr17	624	-1	5281	3339	318	1624	HDAC5	TGA	TGAC	12.0854	10.2854	1.79995	0	47	40	7	0	2.28847	3.0804	5.66023	0	0	60	9	0	54	0	0
ENST00000313552.10	chr2	1146	1	5151	690	20	4441	ING5	TAG	TAGG	17.2281	16.971	0	0.257136	67	66	0	1	3.34462	24.5956	0	0.0579005	0.0023541	36	56	0	30	0	0
ENST00000558966.5	chr15	148	1	1850	1368	119	363	CTDSPL2	TAA	TAAG	26.2279	25.7136	0.514272	0	102	100	2	0	14.1772	18.7965	4.32161	0	0	84	6	0	78	0	0
ENST00000285930.9	chr7	659	-1	1316	918	32	366	AKR1B1	TGA	TGAA	298.792	298.278	0.514272	0	1162	1160	2	0	227.046	324.921	16.071	0	0	30	7	0	24	0	0
ENST00000566625.2	chr16	375	1	2370	126	39	2205	ZNF771	TAG	TAGA	2.05709	1.54282	0.514272	0	8	6	2	0	0.86797	12.2446	13.1865	0	0	81	21	0	75	0	0
ENST00000292577.11	chr19	62	-1	1712	900	428	384	ABHD17A	TAG	TAGC	6.17127	2.31422	3.85704	0	24	9	15	0	3.60471	2.57136	9.01178	0	0	33	4	0	27	0	0
ENST00000321407.3	chr7	611	-1	4083	2295	408	1380	GCC1	TGA	TGAT	21.8566	18.5138	3.08563	0.257136	85	72	12	1	5.35306	8.06701	7.56282	0.18633	0.0230978	246	25	0	240	0	0
ENST00000413459.7	chr16	103	1	2004	1752	63	189	AMDHD2	TGA	TGAG	12.5997	12.5997	0	0	49	49	0	0	6.28726	7.19159	0	0	0	99	2	0	93	0	0
ENST00000270357.10	chr2	1126	1	5716	2145	97	3474	RNPEPL1	TAG	TAGC	5.65699	4.37131	1.28568	0	22	17	5	0	0.989677	2.03791	13.2544	0	0	72	44	0	66	0	0
ENST00000367287.5	chr1	1553	1	1605	483	18	1104	TIMM17A	TAG	TAGG	146.825	146.053	0.257136	0.514272	571	568	1	2	91.4796	302.388	14.2853	0.465826	0.00154049	120	23	0.514272	114	4.51116	0.0149185
ENST00000261366.10	chr5	377	1	2845	1728	367	750	LMNB1	TAA	TAAA	363.076	329.648	32.9134	0.514272	1412	1282	128	2	127.619	190.769	89.6823	0.685696	0.00359438	27	16	0	21	0	0
ENST00000628904.2	chr2	701	1	3811	3594	121	96	PKP4	TGA	TGAA	20.5709	19.5423	1.02854	0	80	76	4	0	5.39777	5.43749	8.50037	0	0	36	3	0	30	0	0
ENST00000262613.10	chr17	900	1	1948	1044	213	691	SLC9A3R1	TGA	TGAG	49.3701	39.8561	9.51403	0	192	155	37	0	25.344	38.1763	44.6668	0	0	366	3	0	360	0	0
ENST00000621654.1	chr17	445	-1	3674	1107	920	1647	EPOP	TGA	TGAC	3.08563	1.54282	1.54282	0	12	6	6	0	0.839856	1.39369	1.67697	0	0	57	17	0	51	0	0
ENST00000354429.6	chr17	130	1	1259	918	101	240	ELP5	TGA	TGAC	51.1701	49.113	2.05709	0	199	191	8	0	40.6434	53.5	20.3672	0	0	18	3	0	12	0	0
ENST00000396048.6	chr3	207	1	3054	783	431	1840	ZNF501	TAA	TAAA	2.57136	2.05709	0.514272	0	10	8	2	0	0.841965	2.62719	1.19321	0	0	75	35	0	69	0	0
ENST00000575403.5	chr17	283	-1	883	411	328	144	B9D1	TGA	TGAA	19.5423	19.2852	0.257136	0	76	75	1	0	22.1318	46.9226	0.783951	0	0	27	3	0	21	0	0
ENST00000253496.3	chr5	723	-1	2004	1815	43	146	F12	TGA	TGAT	3.5999	3.34277	0	0.257136	14	13	0	1	1.79636	1.84175	0	1.76121	0.95627	33	2	0	27	0	0
ENST00000503569.5	chr4	63	1	3210	2640	161	409	WFS1	TGA	TGAG	41.1418	39.0847	2.05709	0	160	152	8	0	12.8168	14.8048	12.7769	0	0	42	4	0	36	0	0
ENST00000304430.9	chr4	501	-1	1124	918	28	178	NUDT6	TAA	TAAA	4.88558	4.88558	0	0	19	19	0	0	4.34661	5.32199	0	0	0	30	7	0	24	0	0
ENST00000485511.6	chr6	418	1	2928	1776	102	1050	PPP2R5D	TGA	TGAC	92.0547	88.9691	0.771408	2.31422	358	346	3	9	31.4394	50.0952	7.56282	2.20402	0.0439967	225	10	1.28568	219	5.87069	0.117191
ENST00000480567.5	chr1	1218	-1	850	519	157	174	SSR2	TGA	TGAT	229.622	228.08	1.28568	0.257136	893	887	5	1	270.144	439.46	8.18905	1.47779	0.00336275	90	4	0.257136	84	3.06114	0.0069657
ENST00000393860.7	chr17	568	-1	1867	618	450	799	RAB5C	TGA	TGAG	91.2833	81.255	10.0283	0	355	316	39	0	48.893	131.481	22.2851	0	0	45	6	0	39	0	0
ENST00000256441.5	chr5	195	1	1270	279	64	927	MRPS36	TAA	TAAC	38.5704	37.799	0.771408	0	150	147	3	0	30.3704	135.48	12.0533	0	0	33	22	0	27	0	0
ENST00000327532.7	chr3	686	-1	3447	2271	356	820	DZIP1L	TGA	TGAT	3.34277	3.34277	0	0	13	13	0	0	0.969762	1.47194	0	0	0	33	13	0	27	0	0
ENST00000380258.6	chr15	262	-1	866	165	67	634	PCLAF	TAA	TAAC	80.2264	75.598	4.62845	0	312	294	18	0	92.6402	458.17	69.0813	0	0	45	10	0	39	0	0
ENST00000392876.8	chr12	705	-1	7199	1614	72	5513	NT5DC3	TAG	TAGC	15.171	14.9139	0	0.257136	59	58	0	1	2.10738	9.24033	0	0.0466418	0.00504763	36	110	0	30	0	0
ENST00000232888.7	chr3	337	-1	1497	1395	31	71	RRP9	TGA	TGAC	65.5697	65.3126	0	0.257136	255	254	0	1	43.8007	46.819	0	3.62163	0.0773539	71	0	0.257136	65	3.95594	0.0844942
ENST00000428879.5	chr2	676	-1	1681	858	499	324	MMADHC	TAG	TAGC	133.711	130.111	3.5999	0	520	506	14	0	79.5424	151.644	7.21424	0	0	39	7	0	33	0	0
ENST00000314128.9	chr12	490	-1	4360	2523	51	1786	STAT2	TAG	TAGG	17.9995	17.9995	0	0	70	70	0	0	4.12833	7.13417	0	0	0	54	27	0	48	0	0
ENST00000396825.4	chr20	280	-1	4583	756	48	3779	FITM2	TAA	TAAA	13.3711	13.3711	0	0	52	52	0	0	2.91754	17.6866	0	0	0	66	69	0	60	0	0
ENST00000606937.5	chr5	379	-1	562	384	41	137	C5orf63	TGA	TGAA	3.5999	3.34277	0.257136	0	14	13	1	0	6.40552	8.70513	6.27161	0	0	24	3	0	18	0	0
ENST00000265038.9	chr5	170	-1	1972	1158	37	777	ERCC8	TGA	TGAA	9.2569	8.22835	1.02854	0	36	32	4	0	4.69417	7.10566	27.7985	0	0	33	10	0	27	0	0
ENST00000371317.10	chrX	547	1	9532	513	130	8889	MCTS1	TGA	TGAG	165.338	156.082	9.2569	0	643	607	36	0	17.3456	304.253	71.2069	0	0	27	192	0	21	0	0
ENST00000456936.4	chr5	346	-1	3873	642	238	2993	TMED7	TAA	TAAC	80.2264	58.627	20.828	0.771408	312	228	81	3	20.7143	91.3193	87.5127	0.257737	0.00282238	18	69	0	12	0	0
ENST00000627148.2	chr6	589	-1	965	318	395	252	CGA	TAA	TAAA	0.514272	0.514272	0	0	2	2	0	0	0.532924	1.61721	0	0	0	24	6	0	18	0	0
ENST00000322810.8	chr8	573	-1	15204	14022	164	1018	PLEC	TGA	TGAG	71.2267	70.9695	0	0.257136	277	276	0	1	4.68473	5.0613	0	0.252589	0.049906	114	7	0.257136	108	2.38089	0.470411
ENST00000374198.4	chr9	414	1	2742	1536	96	1110	PRPF4	TAG	TAGA	79.9693	79.455	0.257136	0.257136	311	309	1	1	29.1646	51.7285	2.6785	0.231654	0.00447826	72	14	0	66	0	0
ENST00000396056.7	chr3	205	1	2613	1551	224	838	ZNF35	TAA	TAAC	13.8853	7.71408	6.17127	0	54	30	24	0	5.31395	4.97362	27.5503	0	0	54	15	0	48	0	0
ENST00000219479.7	chr16	15	1	955	531	18	406	NME4	TGA	TGAG	24.6851	24.1708	0.257136	0.257136	96	94	1	1	25.8482	45.5194	14.2853	0.63334	0.0139136	288	3	0.257136	282	0.91183	0.0200317
ENST00000193322.8	chr6	653	-1	4426	972	84	3370	OSTM1	TGA	TGAG	20.3137	20.0566	0.257136	0	79	78	1	0	4.58964	20.6344	3.06114	0	0	138	66	0	132	0	0
ENST00000221856.11	chr19	132	1	1788	1458	143	187	FSD1	TAG	TAGG	13.8853	12.8568	1.02854	0	54	50	4	0	7.76585	8.81811	7.19262	0	0	187	0	0	181	0	0
ENST00000631589.1	chr10	90	1	4910	3174	95	1641	MLLT10	TGA	TGAC	10.2854	10.0283	0.257136	0	40	39	1	0	2.09479	3.15952	2.7067	0	0	18	32	0	12	0	0
ENST00000247986.2	chr1	251	-1	3924	3057	305	562	KIF17	TGA	TGAG	5.65699	5.65699	0	0	22	22	0	0	1.44164	1.8505	0	0	0	39	4	0	33	0	0
ENST00000373449.6	chr1	428	-1	3541	666	36	2839	AK2	TAG	TAGT	180.51	177.681	2.8285	0	702	691	11	0	50.977	266.788	78.5693	0	0	51	39	0	45	0	0
ENST00000646620.1	chr15	486	-1	1264	507	406	351	HDDC3	TGA	TGAT	22.3708	22.1137	0.257136	0	87	86	1	0	17.6984	43.6168	0.63334	0	0	213	5	0	207	0	0
ENST00000263707.6	chr2	600	-1	9242	1407	87	7748	TFCP2L1	TGA	TGAG	2.31422	2.31422	0	0	9	9	0	0	0.250403	1.64479	0	0	0	60	89	0	54	0	0
ENST00000374878.5	chrX	300	-1	2172	1431	395	346	ARHGEF9	TAA	TAAG	2.57136	2.57136	0	0	10	10	0	0	1.18387	1.7969	0	0	0	90	8	0	84	0	0
ENST00000543824.5	chr12	111	1	4247	2982	326	939	PHC1	TAA	TAAG	8.74263	7.71408	1.02854	0	34	30	4	0	2.05854	2.58688	3.15504	0	0	186	8	0	180	0	0
ENST00000264156.3	chr2	657	-1	3708	2433	72	1203	MCM6	TGA	TGAG	394.704	391.875	2.57136	0.257136	1535	1524	10	1	106.447	161.067	35.7133	0.213746	0.00132706	18	25	0	12	0	0
ENST00000522232.2	chr5	616	1	1946	585	19	1342	PPP1R2B	TAG	TAGA	6.17127	6.17127	0	0	24	24	0	0	3.17126	10.5492	0	0	0	138	31	0	132	0	0
ENST00000281950.8	chr2	195	1	3660	471	85	3104	GEMIN6	TGA	TGAG	66.3411	54.2557	11.5711	0.514272	258	211	45	2	18.126	115.193	136.131	0.16568	0.00143829	66	52	0.514272	60	8.5712	0.0744076
ENST00000356392.9	chr19	309	-1	2078	1755	99	224	CCDC151	TAG	TAGA	2.31422	2.05709	0.257136	0	9	8	1	0	1.11368	1.17213	2.59733	0	0	171	1	0	165	0	0
ENST00000270221.11	chr19	953	1	604	459	68	77	EMP3	TGA	TGAG	7.45695	6.94267	0.514272	0	29	27	2	0	12.3459	15.1256	7.56282	0	0	69	1	0	63	0	0
ENST00000212015.11	chr10	242	1	4062	2211	60	1791	SIRT1	TAG	TAGT	56.8271	56.5699	0	0.257136	221	220	0	1	13.9899	25.5857	0	0.143571	0.00561139	129	38	0	123	0	0
ENST00000317506.8	chr16	574	-1	5200	1830	18	3352	RANBP10	TAG	TAGC	15.9424	15.9424	0	0	62	62	0	0	3.06585	8.71171	0	0	0	249	48	0	243	0	0
ENST00000261700.8	chr14	210	1	6962	702	88	6172	RTRAF	TGA	TGAA	187.709	187.452	0	0.257136	730	729	0	1	26.962	267.026	0	0.0416617	0.000156021	33	129	0	27	0	0
ENST00000249636.10	chr15	302	1	8070	1923	142	6005	PIAS1	TGA	TGAT	58.1127	58.1127	0	0	226	226	0	0	7.20108	30.2198	0	0	0	195	125	0	189	0	0
ENST00000263150.8	chr10	7	1	4417	1452	145	2820	WDR37	TAA	TAAG	10.7997	10.0283	0.771408	0	42	39	3	0	2.44503	6.90655	5.32006	0	0	48	37	0	42	0	0
ENST00000319420.3	chr13	37	-1	2815	855	50	1910	SHISA2	TAA	TAAC	3.08563	3.08563	0	0	12	12	0	0	1.09614	3.60893	0	0	0	30	40	0	24	0	0
ENST00000335255.10	chr17	1055	1	5198	1950	151	3097	FOXK2	TAG	TAGC	32.9134	31.1135	1.54282	0.257136	128	121	6	1	6.33194	15.9556	10.2173	0.0830275	0.00520365	153	39	0.257136	147	1.74922	0.109631
ENST00000505354.2	chr4	623	-1	1823	1629	28	166	GK3P	TAA	TAAA	4.62845	4.62845	0	0	18	18	0	0	2.53892	2.84128	0	0	0	45	5	0	39	0	0
ENST00000372836.4	chr6	415	1	1659	804	365	490	CNPY3	TGA	TGAG	23.3994	19.0281	4.37131	0	91	74	17	0	14.1045	23.6668	11.9762	0	0	270	1	0	264	0	0
ENST00000308521.10	chr22	258	1	4451	1089	91	3271	APOBEC3F	TGA	TGAG	5.39986	4.11418	1.02854	0.257136	21	16	4	1	1.21318	3.77794	11.3027	0.0786108	0.0208079	36	49	0	30	0	0
ENST00000313143.9	chr3	870	1	5224	2118	253	2853	DVL3	TGA	TGAG	26.7421	23.1422	3.08563	0.514272	104	90	12	2	5.11909	10.9265	12.1962	0.180257	0.0164973	327	42	0.257136	321	0.801047	0.0733126
ENST00000216489.8	chr14	400	-1	2552	1137	13	1402	ALKBH1	TGA	TGAG	34.4562	34.1991	0	0.257136	134	133	0	1	13.5017	30.0784	0	0.183407	0.00609763	192	24	0.257136	186	1.38245	0.0459617
ENST00000323468.10	chr11	918	-1	4208	1491	12	2705	KDELC2	TGA	TGAG	51.9415	51.9415	0	0	202	202	0	0	12.3435	34.8367	0	0	0	102	53	0	96	0	0
ENST00000221980.5	chr19	274	1	2984	2742	86	156	ICAM5	TGA	TGAG	3.08563	3.08563	0	0	12	12	0	0	1.03406	1.12532	0	0	0	156	0	0	150	0	0
ENST00000354371.7	chr2	1100	1	3393	597	70	2726	COPS8	TGA	TGAT	79.9693	78.4265	1.28568	0.257136	311	305	5	1	23.5689	131.368	18.3669	0.0943272	0.00071804	96	59	0	90	0	0
ENST00000564845.5	chr16	459	1	11459	8613	296	2550	CHD9	TGA	TGAT	27.2564	26.7421	0.514272	0	106	104	2	0	2.3786	3.10486	1.73741	0	0	27	61	0	21	0	0
ENST00000444614.8	chr13	119	-1	2014	789	303	922	CCDC122	TAA	TAAC	5.91413	4.88558	0.771408	0.257136	23	19	3	1	2.93651	6.19212	2.5459	0.278889	0.0450394	63	20	0.257136	57	4.51116	0.728532
ENST00000586895.5	chr19	261	1	387	189	98	100	UBL5	TAG	TAGA	221.651	205.195	13.3711	3.08563	862	798	52	12	572.742	1085.69	136.44	30.8563	0.0284211	63	3	2.31422	57	40.6004	0.0373961
ENST00000620429.4	chr11	1010	1	2694	1422	1199	73	VPS11	TAG	TAGC	21.0852	9.2569	11.8283	0	82	36	46	0	7.82671	6.50977	9.8651	0	0	63	1	0	57	0	0
ENST00000380243.9	chr14	485	-1	16519	1227	242	15050	CCDC85C	TAG	TAGG	22.1137	19.2852	2.31422	0.514272	86	75	9	2	1.33868	15.7174	9.56291	0.0341709	0.00217409	114	190	0	108	0	0
ENST00000496811.6	chr3	769	-1	6678	2994	65	3619	DHX36	TGA	TGAC	155.824	153.767	0	2.05709	606	598	0	8	23.334	51.3585	0	0.568413	0.0110676	108	69	2.05709	102	20.1675	0.392681
ENST00000308683.3	chr5	53	-1	1662	1401	129	132	ZNF622	TGA	TGAG	50.9129	48.0844	2.8285	0	198	187	11	0	30.6335	34.3215	21.9263	0	0	54	2	0	48	0	0
ENST00000378572.8	chr10	57	1	1625	996	116	513	PRPF18	TGA	TGAG	16.1996	13.3711	2.8285	0	63	52	11	0	9.96897	13.4248	24.3836	0	0	21	15	0	15	0	0
ENST00000300289.10	chr15	141	1	3635	1485	96	2054	PDIA3	TAA	TAAA	388.275	381.076	1.79995	5.39986	1510	1482	6	21	106.816	256.617	18.7495	2.62895	0.0102446	129	37	4.88558	123	39.7202	0.154784
ENST00000337080.8	chr19	1210	1	1898	951	261	686	ZNF444	TAG	TAGC	25.9707	21.0852	4.88558	0	101	82	19	0	13.6832	22.1716	18.7187	0	0	255	7	0	249	0	0
ENST00000342502.6	chr12	675	-1	1600	1020	406	174	IKBIP	TAG	TAGT	28.0278	25.7136	2.31422	0	109	100	9	0	17.5174	25.2094	5.70006	0	0	30	8	0	24	0	0
ENST00000353487.7	chr12	848	-1	4090	1122	485	2483	SPPL3	TGA	TGAT	31.3706	22.8851	8.48549	0	122	89	33	0	7.67007	20.3967	17.4959	0	0	36	37	0	30	0	0
ENST00000645843.1	chr4	511	1	5782	1362	312	4108	ABHD18	TAG	TAGT	23.9137	20.5709	3.08563	0.257136	93	80	12	1	4.13588	15.1034	9.88985	0.062594	0.00414435	18	82	0	12	0	0
ENST00000334690.11	chr4	665	1	4478	3369	170	939	TRAPPC11	TGA	TGAT	31.3706	30.3421	1.02854	0	122	118	4	0	7.00549	9.00625	6.05026	0	0	69	19	0	63	0	0
ENST00000405260.5	chr2	1135	-1	4897	3939	693	265	PASK	TAA	TAAA	34.1991	33.4277	0.771408	0	133	130	3	0	6.98368	8.48634	1.11314	0	0	87	5	0	81	0	0
ENST00000337975.6	chr15	452	-1	3605	1737	164	1704	KLHL25	TGA	TGAG	15.4282	14.9139	0.257136	0.257136	60	58	1	1	4.27966	8.58601	1.5679	0.150901	0.0175753	165	15	0	159	0	0
ENST00000551736.5	chr12	274	1	1639	1350	107	182	IRAK4	TAA	TAAA	6.68554	6.68554	0	0	26	26	0	0	4.07903	4.95225	0	0	0	24	4	0	18	0	0
ENST00000361891.9	chr1	1156	-1	1807	1140	65	602	ILF2	TGA	TGAC	733.609	727.181	4.88558	1.54282	2853	2828	19	6	405.982	637.878	75.1628	2.56282	0.00401773	48	11	0.514272	42	12.2446	0.0191958
ENST00000251108.10	chr13	150	1	3341	1512	107	1722	CDADC1	TAA	TAAG	5.65699	4.11418	1.54282	0	22	16	6	0	1.6932	2.72102	14.4188	0	0	54	29	0	48	0	0
ENST00000504548.3	chr8	561	1	5345	1896	63	3386	TIGD5	TGA	TGAC	22.628	22.3708	0	0.257136	88	87	0	1	4.23348	11.799	0	0.0759409	0.00643624	942	26	0.257136	936	0.274718	0.0232832
ENST00000589666.6	chr17	936	1	3845	2400	69	1376	UNK	TGA	TGAC	17.4853	17.2281	0	0.257136	68	67	0	1	4.54753	7.17838	0	0.186872	0.0260326	72	15	0.257136	66	3.896	0.542741
ENST00000372771.5	chr1	503	1	6187	5712	7	468	RLF	TAA	TAAG	46.0274	45.7702	0	0.257136	179	178	0	1	7.43937	8.01299	0	0.549436	0.0685681	18	12	0.257136	12	21.428	2.67416
ENST00000397382.8	chr14	70	-1	1941	1584	277	80	C14orf93	TAA	TAAA	4.37131	3.5999	0.771408	0	17	14	3	0	2.25209	2.27267	2.78487	0	0	80	0	0	74	0	0
ENST00000421239.7	chr19	1104	1	6723	1740	261	4722	ZNF578	TAG	TAGA	2.05709	1.79995	0	0.257136	8	7	0	1	0.305978	1.03446	0	0.0544549	0.0526411	33	79	0	27	0	0
ENST00000482354.5	chrX	57	1	1825	1428	68	329	MOSPD2	TAA	TAAG	19.0281	17.4853	1.54282	0	74	68	6	0	10.4263	12.2446	22.6885	0	0	57	10	0	51	0	0
ENST00000332585.11	chr22	163	1	4216	2718	30	1468	OSBP2	TGA	TGAG	6.17127	6.17127	0	0	24	24	0	0	1.46377	2.27052	0	0	0	57	18	0	51	0	0
ENST00000399218.8	chr18	102	-1	6988	2595	50	4343	GAREM1	TAG	TAGC	10.7997	10.7997	0	0	42	42	0	0	1.54547	4.16174	0	0	0	51	82	0	45	0	0
ENST00000379485.1	chr13	106	-1	5133	1992	229	2912	KBTBD6	TGA	TGAA	61.1984	56.5699	4.37131	0.257136	238	220	17	1	11.9225	28.3986	19.0887	0.0883022	0.00310939	30	66	0	24	0	0
ENST00000442287.6	chr15	463	-1	4442	3687	330	425	POLG	TAG	TAGC	59.1413	51.9415	7.19981	0	230	202	28	0	13.3141	14.0877	21.8176	0	0	105	5	0	99	0	0
ENST00000257215.10	chr11	501	1	5754	3096	152	2506	DAGLA	TAG	TAGC	5.14272	4.62845	0.514272	0	20	18	2	0	0.893765	1.49498	3.38337	0	0	87	20	0	81	0	0
ENST00000378887.3	chr19	640	1	1072	315	70	687	SDHAF1	TGA	TGAC	7.71408	7.19981	0.257136	0.257136	30	28	1	1	7.19597	22.8565	3.67337	0.374288	0.0163755	90	7	0.257136	84	3.06114	0.133929
ENST00000302190.9	chr8	402	1	3262	573	453	2236	SDC2	TAA	TAAA	61.9698	48.3416	13.1139	0.514272	241	188	51	2	18.9975	84.3658	28.9491	0.229996	0.00272618	51	47	0.257136	45	5.71413	0.0677305
ENST00000506380.5	chr4	55	1	753	525	186	42	NSG1	TAG	TAGC	2.8285	2.57136	0.257136	0	11	10	1	0	3.7563	4.89783	1.38245	0	0	42	0	0	36	0	0
ENST00000397411.6	chr11	39	1	980	684	115	181	TSPAN4	TAG	TAGG	6.94267	6.17127	0.771408	0	27	24	3	0	7.08436	9.02232	6.7079	0	0	165	1	0	159	0	0
ENST00000393114.7	chr7	665	-1	1437	441	176	820	CYREN	TAG	TAGG	30.8563	15.171	12.5997	3.08563	120	59	49	12	21.4727	34.4014	71.589	3.76297	0.109384	192	7	1.79995	186	9.67716	0.281301
ENST00000428984.6	chr15	16	-1	2941	2526	390	25	UBE3A	TAA	TAAA	49.113	46.2845	2.8285	0	191	180	11	0	16.6994	18.3232	7.25256	0	0	25	0	0	19	0	0
ENST00000330062.7	chr15	474	-1	2649	1326	108	1215	IDH2	TAG	TAGG	32.6563	32.6563	0	0	127	127	0	0	12.3278	24.6277	0	0	0	126	17	0	120	0	0
ENST00000356853.9	chr2	990	-1	2049	867	128	1054	NHEJ1	TAA	TAAT	28.285	26.9993	1.28568	0	110	105	5	0	13.8043	31.141	10.0444	0	0	96	13	0	90	0	0
ENST00000369902.7	chr10	518	1	4956	1422	160	3374	SUFU	TAG	TAGC	31.6277	30.0849	1.54282	0	123	117	6	0	6.38171	21.1568	9.6426	0	0	108	30	0	102	0	0
ENST00000357122.8	chr17	747	-1	4716	3891	203	622	SPAG9	TGA	TGAG	110.826	109.797	1.02854	0	431	427	4	0	23.4999	28.2182	5.06672	0	0	75	13	0	69	0	0
ENST00000266039.7	chr3	321	-1	5431	3405	168	1858	CACNA2D2	TGA	TGAG	9.51403	9.2569	0.257136	0	37	36	1	0	1.7518	2.71862	1.53057	0	0	132	16	0	126	0	0
ENST00000375442.8	chrX	260	1	2770	2049	126	595	TSPYL2	TAA	TAAG	16.1996	15.9424	0.257136	0	63	62	1	0	5.84822	7.78059	2.04076	0	0	345	1	0	339	0	0
ENST00000407249.7	chr1	41	-1	2632	2355	106	171	CDK11B	TGA	TGAA	30.8563	30.8563	0	0	120	120	0	0	11.7235	13.1025	0	0	0	138	1	0	132	0	0
ENST00000370398.5	chr6	541	1	6300	2766	103	3431	KCNQ5	TAA	TAAG	5.91413	5.91413	0	0	23	23	0	0	0.938751	2.13815	0	0	0	57	67	0	51	0	0
ENST00000269260.7	chr17	70	1	1733	1197	84	452	ARRB2	TAG	TAGG	33.1706	32.9134	0	0.257136	129	128	0	1	19.1405	27.4966	0	0.568885	0.0206893	45	4	0.257136	39	6.59323	0.239784
ENST00000279907.12	chr12	679	-1	5153	4362	233	558	UHRF1BP1L	TAG	TAGC	31.3706	26.2279	5.14272	0	122	102	20	0	6.08783	6.01281	22.0718	0	0	30	12	0	24	0	0
ENST00000341653.6	chr14	292	-1	285	219	42	24	MAX	TAA	TAAT	18.7709	15.9424	2.8285	0	73	62	11	0	65.8629	72.7965	67.3452	0	0	18	1	0	12	0	0
ENST00000398073.7	chr12	539	-1	4740	783	288	3669	CTDSP2	TAG	TAGC	15.6853	8.22835	6.4284	1.02854	61	32	25	4	3.30913	10.5088	22.3208	0.280334	0.0266762	72	47	0	66	0	0
ENST00000395284.7	chr10	227	1	1868	861	136	871	CDK1	TAG	TAGC	267.679	237.594	28.285	1.79995	1041	924	109	7	143.297	275.951	207.978	2.06654	0.00748878	126	21	1.02854	120	8.5712	0.0310606
ENST00000280020.10	chr18	122	1	4808	1701	6	3101	KIAA1328	TGA	TGAC	6.4284	6.4284	0	0	25	25	0	0	1.33702	3.77919	0	0	0	21	37	0	15	0	0
ENST00000370630.6	chr1	769	-1	6526	1125	19	5382	CTBS	TGA	TGAA	7.45695	7.45695	0	0	29	29	0	0	1.14265	6.6284	0	0	0	120	131	0	114	0	0
ENST00000555761.5	chr14	401	-1	1810	1683	23	104	SNW1	TGA	TGAA	130.625	130.368	0	0.257136	508	507	0	1	72.1686	77.4617	0	2.47246	0.0319185	104	0	0.257136	98	2.62384	0.0338727
ENST00000406438.5	chr17	269	1	8252	2781	491	4980	SMCR8	TGA	TGAG	19.2852	17.4853	1.79995	0	75	68	7	0	2.33703	6.2874	3.66589	0	0	21	75	0	15	0	0
ENST00000298295.3	chr10	163	-1	2075	606	212	1257	DEPP1	TGA	TGAC	4.11418	3.5999	0.514272	0	16	14	2	0	1.98274	5.94044	2.42581	0	0	159	21	0	153	0	0
ENST00000333602.12	chr3	947	-1	4431	3084	537	810	TNK2	TGA	TGAG	8.48549	6.68554	1.54282	0.257136	33	26	6	1	1.91503	2.16781	2.87303	0.317452	0.146439	45	6	0	39	0	0
ENST00000258975.7	chr17	825	1	1401	861	183	357	TACO1	TAA	TAAC	64.0269	51.1701	12.8568	0	249	199	50	0	45.7008	59.431	70.2558	0	0	33	8	0	27	0	0
ENST00000535621.6	chr16	219	1	2003	1464	182	357	PDXDC1	TGA	TGAG	40.8846	40.1132	0.771408	0	159	156	3	0	20.4117	27.3997	4.23851	0	0	81	5	0	75	0	0
ENST00000219302.7	chr16	64	-1	1024	477	190	357	NME3	TAG	TAGC	33.6848	32.3991	1.02854	0.257136	131	126	4	1	32.8953	67.9227	5.41339	0.720269	0.0106042	342	1	0.257136	336	0.765286	0.011267
ENST00000406652.5	chr2	208	1	5439	1581	316	3542	MTA3	TGA	TGAG	36.5133	32.9134	3.5999	0	142	128	14	0	6.71324	20.8181	11.3921	0	0	51	26	0	45	0	0
ENST00000298289.6	chr14	187	-1	701	288	154	259	RPL36AL	TAA	TAAA	135.768	100.026	34.7134	1.02854	528	389	135	4	193.677	347.312	225.411	3.97121	0.0114341	42	2	0.514272	36	14.2853	0.0411311
ENST00000450142.7	chr12	616	-1	5575	3060	160	2355	PPP1R12A	TAA	TAAA	63.2555	62.2269	1.02854	0	246	242	4	0	11.3463	20.3356	6.4284	0	0	213	50	0	207	0	0
ENST00000358697.5	chrX	298	-1	4068	2367	394	1307	ZXDA	TGA	TGAA	7.45695	7.45695	0	0	29	29	0	0	1.83307	3.15038	0	0	0	33	28	0	27	0	0
ENST00000222122.9	chr19	965	-1	2184	945	438	801	DBP	TGA	TGAG	15.4282	6.4284	8.99976	0	60	25	35	0	7.06418	6.80254	20.5474	0	0	267	12	0	261	0	0
ENST00000262306.11	chr16	109	-1	537	453	32	52	ELOB	TAA	TAAT	177.681	177.424	0.257136	0	691	690	1	0	330.877	391.664	8.0355	0	0	39	2	0	33	0	0
ENST00000617859.4	chr10	629	-1	4497	1227	304	2966	IKZF5	TGA	TGAT	7.97122	4.62845	3.34277	0	31	18	13	0	1.77256	3.77217	10.9959	0	0	195	57	0	189	0	0
ENST00000320776.4	chr4	70	1	1572	621	149	802	BLOC1S4	TGA	TGAC	19.7995	19.2852	0.257136	0.257136	77	75	1	1	12.5951	31.0551	1.72575	0.320619	0.0103242	60	21	0.257136	54	4.76178	0.153333
ENST00000405938.5	chr22	116	-1	2851	2481	349	21	TFIP11	TGA	TGAA	64.0269	55.0271	8.99976	0	249	214	35	0	22.4577	22.1794	25.7873	0	0	21	0	0	15	0	0
ENST00000268182.10	chr15	480	1	7160	4941	94	2125	IQGAP1	TAA	TAAT	104.654	103.112	1.02854	0.514272	407	401	4	2	14.6165	20.8686	10.942	0.24201	0.0115969	186	33	0	180	0	0
ENST00000376945.3	chr13	219	-1	2733	798	344	1591	SOX21	TGA	TGAC	10.5426	6.4284	3.85704	0.257136	41	25	15	1	3.85751	8.05564	11.2123	0.161619	0.0200629	138	21	0.257136	132	1.948	0.241818
ENST00000260753.8	chr10	391	1	6261	5310	66	885	KIF20B	TAA	TAAA	98.4831	98.226	0.257136	0	383	382	1	0	15.7296	18.4983	3.896	0	0	21	16	0	15	0	0
ENST00000429967.3	chrX	574	-1	3179	201	320	2658	APLN	TGA	TGAA	1.02854	0.771408	0.257136	0	4	3	1	0	0.323543	3.83785	0.80355	0	0	57	30	0	51	0	0
ENST00000357460.6	chr14	80	-1	4926	1620	159	3147	HOMEZ	TGA	TGAG	22.8851	21.5994	1.02854	0.257136	89	84	4	1	4.64578	13.333	6.46883	0.0817083	0.00612829	51	69	0	45	0	0
ENST00000376300.7	chr2	582	-1	6788	1863	69	4856	CCDC93	TGA	TGAA	21.8566	21.3423	0.514272	0	85	83	2	0	3.21988	11.4559	7.45322	0	0	30	89	0	24	0	0
ENST00000309733.6	chr4	460	1	8799	366	121	8312	FAM241A	TAA	TAAA	6.68554	6.17127	0.257136	0.257136	26	24	1	1	0.759806	16.8614	2.12509	0.0309355	0.0018347	51	162	0	45	0	0
ENST00000251810.7	chr8	430	-1	4886	1023	238	3625	RRM2B	TAA	TAAA	30.5992	30.5992	0	0	119	119	0	0	6.26263	29.9112	0	0	0	27	67	0	21	0	0
ENST00000396813.5	chr14	114	-1	1425	909	263	253	DHRS1	TAA	TAAC	7.71408	7.19981	0.514272	0	30	28	2	0	5.41339	7.92058	1.95541	0	0	105	5	0	99	0	0
ENST00000243189.12	chr1	304	-1	1380	840	206	334	RSRP1	TAA	TAAA	8.99976	6.4284	2.05709	0.514272	35	25	8	2	6.52157	7.65286	9.98587	1.53974	0.201198	21	4	0	15	0	0
ENST00000298282.14	chr11	1083	1	3597	1386	220	1991	PKNOX2	TAG	TAGT	10.2854	6.68554	3.5999	0	40	26	14	0	2.85945	4.82362	16.3632	0	0	30	24	0	24	0	0
ENST00000243644.9	chr19	1090	-1	2310	1566	236	508	ZNF350	TAG	TAGG	3.08563	2.57136	0.514272	0	12	10	2	0	1.33577	1.64199	2.17912	0	0	48	11	0	42	0	0
ENST00000272418.7	chr2	444	-1	3253	1260	11	1982	MRPS5	TAA	TAAC	67.8839	67.8839	0	0	264	264	0	0	20.8681	53.8761	0	0	0	138	47	0	132	0	0
ENST00000298355.7	chr14	206	-1	5239	2100	1116	2023	TRIM9	TAA	TAAG	19.2852	17.9995	1.02854	0.257136	75	70	4	1	3.68108	8.5712	0.921635	0.127106	0.0148295	240	42	0	234	0	0
ENST00000408912.7	chr16	416	1	3581	3060	311	210	ARMC5	TAG	TAGA	19.7995	19.7995	0	0	77	77	0	0	5.52904	6.47042	0	0	0	48	4	0	42	0	0
ENST00000372466.8	chrX	479	-1	1710	522	246	942	NUP62CL	TGA	TGAA	20.0566	15.6853	3.5999	0.771408	78	61	14	3	11.729	30.0485	14.6338	0.818905	0.0272528	63	24	0.257136	57	4.51116	0.150129
ENST00000239144.4	chr17	697	-1	1778	699	229	850	HOXB8	TAG	TAGG	9.2569	8.48549	0.771408	0	36	33	3	0	5.20635	12.1395	3.36859	0	0	102	10	0	96	0	0
ENST00000262093.10	chr18	176	-1	7632	1239	76	6317	FECH	TGA	TGAC	30.5992	29.3135	1.28568	0	119	114	5	0	4.00933	23.659	16.9168	0	0	78	116	0	72	0	0
ENST00000345317.7	chr7	130	-1	3794	1047	155	2592	SKAP2	TGA	TGAG	60.6841	58.8842	1.79995	0	236	229	7	0	15.9948	56.2408	11.6126	0	0	105	53	0	99	0	0
ENST00000229758.8	chr6	852	-1	2009	1311	76	622	FBXO5	TGA	TGAT	78.9408	77.398	1.02854	0.514272	307	301	4	2	39.2936	59.0373	13.5335	0.826804	0.0140048	39	15	0	33	0	0
ENST00000355765.10	chr14	180	1	2823	1977	164	682	PRPF39	TGA	TGAT	22.8851	21.8566	1.02854	0	89	85	4	0	8.10666	11.0554	6.27161	0	0	129	14	0	123	0	0
ENST00000618550.5	chr19	218	-1	4422	4008	106	308	PRR36	TGA	TGAG	5.14272	5.14272	0	0	20	20	0	0	1.16299	1.28311	0	0	0	117	3	0	111	0	0
ENST00000318596.7	chr19	505	1	3075	924	145	2006	SLC25A42	TAG	TAGG	2.57136	2.31422	0.257136	0	10	9	1	0	0.836215	2.50457	1.77335	0	0	345	22	0	339	0	0
ENST00000369983.3	chr10	510	1	6358	5547	254	557	GBF1	TAA	TAAG	117.511	111.597	5.91413	0	457	434	23	0	18.4824	20.1185	23.284	0	0	51	7	0	45	0	0
ENST00000568956.1	chr19	1199	1	3960	3147	348	465	ZNF865	TGA	TGAC	8.99976	8.74263	0.257136	0	35	34	1	0	2.27267	2.77808	0.738897	0	0	243	3	0	237	0	0
ENST00000372153.5	chr9	586	-1	3240	2523	146	571	DDX31	TAA	TAAA	32.9134	32.9134	0	0	128	128	0	0	10.1585	13.0453	0	0	0	54	10	0	48	0	0
ENST00000391860.7	chr1	1760	-1	10869	1542	398	8929	PGBD5	TGA	TGAT	8.74263	7.97122	0.771408	0	34	31	3	0	0.804363	5.1694	1.93821	0	0	231	98	0	225	0	0
ENST00000280571.9	chr12	892	-1	6096	603	291	5202	RILPL2	TAG	TAGA	5.91413	4.11418	1.79995	0	23	16	7	0	0.970166	6.82285	6.1854	0	0	18	72	0	12	0	0
ENST00000338891.11	chr6	716	-1	4096	3390	438	268	FAM184A	TGA	TGAA	9.77117	7.71408	2.05709	0	38	30	8	0	2.38554	2.27554	4.69655	0	0	48	3	0	42	0	0
ENST00000265316.9	chr2	995	-1	2935	2496	279	160	ABCB6	TGA	TGAC	11.5711	10.5426	1.02854	0	45	41	4	0	3.94246	4.22379	3.68654	0	0	33	4	0	27	0	0
ENST00000550804.6	chr12	424	-1	5531	2043	67	3421	CALCOCO1	TGA	TGAT	19.5423	19.2852	0.257136	0	76	75	1	0	3.53324	9.43965	3.83785	0	0	228	43	0	222	0	0
ENST00000406855.7	chr22	88	-1	1018	687	13	318	DERL3	TGA	TGAG	11.314	11.314	0	0	44	44	0	0	11.1139	16.4687	0	0	0	123	6	0	117	0	0
ENST00000393240.7	chr12	614	1	3050	1236	665	1149	SYT1	TAA	TAAA	5.91413	5.91413	0	0	23	23	0	0	1.93906	4.78489	0	0	0	36	23	0	30	0	0
ENST00000472174.7	chr1	555	1	942	585	75	282	ATP6V0B	TAG	TAGA	127.539	123.682	2.05709	1.79995	496	481	8	7	135.392	211.423	27.4278	6.38281	0.0301898	267	1	1.79995	261	6.89637	0.0326188
ENST00000393437.7	chr2	497	-1	13867	2232	634	11001	LONRF2	TGA	TGAT	12.5997	12.5997	0	0	49	49	0	0	0.908608	5.64501	0	0	0	45	194	0	39	0	0
ENST00000397203.6	chr12	9	1	9073	3234	151	5688	ERC1	TGA	TGAC	37.5419	35.7419	1.28568	0.514272	146	139	5	2	4.13776	11.0519	8.51444	0.0904135	0.0081808	126	76	0.514272	120	4.2856	0.38777
ENST00000361175.8	chr10	371	1	3904	1812	363	1729	PAPSS2	TAA	TAAG	24.1708	24.1708	0	0	94	94	0	0	6.19129	13.3393	0	0	0	27	31	0	21	0	0
ENST00000372458.8	chr1	545	-1	1421	807	105	509	ELOVL1	TGA	TGAG	51.1701	44.7417	5.39986	1.02854	199	174	21	4	36.0099	55.442	51.4272	2.02072	0.0364474	18	2	0	12	0	0
ENST00000371224.7	chr10	427	-1	3307	2355	137	815	ALDH18A1	TGA	TGAA	226.794	222.166	4.62845	0	882	864	18	0	68.58	94.3378	33.7843	0	0	165	10	0	159	0	0
ENST00000645955.1	chr13	161	1	1784	837	153	794	RNASEH2B	TGA	TGAG	21.8566	16.1996	5.65699	0	85	63	22	0	12.2514	19.3543	36.9738	0	0	48	9	0	42	0	0
ENST00000360000.8	chrX	446	-1	1086	321	140	625	TCEAL8	TGA	TGAA	110.054	89.9976	19.5423	0.514272	428	350	76	2	101.339	280.366	139.588	0.822835	0.00293486	60	9	0.257136	54	4.76178	0.0169841
ENST00000374403.4	chrX	328	1	4343	3666	62	615	KIF4A	TGA	TGAA	78.9408	78.6836	0.257136	0	307	306	1	0	18.1766	21.4631	4.14736	0	0	75	10	0	69	0	0
ENST00000280871.9	chr12	264	-1	7176	1914	267	4995	SLC2A13	TAA	TAAT	8.48549	8.22835	0.257136	0	33	32	1	0	1.18248	4.29904	0.963056	0	0	84	98	0	78	0	0
ENST00000377727.1	chr6	125	-1	352	279	4	69	HIST1H4H	TAA	TAAG	713.038	707.896	3.08563	2.05709	2773	2753	11	8	2025.68	2537.26	771.408	29.8129	0.01175	69	0	2.05709	63	32.6522	0.0128691
ENST00000534313.6	chr11	621	1	3454	3096	167	191	SIPA1	TGA	TGAG	14.6568	14.1425	0.514272	0	57	55	2	0	4.24341	4.56799	3.07947	0	0	27	2	0	21	0	0
ENST00000354284.8	chr11	995	1	1411	1023	57	331	TMEM25	TAA	TAAC	2.8285	2.57136	0.257136	0	11	10	1	0	2.0046	2.51355	4.51116	0	0	96	5	0	90	0	0
ENST00000590194.5	chr17	632	-1	1497	1023	121	353	SLC25A39	TGA	TGAA	36.7705	32.3991	4.37131	0	143	126	17	0	24.5628	31.6707	36.1266	0	0	282	2	0	276	0	0
ENST00000335183.11	chr14	223	1	796	606	56	134	CDKN3	TAA	TAAA	34.7134	34.1991	0.514272	0	135	133	2	0	43.6098	56.4341	9.18343	0	0	51	3	0	45	0	0
ENST00000338791.11	chr7	620	-1	2566	1767	75	724	IMPDH1	TGA	TGAG	32.142	31.8849	0	0.257136	125	124	0	1	12.5261	18.0446	0	0.35516	0.0196823	75	4	0	69	0	0
ENST00000645929.1	chr14	48	-1	7377	6876	95	406	CHD8	TGA	TGAA	132.425	128.054	4.11418	0.257136	515	498	15	1	17.9511	18.6233	43.3071	0.63334	0.034008	201	4	0.257136	195	1.31865	0.0708063
ENST00000359238.6	chr17	690	1	2270	780	261	1229	SNX11	TGA	TGAG	6.4284	5.14272	1.28568	0	25	20	5	0	2.83189	6.59323	4.92598	0	0	132	8	0	126	0	0
ENST00000611250.4	chrX	170	1	4668	2439	70	2159	JADE3	TGA	TGAT	24.9422	24.6851	0	0.257136	97	96	0	1	5.34323	10.121	0	0.1191	0.0117676	126	38	0	120	0	0
ENST00000510878.1	chr1	139	1	804	435	28	341	AGTRAP	TAA	TAAG	26.2279	25.7136	0	0.514272	102	100	0	2	32.6217	59.1117	0	1.50813	0.0255132	234	3	0.257136	228	1.12779	0.0190789
ENST00000573759.1	chr17	104	1	2159	585	323	1251	MIS12	TAA	TAAT	12.3425	7.97122	3.85704	0.514272	48	31	15	2	5.71678	13.626	11.9413	0.411089	0.0301694	39	18	0.514272	33	15.584	1.1437
ENST00000248104.11	chr16	53	-1	4275	657	589	3029	UNKL	TGA	TGAC	6.17127	2.31422	3.5999	0.257136	24	9	14	1	1.44357	3.52241	6.11189	0.0848914	0.0241004	279	37	0	273	0	0
ENST00000255882.10	chr22	46	-1	6707	6276	81	350	PI4KA	TGA	TGAG	106.197	105.426	0.514272	0.257136	413	410	2	1	15.8338	16.7982	6.34904	0.734674	0.0437352	279	3	0.257136	273	0.94189	0.0560708
ENST00000613397.4	chr11	882	1	4021	1824	1723	474	BIRC2	TAA	TAAA	25.9707	17.4853	8.48549	0	101	68	33	0	6.45878	9.58621	4.92483	0	0	54	9	0	48	0	0
ENST00000274140.10	chr5	41	1	9596	2700	198	6698	2020-03-06	TAA	TAAA	164.824	161.224	2.8285	0.771408	641	627	11	3	17.1763	59.7127	14.2853	0.11517	0.00192873	81	141	0.257136	75	3.42848	0.0574163
ENST00000573584.6	chr17	99	-1	3566	2193	6	1367	NUP88	TGA	TGAC	132.939	132.939	0	0	517	517	0	0	37.2797	60.6199	0	0	0	27	34	0	21	0	0
ENST00000271526.9	chr1	1249	1	2023	1443	231	349	PRCC	TAG	TAGG	148.882	104.912	43.7131	0.257136	579	408	170	1	73.5945	72.7037	189.234	0.73678	0.010134	87	4	0.257136	81	3.17452	0.0436638
ENST00000328194.8	chr11	180	-1	4946	3831	275	840	DENND5A	TGA	TGAC	20.5709	17.9995	2.57136	0	80	70	10	0	4.15909	4.69839	9.3504	0	0	30	14	0	24	0	0
ENST00000309558.8	chr3	133	-1	4557	1857	7	2693	SUSD5	TAG	TAGG	47.313	47.313	0	0	184	184	0	0	10.3825	25.4782	0	0	0	75	54	0	69	0	0
ENST00000332624.8	chr2	886	-1	6344	2712	302	3330	TRAK2	TGA	TGAG	6.4284	4.62845	1.54282	0.257136	25	18	6	1	1.0133	1.70666	5.10866	0.077218	0.0452452	18	63	0	12	0	0
ENST00000584773.5	chr17	773	-1	1272	729	118	425	SRSF1	TAA	TAAG	446.645	426.332	19.7995	0.514272	1737	1658	77	2	351.136	584.817	167.792	1.21005	0.00206911	102	6	0.514272	96	5.357	0.00916013
ENST00000344517.5	chr1	1756	-1	3824	2184	49	1591	ABCB10	TAA	TAAG	44.2274	43.7131	0.257136	0.257136	172	170	1	1	11.5657	20.0152	5.24767	0.161619	0.00807483	18	35	0	12	0	0
ENST00000301919.9	chr11	903	-1	4058	1005	1423	1630	MSANTD4	TGA	TGAT	22.628	16.7138	5.65699	0.257136	88	65	22	1	5.57614	16.6307	3.9754	0.157752	0.00948561	21	41	0	15	0	0
ENST00000431561.7	chr16	131	-1	3303	1155	607	1541	ZNF200	TAA	TAAT	17.7424	14.1425	3.5999	0	69	55	14	0	5.3716	12.2446	5.93065	0	0	60	27	0	54	0	0
ENST00000434041.6	chr17	661	-1	753	345	81	327	ARL17B	TGA	TGAT	16.7138	14.6568	2.05709	0	65	57	8	0	22.1963	42.4833	25.3962	0	0	57	5	0	51	0	0
ENST00000263805.8	chr15	117	-1	10415	5619	321	4475	ZNF106	TGA	TGAA	59.1413	59.1413	0	0	230	230	0	0	5.67847	10.5252	0	0	0	33	64	0	27	0	0
ENST00000268638.10	chr16	712	1	2623	1248	57	1318	IRF8	TAA	TAAG	3.08563	3.08563	0	0	12	12	0	0	1.17638	2.47246	0	0	0	72	18	0	66	0	0
ENST00000373116.6	chr1	467	-1	908	741	103	64	MRPS15	TAA	TAAA	88.4548	75.0837	13.3711	0	344	292	52	0	97.4172	101.328	129.816	0	0	30	2	0	24	0	0
ENST00000373218.5	chr10	273	1	7446	330	251	6865	EIF4EBP2	TGA	TGAC	17.9995	14.1425	3.08563	0.771408	70	55	12	3	2.41734	42.856	12.2934	0.112368	0.002622	18	123	0	12	0	0
ENST00000643188.1	chr20	208	-1	1895	1392	160	343	GSS	TGA	TGAG	60.427	60.427	0	0	235	235	0	0	31.8876	43.4102	0	0	0	141	4	0	135	0	0
ENST00000372745.1	chr10	318	-1	2275	1224	211	840	AP3M1	TGA	TGAG	99.2545	95.6546	3.5999	0	386	372	14	0	43.6284	78.1492	17.0612	0	0	99	16	0	93	0	0
ENST00000370693.5	chr6	523	1	6606	603	366	5637	BAG2	TAG	TAGT	39.0847	26.485	12.3425	0.257136	152	103	48	1	5.91654	43.9221	33.7228	0.0456158	0.00103856	63	124	0	57	0	0
ENST00000378076.4	chr10	69	-1	6502	3159	145	3198	ITGA8	TGA	TGAC	3.5999	3.5999	0	0	14	14	0	0	0.553661	1.13957	0	0	0	183	55	0	177	0	0
ENST00000322213.8	chrX	264	-1	9739	3669	122	5948	SMC1A	TAG	TAGC	340.191	338.648	0.257136	1.28568	1323	1317	1	5	34.9308	92.2999	2.10767	0.216153	0.00234186	132	92	0.257136	126	2.04076	0.0221101
ENST00000414097.6	chr8	519	-1	3710	1152	862	1696	NDRG1	TAG	TAGG	93.5975	88.4548	4.88558	0.257136	364	344	19	1	25.2284	76.7837	5.66773	0.151613	0.00197455	33	23	0	27	0	0
ENST00000593916.5	chr19	1238	1	503	273	160	70	ZNF773	TGA	TGAA	0.771408	0.514272	0.257136	0	3	2	1	0	1.53361	1.88378	1.6071	0	0	70	0	0	64	0	0
ENST00000396556.6	chr3	122	-1	6555	2262	117	4176	OSBPL10	TGA	TGAT	3.34277	3.34277	0	0	13	13	0	0	0.509957	1.47779	0	0	0	45	69	0	39	0	0
ENST00000484866.5	chr3	842	1	1685	1425	76	184	ZNF639	TGA	TGAT	21.8566	20.828	0.771408	0.257136	85	81	3	1	12.9713	14.6162	10.1501	1.39748	0.0956119	33	2	0.257136	27	9.52356	0.651578
ENST00000295777.9	chr3	810	1	1862	1200	425	237	SERPINI1	TAA	TAAG	8.74263	8.74263	0	0	34	34	0	0	4.69529	7.28552	0	0	0	18	6	0	12	0	0
ENST00000483273.2	chr1	194	-1	2135	243	1693	199	UQCRHL	TAA	TAAA	83.0549	82.5407	0.257136	0.257136	323	321	1	1	38.9016	339.674	0.151882	1.29214	0.00380407	150	2	0.257136	144	1.78567	0.00525701
ENST00000379719.8	chr11	182	1	6117	3084	106	2927	IPO7	TGA	TGAG	329.648	320.906	8.22835	0.514272	1282	1248	32	2	53.8905	104.055	77.626	0.175699	0.00168852	33	75	0	27	0	0
ENST00000394249.8	chr15	489	-1	3027	1830	112	1085	PRC1	TGA	TGAG	227.051	218.823	6.4284	1.79995	883	851	25	7	75.0086	119.575	57.3964	1.65894	0.0138736	42	17	0	36	0	0
ENST00000256442.10	chr5	193	1	1984	1269	107	608	CCNB1	TAA	TAAC	493.701	476.73	16.971	0	1920	1854	66	0	248.841	375.674	158.607	0	0	120	11	0	114	0	0
ENST00000586682.1	chr19	425	1	1270	591	-1	680	RAB8A	TGA	TGAG	138.339	66.084	72.2552	0	538	257	281	0	108.928	111.817	-72255.2	0	0	39	7	0	33	0	0
ENST00000423759.5	chrX	342	1	7677	5655	70	1952	TAF1	TGA	TGAG	30.8563	30.3421	0.257136	0.257136	120	118	1	1	4.01932	5.36553	3.67337	0.13173	0.0245511	48	41	0	42	0	0
ENST00000419938.5	chr2	668	-1	1710	630	227	853	ZEB2	TGA	TGAA	4.11418	1.28568	2.57136	0.257136	16	5	10	1	2.40595	2.04076	11.3276	0.301449	0.147714	54	17	0	48	0	0
ENST00000406197.5	chr7	811	-1	515	246	133	136	CNPY1	TAG	TAGG	3.5999	3.34277	0	0.257136	14	13	0	1	6.99011	13.5885	0	1.89071	0.13914	33	2	0.257136	27	9.52356	0.700855
ENST00000375071.4	chr1	248	1	764	408	27	329	CDA	TGA	TGAC	1.02854	1.02854	0	0	4	4	0	0	1.34626	2.52094	0	0	0	27	4	0	21	0	0
ENST00000617178.4	chr22	312	-1	1961	657	48	1256	POLDIP3	TAA	TAAC	62.2269	61.4555	0.771408	0	242	239	3	0	31.7322	93.5396	16.071	0	0	21	12	0	15	0	0
ENST00000369878.9	chr10	526	1	15812	2595	181	13036	CNNM2	TAG	TAGG	21.5994	20.3137	1.02854	0.257136	84	79	4	1	1.36601	7.82803	5.68256	0.0197251	0.0025198	84	212	0	78	0	0
ENST00000356511.6	chr1	497	1	1034	858	10	166	PPIE	TAG	TAGA	57.0842	57.0842	0	0	222	222	0	0	55.2072	66.5317	0	0	0	162	1	0	156	0	0
ENST00000400198.8	chr13	257	-1	3318	789	212	2317	ARGLU1	TAA	TAAA	33.1706	29.0564	4.11418	0	129	113	16	0	9.99715	36.8268	19.4065	0	0	129	46	0	123	0	0
ENST00000262370.12	chr16	160	1	3885	1698	129	2058	MGRN1	TGA	TGAG	42.4274	40.6275	1.54282	0.257136	165	158	6	1	10.9208	23.9267	11.9598	0.124945	0.00522198	141	8	0.257136	135	1.90471	0.0796062
ENST00000380050.8	chr7	376	1	5126	1377	301	3448	CDK14	TGA	TGAC	4.88558	4.88558	0	0	19	19	0	0	0.953099	3.54799	0	0	0	90	62	0	84	0	0
ENST00000366933.5	chr1	1681	1	5753	1053	29	4671	SPATA17	TAA	TAAA	4.37131	4.37131	0	0	17	17	0	0	0.759832	4.15129	0	0	0	39	119	0	33	0	0
ENST00000368599.4	chr6	697	1	9742	897	52	8793	CALHM5	TAG	TAGC	2.31422	2.31422	0	0	9	9	0	0	0.237551	2.57996	0	0	0	18	170	0	12	0	0
ENST00000381844.8	chr2	29	-1	2171	705	158	1308	YWHAQ	TAA	TAAA	405.504	399.332	5.65699	0.514272	1577	1553	22	2	186.782	566.429	35.8038	0.393174	0.000694129	207	18	0	201	0	0
ENST00000301717.8	chr16	67	-1	1404	1035	27	342	SPSB3	TGA	TGAC	9.77117	9.51403	0	0.257136	38	37	0	1	6.95952	9.1923	0	0.75186	0.0817923	216	1	0.257136	210	1.22446	0.133205
ENST00000601005.2	chr19	414	1	2400	1563	-2	839	CYP4F22	TGA	TGAG	3.5999	1.79995	1.79995	0	14	7	7	0	1.49996	1.1516	-899.976	0	0	123	9	0	117	0	0
ENST00000377113.6	chr10	88	-1	3754	378	440	2936	CASC10	TGA	TGAA	2.57136	0.514272	1.28568	0.771408	10	2	5	3	0.684965	1.36051	2.922	0.262741	0.19312	21	35	0	15	0	0
ENST00000596536.5	chr19	466	1	3159	2637	277	245	FCHO1	TGA	TGAA	5.39986	5.39986	0	0	21	21	0	0	1.70936	2.04773	0	0	0	51	4	0	45	0	0
ENST00000219204.8	chr16	495	1	1924	459	103	1362	ARL2BP	TAG	TAGG	19.0281	14.9139	4.11418	0	74	58	16	0	9.88985	32.4921	39.9435	0	0	66	22	0	60	0	0
ENST00000404914.8	chr2	1144	1	2752	1149	16	1587	ATG4B	TGA	TGAA	62.7412	62.4841	0	0.257136	244	243	0	1	22.7984	54.3813	0	0.162026	0.00297945	30	19	0	24	0	0
ENST00000234392.3	chr2	332	1	1116	840	40	236	VAX2	TAA	TAAG	3.08563	3.08563	0	0	12	12	0	0	2.7649	3.67337	0	0	0	180	2	0	174	0	0
ENST00000332496.10	chr15	475	1	3736	2481	234	1021	SEMA4B	TGA	TGAG	7.71408	7.45695	0.257136	0	30	29	1	0	2.0648	3.00562	1.09887	0	0	162	9	0	156	0	0
ENST00000314425.9	chrX	339	-1	5491	4080	125	1286	ZMYM3	TGA	TGAG	96.426	95.3975	1.02854	0	375	371	4	0	17.5607	23.3817	8.22835	0	0	108	17	0	102	0	0
ENST00000418331.7	chr11	368	1	7800	3981	348	3471	PTPRJ	TAA	TAAT	12.0854	11.5711	0.514272	0	47	45	2	0	1.54941	2.90659	1.47779	0	0	120	46	0	114	0	0
ENST00000244050.3	chr20	359	1	1660	762	74	824	SNAI1	TGA	TGAC	1.54282	1.02854	0.514272	0	6	4	2	0	0.929407	1.3498	6.94962	0	0	336	5	0	330	0	0
ENST00000614691.1	chr12	458	1	1323	798	71	454	METTL7B	TAG	TAGC	20.828	20.5709	0.257136	0	81	80	1	0	15.743	25.778	3.62163	0	0	36	5	0	30	0	0
ENST00000506784.5	chr1	1601	1	2098	1482	214	402	CDK18	TGA	TGAG	8.99976	8.22835	0	0.771408	35	32	0	3	4.28969	5.5522	0	1.91893	0.345616	237	2	0.514272	231	2.22629	0.400974
ENST00000355673.8	chr12	522	1	4157	2979	270	908	MBD6	TAG	TAGC	12.0854	9.77117	2.31422	0	47	38	9	0	2.90724	3.28002	8.5712	0	0	45	7	0	39	0	0
ENST00000358365.7	chr17	366	1	3252	2043	221	988	RHOT1	TGA	TGAT	21.0852	20.828	0.257136	0	82	81	1	0	6.48375	10.1948	1.16351	0	0	54	21	0	48	0	0
ENST00000313375.8	chr7	296	-1	3207	2526	24	657	MLXIPL	TAG	TAGT	2.57136	2.57136	0	0	10	10	0	0	0.801796	1.01796	0	0	0	231	3	0	225	0	0
ENST00000309083.7	chr12	63	1	1136	276	365	495	PTMS	TGA	TGAG	50.3987	20.5709	29.3135	0.514272	196	80	114	2	44.365	74.5322	80.311	1.03893	0.0139394	207	2	0.514272	201	2.55857	0.0343284
ENST00000332853.9	chr10	195	-1	6369	930	31	5408	VSTM4	TAG	TAGT	2.05709	2.05709	0	0	8	8	0	0	0.322985	2.21192	0	0	0	30	89	0	24	0	0
ENST00000055077.8	chr7	310	-1	1640	1032	10	598	RFC2	TAG	TAGA	123.94	123.682	0	0.257136	482	481	0	1	75.5729	119.847	0	0.429993	0.00358784	21	10	0.257136	15	17.1424	0.143035
ENST00000370784.8	chrX	605	1	1323	555	400	368	FAM122C	TAA	TAAA	1.28568	1.02854	0.257136	0	5	4	1	0	0.971792	1.85323	0.64284	0	0	90	9	0	84	0	0
ENST00000373001.4	chr1	488	-1	2636	1167	120	1349	RRAGC	TAG	TAGT	14.6568	13.6282	0.514272	0.514272	57	53	2	2	5.56023	11.678	4.2856	0.381225	0.0326447	129	25	0	123	0	0
ENST00000369489.10	chr1	962	-1	1041	720	48	273	CD58	TGA	TGAT	15.6853	15.6853	0	0	61	61	0	0	15.0675	21.7851	0	0	0	45	6	0	39	0	0
ENST00000354725.8	chr7	615	1	3403	2700	174	529	SND1	TAA	TAAG	370.276	356.133	14.1425	0	1440	1385	55	0	108.809	131.901	81.2786	0	0	321	5	0	315	0	0
ENST00000508192.5	chr11	559	1	2879	2142	496	241	MARK2	TAA	TAAC	39.599	34.4562	5.14272	0	154	134	20	0	13.7544	16.086	10.3684	0	0	241	0	0	235	0	0
ENST00000260118.7	chr8	282	-1	1203	924	32	247	GGH	TGA	TGAA	119.568	117.254	0	2.31422	465	456	0	9	99.3917	126.898	0	9.36933	0.0738334	18	8	0	12	0	0
ENST00000651870.1	chr18	20	-1	3327	1317	180	1830	ZBTB14	TAG	TAGA	11.5711	11.0569	0.514272	0	45	43	2	0	3.47794	8.39548	2.85707	0	0	48	41	0	42	0	0
ENST00000265433.7	chr8	373	-1	4621	2232	149	2240	NBN	TAA	TAAC	71.2267	68.1411	3.08563	0	277	265	12	0	15.4137	30.5291	20.7089	0	0	39	42	0	33	0	0
ENST00000397117.5	chr3	44	-1	1558	822	586	150	SEC13	TAA	TAAC	207.252	191.052	15.9424	0.257136	806	743	62	1	133.024	232.423	27.2055	1.71424	0.0073755	150	0	0.257136	144	1.78567	0.00768282
ENST00000561421.5	chr15	413	1	1504	1227	152	125	FAH	TGA	TGAG	32.9134	32.142	0.771408	0	128	125	3	0	21.8839	26.1956	5.07505	0	0	108	1	0	102	0	0
ENST00000159087.7	chr19	453	-1	4133	3666	179	288	ANO8	TAG	TAGC	5.14272	4.88558	0.257136	0	20	19	1	0	1.24431	1.33267	1.43651	0	0	288	0	0	282	0	0
ENST00000436949.5	chr7	354	-1	2505	2283	158	64	SEMA3A	TGA	TGAG	10.0283	9.77117	0.257136	0	39	38	1	0	4.00332	4.27997	1.62744	0	0	33	2	0	27	0	0
ENST00000380752.10	chr13	59	-1	7298	1857	381	5060	SLC7A1	TGA	TGAC	121.882	111.083	7.97122	2.8285	474	432	31	11	16.7008	59.8184	20.9218	0.558991	0.00934481	141	67	1.54282	135	11.4283	0.191049
ENST00000267202.7	chr12	882	-1	2661	825	56	1780	VPS37B	TGA	TGAG	15.6853	15.171	0.514272	0	61	59	2	0	5.89451	18.3891	9.18343	0	0	126	19	0	120	0	0
ENST00000341142.7	chr2	1009	1	1479	1230	66	183	GMPPA	TGA	TGAG	44.9988	44.2274	0.771408	0	175	172	3	0	30.4252	35.9572	11.688	0	0	171	3	0	165	0	0
ENST00000262288.7	chr17	766	1	1897	1326	49	522	SCPEP1	TAG	TAGG	65.3126	64.5411	0.771408	0	254	251	3	0	34.4294	48.6736	15.743	0	0	21	9	0	15	0	0
ENST00000369893.10	chr10	521	1	6725	936	65	5724	SFXN2	TAA	TAAA	29.0564	28.285	0.771408	0	113	110	3	0	4.32065	30.219	11.8678	0	0	102	79	0	96	0	0
ENST00000261733.7	chr12	780	1	9516	1521	44	7951	ALDH2	TAA	TAAG	73.2838	72.7695	0.514272	0	285	283	2	0	7.70111	47.8432	11.688	0	0	96	125	0	90	0	0
ENST00000505036.5	chr4	524	-1	764	198	397	169	NDUFC1	TAA	TAAA	102.083	94.8832	6.17127	1.02854	397	369	24	4	133.617	479.208	15.5447	6.08606	0.0127002	21	3	0.257136	15	17.1424	0.0357724
ENST00000569748.5	chr16	633	-1	4509	2436	904	1169	AP1G1	TGA	TGAG	133.454	117.511	15.9424	0	519	457	62	0	29.5972	48.2394	17.6354	0	0	111	24	0	105	0	0
ENST00000305536.11	chrX	586	1	1778	936	40	802	RBMX2	TGA	TGAA	26.7421	25.9707	0.771408	0	104	101	3	0	15.0406	27.7465	19.2852	0	0	45	14	0	39	0	0
ENST00000219299.8	chr16	518	1	5227	1101	73	4053	CCDC113	TAG	TAGC	4.37131	4.11418	0.257136	0	17	16	1	0	0.836295	3.73676	3.52241	0	0	36	51	0	30	0	0
ENST00000280800.5	chr12	800	1	4742	1737	8	2997	PLBD2	TGA	TGAA	44.2274	44.2274	0	0	172	172	0	0	9.32674	25.4619	0	0	0	81	15	0	75	0	0
ENST00000434634.6	chr15	444	-1	5342	1104	55	4183	WDR73	TGA	TGAC	48.5987	48.5987	0	0	189	189	0	0	9.09748	44.0206	0	0	0	21	73	0	15	0	0
ENST00000379079.7	chr11	281	-1	2424	876	271	1277	WT1	TGA	TGAG	3.5999	3.5999	0	0	14	14	0	0	1.48511	4.10948	0	0	0	66	19	0	60	0	0
ENST00000216452.9	chr14	303	-1	1349	534	59	756	PIGH	TGA	TGAG	11.5711	11.0569	0.514272	0	45	43	2	0	8.57756	20.7057	8.71648	0	0	51	13	0	45	0	0
ENST00000374296.3	chr1	314	-1	3252	1008	661	1583	PAQR7	TGA	TGAA	5.14272	5.14272	0	0	20	20	0	0	1.5814	5.10191	0	0	0	111	19	0	105	0	0
ENST00000394767.3	chr4	430	-1	5524	1071	445	4008	CXXC4	TAA	TAAA	4.62845	3.85704	0.771408	0	18	15	3	0	0.83788	3.60135	1.7335	0	0	39	82	0	33	0	0
ENST00000440460.6	chr11	937	1	5852	2019	291	3542	DIXDC1	TAA	TAAT	8.48549	7.19981	1.02854	0.257136	33	28	4	1	1.45002	3.56603	3.53452	0.0725963	0.0203577	18	56	0	12	0	0
ENST00000600449.8	chrX	672	-1	2675	1020	206	1449	TMEM185A	TAG	TAGA	13.3711	10.5426	2.57136	0.257136	52	41	10	1	4.99853	10.3359	12.4823	0.177458	0.0171691	189	13	0	183	0	0
ENST00000409465.5	chr2	844	-1	3052	2220	426	406	STAT1	TAG	TAGA	59.9127	55.0271	4.88558	0	233	214	19	0	19.6306	24.787	11.4685	0	0	102	4	0	96	0	0
ENST00000636934.1	chr8	5	1	1745	618	203	924	CLN8	TAG	TAGG	3.85704	3.08563	0.771408	0	15	12	3	0	2.21034	4.99293	3.80004	0	0	87	18	0	81	0	0
ENST00000374259.7	chrX	334	1	3256	1485	326	1445	FOXO4	TGA	TGAG	7.71408	4.62845	3.08563	0	30	18	12	0	2.36919	3.1168	9.46513	0	0	105	19	0	99	0	0
ENST00000498907.3	chr19	579	-1	2556	1044	114	1398	CEBPA	TGA	TGAG	6.68554	5.65699	1.02854	0	26	22	4	0	2.61562	5.41858	9.02232	0	0	108	14	0	102	0	0
ENST00000581312.6	chr1	1047	-1	8877	2499	339	6039	OTUD7B	TGA	TGAA	20.5709	17.2281	3.34277	0	80	67	13	0	2.31732	6.894	9.86067	0	0	42	94	0	36	0	0
ENST00000376266.9	chr6	215	-1	2580	2316	117	147	CCHCR1	TAA	TAAG	23.6565	22.3708	1.28568	0	92	87	5	0	9.16919	9.65926	10.9887	0	0	114	3	0	108	0	0
ENST00000426621.6	chr22	243	1	2171	462	90	1619	MAFF	TAG	TAGT	0.771408	0.771408	0	0	3	3	0	0	0.355324	1.66971	0	0	0	249	15	0	243	0	0
ENST00000373664.7	chr20	239	-1	5639	3174	61	2404	RBL1	TAA	TAAT	25.7136	25.7136	0	0	100	100	0	0	4.55996	8.10132	0	0	0	87	48	0	81	0	0
ENST00000449193.6	chr10	89	-1	6553	2694	2247	1612	SKIDA1	TAA	TAAA	6.94267	5.91413	1.02854	0	27	23	4	0	1.05946	2.1953	0.457741	0	0	84	29	0	78	0	0
ENST00000308736.7	chr12	908	-1	4514	3441	103	970	DHX37	TGA	TGAC	107.997	106.454	1.54282	0	420	414	6	0	23.9249	30.937	14.9788	0	0	78	4	0	72	0	0
ENST00000442039.3	chr16	54	-1	872	366	18	488	C16orf91	TGA	TGAC	16.7138	16.1996	0	0.514272	65	63	0	2	19.1673	44.2611	0	1.05384	0.0238095	303	3	0.514272	297	1.73156	0.0391214
ENST00000258729.8	chr7	114	-1	4229	1707	375	2147	IGF2BP3	TAA	TAAA	71.9981	66.084	5.91413	0	280	257	23	0	17.0249	38.7135	15.771	0	0	114	55	0	108	0	0
ENST00000299927.4	chr15	447	1	7818	3771	16	4031	ZNF592	TGA	TGAC	20.828	20.828	0	0	81	81	0	0	2.66411	5.52321	0	0	0	462	52	0	456	0	0
ENST00000408995.5	chr2	523	-1	1322	807	99	416	FHL2	TGA	TGAA	16.971	16.7138	0.257136	0	66	65	1	0	12.8374	20.7111	2.59733	0	0	129	12	0	123	0	0
ENST00000310164.3	chrX	523	1	2152	1176	467	509	ZCCHC12	TAA	TAAG	38.3133	32.9134	5.39986	0	149	128	21	0	17.8036	27.9876	11.5629	0	0	24	7	0	18	0	0
ENST00000358438.6	chr7	519	-1	2020	444	22	1554	POLR2J2	TGA	TGAG	15.4282	13.1139	0.514272	1.79995	60	51	2	7	7.6377	29.5359	23.376	1.15827	0.0392157	54	19	0	48	0	0
ENST00000310496.9	chr17	1040	-1	1820	963	39	818	RFNG	TGA	TGAC	10.5426	10.2854	0.257136	0	41	40	1	0	5.79263	10.6806	6.59323	0	0	138	4	0	132	0	0
ENST00000361198.9	chr10	505	-1	2240	1095	618	527	LDB1	TAA	TAAA	35.999	30.3421	5.39986	0.257136	140	118	21	1	16.071	27.7096	8.73763	0.487924	0.0176085	78	7	0	72	0	0
ENST00000339077.10	chr7	110	1	5574	1728	236	3610	KLHL7	TGA	TGAA	36.2562	32.3991	3.85704	0	141	126	15	0	6.50452	18.7495	16.3434	0	0	36	78	0	30	0	0
ENST00000251303.10	chr16	367	1	1046	795	162	89	SLX1A	TGA	TGAT	33.942	26.7421	7.19981	0	132	104	28	0	32.4493	33.6379	44.4433	0	0	72	3	0	66	0	0
ENST00000424469.2	chr15	492	1	2660	2046	47	567	SLCO3A1	TGA	TGAG	2.31422	2.31422	0	0	9	9	0	0	0.870009	1.1311	0	0	0	72	9	0	66	0	0
ENST00000368468.4	chr6	717	-1	4973	1929	436	2608	MAN1A1	TAA	TAAA	80.7407	71.4838	9.2569	0	314	278	36	0	16.2358	37.0574	21.2314	0	0	51	51	0	45	0	0
ENST00000225698.8	chr17	101	-1	1124	816	76	232	C1QBP	TAG	TAGA	1003.86	990.231	12.8568	0.771408	3904	3851	50	3	893.113	1213.52	169.168	3.32504	0.00274	66	6	0.257136	60	4.2856	0.00353155
ENST00000210060.12	chr19	338	-1	1300	1077	108	115	DHPS	TGA	TGAG	50.6558	49.3701	1.28568	0	197	192	5	0	38.966	45.8404	11.9044	0	0	99	2	0	93	0	0
ENST00000290649.10	chr16	472	-1	3562	1899	212	1451	AMFR	TAG	TAGC	41.1418	40.8846	0	0.257136	160	159	0	1	11.5502	21.5296	0	0.177213	0.00823115	48	24	0	42	0	0
ENST00000376087.4	chr10	112	-1	6546	5100	160	1286	ANKRD26	TGA	TGAA	26.2279	24.9422	1.28568	0	102	97	5	0	4.0067	4.89063	8.0355	0	0	66	23	0	60	0	0
ENST00000310571.7	chr11	758	1	4949	1146	47	3756	PAAF1	TGA	TGAC	26.9993	26.2279	0	0.771408	105	102	0	3	5.4555	22.8865	0	0.20538	0.00897388	27	69	0.771408	21	36.7337	1.60504
ENST00000361684.8	chr22	244	-1	3548	1191	218	2139	TMEM184B	TAG	TAGG	17.7424	16.1996	0.257136	1.28568	69	63	1	5	5.00067	13.6017	1.17952	0.601066	0.0441907	36	18	0	30	0	0
ENST00000618612.4	chr20	22	-1	1473	261	168	1044	FKBP1A	TGA	TGAA	87.9405	80.9979	6.94267	0	342	315	27	0	59.7016	310.337	41.3254	0	0	57	14	0	51	0	0
ENST00000383794.7	chr3	73	1	2895	1371	69	1455	CCDC174	TGA	TGAT	15.171	15.171	0	0	59	59	0	0	5.24042	11.0657	0	0	0	18	20	0	12	0	0
ENST00000215659.13	chr22	364	-1	1733	1071	168	494	MAPK12	TGA	TGAA	10.0283	8.99976	1.02854	0	39	35	4	0	5.78667	8.40314	6.12229	0	0	494	0	0	488	0	0
ENST00000559107.5	chr15	518	-1	1308	597	17	694	TM2D3	TGA	TGAC	45.7702	45.7702	0	0	178	178	0	0	34.9925	76.667	0	0	0	51	9	0	45	0	0
ENST00000436587.6	chr7	62	1	6190	1059	217	4914	C1GALT1	TGA	TGAA	13.1139	11.5711	1.54282	0	51	45	6	0	2.11857	10.9265	7.10975	0	0	27	110	0	21	0	0
ENST00000602748.5	chr7	754	1	3009	2298	274	437	CUL1	TAA	TAAC	170.995	162.253	8.48549	0.257136	665	631	33	1	56.828	70.6061	30.9689	0.588412	0.00833373	27	7	0.257136	21	12.2446	0.173421
ENST00000349830.8	chr8	6	1	5603	4002	229	1372	ARHGEF10	TAA	TAAG	19.2852	19.2852	0	0	75	75	0	0	3.44194	4.81889	0	0	0	45	29	0	39	0	0
ENST00000262803.9	chr19	499	1	5303	3324	266	1713	UPF1	TAA	TAAA	185.909	176.652	8.99976	0.257136	723	687	35	1	35.0574	53.1445	33.8337	0.150109	0.00282453	36	17	0	30	0	0
ENST00000354190.10	chr11	754	1	1932	699	22	1211	PLEKHB1	TGA	TGAG	5.14272	5.14272	0	0	20	20	0	0	2.66186	7.35725	0	0	0	159	14	0	153	0	0
ENST00000441493.7	chr22	12	-1	9402	5976	349	3077	MICAL3	TGA	TGAG	25.7136	25.4565	0	0.257136	100	99	0	1	2.73491	4.25978	0	0.0835671	0.0196177	81	28	0	75	0	0
ENST00000263346.13	chr16	758	1	2203	1998	70	135	TCF25	TGA	TGAG	75.0837	73.5409	1.54282	0	292	286	6	0	34.0825	36.8073	22.0402	0	0	78	1	0	72	0	0
ENST00000649800.1	chr1	600	-1	2764	1365	238	1161	MKNK1	TGA	TGAA	20.828	15.9424	4.88558	0	81	62	19	0	7.53546	11.6794	20.5277	0	0	30	14	0	24	0	0
ENST00000293471.11	chr19	1089	1	3120	1821	421	878	ZNF613	TAA	TAAA	5.14272	4.11418	1.02854	0	20	16	4	0	1.64831	2.2593	2.4431	0	0	114	18	0	108	0	0
ENST00000263681.6	chr11	768	1	3776	1368	123	2285	POLD3	TAA	TAAA	48.5987	47.8273	0.771408	0	189	186	3	0	12.8704	34.9615	6.27161	0	0	159	33	0	153	0	0
ENST00000243082.4	chr12	427	1	1994	1104	108	782	HOXC11	TGA	TGAA	6.17127	6.17127	0	0	24	24	0	0	3.09492	5.58991	0	0	0	63	10	0	57	0	0
ENST00000369592.1	chr10	553	-1	1065	684	299	82	SMNDC1	TAA	TAAT	65.8268	65.3126	0	0.514272	256	254	0	2	61.8092	95.4862	0	6.27161	0.0656808	69	3	0.514272	63	8.16305	0.0854893
ENST00000613478.1	chr17	447	1	2029	351	118	1560	CISD3	TGA	TGAG	15.9424	15.4282	0	0.514272	62	60	0	2	7.85729	43.9549	0	0.329662	0.0075	87	15	0.514272	81	6.34904	0.144444
ENST00000424789.6	chr17	820	1	11676	5940	-2	5738	TANC2	TAA	TAAA	41.1418	20.0566	21.0852	0	160	78	82	0	3.52362	3.37653	-10542.6	0	0	87	84	0	81	0	0
ENST00000225430.9	chr17	459	1	692	558	56	78	RPL19	TAA	TAAA	1044.23	1037.29	6.17127	0.771408	4061	4034	24	3	1509	1858.94	110.201	9.88985	0.00532016	45	2	0.771408	39	19.7797	0.0106403
ENST00000257910.8	chr12	532	1	3633	600	110	2923	TSPAN31	TGA	TGAG	16.7138	14.9139	1.79995	0	65	58	7	0	4.60056	24.8565	16.3632	0	0	18	49	0	12	0	0
ENST00000302558.7	chr2	558	-1	5531	5265	186	80	RGPD8	TGA	TGAG	34.4562	33.6848	0.771408	0	134	131	3	0	6.22966	6.39788	4.14736	0	0	36	1	0	30	0	0
ENST00000519948.3	chr12	599	1	7559	261	280	7018	ATXN7L3B	TAG	TAGC	64.7983	41.656	20.0566	3.08563	252	162	78	12	8.57234	159.602	71.6308	0.439674	0.00275482	42	152	0	36	0	0
ENST00000299237.2	chr16	513	-1	4176	1716	617	1843	ZNF319	TGA	TGAC	6.68554	5.65699	0.771408	0.257136	26	22	3	1	1.60094	3.29662	1.25026	0.13952	0.0423223	72	25	0.257136	66	3.896	1.18182
ENST00000449934.7	chr6	220	1	1325	966	32	327	MICA	TAA	TAAG	12.8568	12.5997	0.257136	0	50	49	1	0	9.70325	13.0431	8.0355	0	0	78	3	0	72	0	0
ENST00000328459.11	chr14	426	-1	19426	2499	129	16798	TTC7B	TGA	TGAG	7.19981	7.19981	0	0	28	28	0	0	0.370627	2.88108	0	0	0	261	187	0	255	0	0
ENST00000426216.6	chr18	236	1	4316	3411	11	894	ATP9B	TAA	TAAG	8.99976	8.99976	0	0	35	35	0	0	2.08521	2.63845	0	0	0	285	5	0	279	0	0
ENST00000361432.3	chr10	601	1	2396	1041	24	1331	FAM45A	TGA	TGAC	6.17127	5.91413	0	0.257136	24	23	0	1	2.57565	5.6812	0	0.19319	0.0340052	24	27	0	18	0	0
ENST00000478753.4	chr16	377	-1	2506	1314	448	744	SEPHS2	TGA	TGAG	101.826	61.7127	39.8561	0.257136	396	240	155	1	40.6328	46.9655	88.9645	0.345613	0.00735887	105	11	0.257136	99	2.59733	0.055303
ENST00000267430.10	chr14	182	1	7086	6114	96	876	FANCM	TAA	TAAT	37.0276	36.7705	0.257136	0	144	143	1	0	5.22546	6.01414	2.6785	0	0	60	26	0	54	0	0
ENST00000325722.8	chr1	447	-1	4732	3117	219	1396	KIAA0319L	TAG	TAGC	32.3991	30.0849	2.05709	0.257136	126	117	8	1	6.84682	9.65188	9.3931	0.184195	0.0190838	183	13	0.257136	177	1.45275	0.150514
ENST00000537449.5	chr5	119	1	4374	1884	42	2448	GHR	TAG	TAGC	2.8285	2.8285	0	0	11	11	0	0	0.646661	1.50133	0	0	0	48	57	0	42	0	0
ENST00000409218.5	chr2	234	-1	603	408	132	63	MCFD2	TAG	TAGA	64.5411	64.284	0	0.257136	251	250	0	1	107.033	157.559	0	4.08152	0.0259048	45	5	0.257136	39	6.59323	0.0418462
ENST00000326446.9	chr2	688	1	2760	648	705	1407	ARL6IP6	TAA	TAAA	34.1991	33.942	0.257136	0	133	132	1	0	12.391	52.3796	0.364732	0	0	90	36	0	84	0	0
ENST00000292841.9	chr19	667	-1	8573	2277	253	6043	ZNF585A	TGA	TGAG	7.19981	2.31422	4.88558	0	28	9	19	0	0.839824	1.01635	19.3106	0	0	90	90	0	84	0	0
ENST00000237305.11	chr6	770	-1	2356	1263	83	1010	SGK1	TGA	TGAA	4.88558	4.88558	0	0	19	19	0	0	2.07368	3.86824	0	0	0	54	13	0	48	0	0
ENST00000373654.1	chr9	468	-1	2002	1293	206	503	ZBTB26	TGA	TGAG	4.62845	4.37131	0.257136	0	18	17	1	0	2.31191	3.38075	1.24823	0	0	84	12	0	78	0	0
ENST00000224652.10	chr10	614	-1	4885	1524	108	3253	ATE1	TGA	TGAC	19.2852	18.7709	0	0.514272	75	73	0	2	3.94784	12.3169	0	0.158092	0.0128354	39	60	0	33	0	0
ENST00000295206.6	chr2	584	-1	2412	1146	505	761	EN1	TAG	TAGC	6.94267	5.91413	1.02854	0	27	23	4	0	2.87839	5.16067	2.03672	0	0	156	5	0	150	0	0
ENST00000518235.5	chr5	762	-1	1199	657	4	538	MRNIP	TAA	TAAA	6.68554	6.68554	0	0	26	26	0	0	5.57593	10.1759	0	0	0	24	7	0	18	0	0
ENST00000513140.5	chr4	164	-1	4121	2178	464	1479	APBB2	TAG	TAGC	11.8283	8.74263	3.08563	0	46	34	12	0	2.87024	4.01406	6.65007	0	0	45	30	0	39	0	0
ENST00000323060.3	chr19	887	-1	2205	510	72	1623	OPA3	TAG	TAGG	4.37131	4.37131	0	0	17	17	0	0	1.98245	8.5712	0	0	0	30	20	0	24	0	0
ENST00000360321.7	chr20	5	-1	1531	1059	134	338	C20orf96	TAG	TAGA	7.19981	7.19981	0	0	28	28	0	0	4.70268	6.79869	0	0	0	99	2	0	93	0	0
ENST00000327473.9	chr19	143	1	3771	528	111	3132	TNFAIP8L1	TGA	TGAA	2.05709	1.79995	0.257136	0	8	7	1	0	0.545502	3.409	2.31654	0	0	123	29	0	117	0	0
ENST00000374467.4	chr6	311	-1	2125	603	277	1245	BAK1	TGA	TGAC	22.628	12.0854	10.0283	0.514272	88	47	39	2	10.6485	20.0421	36.2033	0.41307	0.0206101	51	12	0.257136	45	5.71413	0.285106
ENST00000285605.8	chr10	454	1	3168	489	141	2538	MARVELD1	TGA	TGAG	7.71408	4.88558	1.28568	1.54282	30	19	5	6	2.435	9.99097	9.1183	0.607887	0.0608436	342	24	0.771408	336	2.29586	0.229793
ENST00000320285.9	chr6	889	-1	7878	1104	207	6567	AGPAT4	TGA	TGAC	22.1137	16.7138	4.88558	0.514272	86	65	19	2	2.80702	15.1394	23.6019	0.0783116	0.00517272	66	93	0.257136	60	4.2856	0.283077
ENST00000446558.5	chr2	956	1	450	195	14	241	RPL37A	TAA	TAAC	673.182	671.382	1.79995	0	2618	2611	7	0	1495.96	3442.99	128.568	0	0	120	1	0	114	0	0
ENST00000617612.2	chr11	318	1	1202	336	262	604	C11orf96	TAA	TAAG	1.28568	1.28568	0	0	5	5	0	0	1.06962	3.82643	0	0	0	60	9	0	54	0	0
ENST00000223023.5	chr7	602	-1	4318	1485	263	2570	WASL	TGA	TGAT	32.142	27.5136	3.85704	0.771408	125	107	15	3	7.44373	18.5276	14.6656	0.300159	0.0162006	45	53	0.257136	39	6.59323	0.355859
[truncated: 8,428 more rows]

## Sheet: G418_rep1_countTable
#transcript	chrom	featnum	strand	mrnalen	cdslen	utr5len	utr3len	gene_name	stopcodon	stop4nt	mrnaCounts	cdsCounts	utr5Counts	utr3Counts	RAWmrnaCounts	RAWcdsCounts	RAWutr5Counts	RAWutr3Counts	mrnaDensity_rpkm	cdsDensity_rpkm	utr5Density_rpkm	utr3Density_rpkm	utr3_occupancy	utr3LenAdj	inframeStopCount	utr3AdjCounts	utr3LenAdjCalc	utr3AdjDensity_rpkm	RRTS
[truncated: 9,031 more rows]

[truncated: 1 more sheets: G418_rep2_countTable]
