# Supplementary material for: Stop codon context influences genome-wide stimulation of termination codon readthrough by aminoglycosides
Source: eLife. 2020 Jan 23;9:e52611. doi: 10.7554/eLife.52611 (PMC7089771; doi:10.7554/eLife.52611)
Supplement: Figure 5—source data 1. [file elife-52611-fig5-data1.xlsx]

## Sheet: Stop Codon Context PWMs
P values and Regression Coefficients for Stop Codon Contexts
	Untr - Adjusted P values						G418 - Adjusted P values						Untr -Regression Coefficient						G418 -Regression Coefficient
	Position	A / UAA	C / UAG	G / UGA	U		Position	A / UAA	C / UAG	G / UGA	U		Position	A / UAA	C / UAG	G / UGA	U		Position	A / UAA	C / UAG	G / UGA	U
	-15	-0.399796	-0.634327	0.329375	0.808346		-15	0.661523	-0.313616	-0.529992	-0.313616		-15	-0.00140206	-0.00170079	0.000201406	0.00290144		-15	0.00312385	-0.000270137	-0.00412915	0.00127543
	-14	0.306385	0.397363	0.360856	-0.491509		-14	1.6136	-0.313616	-0.737088	-0.909485		-14	-3.21235e-05	0.000466546	0.00105613	-0.00149055		-14	0.0116073	-0.00095839	-0.00458493	-0.00606395
	-13	0.634327	-0.422242	-0.910126	0.596236		-13	1.65332	-1.85827	-0.364617	0.377797		-13	0.0013269	-0.000562381	-0.00188176	0.00111724		-13	0.00919904	-0.00970544	-0.00160363	0.00211003
	-12	0.62239	-0.349666	-0.640917	0.422242		-12	0.74387	-0.344703	-0.313616	-0.754528		-12	0.00110948	-4.92171e-05	-0.00249319	0.00143293		-12	0.00550226	-0.00107183	-0.000505475	-0.00392495
	-11	0.474626	-0.479406	0.467164	-0.573271		-11	0.737088	0.313616	-0.819745	-0.336885		-11	0.00106074	-0.00093507	0.00145322	-0.00157889		-11	0.00442323	0.00175011	-0.00600733	-0.000166006
	-10	1.11463	-0.517976	-0.597319	-0.397363		-10	0.326915	-0.362213	-0.344703	0.386756		-10	0.00354792	-0.000823592	-0.00094009	-0.00178424		-10	5.49467e-05	-0.000321655	-0.000996878	0.00126359
	-9	-0.397363	0.622901	-0.634327	0.410299		-9	0.878287	0.867813	-0.867813	-1.18568		-9	-0.00141448	0.00281016	-0.00213201	0.000736328		-9	0.00678815	0.00491456	-0.00374151	-0.0079612
	-8	0.634327	-0.808346	-0.411487	0.397363		-8	-0.313616	0.313616	-0.313616	0.313616		-8	0.00240199	-0.0030955	1.06971e-05	0.00068281		-8	-7.22426e-05	-0.00129092	0.00276749	-0.00140432
	-7	0.48701	-0.479406	-1.25232	1.25232		-7	-0.938965	-0.878287	-0.352761	2.3591		-7	0.00012949	0.000410574	-0.00418337	0.0036433		-7	-0.0106426	-0.00198467	-0.000385044	0.0130123
	-6	0.410299	-1.35978	0.320942	0.808346		-6	0.353949	-1.65332	0.358312	0.938965		-6	0.000416842	-0.00323368	-0.000144653	0.00296149		-6	0.00172785	-0.00946025	-0.000399791	0.00813219
	-5	0.90876	-0.808346	0.306385	-0.634327		-5	1.77706	0.313616	-0.762359	-1.2126		-5	0.00372959	-0.00233494	0.000178015	-0.00157267		-5	0.0123868	0.000787194	-0.00693668	-0.00623727
	-4	0.648431	-1.35978	-0.622901	0.82606		-4	1.28754	0.313616	-1.16944	-0.336885		-4	0.0022097	-0.00328844	-0.00119733	0.00227607		-4	0.0081552	0.000200884	-0.00498389	-0.0033722
	-3	0.495035	0.421949	-1.35978	0.470039		-3	-0.864961	0.747817	-2.81673	2.87408		-3	0.00175094	0.000914234	-0.00421868	0.00155351		-3	-0.00582026	0.00521248	-0.015337	0.0159448
	-2	0.306385	-0.306385	-1.25232	0.634327		-2	-1.89955	0.59549	0.84809	0.415147		-2	3.79251e-06	0.000798009	-0.00284841	0.00204661		-2	-0.00957489	0.00222763	0.00659358	0.000753672
	-1	0.634327	-1.35978	0.349236	0.72831		-1	0.392726	0.353949	-2.69377	1.77706		-1	0.000654775	-0.00232838	0.00033035	0.00134325		-1	0.00229894	0.00192166	-0.0164724	0.0122518
	stop	-0.808346	-3.16549	3.36777	-		stop	-33.6855	-6.44565	45.7125	-		stop	-0.00408113	-0.00546913	0.00955027	-		stop	-0.0481932	-0.0154984	0.0636916	-
	4	-0.634327	6.09703	-6.05157	0.320942		4	-2.67356	26.5311	-20.4172	0.803042		4	-0.00421177	0.0133639	-0.00786818	-0.00128391		4	-0.0203467	0.0577602	-0.0411418	0.00372827
	5	1.35978	-1.35978	-3.36777	2.6546		5	2.71557	-2.10126	-2.4786	1.65332		5	0.00435062	-0.00403653	-0.00482529	0.0045112		5	0.0145526	-0.0146321	-0.00853704	0.00861657
	6	0.313146	-0.82606	0.470039	0.495035		6	0.938965	-0.938965	-0.737088	0.661523		6	1.29613e-07	-0.00166473	0.00175966	-9.50608e-05		6	0.00958646	-0.00684936	-0.00558904	0.00285194
	7	0.72831	-0.634327	-0.648431	0.640917		7	0.58898	0.362213	-5.19546	2.10126		7	0.00206871	-0.00164804	-0.00255787	0.0021372		7	0.00409139	0.000503333	-0.0187402	0.0141455
	8	0.634327	-0.934357	-0.410213	0.495035		8	0.383004	-0.938965	-1.32138	2.10126		8	0.00198333	-0.00211728	-0.000274811	0.000408763		8	0.00135601	-0.00504791	-0.00757503	0.0112669
	9	0.869188	-0.597319	-0.410299	-0.30703		9	2.71557	-5.39443	0.870657	-0.362213		9	0.00276874	-0.00135956	-0.000271528	-0.00113765		9	0.0172309	-0.020056	0.00638016	-0.00355503
	10	0.479406	-0.410299	-0.495035	0.470039		10	0.346352	-0.43039	0.364617	-0.313616		10	0.000322598	-0.000380052	-0.000495955	0.000553409		10	0.000545416	-0.0039568	0.00405741	-0.000646028
	11	0.634327	-1.35978	-0.400195	0.622901		11	1.00305	-0.762359	-0.882058	0.586042		11	0.00263918	-0.00300418	-3.78249e-05	0.000402817		11	0.00836175	-0.00313434	-0.00581468	0.000587268
	12	-0.410299	-0.634327	-0.410213	0.808346		12	-0.383004	-0.986712	0.938965	0.420442		12	-0.00153333	-0.00127903	-0.000108472	0.00292083		12	-0.00462609	-0.00777373	0.00887269	0.00352713
	13	0.622901	-0.869188	-0.622901	0.808346		13	1.7261	-0.944087	-1.65332	0.722163		13	0.00116704	-0.00267192	-0.00188121	0.00338609		13	0.0105339	-0.00752488	-0.010938	0.00792899
	14	0.808346	-0.517976	-1.70318	0.622901		14	1.86168	-0.43039	-1.65332	-0.307089		14	0.00290902	-0.000706766	-0.00386146	0.00165921		14	0.0105458	-0.000547113	-0.00948546	-0.000513211
	15	0.622901	-0.306385	-1.06936	0.517976		15	1.37865	-2.80216	-0.313616	0.71606		15	0.00175436	0.0011137	-0.00318587	0.000317822		15	0.00937401	-0.0121488	-0.00151147	0.00428629

## Sheet: Stop Codon Metagenes
position	NTC_rep1	3'TC_rep1	NTC_rep2	3'TC_rep2
-31	0.625593	0.205281	0.708407	0.239526
-30	1.21704	0.311339	1.17813	0.329722
-29	0.82523	0.184489	0.825096	0.207803
-28	0.671645	0.193839	0.737129	0.14622
-27	1.16481	0.303738	1.25216	0.324113
-26	0.864092	0.213547	0.858054	0.220335
-25	0.691108	0.165143	0.7135	0.152793
-24	1.21364	0.275118	1.27757	0.284557
-23	0.904485	0.207092	0.814826	0.171531
-22	0.64486	0.147918	0.670759	0.183748
-21	1.12275	0.296131	1.1569	0.30525
-20	0.824159	0.177278	0.856368	0.180544
-19	0.697741	0.174378	0.675751	0.125271
-18	1.17048	0.296245	1.22723	0.268279
-17	0.883378	0.216317	0.712291	0.207766
-16	0.740716	0.190316	0.733542	0.155624
-15	1.17014	0.252956	1.07075	0.266706
-14	0.867528	0.192664	0.798489	0.161974
-13	0.77332	0.203532	0.775025	0.183242
-12	1.08162	0.236179	1.02622	0.225712
-11	0.790604	0.167353	0.767942	0.184582
-10	0.694908	0.176832	0.649071	0.160818
-9	1.24033	0.294902	1.2961	0.312098
-8	0.933734	0.214392	0.980331	0.174227
-7	0.784187	0.222681	0.81656	0.157002
-6	1.38123	0.339714	1.46356	0.283117
-5	0.964034	0.225952	0.895922	0.180737
-4	0.724229	0.161859	0.730847	0.159675
-3	1.25559	0.312193	1.26257	0.265037
-2	0.94572	0.216542	0.914313	0.163667
-1	0.876154	0.209087	1.03014	0.15652
0	3.06393	0.592137	3.26495	0.5226
1	2.61416	0.483752	2.73771	0.459402
2	0.94888	0.202856	0.927624	0.199026
3	1.12689	0.205819	1.07426	0.186681
4	0.540404	0.127221	0.515884	0.0867638
5	0.323595	0.0952418	0.35185	0.0632181
6	0.531904	0.128063	0.425636	0.130103
7	0.338625	0.0953827	0.320353	0.120186
8	0.316089	0.103851	0.267478	0.0724259
9	0.415412	0.135863	0.387746	0.134015
10	0.329826	0.0967012	0.272426	0.107151
11	0.248324	0.0979803	0.23953	0.0591087
12	0.381433	0.155344	0.410022	0.117296
13	0.294747	0.11151	0.25865	0.0827255
14	0.290335	0.0963782	0.286535	0.0733785
15	0.491025	0.141572	0.46507	0.13252
16	0.292872	0.103359	0.279744	0.0792891
17	0.224374	0.0971907	0.207278	0.0742113
18	0.408311	0.104886	0.359353	0.113061
19	0.229634	0.116351	0.239351	0.0785848
20	0.223867	0.0999865	0.193788	0.0807275
21	0.376689	0.135264	0.390855	0.124673
22	0.287111	0.101631	0.268491	0.103475
23	0.222282	0.0757529	0.195752	0.0657051
24	0.334271	0.14212	0.415284	0.108082
25	0.247842	0.0696129	0.2264	0.0994787
26	0.191856	0.0813616	0.216757	0.0727286
27	0.367073	0.118481	0.379696	0.129262
28	0.22849	0.0919692	0.236393	0.101732
29	0.209382	0.0868882	0.215895	0.0740583
30	0.391606	0.0973089	0.348534	0.0965011
31	0.284487	0.0870286	0.239486	0.0921731
Upstream Average	0.923828	0.225382	0.923618	0.214567
Downstream Average	0.314128	0.106188	0.299939	0.095773
ratio	0.340029	0.471146	0.324743	0.446355
