# Supplementary material for: Stop codon context influences genome-wide stimulation of termination codon readthrough by aminoglycosides
Source: eLife. 2020 Jan 23;9:e52611. doi: 10.7554/eLife.52611 (PMC7089771; doi:10.7554/eLife.52611)
Supplement: Figure 6—source data 1. [file elife-52611-fig6-data1.xlsx]

## Sheet: Count_Table_Key
Figure 6 - source data - 1 Count Table Key	Figure 6 - source data - 1 Count Table Key
	Calu6 cells treated with G418
Column Title	Description
#transcript	Ensembl Transcript ID
chrom	Chromosome location of transcript
featnum	Arbitrary feature number of the transcript
strand	Chromosome strand
mrnalen	Total length of the spliced mRNA
cdslen	Length of coding region (CDS)
utr5len	Length of 5′ untranslated region (5′UTR)
utr3len	Length of 3′ untranslated region (3′UTR)
gene_name	Accepted name for the gene
stopcodon	Identity of the stopcodon: UAA, UAG, or UGA
stop4nt	Identity of the stopcodon including the nucleotide following the stop codon in the +4 position
mrnaCounts	Normalized ribosome counts mapping to the entire mRNA
cdsCounts	Normalized ribosome counts mapping to the CDS
utr5Counts	Normalized ribosome counts mapping to the 5′UTR
utr3Counts	Normalized ribosome counts mapping to the 3′UTR
RAWmrnaCounts	Raw ribosome counts mapping to the entire mRNA
RAWcdsCounts	Raw ribosome counts mapping to the CDS
RAWutr5Counts	Raw ribosome counts mapping to the 5′UTR
RAWutr3Counts	Raw ribosome counts mapping to the 3′UTR
mrnaDensity_rpkm	Density (counts in region divided by length of the region) of ribosome footprints on the mRNA
cdsDensity_rpkm	Density of ribosome footprints in the CDS
utr5Density_rpkm	Density of ribosome footprints in the 5′UTR
utr3Density_rpkm	Density of ribosome footprints in the 3′UTR
utr3_occupancy	Ratio of ribosome density in the entire 3′UTR to ribosome density in the CDS
utr3LenAdj	Adjusted length of 3′UTR including only the region between the NTC and first in-frame 3′TC, including the 3′TC
inframeStopCount	Total number of in-frame stop codons for this transcript
utr3AdjCounts	Normalized ribosome counts mapping to the 3′UTR in the adjusted region between the NTC and 3′TC
utr3LenAdjCalc	The length of the adjusted 3′UTR excluding the first 2 codons following the NTC
utr3AdjDensity_rpkm	Denstiy of ribosome footprints in adjusted 3′UTR region
RRTS	Ribosome Readthrough score (see Figure 2 - figure supplement 2B)

## Sheet: Calu6_Untr_RNAseq_rep1
#transcript	chrom	featnum	strand	mrnalen	cdslen	utr5len	utr3len	gene_name	stopcodon	stop4nt	mrnaCounts	cdsCounts	utr5Counts	utr3Counts	mrnaDensity	cdsDensity	utr5Density	utr3Density	utr3_occupancy
ENST00000222803.9	chr7	149	-1	4960	603	170	4142	FKBP14	TAG	TAGA	60.6202	6.17092	1.45198	52.6343	0.0122218	0.0102337	0.00854106	0.0127075	1.24173
ENST00000216962.9	chr20	150	1	4116	2499	88	1484	PYGB	TAG	TAGG	31.5806	9.80087	0	21.4167	0.00767264	0.00392192	0	0.0144317	3.67977
ENST00000381352.7	chr12	221	1	2320	1146	316	813	RASSF8	TAG	TAGA	205.818	176.779	25.7727	0.72599	0.0887148	0.154257	0.081559	0.000892977	0.00578889
ENST00000561312.5	chr15	418	-1	2938	672	31	2190	MESD	TGA	TGAT	23.2317	12.3418	0	10.1639	0.00790731	0.0183658	0	0.00464103	0.252699
ENST00000587340.5	chr19	1214	-1	2450	1458	690	257	ZSCAN5A	TGA	TGAT	3.62995	3.62995	0	0	0.00148161	0.00248968	0	0	0
ENST00000025301.4	chr13	113	1	9915	5673	170	4027	AKAP11	TAG	TAGA	91.8378	58.4422	0.72599	32.3066	0.00926251	0.0103018	0.00427053	0.00802249	0.778745
ENST00000451882.3	chr18	240	1	689	192	87	365	HSBP1L1	TAA	TAAC	2.17797	0	0	2.17797	0.00316106	0	0	0.00596704	0
ENST00000222982.8	chr7	439	-1	1720	1476	94	105	CYP3A5	TGA	TGAG	0.362995	0.362995	0	0	0.000211044	0.000245932	0	0	0
ENST00000258106.10	chr2	344	1	2188	840	372	931	EMX1	TAG	TAGG	0.362995	0	0	0.362995	0.000165903	0	0	0.000389898	0
ENST00000395422.4	chr7	255	-1	797	423	57	272	CHCHD2	TAA	TAAT	118.699	40.2925	6.53391	64.9761	0.148933	0.095254	0.11463	0.238883	2.50785
ENST00000574232.5	chr17	105	1	2129	1695	346	43	WSCD1	TGA	TGAT	4.35594	3.99295	0.362995	0	0.002046	0.00235572	0.00104912	0	0
ENST00000438911.6	chr8	599	-1	2020	1056	128	791	CYHR1	TAG	TAGG	1.45198	0.72599	0	0.72599	0.000718802	0.000687491	0	0.000917813	1.33502
ENST00000370873.9	chr20	421	-1	962	714	85	118	PSMA7	TGA	TGAT	71.873	70.0581	0.362995	0	0.0747121	0.0981205	0.00427053	0	0
ENST00000614428.4	chr17	427	-1	9554	7008	185	2316	ACACA	TAG	TAGG	184.039	94.7417	0.362995	88.2078	0.019263	0.0135191	0.00196214	0.0380863	2.81722
ENST00000322954.11	chr15	314	-1	6904	4218	145	2496	UACA	TAG	TAGC	162.259	140.116	0	22.1427	0.0235021	0.0332186	0	0.00887127	0.267057
ENST00000265849.12	chr7	47	-1	5093	2556	24	2468	PMS2	TGA	TGAC	21.7797	15.6088	0.362995	5.80792	0.0042764	0.00610673	0.0151248	0.00235329	0.385361
ENST00000509434.5	chr4	610	-1	385	96	47	197	NAF1	TGA	TGAA	1.81498	1.08899	0.362995	0.362995	0.00471422	0.0113436	0.0077233	0.00184261	0.162437
ENST00000371698.3	chr9	646	1	1282	789	62	386	EGFL7	TGA	TGAC	3.26696	1.08899	0	2.17797	0.00254833	0.00138021	0	0.00564241	4.08808
ENST00000403263.6	chr2	909	-1	14128	3051	391	10641	INO80D	TGA	TGAG	228.687	33.3956	3.26696	192.024	0.0161868	0.0109458	0.00835539	0.0180457	1.64865
ENST00000329021.9	chr22	309	-1	5602	780	32	4745	NFAM1	TAG	TAGG	0.72599	0	0	0.72599	0.000129595	0	0	0.000153001	0
ENST00000397666.6	chr16	22	-1	726	585	6	90	METTL26	TAG	TAGG	8.34889	7.6229	0	0	0.0114998	0.0130306	0	0	0
ENST00000525680.5	chr11	325	-1	2647	537	223	1842	TP53I11	TAG	TAGT	0.362995	0	0	0.362995	0.000137135	0	0	0.000197066	0
ENST00000474627.8	chr17	260	-1	1553	837	149	522	ATPAF2	TGA	TGAG	1.81498	0.362995	0	1.45198	0.00116869	0.000433686	0	0.00278157	6.41379
ENST00000335263.9	chr14	503	1	2616	1713	74	784	WDR20	TAG	TAGC	11.6158	9.80087	0.362995	0.72599	0.00444031	0.00572146	0.00490534	0.000926008	0.161848
ENST00000484457.5	chr3	134	1	3847	1239	85	2478	FBXL2	TGA	TGAC	11.9788	2.90396	0.362995	7.98589	0.00311381	0.00234379	0.00427053	0.00322272	1.375
ENST00000328333.12	chr3	264	-1	9276	8802	102	327	COL7A1	TGA	TGAG	13.0678	11.6158	0	1.45198	0.00140878	0.00131968	0	0.00444031	3.36468
ENST00000619929.5	chr17	650	-1	6132	2337	99	3651	PLCD3	TGA	TGAG	33.7585	17.7868	0	15.6088	0.00550531	0.00761094	0	0.00427521	0.561719
ENST00000371937.8	chr1	602	-1	1827	1023	30	729	ATPAF1	TAG	TAGA	17.0608	9.07488	0	7.6229	0.00933813	0.00887085	0	0.0104566	1.17877
ENST00000288532.11	chr12	841	-1	1506	951	11	499	COQ5	TAA	TAAT	11.6158	8.71188	0	2.90396	0.00771304	0.00916076	0	0.00581956	0.635271
ENST00000389629.8	chr15	101	1	5021	2100	6	2870	RTF1	TGA	TGAG	91.8378	44.6484	0	46.4634	0.0182907	0.0212611	0	0.0161893	0.761452
ENST00000265260.7	chr3	486	1	2342	504	115	1678	PCNP	TAA	TAAA	282.773	107.81	0.72599	163.348	0.12074	0.213908	0.00631296	0.0973467	0.455087
ENST00000263093.7	chr19	1277	-1	2292	2040	31	176	SLC27A5	TGA	TGAT	0.72599	0.72599	0	0	0.00031675	0.000355878	0	0	0
ENST00000305784.7	chr2	1145	-1	1051	606	26	374	DTYMK	TGA	TGAC	35.9365	22.1427	0	13.0678	0.0341927	0.0365391	0	0.0349407	0.956255
ENST00000426362.6	chr16	638	-1	965	417	269	234	TXNL4B	TAG	TAGT	2.90396	1.45198	0	1.08899	0.00300929	0.00348197	0	0.00465378	1.33654
ENST00000621441.5	chr14	240	-1	10486	2094	251	8096	EXOC5	TGA	TGAG	263.171	99.0977	1.81498	152.095	0.0250974	0.0473246	0.00723098	0.0187864	0.39697
ENST00000307767.13	chr17	276	1	1876	585	105	1141	TVP23B	TGA	TGAA	14.8828	5.80792	0	9.07488	0.00793326	0.00992807	0	0.00795344	0.801106
ENST00000421999.8	chr3	473	1	4302	807	112	3338	CMSS1	TAA	TAAG	41.3814	30.4916	2.54097	6.89691	0.00961912	0.0377839	0.0226872	0.00206618	0.0546842
ENST00000336498.7	chr4	562	1	3299	2328	233	693	ARHGAP10	TAG	TAGC	9.80087	7.98589	0	1.81498	0.00297086	0.00343037	0	0.00261901	0.763479
ENST00000251089.6	chr14	384	-1	5176	1980	107	3044	ANGEL1	TGA	TGAC	13.7938	1.45198	0	12.3418	0.00266496	0.000733323	0	0.00405448	5.52891
ENST00000265000.9	chr4	640	1	4249	1941	19	2244	GALNT7	TAG	TAGA	108.173	41.7444	0	65.3391	0.0254584	0.0215067	0	0.0291173	1.35387
ENST00000320152.11	chr10	103	-1	1939	645	25	1224	PRTFDC1	TAA	TAAA	211.263	79.8589	1.81498	123.055	0.108955	0.123812	0.072599	0.100535	0.811999
ENST00000371703.7	chr10	393	1	2589	774	265	1505	RPP30	TGA	TGAA	19.2387	16.3348	0	2.17797	0.00743095	0.0211044	0	0.00144716	0.0685714
ENST00000371927.7	chr10	379	1	4184	1353	952	1834	STAMBPL1	TGA	TGAG	50.0933	42.4704	6.89691	0	0.0119726	0.0313898	0.00724465	0	0
ENST00000302764.9	chr5	650	-1	7967	441	46	7435	NUDCD2	TAA	TAAC	19.6017	11.6158	0.72599	6.53391	0.00246037	0.0263398	0.0157824	0.000878805	0.0333642
ENST00000359316.6	chr1	1693	1	1335	741	257	292	2020-03-02	TGA	TGAC	1.81498	1.08899	0	0.72599	0.00135953	0.00146962	0	0.00248627	1.69178
ENST00000359644.7	chr3	653	1	3401	2817	123	416	ATP2C1	TAA	TAAG	93.6527	90.7488	0.362995	1.45198	0.0275368	0.0322147	0.00295118	0.00349034	0.108346
ENST00000355841.7	chr5	727	-1	1712	1341	82	244	PDLIM7	TGA	TGAG	9.07488	7.2599	0	1.81498	0.00530075	0.0054138	0	0.00743842	1.37398
ENST00000367888.8	chr1	1366	1	778	357	82	294	MGST3	TAA	TAAA	17.7868	13.4308	2.54097	0	0.0228622	0.0376213	0.0309874	0	0
ENST00000241600.10	chr9	623	1	1458	858	23	532	MRPS2	TGA	TGAT	30.8546	16.3348	0	13.7938	0.0211623	0.0190382	0	0.0259282	1.3619
ENST00000376834.8	chr9	242	-1	4259	1197	46	2971	CARNMT1	TAA	TAAT	70.4211	25.4097	0	42.8334	0.0165346	0.0212278	0	0.0144172	0.679165
ENST00000315757.9	chr15	305	-1	10191	3534	91	6521	ITGA11	TGA	TGAG	4.71894	1.45198	0	3.26696	0.000463049	0.00041086	0	0.00050099	1.21937
ENST00000596362.1	chr19	915	1	1203	417	130	611	CALM3	TGA	TGAA	173.149	94.7417	0	68.2431	0.143931	0.227198	0	0.111691	0.4916
ENST00000369851.6	chr1	888	1	27173	1032	100	25996	GNAI3	TGA	TGAG	178.231	37.3885	1.45198	137.938	0.00655911	0.0362292	0.0145198	0.00530613	0.14646
ENST00000434353.6	chrX	668	1	1524	408	561	510	CXorf40A	TAG	TAGA	1.81498	1.45198	0.362995	0	0.00119093	0.00355878	0.00064705	0	0
ENST00000374987.4	chrX	278	1	3239	1524	54	1616	APEX2	TGA	TGAA	5.44493	4.71894	0	0.72599	0.00168105	0.00309642	0	0.000449251	0.145088
ENST00000357495.4	chr13	174	1	1372	930	62	335	HNRNPA1L2	TAA	TAAT	23.2317	18.5128	2.17797	0.72599	0.0169327	0.0199062	0.0351286	0.00216714	0.108867
ENST00000241305.4	chr10	635	-1	3544	2238	142	1119	CPXM2	TGA	TGAC	0.362995	0	0	0.362995	0.000102425	0	0	0.000324392	0
ENST00000458356.6	chr21	140	-1	1877	1446	259	127	TMPRSS2	TAA	TAAT	0.362995	0.362995	0	0	0.000193391	0.000251034	0	0	0
ENST00000318158.11	chr9	184	1	1250	954	49	202	GRHPR	TAG	TAGC	27.9506	22.5057	0.72599	3.62995	0.0223605	0.0235909	0.0148161	0.0179701	0.761737
ENST00000614681.1	chr2	583	1	1347	684	133	485	INSIG2	TGA	TGAA	5.44493	3.26696	0	2.17797	0.00404226	0.00477625	0	0.00449066	0.940206
ENST00000328434.8	chr17	592	-1	780	288	17	430	COA3	TAA	TAAT	5.80792	0.362995	0.362995	4.71894	0.00744605	0.0012604	0.0213527	0.0109743	8.70698
ENST00000225983.10	chr17	624	-1	5326	3339	318	1624	HDAC5	TGA	TGAC	14.1568	14.1568	0	0	0.00265806	0.00423984	0	0	0
ENST00000596049.5	chr19	1006	-1	992	840	100	7	PIH1D1	TGA	TGAT	14.1568	13.4308	0	0	0.014271	0.0159891	0	0	0
ENST00000313552.10	chr2	1146	1	5196	690	20	4441	ING5	TAG	TAGG	15.2458	4.71894	0	10.1639	0.00293414	0.00683904	0	0.00228864	0.334644
ENST00000558966.5	chr15	148	1	1895	1368	119	363	CTDSPL2	TAA	TAAG	184.402	161.533	1.45198	14.1568	0.0973095	0.11808	0.0122015	0.0389995	0.330281
ENST00000359263.9	chr10	409	-1	6860	6153	134	528	MYOF	TAA	TAAC	312.902	270.794	2.17797	27.9506	0.0456125	0.0440101	0.0162535	0.0529368	1.20283
ENST00000285930.9	chr7	659	-1	1361	918	32	366	AKR1B1	TGA	TGAA	31.9436	19.6017	0	11.9788	0.0234707	0.0213527	0	0.0327291	1.53279
ENST00000261296.7	chr13	217	-1	1797	1020	10	722	TGDS	TAA	TAAT	39.5665	27.2246	0.72599	9.80087	0.0220181	0.0266908	0.072599	0.0135746	0.508587
ENST00000566625.2	chr16	375	1	2415	126	39	2205	ZNF771	TAG	TAGA	0.72599	0.72599	0	0	0.000300617	0.00576183	0	0	0
ENST00000292577.11	chr19	62	-1	1757	900	428	384	ABHD17A	TAG	TAGC	15.6088	13.0678	1.08899	1.45198	0.00888377	0.0145198	0.00254436	0.0037812	0.260417
ENST00000240306.5	chr17	721	1	2018	690	273	1010	DLX4	TGA	TGAA	0.362995	0	0	0.362995	0.000179879	0	0	0.000359401	0
ENST00000321407.3	chr7	611	-1	4128	2295	408	1380	GCC1	TGA	TGAT	5.80792	1.08899	0	4.71894	0.00140696	0.000474503	0	0.00341952	7.20652
ENST00000413459.7	chr16	103	1	2049	1752	63	189	AMDHD2	TGA	TGAG	0.362995	0	0	0.362995	0.000177157	0	0	0.00192061	0
ENST00000270357.10	chr2	1126	1	5761	2145	97	3474	RNPEPL1	TAG	TAGC	17.7868	9.80087	0	7.98589	0.00308744	0.00456917	0	0.00229876	0.503102
ENST00000367287.5	chr1	1553	1	1650	483	18	1104	TIMM17A	TAG	TAGG	58.4422	27.5876	0.362995	26.1356	0.0354195	0.0571172	0.0201664	0.0236736	0.414474
ENST00000388996.10	chr8	512	-1	11583	2586	557	8395	KCNQ3	TAA	TAAA	0.72599	0.362995	0	0.362995	6.26772e-05	0.000140369	0	4.32394e-05	0.308041
ENST00000261366.10	chr5	377	1	2890	1728	367	750	LMNB1	TAA	TAAA	133.219	96.9197	5.80792	29.7656	0.0460966	0.0560878	0.0158254	0.0396875	0.707596
ENST00000628904.2	chr2	701	1	3856	3594	121	96	PKP4	TGA	TGAA	188.031	174.601	6.17092	5.08193	0.0487633	0.0485811	0.0509993	0.0529368	1.08966
ENST00000409806.7	chr6	826	-1	5791	1551	313	3882	ZC3H12D	TAA	TAAG	2.90396	0	0	2.90396	0.000501461	0	0	0.000748058	0
ENST00000262613.10	chr17	900	1	1993	1044	213	691	SLC9A3R1	TGA	TGAG	21.0537	5.08193	0	14.8828	0.0105638	0.00486775	0	0.0215381	4.42464
ENST00000264932.11	chr5	3	1	2693	1962	30	656	SDHA	TGA	TGAT	23.2317	18.5128	0	4.71894	0.00862669	0.00943565	0	0.0071935	0.762374
ENST00000621654.1	chr17	445	-1	3719	1107	920	1647	EPOP	TGA	TGAC	9.80087	0.72599	0.362995	8.71188	0.00263535	0.000655818	0.00039456	0.00528955	8.06557
ENST00000354429.6	chr17	130	1	1304	918	101	240	ELP5	TGA	TGAC	18.5128	12.3418	0	4.35594	0.0141969	0.0134443	0	0.0181498	1.35
ENST00000396048.6	chr3	207	1	3099	783	431	1840	ZNF501	TAA	TAAA	3.62995	1.08899	0.362995	2.17797	0.00117133	0.00139079	0.000842216	0.00118368	0.851087
ENST00000575403.5	chr17	283	-1	928	411	328	144	B9D1	TGA	TGAA	1.08899	1.08899	0	0	0.00117348	0.0026496	0	0	0
ENST00000503569.5	chr4	63	1	3255	2640	161	409	WFS1	TGA	TGAG	2.90396	1.45198	0	1.45198	0.000892154	0.000549993	0	0.00355007	6.45477
ENST00000304430.9	chr4	501	-1	1169	918	28	178	NUDT6	TAA	TAAA	0.362995	0.362995	0	0	0.000310518	0.00039542	0	0	0
ENST00000485511.6	chr6	418	1	2973	1776	102	1050	PPP2R5D	TGA	TGAC	27.2246	15.2458	0.72599	10.8899	0.00915729	0.00858434	0.00711755	0.0103713	1.20816
ENST00000480567.5	chr1	1218	-1	895	519	157	174	SSR2	TGA	TGAT	50.4563	31.5806	0	13.4308	0.0563758	0.0608489	0	0.0771886	1.26853
ENST00000393860.7	chr17	568	-1	1912	618	450	799	RAB5C	TGA	TGAG	61.3462	29.0396	4.71894	26.8616	0.0320848	0.0469897	0.0104865	0.0336191	0.715457
ENST00000256441.5	chr5	195	1	1315	279	64	927	MRPS36	TAA	TAAC	11.9788	7.6229	0.362995	0.72599	0.00910938	0.0273222	0.0056718	0.000783161	0.0286639
ENST00000641251.1	chr11	383	1	1058	897	23	93	OR4C6	TAA	TAAC	0.362995	0.362995	0	0	0.000343096	0.000404677	0	0	0
ENST00000327532.7	chr3	686	-1	3492	2271	356	820	DZIP1L	TGA	TGAT	2.17797	1.81498	0	0.362995	0.000623703	0.000799197	0	0.000442677	0.553902
ENST00000305366.8	chr3	742	-1	1555	576	96	838	TM4SF1	TAA	TAAA	322.34	137.575	29.7656	143.383	0.207292	0.238846	0.310058	0.171102	0.716368
ENST00000380258.6	chr15	262	-1	911	165	67	634	PCLAF	TAA	TAAC	38.1145	12.7048	8.71188	11.2528	0.0418381	0.076999	0.130028	0.017749	0.230509
ENST00000392876.8	chr12	705	-1	7244	1614	72	5513	NT5DC3	TAG	TAGC	65.3391	3.99295	0	61.3462	0.00901976	0.00247394	0	0.0111275	4.4979
ENST00000232888.7	chr3	337	-1	1542	1395	31	71	RRP9	TGA	TGAC	2.90396	2.90396	0	0	0.00188324	0.00208169	0	0	0
ENST00000428879.5	chr2	676	-1	1726	858	499	324	MMADHC	TAG	TAGC	67.5171	54.0863	3.99295	7.2599	0.0391177	0.0630376	0.0080019	0.0224071	0.355456
ENST00000415641.7	chr1	862	-1	2485	1884	198	358	NBPF4	TGA	TGAA	0.362995	0	0	0.362995	0.000146074	0	0	0.00101395	0
ENST00000314128.9	chr12	490	-1	4405	2523	51	1786	STAT2	TAG	TAGG	3.26696	0.72599	0	2.54097	0.000741647	0.000287749	0	0.00142271	4.94429
ENST00000396825.4	chr20	280	-1	4628	756	48	3779	FITM2	TAA	TAAA	22.1427	1.81498	0	20.3277	0.00478451	0.00240076	0	0.00537913	2.24059
ENST00000606937.5	chr5	379	-1	607	384	41	137	C5orf63	TGA	TGAA	2.17797	1.81498	0.362995	0	0.00358809	0.0047265	0.00885354	0	0
ENST00000265038.9	chr5	170	-1	2017	1158	37	777	ERCC8	TGA	TGAA	13.4308	10.1639	0.72599	2.54097	0.00665881	0.00877708	0.0196214	0.00327023	0.372587
ENST00000371317.10	chrX	547	1	9577	513	130	8889	MCTS1	TGA	TGAG	12.3418	6.17092	2.54097	3.62995	0.0012887	0.0120291	0.0195459	0.000408364	0.0339481
ENST00000301475.1	chr19	243	-1	3014	1176	224	1569	ZNF558	TGA	TGAA	10.5269	4.35594	0	6.17092	0.00349265	0.00370403	0	0.00393303	1.06182
ENST00000419304.7	chr7	88	-1	1697	495	66	1091	AGR2	TAA	TAAA	72.599	47.1894	15.2458	6.17092	0.0427808	0.0953321	0.230997	0.0056562	0.0593316
ENST00000456936.4	chr5	346	-1	3918	642	238	2993	TMED7	TAA	TAAC	113.254	25.0467	0	87.1188	0.0289062	0.0390135	0	0.0291075	0.746089
ENST00000322810.8	chr8	573	-1	15249	14022	164	1018	PLEC	TGA	TGAG	98.7347	64.2501	0	34.1215	0.00647483	0.00458209	0	0.0335182	7.31504
ENST00000302097.3	chr22	71	-1	2148	1596	247	260	ZNF280A	TGA	TGAA	1.45198	1.08899	0	0.362995	0.000675969	0.000682322	0	0.00139614	2.04615
ENST00000474629.7	chr3	587	1	7694	5373	39	2237	PARP14	TAA	TAAC	57.3532	30.8546	0	26.4986	0.00745428	0.00574252	0	0.0118456	2.06279
ENST00000374198.4	chr9	414	1	2787	1536	96	1110	PRPF4	TAG	TAGA	60.6202	30.4916	3.62995	25.4097	0.0217511	0.0198513	0.037812	0.0228916	1.15315
ENST00000396056.7	chr3	205	1	2658	1551	224	838	ZNF35	TAA	TAAC	16.6978	7.98589	0	8.34889	0.00628208	0.00514887	0	0.00996287	1.93496
ENST00000219479.7	chr16	15	1	1000	531	18	406	NME4	TGA	TGAG	136.123	79.4959	0	46.8264	0.136123	0.14971	0	0.115336	0.770396
ENST00000193322.8	chr6	653	-1	4471	972	84	3370	OSTM1	TGA	TGAG	29.0396	3.99295	0	24.3207	0.0064951	0.00410797	0	0.00721682	1.75678
ENST00000221856.11	chr19	132	1	1833	1458	143	187	FSD1	TAG	TAGG	3.26696	2.90396	0	0.362995	0.0017823	0.00199174	0	0.00194115	0.974599
ENST00000631589.1	chr10	90	1	4955	3174	95	1641	MLLT10	TGA	TGAC	70.4211	44.6484	0	25.0467	0.0142121	0.0140669	0	0.015263	1.08503
ENST00000247986.2	chr1	251	-1	3969	3057	305	562	KIF17	TGA	TGAG	0.362995	0.362995	0	0	9.14576e-05	0.000118742	0	0	0
ENST00000373449.6	chr1	428	-1	3586	666	36	2839	AK2	TAG	TAGT	144.109	68.9691	2.54097	70.4211	0.0401866	0.103557	0.0705824	0.0248049	0.239528
ENST00000646620.1	chr15	486	-1	1309	507	406	351	HDDC3	TGA	TGAT	10.8899	6.53391	0	3.99295	0.00831922	0.0128874	0	0.0113759	0.882716
ENST00000263707.6	chr2	600	-1	9287	1407	87	7748	TFCP2L1	TGA	TGAG	2.54097	0	0	2.54097	0.000273605	0	0	0.000327951	0
ENST00000374878.5	chrX	300	-1	2217	1431	395	346	ARHGEF9	TAA	TAAG	6.89691	6.89691	0	0	0.00311092	0.00481964	0	0	0
ENST00000543824.5	chr12	111	1	4292	2982	326	939	PHC1	TAA	TAAG	41.3814	29.7656	2.90396	8.71188	0.00964153	0.00998176	0.00890786	0.00927783	0.929479
ENST00000613034.4	chr6	768	1	1625	528	599	453	TBPL1	TAA	TAAT	15.9718	11.6158	0	4.35594	0.00982879	0.0219997	0	0.00961576	0.437086
ENST00000264156.3	chr2	657	-1	3753	2433	72	1203	MCM6	TGA	TGAG	46.1004	34.8475	0	10.8899	0.0122836	0.0143229	0	0.00905225	0.632014
ENST00000281950.8	chr2	195	1	3705	471	85	3104	GEMIN6	TGA	TGAG	16.6978	7.2599	1.45198	7.98589	0.00450682	0.0154138	0.0170821	0.00257277	0.166914
ENST00000270221.11	chr19	953	1	649	459	68	77	EMP3	TGA	TGAG	26.1356	19.6017	3.99295	0	0.0402706	0.0427053	0.0587198	0	0
ENST00000212015.11	chr10	242	1	4107	2211	60	1791	SIRT1	TAG	TAGT	31.9436	19.2387	0	12.3418	0.00777784	0.00870138	0	0.00689103	0.791947
ENST00000317506.8	chr16	574	-1	5245	1830	18	3352	RANBP10	TAG	TAGC	25.4097	6.89691	0	18.5128	0.00484455	0.0037688	0	0.0055229	1.46543
ENST00000261700.8	chr14	210	1	7007	702	88	6172	RTRAF	TGA	TGAA	121.603	90.3858	8.34889	9.43787	0.0173546	0.128755	0.0948737	0.00152914	0.0118764
ENST00000403766.7	chr13	235	1	1375	1002	129	199	UBAC2	TGA	TGAT	51.5453	35.2105	2.17797	11.6158	0.0374875	0.0351402	0.0168835	0.0583711	1.66109
ENST00000249636.10	chr15	302	1	8115	1923	142	6005	PIAS1	TGA	TGAT	74.051	35.9365	0	35.5735	0.0091252	0.0186877	0	0.00592398	0.316998
ENST00000263150.8	chr10	7	1	4462	1452	145	2820	WDR37	TAA	TAAG	19.6017	11.2528	0	8.34889	0.00439304	0.0077499	0	0.0029606	0.382018
ENST00000319420.3	chr13	37	-1	2860	855	50	1910	SHISA2	TAA	TAAC	47.1894	13.0678	0	33.3956	0.0164998	0.015284	0	0.0174846	1.14398
ENST00000335255.10	chr17	1055	1	5243	1950	151	3097	FOXK2	TAG	TAGC	105.269	43.9224	0	58.4422	0.0200779	0.0225243	0	0.0188706	0.837788
ENST00000372836.4	chr6	415	1	1704	804	365	490	CNPY3	TGA	TGAG	8.34889	4.35594	0	3.99295	0.00489958	0.00541784	0	0.00814887	1.50408
ENST00000308521.10	chr22	258	1	4496	1089	91	3271	APOBEC3F	TGA	TGAG	11.9788	1.45198	0	10.5269	0.00266433	0.00133332	0	0.00321824	2.41371
ENST00000313143.9	chr3	870	1	5269	2118	253	2853	DVL3	TGA	TGAG	76.229	38.8405	0	36.2995	0.0144674	0.0183383	0	0.0127233	0.69381
ENST00000216489.8	chr14	400	-1	2597	1137	13	1402	ALKBH1	TGA	TGAG	13.4308	6.17092	0	5.44493	0.00517167	0.00542737	0	0.00388369	0.715574
ENST00000323468.10	chr11	918	-1	4253	1491	12	2705	KDELC2	TGA	TGAG	171.334	60.9832	0	109.625	0.0402854	0.0409009	0	0.0405266	0.99085
ENST00000354955.5	chr1	1576	-1	2943	1098	91	1709	FMOD	TGA	TGAG	0.362995	0	0	0.362995	0.000123342	0	0	0.000212402	0
ENST00000221980.5	chr19	274	1	3029	2742	86	156	ICAM5	TGA	TGAG	0.362995	0.362995	0	0	0.00011984	0.000132383	0	0	0
ENST00000354371.7	chr2	1100	1	3438	597	70	2726	COPS8	TGA	TGAT	204.366	82.7629	4.35594	113.254	0.0594434	0.138631	0.0622277	0.041546	0.299687
ENST00000539410.2	chr12	685	1	2229	2052	125	7	GAS2L3	TAA	TAAA	54.0863	52.6343	0.362995	0.72599	0.0242648	0.0256502	0.00290396	0.103713	4.04335
ENST00000564845.5	chr16	459	1	11504	8613	296	2550	CHD9	TGA	TGAT	176.053	121.24	1.81498	52.2713	0.0153036	0.0140764	0.00613167	0.0204985	1.45623
ENST00000358536.8	chr3	258	-1	7308	6375	264	624	PLXNB1	TAG	TAGG	1.81498	1.81498	0	0	0.000248355	0.000284702	0	0	0
ENST00000444614.8	chr13	119	-1	2059	789	303	922	CCDC122	TAA	TAAC	4.71894	3.99295	0.362995	0	0.00229186	0.00506077	0.001198	0	0
ENST00000368759.5	chr10	648	1	1433	936	6	446	BCCIP	TAA	TAAT	38.1145	35.9365	0	0	0.0265977	0.0383937	0	0	0
ENST00000586895.5	chr19	261	1	432	189	98	100	UBL5	TAG	TAGA	44.6484	32.3066	8.71188	0.362995	0.103353	0.170934	0.0888968	0.00362995	0.021236
ENST00000582556.5	chr17	191	-1	763	405	304	9	RPL26	TAA	TAAA	770.276	724.538	21.4167	0	1.00954	1.78898	0.0704497	0	0
ENST00000343484.10	chr20	472	1	1182	867	109	161	TCEA2	TGA	TGAC	6.89691	5.44493	0.72599	0.362995	0.00583495	0.00628019	0.00666046	0.00225463	0.359006
ENST00000620429.4	chr11	1010	1	2739	1422	1199	73	VPS11	TAG	TAGC	4.71894	3.62995	1.08899	0	0.00172287	0.00255271	0.000908245	0	0
ENST00000288490.9	chr7	676	-1	3895	3165	-5	690	DGKI	TGA	TGAC	1.08899	1.08899	1.08899	0	0.000279585	0.000344071	-0.217797	0	0
ENST00000380243.9	chr14	485	-1	16564	1227	242	15050	CCDC85C	TAG	TAGG	57.3532	2.17797	0	55.1753	0.00346252	0.00177504	0	0.00366613	2.06538
ENST00000496811.6	chr3	769	-1	6723	2994	65	3619	DHX36	TGA	TGAC	88.2078	30.8546	0	56.9902	0.0131203	0.0103055	0	0.0157475	1.52807
ENST00000308683.3	chr5	53	-1	1707	1401	129	132	ZNF622	TGA	TGAG	4.35594	3.26696	0	0.72599	0.00255181	0.00233187	0	0.00549993	2.35859
ENST00000378572.8	chr10	57	1	1670	996	116	513	PRPF18	TGA	TGAG	18.5128	13.4308	3.26696	1.08899	0.0110855	0.0134848	0.0281634	0.00212278	0.157421
ENST00000570984.7	chr17	16	-1	3857	3054	55	703	MYO1C	TGA	TGAT	64.9761	34.4845	0.362995	28.3136	0.0168463	0.0112916	0.00659991	0.0402754	3.56685
ENST00000340992.4	chr19	273	1	1176	786	33	312	ICAM4	TGA	TGAC	0.72599	0	0	0.72599	0.000617339	0	0	0.00232689	0
ENST00000300289.10	chr15	141	1	3680	1485	96	2054	PDIA3	TAA	TAAA	208.722	185.853	0	19.2387	0.056718	0.125154	0	0.00936648	0.0748397
ENST00000337080.8	chr19	1210	1	1943	951	261	686	ZNF444	TAG	TAGC	2.90396	0	1.08899	1.81498	0.00149458	0	0.00417236	0.00264574	0
ENST00000342502.6	chr12	675	-1	1645	1020	406	174	IKBIP	TAG	TAGT	17.0608	15.2458	1.08899	0	0.0103713	0.0149469	0.00268223	0	0
ENST00000372970.6	chr20	278	-1	1616	846	175	550	OSER1	TGA	TGAT	15.9718	12.3418	0	3.62995	0.00988353	0.0145885	0	0.00659991	0.452406
ENST00000353487.7	chr12	848	-1	4135	1122	485	2483	SPPL3	TGA	TGAT	19.9647	8.34889	0	11.2528	0.00482823	0.00744108	0	0.00453196	0.609046
ENST00000645843.1	chr4	511	1	5827	1362	312	4108	ABHD18	TAG	TAGT	19.2387	9.80087	0.362995	8.71188	0.00330165	0.00719594	0.00116345	0.00212071	0.29471
ENST00000262304.8	chr16	88	-1	14138	12879	203	1011	PKD1	TAG	TAGT	15.2458	13.0678	0	2.17797	0.00107836	0.00101466	0	0.00215427	2.12315
ENST00000334690.11	chr4	665	1	4523	3369	170	939	TRAPPC11	TGA	TGAT	16.6978	14.1568	0	2.54097	0.00369175	0.00420208	0	0.00270603	0.643975
ENST00000328736.7	chr14	415	-1	6089	3492	199	2353	AL162171.1	TAA	TAAG	22.5057	9.80087	0.362995	12.3418	0.00369612	0.00280666	0.0018241	0.00524515	1.86882
ENST00000357775.5	chr18	36	1	2830	1428	229	1128	TXNDC2	TAA	TAAA	0.362995	0.362995	0	0	0.000128267	0.000254198	0	0	0
ENST00000405260.5	chr2	1135	-1	4942	3939	693	265	PASK	TAA	TAAA	1.08899	1.08899	0	0	0.000220353	0.000276462	0	0	0
ENST00000395332.7	chr7	272	1	1622	1362	202	13	ASL	TAG	TAGG	3.99295	3.99295	0	0	0.00246174	0.00293168	0	0	0
ENST00000450471.6	chr2	891	1	3659	1257	80	2277	CDK15	TGA	TGAA	25.0467	7.2599	0	17.4238	0.00684522	0.00577558	0	0.00765207	1.3249
ENST00000523829.5	chr8	514	-1	1974	909	116	904	TMEM71	TAA	TAAT	0.72599	0.72599	0	0	0.000367776	0.000798669	0	0	0
ENST00000331952.6	chr14	530	1	1455	501	250	659	C14orf180	TGA	TGAA	0.362995	0	0.362995	0	0.000249481	0	0.00145198	0	0
ENST00000337975.6	chr15	452	-1	3650	1737	164	1704	KLHL25	TGA	TGAG	2.54097	0.362995	0	2.17797	0.000696155	0.000208978	0	0.00127815	6.1162
ENST00000551736.5	chr12	274	1	1684	1350	107	182	IRAK4	TAA	TAAA	7.6229	3.99295	0.72599	2.90396	0.00452666	0.00295774	0.00678496	0.0159558	5.39461
ENST00000361891.9	chr1	1156	-1	1852	1140	65	602	ILF2	TGA	TGAC	164.8	121.24	3.26696	34.1215	0.0889848	0.106351	0.0502609	0.0566803	0.532954
ENST00000340344.4	chr21	156	1	4676	294	60	4277	NDUFV3	TGA	TGAG	25.0467	4.71894	0	19.2387	0.00535643	0.0160508	0	0.00449819	0.280247
ENST00000506163.5	chr5	205	1	1445	816	3	581	SMN1	TAG	TAGA	8.71188	5.44493	0	3.26696	0.00602898	0.0066727	0	0.00562299	0.842685
ENST00000322583.5	chr6	896	-1	3093	855	244	1949	PRR18	TGA	TGAG	0.72599	0	0	0.72599	0.00023472	0	0	0.000372494	0
ENST00000394440.8	chr2	278	-1	2376	1587	143	601	CCT4	TAA	TAAT	176.053	157.177	8.34889	7.6229	0.0740962	0.0990403	0.0583838	0.0126837	0.128066
ENST00000251108.10	chr13	150	1	3386	1512	107	1722	CDADC1	TAA	TAAG	3.62995	1.81498	0.362995	1.45198	0.00107205	0.00120038	0.00339248	0.000843194	0.702439
ENST00000504548.3	chr8	561	1	5390	1896	63	3386	TIGD5	TGA	TGAC	2.90396	0.362995	0	2.54097	0.000538768	0.000191453	0	0.000750433	3.91967
ENST00000589666.6	chr17	936	1	3890	2400	69	1376	UNK	TGA	TGAC	9.80087	6.17092	0	3.62995	0.0025195	0.00257122	0	0.00263805	1.02599
ENST00000372771.5	chr1	503	1	6232	5712	7	468	RLF	TAA	TAAG	30.1286	28.6766	0	1.45198	0.0048345	0.00502042	0	0.00310252	0.617981
ENST00000564146.3	chr3	56	-1	985	639	86	215	MKRN2OS	TGA	TGAG	0.72599	0.362995	0	0.362995	0.000737046	0.000568067	0	0.00168835	2.97209
ENST00000397382.8	chr14	70	-1	1986	1584	277	80	C14orf93	TAA	TAAA	2.90396	2.90396	0	0	0.00146222	0.00183331	0	0	0
ENST00000421239.7	chr19	1104	1	6768	1740	261	4722	ZNF578	TAG	TAGA	0.362995	0	0	0.362995	5.3634e-05	0	0	7.68732e-05	0
ENST00000482354.5	chrX	57	1	1870	1428	68	329	MOSPD2	TAA	TAAG	11.9788	10.8899	0	0.72599	0.0064058	0.00762595	0	0.00220666	0.289362
ENST00000332585.11	chr22	163	1	4261	2718	30	1468	OSBP2	TGA	TGAG	16.6978	7.6229	0	8.71188	0.00391875	0.0028046	0	0.00593453	2.116
ENST00000394815.3	chr12	373	-1	3873	1326	106	2396	KRT80	TAA	TAAG	7.98589	1.81498	0	5.80792	0.00206194	0.00136876	0	0.00242401	1.77095
ENST00000399218.8	chr18	102	-1	7033	2595	50	4343	GAREM1	TAG	TAGC	11.2528	4.71894	0	6.53391	0.00160001	0.00181847	0	0.00150447	0.827326
ENST00000266503.9	chr12	231	1	2291	1878	12	356	ARNTL2	TAG	TAGC	173.512	158.266	0.72599	11.6158	0.0757362	0.0842736	0.0604992	0.0326288	0.387177
ENST00000379485.1	chr13	106	-1	5178	1992	229	2912	KBTBD6	TGA	TGAA	28.6766	9.07488	0	19.6017	0.00553816	0.00455566	0	0.00673137	1.47758
ENST00000326925.10	chr3	277	1	2012	522	1128	317	NDUFAF3	TGA	TGAA	15.2458	13.7938	0	0.362995	0.00757743	0.0264249	0	0.0011451	0.0433339
ENST00000442287.6	chr15	463	-1	4487	3687	330	425	POLG	TAG	TAGC	12.7048	8.71188	0	3.62995	0.00283148	0.00236286	0	0.00854106	3.61471
ENST00000257215.10	chr11	501	1	5799	3096	152	2506	DAGLA	TAG	TAGC	8.34889	1.45198	0	6.89691	0.00143971	0.000468986	0	0.00275216	5.86832
ENST00000378887.3	chr19	640	1	1117	315	70	687	SDHAF1	TGA	TGAC	7.2599	0	0	7.2599	0.00649946	0	0	0.0105675	0
ENST00000521367.5	chr5	521	1	1780	666	745	324	RELL2	TGA	TGAT	6.17092	4.71894	0	1.45198	0.00346681	0.00708549	0	0.00448142	0.632479
ENST00000302190.9	chr8	402	1	3307	573	453	2236	SDC2	TAA	TAAA	0.362995	0	0	0.362995	0.000109766	0	0	0.000162341	0
ENST00000346618.8	chr6	86	1	5036	1365	348	3278	E2F3	TGA	TGAT	86.3928	17.0608	0	69.3321	0.0171551	0.0124987	0	0.0211507	1.69223
ENST00000506380.5	chr4	55	1	798	525	186	42	NSG1	TAG	TAGC	1.45198	1.45198	0	0	0.00181952	0.00276568	0	0	0
ENST00000397411.6	chr11	39	1	1025	684	115	181	TSPAN4	TAG	TAGG	2.90396	2.54097	0	0	0.00283313	0.00371486	0	0	0
ENST00000393114.7	chr7	665	-1	1482	441	176	820	CYREN	TAG	TAGG	32.3066	7.6229	3.62995	20.6907	0.0217993	0.0172855	0.0206247	0.0252326	1.45976
ENST00000428984.6	chr15	16	-1	2986	2526	390	25	UBE3A	TAA	TAAA	203.277	186.216	11.6158	1.81498	0.0680768	0.0737199	0.0297842	0.072599	0.984795
ENST00000330062.7	chr15	474	-1	2694	1326	108	1215	IDH2	TAG	TAGG	18.1498	11.6158	0	6.17092	0.0067371	0.00876006	0	0.00507894	0.579784
ENST00000599845.3	chrX	700	1	844	351	147	301	CSAG3	TAA	TAAA	0.362995	0.362995	0	0	0.000430089	0.00103417	0	0	0
ENST00000618742.2	chr8	13	-1	4893	2028	145	2675	XKR5	TGA	TGAC	0.72599	0.362995	0	0.362995	0.000148373	0.000178992	0	0.000135699	0.758131
ENST00000356853.9	chr2	990	-1	2094	867	128	1054	NHEJ1	TAA	TAAT	13.7938	7.2599	0	6.17092	0.0065873	0.00837359	0	0.00585476	0.699194
ENST00000369902.7	chr10	518	1	5001	1422	160	3374	SUFU	TAG	TAGC	5.08193	0	0	5.08193	0.00101618	0	0	0.0015062	0
ENST00000614467.4	chr6	411	1	6510	3207	320	2938	BICRAL	TAA	TAAT	20.3277	10.5269	0.362995	9.43787	0.00312254	0.00328246	0.00113436	0.00321235	0.978639
ENST00000391764.7	chr19	1134	1	267	213	4	5	NDUFA3	TGA	TGAG	22.5057	18.5128	0.362995	0	0.084291	0.0869143	0.0907488	0	0
ENST00000357122.8	chr17	747	-1	4761	3891	203	622	SPAG9	TGA	TGAG	147.739	121.24	0	26.1356	0.0310311	0.0311592	0	0.0420187	1.34852
ENST00000543341.7	chr12	898	1	3327	894	25	2363	GTF2H3	TGA	TGAG	97.6457	39.9295	1.45198	55.1753	0.0293495	0.0446638	0.0580792	0.0233497	0.522787
ENST00000392951.8	chr11	975	1	928	573	118	192	TAGLN	TAG	TAGA	0.72599	0.362995	0	0.362995	0.000782317	0.000633499	0	0.0018906	2.98438
ENST00000375442.8	chrX	260	1	2815	2049	126	595	TSPYL2	TAA	TAAG	2.54097	1.81498	0.362995	0.362995	0.000902652	0.000885786	0.00288091	0.000610076	0.688739
ENST00000407249.7	chr1	41	-1	2677	2355	106	171	CDK11B	TGA	TGAA	13.4308	13.0678	0	0.362995	0.00501712	0.00554897	0	0.00212278	0.382554
ENST00000245105.8	chr4	80	1	4303	3978	138	142	SH3TC1	TGA	TGAG	1.08899	1.08899	0	0	0.000253076	0.000273752	0	0	0
ENST00000307365.4	chr10	290	1	1744	666	191	842	DDIT4	TGA	TGAA	1.81498	0.362995	0.72599	0.72599	0.0010407	0.000545038	0.003801	0.000862221	1.58195
ENST00000269260.7	chr17	70	1	1778	1197	84	452	ARRB2	TAG	TAGG	74.051	46.8264	1.08899	25.4097	0.0416485	0.0391198	0.0129641	0.0562161	1.43702
ENST00000279907.12	chr12	679	-1	5198	4362	233	558	UHRF1BP1L	TAG	TAGC	62.4352	55.1753	0.362995	6.17092	0.0120114	0.0126491	0.00155792	0.011059	0.874293
ENST00000341653.6	chr14	292	-1	330	219	42	24	MAX	TAA	TAAT	13.7938	11.9788	0.72599	0	0.0417994	0.0546979	0.0172855	0	0
ENST00000398073.7	chr12	539	-1	4785	783	288	3669	CTDSP2	TAG	TAGC	474.072	80.5849	3.62995	385.501	0.0990745	0.102918	0.012604	0.10507	1.02091
ENST00000258229.14	chr1	1780	-1	7530	6381	241	863	PCNX2	TGA	TGAC	20.6907	18.8757	0	1.81498	0.00274777	0.00295812	0	0.0021031	0.710959
ENST00000395284.7	chr10	227	1	1913	861	136	871	CDK1	TAG	TAGC	96.1937	63.8871	5.80792	23.9577	0.0502842	0.0742011	0.0427053	0.0275059	0.370695
ENST00000280020.10	chr18	122	1	4853	1701	6	3101	KIAA1328	TGA	TGAC	3.99295	1.08899	0	2.90396	0.000822779	0.000640203	0	0.00093646	1.46275
ENST00000397861.7	chr17	762	-1	2037	240	1298	454	C17orf67	TAA	TAAG	1.08899	0	1.08899	0	0.000534603	0	0.000838972	0	0
ENST00000370630.6	chr1	769	-1	6571	1125	19	5382	CTBS	TGA	TGAA	21.4167	13.4308	0	7.6229	0.00325928	0.0119385	0	0.00141637	0.118639
ENST00000292782.8	chr3	856	-1	7954	747	148	7014	DCUN1D1	TAG	TAGC	126.685	47.1894	1.45198	75.503	0.0159272	0.0631718	0.00981068	0.0107646	0.170402
ENST00000530277.5	chr11	1044	-1	3984	615	401	2923	SCN3B	TAG	TAGA	0.362995	0	0	0.362995	9.11132e-05	0	0	0.000124186	0
ENST00000555761.5	chr14	401	-1	1855	1683	23	104	SNW1	TGA	TGAA	39.9295	36.6625	0	1.81498	0.0215253	0.021784	0	0.0174517	0.801123
ENST00000406438.5	chr17	269	1	8297	2781	491	4980	SMCR8	TGA	TGAG	71.51	11.2528	0.362995	59.8942	0.00861878	0.00404633	0.000739298	0.0120269	2.97231
ENST00000298295.3	chr10	163	-1	2120	606	212	1257	DEPP1	TGA	TGAC	1.45198	0	0	1.45198	0.000684896	0	0	0.00115512	0
ENST00000333602.12	chr3	947	-1	4476	3084	537	810	TNK2	TGA	TGAG	16.3348	11.6158	0	3.99295	0.00364941	0.00376649	0	0.00492956	1.3088
ENST00000229332.11	chr12	101	1	1281	681	241	314	CLEC4A	TGA	TGAA	0.362995	0.362995	0	0	0.000283369	0.000533032	0	0	0
ENST00000258975.7	chr17	825	1	1446	861	183	357	TACO1	TAA	TAAC	6.53391	5.44493	0	0.72599	0.00451861	0.00632396	0	0.00203359	0.321569
ENST00000299339.3	chr13	221	1	2466	654	28	1739	CLDN10	TAA	TAAA	18.5128	10.8899	0.362995	6.89691	0.0075072	0.0166512	0.0129641	0.00396602	0.238183
ENST00000535621.6	chr16	219	1	2048	1464	182	357	PDXDC1	TGA	TGAG	18.8757	15.6088	1.81498	0	0.00921667	0.0106617	0.00997239	0	0
ENST00000219302.7	chr16	64	-1	1069	477	190	357	NME3	TAG	TAGC	1.08899	0.362995	0	0.72599	0.0010187	0.000760996	0	0.00203359	2.67227
ENST00000406652.5	chr2	208	1	5484	1581	316	3542	MTA3	TGA	TGAG	21.7797	17.0608	1.45198	3.26696	0.0039715	0.0107911	0.00459487	0.000922348	0.0854728
ENST00000298289.6	chr14	187	-1	746	288	154	259	RPL36AL	TAA	TAAA	152.095	108.899	35.5735	0	0.203881	0.37812	0.230997	0	0
ENST00000450142.7	chr12	616	-1	5620	3060	160	2355	PPP1R12A	TAA	TAAA	91.8378	54.0863	0.362995	35.9365	0.0163412	0.0176753	0.00226872	0.0152597	0.863335
ENST00000358697.5	chrX	298	-1	4113	2367	394	1307	ZXDA	TGA	TGAA	1.08899	0.362995	0	0.72599	0.000264767	0.000153357	0	0.000555463	3.62204
ENST00000222122.9	chr19	965	-1	2229	945	438	801	DBP	TGA	TGAG	1.45198	1.45198	0	0	0.000651404	0.00153649	0	0	0
ENST00000425146.5	chrX	500	1	2477	1602	365	465	PAK3	TAA	TAAG	1.08899	0.72599	0	0	0.000439639	0.000453177	0	0	0
ENST00000262306.11	chr16	109	-1	582	453	32	52	ELOB	TAA	TAAT	90.3858	78.7699	6.17092	0	0.155302	0.173885	0.192841	0	0
ENST00000617859.4	chr10	629	-1	4542	1227	304	2966	IKZF5	TGA	TGAT	27.5876	14.8828	0.362995	11.9788	0.00607389	0.0121294	0.00119406	0.00403872	0.332969
ENST00000320776.4	chr4	70	1	1617	621	149	802	BLOC1S4	TGA	TGAC	3.99295	0.72599	0	3.26696	0.00246935	0.00116907	0	0.00407351	3.48441
ENST00000405938.5	chr22	116	-1	2896	2481	349	21	TFIP11	TGA	TGAA	3.26696	3.26696	0	0	0.00112809	0.00131679	0	0	0
ENST00000268182.10	chr15	480	1	7205	4941	94	2125	IQGAP1	TAA	TAAT	306.005	123.055	0.362995	170.971	0.0424712	0.0249049	0.00386165	0.0804568	3.23055
ENST00000265334.9	chr5	422	-1	2222	1746	210	221	CDKL3	TAG	TAGT	1.81498	1.45198	0	0.362995	0.000816821	0.000831604	0	0.00164251	1.97511
ENST00000643483.1	chr13	298	1	5122	2406	1637	1034	CHAMP1	TGA	TGAT	10.5269	7.98589	0	2.54097	0.00205522	0.00331916	0	0.00245741	0.740373
ENST00000260753.8	chr10	391	1	6306	5310	66	885	KIF20B	TAA	TAAA	80.2219	60.2572	0.72599	19.2387	0.0127215	0.0113479	0.0109999	0.0217387	1.91566
ENST00000375915.3	chr13	258	-1	8503	1344	133	6981	FAM155A	TAA	TAAC	0.362995	0	0	0.362995	4.26902e-05	0	0	5.19976e-05	0
ENST00000429967.3	chrX	574	-1	3224	201	320	2658	APLN	TGA	TGAA	0.362995	0	0	0.362995	0.000112592	0	0	0.000136567	0
ENST00000357460.6	chr14	80	-1	4971	1620	159	3147	HOMEZ	TGA	TGAG	17.4238	8.71188	0	8.71188	0.00350508	0.00537771	0	0.00276831	0.514776
ENST00000281834.4	chr1	1424	-1	3492	519	149	2779	TNFSF4	TGA	TGAG	0.362995	0.362995	0	0	0.00010395	0.000699413	0	0	0
ENST00000416476.6	chr3	496	1	2178	1854	214	65	BBX	TAG	TAGT	91.8378	81.6739	5.44493	3.99295	0.0421661	0.0440528	0.0254436	0.0614299	1.39446
ENST00000376300.7	chr2	582	-1	6833	1863	69	4856	CCDC93	TGA	TGAA	89.2968	20.3277	0.362995	68.2431	0.0130685	0.0109113	0.0052608	0.0140534	1.28796
ENST00000309733.6	chr4	460	1	8844	366	121	8312	FAM241A	TAA	TAAA	82.7629	11.6158	0	71.147	0.00935808	0.0317373	0	0.00855956	0.2697
ENST00000251810.7	chr8	430	-1	4931	1023	238	3625	RRM2B	TAA	TAAA	53.3603	6.17092	0.362995	46.8264	0.0108214	0.00603218	0.00152519	0.0129176	2.14145
ENST00000396813.5	chr14	114	-1	1470	909	263	253	DHRS1	TAA	TAAC	0.72599	0.72599	0	0	0.000493871	0.000798669	0	0	0
ENST00000394809.9	chr16	432	-1	8033	2427	145	5416	MYLK3	TAA	TAAT	13.0678	2.17797	0	10.8899	0.00162677	0.000897392	0	0.00201068	2.24058
ENST00000243189.12	chr1	304	-1	1425	840	206	334	RSRP1	TAA	TAAA	2.54097	2.17797	0	0.362995	0.00178313	0.00259282	0	0.00108681	0.419162
ENST00000266058.9	chr10	440	-1	7964	4572	279	3068	SLIT1	TAG	TAGC	0.362995	0	0	0.362995	4.55795e-05	0	0	0.000118317	0
ENST00000243644.9	chr19	1090	-1	2355	1566	236	508	ZNF350	TAG	TAGG	6.89691	5.08193	0.72599	1.08899	0.00292862	0.00324517	0.00307623	0.00214367	0.660574
ENST00000272418.7	chr2	444	-1	3298	1260	11	1982	MRPS5	TAA	TAAC	27.2246	25.7727	0	0.362995	0.00825489	0.0204545	0	0.000183146	0.00895382
ENST00000358268.6	chr21	131	-1	2564	1980	523	16	LCA5L	TAA	TAAA	0.362995	0.362995	0	0	0.000141574	0.000183331	0	0	0
ENST00000298355.7	chr14	206	-1	5284	2100	1116	2023	TRIM9	TAA	TAAG	20.3277	9.07488	0.362995	10.5269	0.00384703	0.00432137	0.000325264	0.00520359	1.20415
ENST00000408912.7	chr16	416	1	3626	3060	311	210	ARMC5	TAG	TAGA	1.45198	0.72599	0	0.362995	0.000400436	0.000237252	0	0.00172855	7.28571
ENST00000304330.9	chr15	104	-1	4663	4149	109	360	RPAP1	TAG	TAGG	12.7048	9.07488	0	3.62995	0.0027246	0.00218724	0	0.0100832	4.61
ENST00000372466.8	chrX	479	-1	1755	522	246	942	NUP62CL	TGA	TGAA	2.90396	1.81498	0	0.362995	0.00165468	0.00347696	0	0.000385345	0.110828
ENST00000374434.4	chr1	292	-1	5760	4281	117	1317	MYOM3	TGA	TGAC	11.9788	4.71894	0	7.2599	0.00207966	0.0011023	0	0.00551245	5.00088
ENST00000239144.4	chr17	697	-1	1823	699	229	850	HOXB8	TAG	TAGG	0.72599	0.362995	0	0.362995	0.000398239	0.000519306	0	0.000427053	0.822353
ENST00000262093.10	chr18	176	-1	7677	1239	76	6317	FECH	TGA	TGAC	37.7515	15.9718	0	21.0537	0.00491748	0.0128909	0	0.00333287	0.258545
ENST00000345317.7	chr7	130	-1	3839	1047	155	2592	SKAP2	TGA	TGAG	66.0651	16.3348	1.81498	47.9154	0.0172089	0.0156015	0.0117095	0.0184859	1.18488
ENST00000229758.8	chr6	852	-1	2054	1311	76	622	FBXO5	TGA	TGAT	44.2854	41.3814	0	2.90396	0.0215606	0.0315648	0	0.00466875	0.14791
ENST00000268720.9	chr16	748	1	2657	1869	124	619	CPNE7	TGA	TGAA	0.362995	0.362995	0	0	0.000136618	0.000194219	0	0	0
ENST00000355765.10	chr14	180	1	2868	1977	164	682	PRPF39	TGA	TGAT	10.8899	9.80087	0	1.08899	0.00379702	0.00495744	0	0.00159675	0.322092
ENST00000318596.7	chr19	505	1	3120	924	145	2006	SLC25A42	TAG	TAGG	5.44493	0.362995	0	5.08193	0.00174517	0.000392852	0	0.00253337	6.44865
ENST00000378746.8	chr5	405	-1	6325	2067	213	4000	KIF3A	TAA	TAAA	23.2317	10.1639	0.362995	11.9788	0.00367299	0.00491721	0.0017042	0.00299471	0.609027
ENST00000369983.3	chr10	510	1	6403	5547	254	557	GBF1	TAA	TAAG	30.8546	23.2317	1.08899	5.80792	0.00481877	0.00418815	0.00428734	0.0104271	2.48968
ENST00000568956.1	chr19	1199	1	4005	3147	348	465	ZNF865	TGA	TGAC	3.99295	0.72599	0	2.90396	0.00099699	0.000230693	0	0.00624508	27.071
ENST00000372153.5	chr9	586	-1	3285	2523	146	571	DDX31	TAA	TAAA	7.6229	6.53391	0	1.08899	0.00232052	0.00258974	0	0.00190715	0.736427
ENST00000296424.9	chr4	427	-1	2920	705	66	2104	BDH2	TGA	TGAT	8.71188	4.71894	0.362995	2.54097	0.00298352	0.00669353	0.00549993	0.00120768	0.180426
ENST00000367498.8	chr1	1496	-1	4113	1896	531	1641	IVNS1ABP	TAA	TAAC	68.6061	50.0933	4.35594	13.7938	0.0166803	0.0264205	0.00820328	0.00840574	0.318152
ENST00000215368.4	chr19	43	1	2424	609	290	1480	EFNA2	TAG	TAGT	8.71188	2.17797	0	6.53391	0.00359401	0.00357631	0	0.00441481	1.23446
ENST00000485866.5	chr3	604	-1	2960	2352	556	7	ZNF148	TAA	TAAA	58.0792	51.5453	3.99295	0	0.0196214	0.0219155	0.00718156	0	0
ENST00000450269.5	chr1	570	1	1572	843	333	351	BTBD19	TGA	TGAT	0.72599	0.72599	0	0	0.000461826	0.000861198	0	0	0
ENST00000391860.7	chr1	1760	-1	10914	1542	398	8929	PGBD5	TGA	TGAT	5.44493	1.08899	0	4.35594	0.000498894	0.000706216	0	0.000487842	0.690783
ENST00000280571.9	chr12	892	-1	6141	603	291	5202	RILPL2	TAG	TAGA	7.2599	1.08899	0.362995	5.44493	0.0011822	0.00180595	0.00124741	0.0010467	0.579585
ENST00000265316.9	chr2	995	-1	2980	2496	279	160	ABCB6	TGA	TGAC	3.99295	3.99295	0	0	0.00133991	0.00159974	0	0	0
ENST00000550804.6	chr12	424	-1	5576	2043	67	3421	CALCOCO1	TGA	TGAT	3.62995	2.54097	0	1.08899	0.000650996	0.00124374	0	0.000318324	0.25594
ENST00000539589.5	chr11	350	-1	2009	1242	337	385	PACSIN3	TGA	TGAG	8.71188	5.08193	0	3.62995	0.00433643	0.00409173	0	0.00942844	2.30427
ENST00000406855.7	chr22	88	-1	1063	687	13	318	DERL3	TGA	TGAG	0.72599	0.72599	0	0	0.000682964	0.00105675	0	0	0
ENST00000393240.7	chr12	614	1	3095	1236	665	1149	SYT1	TAA	TAAA	28.6766	14.8828	2.54097	10.8899	0.00926547	0.0120411	0.003821	0.00947768	0.787111
ENST00000472174.7	chr1	555	1	987	585	75	282	ATP6V0B	TAG	TAGA	10.8899	8.34889	0	1.81498	0.0110333	0.0142716	0	0.00643608	0.450971
ENST00000373095.6	chr9	515	-1	4617	1122	846	2604	FAM102A	TGA	TGAG	10.5269	1.45198	0	9.07488	0.00228002	0.0012941	0	0.00348498	2.69297
ENST00000222573.5	chr7	99	1	8974	2277	901	5751	ITGB8	TAA	TAAA	13.4308	0.72599	0	12.7048	0.00149664	0.000318836	0	0.00220915	6.92879
ENST00000216797.9	chr14	154	-1	1558	921	96	496	NFKBIA	TGA	TGAG	21.0537	14.1568	0	5.80792	0.0135133	0.0153711	0	0.0117095	0.761787
ENST00000393437.7	chr2	497	-1	13912	2232	634	11001	LONRF2	TGA	TGAT	1.81498	0	0	1.81498	0.000130461	0	0	0.000164983	0
ENST00000397203.6	chr12	9	1	9118	3234	151	5688	ERC1	TGA	TGAC	257.727	58.8052	0.72599	198.195	0.0282657	0.0181834	0.00480788	0.0348445	1.91628
ENST00000361175.8	chr10	371	1	3949	1812	363	1729	PAPSS2	TAA	TAAG	52.9973	26.4986	1.45198	23.2317	0.0134204	0.014624	0.00399995	0.0134365	0.918799
ENST00000372458.8	chr1	545	-1	1466	807	105	509	ELOVL1	TGA	TGAG	8.71188	6.17092	0	2.54097	0.00594262	0.00764674	0	0.00499207	0.652837
ENST00000371224.7	chr10	427	-1	3352	2355	137	815	ALDH18A1	TGA	TGAA	28.6766	14.8828	0	13.7938	0.00855508	0.00631966	0	0.0169249	2.67814
ENST00000397062.8	chr2	792	-1	2446	1785	145	471	NFE2L2	TAG	TAGA	140.842	136.486	2.17797	2.17797	0.0575806	0.0764628	0.0150205	0.00462414	0.0604757
ENST00000345941.2	chr13	146	-1	2428	1002	1137	244	LPAR6	TGA	TGAA	7.6229	4.35594	2.90396	0.362995	0.00313958	0.00434725	0.00255406	0.00148768	0.342213
ENST00000645955.1	chr13	161	1	1829	837	153	794	RNASEH2B	TGA	TGAG	28.3136	27.9506	0	0	0.0154804	0.0333938	0	0	0
ENST00000360000.8	chrX	446	-1	1131	321	140	625	TCEAL8	TGA	TGAA	35.9365	19.2387	5.80792	9.80087	0.0317741	0.0599338	0.0414852	0.0156814	0.261645
ENST00000374403.4	chrX	328	1	4388	3666	62	615	KIF4A	TGA	TGAA	49.3673	38.8405	0.362995	10.1639	0.0112505	0.0105948	0.00585476	0.0165266	1.55988
ENST00000280871.9	chr12	264	-1	7221	1914	267	4995	SLC2A13	TAA	TAAT	50.4563	4.71894	0	45.0114	0.00698744	0.00246548	0	0.00901129	3.65498
ENST00000377727.1	chr6	125	-1	397	279	4	69	HIST1H4H	TAA	TAAG	18.5128	14.8828	0.362995	0	0.0466316	0.0533434	0.0907488	0	0
ENST00000228928.12	chr12	791	1	6599	3231	51	3272	OAS3	TGA	TGAA	13.4308	1.81498	0	11.6158	0.00203528	0.000561738	0	0.00355007	6.3198
ENST00000534313.6	chr11	621	1	3499	3096	167	191	SIPA1	TGA	TGAG	2.17797	2.17797	0	0	0.000622455	0.000703479	0	0	0
ENST00000354284.8	chr11	995	1	1456	1023	57	331	TMEM25	TAA	TAAC	0.362995	0.362995	0	0	0.00024931	0.000354834	0	0	0
ENST00000590194.5	chr17	632	-1	1542	1023	121	353	SLC25A39	TGA	TGAA	59.5312	23.9577	1.81498	33.0326	0.0386065	0.023419	0.0149998	0.0935766	3.99575
ENST00000335183.11	chr14	223	1	841	606	56	134	CDKN3	TAA	TAAA	43.1964	39.9295	1.08899	0.362995	0.0513632	0.0658902	0.0194462	0.00270892	0.0411126
ENST00000528785.1	chr1	885	1	1271	663	29	534	CYB561D1	TAA	TAAG	0.362995	0.362995	0	0	0.000285598	0.000547504	0	0	0
ENST00000338791.11	chr7	620	-1	2611	1767	75	724	IMPDH1	TGA	TGAG	49.3673	35.9365	0	13.4308	0.0189074	0.0203376	0	0.0185509	0.912146
ENST00000380117.5	chr9	89	-1	2370	1047	538	740	ELAVL2	TAA	TAAT	3.26696	2.54097	0.362995	0.362995	0.00137846	0.0024269	0.000674712	0.000490534	0.202124
ENST00000645929.1	chr14	48	-1	7422	6876	95	406	CHD8	TGA	TGAA	65.3391	58.8052	0	6.53391	0.00880344	0.00855224	0	0.0160934	1.88177
ENST00000283684.9	chr18	178	-1	6144	3723	320	2056	ATP8B1	TGA	TGAT	8.34889	5.80792	0	2.54097	0.00135887	0.00156001	0	0.00123588	0.792224
ENST00000359238.6	chr17	690	1	2315	780	261	1229	SNX11	TGA	TGAG	3.99295	1.45198	0	2.54097	0.00172481	0.00186151	0	0.00206751	1.11066
ENST00000611250.4	chrX	170	1	4713	2439	70	2159	JADE3	TGA	TGAT	58.0792	27.5876	0	29.4026	0.0123232	0.011311	0	0.0136186	1.20401
ENST00000510878.1	chr1	139	1	849	435	28	341	AGTRAP	TAA	TAAG	3.62995	1.81498	0	1.45198	0.00427556	0.00417236	0	0.00425801	1.02053
ENST00000295767.9	chr3	67	-1	1603	435	319	804	CHCHD4	TAA	TAAT	25.7727	12.3418	1.08899	11.9788	0.0160778	0.028372	0.00341375	0.0148991	0.525132
ENST00000573759.1	chr17	104	1	2204	585	323	1251	MIS12	TAA	TAAT	17.0608	4.71894	0.72599	11.2528	0.00774082	0.00806656	0.00224765	0.00899508	1.11511
ENST00000322203.7	chr6	333	1	718	621	28	24	RPL10A	TAA	TAAG	203.64	180.772	13.0678	0	0.283622	0.291098	0.466708	0	0
ENST00000639811.1	chr12	100	1	2175	732	3	1395	NECAP1	TAA	TAAA	31.2176	10.1639	0	19.9647	0.0143529	0.0138851	0	0.0143116	1.03072
ENST00000248104.11	chr16	53	-1	4320	657	589	3029	UNKL	TGA	TGAC	6.89691	0	0.362995	6.53391	0.00159651	0	0.000616291	0.00215712	0
ENST00000355451.8	chr7	211	-1	8036	1053	52	6886	NUDCD3	TAA	TAAT	49.7303	7.2599	0	42.4704	0.00618844	0.00689449	0	0.00616765	0.894576
ENST00000255882.10	chr22	46	-1	6752	6276	81	350	PI4KA	TGA	TGAG	9.07488	7.98589	0	1.08899	0.00134403	0.00127245	0	0.00311139	2.44519
ENST00000613397.4	chr11	882	1	4066	1824	1723	474	BIRC2	TAA	TAAA	99.4607	66.7911	22.1427	7.98589	0.0244615	0.0366179	0.0128512	0.0168479	0.460099
ENST00000274140.10	chr5	41	1	9641	2700	198	6698	2020-03-06	TAA	TAAA	193.113	63.8871	0.362995	127.774	0.0200304	0.0236619	0.00183331	0.0190765	0.806211
ENST00000573584.6	chr17	99	-1	3611	2193	6	1367	NUP88	TGA	TGAC	17.4238	16.6978	0	0.72599	0.00482519	0.00761412	0	0.000531083	0.0697497
ENST00000271526.9	chr1	1249	1	2068	1443	231	349	PRCC	TAG	TAGG	27.5876	18.1498	0.362995	7.6229	0.0133402	0.0125778	0.00157141	0.0218421	1.73656
ENST00000328194.8	chr11	180	-1	4991	3831	275	840	DENND5A	TGA	TGAC	161.533	137.938	0	22.1427	0.0323648	0.0360058	0	0.0263604	0.732115
ENST00000356865.10	chr15	17	-1	6680	4467	106	2062	ATP10A	TGA	TGAA	0.362995	0.362995	0	0	5.43406e-05	8.12615e-05	0	0	0
ENST00000291481.8	chr19	510	-1	4342	1176	66	3055	HAPLN4	TAG	TAGG	0.72599	0	0	0.72599	0.000167202	0	0	0.00023764	0
ENST00000332624.8	chr2	886	-1	6389	2712	302	3330	TRAK2	TGA	TGAG	129.226	72.236	3.99295	51.5453	0.0202264	0.0266357	0.0132217	0.0154791	0.58114
ENST00000584773.5	chr17	773	-1	1317	729	118	425	SRSF1	TAA	TAAG	170.245	88.9338	14.8828	60.9832	0.129267	0.121994	0.126125	0.14349	1.1762
ENST00000344517.5	chr1	1756	-1	3869	2184	49	1591	ABCB10	TAA	TAAG	8.34889	5.80792	0	2.54097	0.00215789	0.0026593	0	0.00159709	0.600566
ENST00000301919.9	chr11	903	-1	4103	1005	1423	1630	MSANTD4	TGA	TGAT	46.1004	19.9647	6.17092	19.9647	0.0112358	0.0198654	0.00433655	0.0122483	0.616564
ENST00000613052.1	chr9	529	1	1429	435	939	10	CERCAM	TAA	TAAA	2.17797	1.08899	1.08899	0	0.00152412	0.00250341	0.00115973	0	0
ENST00000431561.7	chr16	131	-1	3348	1155	607	1541	ZNF200	TAA	TAAT	7.98589	4.35594	0	3.26696	0.00238527	0.00377138	0	0.00212002	0.562135
ENST00000344320.7	chr15	87	1	2370	495	410	1420	C15orf62	TAA	TAAA	1.81498	0	0.362995	1.45198	0.000765812	0	0.000885354	0.00102252	0
ENST00000367030.7	chr1	1641	-1	3931	3486	112	288	LAMB3	TGA	TGAT	2.17797	2.17797	0	0	0.00055405	0.000624776	0	0	0
ENST00000263773.9	chr11	366	-1	3972	3021	7	899	FNBP4	TAG	TAGT	24.3207	16.6978	0	7.2599	0.00612303	0.00552723	0	0.00807553	1.46104
ENST00000263805.8	chr15	117	-1	10460	5619	321	4475	ZNF106	TGA	TGAA	346.66	155.362	0	190.572	0.0331415	0.0276494	0	0.042586	1.54022
ENST00000291536.8	chr21	152	-1	1300	897	32	326	RSPH1	TAA	TAAG	0.72599	0.72599	0	0	0.000558454	0.000809354	0	0	0
ENST00000265417.7	chr6	472	-1	5668	4008	228	1387	ADGRF5	TAA	TAAG	0.362995	0	0	0.362995	6.40429e-05	0	0	0.000261712	0
ENST00000256509.7	chr3	0	1	7856	3642	469	3700	CHL1	TAA	TAAA	0.362995	0	0	0.362995	4.62061e-05	0	0	9.81068e-05	0
ENST00000373116.6	chr1	467	-1	953	741	103	64	MRPS15	TAA	TAAA	15.6088	13.7938	0.362995	0.72599	0.0163786	0.0186151	0.00352422	0.0113436	0.609375
ENST00000373218.5	chr10	273	1	7491	330	251	6865	EIF4EBP2	TGA	TGAC	1527.48	106.358	3.26696	1411.33	0.203909	0.322296	0.0130158	0.205583	0.63787
ENST00000643188.1	chr20	208	-1	1940	1392	160	343	GSS	TGA	TGAG	13.0678	8.71188	0	4.35594	0.00673599	0.00625854	0	0.0126995	2.02915
ENST00000378378.9	chr1	65	1	2822	2097	160	520	ARHGEF16	TAG	TAGC	0.362995	0.362995	0	0	0.00012863	0.000173102	0	0	0
ENST00000372745.1	chr10	318	-1	2320	1224	211	840	AP3M1	TGA	TGAG	49.3673	22.1427	4.35594	22.8687	0.021279	0.0180904	0.0206443	0.0272246	1.50492
ENST00000370693.5	chr6	523	1	6651	603	366	5637	BAG2	TAG	TAGT	64.6131	21.0537	1.08899	41.7444	0.0097148	0.034915	0.00297537	0.00740544	0.212099
ENST00000395074.6	chr11	438	-1	1833	1128	83	577	LPXN	TAA	TAAT	25.0467	16.3348	1.45198	7.2599	0.0136643	0.0144812	0.0174937	0.0125822	0.868862
ENST00000554998.5	chr14	495	1	1952	1602	81	224	WDR25	TGA	TGAG	2.90396	2.54097	0.362995	0	0.00148768	0.00158612	0.00448142	0	0
ENST00000322213.8	chrX	264	-1	9784	3669	122	5948	SMC1A	TAG	TAGC	104.906	44.6484	0	59.5312	0.0107222	0.0121691	0	0.0100086	0.822461
ENST00000414097.6	chr8	519	-1	3755	1152	862	1696	NDRG1	TAG	TAGG	16.3348	2.54097	0	13.4308	0.00435014	0.0022057	0	0.00791912	3.5903
ENST00000396556.6	chr3	122	-1	6600	2262	117	4176	OSBPL10	TGA	TGAT	119.062	54.0863	0	62.7982	0.0180398	0.0239108	0	0.0150379	0.628915
ENST00000484866.5	chr3	842	1	1730	1425	76	184	ZNF639	TGA	TGAT	35.2105	34.1215	0.362995	0.362995	0.0203529	0.0239449	0.00477625	0.0019728	0.082389
ENST00000295777.9	chr3	810	1	1907	1200	425	237	SERPINI1	TAA	TAAG	1.81498	1.81498	0	0	0.000951744	0.00151248	0	0	0
ENST00000483273.2	chr1	194	-1	2180	243	1693	199	UQCRHL	TAA	TAAA	0.72599	0	0.72599	0	0.000333023	0	0.000428819	0	0
ENST00000379719.8	chr11	182	1	6162	3084	106	2927	IPO7	TGA	TGAG	700.218	447.936	5.08193	235.221	0.113635	0.145245	0.0479428	0.0803624	0.553288
ENST00000394249.8	chr15	489	-1	3072	1830	112	1085	PRC1	TGA	TGAG	121.603	74.051	1.81498	44.6484	0.0395844	0.040465	0.0162051	0.0411506	1.01694
ENST00000247194.9	chr14	255	-1	1516	1032	86	353	L3HYPDH	TGA	TGAC	1.81498	1.81498	0	0	0.00119721	0.0017587	0	0	0
ENST00000256442.10	chr5	193	1	2029	1269	107	608	CCNB1	TAA	TAAC	39.5665	34.8475	2.17797	2.54097	0.0195005	0.0274606	0.0203549	0.00417922	0.15219
ENST00000586682.1	chr19	425	1	1315	591	-1	680	RAB8A	TGA	TGAG	78.4069	28.3136	78.4069	47.9154	0.0596251	0.047908	-78.4069	0.0704638	1.47081
ENST00000423759.5	chrX	342	1	7722	5655	70	1952	TAF1	TGA	TGAG	58.0792	38.8405	0	19.2387	0.00752127	0.00686834	0	0.00985591	1.43498
ENST00000388948.8	chr15	513	1	15674	6015	211	9403	LRRK1	TAA	TAAT	18.8757	5.08193	0.362995	13.0678	0.00120427	0.000844876	0.00172036	0.00138975	1.64492
ENST00000419938.5	chr2	668	-1	1755	630	227	853	ZEB2	TGA	TGAA	5.80792	1.45198	0.72599	3.26696	0.00330936	0.00230473	0.00319819	0.00382996	1.66178
ENST00000308666.4	chr12	262	-1	6290	2190	182	3873	ABCD2	TAA	TAAT	0.72599	0.362995	0	0.362995	0.00011542	0.000165751	0	9.37245e-05	0.565453
ENST00000617178.4	chr22	312	-1	2006	657	48	1256	POLDIP3	TAA	TAAC	25.0467	7.2599	0	17.7868	0.0124859	0.0110501	0	0.0141614	1.28157
ENST00000369878.9	chr10	526	1	15857	2595	181	13036	CNNM2	TAG	TAGG	14.1568	1.45198	0.362995	12.3418	0.00089278	0.00055953	0.0020055	0.00094675	1.69205
ENST00000356511.6	chr1	497	1	1079	858	10	166	PPIE	TAG	TAGA	3.26696	3.26696	0	0	0.00302776	0.00380764	0	0	0
ENST00000400198.8	chr13	257	-1	3363	789	212	2317	ARGLU1	TAA	TAAA	28.6766	21.4167	0.362995	6.89691	0.00852709	0.0271441	0.00171224	0.00297665	0.109661
ENST00000329600.7	chr15	477	1	1193	1125	15	8	GDPGP1	TAA	TAAT	0.362995	0.362995	0	0	0.000304271	0.000322662	0	0	0
ENST00000262370.12	chr16	160	1	3930	1698	129	2058	MGRN1	TGA	TGAG	13.4308	7.98589	0.362995	5.08193	0.00341751	0.00470312	0.00281392	0.00246935	0.525046
ENST00000392369.6	chr12	919	1	1530	618	518	349	RAN	TGA	TGAG	360.454	268.616	18.1498	52.2713	0.235591	0.434654	0.0350381	0.149774	0.344583
ENST00000380050.8	chr7	376	1	5171	1377	301	3448	CDK14	TGA	TGAC	104.18	42.4704	1.45198	59.5312	0.0201469	0.0308427	0.00482386	0.0172654	0.559789
ENST00000439945.5	chr2	977	1	1483	1227	199	12	BCS1L	TGA	TGAT	5.80792	5.08193	0.362995	0	0.00391633	0.00414175	0.0018241	0	0
ENST00000366933.5	chr1	1681	1	5798	1053	29	4671	SPATA17	TAA	TAAA	1.81498	1.81498	0	0	0.000313035	0.00172362	0	0	0
ENST00000424576.6	chr12	787	-1	1074	834	180	15	RPL6	TAA	TAAA	752.126	721.634	12.7048	0	0.700303	0.865269	0.0705824	0	0
ENST00000584027.8	chr1	1031	-1	5034	3303	69	1617	NBPF9	TAA	TAAG	30.1286	21.4167	0	8.71188	0.00598502	0.00648402	0	0.00538768	0.830917
ENST00000380680.4	chr13	60	-1	4384	321	1140	2878	UBL3	TAA	TAAA	46.1004	8.34889	10.1639	25.0467	0.0105156	0.026009	0.00891567	0.0087028	0.334607
ENST00000287497.13	chr16	411	1	3656	3426	69	116	ITGAM	TAG	TAGC	0.72599	0.72599	0	0	0.000198575	0.000211906	0	0	0
ENST00000381844.8	chr2	29	-1	2216	705	158	1308	YWHAQ	TAA	TAAA	681.342	264.986	3.99295	405.103	0.307465	0.375867	0.0252718	0.309711	0.823991
ENST00000301717.8	chr16	67	-1	1449	1035	27	342	SPSB3	TGA	TGAC	0.362995	0	0	0	0.000250514	0	0	0	0
ENST00000377113.6	chr10	88	-1	3799	378	440	2936	CASC10	TGA	TGAA	5.44493	0	0	5.44493	0.00143325	0	0	0.00185454	0
ENST00000219204.8	chr16	495	1	1969	459	103	1362	ARL2BP	TAG	TAGG	47.5524	14.8828	0.362995	30.1286	0.0241505	0.0324244	0.00352422	0.0221208	0.682228
ENST00000404914.8	chr2	1144	1	2797	1149	16	1587	ATG4B	TGA	TGAA	19.6017	10.8899	0	8.34889	0.00700813	0.00947768	0	0.0052608	0.555072
ENST00000332496.10	chr15	475	1	3781	2481	234	1021	SEMA4B	TGA	TGAG	2.90396	0.72599	0.72599	1.45198	0.00076804	0.00029262	0.00310252	0.00142212	4.85994
ENST00000314425.9	chrX	339	-1	5536	4080	125	1286	ZMYM3	TGA	TGAG	13.4308	6.89691	0	6.53391	0.00242609	0.00169042	0	0.0050808	3.00565
ENST00000418331.7	chr11	368	1	7845	3981	348	3471	PTPRJ	TAA	TAAT	172.06	71.873	0	99.8237	0.0219324	0.018054	0	0.0287593	1.59296
ENST00000244050.3	chr20	359	1	1705	762	74	824	SNAI1	TGA	TGAC	0.72599	0.72599	0	0	0.000425801	0.000952743	0	0	0
ENST00000614691.1	chr12	458	1	1368	798	71	454	METTL7B	TAG	TAGC	2.17797	0.72599	0	1.45198	0.00159208	0.000909762	0	0.00319819	3.51542
ENST00000506784.5	chr1	1601	1	2143	1482	214	402	CDK18	TGA	TGAG	1.81498	0.72599	0	0.72599	0.000846932	0.000489872	0	0.00180595	3.68657
ENST00000355673.8	chr12	522	1	4202	2979	270	908	MBD6	TAG	TAGC	5.80792	3.26696	0	2.54097	0.00138218	0.00109666	0	0.00279842	2.55176
ENST00000358365.7	chr17	366	1	3297	2043	221	988	RHOT1	TGA	TGAT	29.4026	20.3277	1.08899	7.98589	0.00891799	0.00994994	0.00492754	0.00808289	0.812355
ENST00000302472.4	chr5	108	1	3431	1434	601	1351	PTGER4	TAA	TAAT	1.45198	1.45198	0	0	0.000423195	0.00101254	0	0	0
ENST00000309083.7	chr12	63	1	1181	276	365	495	PTMS	TGA	TGAG	105.269	38.4775	2.54097	62.4352	0.0891351	0.139411	0.00696155	0.126132	0.904746
ENST00000055077.8	chr7	310	-1	1685	1032	10	598	RFC2	TAG	TAGA	21.7797	15.9718	0	5.08193	0.0129256	0.0154765	0	0.00849821	0.549103
ENST00000370784.8	chrX	605	1	1368	555	400	368	FAM122C	TAA	TAAA	0.362995	0	0.362995	0	0.000265347	0	0.000907488	0	0
ENST00000427939.2	chr7	474	1	2087	1824	6	212	FBXO24	TAA	TAAT	0.362995	0.362995	0	0	0.000173932	0.00019901	0	0	0
ENST00000246914.10	chr17	591	1	4199	3699	83	372	WNK4	TGA	TGAA	0.72599	0.72599	0	0	0.000172896	0.000196267	0	0	0
ENST00000373001.4	chr1	488	-1	2681	1167	120	1349	RRAGC	TAG	TAGT	26.1356	4.35594	0	21.4167	0.00974847	0.0037326	0	0.015876	4.25334
ENST00000369489.10	chr1	962	-1	1086	720	48	273	CD58	TGA	TGAT	4.35594	3.62995	0	0	0.004011	0.0050416	0	0	0
ENST00000354725.8	chr7	615	1	3448	2700	174	529	SND1	TAA	TAAG	52.9973	41.3814	0.362995	10.5269	0.0153704	0.0153265	0.00208618	0.0198995	1.29838
ENST00000301399.11	chr19	1087	-1	3074	1425	360	1244	ZNF577	TAA	TAAA	2.17797	0.72599	1.45198	0	0.000708514	0.000509467	0.00403328	0	0
ENST00000508192.5	chr11	559	1	2924	2142	496	241	MARK2	TAA	TAAC	12.3418	11.6158	0.72599	0	0.00422087	0.0054229	0.00146369	0	0
ENST00000260118.7	chr8	282	-1	1248	924	32	247	GGH	TGA	TGAA	14.1568	14.1568	0	0	0.0113436	0.0153212	0	0	0
ENST00000651870.1	chr18	20	-1	3372	1317	180	1830	ZBTB14	TAG	TAGA	22.1427	10.8899	0.72599	10.5269	0.00656664	0.00826868	0.00403328	0.00575238	0.695683
ENST00000265433.7	chr8	373	-1	4666	2232	149	2240	NBN	TAA	TAAC	212.715	96.9197	1.45198	113.254	0.0455883	0.0434228	0.00974484	0.05056	1.16437
ENST00000399926.5	chr21	39	1	749	396	192	116	MAP3K7CL	TAA	TAAC	1.81498	0.72599	0	0.72599	0.0024232	0.00183331	0	0.00625854	3.41379
ENST00000287706.8	chr16	220	-1	1210	900	97	168	NTAN1	TAA	TAAA	74.414	71.51	0	1.45198	0.0614992	0.0794556	0	0.00864274	0.108774
ENST00000397117.5	chr3	44	-1	1603	822	586	150	SEC13	TAA	TAAC	29.4026	23.9577	2.54097	0.72599	0.0183422	0.0291456	0.00433612	0.00483993	0.166061
ENST00000561421.5	chr15	413	1	1549	1227	152	125	FAH	TGA	TGAG	4.35594	4.35594	0	0	0.0028121	0.00355007	0	0	0
ENST00000159087.7	chr19	453	-1	4178	3666	179	288	ANO8	TAG	TAGC	1.45198	1.08899	0	0.362995	0.00034753	0.00029705	0	0.0012604	4.24306
ENST00000376292.8	chr11	779	-1	1500	1059	216	180	KLHL35	TGA	TGAT	0.72599	0.72599	0	0	0.000483993	0.000685543	0	0	0
ENST00000329654.8	chr1	710	1	3998	2178	181	1594	PDE4B	TAA	TAAT	3.99295	1.81498	0	2.17797	0.000998736	0.000833322	0	0.00136636	1.63965
ENST00000436949.5	chr7	354	-1	2550	2283	158	64	SEMA3A	TGA	TGAG	190.572	174.238	5.44493	7.2599	0.0747343	0.0763196	0.0344616	0.113436	1.48633
ENST00000380752.10	chr13	59	-1	7343	1857	381	5060	SLC7A1	TGA	TGAC	325.97	46.4634	1.81498	275.513	0.0443919	0.0250207	0.00476372	0.0544493	2.17617
ENST00000267202.7	chr12	882	-1	2706	825	56	1780	VPS37B	TGA	TGAG	29.0396	3.26696	0	25.7727	0.0107316	0.00395995	0	0.014479	3.65637
ENST00000511809.5	chr4	156	-1	830	132	184	469	SMIM14	TGA	TGAT	0.72599	0.362995	0.362995	0	0.000874687	0.00274996	0.0019728	0	0
ENST00000411851.3	chr19	109	-1	1494	1191	208	50	TBXA2R	TGA	TGAA	2.17797	2.17797	0	0	0.00145781	0.00182869	0	0	0
ENST00000341142.7	chr2	1009	1	1524	1230	66	183	GMPPA	TGA	TGAG	6.17092	5.08193	0.362995	0.72599	0.00404916	0.00413165	0.00549993	0.00396716	0.960187
ENST00000262288.7	chr17	766	1	1942	1326	49	522	SCPEP1	TAG	TAGG	3.99295	2.54097	0	1.45198	0.0020561	0.00191626	0	0.00278157	1.45156
ENST00000369893.10	chr10	521	1	6770	936	65	5724	SFXN2	TAA	TAAA	5.80792	1.81498	0	3.62995	0.000857891	0.00193908	0	0.000634163	0.327044
ENST00000261733.7	chr12	780	1	9561	1521	44	7951	ALDH2	TAA	TAAG	2.54097	1.45198	0	1.08899	0.000265764	0.000954622	0	0.000136962	0.143473
ENST00000505036.5	chr4	524	-1	809	198	397	169	NDUFC1	TAA	TAAA	9.07488	7.98589	0.362995	0	0.0112174	0.0403328	0.000914345	0	0
ENST00000535286.5	chr13	183	1	2579	2202	66	266	TDRD3	TAA	TAAT	5.44493	5.44493	0	0	0.00211126	0.00247272	0	0	0
ENST00000569748.5	chr16	633	-1	4554	2436	904	1169	AP1G1	TGA	TGAG	68.6061	23.9577	2.17797	42.1074	0.015065	0.00983484	0.00240926	0.03602	3.66249
ENST00000305536.11	chrX	586	1	1823	936	40	802	RBMX2	TGA	TGAA	13.0678	7.98589	0.72599	2.90396	0.00716831	0.00853194	0.0181498	0.0036209	0.424394
ENST00000219299.8	chr16	518	1	5272	1101	73	4053	CCDC113	TAG	TAGC	0.72599	0.362995	0	0.362995	0.000137707	0.000329696	0	8.95621e-05	0.271651
ENST00000310624.6	chr22	137	1	3783	3030	27	681	NEFH	TAA	TAAG	0.362995	0.362995	0	0	9.59543e-05	0.0001198	0	0	0
ENST00000280800.5	chr12	800	1	4787	1737	8	2997	PLBD2	TGA	TGAA	8.71188	3.99295	0	4.35594	0.0018199	0.00229876	0	0.00145343	0.632269
ENST00000434634.6	chr15	444	-1	5387	1104	55	4183	WDR73	TGA	TGAC	21.4167	5.80792	0	15.2458	0.00397563	0.0052608	0	0.0036447	0.692804
ENST00000371847.8	chr1	618	-1	5003	1434	190	3334	SPATA6	TGA	TGAG	19.9647	9.43787	0	10.5269	0.00399055	0.0065815	0	0.00315743	0.479743
ENST00000396168.1	chr11	242	-1	2796	1593	162	996	PTPN5	TGA	TGAC	0.362995	0	0	0.362995	0.000129827	0	0	0.000364453	0
ENST00000216452.9	chr14	303	-1	1394	534	59	756	PIGH	TGA	TGAG	10.1639	5.44493	0	4.71894	0.00729115	0.0101965	0	0.00624198	0.612169
ENST00000374296.3	chr1	314	-1	3297	1008	661	1583	PAQR7	TGA	TGAA	0.362995	0.362995	0	0	0.000110099	0.000360114	0	0	0
ENST00000394767.3	chr4	430	-1	5569	1071	445	4008	CXXC4	TAA	TAAA	14.1568	3.62995	0	10.5269	0.00254207	0.00338931	0	0.00262646	0.774925
ENST00000440460.6	chr11	937	1	5897	2019	291	3542	DIXDC1	TAA	TAAT	20.6907	7.6229	0.362995	12.7048	0.00350869	0.00377558	0.00124741	0.00358691	0.950028
ENST00000600449.8	chrX	672	-1	2720	1020	206	1449	TMEM185A	TAG	TAGA	0.72599	0.362995	0	0.362995	0.000266908	0.000355878	0	0.000250514	0.703934
ENST00000409465.5	chr2	844	-1	3097	2220	426	406	STAT1	TAG	TAGA	38.4775	30.1286	1.08899	6.89691	0.0124241	0.0135714	0.0025563	0.0169875	1.25171
ENST00000304191.4	chr15	433	1	1565	324	212	984	RAMAC	TGA	TGAT	18.8757	7.98589	8.34889	2.17797	0.0120612	0.0246478	0.0393815	0.00221338	0.0898004
ENST00000426726.8	chr17	631	1	2005	1308	226	426	RUNDC3A	TGA	TGAG	5.44493	3.99295	0	0.362995	0.00271567	0.00305271	0	0.000852101	0.279129
ENST00000319286.6	chr8	499	1	3278	1557	151	1525	ZNF572	TGA	TGAG	5.44493	2.54097	0.362995	2.54097	0.00166105	0.00163196	0.00240394	0.00166621	1.02098
ENST00000359901.8	chr2	475	-1	4297	4029	30	193	ANKRD36B	TAG	TAGA	5.08193	3.99295	1.08899	0	0.00118267	0.000991051	0.0362995	0	0
ENST00000636934.1	chr8	5	1	1790	618	203	924	CLN8	TAG	TAGG	4.71894	1.81498	2.17797	0.72599	0.00263628	0.00293685	0.0107289	0.000785704	0.267532
ENST00000374259.7	chrX	334	1	3301	1485	326	1445	FOXO4	TGA	TGAG	4.71894	3.26696	0.362995	1.08899	0.00142955	0.00219997	0.00111348	0.000753623	0.342561
ENST00000619396.4	chr19	178	-1	2226	2103	68	10	KHSRP	TGA	TGAA	66.4281	66.4281	0	0	0.0298419	0.0315873	0	0	0
ENST00000581312.6	chr1	1047	-1	8922	2499	339	6039	OTUD7B	TGA	TGAA	42.1074	9.43787	0.362995	32.3066	0.00471951	0.00377666	0.00107078	0.00534965	1.4165
ENST00000376266.9	chr6	215	-1	2625	2316	117	147	CCHCR1	TAA	TAAG	3.26696	2.90396	0	0.362995	0.00124455	0.00125387	0	0.00246935	1.96939
ENST00000438704.6	chr4	641	-1	1032	597	17	373	HMGB2	TAA	TAAA	280.595	263.897	3.99295	7.2599	0.271895	0.442039	0.234879	0.0194635	0.0440313
ENST00000426621.6	chr22	243	1	2216	462	90	1619	MAFF	TAG	TAGT	4.35594	0	0	4.35594	0.00196568	0	0	0.00269051	0
ENST00000373664.7	chr20	239	-1	5684	3174	61	2404	RBL1	TAA	TAAT	41.3814	21.0537	0	20.3277	0.00728034	0.00663318	0	0.00845579	1.27477
ENST00000449193.6	chr10	89	-1	6598	2694	2247	1612	SKIDA1	TAA	TAAA	1.81498	0.72599	0	1.08899	0.00027508	0.000269484	0	0.000675549	2.50682
ENST00000308736.7	chr12	908	-1	4559	3441	103	970	DHX37	TGA	TGAC	5.08193	5.08193	0	0	0.0011147	0.00147688	0	0	0
ENST00000295666.6	chr4	233	-1	1427	816	28	538	IGFBP7	TAA	TAAA	9.43787	7.6229	0	0.72599	0.00661379	0.00934179	0	0.00134942	0.14445
ENST00000442039.3	chr16	54	-1	917	366	18	488	C16orf91	TGA	TGAC	8.34889	3.62995	0	4.71894	0.00910457	0.0099179	0	0.00966995	0.975
ENST00000258729.8	chr7	114	-1	4274	1707	375	2147	IGF2BP3	TAA	TAAA	683.883	290.033	5.80792	372.796	0.16001	0.169908	0.0154878	0.173636	1.02194
ENST00000299927.4	chr15	447	1	7863	3771	16	4031	ZNF592	TGA	TGAC	78.044	42.4704	0	34.8475	0.00992547	0.0112624	0	0.00864488	0.76759
ENST00000261405.9	chr12	41	-1	8838	8409	249	135	VWF	TGA	TGAG	0.362995	0.362995	0	0	4.10721e-05	4.31675e-05	0	0	0
ENST00000277632.8	chr10	70	-1	2364	1305	202	812	MINDY3	TAA	TAAT	16.6978	12.7048	0.72599	3.26696	0.00706336	0.0097355	0.00359401	0.00402334	0.413265
ENST00000408995.5	chr2	523	-1	1367	807	99	416	FHL2	TGA	TGAA	17.7868	12.7048	0	4.71894	0.0130115	0.0157433	0	0.0113436	0.720536
ENST00000358438.6	chr7	519	-1	2065	444	22	1554	POLR2J2	TGA	TGAG	0.362995	0	0	0.362995	0.000175785	0	0	0.000233588	0
ENST00000361198.9	chr10	505	-1	2285	1095	618	527	LDB1	TAA	TAAA	21.7797	10.5269	1.08899	9.43787	0.0095316	0.00961357	0.00176211	0.0179087	1.86285
ENST00000262982.3	chr20	349	1	3550	2883	117	505	CSE1L	TAA	TAAA	96.9197	88.2078	2.54097	4.71894	0.0273013	0.0305958	0.0217177	0.00934443	0.305415
ENST00000339077.10	chr7	110	1	5619	1728	236	3610	KLHL7	TGA	TGAA	15.9718	12.7048	1.08899	1.08899	0.00284246	0.00735233	0.00461434	0.000301658	0.0410289
ENST00000302274.7	chr4	457	-1	3090	765	335	1945	ELOVL6	TAG	TAGT	239.577	45.7374	6.89691	181.861	0.0775329	0.0597874	0.0205878	0.0935016	1.5639
ENST00000358430.8	chr6	798	-1	4612	2022	86	2459	TXLNB	TAA	TAAG	1.08899	0.72599	0	0.362995	0.00023612	0.000359046	0	0.000147619	0.411143
ENST00000424469.2	chr15	492	1	2705	2046	47	567	SLCO3A1	TGA	TGAG	1.81498	1.81498	0	0	0.000670971	0.000887085	0	0	0
ENST00000368468.4	chr6	717	-1	5018	1929	436	2608	MAN1A1	TAA	TAAA	22.1427	4.71894	0	17.4238	0.00441265	0.00244631	0	0.00668089	2.73101
ENST00000225698.8	chr17	101	-1	1169	816	76	232	C1QBP	TAG	TAGA	67.1541	56.6272	0	5.44493	0.0574458	0.0693961	0	0.0234695	0.338196
ENST00000210060.12	chr19	338	-1	1345	1077	108	115	DHPS	TGA	TGAG	6.17092	6.17092	0	0	0.00458804	0.00572973	0	0	0
ENST00000290649.10	chr16	472	-1	3607	1899	212	1451	AMFR	TAG	TAGC	99.4607	55.5383	0	42.8334	0.0275743	0.0292461	0	0.0295199	1.00936
ENST00000376087.4	chr10	112	-1	6591	5100	160	1286	ANKRD26	TGA	TGAA	25.0467	22.1427	0.362995	2.54097	0.00380013	0.00434171	0.00226872	0.00197587	0.45509
ENST00000310571.7	chr11	758	1	4994	1146	47	3756	PAAF1	TGA	TGAC	13.0678	6.53391	0	6.53391	0.0026167	0.00570149	0	0.00173959	0.305112
ENST00000230050.4	chr6	765	1	503	366	76	16	RPS12	TGA	TGAA	424.704	298.382	95.1047	0	0.844343	0.815251	1.25138	0	0
ENST00000361684.8	chr22	244	-1	3593	1191	218	2139	TMEM184B	TAG	TAGG	45.3744	16.6978	0	28.6766	0.0126286	0.01402	0	0.0134066	0.956247
ENST00000359827.7	chr7	654	-1	13786	5652	957	7132	PLXNA4	TGA	TGAG	2.54097	0.72599	0	1.81498	0.000184315	0.000128448	0	0.000254483	1.98121
ENST00000618612.4	chr20	22	-1	1518	261	168	1044	FKBP1A	TGA	TGAA	127.048	39.5665	0.362995	76.955	0.0836945	0.151596	0.00216069	0.0737117	0.486239
ENST00000398814.8	chr15	347	1	2750	2235	388	82	CCDC33	TGA	TGAG	0.362995	0.362995	0	0	0.000131998	0.000162414	0	0	0
ENST00000383794.7	chr3	73	1	2940	1371	69	1455	CCDC174	TGA	TGAT	7.6229	3.62995	0.362995	2.90396	0.00259282	0.00264767	0.0052608	0.00199585	0.753814
ENST00000215659.13	chr22	364	-1	1778	1071	168	494	MAPK12	TGA	TGAA	7.2599	4.35594	0	1.81498	0.00408318	0.00406717	0	0.00367404	0.90334
ENST00000219334.10	chr16	595	-1	5271	1935	418	2873	SMPD3	TAG	TAGA	0.362995	0	0	0.362995	6.88665e-05	0	0	0.000126347	0
ENST00000559107.5	chr15	518	-1	1353	597	17	694	TM2D3	TGA	TGAC	4.35594	2.54097	0	1.45198	0.00321947	0.00425622	0	0.00209219	0.49156
ENST00000436587.6	chr7	62	1	6235	1059	217	4914	C1GALT1	TGA	TGAA	46.1004	19.9647	1.45198	23.5947	0.00739381	0.0188524	0.00669115	0.00480152	0.25469
ENST00000602748.5	chr7	754	1	3054	2298	274	437	CUL1	TAA	TAAC	49.3673	36.6625	3.62995	5.08193	0.0161648	0.0159541	0.013248	0.0116291	0.728912
ENST00000374007.5	chr10	207	1	3715	450	778	2442	ASAH2B	TAG	TAGT	15.2458	0	1.08899	13.4308	0.00410385	0	0.00139972	0.00549993	0
ENST00000523037.6	chr5	613	1	3173	588	32	2508	MRPL22	TGA	TGAT	10.1639	9.07488	0.362995	0	0.00320323	0.0154335	0.0113436	0	0
ENST00000349830.8	chr8	6	1	5648	4002	229	1372	ARHGEF10	TAA	TAAG	18.1498	15.2458	0	2.90396	0.00321348	0.00380954	0	0.00211659	0.555602
ENST00000262803.9	chr19	499	1	5348	3324	266	1713	UPF1	TAA	TAAA	21.4167	3.99295	0	17.0608	0.00400462	0.00120125	0	0.00995959	8.29104
ENST00000354190.10	chr11	754	1	1977	699	22	1211	PLEKHB1	TGA	TGAG	3.26696	0	0	3.26696	0.00165248	0	0	0.00269773	0
ENST00000441493.7	chr22	12	-1	9447	5976	349	3077	MICAL3	TGA	TGAG	19.6017	6.17092	0	13.0678	0.00207492	0.00103262	0	0.00424694	4.11279
ENST00000262101.10	chr8	69	-1	3618	1323	52	2198	MSR1	TAA	TAAT	0.362995	0.362995	0	0	0.00010033	0.000274373	0	0	0
ENST00000263346.13	chr16	758	1	2248	1998	70	135	TCF25	TGA	TGAG	17.4238	16.6978	0.362995	0	0.00775079	0.00835724	0.00518564	0	0
ENST00000649800.1	chr1	600	-1	2809	1365	238	1161	MKNK1	TGA	TGAA	5.44493	1.45198	0.72599	2.90396	0.00193839	0.00106372	0.00305038	0.00250126	2.35142
ENST00000370475.8	chrX	665	1	4308	1866	122	2275	FMR1	TAA	TAAA	53.7233	27.9506	0	25.4097	0.0124706	0.0149789	0	0.0111691	0.745654
ENST00000293471.11	chr19	1089	1	3165	1821	421	878	ZNF613	TAA	TAAA	2.90396	2.17797	0	0.72599	0.000917523	0.00119603	0	0.000826868	0.691344
ENST00000433477.4	chr4	596	-1	2903	933	13	1912	CTSO	TGA	TGAC	2.17797	1.08899	0	1.08899	0.000750248	0.00116719	0	0.000569553	0.487971
ENST00000310397.13	chr2	1133	1	8394	4209	214	3926	SNED1	TAA	TAAG	10.1639	4.71894	0	5.44493	0.00121085	0.00112115	0	0.00138689	1.23702
ENST00000445724.3	chr21	196	-1	2497	396	281	1775	PTTG1IP	TAG	TAGA	192.75	15.6088	0	174.601	0.0771928	0.0394161	0	0.0983666	2.49559
ENST00000263681.6	chr11	768	1	3821	1368	123	2285	POLD3	TAA	TAAA	36.6625	11.9788	2.17797	22.5057	0.009595	0.00875646	0.0177071	0.00984932	1.12481
ENST00000379410.7	chr1	6	1	2404	1803	29	527	PLEKHN1	TGA	TGAT	0.362995	0.362995	0	0	0.000150996	0.000201328	0	0	0
ENST00000243082.4	chr12	427	1	2039	1104	108	782	HOXC11	TGA	TGAA	1.45198	0.72599	0	0.362995	0.000712104	0.0006576	0	0.000464188	0.705882
ENST00000369592.1	chr10	553	-1	1110	684	299	82	SMNDC1	TAA	TAAT	21.4167	18.5128	0	1.81498	0.0192943	0.0270654	0	0.0221338	0.817791
ENST00000613478.1	chr17	447	1	2074	351	118	1560	CISD3	TGA	TGAG	5.44493	3.26696	0	1.45198	0.00262533	0.00930757	0	0.000930757	0.1
ENST00000424789.6	chr17	820	1	11721	5940	-2	5738	TANC2	TAA	TAAA	73.688	17.7868	73.688	55.9012	0.00628684	0.0029944	-36.844	0.00974229	3.2535
ENST00000467460.6	chr3	849	-1	9089	1848	332	6864	PEX5L	TGA	TGAA	0.362995	0.362995	0	0	3.99378e-05	0.000196426	0	0	0
ENST00000225430.9	chr17	459	1	737	558	56	78	RPL19	TAA	TAAA	1145.61	1050.14	43.1964	0	1.55443	1.88198	0.771365	0	0
ENST00000257910.8	chr12	532	1	3678	600	110	2923	TSPAN31	TGA	TGAG	12.3418	5.08193	0	7.2599	0.00335558	0.00846989	0	0.00248372	0.293241
ENST00000302558.7	chr2	558	-1	5576	5265	186	80	RGPD8	TGA	TGAG	1.45198	1.45198	0	0	0.000260398	0.00027578	0	0	0
ENST00000392993.7	chr3	716	-1	9815	1557	124	8089	GK5	TAA	TAAC	75.503	6.17092	0	68.6061	0.00769261	0.00396334	0	0.0084814	2.13996
ENST00000548825.6	chr12	330	1	3307	2646	149	467	PRPF40B	TGA	TGAC	4.35594	4.35594	0	0	0.00131719	0.00164624	0	0	0
ENST00000320316.8	chr17	127	-1	1978	1179	172	582	PHF23	TGA	TGAT	17.0608	10.8899	0	6.17092	0.00862526	0.00923652	0	0.010603	1.14794
ENST00000268603.9	chr16	527	-1	6722	2358	475	3844	CDH11	TAA	TAAC	91.1118	58.0792	2.17797	30.8546	0.0135543	0.0246307	0.0045852	0.00802669	0.325881
ENST00000519948.3	chr12	599	1	7604	261	280	7018	ATXN7L3B	TAG	TAGC	94.3787	6.53391	2.17797	83.8519	0.0124117	0.0250341	0.00777847	0.0119481	0.477273
ENST00000299237.2	chr16	513	-1	4221	1716	617	1843	ZNF319	TGA	TGAC	3.62995	1.08899	0.362995	2.17797	0.000859974	0.000634607	0.000588323	0.00118175	1.86218
ENST00000449934.7	chr6	220	1	1370	966	32	327	MICA	TAA	TAAG	2.90396	1.81498	0	1.08899	0.00211968	0.00187886	0	0.00333023	1.77248
ENST00000328459.11	chr14	426	-1	19471	2499	129	16798	TTC7B	TGA	TGAG	43.1964	30.8546	0	10.5269	0.0022185	0.0123468	0	0.000626673	0.050756
ENST00000372393.7	chr9	563	1	1548	1206	69	228	ASS1	TAG	TAGA	12.3418	11.6158	0	0.362995	0.00797276	0.00963171	0	0.00159208	0.165296
ENST00000426216.6	chr18	236	1	4361	3411	11	894	ATP9B	TAA	TAAG	4.71894	4.35594	0	0.362995	0.00108208	0.00127703	0	0.000406035	0.317953
ENST00000361432.3	chr10	601	1	2441	1041	24	1331	FAM45A	TGA	TGAC	7.6229	5.80792	0	1.81498	0.00312286	0.00557918	0	0.00136362	0.244412
ENST00000209873.9	chr12	414	-1	1815	1608	139	23	AAAS	TAA	TAAG	5.08193	5.08193	0	0	0.00279996	0.00316041	0	0	0
ENST00000346562.6	chr14	142	1	5847	2673	68	3061	NPAS3	TGA	TGAG	0.362995	0.362995	0	0	6.20823e-05	0.000135801	0	0	0
ENST00000262844.10	chrX	497	-1	5350	969	8	4328	AMMECR1	TGA	TGAC	150.643	19.9647	0	130.315	0.0281576	0.0206034	0	0.0301098	1.4614
ENST00000478753.4	chr16	377	-1	2551	1314	448	744	SEPHS2	TGA	TGAG	31.9436	15.2458	0	16.3348	0.012522	0.0116026	0	0.0219553	1.89228
ENST00000291232.4	chr22	299	-1	3944	522	39	3338	TNFRSF13C	TAG	TAGC	1.08899	0	0	1.08899	0.000276112	0	0	0.000326239	0
ENST00000515763.1	chr5	281	1	347	138	77	87	COX7C	TGA	TGAA	54.4493	26.8616	18.8757	0.72599	0.156914	0.19465	0.24514	0.00834472	0.0428705
ENST00000267430.10	chr14	182	1	7131	6114	96	876	FANCM	TAA	TAAT	24.3207	22.1427	0	1.81498	0.00341056	0.00362164	0	0.00207189	0.572086
ENST00000325722.8	chr1	447	-1	4777	3117	219	1396	KIAA0319L	TAG	TAGC	27.5876	12.7048	0.362995	13.7938	0.0057751	0.00407598	0.00165751	0.00988096	2.42419
ENST00000537449.5	chr5	119	1	4419	1884	42	2448	GHR	TAG	TAGC	6.17092	3.26696	0	2.90396	0.00139645	0.00173405	0	0.00118626	0.684096
ENST00000361762.3	chr4	136	1	6403	3177	1002	2179	PCDH7	TGA	TGAA	58.8052	44.6484	1.08899	11.2528	0.00918401	0.0140536	0.00108681	0.00516423	0.367465
ENST00000409218.5	chr2	234	-1	648	408	132	63	MCFD2	TAG	TAGA	45.3744	33.0326	0	6.89691	0.0700222	0.0809621	0	0.109475	1.35217
ENST00000326446.9	chr2	688	1	2805	648	705	1407	ARL6IP6	TAA	TAAA	31.9436	19.2387	0.362995	10.5269	0.0113881	0.0296894	0.000514887	0.00748178	0.252001
ENST00000228136.9	chr11	215	1	3920	519	126	3230	C11orf58	TAA	TAAC	149.554	82.7629	15.9718	40.6555	0.0381515	0.159466	0.12676	0.0125868	0.0789311
ENST00000292841.9	chr19	667	-1	8618	2277	253	6043	ZNF585A	TGA	TGAG	11.9788	1.81498	2.17797	7.6229	0.00138998	0.000797091	0.00860858	0.00126144	1.58256
ENST00000399756.8	chr17	48	-1	4068	2487	521	1015	TRPV1	TGA	TGAG	1.08899	0	0	0.72599	0.000267696	0	0	0.000715261	0
ENST00000237305.11	chr6	770	-1	2401	1263	83	1010	SGK1	TGA	TGAA	13.7938	9.80087	0	3.62995	0.00574503	0.00775999	0	0.00359401	0.463146
ENST00000373654.1	chr9	468	-1	2047	1293	206	503	ZBTB26	TGA	TGAG	10.8899	7.98589	0	2.54097	0.00531991	0.00617625	0	0.00505162	0.817911
ENST00000224652.10	chr10	614	-1	4930	1524	108	3253	ATE1	TGA	TGAC	79.8589	33.7585	0	45.3744	0.0161986	0.0221513	0	0.0139485	0.629692
ENST00000518235.5	chr5	762	-1	1244	657	4	538	MRNIP	TAA	TAAA	0.72599	0.362995	0	0.362995	0.000583593	0.000552504	0	0.000674712	1.22119
ENST00000513140.5	chr4	164	-1	4166	2178	464	1479	APBB2	TAG	TAGC	26.8616	14.8828	2.90396	9.07488	0.00644782	0.00683324	0.00625854	0.00613582	0.897937
ENST00000360321.7	chr20	5	-1	1576	1059	134	338	C20orf96	TAG	TAGA	1.45198	1.45198	0	0	0.000921307	0.00137109	0	0	0
ENST00000327473.9	chr19	143	1	3816	528	111	3132	TNFAIP8L1	TGA	TGAA	4.35594	0	0	4.35594	0.00114149	0	0	0.00139079	0
ENST00000610330.1	chr6	543	-1	632	354	38	195	KHDC1	TGA	TGAT	0.72599	0.72599	0	0	0.00114872	0.00205082	0	0	0
ENST00000374467.4	chr6	311	-1	2170	603	277	1245	BAK1	TGA	TGAC	3.62995	0.72599	0	2.90396	0.00167279	0.00120396	0	0.0023325	1.93735
ENST00000259526.4	chr8	472	1	2463	1041	81	1296	CCN3	TAA	TAAC	0.362995	0	0	0.362995	0.000147379	0	0	0.000280089	0
ENST00000285605.8	chr10	454	1	3213	489	141	2538	MARVELD1	TGA	TGAG	80.5849	1.45198	0	79.1329	0.0250809	0.00296929	0	0.0311792	10.5006
ENST00000320285.9	chr6	889	-1	7923	1104	207	6567	AGPAT4	TGA	TGAC	10.1639	0	0	10.1639	0.00128283	0	0	0.00154772	0
ENST00000446558.5	chr2	956	1	495	195	14	241	RPL37A	TAA	TAAC	627.619	409.458	145.924	0	1.26792	2.09979	10.4231	0	0
ENST00000322716.7	chr3	142	-1	8126	1791	85	6205	EPM2AIP1	TAA	TAAG	83.1259	19.2387	0.72599	61.7092	0.0102296	0.0107419	0.00854106	0.00994507	0.925821
ENST00000617612.2	chr11	318	1	1247	336	262	604	C11orf96	TAA	TAAG	0.362995	0	0	0.362995	0.000291095	0	0	0.000600985	0
ENST00000395116.1	chr14	254	-1	4578	1452	110	2971	GPR135	TAA	TAAG	3.26696	0	0	2.90396	0.000713621	0	0	0.000977436	0
ENST00000223023.5	chr7	602	-1	4363	1485	263	2570	WASL	TGA	TGAT	84.2149	29.0396	2.17797	52.2713	0.0193021	0.0195553	0.00828126	0.020339	1.04008
ENST00000393010.6	chr3	709	1	3160	1410	272	1433	PXYLP1	TAA	TAAA	10.5269	5.44493	2.54097	2.54097	0.00333128	0.00386165	0.00934179	0.00177318	0.459177
ENST00000358065.4	chr3	8	1	2443	2022	61	315	SETMAR	TAA	TAAT	6.17092	6.17092	0	0	0.00252596	0.00305189	0	0	0
ENST00000415061.8	chr19	1170	-1	1870	963	110	752	RDH13	TAA	TAAC	3.62995	0.362995	0	3.26696	0.00194115	0.000376942	0	0.00434436	11.5253
ENST00000569453.5	chr16	759	1	1852	1323	387	97	DEF8	TAG	TAGC	3.99295	3.26696	0.362995	0	0.00215602	0.00246935	0.000937972	0	0
ENST00000379405.3	chr9	120	1	834	711	33	45	PRSS3	TAA	TAAA	5.44493	5.44493	0	0	0.00652869	0.00765812	0	0	0
ENST00000369762.7	chrX	746	1	2054	1380	10	619	ATP6AP1	TGA	TGAC	6.53391	3.62995	0	2.90396	0.00318107	0.0026304	0	0.00469137	1.78352
ENST00000302754.6	chr19	346	1	1830	1011	280	494	JUNB	TGA	TGAA	2.54097	1.45198	0.362995	0.362995	0.00138851	0.00143618	0.00129641	0.000734808	0.51164
ENST00000299957.11	chr15	147	1	3974	1278	305	2346	CASC4	TAA	TAAG	185.491	56.6272	1.45198	126.322	0.046676	0.0443093	0.00476059	0.0538458	1.21523
ENST00000511685.6	chr4	658	1	10923	8067	144	2667	TENM3	TAA	TAAC	66.4281	54.4493	0.72599	10.8899	0.00608149	0.00674963	0.0050416	0.00408318	0.604949
ENST00000265643.4	chr11	705	1	749	339	183	182	GAL	TGA	TGAG	3.26696	2.54097	0	0.362995	0.00436176	0.00749547	0	0.00199448	0.266091
ENST00000218176.4	chrX	212	-1	4718	1911	1567	1195	KCND1	TGA	TGAG	0.362995	0	0	0.362995	7.69383e-05	0	0	0.000303762	0
ENST00000330188.13	chr1	1168	-1	2108	714	80	1269	TPM3	TAG	TAGA	820.006	349.564	30.4916	414.903	0.388997	0.489586	0.381145	0.326953	0.667816
ENST00000216297.7	chr14	47	-1	4433	3111	86	1191	SUPT16H	TAA	TAAC	167.704	76.592	0.362995	89.6598	0.0378308	0.0246197	0.00422087	0.0752811	3.05776
ENST00000589296.5	chr17	981	-1	2159	162	68	1884	CYTH1	TAA	TAAG	14.1568	1.45198	0	12.7048	0.00655711	0.00896284	0	0.00674354	0.752389
ENST00000599612.2	chr19	478	1	1408	588	94	681	MPV17L2	TGA	TGAA	6.89691	2.54097	0	4.35594	0.00489837	0.00432137	0	0.00639639	1.48018
ENST00000372236.8	chr6	440	1	3540	2109	289	1097	POLH	TAG	TAGT	9.80087	4.71894	0.362995	4.71894	0.00276861	0.00223752	0.00125604	0.00430167	1.92252
ENST00000425651.7	chr7	556	-1	6186	3882	4	2255	NRCAM	TAA	TAAT	0.362995	0.362995	0	0	5.86801e-05	9.35072e-05	0	0	0
ENST00000615550.5	chr6	525	1	2303	1497	75	686	PRIM2	TAG	TAGG	12.7048	8.34889	1.45198	2.17797	0.00551664	0.00557708	0.0193597	0.00317488	0.569274
ENST00000543171.5	chr12	853	1	1777	993	298	441	P2RX4	TGA	TGAG	1.08899	1.08899	0	0	0.000612822	0.00109666	0	0	0
ENST00000317005.2	chr4	385	1	2083	1545	152	341	TIGD2	TAA	TAAT	7.6229	6.89691	0	0.72599	0.00365958	0.00446402	0	0.002129	0.476925
ENST00000261590.13	chr18	95	1	5697	3324	69	2259	DSG2	TAA	TAAA	26.4986	9.80087	0	16.3348	0.00465133	0.00294852	0	0.00723098	2.45241
ENST00000634607.1	chr7	71	1	3407	2814	414	134	PHF14	TAA	TAAA	51.1823	49.3673	1.08899	0	0.0150227	0.0175435	0.0026304	0	0
ENST00000442196.7	chr15	214	-1	3453	2391	42	975	CCPG1	TGA	TGAT	7.6229	6.53391	0.362995	0.72599	0.00220762	0.00273271	0.00864274	0.000744605	0.272479
ENST00000374787.7	chr9	368	1	4266	3561	330	330	SMC2	TAA	TAAA	67.5171	62.0722	1.45198	2.90396	0.0158268	0.0174311	0.00439994	0.00879988	0.504838
ENST00000422871.5	chr22	329	1	3462	963	418	2036	PARVG	TGA	TGAC	1.81498	1.08899	0.72599	0	0.000524256	0.00113083	0.00173682	0	0
ENST00000249501.4	chr2	786	1	1989	990	249	705	HOXD10	TAG	TAGG	18.5128	9.80087	2.90396	5.80792	0.00930757	0.00989987	0.0116625	0.00823819	0.832151
ENST00000370187.8	chr10	495	1	6024	1785	10	4184	BTRC	TAA	TAAA	63.5241	21.7797	0	41.7444	0.0105452	0.0122015	0	0.00997716	0.817698
ENST00000311413.4	chr11	1022	1	2787	1269	590	883	RNF26	TGA	TGAA	45.0114	16.6978	3.99295	23.9577	0.0161505	0.0131582	0.00676771	0.0271321	2.06199
ENST00000254901.9	chr5	459	1	2099	726	116	1212	REEP2	TGA	TGAG	2.90396	1.45198	0	1.45198	0.0013835	0.00199997	0	0.001198	0.59901
ENST00000261658.7	chr16	216	1	2903	1320	135	1403	BFAR	TGA	TGAC	52.2713	25.4097	4.71894	21.0537	0.018006	0.0192497	0.0349551	0.0150062	0.779554
ENST00000312106.5	chr11	642	-1	2619	2310	132	132	CATSPER1	TGA	TGAC	1.81498	1.81498	0	0	0.000693003	0.000785704	0	0	0
ENST00000333050.7	chr16	180	-1	1439	609	19	766	TMEM186	TGA	TGAA	1.81498	0	0	1.81498	0.00126128	0	0	0.00236942	0
ENST00000378164.7	chr8	474	-1	5027	3567	271	1144	TAF2	TGA	TGAG	57.3532	44.6484	1.45198	10.8899	0.011409	0.0125171	0.00535786	0.0095191	0.76049
ENST00000310144.11	chr17	830	1	1331	1188	54	44	PSMC5	TGA	TGAG	15.9718	15.2458	0.362995	0	0.0119998	0.0128332	0.00672213	0	0
ENST00000374700.7	chr2	874	1	4928	3984	89	810	AOX1	TGA	TGAA	1.45198	1.08899	0	0.362995	0.000294639	0.00027334	0	0.000448142	1.63951
ENST00000377191.5	chr20	122	1	3408	2820	62	481	XRN2	TAA	TAAG	86.7558	82.7629	1.45198	2.54097	0.0254565	0.0293485	0.023419	0.00528267	0.179998
ENST00000320672.8	chr5	272	-1	8780	1053	205	7477	SSBP2	TGA	TGAT	25.4097	14.5198	0.362995	10.5269	0.00289404	0.013789	0.00177071	0.0014079	0.102103
ENST00000641949.1	chr4	510	-1	1640	732	25	838	MFSD8	TAG	TAGC	3.26696	1.45198	0	0	0.00199205	0.00198358	0	0	0
ENST00000371485.7	chr10	410	1	2638	1362	298	933	CEP55	TAG	TAGC	141.568	82.7629	3.62995	51.5453	0.0536649	0.0607657	0.012181	0.0552468	0.909178
ENST00000228251.9	chr12	137	-1	1931	1086	206	594	YBX3	TAA	TAAC	475.161	386.953	1.81498	76.229	0.24607	0.35631	0.00881056	0.128332	0.360168
ENST00000221566.7	chr19	86	-1	2231	909	58	1219	SGTA	TGA	TGAC	7.6229	1.81498	0	5.80792	0.00341681	0.00199667	0	0.0047645	2.38622
ENST00000301215.7	chr19	797	1	4023	1980	219	1779	ZNF526	TGA	TGAC	2.90396	0.362995	0	2.17797	0.00072184	0.000183331	0	0.00122427	6.67791
ENST00000377833.9	chr10	74	-1	11933	10839	46	1003	CUBN	TAA	TAAG	2.54097	2.54097	0	0	0.000212936	0.000234428	0	0	0
ENST00000645500.1	chr11	871	-1	2880	1602	372	861	CCDC82	TAA	TAAC	12.7048	11.2528	0.362995	0.362995	0.0044114	0.00702425	0.000975793	0.000421597	0.0600202
ENST00000338165.8	chr17	732	1	2339	1680	76	538	EME1	TGA	TGAT	3.62995	2.90396	0.72599	0	0.00155192	0.00172855	0.0095525	0	0
ENST00000234256.4	chr2	292	1	4563	1566	239	2713	SLC1A4	TGA	TGAT	15.9718	1.45198	0	14.1568	0.00350028	0.000927191	0	0.00521814	5.6279
ENST00000539664.2	chr7	143	-1	4935	2403	240	2247	TRIL	TAG	TAGG	4.71894	0	0	4.71894	0.000956218	0	0	0.00210011	0
ENST00000367993.7	chr1	1331	1	2042	1359	442	196	NDUFS2	TGA	TGAG	10.1639	8.71188	0	0.362995	0.00497741	0.00641051	0	0.00185202	0.288903
ENST00000541970.5	chr6	921	-1	3378	1002	73	2258	PDCD2	TAA	TAAA	33.7585	23.5947	0	9.43787	0.00999365	0.0235476	0	0.00417975	0.177502
ENST00000264607.9	chr2	1116	1	6891	975	138	5733	ASB1	TAG	TAGA	43.1964	3.26696	0	39.5665	0.00626853	0.00335072	0	0.00690153	2.05971
ENST00000336702.7	chr11	1014	1	4771	2091	353	2282	C2CD2L	TGA	TGAG	3.26696	2.54097	0	0.72599	0.000684753	0.00121519	0	0.000318138	0.2618
ENST00000287380.6	chr8	484	1	3478	3168	57	208	TBC1D31	TAG	TAGA	29.4026	29.4026	0	0	0.00845388	0.00928113	0	0	0
ENST00000367090.3	chr6	869	1	5390	1806	5	3534	TMEM181	TGA	TGAG	231.228	48.6413	0	181.498	0.0428994	0.0269332	0	0.0513575	1.90685
ENST00000353632.6	chr19	633	-1	3741	3573	-5	128	NPHS1	TAA	TAAG	0.362995	0.362995	0.362995	0	9.70316e-05	0.000101594	-0.072599	0	0
ENST00000356083.8	chr9	426	1	7813	5550	408	1810	COL27A1	TGA	TGAC	9.43787	5.80792	0	3.62995	0.00120797	0.00104647	0	0.0020055	1.91644
ENST00000397345.7	chr2	682	-1	26202	25545	197	415	NEB	TAG	TAGG	31.2176	31.2176	0	0	0.00119142	0.00122206	0	0	0
ENST00000534064.6	chr11	802	-1	3146	2859	19	223	INTS4	TAA	TAAG	6.89691	6.53391	0	0.362995	0.00219228	0.00228538	0	0.00162778	0.712257
ENST00000298894.5	chr14	445	-1	2407	1023	357	982	MOAP1	TGA	TGAG	6.53391	3.99295	0	2.54097	0.00271455	0.00390317	0	0.00258754	0.662933
ENST00000259199.8	chr2	575	1	1812	1155	172	440	CBWD2	TAA	TAAC	4.71894	2.17797	1.81498	0	0.00260427	0.00188569	0.0105522	0	0
ENST00000400809.8	chr1	29	-1	3112	1530	23	1514	CCNL2	TGA	TGAG	5.44493	5.08193	0	0.362995	0.00174966	0.00332152	0	0.000239759	0.0721834
ENST00000513702.5	chr4	168	1	1092	711	146	190	TMEM33	TAG	TAGT	51.1823	35.2105	6.17092	5.44493	0.0468702	0.0495225	0.0422666	0.0286575	0.578676
ENST00000367510.8	chr1	1493	1	3407	978	88	2296	RNF2	TGA	TGAG	45.3744	33.3956	2.90396	9.07488	0.013318	0.0341468	0.0329996	0.00395247	0.11575
ENST00000587394.6	chr19	70	-1	937	801	18	73	PLEKHJ1	TAG	TAGC	9.07488	8.71188	0	0	0.00968504	0.0108763	0	0	0
ENST00000261292.9	chr18	150	1	10418	1470	246	8657	LIPG	TGA	TGAG	85.3039	9.07488	0	75.866	0.00818812	0.00617339	0	0.00876354	1.41957
ENST00000367267.5	chr1	1562	-1	7614	1227	187	6155	SYT2	TAG	TAGA	0.362995	0	0	0.362995	4.76747e-05	0	0	5.89756e-05	0
ENST00000394169.5	chr17	475	-1	2230	429	1489	267	ORMDL3	TGA	TGAG	2.17797	1.45198	0	0.72599	0.000976668	0.00338457	0	0.00271906	0.803371
ENST00000541050.5	chr12	739	-1	2487	1392	220	830	CORO1C	TGA	TGAA	53.3603	22.5057	0	30.1286	0.0214557	0.0161679	0	0.0362995	2.24516
ENST00000367004.3	chr1	1652	1	1827	1641	54	87	TRAF5	TAG	TAGT	2.90396	2.90396	0	0	0.00158947	0.00176963	0	0	0
ENST00000286523.9	chr14	347	-1	8091	3105	777	4164	ELMSAN1	TAA	TAAG	72.962	11.9788	0.362995	60.6202	0.00901768	0.00385792	0.000467175	0.0145582	3.77358
ENST00000008527.10	chr12	727	-1	2987	1728	582	632	CRY1	TAG	TAGA	17.0608	13.4308	1.81498	1.45198	0.00571167	0.00777246	0.00311851	0.00229744	0.295587
ENST00000303545.3	chr8	495	1	2637	1962	366	264	RNF139	TGA	TGAT	17.0608	17.0608	0	0	0.00646977	0.0086956	0	0	0
ENST00000501597.3	chr12	477	1	469	45	77	302	RPL41	TAA	TAAA	168.43	45.0114	41.7444	32.6696	0.359125	1.00025	0.542136	0.108177	0.10815
ENST00000568985.5	chr16	241	1	714	621	18	30	COQ7	TAA	TAAA	10.1639	6.53391	0	1.45198	0.0142351	0.0105216	0	0.0483993	4.6
ENST00000315930.11	chrX	642	-1	19575	705	708	18117	FGF13	TAG	TAGC	0.362995	0	0	0.362995	1.85438e-05	0	0	2.00362e-05	0
ENST00000523207.2	chr8	317	1	3748	2703	748	252	KCNB2	TGA	TGAC	0.362995	0	0.362995	0	9.68504e-05	0	0.000485288	0	0
ENST00000369583.4	chr10	554	1	2477	1122	209	1101	DUSP5	TAA	TAAA	11.9788	4.35594	0	7.6229	0.00483603	0.0038823	0	0.00692361	1.78338
ENST00000373115.5	chr10	286	1	6934	1407	401	5081	CHST3	TAG	TAGG	30.1286	1.81498	0	28.3136	0.00434505	0.00128996	0	0.00557245	4.31986
ENST00000336615.9	chr11	35	1	2416	1482	184	705	PNPLA2	TGA	TGAG	1.81498	0.72599	0	1.08899	0.000751232	0.000489872	0	0.00154466	3.15319
ENST00000287008.7	chr5	524	-1	4793	3681	142	925	PCDH1	TGA	TGAG	0.72599	0.72599	0	0	0.000151469	0.000197226	0	0	0
ENST00000215882.10	chr22	22	-1	1548	903	57	543	SLC25A1	TAA	TAAG	35.2105	19.9647	0	13.4308	0.0227458	0.0221093	0	0.0247345	1.11873
ENST00000304788.4	chr20	154	-1	3803	714	60	2984	NANP	TAA	TAAA	37.3885	8.34889	0	28.6766	0.00983132	0.0116931	0	0.00961013	0.821862
ENST00000378618.6	chr11	348	1	1166	948	46	127	C11orf49	TGA	TGAG	3.62995	3.26696	0.362995	0	0.00311317	0.00344616	0.0078912	0	0
ENST00000218516.3	chrX	425	-1	1318	1257	16	0	GLA	TAA	TAAA	1.45198	1.45198	0	0	0.00110165	0.00115512	0	0	0
ENST00000542172.1	chr11	238	1	331	90	131	65	SPTY2D1OS	TGA	TGAA	0.362995	0	0.362995	0	0.00109666	0	0.00277096	0	0
ENST00000453372.7	chr19	258	-1	12639	1248	210	11136	ZNF562	TAA	TAAA	61.7092	8.71188	1.81498	50.8193	0.00488244	0.00698068	0.00864274	0.00456352	0.653736
ENST00000394752.8	chr3	367	-1	4553	2568	382	1558	SFMBT1	TGA	TGAG	34.4845	20.6907	0.72599	12.7048	0.00757403	0.00805713	0.0019005	0.00815458	1.01209
ENST00000380639.10	chr5	213	1	11145	1134	4	9962	PTCD2	TAA	TAAC	30.4916	5.08193	0	25.4097	0.0027359	0.00448142	0	0.00255066	0.569163
ENST00000615189.5	chr22	154	1	4207	1179	93	2890	SEC14L2	TAA	TAAC	1.45198	0.72599	0	0.72599	0.000345134	0.000615768	0	0.000251208	0.407958
ENST00000416651.5	chr2	878	1	967	726	23	173	NIF3L1	TGA	TGAG	27.5876	24.3207	0.362995	0.362995	0.0285291	0.0334995	0.0157824	0.00209824	0.0626348
ENST00000619747.1	chr8	406	1	2758	921	674	1118	LAPTM4B	TAA	TAAG	262.082	67.5171	0.72599	191.661	0.0950263	0.0733085	0.00107714	0.171432	2.33851
ENST00000402377.3	chr19	553	-1	6497	1905	136	4411	ZNF681	TAG	TAGA	11.2528	3.62995	0	7.6229	0.00173201	0.00190549	0	0.00172816	0.906937
ENST00000614300.4	chr1	42	-1	2156	708	835	568	SLC35E2B	TAA	TAAA	3.26696	2.17797	1.08899	0	0.00151529	0.00307623	0.00130417	0	0
ENST00000381638.7	chr17	59	-1	11466	8853	129	2439	ZZEF1	TAG	TAGC	45.3744	25.7727	0	19.2387	0.0039573	0.00291118	0	0.00788796	2.70954
ENST00000360203.10	chr20	457	1	4630	3870	337	378	RTEL1	TGA	TGAG	12.3418	11.2528	0.362995	0.72599	0.00266562	0.00290771	0.00107714	0.00192061	0.660522
ENST00000319977.8	chr17	625	1	2725	1911	231	538	C17orf53	TGA	TGAG	1.08899	1.08899	0	0	0.000399628	0.000569851	0	0	0
ENST00000506438.5	chr5	433	-1	1305	912	128	220	PITX1	TGA	TGAC	0.72599	0.72599	0	0	0.000556314	0.000796042	0	0	0
ENST00000622500.2	chr8	552	1	2257	522	44	1646	GPIHBP1	TGA	TGAC	0.362995	0	0	0.362995	0.000160831	0	0	0.000220532	0
ENST00000325875.7	chr9	265	1	3420	1845	326	1204	RMI1	TAA	TAAT	19.6017	11.2528	1.45198	5.80792	0.0057315	0.0060991	0.00445393	0.00482386	0.790912
ENST00000601291.5	chr19	1018	-1	1556	1326	174	11	IRF3	TAA	TAAA	3.26696	2.90396	0.362995	0	0.00209959	0.00219002	0.00208618	0	0
ENST00000284136.10	chr7	355	-1	6265	2301	38	3881	SEMA3D	TAG	TAGT	22.8687	14.1568	0	8.71188	0.00365023	0.00615246	0	0.00224475	0.364854
ENST00000412055.6	chr3	35	-1	3775	2913	138	679	PRRT3	TGA	TGAA	1.08899	0	0	1.08899	0.000288473	0	0	0.00160381	0
ENST00000426126.6	chr12	610	1	5259	1866	643	2705	ZDHHC17	TAG	TAGC	23.2317	13.0678	0	10.1639	0.00441751	0.00700312	0	0.00375744	0.536537
ENST00000431473.4	chr1	524	1	10577	1143	137	9252	RIMKLA	TGA	TGAA	10.5269	1.08899	0	9.43787	0.000995259	0.000952743	0	0.00102009	1.07069
ENST00000395831.7	chr7	204	-1	2380	1494	41	800	POLM	TGA	TGAC	4.35594	1.81498	0	2.54097	0.00183023	0.00121484	0	0.00317621	2.6145
ENST00000526054.5	chr8	597	-1	892	633	32	182	VPS28	TGA	TGAG	3.26696	2.17797	0.362995	0.72599	0.00366251	0.00344071	0.0113436	0.00398896	1.15934
ENST00000311604.7	chr11	57	1	1699	987	169	498	LSP1	TAG	TAGG	0.362995	0	0	0.362995	0.000213652	0	0	0.000728906	0
ENST00000263196.12	chr22	19	-1	4438	1620	200	2573	DGCR2	TAG	TAGA	19.2387	3.26696	0.362995	15.6088	0.004335	0.00201664	0.00181498	0.00606638	3.00816
ENST00000378486.8	chr1	56	1	4870	4218	294	313	PLCH2	TGA	TGAC	29.7656	27.5876	0	1.81498	0.00611203	0.00654045	0	0.00579864	0.886581
ENST00000268835.7	chr17	277	1	1958	1077	253	583	PRPSAP2	TGA	TGAG	27.5876	19.9647	1.81498	4.35594	0.0140897	0.0185374	0.00717382	0.0074716	0.403056
ENST00000302851.8	chr19	257	-1	4529	1428	191	2865	ZNF561	TAG	TAGC	17.7868	9.43787	0.362995	7.98589	0.0039273	0.00660915	0.0019005	0.0027874	0.421748
ENST00000264963.8	chr2	466	-1	2397	1014	17	1321	LMAN2L	TGA	TGAG	6.89691	0.72599	0	6.17092	0.00287731	0.000715967	0	0.0046714	6.5246
ENST00000552695.6	chr12	734	1	3255	1344	137	1729	FICD	TAA	TAAC	1.81498	0.72599	0	1.08899	0.000557596	0.000540171	0	0.000629835	1.16599
ENST00000457542.7	chr15	107	1	7182	4494	230	2413	MAPKBP1	TGA	TGAG	8.34889	1.81498	0.362995	4.35594	0.00116247	0.000403866	0.00157824	0.0018052	4.46979
ENST00000315580.9	chr12	885	1	1644	1233	139	227	ARL6IP4	TGA	TGAG	19.6017	15.2458	0	3.26696	0.0119232	0.0123648	0	0.0143919	1.16394
ENST00000545668.5	chr12	245	1	3751	2880	74	752	DDX11	TGA	TGAA	20.6907	12.3418	0	8.34889	0.00551605	0.00428536	0	0.0111022	2.59074
ENST00000334126.11	chr11	762	-1	7960	7029	221	665	C2CD3	TGA	TGAC	34.8475	30.4916	1.45198	2.54097	0.00437783	0.00433797	0.00657005	0.003821	0.880827
ENST00000258494.14	chr12	715	-1	7428	2739	16	4628	ALDH1L2	TAG	TAGA	11.9788	2.17797	0	9.80087	0.00161266	0.00079517	0	0.00211773	2.66325
ENST00000620676.6	chr1	150	1	16357	13134	161	3017	VPS13D	TGA	TGAA	72.599	58.0792	0	14.5198	0.00443841	0.00442205	0	0.00481266	1.08833
ENST00000269967.4	chr19	772	1	3329	999	133	2152	CCDC97	TGA	TGAT	13.0678	1.45198	0.362995	11.2528	0.00392545	0.00145343	0.00272929	0.00522902	3.5977
ENST00000587091.6	chrX	366	1	4128	1587	139	2357	SLC16A2	TAA	TAAT	5.08193	0.362995	0	4.71894	0.00123109	0.00022873	0	0.00200209	8.75308
ENST00000346872.8	chr17	472	-1	9788	1497	180	8066	IKZF3	TGA	TGAA	0.72599	0	0	0.72599	7.41715e-05	0	0	9.00062e-05	0
ENST00000335670.11	chr15	242	-1	10827	1539	78	9165	RORA	TAA	TAAA	5.44493	1.81498	0	3.62995	0.000502903	0.00117932	0	0.000396067	0.335843
ENST00000361265.8	chr14	69	-1	2569	1584	66	874	AJUBA	TGA	TGAG	9.07488	2.90396	0	6.17092	0.00353246	0.00183331	0	0.00706055	3.85126
ENST00000544040.6	chr12	55	-1	6582	5706	249	582	CHD4	TGA	TGAA	138.664	119.425	0	17.4238	0.0210672	0.0209298	0	0.0299377	1.43039
ENST00000371120.7	chr1	697	1	2890	1344	153	1348	ATG4C	TAA	TAAA	15.6088	14.5198	0	1.08899	0.00540097	0.0108034	0	0.000807853	0.0747774
ENST00000329146.8	chr14	549	1	1857	594	707	511	CRIP2	TAG	TAGG	23.9577	7.98589	1.08899	14.5198	0.0129013	0.0134443	0.00154029	0.0284145	2.1135
ENST00000355377.7	chr16	243	1	3088	1392	401	1250	SYT17	TGA	TGAG	6.17092	5.80792	0.362995	0	0.00199835	0.00417236	0.000905225	0	0
ENST00000382125.8	chr2	9	-1	1766	1131	187	403	EIPR1	TGA	TGAC	13.0678	11.9788	0	0.362995	0.00739967	0.0105914	0	0.000900732	0.085044
ENST00000321117.9	chr2	90	-1	4279	2706	231	1297	DNMT3A	TAA	TAAG	36.6625	17.0608	0.362995	18.8757	0.00856801	0.00630479	0.00157141	0.0145534	2.30831
ENST00000217901.10	chrX	723	-1	1335	1149	43	98	IDH3G	TAG	TAGG	5.44493	5.44493	0	0	0.0040786	0.00473884	0	0	0
ENST00000263390.7	chr19	435	-1	3174	1770	257	1102	MED26	TGA	TGAC	3.26696	1.08899	0	2.17797	0.00102929	0.000615246	0	0.00197638	3.21234
ENST00000297313.8	chr8	254	1	2117	1134	99	839	RGS20	TAG	TAGG	1.08899	0.362995	0	0.72599	0.0005144	0.000320102	0	0.000865304	2.70322
ENST00000375980.9	chr1	182	1	2422	690	78	1609	EFHD2	TAG	TAGC	48.6413	9.80087	0	38.8405	0.0200831	0.0142042	0	0.0241395	1.69947
ENST00000278422.9	chr11	426	1	1645	858	20	722	TMX2	TAA	TAAG	107.447	48.6413	0.72599	53.7233	0.0653171	0.0566915	0.0362995	0.074409	1.31252
ENST00000599218.6	chrX	219	-1	2795	1815	70	865	PRICKLE3	TGA	TGAA	2.54097	1.81498	0	0.72599	0.000909111	0.000999987	0	0.000839295	0.839306
ENST00000589703.5	chr19	838	-1	2409	2016	96	252	ZNF45	TAA	TAAA	12.7048	11.6158	0	1.08899	0.0052739	0.00576183	0	0.00432137	0.75
ENST00000418543.8	chr19	336	1	1450	915	336	154	WDR83	TGA	TGAA	1.08899	1.08899	0	0	0.000751024	0.00119015	0	0	0
ENST00000626352.2	chr22	64	1	2625	1551	72	957	PPIL2	TAG	TAGA	7.6229	4.71894	0.72599	2.17797	0.00290396	0.00304251	0.0100832	0.00227583	0.748011
ENST00000219091.8	chr16	129	1	1947	1632	118	152	ZNF205	TAG	TAGG	1.45198	1.45198	0	0	0.000745753	0.000889694	0	0	0
ENST00000375661.6	chr6	245	-1	858	255	203	355	LSM2	TGA	TGAT	20.3277	11.6158	1.45198	6.17092	0.023692	0.0455523	0.00715261	0.0173829	0.381602
ENST00000592179.6	chr18	74	-1	3387	873	175	2294	ANKRD29	TAA	TAAC	0.362995	0	0	0.362995	0.000107173	0	0	0.000158237	0
ENST00000406341.5	chr3	21	1	6582	4296	184	2057	SETD5	TAG	TAGG	246.474	154.273	2.54097	88.2078	0.0374466	0.0359108	0.0138096	0.0428818	1.19412
ENST00000216264.13	chr22	349	-1	4442	1581	98	2718	CERK	TGA	TGAG	142.657	47.9154	0	93.6527	0.0321155	0.030307	0	0.0344565	1.13692
ENST00000355904.9	chr8	167	-1	1747	843	262	597	GTF2E2	TAG	TAGG	29.4026	22.8687	0	6.53391	0.0168303	0.0271277	0	0.0109446	0.403446
ENST00000522706.5	chr8	3	-1	1551	1005	30	471	ERICH1	TAA	TAAC	5.44493	3.99295	1.08899	0	0.00351059	0.00397308	0.0362995	0	0
ENST00000648322.1	chr11	296	1	2289	1551	74	619	CAT	TGA	TGAG	25.4097	22.1427	0.72599	2.54097	0.0111008	0.0142764	0.00981068	0.00410495	0.287534
ENST00000333640.11	chr12	357	-1	2960	1803	71	1041	AC139768.1	TAG	TAGG	0.362995	0.362995	0	0	0.000122633	0.000201328	0	0	0
ENST00000326665.10	chr1	737	-1	7201	4560	267	2329	ERICH3	TAG	TAGG	0.72599	0.72599	0	0	0.000100818	0.000159208	0	0	0
ENST00000221573.11	chr19	222	1	1520	972	23	480	SNAPC2	TGA	TGAG	0.362995	0	0	0.362995	0.000238813	0	0	0.00075624	0
ENST00000216034.6	chr22	251	1	2031	396	16	1574	TOMM22	TAG	TAGA	144.472	41.3814	2.17797	97.2827	0.0711335	0.104499	0.136123	0.061806	0.591453
ENST00000367569.3	chr6	813	-1	693	228	70	350	SF3B5	TGA	TGAG	40.2925	16.6978	9.43787	12.3418	0.0581421	0.0732359	0.134827	0.0352624	0.481491
ENST00000330125.10	chr22	174	-1	3647	2925	170	507	EIF4ENIF1	TGA	TGAG	8.71188	7.6229	0	0.72599	0.00238878	0.00260612	0	0.00143193	0.549451
ENST00000449105.8	chr2	192	-1	4144	1596	296	2207	HNRNPLL	TAA	TAAG	33.7585	24.6837	0.72599	7.6229	0.00814637	0.015466	0.00245267	0.00345396	0.223327
ENST00000371947.7	chr10	375	-1	3385	915	1334	1091	RNLS	TGA	TGAC	0.362995	0	0.362995	0	0.000107236	0	0.00027211	0	0
ENST00000434436.8	chr19	55	-1	5678	843	228	4562	MBD3	TAG	TAGG	39.9295	7.98589	0	31.2176	0.00703231	0.00947318	0	0.00684296	0.722351
ENST00000373048.9	chr1	478	-1	5477	2994	48	2390	EPHA10	TGA	TGAG	0.72599	0.362995	0	0.362995	0.000132553	0.000121241	0	0.000151881	1.25272
ENST00000409785.9	chr2	402	1	7500	1113	285	6057	KCMF1	TGA	TGAT	99.4607	69.6951	1.08899	26.1356	0.0132614	0.0626191	0.003821	0.00431495	0.0689079
ENST00000622669.4	chr3	791	1	2361	1512	74	730	MFSD1	TGA	TGAG	43.9224	17.7868	0	25.4097	0.0186033	0.0117637	0	0.0348078	2.9589
ENST00000595091.6	chr19	1119	1	4413	2880	213	1275	ZNF845	TAG	TAGA	13.0678	6.17092	0.362995	6.17092	0.00296121	0.00214268	0.0017042	0.00483993	2.25882
ENST00000367874.5	chr1	1372	-1	2096	975	25	1051	TADA1	TAA	TAAA	8.71188	5.44493	0	3.26696	0.00415643	0.00558454	0	0.00310843	0.556613
ENST00000355624.8	chr10	595	-1	6399	1506	772	4076	RAB11FIP2	TAA	TAAT	71.51	24.6837	3.99295	42.4704	0.0111752	0.0163902	0.00517221	0.0104196	0.635723
ENST00000622845.5	chr6	845	-1	1340	807	143	345	RMND1	TGA	TGAT	6.89691	2.54097	1.08899	2.90396	0.00514695	0.00314866	0.00761528	0.00841728	2.67329
ENST00000261884.7	chr15	263	1	2045	1713	54	233	TRIP4	TGA	TGAC	7.6229	7.2599	0	0.362995	0.00372758	0.00423812	0	0.00155792	0.367597
ENST00000373695.1	chrX	344	1	3213	2043	531	594	GCNA	TGA	TGAC	0.72599	0.72599	0	0	0.000225954	0.000355355	0	0	0
ENST00000361720.10	chr1	342	-1	2125	1545	19	516	GPATCH3	TGA	TGAC	3.26696	2.90396	0	0.362995	0.00153739	0.00187959	0	0.000703479	0.374273
ENST00000231887.8	chr3	889	-1	3801	2139	21	1596	EHHADH	TGA	TGAT	5.44493	2.90396	0.362995	2.17797	0.0014325	0.00135763	0.0172855	0.00136464	1.00517
ENST00000447017.7	chr4	79	-1	3725	1905	118	1657	ABLIM2	TGA	TGAC	0.362995	0.362995	0	0	9.74484e-05	0.000190549	0	0	0
ENST00000290795.7	chr1	586	-1	3599	1392	1216	946	GPBP1L1	TAG	TAGG	123.055	73.325	30.4916	18.1498	0.0341915	0.052676	0.0250753	0.0191858	0.364222
ENST00000315091.7	chr1	126	1	1835	855	6	929	TARDBP	TAA	TAAA	106.721	41.0184	0	61.7092	0.0581583	0.0479748	0	0.0664254	1.38459
ENST00000415083.7	chr18	82	-1	3402	1224	38	2095	SS18	TGA	TGAA	93.6527	46.8264	0.72599	45.7374	0.0275287	0.0382568	0.019105	0.0218317	0.570661
ENST00000372480.1	chr9	550	1	852	639	146	22	NTMT1	TGA	TGAG	4.71894	2.90396	0.362995	0	0.00553866	0.00454454	0.00248627	0	0
ENST00000396153.7	chr1	621	-1	6821	1920	450	4406	FAF1	TAA	TAAA	53.3603	45.0114	0.362995	6.89691	0.00782294	0.0234434	0.000806656	0.00156534	0.0667711
ENST00000204679.9	chr16	52	1	1975	885	29	1016	GNPTG	TGA	TGAC	10.1639	8.34889	0	1.08899	0.00514626	0.00943377	0	0.00107184	0.113617
ENST00000431388.3	chr17	1008	1	565	192	40	288	NDUFAF8	TAG	TAGG	19.9647	5.80792	0.362995	9.43787	0.0353358	0.0302496	0.00907488	0.0327704	1.08333
ENST00000313708.11	chr5	631	-1	5405	1743	432	3185	EBF1	TGA	TGAA	11.2528	4.35594	1.08899	5.80792	0.00208193	0.00249911	0.0025208	0.00182352	0.72967
ENST00000216237.10	chr22	281	1	3189	2085	45	1014	L3MBTL2	TGA	TGAG	4.35594	1.81498	0	2.54097	0.00136593	0.000870492	0	0.00250588	2.8787
ENST00000252622.15	chr19	77	-1	491	279	14	153	LSM7	TAG	TAGC	16.6978	11.9788	0	0	0.0340077	0.0429349	0	0	0
ENST00000625837.2	chrX	151	1	3237	2169	899	124	DDX3X	TGA	TGAG	83.4889	81.6739	1.81498	0	0.0257921	0.0376551	0.00201888	0	0
ENST00000509430.5	chr5	226	-1	3047	2307	304	391	GFM2	TAA	TAAA	20.6907	17.7868	1.81498	1.08899	0.00679052	0.00770991	0.00597031	0.00278513	0.36124
ENST00000568344.5	chr14	273	1	13978	1905	191	11837	SYT16	TAG	TAGG	2.17797	0.72599	0	1.45198	0.000155814	0.000381097	0	0.000122665	0.321872
ENST00000221954.6	chr19	780	-1	1205	702	105	353	CEACAM4	TAG	TAGG	0.362995	0	0	0.362995	0.000301241	0	0	0.00102831	0
ENST00000361673.4	chr18	180	-1	7437	6480	342	570	ALPK2	TAA	TAAC	1.08899	1.08899	0	0	0.000146428	0.000168053	0	0	0
ENST00000358867.10	chr11	817	1	989	660	17	267	TMEM126B	TAA	TAAC	45.7374	39.5665	0.72599	2.17797	0.0462461	0.0599492	0.0427053	0.00815719	0.136068
ENST00000337137.9	chr22	350	1	3758	1521	131	2061	TBC1D22A	TGA	TGAG	7.6229	4.35594	0	2.90396	0.00202845	0.00286387	0	0.00140901	0.491994
ENST00000407540.8	chr2	63	-1	2557	1428	31	1053	MATN3	TAA	TAAA	4.71894	2.90396	0	1.81498	0.0018455	0.00203359	0	0.00172362	0.847578
ENST00000263593.7	chr11	1070	-1	5583	1539	167	3832	SIAE	TGA	TGAC	2.54097	0.72599	0	1.81498	0.000455126	0.000471729	0	0.000473637	1.00404
ENST00000245544.9	chr17	919	1	2133	1938	77	73	NUP85	TGA	TGAG	3.62995	3.26696	0.362995	0	0.00170181	0.00168574	0.00471422	0	0
ENST00000323786.10	chr16	619	-1	2820	2337	5	433	COG4	TAG	TAGC	10.8899	8.34889	0	2.17797	0.00386165	0.00357248	0	0.00502996	1.40797
ENST00000342192.8	chr22	60	1	3028	432	192	2359	UBE2L3	TAA	TAAA	114.343	64.6131	4.71894	38.4775	0.037762	0.149567	0.0245778	0.0163109	0.109054
ENST00000361518.10	chr10	680	1	1084	726	24	289	ZNF511	TGA	TGAT	17.4238	9.43787	0	7.98589	0.0160736	0.0129998	0	0.0276328	2.12563
ENST00000331134.11	chr17	1014	-1	4381	1794	176	2366	NPLOC4	TAG	TAGG	26.4986	9.07488	0	17.4238	0.00604854	0.00505846	0	0.00736423	1.45582
ENST00000283254.12	chr2	726	-1	9102	5970	469	2618	SCN3A	TAA	TAAA	1.08899	1.08899	0	0	0.000119642	0.00018241	0	0	0
ENST00000333213.11	chr17	927	1	1937	1548	27	317	TSEN54	TGA	TGAC	2.54097	1.08899	0	1.08899	0.0013118	0.000703479	0	0.00343529	4.88328
ENST00000269122.7	chr17	796	1	7760	4995	268	2452	CLTC	TGA	TGAG	246.474	125.233	3.26696	111.077	0.0317621	0.0250717	0.0121901	0.0453004	1.80683
ENST00000307961.11	chr15	292	-1	2741	1251	59	1386	RPL4	TAA	TAAA	1650.9	1534.74	93.6527	7.6229	0.602299	1.22681	1.58733	0.00549993	0.0044831
ENST00000545891.5	chr12	902	-1	1790	912	217	616	CCDC92	TGA	TGAA	7.2599	3.99295	0	2.90396	0.00405581	0.00437823	0	0.00471422	1.07674
ENST00000276055.3	chrX	167	1	2289	1428	142	674	CHST7	TAG	TAGC	2.54097	0	0	2.54097	0.00111008	0	0	0.00376998	0
ENST00000223210.5	chr7	767	1	6942	3477	231	3189	ZNF862	TGA	TGAG	2.17797	1.81498	0	0.362995	0.000313738	0.000521995	0	0.000113827	0.218062
ENST00000371281.4	chr1	666	1	2356	1131	42	1138	TTC4	TGA	TGAC	21.0537	9.80087	0.362995	10.8899	0.00893621	0.00866567	0.00864274	0.00956929	1.10428
ENST00000395686.8	chr14	216	-1	5139	1374	71	3649	ERO1A	TAA	TAAA	177.142	49.3673	1.45198	123.781	0.0344701	0.0359296	0.0204504	0.033922	0.944122
ENST00000361972.8	chr10	33	-1	7922	2652	85	5140	SFMBT2	TGA	TGAG	0.72599	0	0	0.72599	9.16423e-05	0	0	0.000141243	0
ENST00000377604.8	chrX	173	1	3397	2760	384	208	RBM10	TGA	TGAG	8.71188	7.98589	0.362995	0	0.00256458	0.00289344	0.0009453	0	0
ENST00000342665.4	chr20	7	1	4630	915	324	3346	SOX12	TGA	TGAG	8.34889	1.08899	0	7.2599	0.00180322	0.00119015	0	0.00216973	1.82307
ENST00000371933.8	chr1	604	-1	5817	1455	1021	3296	EFCAB14	TAG	TAGC	140.842	53.7233	19.2387	67.1541	0.0242122	0.0369232	0.018843	0.0203744	0.551805
ENST00000339728.6	chr2	1094	-1	3866	573	489	2759	ARL4C	TGA	TGAT	57.3532	7.98589	0.362995	48.6413	0.0148353	0.013937	0.000742321	0.0176301	1.26498
ENST00000343380.6	chr20	193	-1	2690	1281	115	1249	E2F1	TGA	TGAC	30.4916	13.7938	0	16.6978	0.0113352	0.010768	0	0.0133689	1.24154
ENST00000396444.7	chr15	186	1	19026	3324	332	15325	USP8	TAA	TAAG	109.625	86.0298	2.17797	19.6017	0.00576183	0.0258814	0.00656015	0.00127907	0.0494204
ENST00000375749.8	chr20	175	1	5226	1134	56	3991	POFUT1	TGA	TGAT	198.921	14.1568	0	184.039	0.0380638	0.012484	0	0.0461134	3.69381
ENST00000375985.4	chr20	165	1	2787	1758	98	886	MYLK2	TGA	TGAG	0.72599	0.72599	0	0	0.000260492	0.000412964	0	0	0
ENST00000370867.8	chr1	739	1	3437	747	87	2558	TYW3	TAA	TAAG	113.254	25.7727	3.99295	80.2219	0.0329515	0.0345015	0.0458959	0.0313612	0.908979
ENST00000283916.10	chr4	241	-1	2817	1224	93	1455	TMPRSS11D	TAG	TAGT	0.362995	0	0	0.362995	0.000128859	0	0	0.000249481	0
ENST00000316999.9	chr6	537	1	2403	1290	242	826	SMAP1	TGA	TGAA	24.3207	19.9647	0.362995	3.99295	0.010121	0.0154765	0.00149998	0.00483408	0.312349
ENST00000375754.9	chr9	289	1	4973	1875	110	2943	SYK	TAA	TAAC	11.2528	7.2599	0	3.99295	0.00226279	0.00387195	0	0.00135676	0.350408
ENST00000325468.9	chr11	334	1	2522	2133	99	245	LARGE2	TGA	TGAG	2.90396	2.90396	0	0	0.00115145	0.00136144	0	0	0
ENST00000521613.5	chr19	950	-1	1903	1431	289	138	CARD8	TAA	TAAA	15.2458	10.5269	1.45198	2.17797	0.00801145	0.0073563	0.00502415	0.0157824	2.14543
ENST00000524851.5	chr11	778	1	866	699	-1	123	RPS3	TAA	TAAC	647.22	607.291	647.22	0	0.747368	0.868799	-647.22	0	0
ENST00000336440.3	chr14	310	-1	3026	984	1792	205	ZFP36L1	TAA	TAAG	42.1074	23.5947	6.17092	11.6158	0.0139152	0.0239783	0.00344359	0.0566627	2.36308
ENST00000361464.8	chr10	501	-1	5174	2718	416	1995	OGA	TGA	TGAC	117.247	56.9902	0	58.4422	0.0226609	0.0209677	0	0.0292943	1.39712
ENST00000376741.5	chr17	683	1	3026	1809	45	1127	SP2	TAA	TAAG	1.45198	1.08899	0	0.362995	0.000479835	0.000601982	0	0.00032209	0.535049
ENST00000379487.5	chr13	105	1	2388	1098	159	1086	WBP4	TAG	TAGT	4.35594	3.62995	0.362995	0.362995	0.0018241	0.00330597	0.00228299	0.00033425	0.101105
ENST00000548766.5	chr12	216	1	2193	1467	542	139	LRMP	TGA	TGAC	0.362995	0.362995	0	0	0.000165524	0.00024744	0	0	0
ENST00000222247.10	chr19	470	1	634	498	41	50	RPL18A	TAG	TAGG	189.483	177.505	9.80087	0	0.29887	0.356435	0.239046	0	0
ENST00000393952.3	chr11	669	1	1550	1224	183	98	LRFN4	TAA	TAAG	6.89691	6.89691	0	0	0.00444962	0.00563473	0	0	0
ENST00000358933.10	chr16	579	1	4767	4173	204	345	EDC4	TAG	TAGC	4.35594	2.17797	0	2.17797	0.00091377	0.00052192	0	0.00631296	12.0957
ENST00000297477.10	chr7	17	-1	6051	1209	86	4711	TMEM184A	TAG	TAGG	1.81498	0.72599	0	1.08899	0.000299946	0.000600488	0	0.000231158	0.38495
ENST00000261023.8	chr2	821	1	7039	3114	277	3603	ITGAV	TAA	TAAC	422.526	108.173	0	310.724	0.0600265	0.0347375	0	0.0862403	2.48263
ENST00000373237.4	chr1	450	-1	4426	573	88	3720	PSMB2	TAA	TAAC	92.5638	35.9365	1.81498	51.9083	0.0209136	0.0627164	0.0206247	0.0139538	0.222491
ENST00000502213.6	chr4	145	-1	2779	2328	224	182	TLR1	TAG	TAGA	2.17797	2.17797	0	0	0.000783725	0.000935554	0	0	0
ENST00000324324.12	chr15	170	-1	10137	1770	52	8270	MYEF2	TAA	TAAT	23.9577	6.89691	0	17.0608	0.00236339	0.00389656	0	0.00206297	0.529434
ENST00000334414.10	chr12	588	-1	12316	6615	39	5617	PTPRB	TGA	TGAG	2.54097	1.81498	0	0.72599	0.000206314	0.000274373	0	0.000129249	0.47107
ENST00000323570.8	chr4	533	1	4399	849	116	3389	ELMOD2	TAA	TAAA	32.3066	6.53391	0.72599	25.0467	0.00734407	0.00769601	0.00625854	0.00739058	0.960313
ENST00000285407.11	chr8	433	-1	2915	1410	118	1342	KLF10	TGA	TGAC	38.4775	23.5947	0	14.5198	0.0131998	0.0167338	0	0.0108195	0.646567
ENST00000312431.10	chr6	519	-1	17756	16581	120	1010	DST	TAG	TAGT	1269.39	1187.36	1.45198	79.8589	0.071491	0.0716095	0.0120998	0.0790682	1.10416
ENST00000315286.13	chr17	639	-1	2114	642	17	1410	CCDC43	TAA	TAAC	89.2968	34.1215	0	55.1753	0.0422407	0.0531488	0	0.0391314	0.736261
ENST00000367600.5	chr1	1461	1	2519	1782	5	687	QSOX1	TGA	TGAA	9.43787	1.81498	0	7.6229	0.00374667	0.0010185	0	0.0110959	10.8943
ENST00000267485.7	chr14	245	-1	6495	2292	189	3969	ARMH4	TGA	TGAA	0.362995	0	0	0.362995	5.58884e-05	0	0	9.14576e-05	0
ENST00000369966.8	chr10	511	1	3195	2670	338	142	NFKB2	TGA	TGAC	4.35594	3.99295	0.362995	0	0.00136336	0.00149549	0.00107395	0	0
ENST00000380338.9	chr9	65	-1	6724	1674	237	4768	MLLT3	TGA	TGAG	3.99295	1.81498	0	2.17797	0.000593835	0.00108421	0	0.000456789	0.421309
ENST00000652032.1	chr3	801	-1	1640	963	563	69	B3GALNT1	TAA	TAAC	8.71188	5.08193	0.72599	0.72599	0.00531212	0.00527719	0.0012895	0.0105216	1.99379
ENST00000561553.5	chr16	274	1	1415	1206	47	117	UQCRC2	TGA	TGAA	98.0087	87.8448	6.17092	1.08899	0.0692641	0.0728398	0.131296	0.00930757	0.127781
ENST00000444766.7	chr17	813	-1	5878	3582	70	2181	INTS2	TAA	TAAA	19.6017	7.98589	0	11.6158	0.00333476	0.00222945	0	0.00532593	2.3889
ENST00000344762.6	chr11	1080	1	3812	2823	172	772	CCDC15	TAA	TAAT	4.71894	3.99295	0.362995	0.362995	0.00123792	0.00141443	0.00211044	0.000470201	0.332431
ENST00000377507.7	chr1	100	-1	1923	735	161	982	TNFRSF9	TGA	TGAA	2.90396	1.45198	0	1.45198	0.00151012	0.00197548	0	0.0014786	0.748473
ENST00000236192.12	chr1	1416	-1	4977	393	199	4340	VAMP4	TGA	TGAT	26.4986	5.44493	1.45198	19.6017	0.00532422	0.0138548	0.00729638	0.00451653	0.325991
ENST00000405808.5	chr2	242	-1	299	141	5	108	FBXO11	TAA	TAAA	5.80792	5.44493	0.362995	0	0.0194245	0.0386165	0.072599	0	0
ENST00000375440.9	chr13	282	1	5821	2247	9	3520	CUL4A	TGA	TGAC	78.7699	49.0043	0	29.0396	0.013532	0.0218088	0	0.00824989	0.378283
ENST00000373443.7	chr1	429	1	2048	1350	312	341	AZIN2	TGA	TGAG	0.72599	0	0	0.72599	0.000354487	0	0	0.002129	0
ENST00000428559.7	chr12	188	1	1644	924	46	629	DERA	TAA	TAAA	27.9506	18.1498	0.72599	8.34889	0.0170016	0.0196426	0.0157824	0.0132733	0.675739
ENST00000541412.5	chr6	47	1	1177	306	379	447	TMEM14C	TAG	TAGC	45.7374	12.3418	4.35594	27.9506	0.0388593	0.0403328	0.0114932	0.0625294	1.55034
ENST00000379341.9	chrX	101	1	956	783	72	56	PRDX4	TGA	TGAG	4.35594	4.35594	0	0	0.00455642	0.00556314	0	0	0
ENST00000373736.7	chr1	390	-1	2922	591	334	1952	NKAIN1	TAG	TAGC	1.45198	0.362995	0	1.08899	0.000496913	0.000614205	0	0.000557882	0.908299
ENST00000543693.5	chr9	44	-1	7622	897	332	6348	NFIB	TGA	TGAG	8.34889	0	0.362995	7.98589	0.00109537	0	0.00109336	0.00125802	0
ENST00000334186.9	chr19	996	1	4583	3552	188	798	PPFIA3	TAG	TAGT	2.90396	1.08899	0	1.81498	0.000633638	0.000306584	0	0.00227441	7.41855
ENST00000334715.7	chr7	438	1	4079	1602	51	2381	ZSCAN25	TGA	TGAG	13.7938	2.90396	0	10.8899	0.00338167	0.00181271	0	0.00457365	2.5231
ENST00000294016.8	chr16	150	-1	7980	4029	790	3116	ADCY9	TGA	TGAG	17.7868	6.53391	0	11.2528	0.00222892	0.00162172	0	0.00361131	2.22684
ENST00000650822.1	chr7	691	1	2367	1572	532	218	TBXAS1	TGA	TGAC	5.44493	0.362995	5.08193	0	0.00230035	0.000230913	0.0095525	0	0
ENST00000361439.9	chr16	307	-1	1042	768	72	157	NSMCE1	TAG	TAGC	26.8616	22.8687	1.45198	2.17797	0.0257789	0.0297769	0.0201664	0.0138724	0.465878
ENST00000287322.5	chr8	195	1	4197	1341	9	2802	BAG4	TGA	TGAA	86.7558	36.2995	0	50.0933	0.0206709	0.027069	0	0.0178777	0.66045
ENST00000253024.10	chr19	1279	1	3364	2475	688	156	TRIM28	TGA	TGAG	18.5128	18.1498	0	0.362995	0.0055032	0.00733323	0	0.00232689	0.317308
ENST00000505803.5	chr5	333	-1	803	585	175	-2	STARD4	TGA	TGAG	25.4097	20.6907	3.99295	0	0.0316434	0.0353688	0.0228168	0	0
ENST00000359393.6	chr11	590	-1	3618	1572	405	1596	EHD1	TGA	TGAT	17.0608	5.08193	0	11.6158	0.00471553	0.00323278	0	0.0072781	2.25134
ENST00000381031.8	chr22	345	1	2566	1377	26	1118	TTC38	TGA	TGAG	2.17797	1.45198	0	0.72599	0.00084878	0.00105445	0	0.000649365	0.615832
ENST00000395647.6	chr17	278	1	2140	1806	35	254	SLC5A10	TGA	TGAC	0.362995	0.362995	0	0	0.000169624	0.000200994	0	0	0
ENST00000424358.1	chr20	213	-1	867	183	81	558	MMP24OS	TGA	TGAC	5.08193	0	0	4.71894	0.00586151	0	0	0.00845688	0
ENST00000644386.1	chr20	367	-1	1198	303	81	769	ADNP	TAA	TAAA	39.5665	11.2528	0	26.8616	0.0330271	0.0371381	0	0.0349306	0.94056
ENST00000565874.5	chr16	492	1	1976	1614	186	131	CPNE2	TGA	TGAG	15.2458	13.0678	0	1.81498	0.00771548	0.00809655	0	0.0138548	1.7112
ENST00000262850.7	chrX	289	1	1573	1092	437	-1	RRAGB	TAA	TAAA	1.81498	1.45198	0.362995	0	0.00115383	0.00132965	0.000830652	0	0
ENST00000342679.8	chr17	300	1	2303	1011	243	1004	MAP2K3	TAG	TAGG	13.0678	6.17092	0.72599	5.44493	0.00567426	0.00610378	0.00298761	0.00542323	0.888505
ENST00000407461.5	chr22	289	-1	802	582	110	65	POLR3H	TAG	TAGC	9.80087	6.53391	0	1.81498	0.0122205	0.0112267	0	0.0279227	2.48718
ENST00000335870.6	chr7	761	1	2810	1455	122	1188	ZNF212	TAA	TAAG	5.80792	2.90396	0	2.90396	0.00206688	0.00199585	0	0.00244441	1.22475
ENST00000204961.5	chrX	315	1	3303	1008	750	1500	EFNB1	TGA	TGAG	3.62995	0.362995	0	3.26696	0.00109899	0.000360114	0	0.00217797	6.048
ENST00000440238.3	chr22	50	1	2368	1785	215	323	AIFM3	TGA	TGAG	0.362995	0.362995	0	0	0.000153292	0.000203359	0	0	0
ENST00000344417.10	chr7	56	1	2178	1317	257	559	C7orf26	TAG	TAGG	3.99295	2.54097	0	1.45198	0.00183331	0.00192936	0	0.00259746	1.34628
ENST00000235532.9	chr1	466	-1	1455	1107	76	227	OSCP1	TAG	TAGC	0.362995	0	0	0.362995	0.000249481	0	0	0.0015991	0
ENST00000267163.5	chr13	145	1	4793	2754	181	1813	RB1	TGA	TGAG	49.0043	27.9506	0	19.9647	0.0102241	0.0101491	0	0.011012	1.08502
ENST00000312493.5	chr15	388	-1	11512	5208	273	5986	PEAK1	TAA	TAAT	152.821	46.1004	1.81498	104.543	0.0132749	0.00885184	0.00664826	0.0174645	1.97298
ENST00000262241.7	chr14	509	1	5751	1425	232	4049	RCOR1	TGA	TGAG	107.81	13.4308	0	94.3787	0.0187462	0.00942514	0	0.0233091	2.47308
ENST00000369250.7	chr10	579	1	2870	2184	329	312	FAM160B1	TAA	TAAG	5.44493	5.44493	0	0	0.00189719	0.0024931	0	0	0
ENST00000372853.8	chr9	528	1	2650	273	56	2276	URM1	TGA	TGAG	37.3885	8.34889	0	27.9506	0.0141089	0.030582	0	0.0122806	0.401563
ENST00000393829.6	chr17	576	1	3028	2463	161	359	ATP6V0A1	TGA	TGAG	5.80792	2.90396	0.362995	2.17797	0.00191807	0.00117903	0.00225463	0.00606677	5.14554
ENST00000600429.5	chr19	1008	1	984	675	61	203	FLT3LG	TGA	TGAC	1.08899	0.72599	0	0.362995	0.00110669	0.00107554	0	0.00178815	1.66256
ENST00000370950.7	chr1	729	1	3784	1422	76	2241	SRSF11	TGA	TGAA	79.1329	61.3462	0	17.4238	0.0209125	0.0431408	0	0.007775	0.180224
ENST00000651699.1	chr5	474	-1	1915	1107	146	617	TMEM173	TGA	TGAG	7.98589	3.26696	0	4.71894	0.00417018	0.00295118	0	0.0076482	2.59157
ENST00000529308.6	chr11	806	1	4725	3024	243	1413	USP35	TAA	TAAT	1.81498	1.81498	0	0	0.000384122	0.00060019	0	0	0
ENST00000302550.16	chr1	1822	1	4017	552	182	3238	DESI2	TAA	TAAA	193.839	22.5057	2.54097	165.889	0.0482548	0.0407712	0.0139614	0.0512319	1.25657
ENST00000206595.11	chr14	132	1	5770	2088	113	3524	G2E3	TAA	TAAA	62.0722	36.2995	3.26696	22.5057	0.0107577	0.0173848	0.0289111	0.00638641	0.367355
ENST00000272793.9	chr2	749	1	8005	5634	44	2282	UBR3	TGA	TGAC	57.7162	37.3885	0	19.9647	0.00721002	0.00663623	0	0.00874879	1.31834
ENST00000394303.8	chr17	458	-1	3711	1764	168	1734	CACNB1	TGA	TGAG	1.81498	1.08899	0	0.72599	0.00048908	0.000617339	0	0.000418679	0.678201
ENST00000545121.5	chr1	912	1	2251	1218	202	786	CEPT1	TAA	TAAT	23.5947	13.0678	1.81498	7.98589	0.0104819	0.0107289	0.00898503	0.0101602	0.946989
ENST00000233121.6	chr2	108	1	1892	813	192	842	MAPRE3	TGA	TGAG	0.72599	0.362995	0	0.362995	0.000383716	0.000446488	0	0.000431111	0.965558
ENST00000366582.8	chr1	1798	-1	8459	6402	121	1891	HEATR1	TAA	TAAG	133.582	114.706	2.17797	16.6978	0.0157917	0.0179173	0.0179998	0.00883013	0.492827
ENST00000301459.5	chr11	560	-1	2915	1539	702	629	RCOR2	TGA	TGAG	6.89691	5.44493	0	1.08899	0.00236601	0.00353796	0	0.0017313	0.489348
ENST00000339394.7	chr1	388	-1	5246	1296	166	3739	SDC3	TAG	TAGT	177.142	23.2317	0	153.547	0.033767	0.0179257	0	0.0410663	2.29092
ENST00000452020.5	chr3	99	-1	1162	846	181	90	SGO1	TAA	TAAA	21.0537	17.4238	1.45198	0.72599	0.0181185	0.0205955	0.00802199	0.00806656	0.391667
ENST00000402449.8	chr17	898	1	1560	618	440	457	RAB37	TGA	TGAA	0.362995	0.362995	0	0	0.000232689	0.000587371	0	0	0
ENST00000452445.6	chr12	277	-1	3196	2418	87	646	NELL2	TGA	TGAA	0.362995	0.362995	0	0	0.000113578	0.000150122	0	0	0
ENST00000615353.1	chr6	136	1	1294	279	715	255	HIST1H4I	TAA	TAAA	2.54097	1.81498	0.72599	0	0.00196365	0.00650529	0.00101537	0	0
ENST00000326019.10	chr2	142	1	2959	2358	276	280	SLC4A1AP	TGA	TGAT	14.5198	13.0678	1.08899	0	0.004907	0.00554191	0.0039456	0	0
ENST00000423014.3	chr1	1318	-1	567	315	69	138	TSTD1	TAG	TAGG	0.362995	0.362995	0	0	0.000640203	0.00115237	0	0	0
ENST00000503585.6	chr4	118	1	6309	714	340	5210	PACRGL	TGA	TGAA	15.6088	7.6229	0.72599	7.2599	0.00247405	0.0106763	0.00213527	0.00139346	0.130518
ENST00000331456.7	chr3	301	-1	2023	1377	105	496	TRAIP	TGA	TGAG	6.53391	5.44493	0.362995	0.72599	0.00322981	0.0039542	0.0034571	0.00146369	0.370161
ENST00000426196.6	chrX	204	1	4118	3615	281	177	HDAC6	TAA	TAAG	9.07488	8.34889	0.72599	0	0.00220371	0.00230951	0.0025836	0	0
ENST00000331573.7	chr21	128	-1	2154	834	460	815	PSMG1	TGA	TGAT	6.89691	5.80792	1.08899	0	0.00320191	0.00696394	0.00236736	0	0
ENST00000372188.5	chr10	346	1	829	657	124	3	PRXL2A	TGA	TGAT	18.8757	17.7868	0	0	0.0227693	0.0270727	0	0	0
ENST00000260762.10	chr10	406	1	3564	2382	8	1129	EXOC6	TAG	TAGA	25.4097	16.6978	0	8.34889	0.00712953	0.00700998	0	0.00739494	1.05492
ENST00000338779.11	chr16	622	-1	4979	2211	256	2467	MTSS1L	TGA	TGAT	19.9647	6.53391	0	13.4308	0.00400979	0.00295518	0	0.00544419	1.84225
ENST00000265022.8	chr3	897	-1	5802	2343	531	2883	DGKG	TAA	TAAA	1.08899	0	0	1.08899	0.000187691	0	0	0.000377726	0
ENST00000558984.1	chr14	222	-1	1705	1194	181	285	BMP4	TGA	TGAG	2.17797	1.45198	0.72599	0	0.0012774	0.00121606	0.004011	0	0
ENST00000515669.5	chr5	321	1	1573	588	258	682	C5orf30	TGA	TGAA	15.2458	11.6158	1.45198	1.81498	0.00969218	0.0197548	0.00562783	0.00266125	0.134714
ENST00000448372.5	chr12	295	-1	4679	1902	390	2342	SENP1	TGA	TGAA	65.7021	37.0255	3.62995	24.6837	0.0140419	0.0194666	0.00930757	0.0105396	0.541418
ENST00000616640.1	chr10	66	1	1537	819	591	82	RPP38	TAA	TAAT	6.89691	5.80792	1.08899	0	0.00448725	0.00709148	0.00184261	0	0
ENST00000258742.10	chr7	111	1	1571	1239	32	255	NUPL2	TAA	TAAA	29.4026	27.2246	1.45198	0	0.0187159	0.0219731	0.0453744	0	0
ENST00000304735.4	chr16	154	1	2816	1989	149	633	VASN	TAA	TAAG	0.72599	0.362995	0	0.362995	0.000257809	0.000182501	0	0.000573452	3.14218
ENST00000520733.5	chr8	462	1	369	162	126	36	UTP23	TAA	TAAA	2.90396	0	2.54097	0	0.00786981	0	0.0201664	0	0
ENST00000418929.7	chr19	1015	1	7416	6078	467	826	PRR12	TGA	TGAC	11.6158	10.1639	0	1.45198	0.00156632	0.00167224	0	0.00175785	1.05119
ENST00000269466.8	chr18	160	1	2211	1059	77	1030	ELAC1	TGA	TGAA	2.17797	1.08899	0.362995	0.362995	0.000985061	0.00102831	0.00471422	0.000352422	0.342718
ENST00000258173.11	chr16	661	-1	4247	918	37	3247	TMEM231	TAG	TAGA	11.6158	3.99295	0	6.89691	0.00273507	0.00434961	0	0.00212409	0.488339
ENST00000330288.6	chrX	607	1	1483	219	99	1120	SMIM10	TAG	TAGA	3.26696	0.362995	0	2.54097	0.00220294	0.00165751	0	0.00226872	1.36875
ENST00000306315.9	chr5	372	-1	5958	4506	430	977	ZNF608	TAA	TAAC	7.6229	7.6229	0	0	0.00127944	0.00169172	0	0	0
ENST00000388820.5	chr15	405	-1	5520	5028	238	209	ADAMTS7	TGA	TGAC	1.81498	1.81498	0	0	0.0003288	0.000360974	0	0	0
ENST00000369755.4	chr10	540	1	7827	3675	600	3507	SLK	TAA	TAAC	273.698	173.512	1.81498	96.5567	0.0349685	0.0472141	0.00302496	0.0275326	0.583143
ENST00000295522.4	chr3	920	-1	3446	603	234	2564	CLDN1	TGA	TGAC	125.596	14.8828	0.362995	109.262	0.036447	0.0246813	0.00155126	0.0426137	1.72656
ENST00000409663.7	chr4	579	1	5017	4797	46	129	TMEM131L	TGA	TGAA	3.62995	3.62995	0	0	0.00072353	0.000756713	0	0	0
ENST00000561208.6	chr15	59	-1	5486	1401	1077	2963	MEIS2	TAG	TAGT	66.4281	34.4845	6.17092	24.6837	0.0121087	0.0246142	0.00572973	0.00833063	0.338448
ENST00000394975.3	chr16	402	-1	840	459	62	274	VKORC1	TGA	TGAG	30.1286	11.9788	0	16.6978	0.0358674	0.0260977	0	0.0609408	2.3351
ENST00000257209.8	chr18	120	1	4967	4287	116	519	FHOD3	TGA	TGAC	19.9647	15.2458	0	4.71894	0.00401947	0.00355629	0	0.00909236	2.5567
ENST00000525077.2	chr11	36	1	2166	1167	683	271	CRACR2B	TGA	TGAC	1.45198	0.362995	0	1.08899	0.000670351	0.00031105	0	0.0040184	12.9188
ENST00000445224.6	chr3	792	1	1645	702	318	580	SCHIP1	TGA	TGAA	11.6158	9.80087	0	1.81498	0.0070613	0.0139614	0	0.00312927	0.224138
ENST00000229708.4	chr6	837	1	3211	702	101	2363	ULBP1	TGA	TGAG	3.62995	0.362995	0	3.26696	0.00113047	0.000517087	0	0.00138255	2.67372
ENST00000464873.5	chr3	628	-1	2126	915	745	421	RUVBL1	TGA	TGAC	25.7727	25.0467	0.362995	0	0.0121226	0.0273734	0.000487242	0	0
ENST00000354619.9	chr1	1795	-1	4567	1371	196	2955	ERO1B	TAA	TAAT	7.98589	2.54097	0	5.44493	0.00174861	0.00185337	0	0.00184261	0.994199
ENST00000249442.11	chr2	790	1	1341	759	182	355	MTX2	TAG	TAGA	32.6696	29.4026	2.54097	0	0.0243621	0.0387386	0.0139614	0	0
ENST00000317483.4	chr6	524	-1	2546	681	148	1672	RAB23	TAA	TAAG	19.9647	6.89691	0	12.7048	0.00784161	0.0101276	0	0.00759858	0.750283
ENST00000344337.11	chr3	583	-1	6888	1584	182	5077	KPNA1	TGA	TGAA	79.1329	13.4308	0	64.6131	0.0114885	0.00847905	0	0.0127266	1.50095
ENST00000273308.9	chr12	487	-1	1450	516	187	702	CNPY2	TGA	TGAA	10.8899	7.2599	0.362995	1.81498	0.00751024	0.0140696	0.00194115	0.00258544	0.183761
ENST00000010132.6	chr12	35	1	1840	1530	136	129	DYRK4	TGA	TGAC	9.80087	9.80087	0	0	0.00532656	0.0064058	0	0	0
ENST00000325217.9	chr8	612	1	592	447	89	11	ZNF7	TGA	TGAA	0.362995	0.362995	0	0	0.000613167	0.00081207	0	0	0
ENST00000570016.5	chr16	349	-1	1346	609	237	455	CDIPT	TGA	TGAC	10.5269	3.99295	0.362995	5.80792	0.00782085	0.00655656	0.00153162	0.0127647	1.94685
ENST00000616887.1	chr5	516	1	2568	2454	15	54	PCDHGA9	TGA	TGAG	2.17797	1.81498	0	0.362995	0.000848119	0.000739599	0	0.00672213	9.08889
ENST00000369301.3	chr10	572	1	11051	2148	206	8652	NHLRC2	TAG	TAGC	271.157	61.3462	0.72599	206.907	0.0245369	0.0285597	0.00352422	0.0239144	0.837348
ENST00000433867.5	chr19	918	-1	3321	2604	472	200	PRKD2	TGA	TGAG	2.90396	2.54097	0	0	0.000874424	0.000975793	0	0	0
ENST00000406606.7	chr9	612	-1	4691	2487	-3	2162	VAV2	TGA	TGAC	23.5947	13.0678	23.5947	9.80087	0.00502978	0.00525445	-7.86489	0.00453324	0.862743
ENST00000339480.2	chr1	439	1	12838	768	365	11660	GJB4	TAA	TAAC	0.362995	0	0	0.362995	2.82751e-05	0	0	3.11317e-05	0
ENST00000373795.7	chr1	383	-1	2300	1452	142	661	SRSF4	TAA	TAAC	26.8616	15.6088	0	11.2528	0.011679	0.0107499	0	0.017024	1.58365
ENST00000354287.5	chr1	134	-1	1287	858	83	301	FBXO2	TGA	TGAG	0.362995	0.362995	0	0	0.000282047	0.000423071	0	0	0
ENST00000245121.9	chr18	140	1	2833	1368	188	1232	KATNAL2	TGA	TGAA	10.5269	10.5269	0	0	0.0037158	0.00769507	0	0	0
ENST00000255559.7	chr17	879	-1	2737	975	88	1629	SLC39A11	TAG	TAGG	3.26696	0.72599	0	2.54097	0.00119363	0.000744605	0	0.00155983	2.09484
ENST00000589498.5	chr18	58	-1	2117	210	145	1717	ZNF519	TAG	TAGA	5.08193	0.72599	1.08899	2.54097	0.00240053	0.0034571	0.00751024	0.00147989	0.428072
ENST00000271651.8	chr1	1066	-1	1629	957	42	585	CTSK	TGA	TGAC	0.362995	0.362995	0	0	0.000222833	0.000379305	0	0	0
ENST00000259324.5	chr9	540	1	4619	2400	517	1657	LRRC8A	TGA	TGAG	48.2784	21.0537	1.08899	25.7727	0.0104521	0.00877238	0.00210635	0.0155538	1.77304
ENST00000422959.6	chr7	345	1	3525	2223	196	1061	PHTF2	TGA	TGAC	43.5594	22.8687	0.362995	20.3277	0.0123573	0.0102873	0.00185202	0.019159	1.86239
ENST00000305409.3	chr2	1024	-1	2434	1821	85	483	SCG2	TAA	TAAG	207.27	178.957	4.71894	17.4238	0.0851562	0.0982738	0.0555169	0.036074	0.367077
ENST00000269571.9	chr17	469	1	4545	3735	153	612	ERBB2	TGA	TGAA	3.99295	2.90396	0	1.08899	0.000878536	0.0007775	0	0.00177939	2.2886
ENST00000419127.5	chr3	516	1	2317	2121	76	75	TMPRSS7	TAA	TAAT	0.362995	0.362995	0	0	0.000156666	0.000171143	0	0	0
ENST00000381259.5	chr12	238	1	2334	1293	10	986	CCDC91	TAA	TAAA	34.4845	27.9506	0	6.53391	0.0147749	0.0216169	0	0.00662669	0.306551
ENST00000264108.5	chr2	761	1	1634	1227	34	328	HAT1	TAA	TAAA	56.2642	52.9973	1.45198	0.362995	0.0344334	0.0431926	0.0427053	0.00110669	0.0256223
ENST00000652680.1	chr6	451	1	1998	1338	203	412	SLC29A1	TGA	TGAC	20.3277	7.98589	0.362995	11.9788	0.010174	0.00596853	0.00178815	0.0290749	4.87136
ENST00000278193.7	chr11	268	-1	4842	561	11	4225	LIN7C	TAA	TAAT	266.801	56.9902	1.08899	203.64	0.0551015	0.101587	0.0989987	0.0481989	0.47446
ENST00000334304.10	chr4	120	-1	4577	3933	276	323	ADGRA3	TAA	TAAC	58.0792	57.7162	0	0.362995	0.0126894	0.0146749	0	0.00112382	0.0765816
ENST00000319023.6	chr11	725	1	2773	2088	182	458	NADSYN1	TGA	TGAG	2.54097	2.54097	0	0	0.000916324	0.00121694	0	0	0
ENST00000369314.2	chr1	1011	1	1178	624	114	395	POLR3GL	TGA	TGAA	13.7938	8.71188	0.72599	3.99295	0.0117095	0.0139614	0.00636834	0.0101087	0.724051
ENST00000463537.5	chr3	302	-1	2818	1272	182	1319	CAMKV	TAG	TAGG	1.81498	0.362995	0	1.45198	0.000644065	0.000285374	0	0.00110082	3.85747
ENST00000328703.11	chr1	1172	1	1227	807	207	168	HAX1	TAG	TAGC	29.0396	22.5057	1.45198	2.90396	0.0236672	0.0278881	0.0070144	0.0172855	0.619816
ENST00000289269.7	chr5	498	1	5725	2991	285	2404	PCDHAC2	TGA	TGAG	18.5128	5.44493	0	13.0678	0.00323367	0.00182044	0	0.00543587	2.98602
ENST00000305386.3	chr14	188	1	2687	1311	468	863	MGAT2	TGA	TGAA	54.4493	49.3673	0.72599	3.62995	0.020264	0.0376562	0.00155126	0.0042062	0.1117
ENST00000261866.12	chr15	150	-1	7772	7299	9	419	SPG11	TAG	TAGA	37.7515	36.2995	0	1.45198	0.00485737	0.00497322	0	0.00346535	0.696802
ENST00000368243.6	chr1	1235	-1	920	438	145	292	C1orf61	TGA	TGAT	0.362995	0	0	0.362995	0.00039456	0	0	0.00124313	0
ENST00000258111.5	chr12	587	1	4717	600	439	3633	KCNMB4	TAA	TAAA	5.08193	1.45198	0	3.62995	0.00107737	0.00241997	0	0.000999161	0.412882
ENST00000379822.5	chr15	338	-1	1342	849	339	109	INSYN1	TAG	TAGG	1.08899	0.72599	0.362995	0	0.000811464	0.000855112	0.00107078	0	0
ENST00000296370.4	chr4	68	1	471	255	49	122	S100P	TGA	TGAT	2.90396	2.17797	0	0.362995	0.00616552	0.00854106	0	0.00297537	0.348361
ENST00000263212.10	chr22	67	-1	5149	1332	111	3661	PPM1F	TAG	TAGG	23.9577	2.54097	0	21.4167	0.00465288	0.00190763	0	0.00584996	3.06661
ENST00000611722.1	chr10	384	1	3038	1419	72	1502	IFIT2	TGA	TGAA	16.3348	7.98589	0.362995	7.6229	0.00537682	0.00562783	0.0050416	0.00507516	0.901798
ENST00000510038.1	chr5	434	-1	1314	1086	126	57	H2AFY	TAG	TAGG	161.533	143.746	1.08899	10.5269	0.122932	0.132363	0.00864274	0.184682	1.39527
ENST00000344697.3	chr3	194	-1	2547	1710	343	449	POMGNT2	TAG	TAGC	2.17797	1.81498	0	0.362995	0.000855112	0.00106139	0	0.000808452	0.761693
ENST00000548985.1	chr12	344	1	677	141	263	228	COX14	TAG	TAGA	10.1639	2.54097	1.81498	3.99295	0.0150131	0.018021	0.00690105	0.0175129	0.971805
ENST00000371141.8	chr20	404	1	4937	945	718	3229	STX16	TAA	TAAG	42.4704	9.80087	4.35594	28.3136	0.00860248	0.0103713	0.00606677	0.00876854	0.845463
ENST00000348335.6	chr17	56	-1	3563	1485	143	1890	CAMKK1	TGA	TGAG	0.362995	0	0	0.362995	0.000101879	0	0	0.000192061	0
ENST00000372422.7	chr6	438	-1	1507	1020	113	329	YIPF3	TGA	TGAC	7.6229	3.99295	0.362995	3.26696	0.00505833	0.00391465	0.00321235	0.00992996	2.53661
ENST00000288135.5	chr4	211	1	5186	2898	91	2152	KIT	TGA	TGAG	0.362995	0.362995	0	0	6.99952e-05	0.000125257	0	0	0
ENST00000616435.5	chr14	256	1	2347	903	67	1332	JKAMP	TGA	TGAG	31.9436	19.9647	2.54097	9.07488	0.0136104	0.0221093	0.0379249	0.00681297	0.308149
ENST00000392790.6	chr10	624	-1	1958	1791	8	114	CUZD1	TAA	TAAC	0.362995	0.362995	0	0	0.000185391	0.000202677	0	0	0
ENST00000325795.7	chr2	834	-1	2692	429	781	1437	ORMDL1	TGA	TGAA	47.9154	18.8757	2.90396	23.2317	0.0177992	0.0439994	0.00371826	0.0161668	0.367432
ENST00000296585.10	chr5	137	1	7843	3513	111	4174	ITGA2	TGA	TGAA	188.031	35.9365	0	152.095	0.0239744	0.0102296	0	0.0364387	3.56209
ENST00000398706.6	chr10	312	1	6062	5496	249	272	ZSWIM8	TGA	TGAG	1.81498	1.81498	0	0	0.000299402	0.000330236	0	0	0
ENST00000263663.10	chr2	30	1	2267	1734	62	426	TAF1B	TGA	TGAG	7.98589	6.89691	0.72599	0.362995	0.00352267	0.00397746	0.0117095	0.000852101	0.214233
ENST00000382409.3	chr11	27	-1	2500	1665	479	311	DEAF1	TGA	TGAG	80.9479	69.6951	0	10.1639	0.0323792	0.0418589	0	0.0326812	0.780748
ENST00000366996.1	chr1	1656	-1	2035	1080	810	100	LPGAT1	TAG	TAGG	55.1753	52.6343	1.08899	0.72599	0.0271131	0.0487355	0.00134443	0.0072599	0.148966
ENST00000367576.6	chr6	810	1	1853	1395	134	279	LTV1	TAG	TAGA	14.8828	14.1568	0.72599	0	0.00803173	0.0101483	0.00541784	0	0
ENST00000291416.10	chr1	430	-1	3817	1395	605	1772	TRIM62	TAG	TAGT	7.2599	0.72599	0	6.53391	0.00190199	0.000520423	0	0.00368731	7.08521
ENST00000357077.9	chr4	467	1	14215	11841	70	2259	ANK2	TAA	TAAA	24.3207	14.1568	0	10.1639	0.00171092	0.00119558	0	0.00449928	3.76327
ENST00000507420.1	chr4	66	1	563	351	99	68	MRFAP1	TGA	TGAG	46.1004	25.4097	4.71894	10.5269	0.0818834	0.0723922	0.047666	0.154807	2.13845
ENST00000311915.12	chr12	551	-1	2698	1374	22	1257	C12orf66	TGA	TGAG	7.2599	2.90396	0	4.35594	0.00269085	0.00211351	0	0.00346535	1.63962
ENST00000394825.6	chr12	370	1	2485	1764	123	553	NR4A1	TGA	TGAC	3.26696	1.81498	0	1.45198	0.00131467	0.0010289	0	0.00262564	2.5519
ENST00000591952.5	chr17	975	1	582	222	3	312	AFMID	TGA	TGAC	11.9788	4.71894	0	6.89691	0.0205822	0.0212565	0	0.0221055	1.03994
ENST00000254976.6	chr20	83	1	2053	588	205	1215	SNAP25	TAA	TAAG	10.8899	3.62995	2.54097	2.90396	0.00530436	0.00617339	0.012395	0.00239009	0.38716
ENST00000263245.10	chr22	314	-1	2728	1518	85	1080	ARFGAP3	TAA	TAAT	13.4308	7.6229	0.362995	5.08193	0.00492332	0.00502167	0.00427053	0.00470549	0.937037
ENST00000648613.1	chr10	574	-1	7343	2664	398	4236	CCDC186	TAA	TAAA	39.2035	18.5128	0.72599	19.2387	0.00533889	0.00694923	0.0018241	0.00454172	0.653558
ENST00000564138.6	chr16	682	1	8666	3765	175	4681	PLCG2	TAG	TAGA	2.17797	1.81498	0	0.362995	0.000251324	0.000482065	0	7.75465e-05	0.160863
ENST00000348956.7	chr14	518	-1	1420	1113	71	191	CKB	TGA	TGAA	51.5453	45.7374	0.362995	3.26696	0.0362995	0.0410938	0.00511261	0.0171045	0.41623
ENST00000380516.7	chr15	231	-1	4168	3072	108	943	SLTM	TGA	TGAA	103.817	94.0157	0	9.80087	0.024908	0.0306041	0	0.0103933	0.339605
ENST00000360409.7	chr2	908	1	6662	2763	785	3069	NRP2	TGA	TGAC	9.43787	2.90396	0	6.53391	0.00141667	0.00105102	0	0.002129	2.02566
ENST00000369682.4	chrX	749	1	10885	5583	169	5088	PLXNA3	TAA	TAAG	5.08193	2.90396	0.362995	1.81498	0.000466875	0.000520143	0.0021479	0.000356717	0.685805
ENST00000312037.6	chr5	581	-1	712	423	202	42	RPS14	TGA	TGAA	147.376	137.938	2.54097	0	0.206989	0.326095	0.012579	0	0
ENST00000368709.5	chr1	1149	-1	457	261	61	90	S100A2	TGA	TGAA	15.9718	14.5198	0.72599	0	0.0349492	0.0556314	0.0119015	0	0
ENST00000398013.7	chr15	8	1	2280	1050	322	863	NIPA2	TAA	TAAG	115.069	33.0326	8.71188	71.51	0.0504691	0.0314596	0.0270555	0.0828622	2.63392
ENST00000263033.9	chrX	413	-1	2335	1983	182	125	SYTL4	TGA	TGAG	2.54097	2.17797	0	0.362995	0.00108821	0.00109832	0	0.00290396	2.644
ENST00000242351.10	chr7	685	-1	7177	2676	383	4073	ZC3HAV1	TAG	TAGA	209.811	34.4845	0.362995	173.875	0.0292338	0.0128866	0.000947768	0.0426896	3.31271
ENST00000470557.2	chr17	797	-1	4114	507	3441	121	PTRH2	TAG	TAGG	11.9788	7.2599	4.35594	0	0.00291173	0.0143193	0.00126589	0	0
ENST00000284776.11	chr4	683	-1	5996	3270	504	2177	SORBS2	TGA	TGAA	3.26696	2.17797	0.72599	0	0.000544856	0.000666046	0.00144046	0	0
ENST00000339664.6	chr9	363	1	3021	1848	123	1005	ZNF189	TAA	TAAA	14.5198	9.07488	0.72599	4.35594	0.00480629	0.00491065	0.00590236	0.00433427	0.882627
ENST00000606911.6	chr1	1459	1	8704	1719	185	6755	TOR1AIP1	TAA	TAAG	141.931	76.229	1.08899	64.2501	0.0163064	0.044345	0.00588641	0.00951149	0.214489
ENST00000537259.5	chr15	284	1	3983	3006	618	314	SLC24A1	TAA	TAAT	10.1639	9.80087	0	0.362995	0.00255181	0.00326044	0	0.00115604	0.354565
ENST00000481445.1	chrX	378	1	2471	210	110	2106	COX7B	TAA	TAAT	77.681	45.7374	21.4167	2.90396	0.0314371	0.217797	0.194697	0.0013789	0.00633112
ENST00000261438.10	chr4	143	1	5594	1005	296	4248	KLF3	TGA	TGAT	90.7488	27.5876	1.08899	61.3462	0.0162225	0.0274504	0.003679	0.0144412	0.526083
ENST00000394089.6	chr17	487	1	2024	1356	524	99	RARA	TGA	TGAC	4.71894	4.35594	0.362995	0	0.00233149	0.00321235	0.000692739	0	0
ENST00000294244.9	chr11	558	1	1954	1113	225	571	SPINDOC	TAA	TAAA	31.9436	19.2387	0	12.3418	0.0163478	0.0172855	0	0.0216144	1.25044
ENST00000357765.6	chr2	485	1	1143	747	146	205	UNC50	TAA	TAAA	9.07488	7.98589	1.08899	0	0.00793953	0.0106906	0.0074588	0	0
ENST00000335016.9	chr4	331	1	3804	3453	160	146	BMP2K	TAG	TAGA	47.1894	45.0114	0	2.17797	0.0124052	0.0130354	0	0.0149176	1.14439
ENST00000395288.6	chr11	361	-1	2460	1524	165	726	KBTBD4	TAA	TAAG	9.43787	3.62995	0.362995	5.44493	0.00383653	0.00238186	0.00219997	0.0074999	3.14876
ENST00000269033.7	chr17	346	-1	9327	4239	146	4897	SSH2	TGA	TGAT	58.0792	20.6907	0.362995	37.0255	0.006227	0.00488104	0.00248627	0.00756085	1.54903
ENST00000334220.9	chr14	366	1	2813	1329	32	1407	DLST	TAG	TAGG	36.2995	10.5269	0.72599	24.3207	0.0129042	0.00792089	0.0226872	0.0172855	2.18227
ENST00000303383.8	chr16	429	-1	5177	1986	14	3132	SHCBP1	TGA	TGAC	30.4916	12.7048	0	17.7868	0.00588982	0.00639719	0	0.00567904	0.887739
ENST00000396908.8	chr19	630	1	2149	1410	57	637	PROSER3	TGA	TGAA	2.90396	1.08899	0	1.81498	0.00135131	0.00077233	0	0.00284926	3.68917
ENST00000535902.6	chr12	157	-1	5532	1263	259	3965	MANSC1	TAA	TAAG	17.0608	13.0678	0	3.62995	0.00308401	0.0103467	0	0.000915498	0.0884826
ENST00000393486.5	chr7	572	1	4393	708	379	3261	MDFIC	TAA	TAAA	155.725	45.0114	1.45198	108.899	0.0354484	0.0635754	0.00383108	0.0333942	0.525269
ENST00000261778.2	chr16	599	1	4893	3252	81	1515	TANGO6	TAG	TAGA	6.17092	3.26696	0	2.90396	0.00126117	0.0010046	0	0.00191681	1.90803
ENST00000506646.5	chr4	4	-1	935	366	153	371	ZNF721	TAG	TAGG	3.99295	2.17797	1.08899	0.72599	0.00427053	0.00595074	0.00711755	0.00195685	0.328841
ENST00000261558.8	chr14	241	1	11675	1440	338	9852	AP5M1	TAA	TAAT	114.706	45.0114	9.07488	60.6202	0.00982496	0.0312579	0.0268488	0.00615308	0.196849
ENST00000341460.6	chr1	775	-1	5466	3552	14	1855	SYDE2	TGA	TGAG	9.07488	5.08193	0	3.99295	0.00166024	0.00143072	0	0.00215253	1.50451
ENST00000282878.6	chr5	166	1	8861	651	128	8037	RAB3C	TAG	TAGT	58.4422	7.2599	0.362995	50.8193	0.00659544	0.0111519	0.0028359	0.00632317	0.567003
ENST00000341976.5	chr22	82	-1	6940	1308	475	5112	ZNF70	TAG	TAGA	16.3348	3.99295	0.362995	11.6158	0.00235371	0.00305271	0.0007642	0.00227227	0.744345
ENST00000279392.7	chr16	355	-1	3388	1638	825	880	HIRIP3	TGA	TGAG	2.90396	2.17797	0.362995	0.362995	0.000857131	0.00132965	0.000439994	0.000412494	0.310227
ENST00000396668.8	chr7	73	1	12351	792	128	11386	TMEM106B	TAA	TAAA	76.955	18.8757	0.72599	57.3532	0.00623067	0.023833	0.0056718	0.00503717	0.211353
ENST00000229922.7	chr6	75	1	2925	1401	147	1332	CAP2	TAA	TAAC	12.3418	9.07488	0.362995	2.90396	0.00421943	0.00647743	0.00246935	0.00218015	0.336577
ENST00000306480.11	chr4	621	-1	9953	783	81	9044	TMEM192	TGA	TGAG	51.5453	7.98589	1.81498	41.3814	0.00517887	0.0101991	0.0224071	0.00457557	0.448625
ENST00000357585.4	chr17	880	1	7685	1077	365	6198	SSTR2	TGA	TGAA	0.362995	0	0	0.362995	4.72342e-05	0	0	5.85665e-05	0
ENST00000247207.6	chr14	286	1	2767	1887	376	459	HSPA2	TAA	TAAG	13.7938	13.4308	0	0.362995	0.00498512	0.00711755	0	0.000790839	0.111111
ENST00000438932.2	chr19	914	-1	3335	1104	144	2042	PNMA8A	TGA	TGAG	0.362995	0.362995	0	0	0.000108844	0.0003288	0	0	0
ENST00000542638.5	chr6	507	-1	2875	756	365	1709	ELOVL5	TGA	TGAA	197.469	66.7911	3.62995	125.233	0.068685	0.088348	0.00994507	0.0732787	0.829432
ENST00000258607.10	chr13	173	1	3614	2016	73	1480	CKAP2	TAA	TAAG	856.668	655.569	10.8899	182.587	0.237042	0.325183	0.149176	0.123369	0.379384
ENST00000380701.8	chr9	51	1	6553	3948	365	2195	CCDC171	TGA	TGAC	2.54097	2.17797	0	0.362995	0.000387756	0.000551664	0	0.000165374	0.299772
ENST00000542180.5	chr13	90	-1	2478	2178	150	105	SUPT20H	TGA	TGAG	26.8616	26.8616	0	0	0.01084	0.0123332	0	0	0
ENST00000298351.5	chr14	388	1	5363	2388	167	2763	TMEM63C	TGA	TGAC	4.71894	0	0	4.71894	0.000879906	0	0	0.0017079	0
ENST00000416007.9	chr14	158	-1	1603	1002	43	513	MBIP	TGA	TGAA	9.80087	8.71188	0.362995	0.72599	0.00611408	0.00869449	0.00844175	0.00141519	0.162768
ENST00000245680.7	chr2	578	-1	10314	1539	227	8503	SLC35F5	TAG	TAGC	250.83	39.9295	0.72599	209.448	0.0243193	0.0259451	0.00319819	0.0246323	0.949401
ENST00000441359.1	chr7	569	-1	962	147	238	532	SMIM30	TGA	TGAC	31.5806	7.6229	10.5269	10.8899	0.032828	0.0518564	0.0442305	0.0204696	0.394737
ENST00000264935.6	chr5	6	1	2366	1911	16	394	CEP72	TGA	TGAC	7.2599	6.17092	0	0.362995	0.00306843	0.00322916	0	0.000921307	0.285309
ENST00000265460.9	chr11	502	1	5745	3303	29	2368	MYRF	TGA	TGAG	18.5128	4.35594	0	14.1568	0.00322241	0.00131878	0	0.00597838	4.53326
ENST00000353533.10	chr17	222	1	3778	1167	4	2562	MAP2K4	TGA	TGAT	86.0298	22.8687	0	62.7982	0.0227713	0.0195961	0	0.0245114	1.25083
ENST00000391851.8	chr19	1020	1	1393	1029	123	196	PRMT1	TGA	TGAG	69.6951	64.9761	2.90396	0.362995	0.0500323	0.0631449	0.0236094	0.00185202	0.0293296
ENST00000355346.8	chr2	25	-1	1963	570	204	1144	ITGB1BP1	TGA	TGAA	72.236	58.4422	11.9788	1.08899	0.0367988	0.10253	0.0587198	0.00095191	0.00928419
ENST00000377365.4	chr5	660	-1	5715	1575	1131	2964	INSYN2B	TGA	TGAG	99.0977	25.7727	13.0678	58.8052	0.0173399	0.0163636	0.0115542	0.0198398	1.21244
ENST00000338965.8	chr11	219	1	6438	1332	238	4823	NCR3LG1	TAA	TAAA	177.142	15.9718	0.362995	160.444	0.027515	0.0119908	0.00152519	0.0332664	2.77432
ENST00000641863.1	chr1	995	-1	2367	1347	842	133	SRGAP2B	TAA	TAAA	11.6158	11.2528	0.362995	0	0.00490741	0.00835401	0.000431111	0	0
ENST00000520701.5	chr5	596	1	2005	1398	132	430	SLC36A1	TAG	TAGG	6.53391	3.26696	0	3.26696	0.00325881	0.00233688	0	0.00759757	3.25116
ENST00000362057.4	chr9	430	-1	4070	2691	666	668	WHRN	TAG	TAGA	1.45198	1.45198	0	0	0.000356752	0.000539569	0	0	0
ENST00000308167.9	chrX	580	-1	4165	1959	374	1787	ELF4	TAA	TAAG	31.5806	13.7938	0.72599	17.0608	0.00758237	0.00704125	0.00194115	0.00954716	1.35589
ENST00000264183.9	chr1	1789	-1	6022	3906	454	1617	ARID4B	TGA	TGAC	30.4916	19.2387	0	10.1639	0.00506337	0.00492543	0	0.00628563	1.27616
ENST00000442822.6	chr6	272	-1	1696	1374	187	90	TSBP1	TGA	TGAG	0.362995	0.362995	0	0	0.00021403	0.000264189	0	0	0
ENST00000495461.6	chr3	376	-1	1497	252	65	1135	SELENOK	TAA	TAAA	54.8123	26.8616	5.80792	18.1498	0.0366147	0.106594	0.0893526	0.015991	0.150018
ENST00000253247.9	chr17	861	1	2844	2127	6	666	NOL11	TGA	TGAT	36.2995	31.5806	0	3.99295	0.0127635	0.0148475	0	0.00599541	0.4038
ENST00000265379.10	chr3	650	1	9214	7803	488	878	COL6A5	TGA	TGAA	0.362995	0.362995	0	0	3.9396e-05	4.65199e-05	0	0	0
ENST00000359655.9	chr10	259	1	2477	2328	52	52	SUPV3L1	TAG	TAGT	10.1639	9.80087	0.362995	0	0.0041033	0.00420999	0.00698068	0	0
ENST00000431367.6	chr12	473	1	5021	1725	153	3098	IKZF4	TAG	TAGC	6.53391	2.54097	0	3.99295	0.00130132	0.00147302	0	0.00128888	0.874988
ENST00000589785.1	chr17	627	1	1918	873	158	842	TMUB2	TAA	TAAG	2.17797	0.72599	0.362995	1.08899	0.00113554	0.000831604	0.00229744	0.00129333	1.55523
ENST00000361311.4	chr1	114	-1	4647	2883	245	1474	CLSTN1	TGA	TGAC	34.8475	17.7868	0	17.0608	0.00749893	0.00616953	0	0.0115745	1.87607
ENST00000527348.1	chr11	640	1	670	237	268	120	BANF1	TGA	TGAT	62.0722	35.9365	1.45198	22.5057	0.092645	0.151631	0.00541784	0.187547	1.23687
ENST00000606498.5	chr1	690	-1	969	591	15	318	TM2D1	TAA	TAAA	2.17797	2.17797	0	0	0.00224765	0.00368523	0	0	0
ENST00000405914.1	chr2	93	-1	3180	2349	567	219	KIF3C	TGA	TGAC	17.7868	17.4238	0	0.362995	0.00559332	0.00741752	0	0.00165751	0.223459
ENST00000239165.8	chr17	696	-1	1371	621	96	609	HOXB7	TGA	TGAG	23.9577	9.43787	0.72599	12.3418	0.0174746	0.0151979	0.0075624	0.0202657	1.33346
ENST00000396330.6	chr8	352	-1	3452	1002	501	1904	SNX16	TAA	TAAT	7.6229	3.99295	2.17797	1.45198	0.00220826	0.00398498	0.00434725	0.000762595	0.191367
ENST00000638572.2	chr2	420	-1	4366	1224	79	3018	ST3GAL5	TGA	TGAA	35.9365	21.0537	0	14.5198	0.00823099	0.0172007	0	0.00481107	0.279701
ENST00000368100.1	chr1	1293	-1	1818	1212	130	431	VSIG8	TGA	TGAG	0.362995	0.362995	0	0	0.000199667	0.000299501	0	0	0
ENST00000306121.8	chr1	834	1	1736	1323	5	363	SNX7	TAA	TAAT	21.0537	19.2387	0	1.08899	0.0121277	0.0145418	0	0.00299996	0.2063
ENST00000336596.7	chr3	449	1	5712	2919	122	2626	EPHA3	TAA	TAAA	0.362995	0.362995	0	0	6.35496e-05	0.000124356	0	0	0
ENST00000512701.6	chr9	48	-1	10483	2016	31	8391	TTC39B	TGA	TGAT	7.2599	2.17797	0	5.08193	0.000692541	0.00108034	0	0.000605641	0.560601
ENST00000358208.8	chr20	243	1	3851	1578	181	2047	SRC	TAG	TAGG	1.08899	0	0	0.72599	0.00028278	0	0	0.000354661	0
ENST00000216122.9	chr22	193	1	3458	2172	71	1170	MCM5	TGA	TGAG	12.7048	11.2528	0	1.45198	0.00367404	0.00518087	0	0.00124101	0.239537
ENST00000375650.5	chr6	248	1	2517	1893	207	372	HSPA1B	TAG	TAGG	10.1639	6.17092	1.08899	1.45198	0.00403809	0.00325986	0.0052608	0.00390317	1.19734
ENST00000450879.2	chr14	52	-1	3178	2688	94	351	SALL2	TAG	TAGC	8.34889	5.80792	0	2.54097	0.00262709	0.00216069	0	0.00723922	3.35043
ENST00000456397.7	chr8	205	-1	3239	612	64	2518	TM2D2	TAA	TAAG	19.6017	6.17092	0.362995	13.0678	0.00605179	0.0100832	0.0056718	0.00518976	0.514694
ENST00000260956.9	chr2	747	1	1650	1194	109	302	SSB	TAG	TAGT	128.137	115.432	6.53391	2.17797	0.077659	0.0966771	0.0599441	0.00721182	0.074597
ENST00000543111.5	chr12	347	-1	8200	7014	132	1009	FAM186A	TGA	TGAA	0.72599	0.72599	0	0	8.85354e-05	0.000103506	0	0	0
ENST00000431456.5	chr11	939	-1	1245	834	217	149	PIH1D2	TGA	TGAA	1.08899	1.08899	0	0	0.000874687	0.00130574	0	0	0
ENST00000300291.10	chr16	473	-1	4393	651	124	3573	NUDT21	TGA	TGAA	818.917	135.034	19.6017	651.939	0.186414	0.207426	0.158079	0.182463	0.879653
ENST00000402655.6	chr16	673	1	1594	903	119	527	WWOX	TGA	TGAG	2.54097	0.362995	0	1.81498	0.00159408	0.000401988	0	0.00344398	8.56736
ENST00000615383.5	chr15	10	-1	3744	3042	20	637	TUBGCP5	TAA	TAAA	10.5269	6.53391	0	3.99295	0.00281166	0.0021479	0	0.00626836	2.91837
ENST00000322522.8	chr2	839	1	1919	1167	450	257	INPP1	TAG	TAGA	11.6158	10.1639	0.72599	0	0.00605307	0.00870939	0.00161331	0	0
ENST00000264668.6	chr5	34	1	3274	2145	24	1060	MTRR	TAA	TAAA	50.4563	35.9365	0	13.4308	0.0154112	0.0167536	0	0.0126706	0.756289
ENST00000534025.6	chr11	177	-1	1844	564	123	1112	TMEM9B	TAA	TAAT	34.8475	9.80087	0	23.5947	0.0188978	0.0173774	0	0.0212182	1.22102
ENST00000222800.7	chr7	301	-1	1483	915	64	459	ABHD11	TAA	TAAG	3.26696	1.45198	0	1.81498	0.00220294	0.00158686	0	0.0039542	2.49183
ENST00000398822.7	chr22	66	-1	1487	1050	234	158	MAPK1	TAA	TAAA	51.9083	51.1823	0	0	0.0349081	0.0487451	0	0	0
ENST00000307741.11	chr19	87	1	4761	2037	154	2525	THOP1	TGA	TGAG	1.81498	1.08899	0	0.72599	0.000381217	0.000534603	0	0.000287521	0.537822
ENST00000582401.5	chr1	1012	-1	2926	1143	328	1410	TXNIP	TGA	TGAG	1.08899	0	0	1.08899	0.000372175	0	0	0.00077233	0
ENST00000369534.8	chrX	761	-1	2006	1368	106	487	MPP1	TAA	TAAG	0.362995	0.362995	0	0	0.000180955	0.000265347	0	0	0
ENST00000228740.7	chr12	668	-1	2140	1803	62	230	LTA4H	TAA	TAAA	26.4986	25.0467	1.08899	0	0.0123825	0.0138917	0.0175643	0	0
ENST00000373709.8	chr1	394	1	1900	1335	47	473	SERINC2	TGA	TGAG	6.17092	5.08193	0	1.08899	0.00324785	0.00380669	0	0.00230229	0.604802
ENST00000474759.6	chr3	377	1	3789	3243	156	345	CACNA2D3	TGA	TGAC	0.362995	0.362995	0	0	9.58024e-05	0.000111932	0	0	0
ENST00000344537.9	chr6	70	-1	1403	1023	167	168	DTNBP1	TAA	TAAA	3.26696	2.90396	0	0.362995	0.00232855	0.00283867	0	0.00216069	0.761161
ENST00000261520.9	chr15	241	-1	7206	2916	226	4019	ICE2	TGA	TGAG	93.2897	63.1612	3.62995	24.3207	0.0129461	0.0216602	0.0160617	0.00605142	0.27938
ENST00000569466.1	chr16	370	-1	1417	993	247	132	CD2BP2	TGA	TGAG	5.80792	4.71894	0	0.362995	0.00409875	0.0047522	0	0.00274996	0.578671
ENST00000367833.7	chr1	1386	1	2998	786	110	2057	TIPRL	TAA	TAAA	47.1894	21.7797	4.35594	20.6907	0.0157403	0.0277096	0.0395995	0.0100587	0.363004
ENST00000374169.7	chr9	420	-1	2109	411	83	1570	POLE3	TGA	TGAA	136.849	37.3885	4.35594	91.4748	0.0648882	0.0909696	0.0524812	0.0582642	0.64048
ENST00000587424.2	chr11	864	1	4028	816	24	3143	SRSF8	TAA	TAAG	54.8123	10.1639	0	43.5594	0.0136078	0.0124557	0	0.0138592	1.11268
ENST00000222256.8	chr19	479	-1	1528	630	173	680	RAB3A	TGA	TGAG	1.45198	1.45198	0	0	0.000950249	0.00230473	0	0	0
ENST00000333461.6	chr17	460	-1	3430	1203	437	1745	STAC2	TGA	TGAG	3.26696	1.08899	0.72599	1.45198	0.000952465	0.000905225	0.0016613	0.00083208	0.919198
ENST00000356079.8	chr2	901	1	1949	1356	117	431	CYP20A1	TAA	TAAA	19.6017	17.7868	0	1.81498	0.0100573	0.0131171	0	0.00421108	0.321038
ENST00000329101.8	chr18	237	1	4595	2760	50	1740	NFATC1	TAG	TAGT	7.98589	3.26696	0	4.71894	0.00173795	0.00118368	0	0.00271203	2.29119
ENST00000551404.6	chr12	781	1	1630	1389	102	94	MAPKAPK5	TAA	TAAT	34.4845	32.6696	1.08899	0.362995	0.0211562	0.0235202	0.0106763	0.00386165	0.164184
ENST00000374088.7	chr9	429	-1	5464	4287	211	921	AKNA	TGA	TGAC	4.35594	1.81498	0	2.54097	0.000797207	0.000423367	0	0.00275892	6.51661
ENST00000382374.9	chr13	19	-1	1885	1272	16	552	MICU2	TAA	TAAT	24.3207	19.2387	0	5.08193	0.0129022	0.0151248	0	0.0092064	0.608696
ENST00000532335.5	chr6	834	-1	2099	606	341	1107	RAET1E	TAG	TAGA	8.34889	2.54097	0.72599	4.71894	0.00397755	0.00419301	0.002129	0.00426282	1.01665
ENST00000259239.7	chr2	629	1	1740	843	702	150	IMP4	TGA	TGAG	27.5876	25.0467	0.362995	1.08899	0.015855	0.0297113	0.000517087	0.0072599	0.244348
ENST00000377848.7	chr12	746	1	9247	7344	3	1855	ACACB	TGA	TGAC	11.6158	9.80087	0	1.81498	0.00125617	0.00133454	0	0.000978423	0.733154
ENST00000356994.7	chr8	569	-1	5607	4935	395	232	SCRIB	TAG	TAGA	12.7048	10.1639	0	2.54097	0.00226589	0.00205955	0	0.0109524	5.31789
ENST00000407418.7	chr22	255	-1	6122	1206	118	4753	CBX6	TGA	TGAG	104.18	0.72599	0	103.454	0.0170172	0.000601982	0	0.021766	36.1572
ENST00000403298.8	chr6	394	-1	2162	1398	105	614	TFEB	TGA	TGAC	1.45198	0.72599	0	0.72599	0.000671591	0.000519306	0	0.00118239	2.27687
ENST00000636863.1	chr5	107	-1	1149	303	80	721	TTC33	TAA	TAAG	2.54097	0.72599	1.81498	0	0.00221146	0.00239601	0.0226872	0	0
ENST00000558653.5	chr15	181	1	1131	882	178	26	DTWD1	TAG	TAGT	10.1639	8.71188	1.45198	0	0.00898662	0.00987742	0.00815719	0	0
ENST00000380518.8	chr12	294	-1	5059	4431	149	434	COL2A1	TAA	TAAA	1.08899	1.08899	0	0	0.000215257	0.000245765	0	0	0
ENST00000587489.5	chr17	654	1	2487	2016	84	342	FMNL1	TAG	TAGC	3.62995	2.54097	0	1.08899	0.00145957	0.0012604	0	0.00318417	2.52632
ENST00000295797.5	chr3	821	1	4887	1758	240	2844	PRKCI	TGA	TGAT	95.8307	49.0043	0.362995	45.0114	0.0196093	0.0278751	0.00151248	0.0158268	0.567776
ENST00000258796.12	chr7	29	1	4805	1539	164	3057	TTYH3	TAG	TAGA	120.151	13.4308	0.362995	106.358	0.0250055	0.00872698	0.00221338	0.0347915	3.98666
ENST00000619168.4	chr10	49	1	8153	1125	331	6652	CAMK1D	TGA	TGAC	63.5241	6.89691	0.72599	53.7233	0.00779151	0.00613058	0.00219332	0.00807626	1.31737
ENST00000352957.8	chr21	26	-1	1110	984	36	45	MRPL39	TAA	TAAT	2.90396	2.90396	0	0	0.00261618	0.00295118	0	0	0
ENST00000379084.5	chr9	129	-1	893	462	286	100	FAM219A	TGA	TGAG	1.08899	0.72599	0.362995	0	0.00121947	0.00157141	0.00126921	0	0
ENST00000373365.5	chr6	370	-1	2016	522	85	1364	GLO1	TAG	TAGT	176.416	42.8334	2.17797	127.048	0.0875078	0.0820564	0.0256232	0.0931439	1.13512
ENST00000360359.5	chr6	326	1	6350	3372	142	2791	ANKS1A	TGA	TGAG	25.0467	7.6229	0	17.4238	0.00394436	0.00226065	0	0.00624284	2.76153
ENST00000521059.5	chr8	529	-1	4405	3126	176	1058	PTK2	TGA	TGAG	305.279	237.399	3.62995	58.4422	0.0693028	0.0759433	0.0206247	0.0552384	0.727363
ENST00000373150.8	chr1	460	1	3238	2394	214	585	MAP7D1	TAA	TAAG	24.3207	13.7938	0	10.5269	0.00751102	0.00576183	0	0.0179946	3.12308
ENST00000426086.2	chr11	569	1	979	534	8	392	VEGFB	TGA	TGAC	38.4775	19.9647	0	17.0608	0.0393028	0.0373871	0	0.0435224	1.1641
ENST00000268679.8	chr16	740	-1	4477	1929	391	2112	CBFA2T3	TGA	TGAC	0.72599	0	0	0.72599	0.00016216	0	0	0.000343745	0
ENST00000524567.1	chr11	1113	1	1639	795	275	524	TMEM45B	TGA	TGAG	0.362995	0.362995	0	0	0.000221474	0.000456598	0	0	0
ENST00000268459.6	chr16	452	1	17039	1380	152	15462	NKD1	TAG	TAGA	2.17797	0.362995	0	1.81498	0.000127823	0.00026304	0	0.000117383	0.446255
ENST00000224807.9	chr10	491	1	3089	945	450	1649	SFXN3	TGA	TGAG	29.4026	5.44493	0.72599	22.8687	0.00951849	0.00576183	0.00161331	0.0138682	2.40691
ENST00000367182.8	chr1	1590	1	10050	1440	133	8432	MDM4	TAA	TAAT	129.589	17.4238	1.45198	110.714	0.0128945	0.0120998	0.0109171	0.0131302	1.08515
ENST00000157600.8	chr3	14	1	8284	1065	110	7064	LMCD1	TGA	TGAA	2.90396	1.08899	0	1.08899	0.000350551	0.00102252	0	0.00015416	0.150764
ENST00000359467.8	chr10	148	-1	5982	2304	135	3498	ZNF33B	TGA	TGAA	59.5312	25.7727	2.17797	31.2176	0.00995172	0.011186	0.0161331	0.00892441	0.797816
ENST00000361923.2	chr1	98	1	6203	3573	169	2416	PER3	TGA	TGAG	6.89691	6.53391	0	0.362995	0.00111187	0.00182869	0	0.000150246	0.0821606
ENST00000267229.11	chr13	208	-1	3624	2910	8	661	RBM26	TGA	TGAT	49.3673	44.6484	0	4.35594	0.0136223	0.0153431	0	0.00658993	0.429504
ENST00000510370.5	chr4	659	-1	794	504	224	21	DCTD	TGA	TGAG	21.7797	17.0608	1.45198	0	0.0274304	0.0338507	0.00648206	0	0
ENST00000407501.6	chr18	17	1	1585	786	351	403	TGIF1	TAA	TAAC	13.0678	9.43787	0.72599	2.90396	0.00824468	0.0120075	0.00206835	0.00720586	0.600115
ENST00000417647.7	chr5	491	1	1905	1641	74	145	IK	TAA	TAAT	67.1541	60.2572	4.71894	0	0.0352515	0.0367198	0.0637694	0	0
ENST00000457749.7	chr19	1109	-1	4558	2124	115	2274	ZNF28	TGA	TGAA	26.4986	11.6158	0.362995	14.5198	0.00581366	0.00546885	0.00315648	0.00638514	1.16755
ENST00000254488.7	chr3	46	1	4249	1866	32	2306	SLC6A11	TGA	TGAG	0.362995	0	0	0.362995	8.54307e-05	0	0	0.000157413	0
ENST00000608933.6	chr4	378	-1	6309	1086	209	4969	PPM1K	TGA	TGAT	38.1145	6.89691	0.362995	30.8546	0.00604129	0.00635074	0.00173682	0.00620942	0.977746
ENST00000614711.4	chr11	1009	-1	3057	2001	94	917	HYOU1	TGA	TGAG	42.8334	18.5128	0.362995	22.8687	0.0140116	0.00925175	0.00386165	0.0249386	2.69555
ENST00000339364.10	chr10	438	-1	4800	2385	114	2256	PIK3AP1	TGA	TGAT	2.54097	0.72599	0	1.81498	0.000529368	0.000304398	0	0.00080451	2.64295
ENST00000270645.8	chr19	1012	1	1469	954	56	414	RCN3	TGA	TGAG	0.362995	0.362995	0	0	0.000247104	0.000380498	0	0	0
ENST00000299641.8	chr10	313	-1	3535	2619	337	534	NDST2	TGA	TGAT	6.89691	5.44493	0.362995	1.08899	0.00195103	0.00207901	0.00107714	0.0020393	0.980899
ENST00000367034.5	chr6	879	1	970	510	115	300	MRPL18	TAA	TAAA	34.4845	23.5947	1.08899	9.43787	0.0355511	0.0462641	0.00946944	0.0314596	0.68
ENST00000292330.3	chr7	467	-1	963	729	117	72	PPP1R35	TAG	TAGA	2.17797	2.17797	0	0	0.00226165	0.00298761	0	0	0
ENST00000394231.8	chr17	470	-1	1397	315	31	1006	MIEN1	TGA	TGAC	5.80792	2.54097	0	2.54097	0.00415742	0.00806656	0	0.00252581	0.313121
ENST00000379108.1	chr13	127	-1	1865	747	144	929	KCTD4	TAA	TAAT	1.08899	1.08899	0	0	0.000583906	0.00145781	0	0	0
ENST00000373051.6	chr6	393	1	1622	708	211	658	MDFI	TGA	TGAG	5.80792	4.71894	0	0.72599	0.00358072	0.00666516	0	0.00110333	0.165537
ENST00000372452.5	chr6	435	1	2665	1611	317	692	TJAP1	TAG	TAGG	5.80792	2.54097	1.08899	1.81498	0.00217933	0.00157726	0.00343529	0.0026228	1.66288
ENST00000471675.1	chr3	549	-1	712	156	89	422	B4GALT4	TGA	TGAG	4.71894	1.81498	0.362995	1.81498	0.00662772	0.0116345	0.0040786	0.00430089	0.369668
ENST00000344275.11	chr12	883	-1	2394	2013	255	81	ABCB9	TGA	TGAA	0.362995	0.362995	0	0	0.000151627	0.000180325	0	0	0
ENST00000310776.8	chr3	698	1	1120	1050	2	23	MRPS22	TAA	TAAA	17.7868	17.0608	0	0	0.015881	0.0162484	0	0	0
ENST00000501704.3	chr13	123	-1	4026	1680	485	1816	TSC22D1	TAG	TAGT	19.2387	14.1568	0.362995	4.35594	0.00477862	0.00842667	0.000748444	0.00239865	0.284649
ENST00000309415.7	chr2	539	1	5803	2616	187	2955	SH3RF3	TGA	TGAG	33.3956	5.80792	0	27.5876	0.00575488	0.00222015	0	0.00933592	4.20508
ENST00000252542.9	chr19	155	-1	3167	2829	55	238	SAFB2	TAA	TAAG	6.53391	6.17092	0	0.362995	0.00206312	0.00218131	0	0.00152519	0.699209
ENST00000263256.7	chr22	292	-1	3780	474	198	3063	DESI1	TAA	TAAC	49.0043	7.98589	0	41.0184	0.0129641	0.0168479	0	0.0133916	0.794854
ENST00000571750.5	chr16	647	-1	3033	2292	203	493	RFWD3	TGA	TGAC	119.788	78.7699	3.99295	31.9436	0.039495	0.0343673	0.0196697	0.0647943	1.88534
ENST00000621161.5	chr17	361	1	8571	1881	172	6473	RAB11FIP4	TAA	TAAG	55.5383	8.71188	0	46.8264	0.00647979	0.00463152	0	0.00723411	1.56193
ENST00000265529.7	chr3	244	-1	3311	2340	675	251	KIF9	TAG	TAGA	7.6229	5.08193	2.17797	0.362995	0.00230229	0.00217177	0.00322662	0.0014462	0.665908
ENST00000435224.3	chr11	295	-1	4905	3045	421	1394	ABTB2	TGA	TGAG	2.17797	1.08899	0	1.08899	0.000444031	0.000357631	0	0.000781195	2.18436
ENST00000256969.7	chr12	205	1	2280	318	171	1746	SPX	TGA	TGAA	1.45198	0.72599	0	0.72599	0.000636834	0.00228299	0	0.000415802	0.182131
ENST00000374619.1	chr1	275	-1	2835	1101	504	1185	HTR1D	TAG	TAGT	2.17797	0.72599	0.362995	1.08899	0.000768244	0.000659392	0.000720228	0.000918975	1.39367
ENST00000290583.8	chr1	1092	-1	3246	1365	788	1048	CELF3	TGA	TGAG	0.362995	0.362995	0	0	0.000111828	0.00026593	0	0	0
ENST00000375630.6	chr13	276	1	8768	3543	82	5098	ATP11A	TGA	TGAT	39.2035	10.5269	0.362995	27.9506	0.0044712	0.00297117	0.00442677	0.00548266	1.84529
ENST00000393611.6	chr5	716	-1	1236	579	326	286	RAB24	TGA	TGAG	1.45198	0.72599	0	0.72599	0.00117474	0.00125387	0	0.00253843	2.02448
ENST00000382668.7	chr16	71	1	1845	648	257	895	FAHD1	TGA	TGAA	2.17797	2.17797	0	0	0.00118047	0.00336107	0	0	0
ENST00000229633.7	chr6	733	1	3325	516	202	2562	HINT3	TGA	TGAA	25.0467	5.44493	0.72599	18.1498	0.00753283	0.0105522	0.00359401	0.00708421	0.671351
ENST00000304129.9	chr10	577	-1	3722	2424	41	1212	AFAP1L2	TAG	TAGA	14.5198	6.17092	0	8.34889	0.00390108	0.00254576	0	0.00688852	2.70588
ENST00000397609.6	chr15	62	1	4388	1269	29	3045	FAM98B	TAA	TAAA	50.8193	11.6158	0.72599	37.7515	0.0115814	0.00915354	0.0250341	0.0123979	1.35443
ENST00000355653.8	chr17	602	-1	2699	1149	57	1448	VAT1	TAG	TAGG	44.2854	9.07488	0	34.4845	0.0164081	0.00789807	0	0.0238153	3.01533
ENST00000444610.7	chr13	166	-1	1199	921	47	186	DHRS12	TAG	TAGG	2.17797	1.81498	0	0	0.00181649	0.00197066	0	0	0
ENST00000304177.10	chr15	434	-1	11274	429	26	10774	C15orf40	TAA	TAAA	11.9788	3.26696	0	7.6229	0.00106252	0.00761528	0	0.000707527	0.0929089
ENST00000368216.9	chr1	1246	1	2271	1395	630	201	RRNAD1	TGA	TGAT	5.08193	4.35594	0.72599	0	0.00223775	0.00312254	0.00115237	0	0
ENST00000613549.3	chr17	1	-1	6062	1206	165	4646	DOC2B	TGA	TGAC	0.72599	0.72599	0	0	0.000119761	0.000601982	0	0	0
ENST00000245564.6	chr1	1210	1	2431	1680	18	688	MSTO1	TAA	TAAA	5.08193	3.26696	0	1.81498	0.00209047	0.00194462	0	0.00263805	1.35659
ENST00000330029.6	chr22	143	1	916	159	24	688	UQCR10	TAG	TAGT	35.5735	15.2458	1.45198	11.9788	0.0388357	0.0958855	0.0604992	0.0174111	0.181582
ENST00000409116.5	chr2	318	1	1339	444	20	830	SNRNP27	TAA	TAAC	28.3136	18.1498	1.45198	7.98589	0.0211453	0.0408778	0.072599	0.00962156	0.235373
ENST00000301464.4	chr12	403	1	947	690	45	167	IGFBP6	TAA	TAAA	0.72599	0.72599	0	0	0.000766621	0.00105216	0	0	0
ENST00000358389.7	chr19	1137	1	4118	2229	1577	267	CNOT3	TGA	TGAC	13.7938	13.7938	0	0	0.00334964	0.00618834	0	0	0
ENST00000381937.9	chr5	92	-1	4011	1296	121	2549	NADK2	TGA	TGAA	31.5806	13.7938	0	17.7868	0.00787349	0.0106434	0	0.00697794	0.655613
ENST00000399300.6	chr8	384	-1	7269	2973	208	4043	RBM12B	TAG	TAGA	62.4352	25.0467	0.362995	37.0255	0.00858924	0.00842471	0.00174517	0.00915793	1.08703
ENST00000371754.8	chr20	352	-1	5235	3780	448	962	ZNFX1	TAA	TAAG	12.7048	11.9788	0.72599	0	0.0024269	0.003169	0.00162051	0	0
ENST00000288319.12	chr21	126	-1	4904	1407	91	3361	ERG	TAA	TAAA	0.72599	0	0	0.72599	0.00014804	0	0	0.000216004	0
ENST00000228799.7	chr12	18	1	2320	1311	87	877	ITFG2	TAG	TAGC	5.44493	2.54097	0	2.90396	0.00234695	0.00193819	0	0.00331124	1.70842
ENST00000636427.2	chr13	293	-1	3789	606	76	3062	C13orf46	TAG	TAGC	2.17797	1.08899	0	1.08899	0.000574814	0.00179701	0	0.000355645	0.19791
ENST00000476627.5	chr7	790	-1	882	708	82	47	TMUB1	TAG	TAGT	3.26696	2.90396	0	0	0.00370403	0.00410164	0	0	0
ENST00000264020.6	chr11	996	-1	1819	1035	372	367	IFT46	TGA	TGAG	5.80792	4.71894	0.72599	0.362995	0.00319292	0.00455936	0.00195159	0.000989088	0.216936
ENST00000325599.13	chr3	432	-1	2846	1701	99	1001	SHQ1	TGA	TGAC	20.3277	13.4308	0	6.53391	0.00714256	0.00789584	0	0.00652738	0.826687
ENST00000370321.8	chr1	815	1	1028	861	69	53	RPL5	TAA	TAAA	964.478	856.305	79.4959	0	0.938208	0.994548	1.15211	0	0
ENST00000262320.8	chr16	13	-1	3707	2556	430	676	AXIN1	TGA	TGAT	17.0608	11.9788	0.362995	4.71894	0.00460231	0.00468656	0.000844175	0.00698068	1.48951
ENST00000328827.9	chr12	615	-1	8991	990	234	7722	PAWR	TAG	TAGA	241.392	47.9154	0.72599	190.935	0.0268482	0.0483993	0.00310252	0.0247262	0.510878
ENST00000638035.1	chr10	40	1	1849	1440	345	19	CELF2	TGA	TGAT	5.08193	4.35594	0	0	0.00274848	0.00302496	0	0	0
ENST00000536525.6	chr12	613	1	7386	7059	167	115	NAV3	TAG	TAGA	169.882	163.711	1.45198	3.99295	0.0230005	0.0231918	0.00869449	0.0347213	1.49714
ENST00000650790.1	chr12	554	1	3006	2157	136	668	TBK1	TAG	TAGC	20.6907	14.8828	0	5.80792	0.00688314	0.00689977	0	0.00869449	1.26011
ENST00000336032.3	chr6	602	1	2065	951	111	958	PNRC1	TAG	TAGA	13.0678	9.43787	0.362995	2.54097	0.00632824	0.00992416	0.00327023	0.00265237	0.267264
ENST00000618403.5	chr17	423	1	1515	750	125	595	DHRS11	TAG	TAGT	4.35594	2.90396	0	1.45198	0.00287521	0.00387195	0	0.0024403	0.630252
ENST00000445930.7	chr14	217	1	2163	1137	14	967	PSMC6	TAA	TAAT	43.5594	40.6555	0.362995	1.08899	0.0201384	0.0357568	0.0259282	0.00112615	0.0314947
ENST00000540689.6	chr19	395	1	3595	879	117	2554	ZNF333	TAA	TAAT	2.17797	2.17797	0	0	0.000605833	0.00247778	0	0	0
ENST00000265983.8	chr11	134	-1	1575	1356	18	156	HPX	TGA	TGAG	0.72599	0.72599	0	0	0.000460946	0.000535391	0	0	0
ENST00000314103.6	chr21	115	1	4466	1647	131	2643	CHAF1B	TGA	TGAT	7.6229	3.26696	0.362995	3.62995	0.00170687	0.00198358	0.00277096	0.00137342	0.692395
ENST00000370812.8	chr1	748	-1	4601	1155	22	3379	PIGK	TAG	TAGA	49.7303	20.6907	0	28.6766	0.0108086	0.017914	0	0.00848672	0.473747
ENST00000652226.1	chr5	36	-1	6362	3192	878	2247	SEMA5A	TAA	TAAC	14.5198	4.35594	0	9.43787	0.00228227	0.00136464	0	0.00420021	3.07788
ENST00000222212.6	chr19	1128	1	1016	795	89	87	CACNG7	TGA	TGAG	0.362995	0.362995	0	0	0.000357279	0.000456598	0	0	0
ENST00000337537.8	chr14	277	-1	6655	1371	600	4639	PPP2R5E	TAA	TAAC	164.8	53.7233	0.72599	109.625	0.0247633	0.0391855	0.00120998	0.0236311	0.603057
ENST00000394593.7	chr1	800	1	3345	2544	406	350	LRRC8D	TAA	TAAA	48.6413	44.2854	0.72599	2.90396	0.0145415	0.0174078	0.00178815	0.00829703	0.476628
ENST00000258398.8	chr2	980	1	4730	3567	97	1021	TTLL4	TAA	TAAC	23.2317	19.6017	0	2.90396	0.00491156	0.0054953	0	0.00284423	0.517575
ENST00000232744.13	chr3	624	1	1962	1404	68	445	ABTB1	TGA	TGAG	1.45198	0.72599	0	0.72599	0.000740051	0.000517087	0	0.00163144	3.15506
ENST00000529689.5	chr11	815	-1	4014	732	429	2808	CCDC90B	TAG	TAGT	44.6484	27.9506	4.35594	9.07488	0.0111232	0.0381839	0.0101537	0.00323179	0.0846376
ENST00000252809.3	chr19	485	1	1200	894	26	235	GDF15	TGA	TGAG	0.362995	0.362995	0	0	0.000302496	0.000406035	0	0	0
ENST00000311181.5	chr11	654	-1	2007	1215	78	669	B4GAT1	TGA	TGAG	15.6088	4.71894	0	10.1639	0.00777717	0.0038839	0	0.0151926	3.91169
ENST00000316218.12	chr3	591	1	1844	1527	134	138	PDIA5	TAA	TAAT	8.34889	7.6229	0.362995	0	0.0045276	0.00499207	0.00270892	0	0
ENST00000464668.5	chr3	694	1	641	507	71	18	FAIM	TAA	TAAT	10.8899	10.5269	0	0	0.0169889	0.020763	0	0	0
ENST00000377967.8	chrX	163	1	5438	4173	35	1185	KDM6A	TGA	TGAT	13.4308	11.2528	0	2.17797	0.00246981	0.00269658	0	0.00183795	0.681584
ENST00000538954.5	chr9	453	-1	1257	474	111	627	STOM	TGA	TGAG	20.6907	8.34889	0	11.2528	0.0164604	0.0176137	0	0.0179471	1.01893
ENST00000321030.9	chr19	1136	1	1833	1467	46	275	PRPF31	TGA	TGAA	25.7727	19.9647	0.72599	3.99295	0.0140604	0.0136092	0.0157824	0.0145198	1.06691
ENST00000321545.5	chr19	1231	1	3690	1770	376	1499	ZNF543	TGA	TGAA	4.71894	2.54097	0.362995	1.81498	0.00127884	0.00143557	0.000965413	0.00121079	0.843419
ENST00000637441.1	chr7	346	-1	5822	3588	161	2028	MAGI2	TAA	TAAA	1.08899	0	0	1.08899	0.000187047	0	0	0.000536975	0
ENST00000409502.7	chr3	348	1	1790	711	257	777	PPM1M	TGA	TGAG	3.62995	0.72599	0	2.54097	0.00202791	0.00102108	0	0.00327023	3.2027
ENST00000377615.7	chr13	196	-1	1793	225	159	1364	COMMD6	TGA	TGAA	25.0467	14.5198	5.80792	0.362995	0.0139691	0.0645325	0.0365278	0.000266125	0.0041239
ENST00000216468.8	chr14	393	-1	7761	945	35	6736	TMED8	TGA	TGAA	113.254	3.62995	0	109.262	0.0145928	0.00384122	0	0.0162205	4.22276
ENST00000217381.2	chr20	188	-1	2342	1485	266	546	SNTA1	TAG	TAGA	7.98589	3.26696	0	4.71894	0.00340986	0.00219997	0	0.00864274	3.92857
ENST00000374867.7	chr10	135	-1	5640	2739	279	2577	NRP1	TGA	TGAA	227.235	81.6739	2.90396	140.842	0.0402899	0.0298189	0.0104085	0.0546535	1.83285
ENST00000354340.8	chr19	852	-1	3654	2691	46	872	ZNF112	TGA	TGAA	2.54097	2.54097	0	0	0.000695393	0.000944246	0	0	0
ENST00000379019.5	chr20	69	-1	5489	1986	207	3251	GPCPD1	TAG	TAGT	17.4238	8.71188	0	8.71188	0.00317431	0.00438665	0	0.00267975	0.610889
ENST00000311946.7	chr5	625	1	3274	1368	110	1751	NIPAL4	TGA	TGAA	0.72599	0.362995	0	0.362995	0.000221744	0.000265347	0	0.000207307	0.781268
ENST00000394485.5	chr16	486	1	404	153	65	141	MT1X	TGA	TGAT	17.7868	8.71188	5.44493	0.72599	0.0440266	0.0569404	0.0837681	0.00514887	0.0904255
ENST00000266659.8	chr12	604	1	5812	768	120	4879	GLIPR1	TAA	TAAT	5.08193	1.45198	0	3.62995	0.000874386	0.0018906	0	0.000743995	0.393523
ENST00000260102.8	chr8	257	1	1147	858	68	176	MRPL15	TGA	TGAA	42.8334	39.5665	0	1.08899	0.0373439	0.0461148	0	0.00618742	0.134174
ENST00000357214.6	chr1	445	-1	3740	2091	90	1514	SFPQ	TAG	TAGA	230.139	170.245	0.362995	57.7162	0.0615345	0.0814178	0.00403328	0.0381217	0.468223
ENST00000394725.3	chr16	442	-1	2110	816	206	1043	SIAH1	TGA	TGAA	28.3136	17.7868	0.362995	9.43787	0.0134188	0.0217975	0.00176211	0.00904878	0.415129
ENST00000257857.8	chr12	461	-1	1070	684	273	68	CD63	TAG	TAGG	35.9365	33.0326	1.45198	0	0.0335855	0.0482932	0.00531861	0	0
ENST00000283875.6	chr3	566	1	3000	1287	75	1593	GTF2E1	TGA	TGAG	22.5057	10.5269	1.08899	10.5269	0.0075019	0.00817938	0.0145198	0.0066082	0.80791
ENST00000254528.4	chr18	12	1	5944	3129	177	2593	EMILIN2	TAA	TAAG	3.99295	1.81498	0	2.17797	0.000671761	0.00058005	0	0.000839942	1.44805
ENST00000333891.14	chr7	352	-1	20284	15396	286	4557	PCLO	TGA	TGAA	219.612	214.53	0	5.08193	0.0108269	0.0139341	0	0.00111519	0.0800331
ENST00000328654.10	chr12	939	1	17697	1569	468	15615	ZNF26	TGA	TGAG	17.0608	11.9788	0	5.08193	0.000964049	0.0076347	0	0.000325452	0.042628
ENST00000229266.8	chr12	692	1	1572	1188	216	123	CHPT1	TGA	TGAA	14.5198	14.1568	0	0	0.00923652	0.0119165	0	0	0
ENST00000275767.3	chr7	666	1	1997	525	217	1210	TMEM140	TAA	TAAA	0.362995	0.362995	0	0	0.00018177	0.000691419	0	0	0
ENST00000546561.2	chr12	590	-1	1168	681	215	227	TSPAN8	TGA	TGAA	6.89691	3.26696	1.81498	0.72599	0.00590489	0.00479729	0.00844175	0.00319819	0.666667
ENST00000374176.8	chr10	191	1	5628	1251	7	4325	MAPK8	TGA	TGAC	51.9083	21.4167	0	30.4916	0.00922322	0.0171197	0	0.00705008	0.411812
ENST00000341162.8	chr14	364	1	4341	564	48	3684	FCF1	TAA	TAAT	75.14	27.9506	2.90396	40.6555	0.0173094	0.0495578	0.0604992	0.0110357	0.222683
ENST00000376829.6	chr13	222	-1	3738	2571	846	276	DZIP1	TAA	TAAT	83.1259	74.051	3.62995	4.71894	0.0222381	0.0288024	0.00429072	0.0170976	0.593617
ENST00000612402.4	chr5	331	1	6592	2823	111	3613	WDR36	TAA	TAAA	85.6668	32.3066	0	53.3603	0.0129956	0.0114441	0	0.014769	1.29054
ENST00000171887.8	chr2	960	-1	10331	5175	447	4664	TNS1	TGA	TGAA	0.72599	0	0	0.72599	7.0273e-05	0	0	0.000155658	0
ENST00000262854.11	chrX	267	-1	14731	13092	387	1207	HUWE1	TAA	TAAT	302.012	284.588	1.81498	14.1568	0.0205018	0.0217376	0.00468986	0.0117289	0.539569
ENST00000531380.2	chr11	829	-1	7387	1581	304	5457	FZD4	TAA	TAAG	48.6413	1.81498	0	46.8264	0.00658472	0.00114799	0	0.00858097	7.47477
ENST00000373610.8	chr1	405	1	4865	1608	128	3084	TXLNA	TAG	TAGA	45.0114	9.07488	0.362995	35.5735	0.00925209	0.00564358	0.0028359	0.0115349	2.04389
ENST00000395384.9	chr16	343	1	2200	861	12	1282	QPRT	TAG	TAGT	3.99295	0.362995	0	3.62995	0.00181498	0.000421597	0	0.00283148	6.71607
ENST00000356362.6	chr7	535	-1	3480	1953	209	1273	PUS7	TGA	TGAG	48.6413	33.7585	0	14.8828	0.0139774	0.0172855	0	0.0116911	0.676355
ENST00000305454.8	chr8	295	1	3155	591	77	2442	VXN	TAA	TAAA	1.45198	0.362995	0	1.08899	0.000460216	0.000614205	0	0.00044594	0.726044
ENST00000230461.11	chr6	555	-1	4418	1053	148	3172	TMEM30A	TAA	TAAT	207.27	47.5524	1.81498	154.999	0.0469149	0.0451589	0.0122633	0.0488647	1.08206
ENST00000261234.10	chr12	549	1	1918	1299	152	422	RXYLT1	TAA	TAAT	7.2599	7.2599	0	0	0.00378514	0.00558884	0	0	0
ENST00000216281.12	chr14	502	-1	3379	2166	200	968	HSP90AA1	TAA	TAAT	748.496	511.46	10.1639	210.174	0.221514	0.236131	0.0508193	0.217122	0.919498
ENST00000221665.5	chr19	1197	-1	2645	1458	74	1068	FIZ1	TGA	TGAC	3.99295	0.72599	0	3.26696	0.00150962	0.000497936	0	0.00305895	6.14326
ENST00000294304.12	chr11	703	1	5177	4815	118	199	LRP5	TGA	TGAC	69.3321	68.9691	0	0.362995	0.0133923	0.0143238	0	0.0018241	0.127347
ENST00000555206.5	chr9	409	-1	2451	1863	65	478	ZFP37	TGA	TGAA	3.62995	2.54097	0	1.08899	0.00148101	0.00136391	0	0.00227821	1.67035
ENST00000409327.1	chr2	608	-1	2092	1086	106	855	CYP27C1	TAA	TAAG	4.35594	2.90396	0.362995	1.08899	0.00208219	0.002674	0.00342448	0.00127367	0.476316
ENST00000409674.5	chr2	693	1	2397	2151	67	134	GPD2	TGA	TGAG	61.3462	57.3532	0	3.62995	0.0255929	0.0266635	0	0.0270892	1.01596
ENST00000265245.10	chr3	939	-1	3283	1944	23	1271	LSG1	TGA	TGAG	26.8616	15.2458	0	11.6158	0.00818204	0.00784249	0	0.00913914	1.16534
ENST00000547242.5	chr12	725	1	811	318	404	44	TMEM263	TGA	TGAA	17.7868	13.0678	3.26696	1.08899	0.0219319	0.0410938	0.00808652	0.0247497	0.602273
ENST00000228850.6	chr12	36	-1	3334	2529	545	215	AKAP3	TAA	TAAT	0.72599	0.72599	0	0	0.000217754	0.000287066	0	0	0
ENST00000454366.2	chr22	346	1	2983	2187	77	674	GTSE1	TAA	TAAG	50.4563	36.6625	0	13.4308	0.0169146	0.0167638	0	0.019927	1.18869
ENST00000336294.10	chr1	403	1	1778	1446	103	184	TMEM39B	TGA	TGAG	5.80792	5.08193	0	0.362995	0.00326655	0.00351448	0	0.0019728	0.561335
ENST00000372244.3	chr1	563	-1	1472	204	80	1143	TMEM53	TAG	TAGC	2.17797	0	0	1.45198	0.0014796	0	0	0.00127032	0
ENST00000343307.5	chr13	69	1	4215	1464	104	2602	B3GLCT	TAA	TAAA	21.7797	13.4308	0	7.2599	0.00516719	0.00917406	0	0.00279012	0.304132
ENST00000373284.10	chr9	505	-1	1500	933	18	504	TOR2A	TGA	TGAC	1.81498	0	0	1.81498	0.00120998	0	0	0.00360114	0
ENST00000371666.8	chrX	522	1	3996	1251	27	2673	IL13RA1	TGA	TGAT	62.0722	18.5128	0	42.1074	0.0155336	0.0147984	0	0.0157529	1.0645
ENST00000304385.8	chr4	573	-1	10534	519	58	9912	TMEM154	TAA	TAAA	43.5594	1.81498	0	41.7444	0.00413513	0.00349706	0	0.00421151	1.2043
ENST00000640768.1	chrX	293	-1	1722	360	207	1110	SPIN3	TAA	TAAT	2.54097	0.362995	0	2.17797	0.00147559	0.00100832	0	0.00196214	1.94595
ENST00000336292.10	chr15	503	1	7394	4665	159	2525	SYNM	TAA	TAAT	49.0043	13.0678	0	35.9365	0.00662758	0.00280125	0	0.0142323	5.08069
ENST00000393545.9	chr14	414	1	2000	1767	156	32	SPATA7	TAA	TAAT	3.99295	3.62995	0	0	0.00199647	0.0020543	0	0	0
ENST00000503974.5	chr4	394	1	2081	1419	97	520	PDLIM5	TAA	TAAT	241.755	179.32	7.2599	50.4563	0.116172	0.12637	0.0748444	0.0970314	0.767833
ENST00000335867.4	chr14	252	1	2571	2478	18	30	DACT1	TGA	TGAG	1.08899	1.08899	0	0	0.000423565	0.000439461	0	0	0
ENST00000235345.6	chr1	716	-1	6193	1035	129	4984	SLC35D1	TGA	TGAC	49.0043	4.35594	0	44.6484	0.00791286	0.00420864	0	0.00895835	2.12856
ENST00000436108.6	chr11	40	-1	1477	1149	198	85	CHID1	TAG	TAGG	10.1639	7.98589	2.17797	0	0.00688142	0.0069503	0.0109999	0	0
ENST00000589880.1	chr19	56	-1	504	138	21	300	UQCR11	TAA	TAAT	38.1145	19.6017	0.72599	6.53391	0.075624	0.142042	0.034571	0.0217797	0.153333
ENST00000372441.1	chr6	436	-1	2121	918	895	263	LRRC73	TGA	TGAC	0.362995	0.362995	0	0	0.000171143	0.00039542	0	0	0
ENST00000257934.8	chr12	411	1	6623	6330	85	163	ESPL1	TAA	TAAC	6.89691	5.44493	0	0.72599	0.00104136	0.000860178	0	0.00445393	5.17791
ENST00000261881.9	chr15	289	-1	1728	873	49	761	TIPIN	TAA	TAAG	25.0467	16.3348	2.54097	4.35594	0.0144946	0.0187111	0.0518564	0.00572397	0.305913
ENST00000646527.1	chr1	1396	-1	3590	1461	172	1912	SLC19A2	TAA	TAAT	29.0396	7.6229	0	20.6907	0.00808903	0.00521759	0	0.0108215	2.07404
ENST00000258960.7	chr17	649	1	4881	1458	7	3371	NMT1	TAA	TAAC	89.2968	30.1286	0	58.0792	0.0182948	0.0206643	0	0.0172291	0.833759
ENST00000222725.10	chr7	26	1	2445	1107	82	1211	LFNG	TAG	TAGT	10.5269	0.72599	0	9.80087	0.00430546	0.000655818	0	0.0080932	12.3406
ENST00000225655.5	chr17	86	-1	1291	390	614	242	PFN1	TGA	TGAC	202.551	156.088	10.8899	19.2387	0.156895	0.400225	0.0177359	0.0794989	0.198635
ENST00000564675.5	chr15	373	-1	1682	1050	357	230	SNUPN	TAA	TAAA	25.7727	21.4167	0.72599	2.17797	0.0153226	0.0203969	0.00203359	0.00946944	0.464259
ENST00000374704.8	chr10	139	1	5068	993	539	3491	CCNY	TAA	TAAC	174.238	84.2149	2.54097	84.9409	0.03438	0.0848085	0.00471422	0.0243314	0.286898
ENST00000413366.8	chr17	854	1	8964	1986	233	6700	PRKCA	TGA	TGAA	405.829	35.5735	0	369.166	0.0452732	0.0179121	0	0.0550994	3.07609
ENST00000380420.10	chrX	62	-1	1274	840	190	199	PIR	TAG	TAGT	5.08193	3.62995	1.08899	0	0.00398896	0.00432137	0.0057315	0	0
ENST00000314228.9	chr19	825	1	1298	705	506	42	ZNF575	TGA	TGAG	0.362995	0	0.362995	0	0.000279657	0	0.000717382	0	0
ENST00000311437.11	chr19	333	-1	6108	1557	127	4379	ZNF490	TAA	TAAG	16.6978	2.54097	0.362995	13.7938	0.00273375	0.00163196	0.00285823	0.00314999	1.93019
ENST00000382723.5	chr4	57	1	1940	879	229	787	MSX1	TAG	TAGA	55.1753	8.34889	0	45.0114	0.0284409	0.00949817	0	0.0571936	6.02155
ENST00000264093.9	chr2	360	1	1075	801	25	204	DGUOK	TAA	TAAC	34.1215	23.5947	0.72599	6.17092	0.031741	0.0294565	0.0290396	0.0302496	1.02692
ENST00000367846.8	chr1	1383	-1	2177	351	193	1588	MPC2	TAA	TAAA	19.9647	11.6158	3.26696	3.26696	0.00917075	0.0330936	0.0169272	0.00205728	0.0621655
ENST00000156109.7	chrX	216	-1	1658	1398	7	208	GPKOW	TGA	TGAC	2.90396	2.90396	0	0	0.00175148	0.00207723	0	0	0
ENST00000256031.8	chr3	937	-1	7322	3648	396	3233	ATP13A3	TAG	TAGC	664.281	396.754	3.62995	251.556	0.090724	0.108759	0.00916654	0.0778087	0.715422
ENST00000303775.10	chr21	34	-1	4861	612	16	4188	N6AMT1	TAG	TAGC	7.2599	0.72599	0	6.53391	0.0014935	0.00118626	0	0.00156015	1.31519
ENST00000409668.1	chr2	414	-1	1776	783	462	486	TMEM150A	TAA	TAAG	1.08899	0.362995	0	0.72599	0.000613167	0.000463595	0	0.00149381	3.22222
ENST00000449187.6	chr7	625	1	2438	915	75	1403	CALU	TGA	TGAG	353.194	91.1118	7.98589	250.104	0.14487	0.0995757	0.106479	0.178263	1.79023
ENST00000376215.10	chr10	110	1	1584	1215	5	319	PDSS1	TGA	TGAC	21.7797	19.6017	0	1.81498	0.0137498	0.0161331	0	0.00568958	0.352665
ENST00000467148.1	chr20	454	-1	8064	7917	64	38	HELZ2	TGA	TGAA	0.72599	0.72599	0	0	9.00286e-05	9.17002e-05	0	0	0
ENST00000290200.7	chr21	93	1	1941	945	93	858	IL10RB	TAG	TAGG	6.89691	1.81498	0.362995	4.71894	0.00355328	0.00192061	0.00390317	0.00549993	2.86364
ENST00000405636.6	chr19	865	1	1709	1053	98	513	AC011481.1	TGA	TGAG	67.8801	43.5594	0	22.5057	0.0397192	0.041367	0	0.0438708	1.06053
ENST00000372156.5	chr10	347	1	1380	780	496	59	TSPAN14	TGA	TGAG	0.72599	0.72599	0	0	0.00052608	0.000930757	0	0	0
ENST00000222792.10	chr7	145	1	3530	1374	524	1587	CHN2	TAA	TAAT	15.2458	6.89691	0	8.34889	0.00431892	0.00501958	0	0.0052608	1.04805
ENST00000381795.10	chr4	162	-1	4473	1542	255	2631	RBM47	TGA	TGAG	1.08899	0.362995	0	0.72599	0.000243457	0.000235405	0	0.000275937	1.17218
ENST00000361987.6	chr11	440	1	1902	570	82	1205	CNTF	TAG	TAGC	9.07488	2.90396	0.362995	5.80792	0.00477123	0.00509467	0.00442677	0.00481985	0.946058
ENST00000042381.9	chr16	566	1	4092	3627	103	317	RIPOR1	TAA	TAAA	21.4167	16.3348	0	5.08193	0.0052338	0.00450366	0	0.0160313	3.55962
ENST00000377034.9	chr6	174	-1	4525	2853	328	1299	GABBR1	TGA	TGAG	5.80792	4.71894	0	1.08899	0.00128352	0.00165403	0	0.000838326	0.50684
ENST00000276202.8	chrX	521	1	6625	6189	57	334	DOCK11	TGA	TGAG	14.1568	13.7938	0	0	0.00213688	0.00222876	0	0	0
ENST00000373191.9	chr1	455	1	19660	2550	316	16749	AGO3	TAA	TAAA	96.5567	15.2458	1.45198	79.8589	0.00491133	0.00597874	0.00459487	0.00476798	0.797489
ENST00000258821.8	chr14	16	-1	4737	1290	8	3394	TTC5	TGA	TGAC	48.2784	11.6158	0	35.9365	0.0101918	0.00900453	0	0.0105882	1.17588
ENST00000276201.6	chrX	534	-1	2378	1419	64	850	UPF3B	TGA	TGAT	8.34889	6.17092	0	2.17797	0.00351089	0.00434878	0	0.00256232	0.589204
ENST00000603864.5	chr12	359	-1	1518	261	665	547	SMAGP	TAA	TAAT	18.8757	2.17797	2.90396	11.6158	0.0124346	0.00834472	0.00436686	0.0212355	2.54479
ENST00000265978.8	chr11	128	-1	3481	2928	353	155	FAM160A2	TAA	TAAC	0.362995	0	0	0	0.000104279	0	0	0	0
ENST00000265081.7	chr5	267	1	4443	3381	70	947	MSH3	TAA	TAAA	35.5735	28.3136	0	6.89691	0.00800664	0.00837433	0	0.0072829	0.869669
ENST00000432376.5	chr3	92	1	3940	2973	247	675	PLCL2	TGA	TGAG	21.7797	19.2387	0.362995	1.45198	0.00552784	0.00647115	0.00146962	0.00215108	0.332411
ENST00000536178.3	chr7	506	1	2113	1995	-2	75	SH2B2	TAG	TAGC	0.362995	0.362995	0.362995	0	0.000171791	0.000181952	-0.181498	0	0
ENST00000428638.5	chr17	657	-1	4242	2637	12	1548	ARHGAP27	TGA	TGAC	3.26696	1.08899	0	2.17797	0.000770145	0.000412964	0	0.00140696	3.40698
ENST00000336873.9	chr22	114	-1	3786	2094	503	1144	HPS4	TGA	TGAA	17.4238	11.6158	1.45198	4.35594	0.00460216	0.0055472	0.00288664	0.00380764	0.686407
ENST00000268607.9	chr16	719	1	2688	345	622	1676	MAP1LC3B	TAA	TAAA	135.76	15.2458	1.45198	116.521	0.050506	0.0441907	0.00233437	0.0695235	1.57326
ENST00000616448.1	chr10	203	-1	3197	2898	254	0	PARG	TGA	TGAG	47.5524	45.7374	1.08899	0	0.0148741	0.0157824	0.00428734	0	0
ENST00000233072.9	chr2	941	1	5821	4470	190	1116	CPS1	TAG	TAGA	0.72599	0.72599	0	0	0.000124719	0.000162414	0	0	0
ENST00000374902.9	chr9	358	-1	3077	2757	174	101	TEX10	TGA	TGAA	51.5453	48.6413	1.45198	0	0.0167518	0.0176429	0.00834472	0	0
ENST00000331479.3	chr22	305	1	1567	291	68	1163	SMDT1	TAA	TAAC	7.2599	1.81498	0.362995	4.71894	0.00463299	0.00623703	0.00533816	0.00405756	0.650559
ENST00000307138.10	chr14	156	-1	7911	6219	463	1184	RALGAPA1	TAA	TAAG	35.5735	33.0326	0	2.54097	0.00449672	0.00531155	0	0.00214609	0.404041
ENST00000454127.2	chrX	66	1	2205	921	48	1191	CA5B	TAA	TAAA	6.53391	4.35594	0	2.17797	0.00296323	0.00472958	0	0.00182869	0.38665
ENST00000269886.7	chr19	135	-1	2516	1074	173	1224	SH3GL1	TGA	TGAC	12.3418	6.89691	0	5.44493	0.00490534	0.0064217	0	0.00444847	0.692724
ENST00000258646.3	chr13	154	-1	3816	1563	38	2170	RCBTB1	TGA	TGAA	59.8942	17.0608	0	41.0184	0.0156955	0.0109154	0	0.0189025	1.73173
ENST00000267973.7	chr15	397	-1	1202	885	81	191	WDR61	TAA	TAAA	19.2387	16.3348	2.54097	0	0.0160056	0.0184574	0.0313699	0	0
ENST00000216146.9	chr22	263	-1	1296	1179	20	52	RPL3	TAA	TAAT	473.709	462.819	8.34889	0	0.365516	0.392552	0.417444	0	0
ENST00000435359.5	chr17	38	-1	5224	3897	80	1202	CLUH	TAG	TAGA	13.4308	8.34889	0	5.08193	0.00257098	0.00214239	0	0.0042279	1.97345
ENST00000642475.1	chr13	238	1	3858	1959	1284	570	TM9SF2	TGA	TGAA	117.61	75.503	6.53391	29.7656	0.0304848	0.0385416	0.00508872	0.0522204	1.35491
ENST00000325680.12	chr14	365	1	8195	6408	168	1574	YLPM1	TGA	TGAG	27.2246	21.4167	0	5.44493	0.0033221	0.00334218	0	0.00345929	1.03504
ENST00000381070.8	chr5	181	1	2065	1386	211	423	CWC27	TAA	TAAA	41.3814	34.4845	3.62995	2.54097	0.0200394	0.0248806	0.0172036	0.00600701	0.241433
ENST00000309594.5	chr13	17	1	2233	276	59	1853	MRPL57	TAA	TAAT	46.4634	12.7048	0.362995	30.4916	0.0208076	0.046032	0.00615246	0.0164553	0.357474
ENST00000396124.9	chr8	394	1	1795	969	14	767	NDUFAF6	TAA	TAAA	7.98589	7.6229	0	0.362995	0.00444897	0.00786677	0	0.000473266	0.0601602
ENST00000424785.7	chr2	800	-1	2876	636	95	2100	FKBP7	TAG	TAGC	4.35594	2.54097	0.362995	1.45198	0.00151458	0.00399523	0.003821	0.000691419	0.173061
ENST00000371655.4	chr1	629	-1	12780	627	143	11965	RAB3B	TAG	TAGG	258.09	10.8899	0	246.474	0.0201948	0.0173682	0	0.0205996	1.18605
ENST00000421176.4	chr19	844	1	4336	1749	195	2347	ZNF284	TAA	TAAT	5.44493	1.45198	1.08899	2.90396	0.00125575	0.000830178	0.00558454	0.00123731	1.49041
ENST00000389793.6	chr1	1792	-1	13480	11373	169	1893	LYST	TGA	TGAA	3.26696	2.90396	0.362995	0	0.000242356	0.000255338	0.0021479	0	0
ENST00000237853.9	chr5	304	-1	5826	1890	124	3767	ELL2	TAG	TAGA	304.916	174.238	0.72599	128.137	0.0523371	0.0921892	0.00585476	0.0340157	0.368977
ENST00000404771.8	chr10	327	-1	4014	3834	127	8	KCNMA1	TGA	TGAC	82.3999	82.0369	0.362995	0	0.0205281	0.0213972	0.00285823	0	0
ENST00000396385.4	chr16	222	1	5894	558	138	5153	MPV17L	TGA	TGAG	191.298	7.6229	0	182.95	0.0324565	0.0136611	0	0.0355035	2.59887
ENST00000348462.6	chr9	479	-1	452	339	39	29	RPL35	TGA	TGAG	130.678	116.521	9.07488	0	0.289111	0.343721	0.232689	0	0
ENST00000430262.2	chr17	713	-1	4701	1788	460	2408	ZNF652	TAA	TAAC	10.1639	4.71894	1.45198	3.99295	0.00216206	0.00263923	0.00315648	0.0016582	0.62829
ENST00000253008.2	chr9	565	1	2476	1071	54	1306	PRDM12	TGA	TGAG	0.72599	0	0	0.72599	0.000293211	0	0	0.000555888	0
ENST00000394056.6	chr6	423	1	2770	1827	489	409	KLC4	TGA	TGAC	0.72599	0.72599	0	0	0.00026209	0.000397367	0	0	0
ENST00000405785.5	chr7	64	1	3095	2595	330	125	MIOS	TAA	TAAA	24.3207	23.5947	0.362995	0.362995	0.00785805	0.00909236	0.00109999	0.00290396	0.319385
ENST00000442544.7	chr18	162	1	10181	4311	585	5240	DCC	TAA	TAAC	0.362995	0	0	0.362995	3.56542e-05	0	0	6.92739e-05	0
ENST00000436120.7	chr19	671	1	5186	1797	163	3181	ZNF527	TGA	TGAT	1.45198	1.08899	0	0.362995	0.000279981	0.000606002	0	0.000114114	0.188306
ENST00000249837.7	chr15	243	-1	13300	11100	93	2062	VPS13C	TAA	TAAT	85.3039	66.0651	0	17.7868	0.00641382	0.00595181	0	0.00862598	1.4493
ENST00000357103.5	chr12	12	1	3971	1128	202	2596	ADIPOR2	TGA	TGAT	178.231	17.4238	1.81498	157.177	0.0448831	0.0154466	0.00898503	0.0605458	3.91968
ENST00000261643.8	chr17	227	1	2898	1299	96	1458	COX10	TGA	TGAG	35.5735	15.9718	1.81498	17.4238	0.0122752	0.0122954	0.018906	0.0119505	0.971942
ENST00000626395.2	chr10	564	-1	2906	1119	539	1203	ZDHHC6	TAA	TAAG	34.4845	25.4097	7.2599	0.362995	0.0118667	0.0227075	0.0134692	0.000301742	0.0132882
ENST00000269391.11	chr17	950	-1	5054	2007	247	2755	RNF157	TGA	TGAG	60.6202	25.7727	0	34.8475	0.0119945	0.0128414	0	0.0126488	0.985005
ENST00000394092.6	chr4	550	1	1658	1365	234	14	SMAD1	TAA	TAAA	8.71188	7.6229	0.362995	0.72599	0.00525445	0.00558454	0.00155126	0.0518564	9.28571
ENST00000374024.4	chr1	355	1	2137	960	115	1017	GPR3	TAG	TAGC	1.81498	0	0	1.08899	0.00084931	0	0	0.00107078	0
ENST00000382085.7	chr5	76	-1	1195	1152	3	-5	AMACR	TAA	TAAA	1.81498	1.81498	0	0	0.00151881	0.0015755	0	0	0
ENST00000314358.10	chr5	458	1	6724	5253	105	1321	KDM3B	TAG	TAGG	80.2219	39.9295	0	38.8405	0.0119307	0.00760127	0	0.0294023	3.86808
ENST00000374433.7	chr10	158	-1	1159	789	143	182	ZNF32	TGA	TGAC	11.6158	9.07488	0.362995	1.08899	0.0100223	0.0115017	0.00253843	0.00598344	0.52022
ENST00000617633.5	chr17	432	-1	6383	1767	20	4551	DDX52	TAA	TAAA	38.8405	15.9718	0	22.8687	0.00608499	0.00903893	0	0.00502498	0.555927
ENST00000224721.11	chr10	282	1	11124	10032	384	663	CDH23	TGA	TGAC	1.08899	1.08899	0	0	9.78951e-05	0.000108551	0	0	0
ENST00000216121.11	chr22	139	-1	2237	822	249	1121	NIPSNAP1	TGA	TGAT	34.1215	4.35594	0	29.7656	0.0152533	0.0052992	0	0.0265527	5.0107
ENST00000336665.9	chr2	1096	1	5427	2382	574	2426	AGAP1	TGA	TGAG	67.8801	38.4775	0.362995	28.3136	0.0125078	0.0161534	0.000632396	0.0116709	0.722503
ENST00000392650.8	chr17	886	-1	11079	6486	351	4197	SDK2	TGA	TGAC	2.17797	0.362995	0	1.81498	0.000196585	5.59659e-05	0	0.000432446	7.72695
ENST00000282096.9	chr11	209	1	5995	3306	266	2378	PDE3B	TAG	TAGC	34.1215	13.0678	0	19.9647	0.00569167	0.00395276	0	0.0083956	2.12398
ENST00000551241.5	chr12	790	1	2416	1050	27	1294	OAS1	TAG	TAGT	0.362995	0	0	0	0.000150246	0	0	0	0
ENST00000296679.9	chr5	245	-1	3678	1347	90	2196	WDR41	TAG	TAGT	23.9577	11.2528	0	12.3418	0.00651378	0.00835401	0	0.00562014	0.672748
ENST00000361991.6	chr5	371	1	2424	1311	24	1044	CSNK1G3	TGA	TGAC	81.6739	44.2854	0.72599	34.4845	0.0336939	0.0337799	0.0302496	0.0330312	0.977836
ENST00000510080.1	chr5	466	1	858	351	186	276	PAIP2	TGA	TGAG	55.1753	37.0255	1.45198	14.5198	0.0643068	0.105486	0.00780635	0.052608	0.498721
ENST00000375135.4	chrX	272	-1	4343	2853	796	649	FGD1	TAG	TAGA	1.08899	0.362995	0	0.72599	0.000250745	0.000127233	0	0.00111863	8.79199
ENST00000511437.6	chr5	38	-1	2651	669	9	1928	ATPSCKMT	TAA	TAAA	13.4308	6.53391	0.362995	6.53391	0.00506632	0.00976668	0.0403328	0.00338896	0.346992
ENST00000569842.5	chr16	487	1	2834	2610	90	89	NUP93	TAG	TAGG	35.2105	34.4845	0.72599	0	0.0124243	0.0132125	0.00806656	0	0
ENST00000216259.8	chr22	291	-1	1242	756	29	412	PMM1	TGA	TGAC	3.99295	2.54097	0	1.08899	0.00321493	0.00336107	0	0.00264317	0.786408
ENST00000250076.7	chr17	94	-1	2179	1302	649	183	ZNF232	TGA	TGAA	4.35594	2.54097	1.08899	0	0.00199906	0.00195159	0.00167794	0	0
ENST00000374423.9	chr2	913	1	10285	7032	380	2828	ZDBF2	TAG	TAGA	43.1964	28.6766	0	14.5198	0.00419994	0.00407802	0	0.0051343	1.25902
ENST00000544814.5	chr3	15	-1	1636	1095	34	462	SSUH2	TGA	TGAC	0.362995	0.362995	0	0	0.00022188	0.000331502	0	0	0
ENST00000643460.1	chr7	131	-1	2211	975	70	1121	HOXA1	TGA	TGAG	5.08193	0.362995	0	4.71894	0.00229848	0.000372303	0	0.00420958	11.3069
ENST00000543589.5	chr12	933	1	632	450	23	114	PXMP2	TAA	TAAA	9.43787	9.07488	0	0	0.0149333	0.0201664	0	0	0
ENST00000354570.7	chr6	778	-1	4152	2217	405	1485	MAP7	TGA	TGAG	0.362995	0.362995	0	0	8.74266e-05	0.000163733	0	0	0
ENST00000403733.8	chr4	660	1	8862	3546	229	5042	WWC2	TGA	TGAT	165.889	100.913	0	64.9761	0.0187191	0.0284582	0	0.012887	0.452839
ENST00000273047.9	chr3	97	1	2518	615	512	1346	RAB5A	TAA	TAAA	82.7629	29.7656	7.2599	45.3744	0.0328685	0.0483993	0.0141795	0.0337105	0.696508
ENST00000266025.4	chr3	320	-1	2107	1023	452	587	TMEM115	TAA	TAAC	6.89691	2.17797	0	4.71894	0.00327333	0.002129	0	0.00803907	3.77598
ENST00000534182.2	chr11	997	1	1669	219	106	1299	ARCN1	TAG	TAGA	90.0228	11.6158	2.17797	75.866	0.0539382	0.0530404	0.0205469	0.0584034	1.10111
ENST00000374884.2	chrX	299	-1	4117	717	519	2836	SPIN4	TAA	TAAA	27.9506	12.3418	2.90396	12.7048	0.00678908	0.0172132	0.0055953	0.00447984	0.260257
ENST00000308275.8	chr15	379	1	10707	1179	80	9403	FBXO22	TAA	TAAT	25.7727	10.8899	0.362995	14.5198	0.00240708	0.00923652	0.00453744	0.00154417	0.167181
ENST00000381655.7	chr13	36	1	9672	3534	233	5860	ATP8A2	TAA	TAAG	2.17797	0	0	2.17797	0.000225183	0	0	0.000371667	0
ENST00000256951.10	chr12	169	1	5913	441	183	5244	EMP1	TAA	TAAG	1107.14	90.0228	30.4916	981.539	0.187237	0.204133	0.166621	0.187174	0.916919
ENST00000379270.4	chrX	103	1	1065	483	173	364	SAT1	TGA	TGAG	47.9154	34.4845	8.71188	1.45198	0.0449909	0.0713966	0.0503577	0.00398896	0.0558704
ENST00000371144.7	chrX	566	1	4281	3663	274	299	STAG2	TAA	TAAT	143.746	129.589	2.17797	10.8899	0.0335777	0.0353779	0.0079488	0.0364209	1.02948
ENST00000378755.9	chr1	35	1	2612	1872	88	607	ATAD3A	TGA	TGAG	3.26696	2.90396	0	0.362995	0.00125075	0.00155126	0	0.000598015	0.385502
ENST00000422556.1	chr20	357	-1	4138	1530	344	2219	SPATA2	TAG	TAGA	6.53391	1.45198	0	5.08193	0.001579	0.000949007	0	0.00229019	2.41325
ENST00000006053.7	chr16	498	1	3285	1161	73	2006	CX3CL1	TGA	TGAA	1.45198	0	0	1.45198	0.000442003	0	0	0.000723819	0
ENST00000408923.8	chr5	720	1	2323	1668	95	515	RGS14	TGA	TGAC	2.54097	2.17797	0	0.362995	0.00109383	0.00130574	0	0.000704845	0.539806
ENST00000419716.7	chr8	307	1	4697	2583	555	1514	SULF1	TAA	TAAT	0.362995	0.362995	0	0	7.72823e-05	0.000140532	0	0	0
ENST00000323076.7	chr13	136	-1	3643	1851	85	1662	LCP1	TGA	TGAG	2.90396	1.08899	0	1.81498	0.000797134	0.000588323	0	0.00109204	1.8562
ENST00000458591.6	chr14	133	1	2359	1896	221	197	SCFD1	TAA	TAAC	45.0114	43.1964	0	0.362995	0.0190807	0.0227829	0	0.00184261	0.080877
ENST00000331173.5	chr10	210	-1	4105	1818	36	2206	CSTF2T	TGA	TGAA	27.2246	14.1568	0.72599	11.6158	0.00663207	0.00778702	0.0201664	0.00526557	0.676198
ENST00000232496.5	chr3	316	-1	1669	300	118	1206	TUSC2	TGA	TGAC	19.2387	5.08193	0	13.4308	0.0115271	0.0169398	0	0.0111367	0.657427
ENST00000356218.8	chr14	208	1	4768	1812	487	2424	FRMD6	TAA	TAAA	270.431	127.048	7.6229	131.041	0.056718	0.070115	0.0156528	0.0540599	0.771018
ENST00000367590.8	chr1	1464	1	8474	2058	192	6179	XPR1	TGA	TGAA	140.842	62.0722	2.54097	74.051	0.0166205	0.0301614	0.0132342	0.0119843	0.397339
ENST00000479870.6	chr7	735	-1	5754	2733	224	2752	TCAF1	TGA	TGAA	37.3885	7.2599	0.362995	29.4026	0.00649783	0.00265639	0.00162051	0.0106841	4.02204
ENST00000327443.9	chr12	416	1	7680	2325	110	5200	SP1	TGA	TGAG	311.087	60.6202	0.362995	248.652	0.0405061	0.0260732	0.00329996	0.0478176	1.83398
ENST00000609923.6	chr10	250	-1	6581	966	142	5428	SLC25A16	TAA	TAAA	21.4167	5.80792	0	15.2458	0.00325432	0.00601234	0	0.00280873	0.467161
ENST00000319550.9	chr6	690	1	6919	1335	72	5467	NT5DC1	TAA	TAAG	11.2528	1.45198	0	9.80087	0.00162637	0.00108763	0	0.00179273	1.6483
ENST00000410092.7	chr18	47	-1	5533	2196	173	3119	SPIRE1	TGA	TGAG	178.231	66.7911	0	110.714	0.0322123	0.0304149	0	0.0354965	1.16708
ENST00000593209.5	chr17	571	-1	1827	1407	158	217	GHDC	TGA	TGAG	1.08899	1.08899	0	0	0.000596051	0.000773977	0	0	0
ENST00000269844.4	chr21	142	-1	4881	4491	105	240	PRDM15	TGA	TGAG	3.99295	3.26696	0	0.72599	0.000818059	0.000727445	0	0.00302496	4.15833
ENST00000405858.6	chr7	59	-1	5075	2061	560	2409	ZNF12	TGA	TGAA	55.5383	16.3348	0.362995	37.7515	0.0109435	0.00792566	0.000648206	0.015671	1.97725
ENST00000449465.2	chr11	332	-1	358	264	20	29	C11orf94	TGA	TGAC	0.362995	0.362995	0	0	0.00101395	0.00137498	0	0	0
ENST00000389617.8	chr3	433	1	3260	1299	155	1761	GXYLT2	TGA	TGAA	58.0792	31.5806	0	26.1356	0.0178157	0.0243115	0	0.0148414	0.610468
ENST00000233623.9	chr2	374	1	3235	1527	1	1662	TTC31	TGA	TGAG	5.44493	1.08899	0	4.35594	0.00168313	0.000713153	0	0.0026209	3.67509
ENST00000375712.4	chr20	176	1	6116	2211	174	3686	KIF3B	TAA	TAAA	278.054	66.0651	0.362995	209.448	0.0454634	0.0298802	0.00208618	0.0568226	1.90168
ENST00000339298.2	chr14	230	1	6667	1290	216	5116	SOCS4	TAG	TAGT	199.284	54.4493	0.72599	143.02	0.0298912	0.0422087	0.00336107	0.0279554	0.662314
ENST00000251691.5	chr6	788	1	14859	6501	142	8171	ARFGEF3	TAG	TAGC	302.738	65.7021	0	235.584	0.020374	0.0101065	0	0.0288317	2.8528
ENST00000523213.1	chr5	641	-1	2484	1752	515	172	ZBED8	TAA	TAAG	1.45198	1.45198	0	0	0.000584533	0.000828756	0	0	0
ENST00000370706.9	chr6	522	1	5088	3153	60	1830	ZNF451	TAA	TAAT	37.3885	26.4986	0.362995	9.07488	0.00734837	0.00840426	0.00604992	0.00495895	0.590052
ENST00000594534.5	chr19	531	1	757	585	132	-5	ZNF66	TAA	TAAA	0.362995	0.362995	0	0	0.000479518	0.000620504	0	0	0
ENST00000454963.5	chr3	271	-1	1849	1182	202	420	PRKAR2A	TAG	TAGC	96.1937	58.0792	0.72599	32.6696	0.0520247	0.0491364	0.00359401	0.0777847	1.58304
ENST00000323702.9	chr12	73	1	1208	906	106	151	LRRC23	TAG	TAGG	4.71894	4.35594	0.362995	0	0.0039064	0.00480788	0.00342448	0	0
ENST00000405878.5	chr22	293	1	2200	1797	140	218	XRCC6	TGA	TGAC	121.966	101.276	0.72599	17.4238	0.0554393	0.0563582	0.00518564	0.0799255	1.41817
ENST00000638419.1	chr11	1031	1	3593	2838	291	419	GRIK4	TAG	TAGT	1.81498	1.81498	0	0	0.000505142	0.000639526	0	0	0
ENST00000412916.6	chr16	544	1	2971	531	157	2238	CBFB	TAA	TAAT	247.926	84.2149	2.54097	159.355	0.0834486	0.158597	0.0161845	0.0712041	0.448963
ENST00000554736.5	chr14	209	1	569	183	131	210	GNG2	TAA	TAAG	21.0537	8.71188	1.08899	7.6229	0.0370013	0.0476059	0.00831287	0.0362995	0.7625
ENST00000591399.5	chr17	938	-1	2225	753	419	1008	WBP2	TAG	TAGG	18.1498	4.35594	0	12.7048	0.00815719	0.00578478	0	0.012604	2.17882
ENST00000330295.10	chr8	438	1	1240	699	113	383	CTHRC1	TAA	TAAA	31.2176	29.4026	0.362995	1.45198	0.0251755	0.0420638	0.00321235	0.00379107	0.0901267
ENST00000493615.5	chr3	510	1	1876	1431	246	154	NECTIN3	TGA	TGAT	198.921	180.409	0.362995	14.5198	0.106035	0.126072	0.00147559	0.0942844	0.747864
ENST00000317647.11	chr2	738	1	2294	1488	223	538	NOSTRIN	TAA	TAAA	1.45198	1.45198	0	0	0.000632947	0.000975793	0	0	0
ENST00000561610.1	chr16	360	1	1333	891	147	250	PPP4C	TGA	TGAC	22.8687	18.1498	0.362995	3.26696	0.0171558	0.0203701	0.00246935	0.0130678	0.64152
ENST00000518721.6	chr8	509	-1	6259	3357	236	2621	ASAP1	TAG	TAGC	193.113	92.5638	1.08899	98.3717	0.0308537	0.0275734	0.00461434	0.0375321	1.36117
ENST00000618787.5	chr19	837	1	5684	2007	262	3370	ZNF283	TGA	TGAT	15.9718	6.53391	0	9.43787	0.00280996	0.00325556	0	0.00280056	0.860237
ENST00000336273.8	chr8	405	1	7662	1716	317	5584	MTDH	TGA	TGAA	539.048	167.341	2.17797	366.988	0.0703534	0.0975179	0.00687057	0.0657214	0.673941
ENST00000330560.8	chr8	133	1	3486	3039	235	167	CDCA2	TAA	TAAT	67.8801	64.6131	1.08899	1.81498	0.0194722	0.0212613	0.00463398	0.0108681	0.511169
ENST00000293502.2	chr12	503	-1	1789	909	141	694	SDR9C7	TAA	TAAA	0.362995	0	0	0	0.000202904	0	0	0	0
ENST00000438132.7	chr16	248	1	3855	3126	42	642	VPS35L	TGA	TGAC	29.0396	28.6766	0	0.362995	0.00753297	0.00917358	0	0.000565413	0.0616349
ENST00000371589.9	chr9	673	1	2707	2067	9	586	MAN1B1	TAG	TAGG	6.17092	3.26696	0	2.90396	0.00227961	0.00158053	0	0.00495556	3.13538
ENST00000582783.5	chr19	746	-1	3628	1236	7	2340	C19orf47	TAG	TAGC	4.35594	2.17797	0	1.81498	0.00120065	0.00176211	0	0.000775631	0.440171
ENST00000563924.6	chr17	842	-1	6813	2184	189	4395	PECAM1	TAG	TAGA	0.362995	0.362995	0	0	5.32798e-05	0.000166207	0	0	0
ENST00000222330.8	chr19	798	-1	2193	1419	131	598	GSK3A	TGA	TGAG	6.89691	5.80792	0	1.08899	0.00314496	0.00409297	0	0.00182105	0.444921
ENST00000358679.3	chr13	204	1	2075	885	144	1001	SLAIN1	TAA	TAAT	1.08899	0	0	1.08899	0.000524812	0	0	0.0010879	0
ENST00000330263.5	chr1	228	1	2049	687	25	1292	MRTO4	TGA	TGAA	43.5594	11.2528	4.35594	26.1356	0.0212589	0.0163797	0.174238	0.0202288	1.23499
ENST00000309863.10	chr2	534	1	7537	5022	708	1762	GCC2	TAG	TAGG	42.1074	29.4026	0.362995	12.3418	0.00558676	0.00585476	0.000512705	0.00700445	1.19637
ENST00000328024.11	chr19	234	1	1590	624	51	870	RAB11B	TGA	TGAC	10.5269	6.89691	1.45198	2.17797	0.00662067	0.0110527	0.0284702	0.00250341	0.226497
ENST00000305988.5	chr5	559	1	3443	1209	1581	608	ADRB2	TAA	TAAA	2.90396	1.45198	0	1.45198	0.000843439	0.00120098	0	0.00238813	1.98849
ENST00000590954.5	chr18	171	-1	1339	837	258	199	TXNL1	TAA	TAAG	25.4097	19.9647	0.362995	2.17797	0.0189766	0.0238527	0.00140696	0.0109446	0.45884
ENST00000468695.5	chr1	419	-1	1601	507	13	1036	ZBTB8OS	TAA	TAAG	14.5198	12.3418	0	1.81498	0.00906921	0.0243429	0	0.00175191	0.071968
ENST00000359894.6	chr19	19	-1	2387	2208	58	76	PLPPR3	TAG	TAGC	0.362995	0.362995	0	0	0.000152072	0.0001644	0	0	0
ENST00000595981.5	chr19	1265	1	895	387	225	238	ZNF544	TGA	TGAG	6.89691	5.08193	1.81498	0	0.00770604	0.0131316	0.00806656	0	0
ENST00000602845.2	chr3	965	1	870	267	37	521	NCBP2-AS2	TAA	TAAT	18.8757	0.72599	0	18.1498	0.0216963	0.00271906	0	0.0348364	12.8119
ENST00000433365.2	chr19	317	-1	1397	945	143	264	ACP5	TGA	TGAA	0.362995	0.362995	0	0	0.000259839	0.000384122	0	0	0
ENST00000297145.9	chr7	567	-1	3940	1185	119	2591	BMT2	TAA	TAAT	8.71188	3.62995	0	5.08193	0.00221114	0.00306325	0	0.00196138	0.640293
ENST00000391415.1	chr17	519	1	1157	600	51	461	KRTAP4-9	TGA	TGAG	0.362995	0.362995	0	0	0.000313738	0.000604992	0	0	0
ENST00000252071.8	chr7	769	-1	1218	600	184	389	ACTR3C	TGA	TGAG	0.72599	0.362995	0	0.362995	0.000596051	0.000604992	0	0.000933149	1.54242
ENST00000320451.6	chr19	256	-1	1563	1140	226	152	ZNF121	TGA	TGAA	36.6625	27.2246	7.2599	1.08899	0.0234565	0.0238813	0.0321235	0.00716438	0.3
ENST00000316045.9	chr10	432	1	7277	4419	851	1962	ZNF518A	TAG	TAGT	49.0043	32.3066	0.72599	15.9718	0.00673414	0.00731083	0.000853103	0.00814056	1.11349
ENST00000299441.5	chr11	143	-1	10713	9864	361	443	DCHS1	TAG	TAGC	0.362995	0.362995	0	0	3.38836e-05	3.68e-05	0	0	0
ENST00000304231.12	chr15	432	-1	1990	1032	187	726	HOMER2	TAG	TAGG	40.2925	28.6766	0.72599	9.80087	0.0202475	0.0277874	0.0038823	0.0134998	0.485825
ENST00000369536.10	chr6	596	-1	2242	1704	24	469	RARS2	TAA	TAAT	26.1356	25.4097	0	0.362995	0.0116573	0.0149118	0	0.000773977	0.0519037
ENST00000372106.5	chrX	493	1	2562	396	125	1996	NXT2	TAA	TAAA	98.7347	31.5806	3.62995	62.0722	0.0385381	0.0797489	0.0290396	0.0310983	0.389952
ENST00000424542.7	chr16	85	1	2160	981	98	1036	SLC9A3R2	TGA	TGAG	9.43787	3.62995	0	5.08193	0.00436939	0.00370026	0	0.00490534	1.32568
ENST00000310169.3	chr4	161	1	2272	1407	129	691	CHRNA9	TAG	TAGT	0.362995	0	0	0.362995	0.000159769	0	0	0.000525319	0
ENST00000370025.9	chr1	866	1	4831	1608	276	2902	PRPF38B	TGA	TGAA	28.3136	17.0608	0	10.8899	0.00586082	0.0106099	0	0.00375253	0.353681
ENST00000378494.8	chr2	222	1	1512	939	55	473	CAMKMT	TAG	TAGA	4.35594	3.62995	0	0.362995	0.00288091	0.00386576	0	0.000767432	0.19852
ENST00000615206.4	chr12	481	-1	5216	921	313	3937	RNF41	TAA	TAAG	29.7656	9.43787	1.08899	18.1498	0.0057066	0.0102474	0.00347919	0.00461005	0.449874
ENST00000601588.1	chr19	123	-1	2083	1722	312	4	ZBTB7A	TAA	TAAA	3.99295	3.62995	0.362995	0	0.00191692	0.00210799	0.00116345	0	0
ENST00000344646.9	chr10	168	-1	3241	2151	210	835	ZFAND4	TAA	TAAC	10.1639	8.71188	0.72599	0.72599	0.00313603	0.00405015	0.0034571	0.000869449	0.214671
ENST00000357332.7	chr19	343	1	1280	1014	8	213	ASNA1	TAG	TAGC	20.6907	20.6907	0	0	0.0161646	0.0204051	0	0	0
ENST00000370859.7	chr1	741	-1	3896	2121	140	1590	SLC44A5	TAG	TAGA	8.34889	4.71894	0	3.26696	0.00214294	0.00222486	0	0.00205469	0.923512
ENST00000529710.5	chr11	704	1	3228	2343	271	569	PPP6R3	TAA	TAAG	193.476	149.191	8.71188	32.6696	0.0599369	0.0636752	0.0321472	0.0574157	0.901697
ENST00000295987.13	chrX	180	-1	3210	2085	123	957	SYN1	TGA	TGAT	0.72599	0.72599	0	0	0.000226165	0.000348197	0	0	0
ENST00000651854.1	chr11	668	-1	5137	3504	1245	343	PC	TGA	TGAT	1.81498	1.45198	0	0	0.000353314	0.000414378	0	0	0
ENST00000261965.8	chr13	275	-1	3879	2691	167	976	TUBGCP3	TGA	TGAA	11.9788	9.43787	0.362995	1.45198	0.00308813	0.0035072	0.00217362	0.00148768	0.42418
ENST00000652542.1	chrX	441	1	6458	4155	1291	967	GPRASP1	TAG	TAGT	1.08899	1.08899	0	0	0.000168626	0.00026209	0	0	0
ENST00000369075.8	chr10	610	1	7148	2970	47	4086	SEC23IP	TGA	TGAT	46.4634	31.2176	0.362995	14.8828	0.00650019	0.010511	0.0077233	0.00364239	0.346532
ENST00000324439.9	chr4	305	-1	4686	753	393	3495	RCHY1	TGA	TGAC	33.7585	14.5198	0.362995	17.0608	0.00720413	0.0192826	0.000923652	0.00488148	0.253155
ENST00000356800.6	chr7	795	-1	1669	1380	123	121	SMARCD3	TAG	TAGG	1.08899	1.08899	0	0	0.000652478	0.00078912	0	0	0
ENST00000368594.8	chr10	671	1	3000	1206	304	1445	INPP5A	TGA	TGAC	59.5312	33.3956	0	25.0467	0.0198437	0.0276912	0	0.0173333	0.625952
ENST00000264157.10	chr2	650	1	6920	2160	27	4688	CCNT2	TAA	TAAT	60.2572	26.4986	0.362995	33.0326	0.00870769	0.0122679	0.0134443	0.00704619	0.574361
ENST00000289013.11	chr8	555	1	3695	1980	106	1564	RHPN1	TGA	TGAG	0.362995	0.362995	0	0	9.82395e-05	0.000183331	0	0	0
ENST00000321685.7	chr11	568	1	1288	693	459	91	DNAJC4	TGA	TGAG	9.07488	7.98589	1.08899	0	0.00704571	0.0115237	0.00237252	0	0
ENST00000372027.10	chr10	362	-1	4127	2817	68	1197	MMRN2	TGA	TGAA	0.362995	0	0	0.362995	8.79562e-05	0	0	0.000303254	0
ENST00000368576.8	chr6	701	-1	2167	1704	210	208	ZUP1	TGA	TGAA	3.99295	3.62995	0.362995	0	0.00184261	0.00213025	0.00172855	0	0
ENST00000543351.5	chr10	323	1	1424	852	78	449	VDAC2	TAA	TAAT	79.1329	59.8942	1.08899	15.9718	0.0555709	0.0702984	0.0139614	0.0355719	0.506013
ENST00000316059.7	chr11	439	1	5776	1680	213	3838	ZFP91	TAG	TAGT	344.119	106.358	0	235.221	0.0595775	0.0633081	0	0.0612873	0.968081
ENST00000256578.7	chr1	890	1	3899	2607	354	893	AMPD2	TGA	TGAG	3.26696	1.45198	0	1.45198	0.000837896	0.000556955	0	0.00162596	2.91937
ENST00000263776.8	chr11	320	1	2362	1473	428	416	ACCS	TGA	TGAG	0.362995	0.362995	0	0	0.000153681	0.000246433	0	0	0
ENST00000233714.8	chr2	940	-1	1647	1167	69	366	LANCL1	TGA	TGAA	32.6696	23.5947	0.72599	7.2599	0.0198358	0.0202182	0.0105216	0.0198358	0.981084
ENST00000591776.5	chr17	549	1	797	333	146	273	EIF1	TAA	TAAC	86.7558	48.2784	5.08193	30.1286	0.108853	0.14498	0.0348078	0.110361	0.761216
ENST00000216840.10	chr14	113	-1	2088	1671	301	71	RABGGTA	TAA	TAAG	2.90396	2.90396	0	0	0.00139079	0.00173786	0	0	0
ENST00000553458.5	chr14	354	-1	5499	1575	93	3786	ALDH6A1	TAG	TAGA	6.89691	3.62995	0	3.26696	0.00125421	0.00230473	0	0.000862904	0.374406
ENST00000282587.9	chr2	168	1	5089	1353	31	3660	SLC30A6	TGA	TGAT	107.447	21.4167	0.72599	84.5779	0.0211135	0.0158291	0.023419	0.0231087	1.45989
ENST00000616140.2	chr8	595	-1	4480	4299	55	81	CPSF1	TAG	TAGC	9.43787	9.43787	0	0	0.00210667	0.00219536	0	0	0
ENST00000612956.4	chr13	202	-1	1542	795	60	642	MYCBP2	TAA	TAAA	94.3787	66.4281	4.35594	18.8757	0.0612054	0.0835574	0.072599	0.0294015	0.351872
ENST00000325748.9	chr2	798	-1	1770	909	139	677	PRKRA	TAA	TAAA	44.2854	29.4026	2.17797	10.5269	0.02502	0.0323461	0.0156689	0.0155493	0.480716
ENST00000334743.9	chr14	500	1	4328	1542	42	2699	PPP2R5C	TAG	TAGC	290.033	194.928	2.17797	91.1118	0.0670132	0.126413	0.0518564	0.0337576	0.267043
ENST00000380763.7	chrX	37	1	1000	774	118	63	HCCS	TAA	TAAA	5.44493	3.99295	0	0.72599	0.00544493	0.00515885	0	0.0115237	2.23377
ENST00000366994.8	chr1	1657	-1	4430	2856	114	1415	INTS7	TAA	TAAC	33.3956	26.1356	2.17797	4.71894	0.0075385	0.00915114	0.019105	0.00333494	0.364429
ENST00000308020.6	chr11	16	1	2458	1431	171	811	PTDSS2	TGA	TGAC	9.07488	4.71894	0	4.35594	0.00369198	0.00329765	0	0.00537107	1.62876
ENST00000421806.3	chr10	439	1	16004	4641	499	10819	LCOR	TGA	TGAT	390.583	119.062	14.5198	254.46	0.0244053	0.0256545	0.0290978	0.0235197	0.916787
ENST00000260129.5	chr8	262	1	3782	2529	471	737	TGS1	TAA	TAAC	77.681	63.5241	2.17797	11.2528	0.0205396	0.0251183	0.00462414	0.0152685	0.607862
ENST00000296786.8	chr5	633	1	2179	924	111	1099	UBLCP1	TAG	TAGT	29.0396	15.9718	0.72599	12.3418	0.013327	0.0172855	0.00654045	0.0112301	0.649682
ENST00000527275.5	chr11	132	1	2188	1860	118	165	SMPD1	TAG	TAGG	0.72599	0.72599	0	0	0.000331805	0.000390317	0	0	0
ENST00000266037.10	chr3	326	1	9069	6060	331	2633	DOCK3	TGA	TGAG	3.26696	2.90396	0	0.362995	0.000360233	0.000479201	0	0.000137864	0.287695
ENST00000466681.1	chr7	113	1	3044	672	147	2180	MALSU1	TAA	TAAA	2.90396	2.17797	0.362995	0.362995	0.000953995	0.00324103	0.00246935	0.000166512	0.0513761
ENST00000396954.8	chr5	138	-1	4166	534	670	2917	MOCS2	TAA	TAAT	15.2458	2.90396	0.362995	10.5269	0.00365958	0.00543813	0.000541784	0.0036088	0.66361
ENST00000545746.5	chr12	33	-1	2168	1626	111	386	C12orf4	TAA	TAAA	37.7515	32.3066	0.362995	3.99295	0.017413	0.0198687	0.00327023	0.0103444	0.520638
ENST00000618464.1	chr16	82	1	1213	405	98	665	SYNGR3	TAG	TAGA	2.17797	0.72599	0	1.45198	0.00179552	0.00179257	0	0.00218343	1.21805
ENST00000380075.6	chr2	124	1	1967	1044	334	544	TRIM54	TAA	TAAG	0.362995	0	0	0	0.000184543	0	0	0	0
ENST00000356162.5	chr7	668	-1	2594	495	1074	980	CNOT4	TGA	TGAA	18.8757	6.53391	7.6229	3.26696	0.00727669	0.0131998	0.00709767	0.00333363	0.252551
ENST00000622082.4	chr11	218	1	1369	1230	-4	98	NUCB2	TAA	TAAA	36.6625	34.4845	36.6625	0.362995	0.0267805	0.0280362	-9.16563	0.00370403	0.132116
ENST00000242505.10	chr10	299	1	5408	1716	168	3479	FAM149B1	TAA	TAAG	8.71188	6.17092	0	2.54097	0.00161093	0.00359611	0	0.000730372	0.203101
ENST00000272732.10	chr2	774	1	3037	1242	76	1674	SCRN3	TAG	TAGT	16.3348	9.80087	0.362995	6.17092	0.00537859	0.0078912	0.00477625	0.00368633	0.467145
ENST00000035307.6	chr7	794	1	3978	2286	1507	140	CHPF2	TAG	TAGC	5.44493	2.54097	2.54097	0	0.00136876	0.00111153	0.00168611	0	0
ENST00000528450.5	chr11	417	-1	2358	1647	112	554	SLC43A1	TAG	TAGA	14.8828	9.07488	0	5.08193	0.00631162	0.00550994	0	0.00917316	1.66484
ENST00000439220.6	chr15	356	1	1900	1320	172	363	CSK	TGA	TGAC	17.0608	13.4308	0	3.26696	0.00897935	0.0101749	0	0.00899988	0.884521
ENST00000354700.10	chr1	21	-1	3793	2472	109	1167	ACAP3	TAG	TAGG	1.08899	0	0	1.08899	0.000287104	0	0	0.000933149	0
ENST00000649662.1	chr17	486	1	1948	1650	24	229	CDC6	TAA	TAAA	31.5806	30.4916	0	0.72599	0.0162118	0.0184798	0	0.00317026	0.171553
ENST00000628593.1	chr5	160	1	1306	783	288	190	SETD9	TGA	TGAC	6.53391	6.53391	0	0	0.005003	0.00834472	0	0	0
ENST00000506197.2	chr4	131	1	935	171	104	615	SMIM20	TGA	TGAG	16.6978	3.26696	0.362995	13.0678	0.0178586	0.019105	0.00349034	0.0212485	1.1122
ENST00000417237.5	chr3	199	1	1844	1458	239	102	TCAIM	TAA	TAAC	15.2458	12.7048	2.54097	0	0.00826778	0.00871387	0.0106317	0	0
ENST00000421017.6	chr15	240	-1	1444	987	130	282	ANXA2	TGA	TGAA	839.245	639.234	38.4775	106.721	0.581194	0.647654	0.295981	0.378442	0.584327
ENST00000359326.9	chr1	1399	1	4011	2529	350	1087	C1orf112	TGA	TGAA	14.1568	12.7048	0.362995	0.72599	0.0035295	0.00502366	0.00103713	0.000667884	0.132948
ENST00000005340.10	chr17	126	-1	2989	2178	249	517	DVL2	TAG	TAGC	12.7048	10.1639	0.362995	2.17797	0.00425053	0.0046666	0.00145781	0.00421271	0.902736
ENST00000242209.9	chr7	168	1	3424	1680	128	1571	FKBP9	TAA	TAAA	59.8942	25.4097	0	34.1215	0.0174925	0.0151248	0	0.0217196	1.43603
ENST00000311907.9	chr11	345	1	2023	1836	50	92	F2	TAG	TAGG	1.08899	0.72599	0.362995	0	0.000538302	0.00039542	0.0072599	0	0
ENST00000356489.9	chr6	569	1	1514	1146	41	282	BCKDHB	TGA	TGAC	3.62995	3.62995	0	0	0.00239759	0.0031675	0	0	0
ENST00000433765.3	chr11	339	-1	1511	1407	45	14	CHRM4	TAG	TAGG	1.45198	1.08899	0	0.362995	0.00096094	0.000773977	0	0.0259282	33.5
ENST00000273063.10	chr2	1016	1	4246	3747	208	246	SLC4A3	TGA	TGAC	0.72599	0.72599	0	0	0.000170982	0.000193752	0	0	0
ENST00000276603.10	chr8	318	1	3329	1287	17	1980	TERF1	TGA	TGAT	48.6413	19.6017	0	27.9506	0.0146114	0.0152306	0	0.0141165	0.926852
ENST00000403821.6	chr12	515	-1	3347	3000	291	11	R3HDM2	TAA	TAAA	25.0467	23.9577	0.362995	0	0.00748332	0.00798589	0.00124741	0	0
ENST00000324685.10	chr16	389	1	5634	2973	429	2187	RNF40	TGA	TGAA	36.6625	19.6017	0	17.0608	0.00650737	0.00659325	0	0.00780099	1.18318
ENST00000395860.7	chr14	195	-1	1772	657	14	1056	VCPKMT	TGA	TGAA	1.81498	0.72599	0	1.08899	0.00102425	0.00110501	0	0.00103124	0.933239
ENST00000300209.13	chr12	537	1	2687	648	105	1889	EEF1AKMT3	TGA	TGAC	5.80792	0.72599	0	5.08193	0.00216149	0.00112036	0	0.00269028	2.40127
ENST00000287713.7	chr1	1482	-1	5441	891	107	4398	NMNAT2	TAG	TAGC	141.931	20.3277	3.26696	117.61	0.0260855	0.0228145	0.0305323	0.0267418	1.17214
ENST00000340360.10	chr11	771	-1	5681	2346	326	2964	XRRA1	TAG	TAGA	8.34889	2.90396	0	5.44493	0.00146962	0.00123784	0	0.00183702	1.48406
ENST00000325974.8	chr7	45	1	1802	1416	60	281	CCZ1	TGA	TGAC	17.0608	13.4308	0	3.62995	0.00946769	0.00948504	0	0.012918	1.36193
ENST00000614239.1	chr17	425	1	3425	1188	717	1475	LHX1	TAG	TAGC	1.45198	0.362995	0	1.08899	0.000423936	0.000305551	0	0.000738295	2.41627
ENST00000381527.8	chr13	39	1	3065	1362	507	1151	CDK8	TGA	TGAG	26.8616	19.6017	0	6.53391	0.00876399	0.0143919	0	0.00567673	0.39444
ENST00000290705.12	chr16	481	1	396	153	67	131	MT1A	TGA	TGAT	1.81498	1.81498	0	0	0.00458327	0.0118626	0	0	0
ENST00000242776.8	chr19	386	-1	1471	1251	96	79	DDX39A	TAA	TAAC	35.2105	31.5806	2.54097	0	0.0239365	0.0252443	0.0264684	0	0
ENST00000379068.7	chrX	111	1	5486	4374	37	1030	POLA1	TAA	TAAG	40.6555	27.2246	0	12.7048	0.00741076	0.0062242	0	0.0123348	1.98175
ENST00000535642.5	chr10	156	-1	1904	1344	165	350	ZNF239	TAA	TAAC	2.54097	2.54097	0	0	0.00133454	0.0018906	0	0	0
ENST00000202677.12	chr20	120	-1	9545	5589	158	3753	RALGAPA2	TAA	TAAA	14.5198	6.17092	0	8.34889	0.00152119	0.00110412	0	0.00222459	2.01481
ENST00000283290.9	chr3	522	-1	1570	912	429	184	ATG3	TAA	TAAT	45.7374	43.9224	0.72599	0	0.0291321	0.0481605	0.00169228	0	0
ENST00000599538.5	chr19	1033	-1	2126	1392	659	30	VRK3	TAG	TAGG	8.34889	7.98589	0.362995	0	0.00392704	0.00573699	0.000550827	0	0
ENST00000356260.10	chr4	313	-1	3003	2031	98	829	SDAD1	TAA	TAAC	126.685	100.55	5.08193	18.5128	0.0421862	0.0495075	0.0518564	0.0223314	0.451072
ENST00000399933.8	chr9	31	-1	7669	6279	689	656	KIAA2026	TGA	TGAA	50.0933	48.2784	0	1.81498	0.00653192	0.00768886	0	0.00276673	0.359836
ENST00000316981.8	chr8	265	-1	7311	1470	468	5328	PLAG1	TAG	TAGG	72.962	17.7868	2.90396	52.2713	0.00997976	0.0120998	0.00620504	0.00981068	0.810811
ENST00000297347.7	chr8	466	1	985	504	158	278	MED30	TAA	TAAG	8.71188	7.98589	0.72599	0	0.00884455	0.015845	0.00459487	0	0
ENST00000377990.7	chr2	293	1	5803	2241	153	3364	CEP68	TAA	TAAC	23.5947	2.54097	0	20.6907	0.00406595	0.00113385	0	0.00615063	5.42454
ENST00000355697.6	chr10	602	-1	1363	981	14	323	SFXN4	TAG	TAGG	14.8828	11.6158	0.362995	2.54097	0.0109191	0.0118408	0.0259282	0.00786677	0.664377
ENST00000225972.8	chr17	733	-1	2880	891	200	1744	LRRC59	TGA	TGAG	148.465	37.3885	1.81498	107.447	0.0515503	0.0419624	0.00907488	0.0616093	1.4682
ENST00000262764.11	chr17	979	1	2297	1638	11	603	PGS1	TGA	TGAG	4.35594	2.90396	0	1.45198	0.00189636	0.00177287	0	0.00240793	1.35821
ENST00000381990.6	chr7	112	1	2763	1686	155	877	GPNMB	TAA	TAAA	0.362995	0.362995	0	0	0.000131377	0.0002153	0	0	0
ENST00000439350.1	chr5	275	1	758	642	49	22	ATP6AP1L	TAG	TAGC	0.362995	0.362995	0	0	0.000478885	0.000565413	0	0	0
ENST00000240488.7	chr4	578	1	968	585	83	255	MND1	TAA	TAAA	27.2246	23.2317	0.362995	1.45198	0.0281246	0.0397123	0.00437344	0.00569404	0.143382
ENST00000546966.5	chr12	611	-1	754	549	56	104	CSRP2	TAA	TAAG	3.26696	1.08899	0	2.17797	0.00433283	0.00198358	0	0.020942	10.5577
ENST00000322776.10	chr11	691	1	1596	1362	147	42	NDUFV1	TAG	TAGC	10.5269	10.1639	0.362995	0	0.00659578	0.00746245	0.00246935	0	0
ENST00000319357.6	chr7	197	1	3918	1212	130	2531	STK17A	TGA	TGAG	21.7797	11.6158	0.362995	9.80087	0.00555888	0.00958403	0.00279227	0.00387233	0.40404
ENST00000529721.5	chr11	780	-1	3222	1785	531	861	GDPD5	TAG	TAGC	2.90396	1.81498	0	0.72599	0.000901291	0.00101679	0	0.000843194	0.829268
ENST00000369713.10	chr10	544	1	813	693	31	44	GSTO1	TGA	TGAA	6.17092	5.44493	0.362995	0	0.0075903	0.00785704	0.0117095	0	0
ENST00000380668.9	chrX	42	1	2511	924	122	1420	PRPS2	TAA	TAAA	140.116	83.8519	1.45198	52.2713	0.0558009	0.0907488	0.0119015	0.0368108	0.405634
ENST00000509193.5	chr5	261	-1	1441	1230	91	75	SERINC5	TGA	TGAT	6.53391	6.53391	0	0	0.00453429	0.00531212	0	0	0
ENST00000307662.5	chr5	583	1	5359	2679	521	2114	SYNPO	TAG	TAGA	7.2599	3.99295	0.72599	2.54097	0.00135471	0.00149046	0.00139346	0.00120197	0.806442
ENST00000367478.9	chr1	1499	-1	9636	7059	219	2313	TPR	TAA	TAAA	184.765	181.135	0	3.62995	0.0191744	0.0256601	0	0.00156937	0.0611599
ENST00000369802.7	chr1	895	1	2484	1632	119	688	CSF1	TAG	TAGA	0.362995	0.362995	0	0	0.000146133	0.000222423	0	0	0
ENST00000243662.11	chr11	831	-1	1432	603	53	731	RAB38	TAG	TAGT	1.45198	0.362995	0	1.08899	0.00101395	0.000601982	0	0.00148972	2.47469
ENST00000375078.4	chr1	245	-1	2326	204	825	1252	CAMK2N1	TAA	TAAC	2.17797	0	0	2.17797	0.000936359	0	0	0.00173959	0
ENST00000378026.5	chr12	720	-1	3121	1776	163	1137	CKAP4	TAA	TAAA	75.503	26.8616	0	46.1004	0.0241919	0.0151248	0	0.0405456	2.68074
ENST00000620048.6	chr1	1525	-1	8365	2295	319	5706	DENND1B	TAA	TAAA	13.4308	4.35594	0	9.07488	0.0016056	0.00189801	0	0.00159041	0.837934
ENST00000604420.5	chr9	530	1	3030	2457	306	222	ODF2	TGA	TGAG	82.3999	75.503	1.45198	5.08193	0.0271947	0.0307297	0.00474503	0.0228916	0.744932
ENST00000585809.5	chr19	28	1	1608	1266	77	220	WDR18	TGA	TGAG	4.35594	2.17797	0	2.17797	0.00270892	0.00172036	0	0.00989987	5.75455
ENST00000373004.5	chrX	412	1	6646	1365	441	4795	SRPX2	TGA	TGAA	3.99295	0.72599	0	3.26696	0.000600804	0.000531861	0	0.000681326	1.28102
ENST00000622254.1	chr14	231	1	2836	705	119	1967	MAPK1IP1L	TAA	TAAG	149.917	44.6484	7.6229	95.4677	0.0528621	0.0633311	0.064058	0.0485347	0.766365
ENST00000256897.9	chr5	283	-1	1280	939	130	166	CCNH	TAA	TAAC	31.2176	28.6766	2.17797	0.362995	0.0243887	0.0305395	0.0167536	0.00218672	0.0716029
ENST00000217957.9	chrX	486	1	2997	1131	111	1710	VSIG1	TAG	TAGG	1.45198	0.72599	0	0.72599	0.000484478	0.000641901	0	0.000424556	0.661404
ENST00000281141.9	chr10	48	1	1321	978	52	246	CDC123	TGA	TGAT	99.8237	80.9479	3.62995	11.9788	0.0755667	0.0827688	0.0698068	0.0486945	0.588319
ENST00000613122.4	chr18	238	1	5866	2853	141	2827	CTDP1	TGA	TGAG	1.45198	1.08899	0	0.362995	0.000247525	0.000381698	0	0.000128403	0.336399
ENST00000312629.10	chr11	681	1	1733	1416	46	226	RPS6KB2	TAG	TAGG	19.6017	17.7868	0.362995	1.45198	0.0113109	0.0125613	0.0078912	0.00642469	0.511468
ENST00000555993.6	chr14	328	-1	4449	3324	357	723	MAP3K9	TAG	TAGC	3.62995	2.17797	0	1.45198	0.000815903	0.000655226	0	0.00200827	3.06501
ENST00000616976.1	chr20	178	-1	1376	1170	20	141	NOL4L	TAG	TAGA	17.0608	15.2458	0.362995	0.72599	0.0123988	0.0130306	0.0181498	0.00514887	0.395137
ENST00000542475.2	chr17	112	1	1756	324	190	1197	C17orf100	TGA	TGAG	3.62995	0.72599	0	2.90396	0.00206717	0.00224071	0	0.00242603	1.08271
ENST00000357275.6	chr20	306	1	1036	453	74	464	DBNDD2	TAG	TAGC	33.7585	17.0608	0	16.6978	0.0325855	0.0376617	0	0.0359866	0.955521
ENST00000038176.8	chr8	274	-1	3574	2721	216	592	NSMAF	TAA	TAAG	64.2501	50.4563	0	13.7938	0.0179771	0.0185433	0	0.0233004	1.25654
ENST00000366777.4	chr1	1732	1	2866	1911	109	801	COQ8A	TAG	TAGG	5.44493	1.81498	0	3.62995	0.00189983	0.000949752	0	0.00453177	4.77154
ENST00000206542.9	chr14	21	-1	1976	975	123	833	OSGEP	TAA	TAAT	2.54097	2.17797	0	0.362995	0.00128591	0.00223382	0	0.000435768	0.195078
ENST00000358704.4	chr1	1818	1	3851	1563	143	2100	ZBTB18	TAA	TAAT	26.4986	15.2458	0	11.2528	0.00688098	0.00975419	0	0.0053585	0.549354
ENST00000301831.9	chr3	180	-1	4294	3795	130	324	ULK4	TAG	TAGG	2.54097	2.54097	0	0	0.000591748	0.000669556	0	0	0
ENST00000367604.6	chr6	804	-1	10032	7308	1056	1623	HIVEP2	TGA	TGAT	81.6739	69.3321	3.99295	8.34889	0.00814134	0.00948715	0.0037812	0.00514411	0.542219
ENST00000375050.6	chr6	270	-1	3229	1260	281	1643	PBX2	TGA	TGAT	45.0114	23.9577	0	21.0537	0.0139397	0.019014	0	0.0128142	0.673933
ENST00000330143.7	chr8	553	1	2795	1092	403	1255	ZNF696	TGA	TGAG	5.80792	0	0.362995	5.08193	0.00207797	0	0.000900732	0.00404935	0
ENST00000392455.9	chr3	926	1	8629	1416	275	6893	CCDC50	TAA	TAAA	738.695	287.129	15.2458	429.423	0.0856061	0.202775	0.0554393	0.0622985	0.30723
ENST00000529196.5	chr11	1086	1	2402	2085	200	72	STT3A	TAA	TAAA	55.5383	48.6413	2.54097	2.17797	0.0231217	0.0233292	0.0127048	0.0302496	1.29664
ENST00000297875.7	chrX	140	1	4751	2160	466	2080	SYTL5	TAA	TAAA	11.6158	5.80792	1.45198	4.35594	0.00244493	0.00268885	0.00311584	0.0020942	0.778846
ENST00000562871.5	chr16	446	-1	4514	3642	163	664	ZNF423	TGA	TGAG	18.1498	15.6088	1.45198	0.72599	0.00402077	0.00428577	0.00890786	0.00109336	0.255113
ENST00000274811.9	chr5	704	-1	4122	1266	501	2310	RNF44	TGA	TGAG	36.6625	5.08193	0	31.2176	0.00889435	0.00401416	0	0.0135141	3.3666
ENST00000445771.6	chr7	549	1	1157	1014	45	53	BCAP29	TGA	TGAT	19.9647	17.7868	1.81498	0	0.0172556	0.0175412	0.0403328	0	0
ENST00000301281.11	chr19	137	-1	1915	1293	91	486	UBXN6	TGA	TGAA	7.2599	4.35594	0	2.54097	0.00379107	0.00336886	0	0.00522832	1.55195
ENST00000350763.9	chr9	437	-1	8500	6573	306	1576	TNC	TAA	TAAA	20.6907	15.2458	0.362995	4.35594	0.0024342	0.00231946	0.00118626	0.00276392	1.19162
ENST00000322048.11	chr16	167	-1	1735	831	373	486	ROGDI	TGA	TGAT	2.90396	1.81498	0	1.08899	0.00167375	0.00218409	0	0.00224071	1.02593
ENST00000262995.8	chr4	541	1	7981	2142	421	5373	GAB1	TGA	TGAA	23.2317	9.80087	0	13.4308	0.00291087	0.00457557	0	0.00249969	0.546312
ENST00000274458.9	chr5	352	1	1435	576	22	792	COMMD10	TGA	TGAT	11.2528	8.34889	0.72599	2.17797	0.00784171	0.0144946	0.0329996	0.00274996	0.189723
ENST00000382199.6	chr3	894	-1	3688	1767	90	1786	IGF2BP2	TGA	TGAG	246.474	146.65	2.54097	91.8378	0.0668313	0.0829938	0.028233	0.0514209	0.619576
ENST00000376588.4	chr9	253	1	2206	1080	80	1001	PSAT1	TGA	TGAA	93.2897	33.7585	0.362995	55.1753	0.0422891	0.0312579	0.00453744	0.0551201	1.7634
ENST00000607537.6	chr15	261	-1	2083	1395	404	239	CSNK1G1	TGA	TGAA	26.1356	18.1498	3.62995	3.62995	0.0125471	0.0130106	0.00898503	0.0151881	1.16736
ENST00000425699.3	chr10	599	1	4017	846	82	3044	NANOS1	TGA	TGAA	1.08899	0	0	1.08899	0.000271094	0	0	0.000357748	0
ENST00000369636.6	chr1	930	-1	786	567	44	130	RHOC	TGA	TGAG	18.1498	14.8828	1.08899	1.08899	0.0230913	0.0262483	0.0247497	0.00837681	0.319137
ENST00000281471.11	chr12	249	-1	1952	744	7	1156	AMN1	TGA	TGAT	5.08193	4.35594	0	0.72599	0.00260345	0.00585476	0	0.000628019	0.107266
ENST00000523983.6	chr8	199	1	1776	1302	166	263	LETM2	TAA	TAAA	4.71894	2.17797	0	2.54097	0.00265706	0.00167279	0	0.00966147	5.77567
ENST00000261349.9	chr12	156	-1	10252	4809	303	5095	LRP6	TGA	TGAG	180.409	60.6202	0.72599	117.61	0.0175974	0.0126056	0.00239601	0.0230835	1.83121
ENST00000243563.8	chr19	760	1	1277	816	200	216	SNRPA	TAG	TAGC	31.9436	23.9577	5.44493	1.45198	0.0250145	0.0293599	0.0272246	0.00672213	0.228956
ENST00000392441.8	chr12	880	1	2936	2016	139	736	CCDC62	TGA	TGAA	0.72599	0.72599	0	0	0.000247272	0.000360114	0	0	0
ENST00000264255.8	chr2	493	-1	1508	648	121	694	TXNDC9	TAG	TAGA	31.5806	19.2387	2.90396	8.71188	0.020942	0.0296894	0.0239997	0.0125531	0.422816
ENST00000244519.7	chr6	129	1	2970	1722	205	998	BTN3A3	TGA	TGAT	1.45198	0.362995	0	1.08899	0.000488882	0.000210799	0	0.00109117	5.17635
ENST00000335626.8	chr22	308	-1	6237	5784	129	279	TCF20	TGA	TGAG	108.173	105.632	0	2.17797	0.0173437	0.0182627	0	0.00780635	0.427447
ENST00000309880.6	chr11	612	1	2028	1383	217	383	TIGD3	TGA	TGAA	1.08899	0.362995	0	0	0.000536975	0.000262469	0	0	0
ENST00000317907.9	chr2	172	1	2888	2499	237	107	TTC27	TGA	TGAT	10.5269	9.80087	0.362995	0	0.00364503	0.00392192	0.00153162	0	0
ENST00000217289.8	chr20	74	-1	5151	2001	783	2322	FERMT1	TGA	TGAA	82.0369	24.3207	1.08899	54.8123	0.0159264	0.0121543	0.00139079	0.0236056	1.94217
ENST00000344726.9	chr6	564	-1	872	267	123	437	HMGN3	TGA	TGAA	23.2317	14.5198	4.35594	0	0.0266418	0.0543813	0.0354142	0	0
ENST00000334828.6	chr10	445	1	1802	732	111	914	PGAM1	TGA	TGAA	134.308	60.6202	0.72599	65.7021	0.0745328	0.0828145	0.00654045	0.0718842	0.868015
ENST00000381176.5	chr22	330	-1	6853	567	227	6014	SHISAL1	TGA	TGAA	0.362995	0	0	0.362995	5.29688e-05	0	0	6.03584e-05	0
ENST00000360270.7	chrX	307	1	3960	1701	182	2032	MSN	TAA	TAAT	282.773	91.8378	5.44493	183.676	0.0714074	0.0539905	0.0299172	0.0903915	1.67421
ENST00000393708.3	chr19	276	-1	1012	528	4	435	FDX2	TGA	TGAC	9.80087	6.53391	0	2.90396	0.00968465	0.0123748	0	0.00667577	0.539464
ENST00000306954.5	chr14	447	-1	1125	270	22	788	GON7	TAA	TAAC	30.8546	6.89691	0	22.8687	0.0274263	0.0255441	0	0.0290212	1.13612
ENST00000612742.4	chr2	756	-1	8132	1191	135	6761	METTL8	TGA	TGAA	35.5735	6.53391	0	28.6766	0.00437451	0.00548607	0	0.00424148	0.773135
ENST00000355296.8	chr16	155	1	2591	1329	16	1201	DNAJA3	TAG	TAGG	43.5594	15.2458	0	27.9506	0.0168118	0.0114716	0	0.0232728	2.02873
ENST00000249883.9	chr3	672	-1	4488	2310	308	1825	AMOTL2	TGA	TGAA	41.7444	5.08193	0.362995	36.2995	0.00930135	0.00219997	0.00117856	0.0198901	9.0411
ENST00000612133.4	chr17	617	-1	4938	1626	829	2438	MPP2	TGA	TGAG	1.08899	0	0	1.08899	0.000220532	0	0	0.000446672	0
ENST00000340473.8	chr13	126	1	2228	717	140	1326	GTF2F2	TAA	TAAG	35.9365	27.5876	0.72599	5.44493	0.0161295	0.0384765	0.00518564	0.00410628	0.106722
ENST00000328546.5	chr4	367	-1	2368	870	35	1418	HSD17B13	TGA	TGAA	0.362995	0	0	0.362995	0.000153292	0	0	0.000255991	0
ENST00000215957.10	chr22	235	1	4710	2559	120	1986	MICALL1	TAA	TAAC	35.5735	19.2387	0	15.6088	0.00755276	0.00751807	0	0.00785941	1.0454
ENST00000562103.2	chr16	83	-1	3366	2682	68	571	ZNF598	TAG	TAGC	11.2528	7.6229	0	3.62995	0.00334309	0.00284224	0	0.00635718	2.23668
ENST00000374468.1	chr1	290	1	814	387	385	-3	PNRC2	TAA	TAAA	58.4422	19.2387	36.6625	0	0.0717963	0.0497125	0.0952273	0	0
ENST00000238018.8	chr9	234	1	2074	1383	203	443	GDA	TAA	TAAT	87.4818	68.6061	0.72599	17.0608	0.0421802	0.0496067	0.00357631	0.0385119	0.776345
ENST00000331244.10	chr10	662	1	1318	975	24	274	GLRX3	TAA	TAAT	47.9154	43.9224	0.362995	2.54097	0.0363546	0.0450486	0.0151248	0.0092736	0.205858
ENST00000331662.3	chr4	33	1	5571	372	198	4956	NAT8L	TGA	TGAC	3.99295	0	0	3.99295	0.000716738	0	0	0.000805679	0
ENST00000585916.6	chr18	139	-1	11243	1833	156	9209	PIAS2	TAA	TAAA	46.4634	31.9436	0.362995	13.7938	0.00413265	0.0174269	0.00232689	0.00149786	0.085951
ENST00000341550.9	chr12	58	-1	1659	714	12	888	ING4	TAG	TAGA	3.62995	2.54097	0.362995	0.72599	0.00218804	0.00355878	0.0302496	0.000817557	0.22973
ENST00000410069.1	chr7	116	1	890	390	339	116	CCDC126	TAG	TAGC	0.72599	0.362995	0.362995	0	0.000815719	0.000930757	0.00107078	0	0
ENST00000307921.7	chr16	663	-1	1869	1476	140	208	ADAT1	TGA	TGAG	22.5057	19.2387	1.45198	1.45198	0.0120416	0.0130344	0.0103713	0.00698068	0.535559
ENST00000369684.5	chr1	926	1	11130	1143	292	9650	WNT2B	TGA	TGAA	3.99295	0.362995	0	3.62995	0.000358755	0.000317581	0	0.000376161	1.18446
ENST00000374695.8	chr1	261	-1	14341	13143	87	1066	HSPG2	TAG	TAGG	15.9718	8.34889	0	7.6229	0.00111371	0.000635235	0	0.00715094	11.2572
ENST00000368321.8	chr1	1216	-1	2961	1812	34	1070	KHDC4	TAG	TAGG	20.3277	11.9788	0	8.34889	0.00686516	0.00661084	0	0.0078027	1.18029
ENST00000293404.7	chr17	620	1	2182	1572	112	453	NAGS	TGA	TGAC	1.08899	0	0	1.08899	0.000499077	0	0	0.00240394	0
ENST00000269601.10	chr18	241	-1	3472	396	165	2866	TXNL4A	TGA	TGAG	55.1753	32.6696	1.08899	18.1498	0.0158915	0.0824989	0.00659991	0.00633278	0.076762
ENST00000383791.8	chr3	80	-1	3279	1335	172	1727	SH3BP5	TGA	TGAT	2.90396	1.08899	0	1.81498	0.000885624	0.000815719	0	0.00105094	1.28836
ENST00000297185.9	chr5	462	-1	4404	2007	77	2275	HSPA9	TAA	TAAT	186.579	100.55	0.362995	82.3999	0.0423659	0.0500995	0.00471422	0.0362197	0.722956
ENST00000334398.8	chrX	773	-1	3952	1233	156	2518	TMLHE	TAA	TAAA	0.72599	0.72599	0	0	0.000183702	0.0005888	0	0	0
ENST00000256413.8	chr18	147	1	5765	1764	304	3652	CTIF	TGA	TGAC	2.90396	0.72599	0	2.17797	0.000503723	0.000411559	0	0.000596378	1.44907
ENST00000215061.9	chr19	445	1	1111	762	16	288	OCEL1	TAA	TAAG	3.62995	1.45198	0	2.17797	0.00326728	0.00190549	0	0.0075624	3.96875
ENST00000431350.7	chr2	755	-1	5723	2268	459	2951	TLK1	TGA	TGAC	219.975	143.383	2.54097	73.688	0.038437	0.06322	0.00553587	0.0249705	0.394978
ENST00000216181.10	chr22	202	-1	7554	5850	274	1385	MYH9	TAA	TAAG	266.438	148.828	1.45198	114.343	0.0352712	0.0254407	0.0052992	0.0825585	3.24514
ENST00000393066.7	chr17	789	-1	3622	2862	454	261	TRIM37	TAA	TAAT	22.1427	20.6907	1.08899	0	0.00611339	0.00722946	0.00239865	0	0
ENST00000537471.5	chr14	164	1	5954	1296	332	4281	MIPOL1	TGA	TGAT	49.0043	25.0467	5.80792	15.2458	0.00823049	0.0193261	0.0174937	0.00356127	0.184272
ENST00000328221.5	chr11	10	1	844	345	333	121	IFITM1	TAG	TAGT	0.362995	0	0.362995	0	0.000430089	0	0.00109008	0	0
ENST00000379458.9	chr7	490	1	11248	9939	85	1179	MUC3A	TGA	TGAG	0.362995	0.362995	0	0	3.2272e-05	3.65223e-05	0	0	0
ENST00000418115.6	chr3	289	-1	1805	549	153	1058	RHOA	TGA	TGAA	594.586	187.668	21.4167	371.707	0.329411	0.341837	0.139979	0.35133	1.02777
ENST00000409900.8	chr2	778	-1	2652	1347	463	797	CHN1	TAA	TAAA	32.6696	24.6837	1.45198	5.80792	0.0123188	0.0183249	0.00313603	0.00728723	0.397668
ENST00000360490.6	chr3	771	1	2360	2220	72	23	MME	TGA	TGAT	0.362995	0.362995	0	0	0.000153811	0.000163511	0	0	0
ENST00000414716.8	chr14	536	1	6727	4632	267	1783	CEP170B	TAG	TAGG	6.17092	2.54097	0	3.62995	0.000917336	0.000548568	0	0.00203587	3.71124
ENST00000182290.8	chr11	64	1	1318	930	131	212	TSPAN32	TGA	TGAC	0.362995	0	0.362995	0	0.000275414	0	0.00277096	0	0
ENST00000426004.5	chr20	304	1	2915	198	174	2498	SYS1	TGA	TGAC	7.98589	0.362995	0	7.6229	0.00273959	0.00183331	0	0.0030516	1.66453
ENST00000382592.5	chr13	14	-1	5546	3234	439	1828	LATS2	TAG	TAGA	69.3321	30.4916	5.80792	30.1286	0.0125013	0.00942844	0.0132299	0.0164817	1.74809
ENST00000279394.7	chr16	354	1	4246	3117	397	687	TAOK2	TGA	TGAG	5.80792	5.80792	0	0	0.00136786	0.00186331	0	0	0
ENST00000341255.4	chr22	331	-1	5419	687	439	4248	RTL6	TAA	TAAG	43.1964	2.90396	1.45198	38.8405	0.00797129	0.00422702	0.00330747	0.00914324	2.16305
ENST00000536224.2	chr14	228	-1	1805	609	147	1004	GCH1	TAG	TAGC	13.4308	2.90396	0.362995	9.80087	0.0074409	0.00476841	0.00246935	0.00976182	2.04719
ENST00000283131.4	chr4	542	1	7684	3126	217	4296	SMARCA5	TGA	TGAA	100.913	83.4889	0.72599	15.9718	0.0131328	0.0267079	0.00334558	0.00371783	0.139203
ENST00000356577.9	chr21	99	1	8426	7248	49	1084	SON	TGA	TGAT	208.359	146.65	1.45198	59.5312	0.0247281	0.0202332	0.0296323	0.0549181	2.71426
ENST00000374234.1	chr9	406	-1	713	135	180	353	INIP	TAA	TAAT	17.7868	2.17797	4.71894	9.07488	0.0249464	0.0161331	0.0262163	0.0257079	1.59348
ENST00000394458.7	chr19	449	1	3218	1977	108	1088	ANKLE1	TGA	TGAG	16.3348	2.17797	0	13.4308	0.00507607	0.00110165	0	0.0123445	11.2054
ENST00000369705.4	chr6	577	-1	3338	1686	91	1516	ME1	TAG	TAGG	8.34889	5.08193	0.362995	2.90396	0.00250116	0.00301419	0.00398896	0.00191554	0.635507
ENST00000372759.4	chr1	505	1	2975	1395	30	1505	ZMPSTE24	TGA	TGAG	65.3391	28.3136	0.362995	35.5735	0.0219627	0.0202965	0.0120998	0.0236369	1.16458
ENST00000377818.4	chr13	189	-1	2231	216	21	1949	MZT1	TGA	TGAC	136.486	27.2246	0.72599	102.728	0.0611771	0.12604	0.034571	0.0527079	0.418184
ENST00000399262.7	chr10	237	-1	8758	7590	309	814	JMJD1C	TAA	TAAG	107.084	96.1937	0.72599	10.1639	0.0122269	0.0126737	0.00234948	0.0124863	0.985212
ENST00000261601.8	chr18	0	1	4972	1452	136	3339	USP14	TAA	TAAT	104.18	32.6696	0.362995	71.147	0.0209533	0.0224997	0.00266908	0.0213079	0.94703
ENST00000467728.5	chr11	353	1	2731	1311	1232	143	NR1H3	TGA	TGAC	10.1639	9.07488	0.362995	0.362995	0.00372166	0.0069221	0.000294639	0.00253843	0.366713
ENST00000620195.4	chr16	744	1	11031	2157	326	8503	ZNF778	TAA	TAAT	10.5269	2.54097	0	7.98589	0.000954298	0.00117801	0	0.000939185	0.797265
ENST00000308508.5	chr15	376	-1	8290	6936	87	1222	CSPG4	TGA	TGAG	2.54097	0.72599	0	1.81498	0.00030651	0.00010467	0	0.00148525	14.1899
ENST00000346177.6	chr7	627	1	9042	8046	206	745	FLNC	TGA	TGAA	1.45198	0.72599	0	0.72599	0.000160582	9.023e-05	0	0.000974484	10.8
ENST00000328404.8	chr11	575	1	780	570	47	118	CATSPERZ	TAA	TAAA	1.08899	0.72599	0	0.362995	0.00139614	0.00127367	0	0.00307623	2.41525
ENST00000422285.6	chrX	87	1	3310	1140	99	2026	PDHA1	TAA	TAAG	36.2995	17.4238	0.362995	17.7868	0.0109666	0.015284	0.00366662	0.00877925	0.574408
ENST00000309295.9	chr11	617	1	5170	4539	244	342	EHBP1L1	TGA	TGAG	6.17092	6.17092	0	0	0.0011936	0.00135953	0	0	0
ENST00000372940.3	chr10	300	-1	866	267	205	349	MRPS16	TAA	TAAA	54.0863	10.8899	1.81498	39.2035	0.0624553	0.040786	0.00885354	0.112331	2.75415
ENST00000312251.8	chr16	172	-1	2203	1515	15	628	NAGPA	TGA	TGAA	4.35594	1.81498	0	2.17797	0.00197728	0.001198	0	0.00346811	2.8949
ENST00000616417.4	chr15	39	-1	13529	4227	498	8759	FMN1	TAA	TAAG	365.173	43.1964	0	321.977	0.0269919	0.0102192	0	0.0367595	3.59712
ENST00000307546.14	chr1	935	1	6874	4413	513	1903	MAGI3	TAA	TAAC	28.3136	11.2528	0.362995	16.6978	0.00411894	0.00254993	0.000707593	0.00877445	3.44105
ENST00000371173.8	chr20	398	-1	2142	1257	125	715	ZBP1	TAG	TAGT	0.72599	0	0	0.72599	0.000338931	0	0	0.00101537	0
ENST00000424985.3	chr19	1185	-1	3191	2736	188	222	FAM71E2	TAA	TAAC	0.72599	0.72599	0	0	0.000227512	0.000265347	0	0	0
ENST00000297239.10	chr6	871	1	2292	1800	188	259	SYTL3	TGA	TGAC	0.362995	0.362995	0	0	0.000158375	0.000201664	0	0	0
ENST00000553612.6	chr14	407	-1	6343	1098	435	4765	GTF2A1	TGA	TGAA	220.701	65.7021	6.17092	145.198	0.0347944	0.059838	0.014186	0.0304718	0.509238
ENST00000286428.6	chrX	768	1	1592	561	17	969	VBP1	TAA	TAAT	75.503	37.7515	1.45198	33.7585	0.0474265	0.0672932	0.0854106	0.0348385	0.517713
ENST00000271628.9	chr1	1045	-1	1544	1242	38	219	SF3B4	TAA	TAAA	19.6017	18.8757	0	0.72599	0.0126954	0.0151979	0	0.00331502	0.218124
ENST00000506351.6	chr5	215	1	3028	2640	71	272	TNPO1	TAA	TAAT	255.912	210.9	6.17092	34.1215	0.084515	0.0798864	0.0869143	0.125447	1.57031
ENST00000418109.5	chr3	282	-1	5674	5364	159	106	LAMB2	TGA	TGAC	11.2528	10.8899	0	0	0.00198323	0.00203017	0	0	0
ENST00000425792.5	chr3	101	1	1248	573	245	385	UBE2E2	TAG	TAGG	9.07488	7.2599	0.362995	1.08899	0.00727154	0.01267	0.00148161	0.00282853	0.223247
ENST00000614556.5	chr17	824	1	6324	996	195	5088	DCAF7	TAG	TAGT	293.663	36.6625	0.362995	255.912	0.0464363	0.0368097	0.00186151	0.0502971	1.36641
ENST00000377041.6	chr9	231	-1	1312	849	295	123	ABHD17B	TGA	TGAT	6.17092	6.17092	0	0	0.00470344	0.00726845	0	0	0
ENST00000261018.11	chr2	902	1	6638	1509	270	4814	ABI2	TAA	TAAA	295.115	72.962	1.45198	216.345	0.0444584	0.0483512	0.00537771	0.0449408	0.929466
ENST00000544455.5	chr13	73	1	10984	10224	221	494	BRCA2	TAA	TAAG	118.336	105.269	0.72599	12.3418	0.0107735	0.0102962	0.00328502	0.0249835	2.42647
ENST00000352410.9	chr15	361	1	5793	1239	26	4483	MPI	TAA	TAAA	8.71188	3.99295	0	4.35594	0.00150386	0.00322272	0	0.000971658	0.301503
ENST00000265388.9	chr7	632	-1	4153	2739	138	1231	TNPO3	TAG	TAGC	121.603	72.962	3.99295	44.2854	0.0292808	0.0266382	0.0289344	0.0359751	1.35051
ENST00000520546.1	chr8	82	1	1446	840	265	296	NAT1	TAG	TAGA	2.90396	2.90396	0	0	0.00200827	0.0034571	0	0	0
ENST00000449844.6	chr19	923	1	2043	1740	156	102	NPAS1	TGA	TGAG	2.17797	1.81498	0	0.362995	0.00106606	0.00104309	0	0.00355878	3.41176
ENST00000263974.4	chr1	376	-1	1359	453	429	432	TAF12	TAA	TAAC	9.80087	5.80792	0.72599	3.26696	0.00721182	0.012821	0.00169228	0.0075624	0.589844
ENST00000356080.8	chr10	551	1	3081	2088	361	587	ADD3	TAA	TAAA	131.041	112.165	9.07488	7.2599	0.042532	0.0537191	0.0251382	0.0123678	0.230231
ENST00000216218.8	chr22	276	-1	3212	1077	93	1997	ST13	TAA	TAAT	182.587	118.336	5.08193	48.2784	0.0568451	0.109876	0.0546444	0.0241754	0.220025
ENST00000335420.10	chr7	641	1	6398	1296	104	4953	KLHDC10	TGA	TGAG	141.568	25.4097	0.72599	115.432	0.0221269	0.0196062	0.00698068	0.0233056	1.18868
ENST00000272139.5	chr1	1741	-1	1290	759	92	394	C1orf35	TGA	TGAT	1.08899	1.08899	0	0	0.000844175	0.00143476	0	0	0
ENST00000521022.6	chr8	158	-1	2549	1944	81	479	INTS9	TGA	TGAG	3.26696	1.81498	0.72599	0.72599	0.00128166	0.000933629	0.00896284	0.00151564	1.62338
ENST00000369908.9	chr20	467	-1	1954	1569	294	46	UCKL1	TAG	TAGC	18.8757	18.5128	0.362995	0	0.00966005	0.0117991	0.00123468	0	0
ENST00000007264.7	chr16	37	-1	2048	906	127	970	RPUSD1	TGA	TGAG	11.2528	2.90396	0	8.34889	0.00549456	0.00320525	0	0.0086071	2.68531
ENST00000378289.8	chr10	62	-1	3532	1272	416	1799	DCLRE1C	TAG	TAGT	11.9788	6.53391	2.54097	2.54097	0.00339152	0.00513672	0.00610809	0.00141243	0.274968
ENST00000399466.6	chr12	54	-1	2701	2394	146	116	NOP2	TAG	TAGA	17.4238	17.0608	0.362995	0	0.00645086	0.00712647	0.00248627	0	0
ENST00000288986.6	chr3	682	1	1937	1101	124	667	NCK1	TGA	TGAT	24.3207	19.6017	1.08899	2.17797	0.0125558	0.0178036	0.00878214	0.00326532	0.183408
ENST00000377069.8	chr12	857	-1	5224	3765	401	1013	KDM2B	TGA	TGAG	15.6088	10.5269	0	5.08193	0.0029879	0.00279598	0	0.00501671	1.79426
ENST00000306010.8	chr10	659	1	1265	684	20	516	MGMT	TGA	TGAG	1.45198	1.45198	0	0	0.00114781	0.00212278	0	0	0
ENST00000361060.5	chr2	313	-1	8632	2013	171	6403	GFPT1	TGA	TGAG	153.184	27.5876	1.08899	124.144	0.0177461	0.0137047	0.00636834	0.0193885	1.41473
ENST00000262519.14	chr16	395	1	5991	5091	220	635	SETD1A	TGA	TGAG	13.0678	10.1639	0	2.90396	0.00218124	0.00199644	0	0.00457317	2.29066
ENST00000420244.5	chr11	445	1	3780	1803	408	1524	FAM111A	TGA	TGAG	14.1568	6.17092	0	7.98589	0.00374519	0.00342258	0	0.00524009	1.53103
ENST00000559916.1	chr15	152	1	1081	327	28	681	B2M	TAA	TAAG	249.378	181.498	35.9365	5.08193	0.230692	0.555038	1.28345	0.00746245	0.0134449
ENST00000378617.3	chr9	148	-1	4066	3237	389	395	PIGO	TAG	TAGC	1.81498	0.362995	0	1.45198	0.000446379	0.000112139	0	0.0036759	32.7797
ENST00000320985.14	chr10	129	1	5423	3342	104	1932	ZEB1	TAA	TAAT	133.945	96.9197	0	36.2995	0.0246995	0.0290005	0	0.0187886	0.64787
ENST00000222008.11	chr19	791	-1	750	525	23	157	RABAC1	TGA	TGAG	2.17797	2.17797	0	0	0.00290396	0.00414852	0	0	0
ENST00000554203.1	chr14	75	1	725	390	106	184	C14orf119	TGA	TGAT	30.8546	13.4308	5.44493	11.6158	0.042558	0.034438	0.0513672	0.0631296	1.83314
ENST00000503292.5	chr4	99	1	5175	4830	174	126	CC2D2A	TAA	TAAT	11.9788	11.2528	0	0	0.00231475	0.00232978	0	0	0
ENST00000336216.9	chr15	389	1	3805	1011	115	2634	HMG20A	TAG	TAGG	132.13	39.2035	1.45198	91.1118	0.0347254	0.0387769	0.0126259	0.0345907	0.892042
ENST00000309234.10	chr6	111	1	1158	981	-4	136	HFE	TGA	TGAG	2.17797	1.45198	2.17797	0.72599	0.0018808	0.0014801	-0.544493	0.00533816	3.60662
ENST00000267970.8	chr15	387	-1	6467	729	268	5425	TSPAN3	TAG	TAGT	127.048	37.7515	0.362995	86.7558	0.0196456	0.0517853	0.00135446	0.0159919	0.308811
ENST00000373791.7	chr1	384	-1	2416	861	367	1143	MECR	TGA	TGAT	10.5269	6.53391	1.45198	1.81498	0.00435714	0.00758875	0.00395635	0.00158791	0.209245
ENST00000348411.3	chrX	196	1	1899	957	279	618	FTSJ1	TAA	TAAC	16.3348	7.6229	2.90396	4.71894	0.00860178	0.00796541	0.0104085	0.00763582	0.958622
ENST00000367835.1	chr1	1385	-1	2400	1557	551	247	GPR161	TGA	TGAG	7.6229	6.89691	0	0.72599	0.00317621	0.00442961	0	0.00293923	0.663541
ENST00000335154.10	chr12	332	-1	12625	3051	219	9310	FMNL3	TGA	TGAG	32.6696	4.71894	0	27.9506	0.00258769	0.00154669	0	0.00300222	1.94106
ENST00000652536.1	chr6	640	-1	7250	2100	187	4918	PREP	TAA	TAAA	23.2317	17.4238	0	4.35594	0.00320437	0.00829703	0	0.000885714	0.106751
ENST00000357749.7	chrX	400	-1	5438	1929	20	3444	CHM	TAA	TAAT	67.1541	25.0467	0	41.0184	0.012349	0.0129843	0	0.0119101	0.917273
ENST00000376736.6	chr9	246	-1	2596	435	249	1867	RFK	TGA	TGAT	30.4916	11.6158	0.362995	18.1498	0.0117456	0.0267031	0.00145781	0.00972135	0.364053
ENST00000343916.7	chr20	436	1	2485	2022	-3	421	COL9A3	TAA	TAAA	1.81498	1.45198	1.81498	0.362995	0.000730372	0.000718091	-0.604992	0.000862221	1.20071
ENST00000570010.6	chr16	653	1	3287	1191	157	1894	ZFP1	TGA	TGAA	41.7444	19.6017	1.08899	21.0537	0.0126999	0.0164582	0.00693621	0.011116	0.675408
ENST00000296137.7	chr3	223	-1	8514	4404	209	3856	FYCO1	TAG	TAGC	25.4097	7.6229	0.362995	17.4238	0.00298446	0.0017309	0.00173682	0.00451861	2.61055
ENST00000595329.5	chr19	709	-1	1299	804	126	324	FBXO17	TAG	TAGC	2.90396	2.90396	0	0	0.00223554	0.00361189	0	0	0
ENST00000400075.3	chr21	29	1	4814	1332	215	3222	GABPA	TGA	TGAG	83.1259	42.8334	1.08899	39.2035	0.0172675	0.0321572	0.00506505	0.0121674	0.378373
ENST00000379774.4	chr17	215	1	1209	996	85	83	ADPRM	TAG	TAGT	2.54097	2.17797	0.362995	0	0.00210171	0.00218672	0.00427053	0	0
ENST00000419727.6	chr14	376	1	972	459	151	317	JDP2	TGA	TGAC	2.17797	2.17797	0	0	0.00224071	0.00474503	0	0	0
ENST00000392062.7	chr2	1034	1	5061	915	419	3682	RHBDD1	TGA	TGAG	37.3885	6.89691	1.45198	28.3136	0.00738757	0.0075376	0.00346535	0.00768974	1.02018
ENST00000615575.5	chr2	78	1	1369	942	91	291	FAM228B	TAA	TAAG	0.362995	0	0	0.362995	0.000265153	0	0	0.00124741	0
ENST00000303731.8	chr17	172	-1	811	405	110	251	TRAPPC1	TGA	TGAA	12.7048	9.43787	1.08899	1.08899	0.0156656	0.0233034	0.00989987	0.00433859	0.186178
ENST00000243077.7	chr12	510	1	14897	13602	460	790	LRP1	TAG	TAGG	2.90396	2.54097	0	0.362995	0.000194936	0.000186808	0	0.000459487	2.45967
ENST00000374782.7	chr17	1006	-1	3505	3102	188	170	CEP131	TGA	TGAC	1.08899	1.08899	0	0	0.000310695	0.000351059	0	0	0
ENST00000345254.9	chr10	309	1	4445	3252	88	1060	SEC24C	TAA	TAAA	31.9436	18.8757	0	11.9788	0.00718641	0.00580435	0	0.0113008	1.94695
ENST00000312108.11	chr22	377	-1	2592	2286	45	216	CPT1B	TGA	TGAA	6.17092	5.44493	0	0.72599	0.00238076	0.00238186	0	0.00336107	1.41111
ENST00000313511.8	chr16	329	-1	2011	1335	73	558	TUFM	TGA	TGAG	34.8475	27.5876	0	5.44493	0.0173285	0.0206649	0	0.00975793	0.472199
ENST00000359039.4	chr9	78	-1	5710	1821	515	3329	KLHL9	TAG	TAGG	42.4704	12.3418	0.72599	29.4026	0.0074379	0.0067775	0.00140969	0.00883226	1.30317
ENST00000290354.6	chr21	112	1	998	801	108	44	CBR3	TAA	TAAA	1.81498	1.81498	0	0	0.00181861	0.00226589	0	0	0
ENST00000292140.9	chr19	823	-1	2591	1890	355	301	PHLDB3	TGA	TGAG	1.45198	1.45198	0	0	0.000560394	0.000768244	0	0	0
ENST00000279034.10	chr20	236	-1	3703	3018	321	319	SOGA1	TGA	TGAA	11.9788	6.89691	0	5.08193	0.0032349	0.00228526	0	0.0159308	6.97113
ENST00000263956.8	chr2	855	-1	4261	2628	66	1522	GTF3C3	TAA	TAAA	29.0396	22.1427	0.362995	6.53391	0.00681521	0.00842569	0.00549993	0.00429298	0.509511
ENST00000567147.5	chr16	98	-1	830	741	9	35	RNPS1	TAG	TAGC	54.8123	49.0043	1.45198	2.90396	0.0660389	0.0661327	0.161331	0.0829703	1.2546
ENST00000368926.5	chr1	1075	1	2096	993	102	956	C1orf56	TAA	TAAT	1.81498	1.81498	0	0	0.000865923	0.00182777	0	0	0
ENST00000253339.9	chr6	830	-1	4256	3360	222	629	LATS1	TAA	TAAC	39.5665	35.2105	0.362995	3.62995	0.00929663	0.0104793	0.00163511	0.00577099	0.550702
ENST00000280772.7	chr10	226	-1	17019	13101	331	3542	ANK3	TAA	TAAC	8.34889	6.89691	0	1.45198	0.000490563	0.000526441	0	0.000409932	0.778686
ENST00000314754.12	chr1	1633	1	2220	1290	59	826	CD55	TAG	TAGA	6.89691	5.80792	0	1.08899	0.00310671	0.00450227	0	0.00131838	0.292827
ENST00000263847.6	chr11	454	-1	4713	2391	104	2173	OSBP	TGA	TGAA	79.1329	10.1639	0	68.6061	0.0167904	0.00425088	0	0.0315721	7.42717
ENST00000238738.9	chr2	230	1	4780	585	551	3599	RHOQ	TGA	TGAG	120.514	30.4916	0	86.3928	0.0252122	0.0521224	0	0.0240047	0.460545
ENST00000350498.8	chr7	429	-1	2604	513	43	2003	PDAP1	TAA	TAAC	95.1047	59.1682	3.62995	29.4026	0.0365226	0.115338	0.0844175	0.0146793	0.127272
ENST00000409093.1	chr2	391	-1	2247	1740	331	131	LRRTM4	TAA	TAAC	0.72599	0.72599	0	0	0.000323093	0.000417236	0	0	0
ENST00000396394.6	chr11	208	-1	1505	759	391	310	PSMA1	TAA	TAAG	55.1753	43.5594	4.35594	6.17092	0.0366613	0.0573905	0.0111405	0.0199062	0.346855
ENST00000302313.10	chr3	162	1	3965	2001	4	1915	WDR48	TGA	TGAA	53.7233	28.6766	0	24.3207	0.0135494	0.0143311	0	0.0127001	0.886188
ENST00000402686.7	chr9	576	1	3038	2145	154	694	POMT1	TAG	TAGA	3.99295	2.90396	0	1.08899	0.00131433	0.00135383	0	0.00156914	1.15904
ENST00000357195.8	chr14	482	-1	8528	2652	973	4858	BCL11B	TAA	TAAG	0.362995	0	0	0.362995	4.25651e-05	0	0	7.47211e-05	0
ENST00000421755.5	chr7	451	1	1572	1329	45	153	AP4M1	TGA	TGAG	2.90396	2.54097	0	0	0.0018473	0.00191194	0	0	0
ENST00000247956.11	chr19	248	1	4056	1755	282	1974	ZNF317	TGA	TGAG	33.0326	10.1639	0.72599	21.4167	0.00814412	0.00579138	0.00257443	0.0108494	1.87337
ENST00000389749.9	chr14	519	1	3217	837	89	2246	TRMT61A	TAG	TAGG	7.6229	0.362995	0	7.2599	0.00236957	0.000433686	0	0.00323237	7.45325
ENST00000398449.7	chr21	146	1	2998	1968	139	846	ABCG1	TAA	TAAA	4.35594	1.45198	0	2.90396	0.00145295	0.000737795	0	0.00343258	4.65248
ENST00000264350.8	chr4	380	1	3511	3042	145	279	HERC5	TGA	TGAC	0.72599	0.72599	0	0	0.000206776	0.000238656	0	0	0
ENST00000423485.6	chr17	488	-1	5695	4563	99	988	TOP2A	TAA	TAAA	405.466	327.059	4.35594	70.0581	0.0711968	0.0716762	0.0439994	0.070909	0.989296
ENST00000287461.7	chr16	384	-1	3547	1470	332	1700	ZNF689	TAG	TAGA	13.7938	2.54097	0	11.2528	0.00388887	0.00172855	0	0.00661932	3.82941
ENST00000378555.8	chr7	653	-1	5986	1644	263	4034	PODXL	TAG	TAGT	945.965	92.9267	0	851.587	0.15803	0.0565248	0	0.211102	3.73468
ENST00000317025.13	chr8	198	-1	10768	4281	511	5931	NSD3	TAA	TAAA	156.088	66.0651	3.26696	86.3928	0.0144955	0.0154322	0.00639326	0.0145663	0.943893
ENST00000377687.6	chr13	193	1	3349	1341	317	1646	KLF5	TGA	TGAG	15.9718	11.6158	0	3.99295	0.00476912	0.00866208	0	0.00242585	0.280054
ENST00000256649.9	chr1	968	-1	3536	1710	542	1239	TRIM45	TGA	TGAT	1.45198	0.72599	0	0.72599	0.000410628	0.000424556	0	0.000585949	1.38015
ENST00000221494.10	chr19	71	1	1619	1362	109	103	SF3A2	TGA	TGAG	7.6229	7.2599	0.362995	0	0.0047084	0.00533032	0.00333023	0	0
ENST00000405440.6	chr12	805	-1	2203	1524	489	145	TBX5	TAA	TAAA	0.362995	0.362995	0	0	0.000164773	0.000238186	0	0	0
ENST00000347230.9	chr14	308	-1	9674	7587	134	1908	ZFYVE26	TGA	TGAC	19.2387	14.8828	0	4.35594	0.00198871	0.00196162	0	0.00228299	1.16383
ENST00000618250.4	chr12	22	1	2070	684	283	1058	RHNO1	TGA	TGAC	89.2968	55.5383	9.43787	21.4167	0.0431386	0.0811963	0.0333494	0.0202426	0.249305
ENST00000328142.3	chr10	372	-1	2939	1053	277	1564	ATAD1	TAA	TAAG	105.632	37.7515	1.08899	65.7021	0.0359413	0.0358514	0.00393136	0.042009	1.17176
ENST00000262903.9	chr6	636	-1	4575	2697	271	1562	HACE1	TAA	TAAT	12.7048	10.8899	0	1.81498	0.00277701	0.00403777	0	0.00116196	0.287772
ENST00000544582.1	chr11	960	1	692	630	0	17	RBM7	TAA	TAAA	7.98589	7.2599	0	0	0.0115403	0.0115237	0	0	0
ENST00000650736.1	chr19	1114	-1	2461	2004	231	181	ZNF665	TAG	TAGA	1.08899	1.08899	0	0	0.000442497	0.000543406	0	0	0
ENST00000370110.5	chr10	500	-1	877	504	17	311	NPM3	TAG	TAGC	37.0255	29.7656	0	6.17092	0.0422184	0.0590587	0	0.0198422	0.335974
ENST00000228495.11	chr12	749	-1	3920	909	32	2934	KCTD10	TGA	TGAG	58.0792	4.35594	0	52.2713	0.0148161	0.00479201	0	0.0178157	3.71779
ENST00000356628.4	chr9	693	-1	2641	312	337	1947	NRARP	TGA	TGAT	12.3418	1.45198	0	10.8899	0.00467317	0.00465378	0	0.00559315	1.20185
ENST00000299824.6	chr20	259	1	6259	1671	191	4352	PPP1R16B	TAG	TAGT	0.362995	0	0	0.362995	5.79957e-05	0	0	8.34088e-05	0
ENST00000301178.9	chr19	769	1	4717	2652	164	1856	AXL	TGA	TGAG	180.772	47.9154	0	128.5	0.0383234	0.0180676	0	0.0692351	3.83199
ENST00000555818.5	chr14	330	1	7831	5382	342	2062	SIPA1L1	TAG	TAGG	41.0184	35.5735	1.08899	3.62995	0.00523796	0.00660972	0.00318417	0.0017604	0.266335
ENST00000406948.7	chr16	741	1	2247	1698	128	376	ACSF3	TGA	TGAC	1.45198	1.45198	0	0	0.000646186	0.000855112	0	0	0
ENST00000648068.1	chr7	702	1	2256	1236	74	901	AGK	TGA	TGAG	18.1498	7.2599	0.72599	10.1639	0.0080451	0.00587371	0.00981068	0.0112806	1.92053
ENST00000379376.2	chr20	64	-1	5282	948	48	4241	RASSF2	TGA	TGAG	4.35594	0.72599	0	3.62995	0.000824677	0.000765812	0	0.000855919	1.11766
ENST00000331426.6	chr2	678	-1	4176	1041	130	2960	RBM43	TAA	TAAT	3.26696	0.362995	0	2.90396	0.000782317	0.000348698	0	0.000981068	2.81351
ENST00000641010.1	chr4	362	-1	4072	1389	518	2120	MAPK10	TAA	TAAT	2.90396	2.90396	0	0	0.000713153	0.00209068	0	0	0
ENST00000007390.3	chr16	51	-1	1210	906	68	191	TSR3	TGA	TGAG	13.4308	10.5269	0	2.54097	0.0110999	0.011619	0	0.0133035	1.14497
ENST00000373711.3	chr6	354	1	793	462	168	118	CDKN1A	TAA	TAAT	0.362995	0.362995	0	0	0.000457749	0.000785704	0	0	0
ENST00000222511.10	chr7	374	1	7531	1131	60	6295	GTPBP10	TAA	TAAA	50.0933	10.1639	0	39.9295	0.00665162	0.00898662	0	0.00634304	0.705832
ENST00000374094.8	chr10	308	-1	2394	2028	106	215	AGAP5	TAG	TAGT	0.362995	0.362995	0	0	0.000151627	0.000178992	0	0	0
ENST00000317096.8	chr3	864	-1	1414	1107	55	207	PARL	TAA	TAAA	32.6696	26.4986	0	3.99295	0.0231044	0.0239373	0	0.0192896	0.805837
ENST00000359568.10	chr21	212	1	10526	9978	67	436	PCNT	TGA	TGAA	51.9083	47.5524	0	4.35594	0.00493144	0.00476572	0	0.00999069	2.09637
ENST00000570819.5	chr16	142	1	833	507	52	229	NAA60	TAA	TAAC	1.08899	1.08899	0	0	0.00130731	0.0021479	0	0	0
ENST00000494062.2	chr13	83	-1	3018	1968	248	757	SPART	TGA	TGAT	0.362995	0.362995	0	0	0.000120277	0.000184449	0	0	0
ENST00000519911.5	chr5	681	1	718	144	74	455	ATP6V0E1	TAG	TAGA	24.3207	3.62995	0.72599	19.2387	0.0338728	0.025208	0.00981068	0.0422829	1.67736
ENST00000533683.6	chr19	381	-1	2164	1266	282	571	SAMD1	TGA	TGAG	26.8616	16.6978	0	9.07488	0.012413	0.0131894	0	0.015893	1.20498
ENST00000370888.6	chr6	510	1	3159	1542	246	1326	LRRC1	TAG	TAGA	3.62995	2.17797	0	1.45198	0.00114908	0.00141243	0	0.00109501	0.775264
ENST00000378105.4	chr5	513	1	4069	2439	108	1477	PCDHGA1	TGA	TGAT	4.35594	2.90396	0	1.45198	0.00107052	0.00119064	0	0.000983061	0.82566
ENST00000367941.7	chr6	759	-1	15845	753	162	14885	STX7	TGA	TGAA	52.9973	15.6088	1.08899	36.2995	0.00334473	0.0207288	0.00672213	0.00243866	0.117646
ENST00000254719.9	chr17	28	1	4340	1818	104	2373	RPA1	TGA	TGAG	54.8123	25.7727	0	25.4097	0.0126296	0.0141764	0	0.0107078	0.755328
ENST00000515406.2	chr5	571	-1	2429	1533	802	49	TIGD6	TAA	TAAT	1.81498	1.45198	0.362995	0	0.000747211	0.00094715	0.000452612	0	0
ENST00000325870.3	chr9	88	1	5586	1482	236	3823	DMRTA1	TAA	TAAT	12.3418	7.6229	0	4.71894	0.00220942	0.00514366	0	0.00123435	0.239976
ENST00000371447.3	chr10	413	1	3307	2544	132	586	PDE6C	TAA	TAAT	0.362995	0.362995	0	0	0.000109766	0.000142687	0	0	0
ENST00000326873.11	chr19	37	1	2611	1269	444	853	STK11	TGA	TGAG	17.0608	13.0678	2.17797	0.72599	0.00653419	0.0102977	0.00490534	0.000851102	0.0826495
ENST00000241051.8	chr11	286	1	1741	1503	72	121	DEPDC7	TGA	TGAG	1.45198	1.45198	0	0	0.000833992	0.000966055	0	0	0
ENST00000276014.11	chrX	237	1	4513	4155	112	201	CCNB3	TAG	TAGC	0.362995	0.362995	0	0	8.04332e-05	8.73634e-05	0	0	0
ENST00000366810.5	chr1	1726	1	2005	666	58	1236	MIXL1	TGA	TGAG	0.362995	0	0	0.362995	0.000181045	0	0	0.000293685	0
ENST00000375654.5	chr6	246	-1	2762	1893	402	422	HSPA1L	TAA	TAAT	1.08899	0.72599	0	0.362995	0.000394274	0.000383513	0	0.000860178	2.24289
ENST00000308330.3	chr12	559	1	4780	2703	8	2024	LEMD3	TGA	TGAA	32.6696	14.1568	0	18.5128	0.00683464	0.00523744	0	0.00914662	1.74639
ENST00000394854.8	chr4	418	-1	4743	1533	724	2441	PPP3CA	TGA	TGAC	201.825	78.7699	3.99295	119.062	0.0425522	0.0513829	0.00551512	0.0487761	0.949267
ENST00000223145.10	chr7	67	1	4741	1611	549	2536	GLCCI1	TAA	TAAA	20.6907	10.8899	0	9.43787	0.00436421	0.00675969	0	0.00372156	0.550552
ENST00000610432.4	chrX	377	-1	4019	1071	56	2847	MAGT1	TAA	TAAA	186.942	46.4634	0	140.116	0.0465147	0.0433832	0	0.0492154	1.13443
ENST00000398110.6	chr22	117	-1	1968	1101	299	523	TPST2	TGA	TGAT	8.34889	3.99295	0	3.62995	0.00424232	0.00362665	0	0.00694063	1.91378
ENST00000395307.6	chr19	67	1	944	612	58	229	IZUMO4	TGA	TGAC	0.362995	0.362995	0	0	0.000384529	0.000593129	0	0	0
ENST00000471138.5	chr3	451	1	2206	1254	263	644	ARL13B	TAA	TAAA	37.0255	27.9506	2.17797	5.80792	0.016784	0.0222892	0.00828126	0.00901851	0.404614
ENST00000628514.2	chr7	190	1	1591	1383	17	146	SUGCT	TGA	TGAC	1.08899	0.72599	0	0.362995	0.000684466	0.000524939	0	0.00248627	4.7363
ENST00000369172.8	chr10	596	-1	872	669	53	105	FAM204A	TAA	TAAC	30.1286	26.4986	0.72599	0	0.0345511	0.0396093	0.0136979	0	0
ENST00000530878.5	chr1	1350	1	2894	1473	398	978	NOS1AP	TAG	TAGG	3.99295	3.99295	0	0	0.00137973	0.00271076	0	0	0
ENST00000534898.8	chr14	152	1	2611	1719	354	493	KIAA0391	TAG	TAGA	20.3277	13.0678	0.72599	6.53391	0.00778542	0.00760199	0.00205082	0.0132534	1.74341
ENST00000566497.5	chr15	459	-1	1689	1131	56	457	MFGE8	TAG	TAGT	5.08193	2.90396	0	2.17797	0.00300884	0.0025676	0	0.0047658	1.85613
ENST00000259939.3	chr6	83	1	5036	879	311	3801	RNF144B	TAA	TAAA	3.99295	0.72599	0.362995	2.90396	0.000792881	0.000825927	0.00116719	0.000763999	0.92502
ENST00000337221.8	chr8	146	1	1910	1368	327	170	SCARA3	TGA	TGAT	3.26696	3.26696	0	0	0.00171045	0.00238813	0	0	0
ENST00000610283.4	chr14	332	-1	4520	1206	300	2969	DPF3	TAA	TAAA	4.35594	2.17797	0	2.17797	0.000963704	0.00180595	0	0.00073357	0.406197
ENST00000367351.4	chr6	836	1	1335	708	53	529	ULBP2	TGA	TGAG	2.17797	2.17797	0	0	0.00163144	0.00307623	0	0	0
ENST00000227868.8	chr11	300	1	2389	1473	78	793	PDHX	TAG	TAGT	49.3673	37.3885	0.362995	11.6158	0.0206644	0.0253826	0.00465378	0.014648	0.577088
ENST00000381870.7	chr17	49	1	2470	1170	453	802	CTNS	TGA	TGAC	3.62995	1.81498	0	1.81498	0.00146962	0.00155126	0	0.00226306	1.45885
ENST00000359775.10	chr6	863	1	7334	1434	826	5029	ZDHHC14	TGA	TGAC	5.80792	0.72599	0	5.08193	0.000791917	0.000506269	0	0.00101053	1.99602
ENST00000330687.8	chr16	533	-1	3414	672	176	2521	CMTM4	TAG	TAGA	74.777	9.43787	0	64.9761	0.021903	0.0140445	0	0.0257739	1.83517
ENST00000376355.7	chr13	239	1	6771	990	21	5715	CLYBL	TGA	TGAT	1.45198	1.08899	0	0.362995	0.000214441	0.00109999	0	6.35162e-05	0.0577428
ENST00000518977.5	chr5	590	-1	2200	1875	225	55	TNIP1	TAG	TAGA	43.9224	42.1074	1.45198	0.362995	0.0199647	0.0224573	0.00645325	0.00659991	0.293887
ENST00000449692.3	chr11	635	-1	1559	846	25	643	C11orf68	TAG	TAGG	6.89691	2.17797	0	4.35594	0.00442393	0.00257443	0	0.0067744	2.63142
ENST00000265164.7	chr4	452	-1	1634	849	44	696	CASP6	TAA	TAAT	5.08193	2.54097	0.362995	2.17797	0.00311012	0.00299289	0.00824989	0.00312927	1.04557
ENST00000398868.7	chr11	555	-1	7135	1593	271	5226	ATL3	TAG	TAGC	172.06	23.2317	0	147.376	0.0241149	0.0145836	0	0.0282005	1.93371
ENST00000373132.3	chr1	464	-1	3621	1275	176	2125	STK40	TAA	TAAC	69.3321	25.7727	1.81498	41.7444	0.0191472	0.0202138	0.0103124	0.0196444	0.971831
ENST00000287196.13	chr15	325	-1	2625	1860	453	267	PARP6	TGA	TGAG	96.5567	73.325	17.4238	5.80792	0.0367835	0.0394221	0.0384631	0.0217525	0.551786
ENST00000521604.7	chr8	255	-1	2777	873	317	1542	TCEA1	TGA	TGAG	290.033	198.558	3.62995	79.1329	0.104441	0.227444	0.011451	0.0513184	0.225631
ENST00000445061.6	chr3	251	1	3855	3552	191	67	DHX30	TGA	TGAG	11.6158	10.1639	1.45198	0	0.00301319	0.00286145	0.00760199	0	0
ENST00000329235.6	chrX	68	-1	2237	441	238	1513	AP1S2	TAA	TAAC	84.9409	39.5665	2.54097	38.4775	0.0379709	0.0897199	0.0106763	0.0254313	0.283452
ENST00000314994.5	chr16	760	-1	3060	531	904	1580	CENPBD1	TAG	TAGA	3.99295	0	1.45198	2.54097	0.00130488	0	0.00160617	0.00160821	0
ENST00000252530.9	chr19	693	1	1271	1017	13	196	FAM98C	TAA	TAAA	0.72599	0	0	0.72599	0.000571196	0	0	0.00370403	0
ENST00000368918.8	chr1	1078	1	8807	1314	168	7280	GABPB2	TAA	TAAT	37.3885	9.43787	1.45198	26.4986	0.00424532	0.00718255	0.00864274	0.00363992	0.506773
ENST00000373063.7	chr6	392	1	5910	1971	452	3442	FOXP4	TAA	TAAG	12.7048	3.99295	0.72599	7.98589	0.00214972	0.00202585	0.00160617	0.00232013	1.14526
ENST00000223321.9	chr7	194	-1	1434	672	10	707	PSMA2	TAA	TAAC	90.3858	72.599	1.08899	3.62995	0.0630305	0.108034	0.108899	0.0051343	0.0475248
ENST00000314117.8	chr4	141	-1	1326	783	83	415	RELL1	TAG	TAGC	18.8757	18.5128	0	0	0.0142351	0.0236434	0	0	0
ENST00000381538.7	chr4	186	-1	3728	2703	63	917	NFXL1	TAA	TAAA	11.9788	9.80087	0	2.17797	0.00321321	0.00362592	0	0.0023751	0.655035
ENST00000310054.9	chr19	768	1	2612	1482	40	1045	CYP2S1	TGA	TGAA	1.45198	0	0	1.45198	0.000555888	0	0	0.00138945	0
ENST00000300403.11	chr20	164	1	3473	2211	503	714	TPX2	TAA	TAAA	430.149	320.162	24.6837	78.044	0.123855	0.144804	0.0490729	0.109305	0.75485
ENST00000258930.7	chr15	393	-1	1598	531	323	699	CIB2	TGA	TGAG	26.1356	15.2458	0	9.43787	0.0163552	0.0287115	0	0.013502	0.470264
ENST00000289865.12	chr1	1327	1	2195	1665	215	270	USP21	TGA	TGAC	15.9718	14.1568	0.362995	0.72599	0.00727644	0.00850259	0.00168835	0.00268885	0.316239
ENST00000263851.9	chr8	336	-1	2016	501	535	935	IL7	TGA	TGAA	0.72599	0	0.72599	0	0.000360114	0	0.00135699	0	0
ENST00000620139.4	chr2	950	-1	2618	612	280	1681	MREG	TAA	TAAA	13.7938	6.53391	0	6.89691	0.00526884	0.0106763	0	0.00410286	0.384295
ENST00000646038.1	chr11	171	-1	10688	4146	599	5898	TRIM66	TGA	TGAG	8.71188	2.90396	1.45198	4.35594	0.000815109	0.000700425	0.00242401	0.000738546	1.05443
ENST00000593863.5	chr19	787	1	526	405	43	33	RPS19	TAG	TAGA	328.511	315.806	0	0.362995	0.624545	0.779767	0	0.0109999	0.0141066
ENST00000647529.1	chrX	720	-1	1433	708	245	435	BCAP31	TAA	TAAG	31.5806	17.0608	1.08899	11.2528	0.0220381	0.0240971	0.00444484	0.0258686	1.07351
ENST00000352903.6	chr15	221	1	1433	1143	18	227	TEX9	TAA	TAAG	3.62995	3.62995	0	0	0.00253311	0.00317581	0	0	0
ENST00000537505.6	chr17	98	1	5909	2556	197	3111	RABEP1	TGA	TGAC	226.509	121.24	0.72599	102.728	0.0383329	0.0474336	0.00368523	0.0330208	0.696147
ENST00000398130.6	chr18	194	1	6178	3618	226	2289	RELCH	TAG	TAGA	19.9647	14.5198	0	5.44493	0.00323158	0.00401321	0	0.00237874	0.592726
ENST00000393227.6	chr17	743	1	2284	1437	128	674	LUC7L3	TAA	TAAT	42.1074	41.7444	0.362995	0	0.0184358	0.0290497	0.0028359	0	0
ENST00000296504.4	chr4	642	1	1097	630	223	199	SAP30	TAG	TAGG	7.6229	5.80792	1.81498	0	0.00694886	0.00921892	0.0081389	0	0
ENST00000312777.9	chr12	756	1	3151	1464	208	1434	TCHP	TGA	TGAC	10.1639	5.44493	0	4.71894	0.0032256	0.00371921	0	0.00329075	0.884798
ENST00000377081.5	chr1	120	1	8746	5439	73	3189	KIF1B	TAA	TAAG	163.711	65.7021	0	96.5567	0.0187184	0.0120798	0	0.030278	2.5065
ENST00000222266.2	chr19	627	1	603	273	134	151	PSENEN	TGA	TGAC	3.99295	1.81498	1.45198	0.362995	0.0066218	0.00664826	0.0108357	0.00240394	0.361589
ENST00000360131.5	chr2	110	1	3188	2628	166	349	AGBL5	TGA	TGAT	58.8052	56.2642	0.72599	1.45198	0.0184458	0.0214095	0.00437344	0.0041604	0.194325
ENST00000396743.7	chrX	211	-1	2682	1668	55	914	OTUD5	TGA	TGAT	14.8828	9.80087	0	5.08193	0.00554914	0.00587582	0	0.0055601	0.946268
ENST00000563197.6	chr16	356	1	1154	702	64	343	INO80E	TGA	TGAC	12.7048	8.34889	0.362995	2.90396	0.0110094	0.011893	0.0056718	0.00846636	0.711877
ENST00000290299.7	chr21	103	-1	756	609	35	67	ATP5PO	TAA	TAAA	56.9902	53.3603	1.45198	0	0.0753839	0.0876195	0.0414852	0	0
ENST00000324871.12	chr12	536	-1	1378	798	16	519	METTL1	TGA	TGAC	5.08193	2.54097	0	2.54097	0.0036879	0.00318417	0	0.00489589	1.53757
ENST00000315013.9	chr5	4	1	2682	2205	51	381	EXOC3	TAG	TAGC	12.3418	10.8899	1.08899	0	0.00460173	0.00493871	0.0213527	0	0
ENST00000268668.11	chr16	76	1	675	486	81	63	NDUFB10	TGA	TGAG	22.5057	20.3277	2.17797	0	0.0333418	0.0418266	0.0268885	0	0
ENST00000373563.8	chr2	1081	1	5847	3867	189	1746	GIGYF2	TGA	TGAG	34.1215	19.6017	0	14.1568	0.00583573	0.00506898	0	0.00810814	1.59956
ENST00000393795.7	chr17	581	-1	1416	621	103	647	PSMC3IP	TGA	TGAG	23.5947	11.2528	0	11.2528	0.0166629	0.0181205	0	0.0173923	0.959815
ENST00000330828.2	chr12	177	1	1684	705	198	736	C12orf60	TAG	TAGG	0.362995	0.362995	0	0	0.000215555	0.000514887	0	0	0
ENST00000340356.9	chr20	471	-1	1862	1122	117	578	SOX18	TAG	TAGG	0.72599	0	0	0.72599	0.000389898	0	0	0.00125604	0
ENST00000375299.8	chr13	297	1	2370	1398	33	894	UPF3A	TGA	TGAG	15.6088	12.7048	0	2.90396	0.00658599	0.00908786	0	0.00324828	0.35743
ENST00000379378.8	chr16	552	1	2110	1209	67	789	E2F4	TGA	TGAC	102.002	63.5241	0	35.9365	0.048342	0.0525427	0	0.0455469	0.866855
ENST00000392837.9	chr12	724	1	5048	1650	58	3295	RIC8B	TAA	TAAA	24.3207	10.1639	0	14.1568	0.00481788	0.00615992	0	0.00429645	0.697485
ENST00000262225.8	chr12	895	1	2544	573	79	1847	TMED2	TAA	TAAA	356.098	100.187	1.08899	249.741	0.139976	0.174846	0.0137846	0.135214	0.773334
ENST00000360001.10	chr1	16	-1	1956	1056	257	598	SDF4	TGA	TGAG	14.1568	9.80087	1.45198	2.54097	0.00723763	0.00928113	0.00564973	0.00424911	0.457822
ENST00000323180.10	chr11	335	-1	3675	1872	362	1396	PHF21A	TAA	TAAC	33.7585	19.9647	3.26696	10.5269	0.009186	0.0106649	0.00902474	0.00754073	0.707059
ENST00000322088.11	chr19	1097	1	5352	1737	39	3531	PPP2R1A	TGA	TGAT	26.4986	17.0608	0	8.34889	0.00495117	0.00982197	0	0.00236445	0.240731
ENST00000618014.1	chr4	492	-1	2797	1266	299	1187	CCNA2	TAA	TAAC	68.9691	38.8405	0.72599	29.0396	0.0246582	0.0306797	0.00242806	0.0244647	0.797424
ENST00000451301.5	chrX	456	-1	1830	834	296	655	MORF4L2	TGA	TGAG	140.842	91.4748	15.6088	30.1286	0.0769629	0.109682	0.0527324	0.0459979	0.419375
ENST00000370132.8	chr1	843	-1	10799	1416	8	9330	DBT	TGA	TGAA	74.414	17.4238	0	56.6272	0.00689082	0.0123049	0	0.00606937	0.493248
ENST00000219431.4	chr16	2	1	1193	864	225	59	MPG	TGA	TGAG	3.62995	2.90396	0.362995	0	0.00304271	0.00336107	0.00161331	0	0
ENST00000216832.9	chr14	172	1	3537	2121	20	1351	PNN	TAA	TAAT	63.5241	54.4493	0.362995	5.80792	0.0179599	0.0256715	0.0181498	0.00429898	0.167461
ENST00000611699.1	chr22	228	1	903	609	27	222	NOL12	TGA	TGAG	14.5198	13.4308	0	0.72599	0.0160795	0.0220539	0	0.00327023	0.148283
ENST00000252288.7	chr19	46	-1	1121	678	71	327	GAMT	TGA	TGAG	5.08193	3.99295	0	1.08899	0.00453339	0.0058893	0	0.00333023	0.565471
ENST00000392622.3	chr1	1152	-1	547	264	153	85	S100A13	TAA	TAAA	19.6017	12.7048	4.35594	0	0.035835	0.0481244	0.0284702	0	0
ENST00000394957.8	chr10	284	-1	4714	903	75	3691	VSIR	TAG	TAGC	0.362995	0	0	0.362995	7.70036e-05	0	0	9.8346e-05	0
ENST00000620324.4	chr17	419	1	834	414	-1	376	ZNHIT3	TAG	TAGT	7.98589	6.53391	7.98589	0.362995	0.00957541	0.0157824	-7.98589	0.000965413	0.0611702
ENST00000314163.11	chr1	1024	1	1934	1335	138	416	GPR89B	TGA	TGAA	2.90396	0	0	2.90396	0.00150153	0	0	0.00698068	0
ENST00000329276.10	chr20	33	1	1913	1752	23	93	NOP56	TAG	TAGA	91.1118	89.6598	0	0	0.0476277	0.0511757	0	0	0
ENST00000338608.7	chr11	498	1	1532	1245	119	123	PPP1R32	TGA	TGAG	0.362995	0.362995	0	0	0.000236942	0.000291562	0	0	0
ENST00000219611.7	chr16	18	1	4888	3228	501	1114	CAPN15	TGA	TGAC	14.8828	5.80792	0.362995	7.6229	0.00304476	0.00179923	0.000724541	0.00684282	3.80319
ENST00000261038.6	chr3	589	1	3322	1404	118	1755	SLC49A4	TAA	TAAT	11.9788	2.54097	0	9.43787	0.00360591	0.0018098	0	0.00537771	2.97143
ENST00000266546.10	chr12	85	1	4185	2838	444	858	CLSTN3	TAA	TAAG	5.08193	2.54097	0	2.54097	0.00121432	0.000895337	0	0.0029615	3.30769
ENST00000414720.6	chr19	741	-1	2396	444	249	1658	ZNF780A	TGA	TGAA	13.0678	1.81498	0	11.2528	0.00545402	0.00408778	0	0.006787	1.66031
ENST00000278550.11	chr11	809	-1	14000	8277	457	5221	TENM4	TGA	TGAC	0.72599	0	0	0.72599	5.18564e-05	0	0	0.000139052	0
ENST00000220514.8	chr15	98	-1	1201	657	24	475	OIP5	TGA	TGAT	16.3348	9.80087	0.362995	5.08193	0.013601	0.0149176	0.0151248	0.0106988	0.717193
ENST00000372887.5	chr20	285	1	769	162	297	265	PKIG	TAG	TAGG	2.90396	1.08899	1.81498	0	0.00377628	0.00672213	0.00611103	0	0
ENST00000325285.8	chr9	660	-1	2362	1668	162	487	FBXW5	TGA	TGAG	11.2528	7.98589	0	3.26696	0.00476412	0.00478771	0	0.00670833	1.40116
ENST00000258873.9	chr15	395	-1	6215	2142	58	3970	ACSBG1	TAA	TAAT	0.72599	0.72599	0	0	0.000116813	0.000338931	0	0	0
ENST00000590853.5	chr19	382	-1	1101	342	179	535	PRKACA	TAA	TAAA	14.5198	5.44493	0.72599	8.34889	0.0131878	0.0159208	0.00405581	0.0156054	0.980187
ENST00000558134.5	chr15	446	-1	971	525	8	393	SEC11A	TGA	TGAT	151.006	105.632	0.362995	37.7515	0.155516	0.201203	0.0453744	0.0960598	0.477427
ENST00000300027.12	chr15	462	1	4713	3774	98	796	FANCI	TAA	TAAA	71.147	61.3462	0.72599	8.71188	0.0150959	0.0162549	0.00740806	0.0109446	0.673307
ENST00000265981.7	chr11	190	-1	4049	660	107	3237	RNF141	TGA	TGAC	59.5312	21.7797	3.26696	34.1215	0.0147027	0.0329996	0.0305323	0.0105411	0.319432
ENST00000585334.1	chr19	84	-1	774	564	93	72	DIRAS1	TGA	TGAG	0.362995	0.362995	0	0	0.000468986	0.000643608	0	0	0
ENST00000338005.6	chr9	654	1	1671	1572	29	25	CCDC183	TAG	TAGC	0.362995	0.362995	0	0	0.000217232	0.000230913	0	0	0
ENST00000333219.8	chr13	269	1	5119	807	866	3401	ING1	TAG	TAGT	13.4308	6.89691	0	6.53391	0.00262372	0.00854635	0	0.00192117	0.224795
ENST00000316626.5	chr3	559	-1	1636	1269	226	96	GSK3B	TGA	TGAA	62.0722	51.1823	7.98589	1.08899	0.0379414	0.0403328	0.0353358	0.0113436	0.28125
ENST00000332303.5	chr15	26	-1	4838	882	118	3793	NSMCE3	TGA	TGAA	7.98589	6.17092	0	1.81498	0.00165066	0.0069965	0	0.000478507	0.0683922
ENST00000567759.5	chr16	694	-1	3879	2577	177	1080	TAF1C	TGA	TGAG	6.53391	1.08899	0	5.44493	0.00168443	0.000422579	0	0.0050416	11.9306
ENST00000301788.12	chr11	535	1	791	486	63	197	POLR2G	TGA	TGAG	7.2599	5.08193	1.81498	0	0.00917813	0.0104566	0.0288091	0	0
ENST00000518074.5	chr8	237	1	2819	2598	165	11	SPIDR	TGA	TGAT	51.5453	50.0933	1.45198	0	0.018285	0.0192815	0.00879988	0	0
ENST00000391418.3	chr17	515	-1	875	354	58	418	KRTAP2-3	TGA	TGAG	0.362995	0	0	0.362995	0.000414852	0	0	0.000868409	0
ENST00000257663.4	chr7	344	-1	877	369	225	238	TMEM60	TGA	TGAC	9.07488	7.2599	1.45198	0.362995	0.0103476	0.0196745	0.00645325	0.00152519	0.077521
ENST00000396782.2	chr14	116	1	1627	1026	326	230	LTB4R	TAG	TAGG	0.362995	0.362995	0	0	0.000223107	0.000353796	0	0	0
ENST00000376004.5	chr13	252	-1	2029	1476	300	208	KDELC1	TGA	TGAT	5.08193	5.08193	0	0	0.00250465	0.00344304	0	0	0
ENST00000504087.6	chr4	504	-1	8798	4257	1032	3464	ANKRD50	TAA	TAAA	55.9012	28.6766	1.81498	25.4097	0.00635386	0.00673634	0.0017587	0.00733535	1.08892
ENST00000610724.4	chr7	295	-1	2165	1308	5	807	TBL2	TGA	TGAG	19.2387	5.08193	0	14.1568	0.00888625	0.00388527	0	0.0175425	4.51514
ENST00000354366.8	chr14	424	-1	14008	3462	31	10470	NRDE2	TAG	TAGA	16.6978	6.53391	0	10.1639	0.00119202	0.00188732	0	0.000970761	0.514358
ENST00000339397.4	chr5	361	1	2855	1257	66	1487	SRFBP1	TGA	TGAT	34.1215	23.5947	1.45198	8.34889	0.0119515	0.0187706	0.0219997	0.00561458	0.299115
ENST00000314607.10	chr1	446	1	6994	4614	74	2261	ZMYM4	TAA	TAAA	157.177	107.084	0	49.3673	0.0224731	0.0232084	0	0.0218343	0.940793
ENST00000374139.6	chr10	199	-1	2738	759	5	1929	DRGX	TGA	TGAG	0.362995	0	0	0.362995	0.000132577	0	0	0.000188178	0
ENST00000367679.6	chr1	1435	1	2766	654	442	1625	CACYBP	TGA	TGAG	101.276	68.9691	7.98589	21.4167	0.0366145	0.105457	0.0180676	0.0131795	0.124975
ENST00000409757.9	chr4	72	1	4947	2049	137	2716	TBC1D14	TGA	TGAG	96.9197	39.2035	1.08899	56.2642	0.0195916	0.019133	0.0079488	0.0207158	1.08273
ENST00000295148.9	chr2	75	-1	3848	2133	90	1580	WDCP	TGA	TGAT	24.3207	8.71188	0.72599	14.1568	0.00632034	0.00408433	0.00806656	0.00896001	2.19375
ENST00000301396.8	chr17	69	-1	3673	3510	70	48	PELP1	TAG	TAGC	10.8899	10.8899	0	0	0.00296484	0.00310252	0	0	0
ENST00000366835.8	chr1	1721	-1	4109	2391	276	1397	TMEM63A	TGA	TGAG	5.80792	2.90396	0	2.90396	0.00141346	0.00121454	0	0.00207871	1.71152
ENST00000382599.9	chr4	64	-1	4450	1311	379	2715	PPP2R2C	TAG	TAGG	0.72599	0	0	0.72599	0.000163144	0	0	0.0002674	0
ENST00000366928.10	chr1	1684	1	1857	681	7	1124	LYPLAL1	TGA	TGAA	7.2599	6.53391	0	0.72599	0.00390948	0.00959458	0	0.000645899	0.0673191
ENST00000456909.6	chr2	1015	1	3618	3234	87	252	STK11IP	TGA	TGAG	1.08899	1.08899	0	0	0.000300991	0.00033673	0	0	0
ENST00000367419.10	chr6	828	1	1943	960	34	904	GINM1	TAA	TAAA	20.6907	13.0678	0	7.6229	0.0106489	0.0136123	0	0.00843241	0.619469
ENST00000269346.9	chr17	888	1	3433	1572	11	1805	TTYH2	TAA	TAAC	0.362995	0	0	0.362995	0.000105737	0	0	0.000201105	0
ENST00000322536.8	chr11	920	1	3217	2595	79	498	DDX10	TAA	TAAA	26.4986	21.0537	0.362995	5.08193	0.00823707	0.00811319	0.00459487	0.0102047	1.25779
ENST00000537169.1	chrX	429	1	3318	1107	450	1716	ARMCX3	TAA	TAAC	12.7048	5.80792	1.08899	5.44493	0.00382906	0.00524654	0.00241997	0.00317303	0.604786
ENST00000005558.8	chr7	564	1	1834	1323	464	2	IFRD1	TAG	TAGA	39.5665	38.1145	1.45198	0	0.0215739	0.0288091	0.00312927	0	0
ENST00000220669.10	chr8	350	-1	2184	774	13	1352	ZFAND1	TAG	TAGT	59.8942	34.1215	0.72599	22.8687	0.0274241	0.0440847	0.0558454	0.0169147	0.383687
ENST00000215793.13	chr22	151	-1	5090	2349	96	2600	SF3A1	TAG	TAGA	79.1329	46.1004	0.362995	30.8546	0.0155467	0.0196255	0.0037812	0.0118671	0.604679
ENST00000381153.7	chr11	63	-1	2956	366	246	2299	C11orf21	TGA	TGAG	0.72599	0	0	0.72599	0.000245599	0	0	0.000315785	0
ENST00000529691.1	chr11	1045	-1	3384	1914	214	1211	ZNF202	TAG	TAGC	3.62995	2.17797	0	1.45198	0.00107268	0.00113792	0	0.00119899	1.05367
ENST00000542749.5	chr12	886	-1	6660	4017	58	2540	PITPNM2	TAG	TAGG	17.0608	12.7048	0	4.35594	0.00256168	0.00316277	0	0.00171494	0.542227
ENST00000271002.14	chr1	700	-1	948	501	76	326	ITGB3BP	TGA	TGAG	4.71894	3.26696	0.362995	1.08899	0.00497778	0.00652087	0.00477625	0.00334045	0.51227
ENST00000056233.4	chr7	126	1	3740	2052	295	1348	NFE2L3	TGA	TGAG	67.5171	44.6484	0	20.6907	0.0180527	0.0217585	0	0.0153492	0.705435
ENST00000555220.5	chr14	283	-1	1440	228	728	439	ZBTB25	TAA	TAAG	6.17092	3.62995	0	2.54097	0.00428536	0.0159208	0	0.00578808	0.363554
ENST00000318753.13	chr22	102	-1	1233	915	28	245	LRRC75B	TGA	TGAC	0.362995	0.362995	0	0	0.0002944	0.000396716	0	0	0
ENST00000494751.5	chr6	309	-1	731	375	242	69	CUTA	TGA	TGAA	11.6158	9.80087	1.45198	0	0.0158903	0.0261356	0.00599992	0	0
ENST00000357115.8	chr4	566	-1	10129	8559	468	1057	LRBA	TGA	TGAT	66.7911	51.9083	0	13.0678	0.00659405	0.00606476	0	0.0123631	2.03852
ENST00000266673.9	chr12	594	1	5656	978	588	4045	TMEM19	TGA	TGAA	31.2176	10.5269	1.08899	19.6017	0.00551937	0.0107637	0.00185202	0.00484592	0.450211
ENST00000398316.7	chr13	149	1	5714	3396	81	2192	FNDC3A	TGA	TGAA	255.912	173.512	5.08193	75.866	0.0447868	0.051093	0.0627399	0.0346104	0.677401
ENST00000344099.4	chr19	522	-1	2963	1896	148	874	ZNF14	TAA	TAAG	1.81498	0.72599	0	1.08899	0.000612547	0.000382906	0	0.00124598	3.254
ENST00000337343.8	chr13	112	1	4246	3630	15	556	DGKH	TAA	TAAT	47.1894	36.2995	0	10.5269	0.0111138	0.00999987	0	0.0189332	1.89335
ENST00000506447.5	chr18	52	1	7960	7581	74	260	CEP192	TAA	TAAC	76.229	75.866	0	0	0.0095765	0.0100074	0	0	0
ENST00000361711.7	chr16	689	1	2230	1401	466	318	OSGIN1	TAA	TAAC	0.362995	0.362995	0	0	0.000162778	0.000259097	0	0	0
ENST00000614261.4	chr2	1062	1	4975	2424	152	2354	ARMC9	TAA	TAAG	5.80792	4.35594	0	1.45198	0.00116742	0.00179701	0	0.000616814	0.343246
ENST00000551649.5	chr19	464	-1	6052	5136	144	727	UNC13A	TAG	TAGC	255.912	220.338	1.45198	32.6696	0.0422855	0.0429007	0.0100832	0.0449375	1.04748
ENST00000557894.5	chr14	104	1	1391	1029	186	131	IRF9	TAG	TAGA	1.45198	0.72599	0.72599	0	0.00104384	0.00070553	0.00390317	0	0
ENST00000393852.8	chr2	406	1	2332	1113	394	780	ELMOD3	TGA	TGAC	1.45198	1.08899	0	0.362995	0.000622633	0.000978423	0	0.000465378	0.475641
ENST00000531165.5	chr11	360	-1	3650	1512	273	1820	CELF1	TGA	TGAG	95.4677	39.2035	3.26696	51.1823	0.0261555	0.0259282	0.0119669	0.0281221	1.08462
ENST00000476842.1	chr3	358	1	522	147	145	185	SMIM4	TGA	TGAC	1.45198	0.72599	0.72599	0	0.00278157	0.00493871	0.00500683	0	0
ENST00000327490.8	chr17	951	1	1446	462	152	787	UBALD2	TGA	TGAG	26.8616	10.5269	0	15.9718	0.0185765	0.0227854	0	0.0202945	0.89068
ENST00000393567.7	chr16	624	-1	21046	15333	178	5490	HYDIN	TAG	TAGT	0.72599	0.72599	0	0	3.44954e-05	4.73482e-05	0	0	0
ENST00000389156.9	chr5	228	-1	6118	1980	213	3880	FAM169A	TGA	TGAA	52.6343	25.7727	0	26.8616	0.00860319	0.0130165	0	0.0069231	0.531872
ENST00000542587.5	chr19	518	-1	2546	1023	897	581	LPAR2	TAG	TAGC	1.08899	0	0	1.08899	0.000427724	0	0	0.00187433	0
ENST00000215912.9	chr22	171	-1	2467	759	178	1485	PIK3IP1	TGA	TGAG	0.362995	0	0	0.362995	0.00014714	0	0	0.000244441	0
ENST00000337392.10	chr19	868	1	2470	1977	10	438	CLPTM1	TAG	TAGT	19.6017	18.1498	0	1.45198	0.00793593	0.00918045	0	0.00331502	0.361096
ENST00000392793.5	chr11	1033	1	7426	6435	265	681	TECTA	TAA	TAAT	2.54097	1.81498	0	0.72599	0.000342172	0.000282047	0	0.00106606	3.77974
ENST00000524913.3	chr14	372	1	3923	1338	122	2418	ZC2HC1C	TAG	TAGA	0.72599	0.362995	0	0.362995	0.00018506	0.000271297	0	0.000150122	0.55335
ENST00000539286.5	chr7	421	1	699	264	123	267	BRI3	TGA	TGAT	30.8546	30.4916	0	0.362995	0.044141	0.115498	0	0.00135953	0.011771
ENST00000305242.9	chr10	118	-1	3572	3102	87	338	ARMC4	TGA	TGAA	1.45198	1.45198	0	0	0.000406489	0.000468079	0	0	0
ENST00000643390.1	chr1	752	1	1873	1479	116	233	MIGA1	TAA	TAAA	12.7048	11.9788	0.362995	0.362995	0.00678314	0.00809928	0.00312927	0.00155792	0.192353
ENST00000258436.10	chr2	517	-1	5293	1392	72	3784	MFSD9	TAG	TAGA	10.5269	2.90396	0	7.6229	0.00198883	0.00208618	0	0.00201451	0.965645
ENST00000647468.2	chr6	866	-1	3936	1932	118	1841	SERAC1	TAA	TAAC	2.17797	0.72599	0	1.45198	0.000553346	0.000375771	0	0.000788691	2.09886
ENST00000338560.12	chr17	242	1	2779	2262	364	108	TRPV2	TGA	TGAT	5.08193	5.08193	0	0	0.00182869	0.00224665	0	0	0
ENST00000395769.6	chr10	167	-1	1848	843	233	727	2020-03-08	TGA	TGAT	11.6158	7.6229	0.362995	3.62995	0.00628563	0.00904258	0.00155792	0.00499306	0.552171
ENST00000532090.2	chr11	625	-1	4811	2604	205	1957	AP5B1	TGA	TGAG	7.98589	1.08899	0	6.53391	0.00165992	0.000418197	0	0.00333874	7.98365
ENST00000578049.3	chr1	986	-1	6922	615	128	6134	SEC22B	TGA	TGAA	42.4704	16.6978	3.99295	19.6017	0.00613557	0.0271509	0.0311949	0.00319559	0.117698
ENST00000330889.8	chr17	357	1	2669	1113	64	1447	ADAP2	TGA	TGAC	1.45198	0.362995	0	1.08899	0.000544017	0.000326141	0	0.000752581	2.30753
ENST00000348459.10	chr10	419	1	3128	2484	128	471	HELLS	TAA	TAAA	145.561	124.144	2.90396	17.7868	0.0465349	0.0499776	0.0226872	0.0377638	0.755615
ENST00000512111.1	chr4	366	-1	3245	1830	379	991	KLHL8	TGA	TGAT	25.7727	15.9718	2.17797	7.2599	0.00794227	0.00872775	0.00574662	0.00732583	0.839373
ENST00000306627.7	chr3	102	1	1511	549	213	704	UBE2E1	TAA	TAAA	82.7629	50.0933	1.45198	26.8616	0.0547736	0.0912447	0.00681681	0.0381557	0.418169
ENST00000313732.8	chr16	704	-1	3442	894	347	2156	ZDHHC7	TGA	TGAG	79.1329	23.5947	3.62995	51.1823	0.0229904	0.0263923	0.010461	0.0237395	0.899486
ENST00000381309.7	chr9	38	1	4655	3138	559	913	KDM4C	TAG	TAGT	9.43787	7.2599	1.08899	1.08899	0.00202747	0.00231354	0.0019481	0.00119276	0.515553
ENST00000394287.7	chr17	462	-1	2870	1638	200	987	MED1	TGA	TGAA	56.6272	23.9577	1.08899	30.1286	0.0197307	0.0146262	0.00544493	0.0305254	2.08704
ENST00000374847.5	chr9	365	-1	4223	1179	295	2704	TMEM246	TAG	TAGG	45.0114	7.98589	0.362995	35.9365	0.0106586	0.00677345	0.00123049	0.0132901	1.96209
ENST00000376936.9	chr1	129	-1	2796	2625	32	94	EXOSC10	TAG	TAGT	30.8546	30.8546	0	0	0.0110353	0.0117541	0	0	0
ENST00000401525.7	chr7	37	1	2112	1278	218	571	WIPI2	TGA	TGAA	65.7021	49.0043	0	15.6088	0.031109	0.0383446	0	0.0273359	0.712901
ENST00000512960.5	chr4	514	1	3000	2496	393	66	JADE1	TGA	TGAT	33.3956	31.2176	0	2.17797	0.0111319	0.012507	0	0.0329996	2.63848
ENST00000252329.3	chr7	18	-1	1007	336	547	79	PSMG3	TGA	TGAC	11.9788	6.89691	1.45198	2.17797	0.0118956	0.0205265	0.00265444	0.0275692	1.3431
ENST00000264639.9	chr17	477	1	2147	1572	158	372	PSMD3	TGA	TGAG	21.7797	16.3348	0	5.44493	0.0101443	0.0103911	0	0.0146369	1.4086
ENST00000262367.9	chr16	149	-1	10803	7296	804	2658	CREBBP	TAG	TAGC	106.358	78.7699	0.362995	27.2246	0.00984519	0.0107963	0.000451486	0.0102425	0.948705
ENST00000606117.1	chr6	63	1	3922	900	290	2687	SIRT5	TAA	TAAG	7.2599	3.26696	2.17797	1.81498	0.00185107	0.00362995	0.00751024	0.000675465	0.186081
ENST00000356413.5	chrX	321	1	1682	987	313	337	IGBP1	TGA	TGAT	19.9647	17.7868	1.08899	0.362995	0.0118696	0.018021	0.00347919	0.00107714	0.0597711
ENST00000373547.8	chr9	483	-1	4118	885	94	3094	PPP6C	TGA	TGAG	69.3321	34.4845	1.81498	32.6696	0.0168363	0.0389656	0.0193083	0.010559	0.270983
ENST00000321867.6	chr12	923	1	5322	3120	374	1783	ULK1	TGA	TGAC	3.62995	0	0	3.62995	0.000682065	0	0	0.00203587	0
ENST00000528880.2	chr12	877	-1	2137	1131	149	812	HCAR3	TAA	TAAT	0.72599	0.72599	0	0	0.000339724	0.000641901	0	0	0
ENST00000309971.8	chr9	531	1	3321	2064	100	1112	GLE1	TGA	TGAT	34.1215	12.3418	0.72599	21.0537	0.0102745	0.00597957	0.0072599	0.0189332	3.16631
ENST00000333090.5	chr11	791	1	2585	1029	51	1460	TSKU	TGA	TGAC	13.7938	4.71894	0	9.07488	0.0053361	0.00458594	0	0.00621567	1.35537
ENST00000262525.6	chr16	390	-1	6083	2577	205	3256	ZNF629	TGA	TGAA	68.9691	9.07488	0	59.8942	0.011338	0.00352149	0	0.018395	5.22365
ENST00000392568.7	chr14	543	-1	854	636	97	76	NUDT14	TGA	TGAG	1.81498	1.81498	0	0	0.00212526	0.00285374	0	0	0
ENST00000454497.6	chr4	549	-1	7069	3117	132	3775	OTUD4	TGA	TGAT	128.863	50.8193	0.72599	75.503	0.0182293	0.0163039	0.00549993	0.0200008	1.22675
ENST00000394894.8	chr5	453	1	3095	2640	106	304	KIF20A	TAA	TAAG	121.966	112.891	0.72599	7.2599	0.0394075	0.0427619	0.00684896	0.0238813	0.55847
ENST00000376958.5	chr13	218	1	8884	1290	65	7484	GPR180	TGA	TGAT	142.657	31.5806	0	111.077	0.0160578	0.0244811	0	0.0148419	0.606259
ENST00000433688.2	chr11	557	-1	5716	2004	147	3520	C11orf95	TAG	TAGC	61.7092	0.362995	0	61.3462	0.0107959	0.000181135	0	0.0174279	96.2148
ENST00000350669.5	chr12	207	-1	1303	972	92	194	LDHB	TGA	TGAC	402.925	351.016	33.3956	9.80087	0.309228	0.361128	0.362995	0.0505199	0.139895
ENST00000491606.5	chr3	361	-1	1577	1083	113	336	GLT8D1	TGA	TGAA	15.2458	11.6158	0	2.17797	0.00966759	0.0107256	0	0.00648206	0.604353
ENST00000337288.9	chr2	456	-1	3368	1080	378	1865	STARD7	TGA	TGAC	415.992	87.8448	2.17797	322.703	0.123513	0.0813378	0.00576183	0.173031	2.12731
ENST00000341541.8	chr11	1128	-1	1304	645	464	150	THYN1	TAA	TAAC	18.5128	15.2458	2.90396	0	0.0141969	0.0236369	0.00625854	0	0
ENST00000313115.11	chr5	599	-1	471	174	74	178	ATOX1	TAG	TAGC	38.8405	18.8757	6.89691	7.2599	0.0824639	0.108481	0.0932014	0.040786	0.375972
ENST00000279068.11	chr20	420	1	2576	1125	186	1220	LSM14B	TGA	TGAG	18.8757	13.7938	0	5.08193	0.00732754	0.0122612	0	0.00416552	0.339733
ENST00000323116.10	chr3	855	1	7315	3501	250	3519	ATP11B	TAA	TAAA	259.179	126.685	0.72599	128.137	0.0354311	0.0361855	0.00290396	0.036413	1.00629
ENST00000434013.6	chr14	360	-1	875	573	27	230	NPC2	TAG	TAGC	25.7727	23.2317	0.72599	0	0.0294545	0.040544	0.0268885	0	0
ENST00000361055.9	chr3	425	-1	2111	1359	6	701	UBA3	TAA	TAAG	44.6484	35.2105	1.08899	6.17092	0.0211504	0.0259091	0.181498	0.00880302	0.339765
ENST00000367943.4	chr1	1347	1	1270	990	26	209	DUSP12	TGA	TGAA	12.3418	11.9788	0	0.362995	0.00971798	0.0120998	0	0.00173682	0.143541
ENST00000314328.14	chr22	97	1	6763	3321	288	3109	SPECC1L	TGA	TGAG	75.503	34.4845	0.362995	39.5665	0.0111641	0.0103838	0.0012604	0.0127264	1.22561
ENST00000358527.6	chr1	510	1	1892	1089	394	364	EXO5	TGA	TGAA	3.62995	2.17797	0	1.45198	0.00191858	0.00199997	0	0.00398896	1.99451
ENST00000397801.6	chr11	1076	1	4528	4128	140	215	ROBO3	TGA	TGAC	0.72599	0.72599	0	0	0.000160334	0.00017587	0	0	0
ENST00000371142.9	chr10	437	-1	6100	1737	171	4147	TM9SF3	TAG	TAGA	381.508	138.301	0	235.584	0.0625423	0.0796207	0	0.0568083	0.713486
ENST00000389017.5	chr17	182	-1	2575	1041	761	728	BORCS6	TGA	TGAC	1.08899	0.72599	0	0.362995	0.000422907	0.000697397	0	0.00049862	0.714973
ENST00000361507.5	chr11	807	-1	6110	1998	94	3973	GAB2	TGA	TGAT	18.8757	2.54097	0	16.3348	0.00308932	0.00127175	0	0.00411145	3.23289
ENST00000295500.8	chr2	775	-1	3930	2580	339	966	GPR155	TAA	TAAA	1.45198	1.08899	0.362995	0	0.000369461	0.000422087	0.00107078	0	0
ENST00000362034.7	chr11	708	-1	693	585	16	47	MRPL21	TGA	TGAT	39.5665	38.4775	0.362995	0	0.0570945	0.0657735	0.0226872	0	0
ENST00000581322.6	chr17	860	1	6241	966	868	4362	PITPNC1	TAA	TAAC	15.9718	10.5269	2.54097	2.90396	0.00255917	0.0108974	0.00292738	0.000665741	0.0610919
[truncated: 9,857 more rows]

## Sheet: Calu6_Untr_RNAseq_rep2
#transcript	chrom	featnum	strand	mrnalen	cdslen	utr5len	utr3len	gene_name	stopcodon	stop4nt	mrnaCounts	cdsCounts	utr5Counts	utr3Counts	mrnaDensity	cdsDensity	utr5Density	utr3Density	utr3_occupancy
ENST00000222803.9	chr7	149	-1	4960	603	170	4142	FKBP14	TAG	TAGA	55.3875	4.46673	2.68004	48.2407	0.0111668	0.00740752	0.0157649	0.0116467	1.57228
ENST00000216962.9	chr20	150	1	4116	2499	88	1484	PYGB	TAG	TAGG	34.8405	12.0602	0	22.3337	0.00846465	0.004826	0	0.0150496	3.11845
ENST00000381352.7	chr12	221	1	2320	1146	316	813	RASSF8	TAG	TAGA	234.503	202.79	25.0137	0.893346	0.101079	0.176954	0.0791573	0.00109883	0.00620967
ENST00000561312.5	chr15	418	-1	2938	672	31	2190	MESD	TGA	TGAT	16.9736	10.7202	0	6.25343	0.00577726	0.0159526	0	0.00285545	0.178995
ENST00000587340.5	chr19	1214	-1	2450	1458	690	257	ZSCAN5A	TGA	TGAT	7.14677	6.25343	0	0.893346	0.00291705	0.00428904	0	0.00347606	0.81045
ENST00000025301.4	chr13	113	1	9915	5673	170	4027	AKAP11	TAG	TAGA	64.7676	44.2207	0.446673	20.1003	0.00653229	0.00779493	0.00262749	0.00499138	0.640337
ENST00000451882.3	chr18	240	1	689	192	87	365	HSBP1L1	TAA	TAAC	4.91341	0.893346	0	3.57339	0.00713121	0.00465285	0	0.0097901	2.10411
ENST00000222982.8	chr7	439	-1	1720	1476	94	105	CYP3A5	TGA	TGAG	0.446673	0	0.446673	0	0.000259694	0	0.00475184	0	0
ENST00000395422.4	chr7	255	-1	797	423	57	272	CHCHD2	TAA	TAAT	180.903	81.7412	7.59345	75.4878	0.22698	0.193242	0.133218	0.277529	1.43617
ENST00000574232.5	chr17	105	1	2129	1695	346	43	WSCD1	TGA	TGAT	8.48679	5.80675	1.78669	0.893346	0.00398628	0.00342581	0.00516385	0.0207755	6.0644
ENST00000438911.6	chr8	599	-1	2020	1056	128	791	CYHR1	TAG	TAGG	0.446673	0	0	0.446673	0.000221125	0	0	0.000564694	0
ENST00000370873.9	chr20	421	-1	962	714	85	118	PSMA7	TGA	TGAT	102.288	100.055	1.78669	0	0.106329	0.140133	0.0210199	0	0
ENST00000614428.4	chr17	427	-1	9554	7008	185	2316	ACACA	TAG	TAGG	196.536	91.1213	2.23337	102.735	0.0205711	0.0130025	0.0120722	0.0443587	3.41156
ENST00000322954.11	chr15	314	-1	6904	4218	145	2496	UACA	TAG	TAGC	159.016	138.469	0	19.6536	0.0230324	0.032828	0	0.00787405	0.239857
ENST00000265849.12	chr7	47	-1	5093	2556	24	2468	PMS2	TGA	TGAC	27.2471	21.887	0	5.36008	0.00534991	0.00856298	0	0.00217183	0.25363
ENST00000371698.3	chr9	646	1	1282	789	62	386	EGFL7	TGA	TGAC	4.91341	3.57339	0.446673	0.893346	0.00383261	0.00452901	0.00720441	0.00231437	0.51101
ENST00000403263.6	chr2	909	-1	14128	3051	391	10641	INO80D	TGA	TGAG	153.209	12.5069	1.78669	138.469	0.0108443	0.00409926	0.00456955	0.0130128	3.17441
ENST00000329021.9	chr22	309	-1	5602	780	32	4745	NFAM1	TAG	TAGG	0.446673	0	0	0.446673	7.97346e-05	0	0	9.41356e-05	0
ENST00000397666.6	chr16	22	-1	726	585	6	90	METTL26	TAG	TAGG	9.82681	9.38014	0	0.446673	0.0135356	0.0160344	0	0.00496304	0.309524
ENST00000474627.8	chr17	260	-1	1553	837	149	522	ATPAF2	TGA	TGAG	2.68004	1.78669	0.446673	0.446673	0.00172572	0.00213464	0.00299781	0.000855696	0.400862
ENST00000335263.9	chr14	503	1	2616	1713	74	784	WDR20	TAG	TAGC	15.1869	13.8469	0	0.893346	0.00580539	0.0080834	0	0.00113947	0.140964
ENST00000484457.5	chr3	134	1	3847	1239	85	2478	FBXL2	TGA	TGAC	18.7603	9.82681	0	8.04012	0.0048766	0.00793124	0	0.0032446	0.409091
ENST00000328333.12	chr3	264	-1	9276	8802	102	327	COL7A1	TGA	TGAG	16.9736	16.0802	0	0.893346	0.00182984	0.00182688	0	0.00273195	1.49541
ENST00000619929.5	chr17	650	-1	6132	2337	99	3651	PLCD3	TGA	TGAG	42.434	22.3337	0	20.1003	0.00692008	0.00955655	0	0.00550542	0.576089
ENST00000371937.8	chr1	602	-1	1827	1023	30	729	ATPAF1	TAG	TAGA	9.38014	4.02006	0	5.36008	0.00513418	0.00392968	0	0.00735265	1.87106
ENST00000288532.11	chr12	841	-1	1506	951	11	499	COQ5	TAA	TAAT	16.0802	8.93346	0	5.80675	0.0106774	0.00939376	0	0.0116368	1.23878
ENST00000389629.8	chr15	101	1	5021	2100	6	2870	RTF1	TGA	TGAG	77.7211	35.2872	0	42.434	0.0154792	0.0168034	0	0.0147854	0.879901
ENST00000265260.7	chr3	486	1	2342	504	115	1678	PCNP	TAA	TAAA	252.37	108.095	4.91341	128.642	0.107758	0.214474	0.0427253	0.0766638	0.35745
ENST00000263093.7	chr19	1277	-1	2292	2040	31	176	SLC27A5	TGA	TGAT	1.78669	0.446673	0	0.446673	0.000779534	0.000218957	0	0.00253792	11.5909
ENST00000305784.7	chr2	1145	-1	1051	606	26	374	DTYMK	TGA	TGAC	61.1942	38.8606	0.446673	18.3136	0.0582248	0.0641264	0.0171797	0.0489669	0.763599
ENST00000426362.6	chr16	638	-1	965	417	269	234	TXNL4B	TAG	TAGT	5.36008	2.68004	0.446673	2.23337	0.00555449	0.00642695	0.0016605	0.0095443	1.48504
ENST00000621441.5	chr14	240	-1	10486	2094	251	8096	EXOC5	TGA	TGAG	236.737	79.9545	1.34002	147.849	0.0225765	0.0381827	0.00533872	0.018262	0.478279
ENST00000307767.13	chr17	276	1	1876	585	105	1141	TVP23B	TGA	TGAA	21.887	11.6135	0	9.82681	0.0116668	0.0198521	0	0.00861246	0.43383
ENST00000421999.8	chr3	473	1	4302	807	112	3338	CMSS1	TAA	TAAG	47.3474	37.9672	4.91341	3.12671	0.0110059	0.0470474	0.0438697	0.000936702	0.0199098
ENST00000336498.7	chr4	562	1	3299	2328	233	693	ARHGAP10	TAG	TAGC	9.82681	8.93346	0	0.893346	0.00297872	0.0038374	0	0.0012891	0.335931
ENST00000251089.6	chr14	384	-1	5176	1980	107	3044	ANGEL1	TGA	TGAC	15.1869	2.23337	0	12.5069	0.0029341	0.00112796	0	0.00410869	3.64258
ENST00000265000.9	chr4	640	1	4249	1941	19	2244	GALNT7	TAG	TAGA	116.135	46.9007	0	68.341	0.0273323	0.0241632	0	0.030455	1.26039
ENST00000320152.11	chr10	103	-1	1939	645	25	1224	PRTFDC1	TAA	TAAA	251.477	103.628	2.23337	136.682	0.129694	0.160664	0.0893346	0.111668	0.695043
ENST00000371703.7	chr10	393	1	2589	774	265	1505	RPP30	TGA	TGAA	25.907	18.7603	0.446673	6.7001	0.0100066	0.0242381	0.00168556	0.00445189	0.183673
ENST00000371927.7	chr10	379	1	4184	1353	952	1834	STAMBPL1	TGA	TGAG	64.7676	55.3875	8.48679	0.446673	0.0154798	0.0409368	0.0089147	0.000243551	0.00594945
ENST00000302764.9	chr5	650	-1	7967	441	46	7435	NUDCD2	TAA	TAAC	25.4604	21.887	0.893346	1.78669	0.00319573	0.0496304	0.0194206	0.000240308	0.00484196
ENST00000359316.6	chr1	1693	1	1335	741	257	292	2020-03-02	TGA	TGAC	0.446673	0	0	0.446673	0.000334587	0	0	0.0015297	0
ENST00000359644.7	chr3	653	1	3401	2817	123	416	ATP2C1	TAA	TAAG	100.948	97.8214	1.34002	0.893346	0.0296819	0.0347254	0.0108945	0.00214747	0.0618414
ENST00000355841.7	chr5	727	-1	1712	1341	82	244	PDLIM7	TGA	TGAG	8.48679	7.59345	0.446673	0.446673	0.00495724	0.00566252	0.00544723	0.00183063	0.323288
ENST00000367888.8	chr1	1366	1	778	357	82	294	MGST3	TAA	TAAA	20.1003	13.4002	4.91341	0	0.0258359	0.0375356	0.0599196	0	0
ENST00000241600.10	chr9	623	1	1458	858	23	532	MRPS2	TGA	TGAT	36.6272	12.9535	0	22.3337	0.0251215	0.0150973	0	0.0419806	2.78066
ENST00000296499.6	chr4	474	1	5806	2589	256	2916	NDST3	TAG	TAGC	0.446673	0.446673	0	0	7.6933e-05	0.000172527	0	0	0
ENST00000376834.8	chr9	242	-1	4259	1197	46	2971	CARNMT1	TAA	TAAT	74.5944	25.0137	0	47.794	0.0175145	0.020897	0	0.0160869	0.769817
ENST00000359128.10	chr16	145	-1	6413	3165	417	2786	NLRC3	TGA	TGAT	1.34002	0	0	1.34002	0.000208954	0	0	0.000480983	0
ENST00000315757.9	chr15	305	-1	10191	3534	91	6521	ITGA11	TGA	TGAG	5.80675	1.78669	0	3.57339	0.000569792	0.000505572	0	0.000547981	1.08388
ENST00000596362.1	chr19	915	1	1203	417	130	611	CALM3	TGA	TGAA	149.636	78.6145	0	65.2143	0.124385	0.188524	0	0.106734	0.566155
ENST00000369851.6	chr1	888	1	27173	1032	100	25996	GNAI3	TGA	TGAG	198.77	41.5406	2.68004	150.082	0.00731497	0.0402525	0.0268004	0.00577328	0.143427
ENST00000434353.6	chrX	668	1	1524	408	561	510	CXorf40A	TAG	TAGA	0.893346	0.893346	0	0	0.000586185	0.00218957	0	0	0
ENST00000374987.4	chrX	278	1	3239	1524	54	1616	APEX2	TGA	TGAA	6.7001	3.57339	0	3.12671	0.00206857	0.00234474	0	0.00193485	0.825186
ENST00000357495.4	chr13	174	1	1372	930	62	335	HNRNPA1L2	TAA	TAAT	12.5069	7.59345	2.23337	0.893346	0.00911578	0.00816499	0.036022	0.00266671	0.326602
ENST00000318158.11	chr9	184	1	1250	954	49	202	GRHPR	TAG	TAGC	39.3072	29.4804	1.78669	5.80675	0.0314458	0.0309019	0.0364631	0.0287463	0.930243
ENST00000614681.1	chr2	583	1	1347	684	133	485	INSIG2	TGA	TGAA	9.82681	5.36008	0	4.46673	0.00729533	0.00783637	0	0.00920976	1.17526
ENST00000328434.8	chr17	592	-1	780	288	17	430	COA3	TAA	TAAT	12.0602	3.12671	0	6.7001	0.0154618	0.0108566	0	0.0155816	1.43522
ENST00000225983.10	chr17	624	-1	5326	3339	318	1624	HDAC5	TGA	TGAC	18.3136	18.3136	0	0	0.00343853	0.00548476	0	0	0
ENST00000280357.12	chr11	943	-1	1115	549	191	330	IL18	TAG	TAGC	0.446673	0	0	0.446673	0.000400604	0	0	0.00135356	0
ENST00000596049.5	chr19	1006	-1	992	840	100	7	PIH1D1	TGA	TGAT	20.1003	18.7603	0	0	0.0202624	0.0223337	0	0	0
ENST00000505916.5	chr4	677	-1	2302	1011	1136	110	LRP2BP	TAG	TAGA	0.893346	0.893346	0	0	0.000388074	0.000883627	0	0	0
ENST00000313552.10	chr2	1146	1	5196	690	20	4441	ING5	TAG	TAGG	19.6536	1.78669	0	17.4203	0.00378245	0.00258941	0	0.0039226	1.51486
ENST00000558966.5	chr15	148	1	1895	1368	119	363	CTDSPL2	TAA	TAAG	171.076	150.529	2.68004	10.7202	0.0902775	0.110036	0.0225213	0.0295321	0.268387
ENST00000359263.9	chr10	409	-1	6860	6153	134	528	MYOF	TAA	TAAC	322.945	282.297	1.78669	31.2671	0.0470765	0.0458797	0.0133335	0.059218	1.29073
ENST00000285930.9	chr7	659	-1	1361	918	32	366	AKR1B1	TGA	TGAA	44.2207	24.567	0	18.7603	0.0324913	0.0267615	0	0.0512576	1.91535
ENST00000261296.7	chr13	217	-1	1797	1020	10	722	TGDS	TAA	TAAT	55.3875	37.5206	0.446673	16.0802	0.0308222	0.0367849	0.0446673	0.0222718	0.605461
ENST00000292577.11	chr19	62	-1	1757	900	428	384	ABHD17A	TAG	TAGC	20.9936	18.3136	0.446673	2.23337	0.0119486	0.0203484	0.00104363	0.00581606	0.285823
ENST00000321407.3	chr7	611	-1	4128	2295	408	1380	GCC1	TGA	TGAT	8.04012	3.12671	0	4.91341	0.0019477	0.0013624	0	0.00356044	2.61335
ENST00000413459.7	chr16	103	1	2049	1752	63	189	AMDHD2	TGA	TGAG	3.57339	3.57339	0	0	0.00174397	0.0020396	0	0	0
ENST00000270357.10	chr2	1126	1	5761	2145	97	3474	RNPEPL1	TAG	TAGC	18.3136	7.14677	0	11.1668	0.00317889	0.00333183	0	0.0032144	0.964756
ENST00000367287.5	chr1	1553	1	1650	483	18	1104	TIMM17A	TAG	TAGG	72.3611	32.1605	2.23337	33.5005	0.0438552	0.0665848	0.124076	0.0303446	0.455729
ENST00000388996.10	chr8	512	-1	11583	2586	557	8395	KCNQ3	TAA	TAAA	0.446673	0.446673	0	0	3.85628e-05	0.000172727	0	0	0
ENST00000261366.10	chr5	377	1	2890	1728	367	750	LMNB1	TAA	TAAA	146.955	114.795	4.02006	26.8004	0.0508497	0.0664323	0.0109538	0.0357339	0.537899
ENST00000628904.2	chr2	701	1	3856	3594	121	96	PKP4	TGA	TGAA	121.942	116.135	3.12671	1.34002	0.0316239	0.0323136	0.0258406	0.0139585	0.431971
ENST00000409806.7	chr6	826	-1	5791	1551	313	3882	ZC3H12D	TAA	TAAG	4.02006	0.446673	0	3.57339	0.000694191	0.00028799	0	0.000920501	3.19629
ENST00000262613.10	chr17	900	1	1993	1044	213	691	SLC9A3R1	TGA	TGAG	10.2735	1.78669	0	8.48679	0.00515478	0.00171139	0	0.0122819	7.17656
ENST00000264932.11	chr5	3	1	2693	1962	30	656	SDHA	TGA	TGAT	22.7803	19.6536	0	3.12671	0.00845909	0.0100171	0	0.00476633	0.475818
ENST00000621654.1	chr17	445	-1	3719	1107	920	1647	EPOP	TGA	TGAC	10.2735	0.893346	0	9.38014	0.00276243	0.000806998	0	0.00569529	7.05738
ENST00000354429.6	chr17	130	1	1304	918	101	240	ELP5	TGA	TGAC	10.2735	6.7001	0	3.57339	0.00787844	0.00729858	0	0.0148891	2.04
ENST00000396048.6	chr3	207	1	3099	783	431	1840	ZNF501	TAA	TAAA	4.91341	4.02006	0.446673	0.446673	0.00158548	0.00513418	0.00103636	0.000242757	0.0472826
ENST00000575403.5	chr17	283	-1	928	411	328	144	B9D1	TGA	TGAA	2.23337	2.23337	0	0	0.00240664	0.00543398	0	0	0
ENST00000253496.3	chr5	723	-1	2049	1815	43	146	F12	TGA	TGAT	0.446673	0	0	0	0.000217996	0	0	0	0
ENST00000287842.7	chr8	175	1	2035	1905	86	-1	NRG1	TAA	TAAA	0.446673	0.446673	0	0	0.000219495	0.000234474	0	0	0
ENST00000503569.5	chr4	63	1	3255	2640	161	409	WFS1	TGA	TGAG	1.78669	0.893346	0	0.893346	0.000548907	0.000338389	0	0.00218422	6.45477
ENST00000304430.9	chr4	501	-1	1169	918	28	178	NUDT6	TAA	TAAA	2.68004	2.68004	0	0	0.00229259	0.00291943	0	0	0
ENST00000485511.6	chr6	418	1	2973	1776	102	1050	PPP2R5D	TGA	TGAC	25.907	14.2935	0.446673	10.7202	0.00871411	0.00804817	0.00437915	0.0102097	1.26857
ENST00000480567.5	chr1	1218	-1	895	519	157	174	SSR2	TGA	TGAT	64.3209	42.434	0	16.5269	0.071867	0.081761	0	0.0949822	1.16171
ENST00000393860.7	chr17	568	-1	1912	618	450	799	RAB5C	TGA	TGAG	61.6409	33.9472	0.893346	24.1204	0.032239	0.0549307	0.00198521	0.0301882	0.549569
ENST00000256441.5	chr5	195	1	1315	279	64	927	MRPS36	TAA	TAAC	19.2069	14.7402	1.78669	0	0.014606	0.0528323	0.0279171	0	0
ENST00000641251.1	chr11	383	1	1058	897	23	93	OR4C6	TAA	TAAC	0.446673	0.446673	0	0	0.000422186	0.000497963	0	0	0
ENST00000327532.7	chr3	686	-1	3492	2271	356	820	DZIP1L	TGA	TGAT	5.36008	3.12671	0	2.23337	0.00153496	0.0013768	0	0.00272362	1.97822
ENST00000293599.7	chr12	338	1	1449	765	140	499	AQP5	TGA	TGAC	0.893346	0.893346	0	0	0.000616526	0.00116777	0	0	0
ENST00000305366.8	chr3	742	-1	1555	576	96	838	TM4SF1	TAA	TAAA	429.7	201.896	61.1942	155.889	0.276334	0.350514	0.63744	0.186025	0.53072
ENST00000380258.6	chr15	262	-1	911	165	67	634	PCLAF	TAA	TAAC	47.794	20.1003	12.5069	9.82681	0.0524633	0.12182	0.186669	0.0154997	0.127234
ENST00000392876.8	chr12	705	-1	7244	1614	72	5513	NT5DC3	TAG	TAGC	66.5543	5.80675	0	60.7476	0.00918751	0.00359774	0	0.011019	3.06275
ENST00000232888.7	chr3	337	-1	1542	1395	31	71	RRP9	TGA	TGAC	1.78669	1.78669	0	0	0.00115869	0.00128078	0	0	0
ENST00000428879.5	chr2	676	-1	1726	858	499	324	MMADHC	TAG	TAGC	92.4614	75.9345	6.25343	5.36008	0.0535697	0.0885017	0.0125319	0.0165435	0.186928
ENST00000415641.7	chr1	862	-1	2485	1884	198	358	NBPF4	TGA	TGAA	0.446673	0	0	0.446673	0.000179748	0	0	0.00124769	0
ENST00000314128.9	chr12	490	-1	4405	2523	51	1786	STAT2	TAG	TAGG	4.91341	1.34002	0	3.12671	0.00111542	0.000531122	0	0.00175068	3.29619
ENST00000396825.4	chr20	280	-1	4628	756	48	3779	FITM2	TAA	TAAA	25.0137	0.893346	0	24.1204	0.00540486	0.00118168	0	0.00638273	5.40143
ENST00000606937.5	chr5	379	-1	607	384	41	137	C5orf63	TGA	TGAA	1.34002	1.34002	0	0	0.00220761	0.00348963	0	0	0
ENST00000265038.9	chr5	170	-1	2017	1158	37	777	ERCC8	TGA	TGAA	8.93346	7.59345	0.446673	0.893346	0.00442909	0.00655738	0.0120722	0.00114974	0.175335
ENST00000371317.10	chrX	547	1	9577	513	130	8889	MCTS1	TGA	TGAG	16.9736	12.9535	1.78669	1.78669	0.00177233	0.0252505	0.0137438	0.000201	0.00796025
ENST00000301475.1	chr19	243	-1	3014	1176	224	1569	ZNF558	TGA	TGAA	12.0602	4.46673	0	7.59345	0.00400139	0.00379824	0	0.00483967	1.27419
ENST00000419304.7	chr7	88	-1	1697	495	66	1091	AGR2	TAA	TAAA	100.948	64.3209	20.547	10.2735	0.0594862	0.129941	0.311318	0.00941658	0.0724679
ENST00000456936.4	chr5	346	-1	3918	642	238	2993	TMED7	TAA	TAAC	94.2481	33.9472	2.68004	57.1742	0.0240551	0.0528772	0.0112607	0.0191026	0.361264
ENST00000322810.8	chr8	573	-1	15249	14022	164	1018	PLEC	TGA	TGAG	98.7148	86.2079	0	12.5069	0.00647353	0.00614805	0	0.0122857	1.99831
ENST00000302097.3	chr22	71	-1	2148	1596	247	260	ZNF280A	TGA	TGAA	1.78669	1.34002	0.446673	0	0.000831794	0.000839611	0.00180839	0	0
ENST00000474629.7	chr3	587	1	7694	5373	39	2237	PARP14	TAA	TAAC	54.0475	29.9271	0	24.1204	0.00702462	0.00556991	0	0.0107825	1.93584
ENST00000374198.4	chr9	414	1	2787	1536	96	1110	PRPF4	TAG	TAGA	68.341	29.9271	2.23337	33.0538	0.0245214	0.0194838	0.0232642	0.0297782	1.52836
ENST00000396056.7	chr3	205	1	2658	1551	224	838	ZNF35	TAA	TAAC	24.567	15.1869	0.446673	8.48679	0.00924267	0.00979168	0.00199408	0.0101274	1.03429
ENST00000219479.7	chr16	15	1	1000	531	18	406	NME4	TGA	TGAG	122.835	79.0612	0	34.8405	0.122835	0.148891	0	0.0858141	0.576355
ENST00000193322.8	chr6	653	-1	4471	972	84	3370	OSTM1	TGA	TGAG	50.0274	12.0602	0	37.5206	0.0111893	0.0124076	0	0.0111337	0.897329
ENST00000221856.11	chr19	132	1	1833	1458	143	187	FSD1	TAG	TAGG	1.78669	0.893346	0.446673	0.446673	0.000974737	0.00061272	0.00312359	0.00238863	3.8984
ENST00000631589.1	chr10	90	1	4955	3174	95	1641	MLLT10	TGA	TGAC	71.021	47.794	0	21.887	0.0143332	0.015058	0	0.0133376	0.885749
ENST00000373449.6	chr1	428	-1	3586	666	36	2839	AK2	TAG	TAGT	152.316	59.4075	4.46673	86.2079	0.0424751	0.0892005	0.124076	0.0303656	0.34042
ENST00000646620.1	chr15	486	-1	1309	507	406	351	HDDC3	TGA	TGAT	8.04012	4.02006	0	3.12671	0.00614218	0.00792911	0	0.00890801	1.12346
ENST00000263707.6	chr2	600	-1	9287	1407	87	7748	TFCP2L1	TGA	TGAG	3.12671	0	0	3.12671	0.000336676	0	0	0.000403551	0
ENST00000374878.5	chrX	300	-1	2217	1431	395	346	ARHGEF9	TAA	TAAG	4.91341	4.91341	0	0	0.00221624	0.00343355	0	0	0
ENST00000543824.5	chr12	111	1	4292	2982	326	939	PHC1	TAA	TAAG	33.5005	19.6536	1.34002	12.5069	0.00780533	0.00659075	0.00411049	0.0133193	2.02091
ENST00000581492.2	chr10	181	1	1955	1257	173	480	GDF2	TAG	TAGT	0.446673	0.446673	0	0	0.000228477	0.000355349	0	0	0
ENST00000613034.4	chr6	768	1	1625	528	599	453	TBPL1	TAA	TAAT	22.3337	17.8669	0.893346	3.12671	0.0137438	0.0338389	0.0014914	0.00690224	0.203974
ENST00000264156.3	chr2	657	-1	3753	2433	72	1203	MCM6	TGA	TGAG	62.5343	42.8806	0	16.5269	0.0166625	0.0176246	0	0.0137381	0.779484
ENST00000281950.8	chr2	195	1	3705	471	85	3104	GEMIN6	TGA	TGAG	25.907	12.5069	1.78669	11.1668	0.00699246	0.0265538	0.0210199	0.00359756	0.135482
ENST00000356392.9	chr19	309	-1	2123	1755	99	224	CCDC151	TAG	TAGA	0.446673	0	0.446673	0	0.000210397	0	0.00451185	0	0
ENST00000270221.11	chr19	953	1	649	459	68	77	EMP3	TGA	TGAG	32.1605	23.227	5.36008	0	0.0495539	0.0506035	0.0788247	0	0
ENST00000212015.11	chr10	242	1	4107	2211	60	1791	SIRT1	TAG	TAGT	28.1404	16.9736	0	10.7202	0.00685182	0.00767688	0	0.00598557	0.779688
ENST00000317506.8	chr16	574	-1	5245	1830	18	3352	RANBP10	TAG	TAGC	33.5005	5.36008	0	28.1404	0.00638713	0.002929	0	0.00839511	2.8662
ENST00000261700.8	chr14	210	1	7007	702	88	6172	RTRAF	TGA	TGAA	130.875	92.908	12.0602	9.38014	0.0186778	0.132348	0.137047	0.00151979	0.0114833
ENST00000403766.7	chr13	235	1	1375	1002	129	199	UBAC2	TGA	TGAT	66.5543	39.7539	1.78669	19.2069	0.0484031	0.0396746	0.0138503	0.0965173	2.43273
ENST00000249636.10	chr15	302	1	8115	1923	142	6005	PIAS1	TGA	TGAT	51.8141	23.227	0	27.6937	0.00638498	0.0120785	0	0.00461178	0.381816
ENST00000263150.8	chr10	7	1	4462	1452	145	2820	WDR37	TAA	TAAG	27.6937	8.04012	0	19.6536	0.00620658	0.00553727	0	0.00696937	1.25863
ENST00000319420.3	chr13	37	-1	2860	855	50	1910	SHISA2	TAA	TAAC	41.9873	11.6135	0	28.5871	0.0146809	0.013583	0	0.0149671	1.10189
ENST00000335255.10	chr17	1055	1	5243	1950	151	3097	FOXK2	TAG	TAGC	105.415	55.3875	0	49.1341	0.0201058	0.0284038	0	0.015865	0.558553
ENST00000372836.4	chr6	415	1	1704	804	365	490	CNPY3	TGA	TGAG	8.04012	4.91341	0	3.12671	0.00471838	0.0061112	0	0.00638105	1.04416
ENST00000308521.10	chr22	258	1	4496	1089	91	3271	APOBEC3F	TGA	TGAG	5.80675	0.446673	0	5.36008	0.00129154	0.000410168	0	0.00163867	3.99511
ENST00000313143.9	chr3	870	1	5269	2118	253	2853	DVL3	TGA	TGAG	48.6874	23.227	0.446673	24.567	0.00924035	0.0109665	0.00176551	0.00861095	0.785206
ENST00000216489.8	chr14	400	-1	2597	1137	13	1402	ALKBH1	TGA	TGAG	10.7202	5.36008	0	5.36008	0.0041279	0.00471423	0	0.00382317	0.810984
ENST00000323468.10	chr11	918	-1	4253	1491	12	2705	KDELC2	TGA	TGAG	192.069	66.5543	0	123.728	0.0451609	0.0446374	0	0.0457407	1.02472
ENST00000221980.5	chr19	274	1	3029	2742	86	156	ICAM5	TGA	TGAG	0.446673	0.446673	0	0	0.000147466	0.000162901	0	0	0
ENST00000354371.7	chr2	1100	1	3438	597	70	2726	COPS8	TGA	TGAT	230.483	101.841	5.80675	120.155	0.06704	0.170589	0.0829536	0.0440774	0.258384
ENST00000319136.8	chr22	201	1	3000	1212	261	1482	APOL1	TGA	TGAC	0.446673	0.446673	0	0	0.000148891	0.000368542	0	0	0
ENST00000539410.2	chr12	685	1	2229	2052	125	7	GAS2L3	TAA	TAAA	42.8806	41.0939	0.446673	0.893346	0.0192376	0.0200263	0.00357339	0.127621	6.37267
ENST00000564845.5	chr16	459	1	11504	8613	296	2550	CHD9	TGA	TGAT	167.502	132.662	0.893346	33.5005	0.0145604	0.0154025	0.00301806	0.0131374	0.852941
ENST00000358536.8	chr3	258	-1	7308	6375	264	624	PLXNB1	TAG	TAGG	2.23337	1.34002	0.446673	0	0.000305606	0.000210199	0.00169194	0	0
ENST00000444614.8	chr13	119	-1	2059	789	303	922	CCDC122	TAA	TAAC	2.68004	0.893346	1.34002	0.446673	0.00130162	0.00113225	0.00442251	0.000484461	0.427874
ENST00000368759.5	chr10	648	1	1433	936	6	446	BCCIP	TAA	TAAT	37.5206	34.8405	0.446673	0	0.0261832	0.0372228	0.0744455	0	0
ENST00000586895.5	chr19	261	1	432	189	98	100	UBL5	TAG	TAGA	62.5343	49.5807	8.93346	0.893346	0.144755	0.262332	0.0911578	0.00893346	0.0340541
ENST00000373100.6	chr20	272	1	1826	1071	105	605	SGK2	TAG	TAGA	0.446673	0.446673	0	0	0.000244618	0.000417062	0	0	0
ENST00000582556.5	chr17	191	-1	763	405	304	9	RPL26	TAA	TAAA	919.254	848.232	23.6737	0	1.20479	2.0944	0.077874	0	0
ENST00000343484.10	chr20	472	1	1182	867	109	161	TCEA2	TGA	TGAC	3.12671	2.23337	0	0.893346	0.00264527	0.00257597	0	0.00554874	2.15404
ENST00000620429.4	chr11	1010	1	2739	1422	1199	73	VPS11	TAG	TAGC	3.57339	3.12671	0.446673	0	0.00130463	0.00219881	0.000372538	0	0
ENST00000380243.9	chr14	485	-1	16564	1227	242	15050	CCDC85C	TAG	TAGG	66.5543	0.893346	0	65.661	0.00401801	0.000728074	0	0.00436285	5.99233
ENST00000496811.6	chr3	769	-1	6723	2994	65	3619	DHX36	TGA	TGAC	95.1414	38.4139	0	55.8342	0.0141516	0.0128303	0	0.0154281	1.20247
ENST00000308683.3	chr5	53	-1	1707	1401	129	132	ZNF622	TGA	TGAG	5.36008	4.91341	0	0	0.00314006	0.00350707	0	0	0
ENST00000378572.8	chr10	57	1	1670	996	116	513	PRPF18	TGA	TGAG	20.1003	16.9736	0	3.12671	0.0120361	0.0170418	0	0.00609496	0.357649
ENST00000570984.7	chr17	16	-1	3857	3054	55	703	MYO1C	TGA	TGAT	70.1277	42.8806	0	25.907	0.0181819	0.0140408	0	0.0368521	2.62464
ENST00000340992.4	chr19	273	1	1176	786	33	312	ICAM4	TGA	TGAC	0.446673	0.446673	0	0	0.000379824	0.000568287	0	0	0
ENST00000300289.10	chr15	141	1	3680	1485	96	2054	PDIA3	TAA	TAAA	192.516	168.396	0	20.1003	0.0523142	0.113398	0	0.00978593	0.0862973
ENST00000337080.8	chr19	1210	1	1943	951	261	686	ZNF444	TAG	TAGC	3.57339	0.893346	1.34002	1.34002	0.00183911	0.000939376	0.00513418	0.00195338	2.07945
ENST00000342502.6	chr12	675	-1	1645	1020	406	174	IKBIP	TAG	TAGT	13.8469	11.6135	1.78669	0	0.00841755	0.0113858	0.00440072	0	0
ENST00000372970.6	chr20	278	-1	1616	846	175	550	OSER1	TGA	TGAT	25.0137	19.2069	0.893346	3.57339	0.0154788	0.0227032	0.00510484	0.00649707	0.286173
ENST00000353487.7	chr12	848	-1	4135	1122	485	2483	SPPL3	TGA	TGAT	14.7402	3.12671	0	11.1668	0.00356474	0.00278673	0	0.00449731	1.61383
ENST00000645843.1	chr4	511	1	5827	1362	312	4108	ABHD18	TAG	TAGT	16.5269	7.59345	0.446673	8.48679	0.00283626	0.00557522	0.00143165	0.00206592	0.370554
ENST00000262304.8	chr16	88	-1	14138	12879	203	1011	PKD1	TAG	TAGT	18.7603	14.7402	0	4.02006	0.00132694	0.00114452	0	0.00397632	3.47424
ENST00000334690.11	chr4	665	1	4523	3369	170	939	TRAPPC11	TGA	TGAT	32.1605	28.5871	0.446673	2.23337	0.00711043	0.00848533	0.00262749	0.00237845	0.280302
ENST00000392226.5	chr19	598	1	1783	1221	239	278	HPN	TGA	TGAC	0.446673	0	0	0.446673	0.000250518	0	0	0.00160674	0
ENST00000328736.7	chr14	415	-1	6089	3492	199	2353	AL162171.1	TAA	TAAG	18.3136	8.93346	0	8.93346	0.00300765	0.00255827	0	0.00379663	1.48406
ENST00000357775.5	chr18	36	1	2830	1428	229	1128	TXNDC2	TAA	TAAA	1.78669	0.893346	0	0.893346	0.00063134	0.000625593	0	0.000791974	1.26596
ENST00000405260.5	chr2	1135	-1	4942	3939	693	265	PASK	TAA	TAAA	3.12671	3.12671	0	0	0.000632682	0.000793783	0	0	0
ENST00000395332.7	chr7	272	1	1622	1362	202	13	ASL	TAG	TAGG	5.36008	5.36008	0	0	0.00330461	0.00393545	0	0	0
ENST00000450471.6	chr2	891	1	3659	1257	80	2277	CDK15	TGA	TGAA	26.8004	7.14677	0	19.6536	0.00732451	0.00568558	0	0.00863137	1.51812
ENST00000337975.6	chr15	452	-1	3650	1737	164	1704	KLHL25	TGA	TGAG	1.34002	0.446673	0	0.893346	0.000367129	0.000257152	0	0.000524264	2.03873
ENST00000551736.5	chr12	274	1	1684	1350	107	182	IRAK4	TAA	TAAA	8.93346	6.7001	0	1.34002	0.00530491	0.00496304	0	0.00736275	1.48352
ENST00000361891.9	chr1	1156	-1	1852	1140	65	602	ILF2	TGA	TGAC	209.49	145.169	4.02006	48.2407	0.113115	0.127341	0.0618471	0.0801341	0.629287
ENST00000340344.4	chr21	156	1	4676	294	60	4277	NDUFV3	TGA	TGAG	16.9736	2.68004	0	13.8469	0.00362994	0.00911578	0	0.00323752	0.355155
ENST00000506163.5	chr5	205	1	1445	816	3	581	SMN1	TAG	TAGA	5.36008	4.46673	0	0.893346	0.0037094	0.00547394	0	0.0015376	0.280895
ENST00000394440.8	chr2	278	-1	2376	1587	143	601	CCT4	TAA	TAAT	294.804	268.451	11.1668	9.82681	0.124076	0.169156	0.0780897	0.0163508	0.0966609
ENST00000251108.10	chr13	150	1	3386	1512	107	1722	CDADC1	TAA	TAAG	4.46673	2.23337	0.446673	1.78669	0.00131918	0.00147709	0.00417452	0.00103757	0.702439
ENST00000200652.4	chr5	399	1	2234	1623	217	349	SLC22A4	TGA	TGAA	0.893346	0.446673	0.446673	0	0.000399887	0.000275215	0.0020584	0	0
ENST00000504548.3	chr8	561	1	5390	1896	63	3386	TIGD5	TGA	TGAC	2.23337	0	0	2.23337	0.000414354	0	0	0.000659588	0
ENST00000589666.6	chr17	936	1	3890	2400	69	1376	UNK	TGA	TGAC	7.59345	6.7001	0	0.893346	0.00195204	0.00279171	0	0.000649234	0.232558
ENST00000372771.5	chr1	503	1	6232	5712	7	468	RLF	TAA	TAAG	46.454	45.114	0	1.34002	0.00745411	0.00789811	0	0.00286329	0.362529
ENST00000397382.8	chr14	70	-1	1986	1584	277	80	C14orf93	TAA	TAAA	3.12671	2.68004	0.446673	0	0.00157438	0.00169194	0.00161254	0	0
ENST00000482354.5	chrX	57	1	1870	1428	68	329	MOSPD2	TAA	TAAG	7.59345	6.7001	0	0	0.00406067	0.00469195	0	0	0
ENST00000332585.11	chr22	163	1	4261	2718	30	1468	OSBP2	TGA	TGAG	20.9936	14.7402	0	6.25343	0.00492693	0.00542319	0	0.00425983	0.785484
ENST00000394815.3	chr12	373	-1	3873	1326	106	2396	KRT80	TAA	TAAG	4.91341	2.23337	0	2.68004	0.00126863	0.00168429	0	0.00111855	0.664107
ENST00000399218.8	chr18	102	-1	7033	2595	50	4343	GAREM1	TAG	TAGC	9.38014	1.34002	0	8.04012	0.00133373	0.000516385	0	0.00185128	3.58508
ENST00000266503.9	chr12	231	1	2291	1878	12	356	ARNTL2	TAG	TAGC	180.456	163.929	4.02006	9.38014	0.0787673	0.0872892	0.335005	0.0263487	0.301855
ENST00000379485.1	chr13	106	-1	5178	1992	229	2912	KBTBD6	TGA	TGAA	34.8405	5.36008	0	29.4804	0.00672857	0.0026908	0	0.0101238	3.76236
ENST00000326925.10	chr3	277	1	2012	522	1128	317	NDUFAF3	TGA	TGAA	12.5069	10.7202	0.893346	0	0.00621613	0.0205367	0.000791974	0	0
ENST00000442287.6	chr15	463	-1	4487	3687	330	425	POLG	TAG	TAGC	15.6336	11.6135	0.446673	3.57339	0.00348419	0.00314985	0.00135356	0.00840797	2.66932
ENST00000257215.10	chr11	501	1	5799	3096	152	2506	DAGLA	TAG	TAGC	7.14677	1.78669	0	4.91341	0.00123241	0.000577097	0	0.00196066	3.39745
ENST00000378887.3	chr19	640	1	1117	315	70	687	SDHAF1	TGA	TGAC	2.68004	0	0	2.23337	0.00239932	0	0	0.0032509	0
ENST00000521367.5	chr5	521	1	1780	666	745	324	RELL2	TGA	TGAT	9.38014	5.80675	1.34002	1.34002	0.00526974	0.00871885	0.00179868	0.00413586	0.474359
ENST00000346618.8	chr6	86	1	5036	1365	348	3278	E2F3	TGA	TGAT	106.308	21.887	0.446673	83.5279	0.0211097	0.0160344	0.00128354	0.0254814	1.58917
ENST00000506380.5	chr4	55	1	798	525	186	42	NSG1	TAG	TAGC	1.34002	1.34002	0	0	0.00167922	0.00255242	0	0	0
ENST00000397411.6	chr11	39	1	1025	684	115	181	TSPAN4	TAG	TAGG	10.7202	10.7202	0	0	0.0104587	0.0156727	0	0	0
ENST00000393114.7	chr7	665	-1	1482	441	176	820	CYREN	TAG	TAGG	41.9873	11.6135	4.91341	25.0137	0.0283315	0.0263345	0.0279171	0.0305045	1.15835
ENST00000428984.6	chr15	16	-1	2986	2526	390	25	UBE3A	TAA	TAAA	247.01	217.977	21.4403	1.78669	0.0827228	0.0862932	0.0549752	0.0714677	0.828197
ENST00000330062.7	chr15	474	-1	2694	1326	108	1215	IDH2	TAG	TAGG	17.4203	11.6135	0	5.80675	0.00646632	0.0087583	0	0.00477922	0.545679
ENST00000599845.3	chrX	700	1	844	351	147	301	CSAG3	TAA	TAAA	1.78669	1.78669	0	0	0.00211693	0.00509029	0	0	0
ENST00000618742.2	chr8	13	-1	4893	2028	145	2675	XKR5	TGA	TGAC	1.78669	0.893346	0	0.893346	0.000365153	0.000440506	0	0.000333961	0.758131
ENST00000356853.9	chr2	990	-1	2094	867	128	1054	NHEJ1	TAA	TAAT	17.8669	6.7001	0.893346	9.38014	0.00853244	0.00772791	0.00697927	0.00889956	1.15161
ENST00000369902.7	chr10	518	1	5001	1422	160	3374	SUFU	TAG	TAGC	6.7001	1.34002	0	5.36008	0.00133975	0.000942349	0	0.00158864	1.68583
ENST00000614467.4	chr6	411	1	6510	3207	320	2938	BICRAL	TAA	TAAT	8.48679	6.25343	0	2.23337	0.00130365	0.00194993	0	0.000760165	0.389842
ENST00000391764.7	chr19	1134	1	267	213	4	5	NDUFA3	TGA	TGAG	18.3136	16.0802	0.893346	0	0.0685903	0.0754941	0.223337	0	0
ENST00000357122.8	chr17	747	-1	4761	3891	203	622	SPAG9	TGA	TGAG	121.942	104.522	0	15.6336	0.0256126	0.0268624	0	0.0251343	0.935671
ENST00000266039.7	chr3	321	-1	5476	3405	168	1858	CACNA2D2	TGA	TGAG	0.893346	0	0	0.893346	0.000163139	0	0	0.000480811	0
ENST00000423778.7	chr3	676	-1	5704	1953	56	3650	KY	TGA	TGAG	0.446673	0	0	0.446673	7.83088e-05	0	0	0.000122376	0
ENST00000543341.7	chr12	898	1	3327	894	25	2363	GTF2H3	TGA	TGAG	118.815	41.9873	3.57339	72.8077	0.0357124	0.0469656	0.142935	0.0308116	0.656045
ENST00000392951.8	chr11	975	1	928	573	118	192	TAGLN	TAG	TAGA	2.23337	1.78669	0	0.446673	0.00240664	0.00311814	0	0.00232642	0.746094
ENST00000375442.8	chrX	260	1	2815	2049	126	595	TSPYL2	TAA	TAAG	4.46673	4.02006	0	0.446673	0.00158676	0.00196196	0	0.000750711	0.382633
ENST00000407249.7	chr1	41	-1	2677	2355	106	171	CDK11B	TGA	TGAA	7.14677	7.14677	0	0	0.00266969	0.00303472	0	0	0
ENST00000229335.11	chr12	107	-1	2803	564	86	2108	AICDA	TGA	TGAT	0.446673	0	0	0.446673	0.000159355	0	0	0.000211894	0
ENST00000245105.8	chr4	80	1	4303	3978	138	142	SH3TC1	TGA	TGAG	4.02006	4.02006	0	0	0.000934246	0.00101057	0	0	0
ENST00000307365.4	chr10	290	1	1744	666	191	842	DDIT4	TGA	TGAA	1.78669	0.446673	0	0.893346	0.00102448	0.000670681	0	0.00106098	1.58195
ENST00000336990.8	chr18	46	1	1715	486	74	1110	PRELID3A	TAA	TAAG	2.68004	0.446673	0.893346	1.34002	0.00156271	0.000919081	0.0120722	0.00120722	1.31351
ENST00000269260.7	chr17	70	1	1778	1197	84	452	ARRB2	TAG	TAGG	69.681	38.4139	2.23337	27.2471	0.0391907	0.0320918	0.0265877	0.0602811	1.8784
ENST00000279907.12	chr12	679	-1	5198	4362	233	558	UHRF1BP1L	TAG	TAGC	59.4075	52.7074	1.34002	2.68004	0.0114289	0.0120833	0.00575116	0.00480294	0.397485
ENST00000341653.6	chr14	292	-1	330	219	42	24	MAX	TAA	TAAT	11.1668	8.93346	1.78669	0	0.0338389	0.0407921	0.0425403	0	0
ENST00000398073.7	chr12	539	-1	4785	783	288	3669	CTDSP2	TAG	TAGC	434.613	71.4677	1.34002	358.679	0.0908282	0.0912742	0.00465285	0.0977592	1.07105
ENST00000258229.14	chr1	1780	-1	7530	6381	241	863	PCNX2	TGA	TGAC	20.1003	20.1003	0	0	0.00266936	0.00315002	0	0	0
ENST00000395284.7	chr10	227	1	1913	861	136	871	CDK1	TAG	TAGC	115.688	80.8479	8.93346	20.547	0.0604748	0.0938999	0.0656872	0.0235901	0.251226
ENST00000280020.10	chr18	122	1	4853	1701	6	3101	KIAA1328	TGA	TGAC	5.36008	3.57339	0	1.78669	0.00110449	0.00210076	0	0.000576167	0.274266
ENST00000397861.7	chr17	762	-1	2037	240	1298	454	C17orf67	TAA	TAAG	0.893346	0	0.893346	0	0.00043856	0	0.000688248	0	0
ENST00000370630.6	chr1	769	-1	6571	1125	19	5382	CTBS	TGA	TGAA	29.0338	19.2069	0	9.82681	0.00441847	0.0170728	0	0.00182587	0.106946
ENST00000292782.8	chr3	856	-1	7954	747	148	7014	DCUN1D1	TAG	TAGC	111.222	41.9873	2.68004	62.5343	0.0139831	0.0562079	0.0181084	0.00891563	0.158619
ENST00000530277.5	chr11	1044	-1	3984	615	401	2923	SCN3B	TAG	TAGA	0.446673	0.446673	0	0	0.000112117	0.000726298	0	0	0
ENST00000555761.5	chr14	401	-1	1855	1683	23	104	SNW1	TGA	TGAA	34.3938	32.6071	0.893346	0	0.0185412	0.0193744	0.0388412	0	0
ENST00000406438.5	chr17	269	1	8297	2781	491	4980	SMCR8	TGA	TGAG	80.8479	9.38014	0.446673	71.021	0.00974423	0.00337294	0.000909721	0.0142613	4.22814
ENST00000333602.12	chr3	947	-1	4476	3084	537	810	TNK2	TGA	TGAG	19.2069	10.7202	0	8.48679	0.0042911	0.00347606	0	0.0104775	3.0142
ENST00000229332.11	chr12	101	1	1281	681	241	314	CLEC4A	TGA	TGAA	2.23337	2.23337	0	0	0.00174346	0.00327954	0	0	0
ENST00000258975.7	chr17	825	1	1446	861	183	357	TACO1	TAA	TAAC	5.80675	4.91341	0	0.893346	0.00401573	0.00570663	0	0.00250237	0.438503
ENST00000299339.3	chr13	221	1	2466	654	28	1739	CLDN10	TAA	TAAA	16.5269	6.7001	0.446673	9.38014	0.00670191	0.0102448	0.0159526	0.00539398	0.526509
ENST00000535621.6	chr16	219	1	2048	1464	182	357	PDXDC1	TGA	TGAG	26.3537	24.1204	1.34002	0	0.012868	0.0164757	0.00736275	0	0
ENST00000219302.7	chr16	64	-1	1069	477	190	357	NME3	TAG	TAGC	2.68004	0.893346	0	0.893346	0.00250705	0.00187284	0	0.00250237	1.33613
ENST00000406652.5	chr2	208	1	5484	1581	316	3542	MTA3	TGA	TGAG	12.0602	8.04012	1.34002	2.23337	0.00219916	0.00508546	0.00424057	0.000630538	0.123988
ENST00000298289.6	chr14	187	-1	746	288	154	259	RPL36AL	TAA	TAAA	193.856	139.809	37.9672	0.446673	0.259861	0.485447	0.24654	0.00172461	0.00355262
ENST00000450142.7	chr12	616	-1	5620	3060	160	2355	PPP1R12A	TAA	TAAA	88.888	58.5142	0.893346	28.5871	0.0158164	0.0191223	0.00558342	0.0121389	0.634803
ENST00000358697.5	chrX	298	-1	4113	2367	394	1307	ZXDA	TGA	TGAA	1.34002	0.446673	0	0.893346	0.000325801	0.000188709	0	0.000683509	3.62204
ENST00000222122.9	chr19	965	-1	2229	945	438	801	DBP	TGA	TGAG	0.446673	0.446673	0	0	0.000200392	0.00047267	0	0	0
ENST00000425146.5	chrX	500	1	2477	1602	365	465	PAK3	TAA	TAAG	0.446673	0.446673	0	0	0.000180328	0.000278822	0	0	0
ENST00000262306.11	chr16	109	-1	582	453	32	52	ELOB	TAA	TAAT	112.115	102.288	4.02006	0	0.192637	0.225802	0.125627	0	0
ENST00000617859.4	chr10	629	-1	4542	1227	304	2966	IKZF5	TGA	TGAT	7.59345	3.12671	0.893346	3.57339	0.00167183	0.00254826	0.00293864	0.00120478	0.472787
ENST00000320776.4	chr4	70	1	1617	621	149	802	BLOC1S4	TGA	TGAC	7.59345	1.78669	0	4.02006	0.00469601	0.00287712	0	0.00501254	1.74221
ENST00000405938.5	chr22	116	-1	2896	2481	349	21	TFIP11	TGA	TGAA	3.57339	3.57339	0	0	0.0012339	0.0014403	0	0	0
ENST00000268182.10	chr15	480	1	7205	4941	94	2125	IQGAP1	TAA	TAAT	353.319	112.115	0	232.27	0.049038	0.0226907	0	0.109304	4.8171
ENST00000265334.9	chr5	422	-1	2222	1746	210	221	CDKL3	TAG	TAGT	0.446673	0.446673	0	0	0.000201023	0.000255827	0	0	0
ENST00000643483.1	chr13	298	1	5122	2406	1637	1034	CHAMP1	TGA	TGAT	4.91341	2.68004	0.446673	1.34002	0.000959275	0.0011139	0.000272861	0.00129596	1.16344
ENST00000376945.3	chr13	219	-1	2778	798	344	1591	SOX21	TGA	TGAC	0.893346	0	0	0.893346	0.000321579	0	0	0.0005615	0
ENST00000260753.8	chr10	391	1	6306	5310	66	885	KIF20B	TAA	TAAA	82.6346	64.7676	0	17.4203	0.0131041	0.0121973	0	0.0196839	1.61379
ENST00000357460.6	chr14	80	-1	4971	1620	159	3147	HOMEZ	TGA	TGAG	16.9736	11.6135	0	5.36008	0.00341452	0.00716883	0	0.00170323	0.237589
ENST00000281834.4	chr1	1424	-1	3492	519	149	2779	TNFSF4	TGA	TGAG	0.446673	0	0	0.446673	0.000127913	0	0	0.000160732	0
ENST00000416476.6	chr3	496	1	2178	1854	214	65	BBX	TAG	TAGT	99.1615	86.2079	3.57339	5.80675	0.0455287	0.0464983	0.0166981	0.0893346	1.92124
ENST00000376300.7	chr2	582	-1	6833	1863	69	4856	CCDC93	TGA	TGAA	106.755	17.4203	0.893346	87.9946	0.0156234	0.00935065	0.0129471	0.0181208	1.93792
ENST00000309733.6	chr4	460	1	8844	366	121	8312	FAM241A	TAA	TAAA	57.6208	11.1668	0	46.454	0.00651525	0.0305105	0	0.00558879	0.183176
ENST00000251810.7	chr8	430	-1	4931	1023	238	3625	RRM2B	TAA	TAAA	65.661	9.82681	0.446673	54.9408	0.013316	0.00960588	0.00187678	0.0151561	1.57779
ENST00000396813.5	chr14	114	-1	1470	909	263	253	DHRS1	TAA	TAAC	0.446673	0.446673	0	0	0.000303859	0.00049139	0	0	0
ENST00000394809.9	chr16	432	-1	8033	2427	145	5416	MYLK3	TAA	TAAT	12.9535	2.23337	0	10.7202	0.00161254	0.000920217	0	0.00197935	2.15096
ENST00000243189.12	chr1	304	-1	1425	840	206	334	RSRP1	TAA	TAAA	2.23337	2.23337	0	0	0.00156727	0.00265877	0	0	0
ENST00000243644.9	chr19	1090	-1	2355	1566	236	508	ZNF350	TAG	TAGG	6.25343	4.02006	2.23337	0	0.00265538	0.00256709	0.00946342	0	0
ENST00000272418.7	chr2	444	-1	3298	1260	11	1982	MRPS5	TAA	TAAC	33.5005	32.6071	0	0.446673	0.0101578	0.0258787	0	0.000225365	0.00870851
ENST00000358268.6	chr21	131	-1	2564	1980	523	16	LCA5L	TAA	TAAA	0.893346	0.893346	0	0	0.000348419	0.000451185	0	0	0
ENST00000298355.7	chr14	206	-1	5284	2100	1116	2023	TRIM9	TAA	TAAG	24.1204	8.93346	0.446673	14.2935	0.00456479	0.00425403	0.000400245	0.00706552	1.6609
ENST00000408912.7	chr16	416	1	3626	3060	311	210	ARMC5	TAG	TAGA	1.78669	1.78669	0	0	0.000492745	0.000583887	0	0	0
ENST00000304330.9	chr15	104	-1	4663	4149	109	360	RPAP1	TAG	TAGG	11.6135	7.59345	0	4.02006	0.00249056	0.00183019	0	0.0111668	6.10147
ENST00000372466.8	chrX	479	-1	1755	522	246	942	NUP62CL	TGA	TGAA	6.25343	1.78669	0.893346	2.23337	0.00356321	0.00342278	0.00363149	0.00237088	0.692675
ENST00000374434.4	chr1	292	-1	5760	4281	117	1317	MYOM3	TGA	TGAC	12.5069	8.93346	0	3.57339	0.00217133	0.00208677	0	0.00271328	1.30023
ENST00000239144.4	chr17	697	-1	1823	699	229	850	HOXB8	TAG	TAGG	2.23337	1.34002	0	0.893346	0.0012251	0.00191705	0	0.001051	0.548235
ENST00000262093.10	chr18	176	-1	7677	1239	76	6317	FECH	TGA	TGAC	56.2808	21.4403	0	34.8405	0.0073311	0.0173045	0	0.00551536	0.318723
ENST00000345317.7	chr7	130	-1	3839	1047	155	2592	SKAP2	TGA	TGAG	59.8542	12.5069	0	47.3474	0.0155911	0.0119454	0	0.0182667	1.52918
ENST00000229758.8	chr6	852	-1	2054	1311	76	622	FBXO5	TGA	TGAT	49.5807	47.794	0	1.78669	0.0241386	0.0364562	0	0.0028725	0.0787932
ENST00000268720.9	chr16	748	1	2657	1869	124	619	CPNE7	TGA	TGAA	2.68004	1.78669	0	0.893346	0.00100867	0.000955962	0	0.00144321	1.50969
ENST00000355765.10	chr14	180	1	2868	1977	164	682	PRPF39	TGA	TGAT	18.3136	15.1869	1.34002	1.78669	0.0063855	0.00768179	0.00817085	0.00261978	0.341038
ENST00000318596.7	chr19	505	1	3120	924	145	2006	SLC25A42	TAG	TAGG	2.23337	0	0	2.23337	0.000715823	0	0	0.00111334	0
ENST00000378746.8	chr5	405	-1	6325	2067	213	4000	KIF3A	TAA	TAAA	25.907	10.2735	0	15.6336	0.00409598	0.00497024	0	0.00390839	0.786359
ENST00000369983.3	chr10	510	1	6403	5547	254	557	GBF1	TAA	TAAG	31.2671	25.4604	0	4.91341	0.0048832	0.00458994	0	0.0088212	1.92186
ENST00000568956.1	chr19	1199	1	4005	3147	348	465	ZNF865	TGA	TGAC	1.34002	0.446673	0	0.893346	0.000334587	0.000141936	0	0.00192118	13.5355
ENST00000372153.5	chr9	586	-1	3285	2523	146	571	DDX31	TAA	TAAA	13.8469	12.5069	0.446673	0.893346	0.00421518	0.00495713	0.00305941	0.00156453	0.315612
ENST00000296424.9	chr4	427	-1	2920	705	66	2104	BDH2	TGA	TGAT	15.6336	10.7202	1.34002	2.68004	0.00535396	0.0152059	0.0203033	0.00127378	0.083769
ENST00000367498.8	chr1	1496	-1	4113	1896	531	1641	IVNS1ABP	TAA	TAAC	71.021	47.794	3.12671	19.6536	0.0172675	0.0252078	0.00588835	0.0119766	0.475115
ENST00000215368.4	chr19	43	1	2424	609	290	1480	EFNA2	TAG	TAGT	4.02006	0.893346	0	3.12671	0.00165844	0.00146691	0	0.00211264	1.4402
ENST00000485866.5	chr3	604	-1	2960	2352	556	7	ZNF148	TAA	TAAA	61.6409	54.9408	5.80675	0.446673	0.0208246	0.0233592	0.0104438	0.0638105	2.73171
ENST00000391860.7	chr1	1760	-1	10914	1542	398	8929	PGBD5	TGA	TGAT	8.93346	3.57339	0	5.36008	0.000818533	0.00231737	0	0.0006003	0.259044
ENST00000280571.9	chr12	892	-1	6141	603	291	5202	RILPL2	TAG	TAGA	8.93346	3.57339	0.446673	4.91341	0.00145472	0.00592601	0.00153496	0.000944522	0.159386
ENST00000265316.9	chr2	995	-1	2980	2496	279	160	ABCB6	TGA	TGAC	1.78669	1.78669	0	0	0.000599561	0.000715823	0	0	0
ENST00000550804.6	chr12	424	-1	5576	2043	67	3421	CALCOCO1	TGA	TGAT	4.02006	2.23337	0	1.78669	0.000720958	0.00109318	0	0.000522272	0.477755
ENST00000650053.1	chr2	1129	-1	5624	5040	164	375	KIF1A	TGA	TGAA	1.34002	0.893346	0	0.446673	0.000238268	0.000177251	0	0.00119113	6.72
ENST00000539589.5	chr11	350	-1	2009	1242	337	385	PACSIN3	TGA	TGAG	12.0602	9.82681	0.446673	1.34002	0.00600307	0.00791209	0.00132544	0.00348057	0.439906
ENST00000406855.7	chr22	88	-1	1063	687	13	318	DERL3	TGA	TGAG	0.446673	0	0	0	0.000420201	0	0	0	0
ENST00000393240.7	chr12	614	1	3095	1236	665	1149	SYT1	TAA	TAAA	23.227	9.82681	3.12671	10.2735	0.00750469	0.00795049	0.00470182	0.00894124	1.12461
ENST00000472174.7	chr1	555	1	987	585	75	282	ATP6V0B	TAG	TAGA	16.5269	11.1668	0.446673	4.02006	0.0167446	0.0190886	0.00595564	0.0142555	0.746809
ENST00000373095.6	chr9	515	-1	4617	1122	846	2604	FAM102A	TGA	TGAG	10.2735	1.78669	0	8.04012	0.00222514	0.00159242	0	0.0030876	1.93894
ENST00000222573.5	chr7	99	1	8974	2277	901	5751	ITGB8	TAA	TAAA	11.1668	2.23337	0.893346	8.04012	0.00124435	0.000980837	0.000991506	0.00139804	1.42535
ENST00000216797.9	chr14	154	-1	1558	921	96	496	NFKBIA	TGA	TGAG	23.227	15.1869	0	6.25343	0.0149082	0.0164896	0	0.0126077	0.764587
ENST00000393437.7	chr2	497	-1	13912	2232	634	11001	LONRF2	TGA	TGAT	0.446673	0	0	0.446673	3.2107e-05	0	0	4.0603e-05	0
ENST00000424100.1	chr7	568	-1	2895	1080	448	1322	GPR85	TGA	TGAG	0.446673	0.446673	0	0	0.000154291	0.000413586	0	0	0
ENST00000397203.6	chr12	9	1	9118	3234	151	5688	ERC1	TGA	TGAC	220.657	43.774	3.12671	172.863	0.0242001	0.0135356	0.0207067	0.0303907	2.24525
ENST00000361175.8	chr10	371	1	3949	1812	363	1729	PAPSS2	TAA	TAAG	54.9408	30.3738	1.34002	21.887	0.0139126	0.0167626	0.00369151	0.0126588	0.75518
ENST00000372458.8	chr1	545	-1	1466	807	105	509	ELOVL1	TGA	TGAG	15.6336	9.82681	0.446673	4.91341	0.0106641	0.012177	0.00425403	0.00965306	0.792731
ENST00000371224.7	chr10	427	-1	3352	2355	137	815	ALDH18A1	TGA	TGAA	41.5406	29.0338	0	12.0602	0.0123928	0.0123286	0	0.0147978	1.20028
ENST00000397062.8	chr2	792	-1	2446	1785	145	471	NFE2L2	TAG	TAGA	141.149	139.362	0.893346	0.893346	0.0577059	0.078074	0.00616101	0.0018967	0.0242936
ENST00000345941.2	chr13	146	-1	2428	1002	1137	244	LPAR6	TGA	TGAA	11.6135	6.25343	4.46673	0	0.00478316	0.00624094	0.00392852	0	0
ENST00000645955.1	chr13	161	1	1829	837	153	794	RNASEH2B	TGA	TGAG	33.9472	31.7138	0.893346	0	0.0185605	0.0378898	0.00583887	0	0
ENST00000338087.10	chr8	517	-1	2995	798	362	1790	SLA	TAG	TAGC	0.446673	0	0	0.446673	0.00014914	0	0	0.000249538	0
ENST00000360000.8	chrX	446	-1	1131	321	140	625	TCEAL8	TGA	TGAA	41.5406	26.3537	4.91341	9.82681	0.0367291	0.0820988	0.0350958	0.0157229	0.191512
ENST00000374403.4	chrX	328	1	4388	3666	62	615	KIF4A	TGA	TGAA	70.1277	58.0675	0	10.7202	0.0159817	0.0158395	0	0.0174312	1.10049
ENST00000641064.1	chr17	40	-1	4882	906	363	3568	OR1D2	TGA	TGAG	0.446673	0	0	0.446673	9.14939e-05	0	0	0.000125189	0
ENST00000280871.9	chr12	264	-1	7221	1914	267	4995	SLC2A13	TAA	TAAT	51.8141	10.2735	0	41.0939	0.00717547	0.00536755	0	0.00822701	1.53273
ENST00000377727.1	chr6	125	-1	397	279	4	69	HIST1H4H	TAA	TAAG	31.7138	28.5871	1.34002	0	0.0798836	0.102463	0.335005	0	0
ENST00000228928.12	chr12	791	1	6599	3231	51	3272	OAS3	TGA	TGAA	7.59345	0.446673	0	7.14677	0.0011507	0.000138246	0	0.00218422	15.7995
ENST00000534313.6	chr11	621	1	3499	3096	167	191	SIPA1	TGA	TGAG	2.68004	1.78669	0	0.893346	0.000765944	0.000577097	0	0.00467721	8.10471
ENST00000354284.8	chr11	995	1	1456	1023	57	331	TMEM25	TAA	TAAC	0.893346	0.893346	0	0	0.000613562	0.000873261	0	0	0
ENST00000590194.5	chr17	632	-1	1542	1023	121	353	SLC25A39	TGA	TGAA	58.0675	34.3938	1.34002	19.2069	0.0376573	0.0336206	0.0110745	0.0544106	1.61837
ENST00000335183.11	chr14	223	1	841	606	56	134	CDKN3	TAA	TAAA	46.0073	40.2006	2.68004	0	0.0547055	0.0663376	0.0478578	0	0
ENST00000528785.1	chr1	885	1	1271	663	29	534	CYB561D1	TAA	TAAG	0.446673	0.446673	0	0	0.000351434	0.000673715	0	0	0
ENST00000338791.11	chr7	620	-1	2611	1767	75	724	IMPDH1	TGA	TGAG	73.7011	52.7074	0	19.6536	0.0282271	0.0298288	0	0.0271459	0.910057
ENST00000380117.5	chr9	89	-1	2370	1047	538	740	ELAVL2	TAA	TAAT	5.80675	4.91341	0	0.893346	0.00245011	0.00469284	0	0.00120722	0.257248
ENST00000645929.1	chr14	48	-1	7422	6876	95	406	CHD8	TGA	TGAA	63.8743	54.0475	0	8.93346	0.00860607	0.00786031	0	0.0220036	2.79933
ENST00000283684.9	chr18	178	-1	6144	3723	320	2056	ATP8B1	TGA	TGAT	7.14677	4.91341	0	2.23337	0.00116321	0.00131974	0	0.00108627	0.82309
ENST00000359238.6	chr17	690	1	2315	780	261	1229	SNX11	TGA	TGAG	5.36008	0.893346	0	4.46673	0.00231537	0.00114532	0	0.00363444	3.17331
ENST00000611250.4	chrX	170	1	4713	2439	70	2159	JADE3	TGA	TGAT	66.5543	27.2471	0	38.4139	0.0141214	0.0111714	0	0.0177924	1.59268
ENST00000510878.1	chr1	139	1	849	435	28	341	AGTRAP	TAA	TAAG	6.25343	2.23337	0.446673	3.57339	0.00736564	0.00513418	0.0159526	0.0104791	2.04106
ENST00000295767.9	chr3	67	-1	1603	435	319	804	CHCHD4	TAA	TAAT	29.0338	16.9736	2.23337	9.82681	0.0181121	0.0390197	0.00700115	0.0122224	0.313236
ENST00000573759.1	chr17	104	1	2204	585	323	1251	MIS12	TAA	TAAT	23.6737	2.23337	1.78669	19.2069	0.0107412	0.00381772	0.00553156	0.0153533	4.02158
ENST00000322203.7	chr6	333	1	718	621	28	24	RPL10A	TAA	TAAG	305.078	273.364	14.7402	0	0.424899	0.4402	0.526436	0	0
ENST00000639811.1	chr12	100	1	2175	732	3	1395	NECAP1	TAA	TAAA	44.6673	12.5069	0	30.8205	0.0205367	0.0170859	0	0.0220935	1.29309
ENST00000248104.11	chr16	53	-1	4320	657	589	3029	UNKL	TGA	TGAC	16.9736	0.446673	0	16.5269	0.00392907	0.000679868	0	0.00545623	8.02542
ENST00000355451.8	chr7	211	-1	8036	1053	52	6886	NUDCD3	TAA	TAAT	42.8806	11.1668	0.893346	29.9271	0.00533607	0.0106048	0.0171797	0.00434608	0.409823
ENST00000255882.10	chr22	46	-1	6752	6276	81	350	PI4KA	TGA	TGAG	8.48679	7.14677	0	0.446673	0.00125693	0.00113875	0	0.00127621	1.12071
ENST00000613397.4	chr11	882	1	4066	1824	1723	474	BIRC2	TAA	TAAA	104.968	74.5944	18.7603	8.93346	0.0258161	0.0408961	0.0108881	0.018847	0.46085
ENST00000274140.10	chr5	41	1	9641	2700	198	6698	2020-03-06	TAA	TAAA	200.11	63.4276	0.446673	135.789	0.0207561	0.0234917	0.00225593	0.020273	0.862986
ENST00000573584.6	chr17	99	-1	3611	2193	6	1367	NUP88	TGA	TGAC	24.567	23.227	0	0.893346	0.00680339	0.0105914	0	0.000653509	0.0617016
ENST00000271526.9	chr1	1249	1	2068	1443	231	349	PRCC	TAG	TAGG	19.2069	12.9535	1.34002	4.02006	0.00928769	0.0089768	0.00580095	0.0115188	1.28317
ENST00000328194.8	chr11	180	-1	4991	3831	275	840	DENND5A	TGA	TGAC	178.669	162.142	0	16.0802	0.0357983	0.0423238	0	0.0191431	0.452302
ENST00000291481.8	chr19	510	-1	4342	1176	66	3055	HAPLN4	TAG	TAGG	0.893346	0.446673	0	0.446673	0.000205745	0.000379824	0	0.000146211	0.384943
ENST00000332624.8	chr2	886	-1	6389	2712	302	3330	TRAK2	TGA	TGAG	118.815	73.2544	6.25343	37.0739	0.0185968	0.0270112	0.0207067	0.0111333	0.412173
ENST00000584773.5	chr17	773	-1	1317	729	118	425	SRSF1	TAA	TAAG	252.817	134.002	25.0137	79.0612	0.191964	0.183816	0.211981	0.186026	1.01202
ENST00000344517.5	chr1	1756	-1	3869	2184	49	1591	ABCB10	TAA	TAAG	9.82681	6.7001	0	3.12671	0.00253988	0.00306781	0	0.00196525	0.640603
ENST00000301919.9	chr11	903	-1	4103	1005	1423	1630	MSANTD4	TGA	TGAT	52.2608	28.1404	5.36008	18.7603	0.0127372	0.0280004	0.00376675	0.0115094	0.411043
ENST00000613052.1	chr9	529	1	1429	435	939	10	CERCAM	TAA	TAAA	2.23337	1.34002	0.893346	0	0.00156289	0.00308051	0.000951381	0	0
ENST00000431561.7	chr16	131	-1	3348	1155	607	1541	ZNF200	TAA	TAAT	9.82681	4.91341	0	4.46673	0.00293513	0.00425403	0	0.00289859	0.681376
ENST00000344320.7	chr15	87	1	2370	495	410	1420	C15orf62	TAA	TAAA	0.893346	0	0	0.893346	0.000376939	0	0	0.000629117	0
ENST00000367030.7	chr1	1641	-1	3931	3486	112	288	LAMB3	TGA	TGAT	1.78669	0.446673	0	0.893346	0.000454514	0.000128133	0	0.0031019	24.2083
ENST00000263773.9	chr11	366	-1	3972	3021	7	899	FNBP4	TAG	TAGT	35.7339	24.567	0	10.7202	0.00899644	0.00813208	0	0.0119245	1.46636
ENST00000263805.8	chr15	117	-1	10460	5619	321	4475	ZNF106	TGA	TGAA	440.866	180.009	0	260.411	0.0421478	0.0320358	0	0.0581923	1.81648
ENST00000291536.8	chr21	152	-1	1300	897	32	326	RSPH1	TAA	TAAG	0.446673	0	0	0.446673	0.000343595	0	0	0.00137016	0
ENST00000373116.6	chr1	467	-1	953	741	103	64	MRPS15	TAA	TAAA	16.0802	14.2935	0.446673	0	0.0168733	0.0192895	0.00433663	0	0
ENST00000373218.5	chr10	273	1	7491	330	251	6865	EIF4EBP2	TGA	TGAC	1383.35	39.3072	0.893346	1338.23	0.184668	0.119113	0.00355915	0.194936	1.63656
ENST00000643188.1	chr20	208	-1	1940	1392	160	343	GSS	TGA	TGAG	12.9535	10.2735	0	2.68004	0.00667707	0.00738038	0	0.00781353	1.05869
ENST00000378378.9	chr1	65	1	2822	2097	160	520	ARHGEF16	TAG	TAGC	1.34002	1.34002	0	0	0.000474848	0.000639018	0	0	0
ENST00000372745.1	chr10	318	-1	2320	1224	211	840	AP3M1	TGA	TGAG	32.6071	14.7402	1.34002	15.6336	0.0140548	0.0120427	0.0063508	0.0186114	1.54545
ENST00000370693.5	chr6	523	1	6651	603	366	5637	BAG2	TAG	TAGT	61.1942	31.7138	1.34002	28.1404	0.00920076	0.0525934	0.00366126	0.00499209	0.0949186
ENST00000395074.6	chr11	438	-1	1833	1128	83	577	LPXN	TAA	TAAT	33.9472	26.3537	2.23337	4.02006	0.01852	0.0233632	0.026908	0.00696717	0.298211
ENST00000554998.5	chr14	495	1	1952	1602	81	224	WDR25	TGA	TGAG	5.80675	4.46673	0	1.34002	0.00297477	0.00278822	0	0.00598223	2.14554
ENST00000322213.8	chrX	264	-1	9784	3669	122	5948	SMC1A	TAG	TAGC	55.3875	20.547	0	34.8405	0.00566103	0.00560016	0	0.00585752	1.04596
ENST00000414097.6	chr8	519	-1	3755	1152	862	1696	NDRG1	TAG	TAGG	22.7803	3.12671	0.446673	19.2069	0.00606667	0.00271416	0.000518182	0.0113249	4.17251
ENST00000396556.6	chr3	122	-1	6600	2262	117	4176	OSBPL10	TGA	TGAT	88.4413	38.8606	0	47.3474	0.0134002	0.0171797	0	0.011338	0.659962
ENST00000484866.5	chr3	842	1	1730	1425	76	184	ZNF639	TGA	TGAT	50.9207	48.2407	1.78669	0.893346	0.029434	0.0338531	0.0235091	0.00485514	0.143418
ENST00000295777.9	chr3	810	1	1907	1200	425	237	SERPINI1	TAA	TAAG	0.446673	0	0.446673	0	0.000234228	0	0.001051	0	0
ENST00000483273.2	chr1	194	-1	2180	243	1693	199	UQCRHL	TAA	TAAA	10.2735	3.57339	4.46673	0	0.00471261	0.0147053	0.00263835	0	0
ENST00000379719.8	chr11	182	1	6162	3084	106	2927	IPO7	TGA	TGAG	807.139	504.294	8.93346	281.404	0.130986	0.163519	0.084278	0.0961408	0.587947
ENST00000394249.8	chr15	489	-1	3072	1830	112	1085	PRC1	TGA	TGAG	180.903	101.395	5.36008	73.7011	0.0588876	0.055407	0.0478578	0.0679273	1.22597
ENST00000247194.9	chr14	255	-1	1516	1032	86	353	L3HYPDH	TGA	TGAC	3.57339	3.57339	0	0	0.00235711	0.00346258	0	0	0
ENST00000256442.10	chr5	193	1	2029	1269	107	608	CCNB1	TAA	TAAC	51.3674	44.6673	3.57339	3.12671	0.0253166	0.0351988	0.0333961	0.00514262	0.146102
ENST00000586682.1	chr19	425	1	1315	591	-1	680	RAB8A	TGA	TGAG	71.9144	24.567	71.9144	46.9007	0.0546878	0.0415686	-71.9144	0.0689716	1.65922
ENST00000423759.5	chrX	342	1	7722	5655	70	1952	TAF1	TGA	TGAG	62.0876	39.3072	0	22.7803	0.00804035	0.00695088	0	0.0116703	1.67896
ENST00000388948.8	chr15	513	1	15674	6015	211	9403	LRRK1	TAA	TAAT	21.887	10.2735	0.893346	10.7202	0.00139639	0.00170798	0.00423387	0.00114008	0.667502
ENST00000419938.5	chr2	668	-1	1755	630	227	853	ZEB2	TGA	TGAA	7.59345	1.78669	0.446673	4.46673	0.00432675	0.00283602	0.00196772	0.0052365	1.84642
ENST00000375071.4	chr1	248	1	809	408	27	329	CDA	TGA	TGAC	0.446673	0.446673	0	0	0.00055213	0.00109479	0	0	0
ENST00000308666.4	chr12	262	-1	6290	2190	182	3873	ABCD2	TAA	TAAT	1.78669	0.446673	0.893346	0.446673	0.000284053	0.00020396	0.0049085	0.00011533	0.565453
ENST00000617178.4	chr22	312	-1	2006	657	48	1256	POLDIP3	TAA	TAAC	39.7539	2.68004	0	36.6272	0.0198175	0.00407921	0	0.0291618	7.14889
ENST00000369878.9	chr10	526	1	15857	2595	181	13036	CNNM2	TAG	TAGG	14.7402	2.23337	0	12.5069	0.000929572	0.000860642	0	0.000959409	1.11476
ENST00000356511.6	chr1	497	1	1079	858	10	166	PPIE	TAG	TAGA	10.2735	9.82681	0	0	0.0095213	0.0114532	0	0	0
ENST00000400198.8	chr13	257	-1	3363	789	212	2317	ARGLU1	TAA	TAAA	23.227	13.4002	1.34002	8.04012	0.00690663	0.0169838	0.00632085	0.00347006	0.204316
ENST00000329600.7	chr15	477	1	1193	1125	15	8	GDPGP1	TAA	TAAT	0.893346	0.893346	0	0	0.000748824	0.000794086	0	0	0
ENST00000262370.12	chr16	160	1	3930	1698	129	2058	MGRN1	TGA	TGAG	8.93346	4.46673	0	4.02006	0.00227315	0.00263058	0	0.00195338	0.742566
ENST00000392369.6	chr12	919	1	1530	618	518	349	RAN	TGA	TGAG	401.113	292.571	20.547	72.3611	0.262165	0.473416	0.039666	0.207338	0.437962
ENST00000231136.3	chr5	504	1	3266	2352	230	639	PCDHB6	TAA	TAAG	0.446673	0	0	0	0.000136765	0	0	0	0
ENST00000380050.8	chr7	376	1	5171	1377	301	3448	CDK14	TGA	TGAC	119.262	49.5807	1.34002	66.5543	0.0230636	0.0360063	0.00445189	0.0193023	0.53608
ENST00000439945.5	chr2	977	1	1483	1227	199	12	BCS1L	TGA	TGAT	6.25343	6.25343	0	0	0.00421674	0.00509652	0	0	0
ENST00000366933.5	chr1	1681	1	5798	1053	29	4671	SPATA17	TAA	TAAA	1.34002	1.34002	0	0	0.000231118	0.00127257	0	0	0
ENST00000424576.6	chr12	787	-1	1074	834	180	15	RPL6	TAA	TAAA	1069.34	1015.73	20.1003	0	0.995657	1.21791	0.111668	0	0
ENST00000584027.8	chr1	1031	-1	5034	3303	69	1617	NBPF9	TAA	TAAG	30.3738	19.6536	0.446673	10.2735	0.00603373	0.00595023	0.00647353	0.00635342	1.06776
ENST00000380680.4	chr13	60	-1	4384	321	1140	2878	UBL3	TAA	TAAA	40.2006	12.5069	8.48679	18.7603	0.00916984	0.0389622	0.00744455	0.00651851	0.167304
ENST00000287497.13	chr16	411	1	3656	3426	69	116	ITGAM	TAG	TAGC	0.446673	0.446673	0	0	0.000122175	0.000130377	0	0	0
ENST00000381844.8	chr2	29	-1	2216	705	158	1308	YWHAQ	TAA	TAAA	805.352	366.719	4.91341	419.873	0.363426	0.520168	0.0310975	0.321004	0.617115
ENST00000301717.8	chr16	67	-1	1449	1035	27	342	SPSB3	TGA	TGAC	2.23337	1.78669	0	0.446673	0.00154132	0.00172627	0	0.00130606	0.756579
ENST00000377113.6	chr10	88	-1	3799	378	440	2936	CASC10	TGA	TGAA	2.68004	0	0	2.68004	0.000705459	0	0	0.00091282	0
ENST00000596536.5	chr19	466	1	3204	2637	277	245	FCHO1	TGA	TGAA	1.78669	1.34002	0	0.446673	0.000557644	0.000508161	0	0.00182316	3.58776
ENST00000219204.8	chr16	495	1	1969	459	103	1362	ARL2BP	TAG	TAGG	55.3875	11.1668	0.893346	41.5406	0.0281298	0.0243286	0.00867327	0.0304997	1.25366
ENST00000404914.8	chr2	1144	1	2797	1149	16	1587	ATG4B	TGA	TGAA	19.6536	11.6135	0.893346	7.14677	0.00702668	0.0101075	0.0558342	0.00450332	0.445543
ENST00000332496.10	chr15	475	1	3781	2481	234	1021	SEMA4B	TGA	TGAG	3.12671	2.23337	0	0.893346	0.000826954	0.000900188	0	0.000874972	0.971988
ENST00000314425.9	chrX	339	-1	5536	4080	125	1286	ZMYM3	TGA	TGAG	15.1869	8.04012	0.446673	6.7001	0.0027433	0.00197062	0.00357339	0.00521003	2.64386
ENST00000418331.7	chr11	368	1	7845	3981	348	3471	PTPRJ	TAA	TAAT	206.363	76.8278	0	128.195	0.026305	0.0192986	0	0.0369332	1.91378
ENST00000244050.3	chr20	359	1	1705	762	74	824	SNAI1	TGA	TGAC	0.446673	0.446673	0	0	0.000261978	0.000586185	0	0	0
ENST00000614691.1	chr12	458	1	1368	798	71	454	METTL7B	TAG	TAGC	1.34002	0.446673	0	0.893346	0.000979547	0.000559741	0	0.00196772	3.51542
ENST00000506784.5	chr1	1601	1	2143	1482	214	402	CDK18	TGA	TGAG	0.893346	0.446673	0	0.446673	0.000416867	0.000301399	0	0.00111113	3.68657
ENST00000355673.8	chr12	522	1	4202	2979	270	908	MBD6	TAG	TAGC	8.48679	2.23337	0.893346	4.46673	0.0020197	0.000749703	0.00330869	0.00491931	6.56167
ENST00000358365.7	chr17	366	1	3297	2043	221	988	RHOT1	TGA	TGAT	29.0338	24.567	0	3.57339	0.00880611	0.012025	0	0.00361679	0.300773
ENST00000302625.5	chr2	985	1	2508	1071	160	1232	CDK5R2	TAG	TAGG	0.446673	0	0	0.446673	0.000178099	0	0	0.000362559	0
ENST00000302472.4	chr5	108	1	3431	1434	601	1351	PTGER4	TAA	TAAT	3.57339	1.78669	0.446673	1.34002	0.0010415	0.00124595	0.000743217	0.000991872	0.796077
ENST00000309083.7	chr12	63	1	1181	276	365	495	PTMS	TGA	TGAG	109.435	41.5406	3.57339	61.1942	0.092663	0.150509	0.0097901	0.123625	0.821375
ENST00000055077.8	chr7	310	-1	1685	1032	10	598	RFC2	TAG	TAGA	32.1605	19.2069	0	11.1668	0.0190863	0.0186114	0	0.0186736	1.00334
ENST00000303592.3	chr22	245	-1	2065	1305	253	462	KCNJ4	TGA	TGAC	0.446673	0.446673	0	0	0.000216307	0.000342278	0	0	0
ENST00000373001.4	chr1	488	-1	2681	1167	120	1349	RRAGC	TAG	TAGT	22.3337	4.46673	0	17.8669	0.00833035	0.00382753	0	0.0132446	3.46034
ENST00000369489.10	chr1	962	-1	1086	720	48	273	CD58	TGA	TGAT	1.78669	1.78669	0	0	0.00164521	0.00248152	0	0	0
ENST00000354725.8	chr7	615	1	3448	2700	174	529	SND1	TAA	TAAG	73.2544	55.3875	1.78669	15.6336	0.0212455	0.0205139	0.0102684	0.0295531	1.44064
ENST00000301399.11	chr19	1087	-1	3074	1425	360	1244	ZNF577	TAA	TAAA	2.68004	1.34002	0.893346	0.446673	0.000871841	0.000940365	0.00248152	0.000359062	0.381833
ENST00000508192.5	chr11	559	1	2924	2142	496	241	MARK2	TAA	TAAC	6.7001	6.25343	0	0.446673	0.00229142	0.00291943	0	0.00185342	0.634855
ENST00000260118.7	chr8	282	-1	1248	924	32	247	GGH	TGA	TGAA	15.1869	14.2935	0	0.893346	0.012169	0.0154692	0	0.00361679	0.233806
ENST00000285273.8	chr17	750	-1	2914	954	1106	809	CA10	TAG	TAGG	0.446673	0	0.446673	0	0.000153285	0	0.000403864	0	0
ENST00000399849.4	chr17	30	1	3156	2112	154	845	HIC1	TAG	TAGA	3.12671	0.893346	0	2.23337	0.00099072	0.000422986	0	0.00264304	6.24852
ENST00000651870.1	chr18	20	-1	3372	1317	180	1830	ZBTB14	TAG	TAGA	19.2069	9.82681	0	9.38014	0.00569601	0.00746151	0	0.00512576	0.68696
ENST00000265433.7	chr8	373	-1	4666	2232	149	2240	NBN	TAA	TAAC	245.67	112.562	2.23337	126.855	0.0526512	0.0504309	0.014989	0.0566318	1.12296
ENST00000399926.5	chr21	39	1	749	396	192	116	MAP3K7CL	TAA	TAAC	0.893346	0.893346	0	0	0.00119272	0.00225593	0	0	0
ENST00000287706.8	chr16	220	-1	1210	900	97	168	NTAN1	TAA	TAAA	75.9345	68.341	0	5.80675	0.0627557	0.0759345	0	0.034564	0.455182
ENST00000397117.5	chr3	44	-1	1603	822	586	150	SEC13	TAA	TAAC	28.5871	24.567	1.78669	0.893346	0.0178335	0.0298869	0.00304896	0.00595564	0.199273
ENST00000561421.5	chr15	413	1	1549	1227	152	125	FAH	TGA	TGAG	4.46673	4.46673	0	0	0.00288362	0.00364037	0	0	0
ENST00000159087.7	chr19	453	-1	4178	3666	179	288	ANO8	TAG	TAGC	4.02006	3.57339	0	0.446673	0.000962197	0.000974737	0	0.00155095	1.59115
ENST00000376292.8	chr11	779	-1	1500	1059	216	180	KLHL35	TGA	TGAT	0.446673	0.446673	0	0	0.000297782	0.000421788	0	0	0
ENST00000329654.8	chr1	710	1	3998	2178	181	1594	PDE4B	TAA	TAAT	8.04012	2.23337	0	5.80675	0.00201104	0.00102542	0	0.00364288	3.55257
ENST00000436949.5	chr7	354	-1	2550	2283	158	64	SEMA3A	TGA	TGAG	130.875	121.495	4.02006	2.23337	0.0513236	0.0532173	0.0254434	0.0348963	0.655733
ENST00000380752.10	chr13	59	-1	7343	1857	381	5060	SLC7A1	TGA	TGAC	288.998	30.3738	2.23337	256.39	0.0393569	0.0163564	0.00586185	0.05067	3.09788
ENST00000267202.7	chr12	882	-1	2706	825	56	1780	VPS37B	TGA	TGAG	33.0538	3.57339	0	29.4804	0.012215	0.00433138	0	0.016562	3.82374
ENST00000511809.5	chr4	156	-1	830	132	184	469	SMIM14	TGA	TGAT	2.68004	0.446673	0.446673	1.78669	0.00322896	0.00338389	0.00242757	0.00380958	1.1258
ENST00000411851.3	chr19	109	-1	1494	1191	208	50	TBXA2R	TGA	TGAA	0.446673	0.446673	0	0	0.000298978	0.000375041	0	0	0
ENST00000341142.7	chr2	1009	1	1524	1230	66	183	GMPPA	TGA	TGAG	8.48679	7.59345	0.893346	0	0.00556876	0.00617353	0.0135356	0	0
ENST00000262288.7	chr17	766	1	1942	1326	49	522	SCPEP1	TAG	TAGG	7.14677	4.02006	0	2.68004	0.00368011	0.00303172	0	0.00513418	1.69349
ENST00000369893.10	chr10	521	1	6770	936	65	5724	SFXN2	TAA	TAAA	3.57339	0.893346	0	2.23337	0.000527827	0.00095443	0	0.000390176	0.408805
ENST00000261733.7	chr12	780	1	9561	1521	44	7951	ALDH2	TAA	TAAG	3.12671	0.893346	0	2.23337	0.000327028	0.000587342	0	0.000280891	0.478242
ENST00000505036.5	chr4	524	-1	809	198	397	169	NDUFC1	TAA	TAAA	10.7202	7.59345	1.34002	0.446673	0.0132511	0.0383507	0.00337536	0.00264304	0.0689175
ENST00000535286.5	chr13	183	1	2579	2202	66	266	TDRD3	TAA	TAAT	5.80675	5.36008	0	0.446673	0.00225155	0.00243419	0	0.00167922	0.68985
ENST00000569748.5	chr16	633	-1	4554	2436	904	1169	AP1G1	TGA	TGAG	64.7676	18.7603	1.34002	44.2207	0.0142221	0.00770126	0.00148232	0.0378278	4.91189
ENST00000305536.11	chrX	586	1	1823	936	40	802	RBMX2	TGA	TGAA	16.5269	9.82681	0.893346	5.36008	0.00906578	0.0104987	0.0223337	0.00668339	0.63659
ENST00000219299.8	chr16	518	1	5272	1101	73	4053	CCDC113	TAG	TAGC	4.46673	0.893346	0	3.57339	0.000847256	0.000811396	0	0.000881664	1.0866
ENST00000280800.5	chr12	800	1	4787	1737	8	2997	PLBD2	TGA	TGAA	6.25343	1.78669	0	4.46673	0.00130633	0.00102861	0	0.0014904	1.44895
ENST00000434634.6	chr15	444	-1	5387	1104	55	4183	WDR73	TGA	TGAC	28.1404	6.25343	0	20.547	0.00522376	0.00566433	0	0.00491202	0.867183
ENST00000371847.8	chr1	618	-1	5003	1434	190	3334	SPATA6	TGA	TGAG	25.4604	15.1869	0.446673	9.82681	0.00508902	0.0105906	0.00235091	0.00294745	0.278309
ENST00000379079.7	chr11	281	-1	2469	876	271	1277	WT1	TGA	TGAG	0.446673	0.446673	0	0	0.000180913	0.000509901	0	0	0
ENST00000216452.9	chr14	303	-1	1394	534	59	756	PIGH	TGA	TGAG	13.8469	8.48679	0	5.36008	0.00993319	0.0158929	0	0.00709005	0.446115
ENST00000374296.3	chr1	314	-1	3297	1008	661	1583	PAQR7	TGA	TGAA	3.12671	0.446673	0	2.68004	0.000948351	0.000443128	0	0.00169301	3.82059
ENST00000394767.3	chr4	430	-1	5569	1071	445	4008	CXXC4	TAA	TAAA	12.5069	1.78669	0	10.7202	0.0022458	0.00166825	0	0.00267469	1.60329
ENST00000440460.6	chr11	937	1	5897	2019	291	3542	DIXDC1	TAA	TAAT	19.6536	4.02006	0.446673	15.1869	0.00333282	0.00199111	0.00153496	0.00428766	2.1534
ENST00000600449.8	chrX	672	-1	2720	1020	206	1449	TMEM185A	TAG	TAGA	1.78669	0.893346	0	0.446673	0.000656872	0.00087583	0	0.000308263	0.351967
ENST00000409465.5	chr2	844	-1	3097	2220	426	406	STAT1	TAG	TAGA	41.5406	28.1404	2.23337	10.7202	0.0134132	0.0126759	0.00524264	0.0264043	2.08304
ENST00000625129.1	chr10	515	-1	1469	609	206	609	C10orf95	TGA	TGAA	0.446673	0	0	0.446673	0.000304066	0	0	0.000733454	0
ENST00000304191.4	chr15	433	1	1565	324	212	984	RAMAC	TGA	TGAT	24.567	9.38014	10.7202	1.78669	0.0156978	0.028951	0.0505668	0.00181574	0.0627178
ENST00000426726.8	chr17	631	1	2005	1308	226	426	RUNDC3A	TGA	TGAG	5.36008	4.46673	0.446673	0.446673	0.00267336	0.00341493	0.00197643	0.00104853	0.307042
ENST00000319286.6	chr8	499	1	3278	1557	151	1525	ZNF572	TGA	TGAG	3.57339	2.23337	0.446673	0.893346	0.00109011	0.0014344	0.0029581	0.000585801	0.408393
ENST00000359901.8	chr2	475	-1	4297	4029	30	193	ANKRD36B	TAG	TAGA	6.25343	5.80675	0.446673	0	0.0014553	0.00144124	0.0148891	0	0
ENST00000636934.1	chr8	5	1	1790	618	203	924	CLN8	TAG	TAGG	2.68004	1.78669	0.893346	0	0.00149723	0.00289109	0.00440072	0	0
ENST00000374259.7	chrX	334	1	3301	1485	326	1445	FOXO4	TGA	TGAG	4.46673	2.68004	0.446673	1.34002	0.00135315	0.00180474	0.00137016	0.000927349	0.513841
ENST00000619396.4	chr19	178	-1	2226	2103	68	10	KHSRP	TGA	TGAA	60.3009	60.3009	0	0	0.0270893	0.0286737	0	0	0
ENST00000581312.6	chr1	1047	-1	8922	2499	339	6039	OTUD7B	TGA	TGAA	60.7476	8.93346	0.446673	51.3674	0.00680874	0.00357482	0.00131762	0.00850595	2.37941
ENST00000376266.9	chr6	215	-1	2625	2316	117	147	CCHCR1	TAA	TAAG	4.02006	3.57339	0	0	0.00153145	0.00154291	0	0	0
ENST00000438704.6	chr4	641	-1	1032	597	17	373	HMGB2	TAA	TAAA	291.678	274.257	4.91341	0.893346	0.282633	0.459393	0.289024	0.00239503	0.00521347
ENST00000426621.6	chr22	243	1	2216	462	90	1619	MAFF	TAG	TAGT	7.14677	0	0	7.14677	0.00322508	0	0	0.00441431	0
ENST00000373664.7	chr20	239	-1	5684	3174	61	2404	RBL1	TAA	TAAT	33.0538	16.9736	0	16.0802	0.00581524	0.00534769	0	0.00668895	1.25081
ENST00000449193.6	chr10	89	-1	6598	2694	2247	1612	SKIDA1	TAA	TAAA	0.446673	0	0	0.446673	6.76983e-05	0	0	0.000277093	0
ENST00000308736.7	chr12	908	-1	4559	3441	103	970	DHX37	TGA	TGAC	6.25343	4.91341	0	1.34002	0.00137167	0.0014279	0	0.00138146	0.967479
ENST00000295666.6	chr4	233	-1	1427	816	28	538	IGFBP7	TAA	TAAA	6.7001	6.7001	0	0	0.00469523	0.00821091	0	0	0
ENST00000442039.3	chr16	54	-1	917	366	18	488	C16orf91	TGA	TGAC	8.48679	4.46673	0.446673	3.57339	0.00925495	0.0122042	0.0248152	0.00732251	0.6
ENST00000258729.8	chr7	114	-1	4274	1707	375	2147	IGF2BP3	TAA	TAAA	625.789	276.937	5.36008	322.945	0.146418	0.162236	0.0142935	0.150417	0.927146
ENST00000299927.4	chr15	447	1	7863	3771	16	4031	ZNF592	TGA	TGAC	68.341	28.1404	0	39.7539	0.00869147	0.00746232	0	0.00986205	1.32158
ENST00000277632.8	chr10	70	-1	2364	1305	202	812	MINDY3	TAA	TAAT	21.4403	19.2069	0.893346	1.34002	0.00906951	0.014718	0.00442251	0.00165027	0.112126
ENST00000273691.7	chr3	576	-1	2659	1476	100	1038	ILDR1	TAG	TAGT	0.446673	0	0	0.446673	0.000167985	0	0	0.000430321	0
ENST00000408995.5	chr2	523	-1	1367	807	99	416	FHL2	TGA	TGAA	18.3136	9.38014	0.893346	8.04012	0.0133969	0.0116235	0.0090237	0.0193272	1.66277
ENST00000358438.6	chr7	519	-1	2065	444	22	1554	POLR2J2	TGA	TGAG	0.893346	0	0	0.893346	0.000432613	0	0	0.000574869	0
ENST00000310496.9	chr17	1040	-1	1865	963	39	818	RFNG	TGA	TGAC	4.46673	1.34002	0	3.12671	0.00239503	0.00139151	0	0.00382239	2.74694
ENST00000361198.9	chr10	505	-1	2285	1095	618	527	LDB1	TAA	TAAA	20.9936	12.5069	1.34002	6.25343	0.00918759	0.0114218	0.00216832	0.0118661	1.0389
ENST00000262982.3	chr20	349	1	3550	2883	117	505	CSE1L	TAA	TAAA	133.555	121.048	5.80675	4.91341	0.0376212	0.041987	0.0496304	0.00972952	0.231727
ENST00000339077.10	chr7	110	1	5619	1728	236	3610	KLHL7	TGA	TGAA	14.2935	12.0602	0.446673	1.78669	0.00254379	0.00697927	0.00189268	0.000494929	0.0709141
ENST00000302274.7	chr4	457	-1	3090	765	335	1945	ELOVL6	TAG	TAGT	216.19	38.4139	8.48679	160.802	0.0699644	0.0502142	0.0253337	0.0826747	1.64644
ENST00000358430.8	chr6	798	-1	4612	2022	86	2459	TXLNB	TAA	TAAG	0.446673	0	0.446673	0	9.68502e-05	0	0.00519387	0	0
ENST00000424469.2	chr15	492	1	2705	2046	47	567	SLCO3A1	TGA	TGAG	1.78669	1.78669	0	0	0.000660515	0.000873261	0	0	0
ENST00000368468.4	chr6	717	-1	5018	1929	436	2608	MAN1A1	TAA	TAAA	23.6737	6.7001	0	16.5269	0.00471775	0.00347335	0	0.00633701	1.82446
ENST00000225698.8	chr17	101	-1	1169	816	76	232	C1QBP	TAG	TAGA	90.6747	73.2544	0.446673	5.80675	0.077566	0.0897726	0.00587728	0.0250291	0.278806
ENST00000210060.12	chr19	338	-1	1345	1077	108	115	DHPS	TGA	TGAG	6.7001	6.25343	0.446673	0	0.00498149	0.00580634	0.00413586	0	0
ENST00000290649.10	chr16	472	-1	3607	1899	212	1451	AMFR	TAG	TAGC	142.042	75.4878	0	65.661	0.0393796	0.0397513	0	0.0452522	1.13838
ENST00000376087.4	chr10	112	-1	6591	5100	160	1286	ANKRD26	TGA	TGAA	37.5206	33.9472	0	3.57339	0.00569269	0.00665631	0	0.00277868	0.417451
ENST00000310571.7	chr11	758	1	4994	1146	47	3756	PAAF1	TGA	TGAC	7.14677	1.78669	0	4.91341	0.00143107	0.00155907	0	0.00130815	0.839058
ENST00000230050.4	chr6	765	1	503	366	76	16	RPS12	TGA	TGAA	648.57	469.9	136.235	0	1.2894	1.28388	1.79257	0	0
ENST00000361684.8	chr22	244	-1	3593	1191	218	2139	TMEM184B	TAG	TAGG	29.0338	10.7202	0.446673	17.4203	0.00808065	0.00900097	0.00204896	0.00814411	0.904804
ENST00000359827.7	chr7	654	-1	13786	5652	957	7132	PLXNA4	TGA	TGAG	2.68004	0.446673	0	2.23337	0.000194403	7.90292e-05	0	0.000313147	3.96242
ENST00000618612.4	chr20	22	-1	1518	261	168	1044	FKBP1A	TGA	TGAA	94.6947	35.7339	0	54.4941	0.0623812	0.136911	0	0.0521974	0.38125
ENST00000398814.8	chr15	347	1	2750	2235	388	82	CCDC33	TGA	TGAG	0.446673	0.446673	0	0	0.000162427	0.000199854	0	0	0
ENST00000383794.7	chr3	73	1	2940	1371	69	1455	CCDC174	TGA	TGAT	5.36008	2.68004	0	2.68004	0.00182316	0.00195481	0	0.00184195	0.942268
ENST00000215659.13	chr22	364	-1	1778	1071	168	494	MAPK12	TGA	TGAA	17.8669	12.0602	0	5.80675	0.0100489	0.0112607	0	0.0117546	1.04386
ENST00000559107.5	chr15	518	-1	1353	597	17	694	TM2D3	TGA	TGAC	2.23337	2.23337	0	0	0.00165068	0.00374098	0	0	0
ENST00000436587.6	chr7	62	1	6235	1059	217	4914	C1GALT1	TGA	TGAA	35.2872	13.8469	0.446673	19.6536	0.00565953	0.0130754	0.0020584	0.00399952	0.30588
ENST00000602748.5	chr7	754	1	3054	2298	274	437	CUL1	TAA	TAAC	37.0739	26.8004	2.68004	7.59345	0.0121394	0.0116625	0.00978117	0.0173763	1.48993
ENST00000374007.5	chr10	207	1	3715	450	778	2442	ASAH2B	TAG	TAGT	16.5269	0	2.23337	14.2935	0.0044487	0	0.00287065	0.00585321	0
ENST00000523037.6	chr5	613	1	3173	588	32	2508	MRPL22	TGA	TGAT	6.25343	6.25343	0	0	0.00197082	0.0106351	0	0	0
ENST00000349830.8	chr8	6	1	5648	4002	229	1372	ARHGEF10	TAA	TAAG	16.5269	12.9535	0.446673	3.12671	0.00292615	0.00323676	0.00195054	0.00227895	0.704082
ENST00000262803.9	chr19	499	1	5348	3324	266	1713	UPF1	TAA	TAAA	20.547	4.46673	0	16.0802	0.00384199	0.00134378	0	0.00938718	6.98564
ENST00000354190.10	chr11	754	1	1977	699	22	1211	PLEKHB1	TGA	TGAG	2.68004	1.34002	0	1.34002	0.00135561	0.00191705	0	0.00110654	0.577209
ENST00000441493.7	chr22	12	-1	9447	5976	349	3077	MICAL3	TGA	TGAG	24.567	8.48679	0	16.0802	0.00260051	0.00142015	0	0.00522595	3.67987
ENST00000409968.6	chr2	660	1	6112	4788	172	1107	THSD7B	TAA	TAAT	0.893346	0.446673	0	0.446673	0.000146163	9.32902e-05	0	0.000403499	4.3252
ENST00000263346.13	chr16	758	1	2248	1998	70	135	TCF25	TGA	TGAG	15.1869	14.7402	0	0.446673	0.00675573	0.00737749	0	0.00330869	0.448485
ENST00000649800.1	chr1	600	-1	2809	1365	238	1161	MKNK1	TGA	TGAA	6.25343	1.34002	1.78669	3.12671	0.00222621	0.000981699	0.00750711	0.00269312	2.74332
ENST00000370475.8	chrX	665	1	4308	1866	122	2275	FMR1	TAA	TAAA	40.2006	17.4203	0	21.4403	0.00933161	0.00933561	0	0.00942431	1.0095
ENST00000293471.11	chr19	1089	1	3165	1821	421	878	ZNF613	TAA	TAAA	4.91341	4.46673	0	0	0.00155242	0.0024529	0	0	0
ENST00000433477.4	chr4	596	-1	2903	933	13	1912	CTSO	TGA	TGAC	0.446673	0	0	0	0.000153866	0	0	0	0
ENST00000310397.13	chr2	1133	1	8394	4209	214	3926	SNED1	TAA	TAAG	6.25343	2.23337	0	4.02006	0.000744988	0.000530617	0	0.00102396	1.92975
ENST00000445724.3	chr21	196	-1	2497	396	281	1775	PTTG1IP	TAG	TAGA	265.324	23.6737	1.34002	238.077	0.106257	0.059782	0.00476875	0.134128	2.24361
ENST00000263681.6	chr11	768	1	3821	1368	123	2285	POLD3	TAA	TAAA	46.0073	15.1869	1.78669	28.1404	0.0120407	0.0111015	0.014526	0.0123153	1.10933
ENST00000243082.4	chr12	427	1	2039	1104	108	782	HOXC11	TGA	TGAA	2.23337	0.893346	0	1.34002	0.00109532	0.000809191	0	0.00171358	2.11765
ENST00000369592.1	chr10	553	-1	1110	684	299	82	SMNDC1	TAA	TAAT	15.1869	15.1869	0	0	0.0136819	0.0222031	0	0	0
ENST00000613478.1	chr17	447	1	2074	351	118	1560	CISD3	TGA	TGAG	4.02006	1.34002	0	2.68004	0.00193831	0.00381772	0	0.00171797	0.45
ENST00000424789.6	chr17	820	1	11721	5940	-2	5738	TANC2	TAA	TAAA	59.8542	12.9535	59.8542	46.9007	0.00510658	0.00218073	-29.9271	0.0081737	3.74815
ENST00000553393.5	chr15	494	-1	495	81	159	210	FAM174B	TGA	TGAA	0.446673	0	0.446673	0	0.00090237	0	0.00280927	0	0
ENST00000225430.9	chr17	459	1	737	558	56	78	RPL19	TAA	TAAA	1520.03	1386.92	67.8943	0	2.06245	2.48552	1.2124	0	0
ENST00000257910.8	chr12	532	1	3678	600	110	2923	TSPAN31	TGA	TGAG	12.5069	1.78669	0	10.7202	0.00340045	0.00297782	0	0.00366752	1.23161
ENST00000302558.7	chr2	558	-1	5576	5265	186	80	RGPD8	TGA	TGAG	7.14677	7.14677	0	0	0.0012817	0.00135741	0	0	0
ENST00000392993.7	chr3	716	-1	9815	1557	124	8089	GK5	TAA	TAAC	100.055	7.59345	0	92.4614	0.0101941	0.00487697	0	0.0114305	2.34377
ENST00000548825.6	chr12	330	1	3307	2646	149	467	PRPF40B	TGA	TGAC	5.80675	4.46673	0	0.893346	0.0017559	0.00168811	0	0.00191295	1.13319
ENST00000320316.8	chr17	127	-1	1978	1179	172	582	PHF23	TGA	TGAT	15.6336	9.38014	0	6.25343	0.00790372	0.00795601	0	0.0107447	1.35052
ENST00000268603.9	chr16	527	-1	6722	2358	475	3844	CDH11	TAA	TAAC	79.9545	43.774	6.7001	29.4804	0.0118945	0.018564	0.0141055	0.00766921	0.413122
ENST00000519948.3	chr12	599	1	7604	261	280	7018	ATXN7L3B	TAG	TAGC	129.982	7.59345	3.12671	117.475	0.0170939	0.0290937	0.0111668	0.0167391	0.575352
ENST00000299237.2	chr16	513	-1	4221	1716	617	1843	ZNF319	TGA	TGAC	3.57339	0.893346	0	2.68004	0.000846573	0.000520598	0	0.00145417	2.79327
ENST00000449934.7	chr6	220	1	1370	966	32	327	MICA	TAA	TAAG	3.12671	0.893346	0	2.23337	0.00228227	0.000924789	0	0.00682987	7.38532
ENST00000328459.11	chr14	426	-1	19471	2499	129	16798	TTC7B	TGA	TGAG	28.1404	22.7803	0	5.36008	0.00144525	0.00911578	0	0.00031909	0.0350042
ENST00000372393.7	chr9	563	1	1548	1206	69	228	ASS1	TAG	TAGA	19.2069	17.8669	0	0.893346	0.0124076	0.014815	0	0.00391819	0.264474
ENST00000426216.6	chr18	236	1	4361	3411	11	894	ATP9B	TAA	TAAG	4.02006	2.23337	0	1.78669	0.00092182	0.000654754	0	0.00199854	3.05235
ENST00000361432.3	chr10	601	1	2441	1041	24	1331	FAM45A	TGA	TGAC	12.5069	7.59345	0.446673	4.46673	0.00512366	0.00729438	0.0186114	0.00335592	0.46007
ENST00000209873.9	chr12	414	-1	1815	1608	139	23	AAAS	TAA	TAAG	7.14677	7.14677	0	0	0.00393762	0.00444451	0	0	0
ENST00000262844.10	chrX	497	-1	5350	969	8	4328	AMMECR1	TGA	TGAC	140.255	16.9736	0	122.835	0.026216	0.0175166	0	0.0283815	1.62026
ENST00000478753.4	chr16	377	-1	2551	1314	448	744	SEPHS2	TGA	TGAG	21.4403	9.82681	0	11.6135	0.00840467	0.00747855	0	0.0156095	2.08724
ENST00000291232.4	chr22	299	-1	3944	522	39	3338	TNFRSF13C	TAG	TAGC	0.446673	0.446673	0	0	0.000113254	0.000855696	0	0	0
ENST00000515763.1	chr5	281	1	347	138	77	87	COX7C	TGA	TGAA	104.968	44.2207	40.2006	0.893346	0.302502	0.32044	0.522086	0.0102684	0.0320446
ENST00000267430.10	chr14	182	1	7131	6114	96	876	FANCM	TAA	TAAT	26.3537	24.1204	0.446673	1.78669	0.00369566	0.0039451	0.00465285	0.0020396	0.516996
ENST00000325722.8	chr1	447	-1	4777	3117	219	1396	KIAA0319L	TAG	TAGC	20.9936	12.9535	0.446673	7.59345	0.00439473	0.00415577	0.0020396	0.00543943	1.30889
ENST00000537449.5	chr5	119	1	4419	1884	42	2448	GHR	TAG	TAGC	4.02006	2.23337	0	1.78669	0.000909721	0.00118544	0	0.000729858	0.615686
ENST00000361762.3	chr4	136	1	6403	3177	1002	2179	PCDH7	TGA	TGAA	67.8943	49.5807	3.12671	14.7402	0.0106035	0.0156061	0.00312047	0.00676467	0.433462
ENST00000409218.5	chr2	234	-1	648	408	132	63	MCFD2	TAG	TAGA	41.9873	32.1605	0.893346	5.36008	0.0647952	0.0788247	0.00676778	0.0850806	1.07937
ENST00000326446.9	chr2	688	1	2805	648	705	1407	ARL6IP6	TAA	TAAA	35.7339	23.6737	0	9.38014	0.0127393	0.0365335	0	0.00666676	0.182484
ENST00000228136.9	chr11	215	1	3920	519	126	3230	C11orf58	TAA	TAAC	122.835	76.3811	8.93346	32.1605	0.0313355	0.14717	0.0709005	0.0099568	0.0676552
ENST00000292841.9	chr19	667	-1	8618	2277	253	6043	ZNF585A	TGA	TGAG	12.5069	4.46673	4.91341	1.34002	0.00145125	0.00196167	0.0194206	0.000221747	0.11304
ENST00000399756.8	chr17	48	-1	4068	2487	521	1015	TRPV1	TGA	TGAG	2.23337	1.78669	0	0.446673	0.000549008	0.000718413	0	0.000440072	0.612562
ENST00000237305.11	chr6	770	-1	2401	1263	83	1010	SGK1	TGA	TGAA	17.8669	14.7402	0	3.12671	0.00744145	0.0116708	0	0.00309576	0.265257
ENST00000373654.1	chr9	468	-1	2047	1293	206	503	ZBTB26	TGA	TGAG	3.12671	2.68004	0	0	0.00152746	0.00207273	0	0	0
ENST00000224652.10	chr10	614	-1	4930	1524	108	3253	ATE1	TGA	TGAC	76.8278	33.0538	0	43.3273	0.0155837	0.0216889	0	0.0133192	0.614103
ENST00000518235.5	chr5	762	-1	1244	657	4	538	MRNIP	TAA	TAAA	0.893346	0.893346	0	0	0.000718124	0.00135974	0	0	0
ENST00000513140.5	chr4	164	-1	4166	2178	464	1479	APBB2	TAG	TAGC	18.7603	6.7001	1.78669	10.2735	0.00450319	0.00307626	0.00385063	0.00694624	2.25801
ENST00000323060.3	chr19	887	-1	2250	510	72	1623	OPA3	TAG	TAGG	0.893346	0	0.893346	0	0.000397043	0	0.0124076	0	0
ENST00000327473.9	chr19	143	1	3816	528	111	3132	TNFAIP8L1	TGA	TGAA	5.36008	0	0	5.36008	0.00140463	0	0	0.00171139	0
ENST00000374467.4	chr6	311	-1	2170	603	277	1245	BAK1	TGA	TGAC	8.04012	1.34002	0	6.7001	0.00370512	0.00222225	0	0.00538161	2.42169
ENST00000259526.4	chr8	472	1	2463	1041	81	1296	CCN3	TAA	TAAC	0.446673	0.446673	0	0	0.000181353	0.000429081	0	0	0
ENST00000285605.8	chr10	454	1	3213	489	141	2538	MARVELD1	TGA	TGAG	75.9345	1.78669	0	74.1478	0.0236335	0.00365377	0	0.029215	7.99586
ENST00000345165.9	chr16	33	-1	1598	1380	83	90	CCDC78	TAG	TAGG	0.446673	0.446673	0	0	0.00027952	0.000323676	0	0	0
ENST00000320285.9	chr6	889	-1	7923	1104	207	6567	AGPAT4	TGA	TGAC	7.59345	0.446673	0	7.14677	0.000958405	0.000404595	0	0.00108829	2.68981
ENST00000446558.5	chr2	956	1	495	195	14	241	RPL37A	TAA	TAAC	963.028	648.57	194.303	0	1.94551	3.326	13.8788	0	0
ENST00000322716.7	chr3	142	-1	8126	1791	85	6205	EPM2AIP1	TAA	TAAG	82.1879	20.547	0	60.7476	0.0101142	0.0114723	0	0.0097901	0.853365
ENST00000617612.2	chr11	318	1	1247	336	262	604	C11orf96	TAA	TAAG	0.446673	0.446673	0	0	0.000358198	0.00132938	0	0	0
ENST00000395116.1	chr14	254	-1	4578	1452	110	2971	GPR135	TAA	TAAG	0.446673	0	0	0.446673	9.75695e-05	0	0	0.000150344	0
ENST00000223023.5	chr7	602	-1	4363	1485	263	2570	WASL	TGA	TGAT	67.8943	15.1869	1.34002	50.9207	0.0155614	0.0102269	0.00509513	0.0198135	1.9374
ENST00000393010.6	chr3	709	1	3160	1410	272	1433	PXYLP1	TAA	TAAA	12.5069	8.48679	0	4.02006	0.00395786	0.006019	0	0.00280534	0.466081
ENST00000358065.4	chr3	8	1	2443	2022	61	315	SETMAR	TAA	TAAT	8.48679	8.48679	0	0	0.00347392	0.00419723	0	0	0
ENST00000415061.8	chr19	1170	-1	1870	963	110	752	RDH13	TAA	TAAC	6.25343	4.46673	0	1.78669	0.00334408	0.00463835	0	0.00237592	0.512234
ENST00000569453.5	chr16	759	1	1852	1323	387	97	DEF8	TAG	TAGC	11.1668	10.2735	0.446673	0	0.00602961	0.00776529	0.00115419	0	0
ENST00000379405.3	chr9	120	1	834	711	33	45	PRSS3	TAA	TAAA	11.6135	11.6135	0	0	0.0139251	0.016334	0	0	0
ENST00000256737.8	chr11	261	1	5937	2913	140	2839	ANO3	TAG	TAGT	0.446673	0.446673	0	0	7.52355e-05	0.000153338	0	0	0
ENST00000369762.7	chrX	746	1	2054	1380	10	619	ATP6AP1	TGA	TGAC	8.04012	3.57339	0	4.46673	0.00391437	0.00258941	0	0.00721605	2.78675
ENST00000302754.6	chr19	346	1	1830	1011	280	494	JUNB	TGA	TGAA	8.48679	5.80675	1.34002	0.893346	0.00463759	0.00574357	0.00478578	0.00180839	0.314855
ENST00000299957.11	chr15	147	1	3974	1278	305	2346	CASC4	TAA	TAAG	191.176	58.0675	0.446673	132.662	0.0481067	0.0454362	0.0014645	0.0565481	1.24456
ENST00000511685.6	chr4	658	1	10923	8067	144	2667	TENM3	TAA	TAAC	42.434	34.3938	2.23337	5.36008	0.00388483	0.00426352	0.0155095	0.00200978	0.471389
ENST00000265643.4	chr11	705	1	749	339	183	182	GAL	TGA	TGAG	6.7001	5.36008	0	0.893346	0.00894539	0.0158114	0	0.0049085	0.31044
ENST00000330188.13	chr1	1168	-1	2108	714	80	1269	TPM3	TAG	TAGA	841.532	352.425	39.3072	431.933	0.399209	0.493593	0.491341	0.340373	0.689582
ENST00000216297.7	chr14	47	-1	4433	3111	86	1191	SUPT16H	TAA	TAAC	164.822	64.3209	2.68004	95.1414	0.0371808	0.0206753	0.0311632	0.0798836	3.86372
ENST00000589296.5	chr17	981	-1	2159	162	68	1884	CYTH1	TAA	TAAG	18.3136	1.34002	0	16.0802	0.00848245	0.00827173	0	0.00853516	1.03185
ENST00000599612.2	chr19	478	1	1408	588	94	681	MPV17L2	TGA	TGAA	10.7202	1.34002	0	8.48679	0.00761375	0.00227895	0	0.0124622	5.46843
ENST00000372236.8	chr6	440	1	3540	2109	289	1097	POLH	TAG	TAGT	12.0602	6.25343	0	5.80675	0.00340683	0.00296511	0	0.0052933	1.78519
ENST00000615550.5	chr6	525	1	2303	1497	75	686	PRIM2	TAG	TAGG	22.7803	18.3136	0.446673	3.12671	0.00989159	0.0122335	0.00595564	0.00455789	0.372573
ENST00000317005.2	chr4	385	1	2083	1545	152	341	TIGD2	TAA	TAAT	8.04012	8.04012	0	0	0.00385987	0.00520396	0	0	0
ENST00000261590.13	chr18	95	1	5697	3324	69	2259	DSG2	TAA	TAAA	25.907	10.2735	0	15.6336	0.00454749	0.0030907	0	0.00692057	2.23916
ENST00000634607.1	chr7	71	1	3407	2814	414	134	PHF14	TAA	TAAA	49.1341	48.6874	0.446673	0	0.0144215	0.0173018	0.00107892	0	0
ENST00000442196.7	chr15	214	-1	3453	2391	42	975	CCPG1	TGA	TGAT	10.2735	9.38014	0	0.893346	0.00297523	0.0039231	0	0.000916253	0.233553
ENST00000310417.9	chr3	190	-1	1750	1482	141	82	HHATL	TAG	TAGG	0.446673	0.446673	0	0	0.000255242	0.000301399	0	0	0
ENST00000374787.7	chr9	368	1	4266	3561	330	330	SMC2	TAA	TAAA	85.3146	79.0612	1.34002	4.46673	0.0199987	0.022202	0.00406067	0.0135356	0.609656
ENST00000422871.5	chr22	329	1	3462	963	418	2036	PARVG	TGA	TGAC	1.78669	1.78669	0	0	0.000516087	0.00185534	0	0	0
ENST00000249501.4	chr2	786	1	1989	990	249	705	HOXD10	TAG	TAGG	25.907	16.5269	3.12671	6.25343	0.0130252	0.0166938	0.0125571	0.00887011	0.53134
ENST00000370187.8	chr10	495	1	6024	1785	10	4184	BTRC	TAA	TAAA	72.3611	24.1204	0	48.2407	0.0120121	0.0135128	0	0.0115298	0.85325
ENST00000311413.4	chr11	1022	1	2787	1269	590	883	RNF26	TGA	TGAA	38.8606	8.93346	1.34002	28.5871	0.0139435	0.00703977	0.00227122	0.032375	4.59887
ENST00000254901.9	chr5	459	1	2099	726	116	1212	REEP2	TGA	TGAG	5.80675	1.78669	0	4.02006	0.00276644	0.00246101	0	0.00331688	1.34777
ENST00000261658.7	chr16	216	1	2903	1320	135	1403	BFAR	TGA	TGAC	71.9144	29.4804	5.80675	33.9472	0.0247724	0.0223337	0.043013	0.0241961	1.08339
ENST00000312106.5	chr11	642	-1	2619	2310	132	132	CATSPER1	TGA	TGAC	2.23337	2.23337	0	0	0.000852755	0.000966825	0	0	0
ENST00000201586.6	chr19	960	1	1295	1065	172	13	SULT2B1	TAA	TAAT	0.446673	0.446673	0	0	0.000344921	0.000419411	0	0	0
ENST00000333050.7	chr16	180	-1	1439	609	19	766	TMEM186	TGA	TGAA	4.91341	4.02006	0	0.446673	0.00341446	0.00660108	0	0.000583124	0.0883377
ENST00000378164.7	chr8	474	-1	5027	3567	271	1144	TAF2	TGA	TGAG	71.9144	51.8141	2.68004	16.5269	0.0143056	0.014526	0.00988944	0.0144466	0.994537
ENST00000310144.11	chr17	830	1	1331	1188	54	44	PSMC5	TGA	TGAG	15.6336	15.1869	0.446673	0	0.0117457	0.0127836	0.00827173	0	0
ENST00000374700.7	chr2	874	1	4928	3984	89	810	AOX1	TGA	TGAA	0.893346	0.893346	0	0	0.00018128	0.000224234	0	0	0
ENST00000523102.5	chr12	72	-1	1205	759	150	251	SPSB2	TGA	TGAG	0.446673	0.446673	0	0	0.000370683	0.000588502	0	0	0
ENST00000377191.5	chr20	122	1	3408	2820	62	481	XRN2	TAA	TAAG	111.668	108.542	2.23337	0.446673	0.0327665	0.0384899	0.036022	0.000928635	0.0241267
ENST00000320672.8	chr5	272	-1	8780	1053	205	7477	SSBP2	TGA	TGAT	27.2471	14.7402	1.34002	10.7202	0.00310331	0.0139983	0.00653668	0.00143375	0.102423
ENST00000641949.1	chr4	510	-1	1640	732	25	838	MFSD8	TAG	TAGC	2.68004	1.78669	0	0.446673	0.00163417	0.00244084	0	0.000533023	0.218377
ENST00000374051.7	chrX	337	1	3913	2454	316	1098	NLGN3	TAG	TAGC	0.446673	0.446673	0	0	0.000114151	0.000182018	0	0	0
ENST00000371485.7	chr10	410	1	2638	1362	298	933	CEP55	TAG	TAGC	168.842	115.688	8.93346	42.8806	0.064004	0.0849401	0.0299781	0.0459599	0.541087
ENST00000228251.9	chr12	137	-1	1931	1086	206	594	YBX3	TAA	TAAC	280.064	216.637	1.34002	55.3875	0.145036	0.199481	0.00650495	0.0932449	0.467437
ENST00000221566.7	chr19	86	-1	2231	909	58	1219	SGTA	TGA	TGAC	6.7001	2.68004	0	3.12671	0.00300318	0.00294834	0	0.00256498	0.869975
ENST00000301215.7	chr19	797	1	4023	1980	219	1779	ZNF526	TGA	TGAC	4.91341	0	0	4.91341	0.00122133	0	0	0.00276189	0
ENST00000377833.9	chr10	74	-1	11933	10839	46	1003	CUBN	TAA	TAAG	0.893346	0.893346	0	0	7.48635e-05	8.24196e-05	0	0	0
ENST00000645500.1	chr11	871	-1	2880	1602	372	861	CCDC82	TAA	TAAC	18.3136	14.7402	2.68004	0.893346	0.00635889	0.00920113	0.00720441	0.00103757	0.112765
ENST00000338165.8	chr17	732	1	2339	1680	76	538	EME1	TGA	TGAT	7.14677	5.80675	0.446673	0.446673	0.00305548	0.0034564	0.00587728	0.000830248	0.240206
ENST00000234256.4	chr2	292	1	4563	1566	239	2713	SLC1A4	TGA	TGAT	15.6336	4.46673	0	11.1668	0.00342616	0.00285232	0	0.00411605	1.44305
ENST00000539664.2	chr7	143	-1	4935	2403	240	2247	TRIL	TAG	TAGG	6.7001	0	0	6.7001	0.00135767	0	0	0.0029818	0
ENST00000367993.7	chr1	1331	1	2042	1359	442	196	NDUFS2	TGA	TGAG	15.1869	12.9535	0	2.23337	0.00743726	0.00953166	0	0.0113947	1.19546
ENST00000541970.5	chr6	921	-1	3378	1002	73	2258	PDCD2	TAA	TAAA	39.3072	29.4804	0	9.82681	0.0116362	0.0294216	0	0.004352	0.147919
ENST00000264607.9	chr2	1116	1	6891	975	138	5733	ASB1	TAG	TAGA	77.2745	5.80675	0	71.4677	0.0112138	0.00595564	0	0.012466	2.09314
ENST00000336702.7	chr11	1014	1	4771	2091	353	2282	C2CD2L	TGA	TGAG	2.68004	0	0	2.23337	0.000561735	0	0	0.000978688	0
ENST00000422689.3	chr19	1101	1	2258	1701	37	475	ZNF880	TGA	TGAA	0.446673	0.446673	0	0	0.000197818	0.000262594	0	0	0
ENST00000287380.6	chr8	484	1	3478	3168	57	208	TBC1D31	TAG	TAGA	40.6473	39.3072	1.34002	0	0.011687	0.0124076	0.0235091	0	0
ENST00000367090.3	chr6	869	1	5390	1806	5	3534	TMEM181	TGA	TGAG	305.971	56.2808	0	246.564	0.0567665	0.0311632	0	0.069769	2.23882
ENST00000356083.8	chr9	426	1	7813	5550	408	1810	COL27A1	TGA	TGAC	9.82681	5.36008	0	4.46673	0.00125775	0.00096578	0	0.00246781	2.55525
ENST00000397345.7	chr2	682	-1	26202	25545	197	415	NEB	TAG	TAGG	24.567	24.567	0	0	0.000937601	0.000961716	0	0	0
ENST00000534064.6	chr11	802	-1	3146	2859	19	223	INTS4	TAA	TAAG	11.1668	10.2735	0	0.446673	0.00354953	0.00359338	0	0.00200302	0.557419
ENST00000298894.5	chr14	445	-1	2407	1023	357	982	MOAP1	TGA	TGAG	13.8469	10.7202	0.893346	1.78669	0.00575275	0.0104791	0.00250237	0.00181944	0.173625
ENST00000591134.5	chr19	670	1	547	108	224	170	HKR1	TGA	TGAA	2.23337	0.446673	1.34002	0	0.00408294	0.00413586	0.00598223	0	0
ENST00000259199.8	chr2	575	1	1812	1155	172	440	CBWD2	TAA	TAAC	5.36008	4.02006	0.446673	0	0.0029581	0.00348057	0.00259694	0	0
ENST00000400809.8	chr1	29	-1	3112	1530	23	1514	CCNL2	TGA	TGAG	4.91341	3.57339	0	0.893346	0.00157886	0.00233555	0	0.000590057	0.252642
ENST00000299459.2	chr11	151	-1	1110	894	93	78	OR2D2	TGA	TGAA	0.446673	0	0.446673	0	0.000402408	0	0.00480294	0	0
ENST00000513702.5	chr4	168	1	1092	711	146	190	TMEM33	TAG	TAGT	44.6673	31.7138	4.46673	5.36008	0.0409041	0.0446045	0.0305941	0.0282109	0.632468
ENST00000367510.8	chr1	1493	1	3407	978	88	2296	RNF2	TGA	TGAG	47.3474	37.0739	0.446673	8.04012	0.0138971	0.0379079	0.00507583	0.00350179	0.0923765
ENST00000587394.6	chr19	70	-1	937	801	18	73	PLEKHJ1	TAG	TAGC	4.02006	3.57339	0	0	0.00429035	0.00446116	0	0	0
ENST00000261292.9	chr18	150	1	10418	1470	246	8657	LIPG	TGA	TGAG	104.522	9.38014	0	95.1414	0.0100328	0.00638105	0	0.0109901	1.72231
ENST00000394169.5	chr17	475	-1	2230	429	1489	267	ORMDL3	TGA	TGAG	0.893346	0.893346	0	0	0.000400604	0.00208239	0	0	0
ENST00000541050.5	chr12	739	-1	2487	1392	220	830	CORO1C	TGA	TGAA	62.5343	35.2872	0	23.6737	0.0251445	0.02535	0	0.0285225	1.12515
ENST00000374202.6	chrX	335	-1	1534	1077	86	326	IL2RG	TGA	TGAA	0.446673	0	0	0.446673	0.000291182	0	0	0.00137016	0
ENST00000367004.3	chr1	1652	1	1827	1641	54	87	TRAF5	TAG	TAGT	1.78669	1.78669	0	0	0.000977938	0.00108878	0	0	0
ENST00000286523.9	chr14	347	-1	8091	3105	777	4164	ELMSAN1	TAA	TAAG	55.8342	4.02006	0	51.8141	0.00690077	0.00129471	0	0.0124433	9.61095
ENST00000008527.10	chr12	727	-1	2987	1728	582	632	CRY1	TAG	TAGA	21.887	19.6536	1.78669	0.446673	0.00732742	0.0113736	0.00306992	0.000706761	0.0621404
ENST00000303545.3	chr8	495	1	2637	1962	366	264	RNF139	TGA	TGAT	17.4203	16.5269	0	0.893346	0.00660609	0.0084235	0	0.00338389	0.40172
ENST00000501597.3	chr12	477	1	469	45	77	302	RPL41	TAA	TAAA	196.536	53.6008	42.434	38.4139	0.419054	1.19113	0.55109	0.127198	0.106788
ENST00000568985.5	chr16	241	1	714	621	18	30	COQ7	TAA	TAAA	4.91341	4.91341	0	0	0.00688152	0.00791209	0	0	0
ENST00000315930.11	chrX	642	-1	19575	705	708	18117	FGF13	TAG	TAGC	0.446673	0.446673	0	0	2.28186e-05	0.000633579	0	0	0
ENST00000369583.4	chr10	554	1	2477	1122	209	1101	DUSP5	TAA	TAAA	8.04012	4.02006	0	4.02006	0.00324591	0.00358294	0	0.00365128	1.01907
ENST00000373115.5	chr10	286	1	6934	1407	401	5081	CHST3	TAG	TAGG	33.5005	0	0.446673	33.0538	0.00483134	0	0.0011139	0.00650538	0
ENST00000336615.9	chr11	35	1	2416	1482	184	705	PNPLA2	TGA	TGAG	1.34002	1.34002	0	0	0.000554644	0.000904197	0	0	0
ENST00000215882.10	chr22	22	-1	1548	903	57	543	SLC25A1	TAA	TAAG	40.2006	23.227	0	15.1869	0.0259694	0.025722	0	0.0279685	1.08734
ENST00000304788.4	chr20	154	-1	3803	714	60	2984	NANP	TAA	TAAA	25.907	7.14677	0.446673	18.3136	0.00681227	0.0100095	0.00744455	0.00613727	0.613145
ENST00000378618.6	chr11	348	1	1166	948	46	127	C11orf49	TGA	TGAG	2.68004	1.78669	0	0	0.00229849	0.0018847	0	0	0
ENST00000218516.3	chrX	425	-1	1318	1257	16	0	GLA	TAA	TAAA	3.57339	3.12671	0	0	0.00271122	0.00248744	0	0	0
ENST00000288943.5	chr2	455	-1	1685	912	80	648	DUSP2	TGA	TGAG	0.446673	0.446673	0	0	0.000265088	0.000489773	0	0	0
ENST00000542172.1	chr11	238	1	331	90	131	65	SPTY2D1OS	TGA	TGAA	0.893346	0.893346	0	0	0.00269893	0.00992607	0	0	0
ENST00000453372.7	chr19	258	-1	12639	1248	210	11136	ZNF562	TAA	TAAA	87.9946	10.2735	0.446673	75.9345	0.00696215	0.00823196	0.00212702	0.00681883	0.828336
ENST00000394752.8	chr3	367	-1	4553	2568	382	1558	SFMBT1	TGA	TGAG	37.0739	24.567	1.34002	10.7202	0.00814274	0.0095666	0.00350791	0.00688072	0.719244
ENST00000380639.10	chr5	213	1	11145	1134	4	9962	PTCD2	TAA	TAAC	30.3738	4.46673	0	25.907	0.00272533	0.00393892	0	0.00260059	0.660229
ENST00000615189.5	chr22	154	1	4207	1179	93	2890	SEC14L2	TAA	TAAC	2.68004	1.34002	0	1.34002	0.000637043	0.00113657	0	0.000463675	0.407958
ENST00000416651.5	chr2	878	1	967	726	23	173	NIF3L1	TGA	TGAG	27.6937	23.6737	0.446673	1.34002	0.0286388	0.0326084	0.0194206	0.00774578	0.23754
ENST00000619747.1	chr8	406	1	2758	921	674	1118	LAPTM4B	TAA	TAAG	325.625	107.648	0	212.616	0.118066	0.116882	0	0.190176	1.62708
ENST00000402377.3	chr19	553	-1	6497	1905	136	4411	ZNF681	TAG	TAGA	14.2935	9.38014	0	4.91341	0.00220002	0.00492396	0	0.0011139	0.22622
ENST00000614300.4	chr1	42	-1	2156	708	835	568	SLC35E2B	TAA	TAAA	3.57339	2.23337	1.34002	0	0.00165741	0.00315447	0.00160481	0	0
ENST00000381638.7	chr17	59	-1	11466	8853	129	2439	ZZEF1	TAG	TAGC	46.9007	23.6737	0	22.7803	0.00409041	0.00267409	0	0.00934003	3.49279
ENST00000360203.10	chr20	457	1	4630	3870	337	378	RTEL1	TGA	TGAG	15.6336	13.4002	0	1.78669	0.00337658	0.00346258	0	0.0047267	1.36508
ENST00000319977.8	chr17	625	1	2725	1911	231	538	C17orf53	TGA	TGAG	3.57339	3.12671	0	0.446673	0.00131133	0.00163617	0	0.000830248	0.507435
ENST00000506438.5	chr5	433	-1	1305	912	128	220	PITX1	TGA	TGAC	1.34002	1.34002	0	0	0.00102684	0.00146932	0	0	0
ENST00000325875.7	chr9	265	1	3420	1845	326	1204	RMI1	TAA	TAAT	19.6536	16.0802	0.893346	2.68004	0.00574667	0.00871558	0.00274033	0.00222595	0.255399
ENST00000601291.5	chr19	1018	-1	1556	1326	174	11	IRF3	TAA	TAAA	3.57339	3.57339	0	0	0.00229652	0.00269486	0	0	0
ENST00000284136.10	chr7	355	-1	6265	2301	38	3881	SEMA3D	TAG	TAGT	24.1204	9.38014	0	14.7402	0.00385002	0.00407655	0	0.00379805	0.931682
ENST00000426126.6	chr12	610	1	5259	1866	643	2705	ZDHHC17	TAG	TAGC	23.6737	13.8469	0	9.38014	0.00450156	0.00742062	0	0.0034677	0.467307
ENST00000431473.4	chr1	524	1	10577	1143	137	9252	RIMKLA	TGA	TGAA	11.1668	2.68004	0	8.48679	0.00105577	0.00234474	0	0.000917293	0.391213
ENST00000395831.7	chr7	204	-1	2380	1494	41	800	POLM	TGA	TGAC	0.893346	0.893346	0	0	0.000375356	0.000597956	0	0	0
ENST00000526054.5	chr8	597	-1	892	633	32	182	VPS28	TGA	TGAG	6.7001	6.25343	0	0.446673	0.00751132	0.00987903	0	0.00245425	0.24843
ENST00000612183.4	chr14	296	1	1790	1236	284	225	FAM71D	TGA	TGAA	0.446673	0.446673	0	0	0.000249538	0.000361386	0	0	0
ENST00000311604.7	chr11	57	1	1699	987	169	498	LSP1	TAG	TAGG	1.34002	0.446673	0	0.893346	0.000788711	0.000452556	0	0.00179387	3.96386
ENST00000263196.12	chr22	19	-1	4438	1620	200	2573	DGCR2	TAG	TAGA	19.6536	0.446673	0	19.2069	0.00442849	0.000275724	0	0.00746481	27.0735
ENST00000378486.8	chr1	56	1	4870	4218	294	313	PLCH2	TGA	TGAC	40.6473	38.4139	0	2.23337	0.00834646	0.00910714	0	0.00713536	0.783491
ENST00000268835.7	chr17	277	1	1958	1077	253	583	PRPSAP2	TGA	TGAG	43.774	34.8405	1.78669	5.80675	0.0223565	0.0323496	0.00706203	0.00996012	0.30789
ENST00000302851.8	chr19	257	-1	4529	1428	191	2865	ZNF561	TAG	TAGC	16.0802	7.14677	0.446673	8.48679	0.0035505	0.00500474	0.0023386	0.00296223	0.591885
ENST00000264963.8	chr2	466	-1	2397	1014	17	1321	LMAN2L	TGA	TGAG	10.2735	1.34002	0	8.93346	0.00428598	0.00132152	0	0.00676265	5.11734
ENST00000552695.6	chr12	734	1	3255	1344	137	1729	FICD	TAA	TAAC	6.25343	2.68004	0	3.57339	0.00192118	0.00199408	0	0.00206674	1.03644
ENST00000457542.7	chr15	107	1	7182	4494	230	2413	MAPKBP1	TGA	TGAG	9.38014	4.02006	1.34002	3.12671	0.00130606	0.000894539	0.00582617	0.00129578	1.44854
ENST00000315580.9	chr12	885	1	1644	1233	139	227	ARL6IP4	TGA	TGAG	24.1204	16.9736	0	6.7001	0.0146717	0.0137661	0	0.0295159	2.1441
ENST00000545668.5	chr12	245	1	3751	2880	74	752	DDX11	TGA	TGAA	30.3738	20.547	0	9.82681	0.00809752	0.00713436	0	0.0130676	1.83164
ENST00000334126.11	chr11	762	-1	7960	7029	221	665	C2CD3	TGA	TGAC	29.0338	24.567	0.446673	3.57339	0.00364746	0.0034951	0.00202115	0.00537351	1.53744
ENST00000258494.14	chr12	715	-1	7428	2739	16	4628	ALDH1L2	TAG	TAGA	9.82681	3.12671	0	6.7001	0.00132294	0.00114155	0	0.00144773	1.26821
ENST00000620676.6	chr1	150	1	16357	13134	161	3017	VPS13D	TGA	TGAA	55.3875	43.774	0.446673	11.1668	0.00338616	0.00333287	0.00277437	0.0037013	1.11054
ENST00000610872.1	chr11	862	1	2191	1539	194	413	KDM4D	TAA	TAAG	0.446673	0.446673	0	0	0.000203867	0.000290236	0	0	0
ENST00000269967.4	chr19	772	1	3329	999	133	2152	CCDC97	TGA	TGAT	12.0602	2.68004	0	9.38014	0.00362276	0.00268272	0	0.0043588	1.62477
ENST00000587091.6	chrX	366	1	4128	1587	139	2357	SLC16A2	TAA	TAAT	7.14677	1.78669	0	5.36008	0.00173129	0.00112583	0	0.00227411	2.01994
ENST00000335670.11	chr15	242	-1	10827	1539	78	9165	RORA	TAA	TAAA	6.25343	2.23337	0	4.02006	0.000577577	0.00145118	0	0.000438632	0.302259
ENST00000361265.8	chr14	69	-1	2569	1584	66	874	AJUBA	TGA	TGAG	15.1869	5.36008	0	9.38014	0.0059116	0.00338389	0	0.0107324	3.17162
ENST00000507866.6	chr4	76	1	6152	3447	103	2557	SORCS2	TGA	TGAT	0.446673	0.446673	0	0	7.26062e-05	0.000129583	0	0	0
ENST00000544040.6	chr12	55	-1	6582	5706	249	582	CHD4	TGA	TGAA	141.149	113.455	0.446673	23.227	0.0214447	0.0198835	0.00179387	0.0399089	2.00714
ENST00000371120.7	chr1	697	1	2890	1344	153	1348	ATG4C	TAA	TAAA	14.2935	12.5069	0	1.78669	0.00494586	0.00930569	0	0.00132544	0.142433
ENST00000329146.8	chr14	549	1	1857	594	707	511	CRIP2	TAG	TAGG	35.7339	16.5269	1.78669	15.6336	0.0192428	0.0278231	0.00252715	0.0305941	1.09959
ENST00000355377.7	chr16	243	1	3088	1392	401	1250	SYT17	TGA	TGAG	7.59345	7.14677	0.446673	0	0.00245902	0.00513418	0.0011139	0	0
ENST00000382125.8	chr2	9	-1	1766	1131	187	403	EIPR1	TGA	TGAC	17.4203	12.0602	0.893346	4.02006	0.00986424	0.0106633	0.00477725	0.00997533	0.935484
ENST00000321117.9	chr2	90	-1	4279	2706	231	1297	DNMT3A	TAA	TAAG	28.5871	9.38014	0.893346	17.8669	0.00668079	0.00346642	0.0038673	0.0137756	3.97401
ENST00000217901.10	chrX	723	-1	1335	1149	43	98	IDH3G	TAG	TAGG	4.91341	4.91341	0	0	0.00368045	0.00427625	0	0	0
ENST00000263390.7	chr19	435	-1	3174	1770	257	1102	MED26	TGA	TGAC	2.68004	0	0	2.68004	0.000844373	0	0	0.00243198	0
ENST00000297313.8	chr8	254	1	2117	1134	99	839	RGS20	TAG	TAGG	2.68004	0.893346	0	1.78669	0.00126596	0.000787783	0	0.00212955	2.70322
ENST00000375980.9	chr1	182	1	2422	690	78	1609	EFHD2	TAG	TAGC	38.4139	7.59345	0	30.8205	0.0158604	0.011005	0	0.019155	1.74058
ENST00000278422.9	chr11	426	1	1645	858	20	722	TMX2	TAA	TAAG	125.515	41.9873	1.78669	76.3811	0.076301	0.0489362	0.0893346	0.105791	2.16181
ENST00000599218.6	chrX	219	-1	2795	1815	70	865	PRICKLE3	TGA	TGAA	0.446673	0.446673	0	0	0.000159812	0.000246101	0	0	0
ENST00000589703.5	chr19	838	-1	2409	2016	96	252	ZNF45	TAA	TAAA	15.1869	12.0602	0	3.12671	0.00630423	0.00598223	0	0.0124076	2.07407
ENST00000418543.8	chr19	336	1	1450	915	336	154	WDR83	TGA	TGAA	0.446673	0.446673	0	0	0.000308051	0.000488167	0	0	0
ENST00000626352.2	chr22	64	1	2625	1551	72	957	PPIL2	TAG	TAGA	14.7402	7.59345	0.893346	5.80675	0.00561532	0.00489584	0.0124076	0.00606766	1.23935
ENST00000219091.8	chr16	129	1	1947	1632	118	152	ZNF205	TAG	TAGG	1.34002	0.893346	0.446673	0	0.000688248	0.000547394	0.00378537	0	0
ENST00000375661.6	chr6	245	-1	858	255	203	355	LSM2	TGA	TGAT	13.8469	5.80675	0.446673	7.59345	0.0161385	0.0227716	0.00220036	0.02139	0.939328
ENST00000406341.5	chr3	21	1	6582	4296	184	2057	SETD5	TAG	TAGG	208.15	106.308	1.78669	98.2681	0.0316241	0.0247459	0.00971029	0.0477725	1.93053
ENST00000216264.13	chr22	349	-1	4442	1581	98	2718	CERK	TGA	TGAG	150.082	51.3674	0	98.2681	0.0337871	0.0324905	0	0.0361546	1.11277
ENST00000355904.9	chr8	167	-1	1747	843	262	597	GTF2E2	TAG	TAGG	37.5206	21.887	1.78669	11.6135	0.0214771	0.0259632	0.00681944	0.0194531	0.749256
ENST00000522706.5	chr8	3	-1	1551	1005	30	471	ERICH1	TAA	TAAC	1.34002	1.34002	0	0	0.000863971	0.00133335	0	0	0
ENST00000648322.1	chr11	296	1	2289	1551	74	619	CAT	TGA	TGAG	25.4604	20.547	0	4.46673	0.0111229	0.0132476	0	0.00721605	0.544707
ENST00000333640.11	chr12	357	-1	2960	1803	71	1041	AC139768.1	TAG	TAGG	0.446673	0.446673	0	0	0.000150903	0.000247739	0	0	0
ENST00000221573.11	chr19	222	1	1520	972	23	480	SNAPC2	TGA	TGAG	1.34002	0.893346	0	0.446673	0.000881592	0.000919081	0	0.000930569	1.0125
ENST00000216034.6	chr22	251	1	2031	396	16	1574	TOMM22	TAG	TAGA	147.402	39.7539	2.23337	102.288	0.0725762	0.100389	0.139585	0.0649861	0.647345
ENST00000367569.3	chr6	813	-1	693	228	70	350	SF3B5	TGA	TGAG	42.8806	19.2069	10.2735	8.93346	0.0618768	0.084241	0.146764	0.0255242	0.30299
ENST00000330125.10	chr22	174	-1	3647	2925	170	507	EIF4ENIF1	TGA	TGAG	5.36008	4.91341	0	0.446673	0.00146972	0.0016798	0	0.000881012	0.524476
ENST00000449105.8	chr2	192	-1	4144	1596	296	2207	HNRNPLL	TAA	TAAG	29.4804	23.6737	0	5.80675	0.007114	0.0148331	0	0.00263106	0.177377
ENST00000434436.8	chr19	55	-1	5678	843	228	4562	MBD3	TAG	TAGG	54.4941	8.93346	0	45.5607	0.00959742	0.0105972	0	0.00998699	0.942416
ENST00000409785.9	chr2	402	1	7500	1113	285	6057	KCMF1	TGA	TGAT	107.202	75.4878	0.446673	29.4804	0.0142935	0.0678237	0.00156727	0.00486717	0.071762
ENST00000622669.4	chr3	791	1	2361	1512	74	730	MFSD1	TGA	TGAG	66.1076	31.2671	0	34.8405	0.0279998	0.0206793	0	0.0477267	2.30795
ENST00000595091.6	chr19	1119	1	4413	2880	213	1275	ZNF845	TAG	TAGA	21.887	12.5069	0.893346	8.48679	0.00495966	0.00434266	0.00419411	0.00665631	1.53277
ENST00000367874.5	chr1	1372	-1	2096	975	25	1051	TADA1	TAA	TAAA	15.1869	9.38014	0	5.80675	0.00724565	0.00962065	0	0.00552498	0.574283
ENST00000355624.8	chr10	595	-1	6399	1506	772	4076	RAB11FIP2	TAA	TAAT	47.3474	24.1204	3.57339	19.2069	0.00739918	0.0160162	0.00462874	0.00471221	0.294215
ENST00000622845.5	chr6	845	-1	1340	807	143	345	RMND1	TGA	TGAT	12.5069	9.38014	0	3.12671	0.00933347	0.0116235	0	0.00906294	0.77971
ENST00000261884.7	chr15	263	1	2045	1713	54	233	TRIP4	TGA	TGAC	5.80675	5.80675	0	0	0.00283949	0.00338981	0	0	0
ENST00000373695.1	chrX	344	1	3213	2043	531	594	GCNA	TGA	TGAC	0.893346	0.446673	0	0.446673	0.000278041	0.000218636	0	0.000751975	3.43939
ENST00000361720.10	chr1	342	-1	2125	1545	19	516	GPATCH3	TGA	TGAC	2.68004	1.78669	0	0.893346	0.0012612	0.00115644	0	0.00173129	1.49709
ENST00000231887.8	chr3	889	-1	3801	2139	21	1596	EHHADH	TGA	TGAT	4.46673	3.57339	0	0.893346	0.00117515	0.00167059	0	0.000559741	0.335056
ENST00000447017.7	chr4	79	-1	3725	1905	118	1657	ABLIM2	TGA	TGAC	0.893346	0.446673	0	0	0.000239825	0.000234474	0	0	0
ENST00000290795.7	chr1	586	-1	3599	1392	1216	946	GPBP1L1	TAG	TAGG	152.762	109.882	27.6937	14.2935	0.0424457	0.0789379	0.0227745	0.0151095	0.191409
ENST00000315091.7	chr1	126	1	1835	855	6	929	TARDBP	TAA	TAAA	70.1277	19.6536	0	48.6874	0.0382167	0.0229867	0	0.0524084	2.27994
ENST00000415083.7	chr18	82	-1	3402	1224	38	2095	SS18	TGA	TGAA	94.6947	49.5807	1.34002	42.8806	0.027835	0.0405071	0.0352637	0.0204681	0.505296
ENST00000372480.1	chr9	550	1	852	639	146	22	NTMT1	TGA	TGAG	4.91341	4.02006	0	0.446673	0.00576691	0.00629117	0	0.0203033	3.22727
ENST00000396153.7	chr1	621	-1	6821	1920	450	4406	FAF1	TAA	TAAA	47.3474	40.6473	0.446673	5.80675	0.00694141	0.0211705	0.000992607	0.00131792	0.0622528
ENST00000204679.9	chr16	52	1	1975	885	29	1016	GNPTG	TGA	TGAC	14.2935	12.0602	0	1.78669	0.00723724	0.0136273	0	0.00175856	0.129046
ENST00000431388.3	chr17	1008	1	565	192	40	288	NDUFAF8	TAG	TAGG	29.0338	7.14677	0	17.4203	0.0513872	0.0372228	0	0.060487	1.625
ENST00000313708.11	chr5	631	-1	5405	1743	432	3185	EBF1	TGA	TGAA	14.2935	5.36008	0	8.93346	0.0026445	0.0030752	0	0.00280486	0.912088
ENST00000216237.10	chr22	281	1	3189	2085	45	1014	L3MBTL2	TGA	TGAG	4.91341	2.23337	0	2.68004	0.00154074	0.00107116	0	0.00264304	2.46746
ENST00000252622.15	chr19	77	-1	491	279	14	153	LSM7	TAG	TAGC	32.6071	20.547	2.23337	1.78669	0.0664097	0.0736451	0.159526	0.0116777	0.158568
ENST00000625837.2	chrX	151	1	3237	2169	899	124	DDX3X	TGA	TGAG	32.6071	31.7138	0.893346	0	0.0100733	0.0146214	0.000993711	0	0
ENST00000509430.5	chr5	226	-1	3047	2307	304	391	GFM2	TAA	TAAA	25.4604	22.3337	0	2.23337	0.00835588	0.00968082	0	0.00571193	0.590026
ENST00000361673.4	chr18	180	-1	7437	6480	342	570	ALPK2	TAA	TAAC	0.893346	0.446673	0	0.446673	0.000120122	6.89311e-05	0	0.000783637	11.3684
ENST00000358867.10	chr11	817	1	989	660	17	267	TMEM126B	TAA	TAAC	48.2407	40.6473	0	0.446673	0.0487773	0.0615868	0	0.00167293	0.0271638
ENST00000337137.9	chr22	350	1	3758	1521	131	2061	TBC1D22A	TGA	TGAG	6.25343	4.02006	0	2.23337	0.00166403	0.00264304	0	0.00108363	0.409995
ENST00000407540.8	chr2	63	-1	2557	1428	31	1053	MATN3	TAA	TAAA	3.12671	2.68004	0	0.446673	0.00122281	0.00187678	0	0.000424191	0.226021
ENST00000263593.7	chr11	1070	-1	5583	1539	167	3832	SIAE	TGA	TGAC	4.91341	0.893346	0	4.02006	0.000880066	0.000580472	0	0.00104908	1.80728
ENST00000245544.9	chr17	919	1	2133	1938	77	73	NUP85	TGA	TGAG	9.38014	8.93346	0.446673	0	0.00439763	0.00460963	0.00580095	0	0
ENST00000323786.10	chr16	619	-1	2820	2337	5	433	COG4	TAG	TAGC	15.6336	10.2735	0	5.36008	0.00554382	0.00439601	0	0.0123789	2.81595
ENST00000342192.8	chr22	60	1	3028	432	192	2359	UBE2L3	TAA	TAAA	74.5944	44.2207	3.12671	23.227	0.0246349	0.102363	0.016285	0.00984612	0.0961887
ENST00000361518.10	chr10	680	1	1084	726	24	289	ZNF511	TGA	TGAT	18.3136	11.1668	0	6.25343	0.0168945	0.0153813	0	0.0216382	1.40678
ENST00000331134.11	chr17	1014	-1	4381	1794	176	2366	NPLOC4	TAG	TAGG	27.2471	8.04012	0	17.8669	0.00621937	0.00448167	0	0.00755153	1.68498
ENST00000283254.12	chr2	726	-1	9102	5970	469	2618	SCN3A	TAA	TAAA	0.446673	0.446673	0	0	4.90742e-05	7.48196e-05	0	0	0
ENST00000333213.11	chr17	927	1	1937	1548	27	317	TSEN54	TGA	TGAC	4.91341	4.02006	0	0.893346	0.00253661	0.00259694	0	0.00281813	1.08517
ENST00000269122.7	chr17	796	1	7760	4995	268	2452	CLTC	TGA	TGAG	301.504	159.909	0.446673	134.002	0.0388537	0.0320138	0.00166669	0.0546501	1.70708
ENST00000307961.11	chr15	292	-1	2741	1251	59	1386	RPL4	TAA	TAAA	2223.99	2060.5	129.089	8.48679	0.811378	1.64709	2.18794	0.00612323	0.00371761
ENST00000318833.4	chr17	93	1	4987	1476	111	3355	ZFP3	TAA	TAAT	0.446673	0.446673	0	0	8.95675e-05	0.000302624	0	0	0
ENST00000545891.5	chr12	902	-1	1790	912	217	616	CCDC92	TGA	TGAA	4.02006	3.12671	0	0.893346	0.00224584	0.00342841	0	0.00145024	0.423006
ENST00000276055.3	chrX	167	1	2289	1428	142	674	CHST7	TAG	TAGC	0.893346	0	0	0.893346	0.000390278	0	0	0.00132544	0
ENST00000223210.5	chr7	767	1	6942	3477	231	3189	ZNF862	TGA	TGAG	4.46673	2.68004	0	1.78669	0.000643436	0.000770791	0	0.000560267	0.726874
ENST00000371281.4	chr1	666	1	2356	1131	42	1138	TTC4	TGA	TGAC	19.2069	9.38014	0.893346	8.48679	0.00815236	0.00829367	0.0212702	0.00745764	0.899197
ENST00000395686.8	chr14	216	-1	5139	1374	71	3649	ERO1A	TAA	TAAA	129.535	60.3009	0.893346	66.5543	0.0252063	0.0438871	0.0125823	0.0182391	0.41559
ENST00000377604.8	chrX	173	1	3397	2760	384	208	RBM10	TGA	TGAG	10.7202	5.80675	1.34002	2.68004	0.00315577	0.0021039	0.00348963	0.0128848	6.12426
ENST00000342665.4	chr20	7	1	4630	915	324	3346	SOX12	TGA	TGAG	3.12671	0	0	3.12671	0.000675316	0	0	0.000934463	0
ENST00000371933.8	chr1	604	-1	5817	1455	1021	3296	EFCAB14	TAG	TAGC	107.202	42.434	15.1869	49.5807	0.018429	0.0291642	0.0148745	0.0150427	0.515793
ENST00000339728.6	chr2	1094	-1	3866	573	489	2759	ARL4C	TGA	TGAT	16.5269	4.46673	0.446673	11.6135	0.00427494	0.00779534	0.000913442	0.00420932	0.539978
ENST00000343380.6	chr20	193	-1	2690	1281	115	1249	E2F1	TGA	TGAC	41.5406	24.567	0	16.9736	0.0154426	0.019178	0	0.0135897	0.708611
ENST00000396444.7	chr15	186	1	19026	3324	332	15325	USP8	TAA	TAAG	127.302	87.9946	3.57339	33.0538	0.00669094	0.0264725	0.0107632	0.00215686	0.0814753
ENST00000375749.8	chr20	175	1	5226	1134	56	3991	POFUT1	TGA	TGAT	256.837	19.2069	0	236.737	0.049146	0.0169373	0	0.0593177	3.50218
ENST00000338359.4	chr12	904	1	652	375	140	92	RFLNA	TGA	TGAC	0.446673	0	0	0.446673	0.000685082	0	0	0.00485514	0
ENST00000375985.4	chr20	165	1	2787	1758	98	886	MYLK2	TGA	TGAG	1.34002	1.34002	0	0	0.000480811	0.000762241	0	0	0
ENST00000370867.8	chr1	739	1	3437	747	87	2558	TYW3	TAA	TAAG	134.449	27.6937	3.57339	100.501	0.039118	0.0370733	0.0410734	0.0392891	1.05977
ENST00000316999.9	chr6	537	1	2403	1290	242	826	SMAP1	TGA	TGAA	19.6536	17.8669	0	1.78669	0.00817879	0.0138503	0	0.00216307	0.156174
ENST00000375754.9	chr9	289	1	4973	1875	110	2943	SYK	TAA	TAAC	16.9736	5.80675	0.893346	9.82681	0.00341315	0.00309693	0.00812133	0.00333905	1.07818
ENST00000325468.9	chr11	334	1	2522	2133	99	245	LARGE2	TGA	TGAG	6.7001	6.25343	0	0.446673	0.00265666	0.00293175	0	0.00182316	0.621866
ENST00000521613.5	chr19	950	-1	1903	1431	289	138	CARD8	TAA	TAAA	12.9535	8.04012	3.12671	0.446673	0.0068069	0.00561853	0.0108191	0.00323676	0.576087
ENST00000524851.5	chr11	778	1	866	699	-1	123	RPS3	TAA	TAAC	736.118	696.81	736.118	0	0.85002	0.996867	-736.118	0	0
ENST00000336440.3	chr14	310	-1	3026	984	1792	205	ZFP36L1	TAA	TAAG	29.0338	15.6336	5.80675	7.14677	0.00959477	0.0158878	0.00324038	0.0348623	2.19429
ENST00000361464.8	chr10	501	-1	5174	2718	416	1995	OGA	TGA	TGAC	139.362	66.5543	0.446673	70.5744	0.0269351	0.0244865	0.00107373	0.0353756	1.4447
ENST00000376741.5	chr17	683	1	3026	1809	45	1127	SP2	TAA	TAAG	1.78669	1.34002	0.446673	0	0.000590447	0.000740752	0.00992607	0	0
ENST00000379487.5	chr13	105	1	2388	1098	159	1086	WBP4	TAG	TAGT	5.36008	4.91341	0	0	0.00224459	0.00447487	0	0	0
ENST00000222247.10	chr19	470	1	634	498	41	50	RPL18A	TAG	TAGG	250.584	222.89	25.0137	0	0.395242	0.44757	0.61009	0	0
ENST00000393952.3	chr11	669	1	1550	1224	183	98	LRFN4	TAA	TAAG	5.36008	5.36008	0	0	0.00345812	0.00437915	0	0	0
ENST00000358933.10	chr16	579	1	4767	4173	204	345	EDC4	TAG	TAGC	11.1668	8.04012	0	3.12671	0.00234253	0.0019267	0	0.00906294	4.70386
ENST00000297477.10	chr7	17	-1	6051	1209	86	4711	TMEM184A	TAG	TAGG	3.57339	0	0	3.57339	0.000590545	0	0	0.00075852	0
ENST00000261023.8	chr2	821	1	7039	3114	277	3603	ITGAV	TAA	TAAC	473.92	127.749	0	344.385	0.0673278	0.0410239	0	0.0955829	2.32993
ENST00000373237.4	chr1	450	-1	4426	573	88	3720	PSMB2	TAA	TAAC	89.3346	40.6473	2.68004	45.5607	0.0201841	0.0709376	0.030455	0.0122475	0.172652
ENST00000502213.6	chr4	145	-1	2779	2328	224	182	TLR1	TAG	TAGA	0.446673	0.446673	0	0	0.000160732	0.00019187	0	0	0
ENST00000324324.12	chr15	170	-1	10137	1770	52	8270	MYEF2	TAA	TAAT	20.1003	3.12671	0	16.9736	0.00198286	0.0017665	0	0.00205243	1.16186
ENST00000334414.10	chr12	588	-1	12316	6615	39	5617	PTPRB	TGA	TGAG	4.02006	2.68004	0	1.34002	0.000326409	0.000405146	0	0.000238565	0.588837
ENST00000323570.8	chr4	533	1	4399	849	116	3389	ELMOD2	TAA	TAAA	30.3738	6.25343	0.446673	23.6737	0.0069047	0.00736564	0.00385063	0.00698545	0.948383
ENST00000285407.11	chr8	433	-1	2915	1410	118	1342	KLF10	TGA	TGAC	31.7138	16.5269	1.34002	13.4002	0.0108795	0.0117212	0.0113561	0.00998524	0.851895
ENST00000312431.10	chr6	519	-1	17756	16581	120	1010	DST	TAG	TAGT	1017.52	950.521	0.446673	65.2143	0.0573058	0.0573259	0.00372228	0.0645686	1.12634
ENST00000315286.13	chr17	639	-1	2114	642	17	1410	CCDC43	TAA	TAAC	71.021	27.6937	0	39.3072	0.0335956	0.0431367	0	0.0278775	0.646259
ENST00000264071.7	chr19	183	-1	2277	1302	91	839	TUBB4A	TAG	TAGG	0.446673	0.446673	0	0	0.000196167	0.000343067	0	0	0
ENST00000367600.5	chr1	1461	1	2519	1782	5	687	QSOX1	TGA	TGAA	13.4002	2.68004	0	10.7202	0.00531965	0.00150395	0	0.0156043	10.3755
ENST00000369966.8	chr10	511	1	3195	2670	338	142	NFKB2	TGA	TGAC	8.93346	8.93346	0	0	0.00279608	0.00334587	0	0	0
ENST00000380338.9	chr9	65	-1	6724	1674	237	4768	MLLT3	TGA	TGAG	5.80675	2.23337	0	3.57339	0.000863586	0.00133415	0	0.000749452	0.561745
ENST00000652032.1	chr3	801	-1	1640	963	563	69	B3GALNT1	TAA	TAAC	7.59345	3.57339	1.34002	1.78669	0.00463015	0.00371068	0.00238014	0.0258941	6.97826
ENST00000561553.5	chr16	274	1	1415	1206	47	117	UQCRC2	TGA	TGAA	134.449	119.708	6.25343	0.446673	0.0950167	0.0992607	0.133052	0.00381772	0.0384615
ENST00000444766.7	chr17	813	-1	5878	3582	70	2181	INTS2	TAA	TAAA	17.4203	7.14677	0	10.2735	0.00296364	0.00199519	0	0.00471045	2.3609
ENST00000344762.6	chr11	1080	1	3812	2823	172	772	CCDC15	TAA	TAAT	3.12671	2.68004	0	0.446673	0.000820229	0.000949359	0	0.000578592	0.609456
ENST00000377507.7	chr1	100	-1	1923	735	161	982	TNFRSF9	TGA	TGAA	1.78669	0.446673	0	1.34002	0.000929118	0.000607719	0	0.00136458	2.24542
ENST00000539517.7	chr14	129	-1	6990	1491	591	4863	NOVA1	TGA	TGAG	0.446673	0	0	0.446673	6.39018e-05	0	0	9.18514e-05	0
ENST00000236192.12	chr1	1416	-1	4977	393	199	4340	VAMP4	TGA	TGAT	29.4804	8.93346	2.23337	17.8669	0.00592333	0.0227315	0.0112229	0.0041168	0.181106
ENST00000405808.5	chr2	242	-1	299	141	5	108	FBXO11	TAA	TAAA	5.36008	4.46673	0	0	0.0179267	0.031679	0	0	0
ENST00000375440.9	chr13	282	1	5821	2247	9	3520	CUL4A	TGA	TGAC	104.075	60.3009	0	42.8806	0.0178792	0.0268362	0	0.012182	0.453939
ENST00000373443.7	chr1	429	1	2048	1350	312	341	AZIN2	TGA	TGAG	0.893346	0.893346	0	0	0.000436204	0.000661738	0	0	0
ENST00000417606.2	chr19	829	1	2381	2115	9	212	SRRM5	TAG	TAGC	0.446673	0.446673	0	0	0.000187599	0.000211193	0	0	0
ENST00000428559.7	chr12	188	1	1644	924	46	629	DERA	TAA	TAAA	41.9873	30.8205	0	9.82681	0.0255397	0.0333555	0	0.0156229	0.468376
ENST00000541412.5	chr6	47	1	1177	306	379	447	TMEM14C	TAG	TAGC	59.4075	13.4002	12.9535	30.3738	0.0504737	0.0437915	0.0341782	0.0679503	1.55168
ENST00000379341.9	chrX	101	1	956	783	72	56	PRDX4	TGA	TGAG	12.0602	11.6135	0.446673	0	0.0126152	0.0148321	0.0062038	0	0
ENST00000543693.5	chr9	44	-1	7622	897	332	6348	NFIB	TGA	TGAG	3.57339	0.446673	0	3.12671	0.000468825	0.000497963	0	0.000492551	0.98913
ENST00000334186.9	chr19	996	1	4583	3552	188	798	PPFIA3	TAG	TAGT	1.78669	0.893346	0	0.893346	0.000389852	0.000251505	0	0.00111948	4.45113
ENST00000334715.7	chr7	438	1	4079	1602	51	2381	ZSCAN25	TGA	TGAG	17.4203	5.36008	0	12.0602	0.00427072	0.00334587	0	0.00506517	1.51386
ENST00000294016.8	chr16	150	-1	7980	4029	790	3116	ADCY9	TGA	TGAG	22.7803	12.9535	0	9.82681	0.00285468	0.00321507	0	0.00315366	0.980899
ENST00000650822.1	chr7	691	1	2367	1572	532	218	TBXAS1	TGA	TGAC	5.36008	0.446673	4.91341	0	0.0022645	0.000284143	0.00923572	0	0
ENST00000361439.9	chr16	307	-1	1042	768	72	157	NSMCE1	TAG	TAGC	18.3136	15.6336	0	1.78669	0.0175754	0.0203562	0	0.0113802	0.559054
ENST00000287322.5	chr8	195	1	4197	1341	9	2802	BAG4	TGA	TGAA	68.341	22.3337	0.446673	45.5607	0.0162833	0.0166545	0.0496304	0.0162601	0.976317
ENST00000253024.10	chr19	1279	1	3364	2475	688	156	TRIM28	TGA	TGAG	29.4804	26.8004	0	2.23337	0.00876351	0.0108284	0	0.0143165	1.32212
ENST00000505803.5	chr5	333	-1	803	585	175	-2	STARD4	TGA	TGAG	35.7339	25.0137	8.93346	0	0.0445004	0.0427585	0.0510484	0	0
ENST00000358415.9	chr10	35	1	3146	2808	113	180	ITIH2	TAA	TAAA	0.893346	0.893346	0	0	0.000283963	0.000318143	0	0	0
ENST00000359393.6	chr11	590	-1	3618	1572	405	1596	EHD1	TGA	TGAT	26.3537	8.93346	0	16.9736	0.00728406	0.00568287	0	0.0106351	1.87143
ENST00000381031.8	chr22	345	1	2566	1377	26	1118	TTC38	TGA	TGAG	4.02006	2.23337	0	1.34002	0.00156666	0.00162191	0	0.00119859	0.738998
ENST00000424358.1	chr20	213	-1	867	183	81	558	MMP24OS	TGA	TGAC	6.25343	0	0	6.25343	0.00721272	0	0	0.0112069	0
ENST00000644386.1	chr20	367	-1	1198	303	81	769	ADNP	TAA	TAAA	45.5607	7.14677	0.446673	36.6272	0.0380306	0.0235867	0.00551448	0.0476297	2.01934
ENST00000565874.5	chr16	492	1	1976	1614	186	131	CPNE2	TGA	TGAG	12.0602	10.2735	0	0.893346	0.00610333	0.00636523	0	0.00681944	1.07136
ENST00000342679.8	chr17	300	1	2303	1011	243	1004	MAP2K3	TAG	TAGG	16.9736	5.36008	0	11.6135	0.00737021	0.00530176	0	0.0115672	2.18177
ENST00000407461.5	chr22	289	-1	802	582	110	65	POLR3H	TAG	TAGC	8.04012	5.36008	0	2.68004	0.0100251	0.00920976	0	0.0412314	4.47692
ENST00000335870.6	chr7	761	1	2810	1455	122	1188	ZNF212	TAA	TAAG	5.80675	3.57339	0	2.23337	0.00206646	0.00245594	0	0.00187994	0.765467
ENST00000204961.5	chrX	315	1	3303	1008	750	1500	EFNB1	TGA	TGAG	3.57339	0	0	3.57339	0.00108186	0	0	0.00238226	0
ENST00000344417.10	chr7	56	1	2178	1317	257	559	C7orf26	TAG	TAGG	4.02006	3.12671	0	0.893346	0.00184576	0.00237412	0	0.00159812	0.673141
ENST00000235532.9	chr1	466	-1	1455	1107	76	227	OSCP1	TAG	TAGC	0.893346	0.893346	0	0	0.000613984	0.000806998	0	0	0
ENST00000267163.5	chr13	145	1	4793	2754	181	1813	RB1	TGA	TGAG	33.0538	20.9936	0	11.6135	0.00689627	0.00762296	0	0.00640568	0.840314
ENST00000312493.5	chr15	388	-1	11512	5208	273	5986	PEAK1	TAA	TAAT	154.102	36.1805	2.23337	115.688	0.0133862	0.00694711	0.00818083	0.0193265	2.78195
ENST00000262241.7	chr14	509	1	5751	1425	232	4049	RCOR1	TGA	TGAG	113.008	8.48679	0	104.522	0.0196502	0.00595564	0	0.0258142	4.3344
ENST00000369250.7	chr10	579	1	2870	2184	329	312	FAM160B1	TAA	TAAG	7.14677	7.14677	0	0	0.00249016	0.00327233	0	0	0
ENST00000372853.8	chr9	528	1	2650	273	56	2276	URM1	TGA	TGAG	46.9007	9.82681	0.446673	33.0538	0.0176984	0.0359956	0.00797631	0.0145228	0.403459
ENST00000393829.6	chr17	576	1	3028	2463	161	359	ATP6V0A1	TGA	TGAG	7.59345	5.36008	0	2.23337	0.00250774	0.00217624	0	0.00622108	2.85864
ENST00000370950.7	chr1	729	1	3784	1422	76	2241	SRSF11	TGA	TGAA	83.0812	71.9144	0	10.2735	0.0219559	0.0505727	0	0.00458433	0.0906483
ENST00000237449.10	chr2	399	1	12666	12444	2	175	DNAH6	TGA	TGAA	0.446673	0.446673	0	0	3.52655e-05	3.58947e-05	0	0	0
ENST00000651699.1	chr5	474	-1	1915	1107	146	617	TMEM173	TGA	TGAG	4.91341	2.68004	0.446673	1.78669	0.00256575	0.00242099	0.00305941	0.00289577	1.19611
ENST00000529308.6	chr11	806	1	4725	3024	243	1413	USP35	TAA	TAAT	1.78669	0.893346	0	0.893346	0.000378136	0.000295419	0	0.000632234	2.14013
ENST00000302550.16	chr1	1822	1	4017	552	182	3238	DESI2	TAA	TAAA	191.623	20.1003	0.893346	167.949	0.047703	0.0364136	0.0049085	0.0518682	1.42442
ENST00000206595.11	chr14	132	1	5770	2088	113	3524	G2E3	TAA	TAAA	50.4741	32.6071	0.893346	16.9736	0.00874767	0.0156164	0.00790572	0.00481657	0.308429
ENST00000272793.9	chr2	749	1	8005	5634	44	2282	UBR3	TGA	TGAC	62.0876	39.7539	0	22.3337	0.0077561	0.00705607	0	0.00978688	1.38702
ENST00000394303.8	chr17	458	-1	3711	1764	168	1734	CACNB1	TGA	TGAG	0.893346	0	0	0.893346	0.000240729	0	0	0.000515194	0
ENST00000545121.5	chr1	912	1	2251	1218	202	786	CEPT1	TAA	TAAT	22.3337	13.4002	0.446673	8.04012	0.00992166	0.0110018	0.00221125	0.0102292	0.929771
ENST00000366582.8	chr1	1798	-1	8459	6402	121	1891	HEATR1	TAA	TAAG	125.962	101.395	2.68004	19.6536	0.0148909	0.015838	0.0221491	0.0103932	0.656222
ENST00000301459.5	chr11	560	-1	2915	1539	702	629	RCOR2	TGA	TGAG	9.82681	6.7001	0	3.12671	0.00337112	0.00435354	0	0.00497093	1.14181
ENST00000339394.7	chr1	388	-1	5246	1296	166	3739	SDC3	TAG	TAGT	166.609	16.9736	0	149.189	0.0317593	0.0130969	0	0.0399007	3.04658
ENST00000452020.5	chr3	99	-1	1162	846	181	90	SGO1	TAA	TAAA	20.547	15.6336	3.12671	0.446673	0.0176824	0.0184794	0.0172747	0.00496304	0.268571
ENST00000615353.1	chr6	136	1	1294	279	715	255	HIST1H4I	TAA	TAAA	6.7001	6.25343	0.446673	0	0.00517782	0.0224137	0.000624718	0	0
ENST00000326019.10	chr2	142	1	2959	2358	276	280	SLC4A1AP	TGA	TGAT	15.1869	15.1869	0	0	0.00513244	0.00644058	0	0	0
ENST00000423014.3	chr1	1318	-1	567	315	69	138	TSTD1	TAG	TAGG	0.446673	0	0	0.446673	0.000787783	0	0	0.00323676	0
ENST00000503585.6	chr4	118	1	6309	714	340	5210	PACRGL	TGA	TGAA	16.0802	5.36008	3.12671	7.14677	0.00254878	0.00750711	0.00919621	0.00137174	0.182726
ENST00000331456.7	chr3	301	-1	2023	1377	105	496	TRAIP	TGA	TGAG	5.80675	4.46673	0	0.893346	0.00287037	0.00324381	0	0.0018011	0.555242
ENST00000426196.6	chrX	204	1	4118	3615	281	177	HDAC6	TAA	TAAG	7.14677	5.36008	0	1.78669	0.0017355	0.00148273	0	0.0100943	6.80791
ENST00000331573.7	chr21	128	-1	2154	834	460	815	PSMG1	TGA	TGAT	12.9535	12.9535	0	0	0.00601371	0.0155318	0	0	0
ENST00000372188.5	chr10	346	1	829	657	124	3	PRXL2A	TGA	TGAT	19.2069	17.4203	0	0	0.0231688	0.0265149	0	0	0
ENST00000260762.10	chr10	406	1	3564	2382	8	1129	EXOC6	TAG	TAGA	36.1805	25.4604	0	9.82681	0.0101517	0.0106887	0	0.008704	0.814321
ENST00000338779.11	chr16	622	-1	4979	2211	256	2467	MTSS1L	TGA	TGAT	13.8469	4.46673	0	9.38014	0.00278105	0.00202023	0	0.00380224	1.88208
ENST00000265022.8	chr3	897	-1	5802	2343	531	2883	DGKG	TAA	TAAA	0.893346	0.446673	0	0.446673	0.000153972	0.000190642	0	0.000154933	0.812695
ENST00000558984.1	chr14	222	-1	1705	1194	181	285	BMP4	TGA	TGAG	1.78669	1.78669	0	0	0.00104791	0.00149639	0	0	0
ENST00000515669.5	chr5	321	1	1573	588	258	682	C5orf30	TGA	TGAA	30.3738	17.8669	4.91341	5.36008	0.0193095	0.0303859	0.0190442	0.00785935	0.258651
ENST00000448372.5	chr12	295	-1	4679	1902	390	2342	SENP1	TGA	TGAA	59.4075	28.1404	8.48679	20.9936	0.0126966	0.0147952	0.021761	0.00896398	0.605872
ENST00000616640.1	chr10	66	1	1537	819	591	82	RPP38	TAA	TAAT	8.93346	8.48679	0.446673	0	0.00581227	0.0103624	0.000755792	0	0
ENST00000258742.10	chr7	111	1	1571	1239	32	255	NUPL2	TAA	TAAA	33.9472	30.8205	1.78669	0	0.0216086	0.0248753	0.0558342	0	0
ENST00000304735.4	chr16	154	1	2816	1989	149	633	VASN	TAA	TAAG	0.893346	0.893346	0	0	0.00031724	0.000449144	0	0	0
ENST00000520733.5	chr8	462	1	369	162	126	36	UTP23	TAA	TAAA	3.12671	1.34002	1.34002	0	0.00847348	0.00827173	0.0106351	0	0
ENST00000418929.7	chr19	1015	1	7416	6078	467	826	PRR12	TGA	TGAC	6.7001	5.36008	0	1.34002	0.000903465	0.000881882	0	0.0016223	1.83959
ENST00000269466.8	chr18	160	1	2211	1059	77	1030	ELAC1	TGA	TGAA	2.68004	1.34002	0	0.446673	0.00121214	0.00126536	0	0.000433663	0.342718
ENST00000258173.11	chr16	661	-1	4247	918	37	3247	TMEM231	TAG	TAGA	11.1668	1.34002	0.446673	8.93346	0.00262935	0.00145972	0.0120722	0.0027513	1.88482
ENST00000330288.6	chrX	607	1	1483	219	99	1120	SMIM10	TAG	TAGA	3.12671	0.893346	0	2.23337	0.00210837	0.00407921	0	0.00199408	0.488839
ENST00000306315.9	chr5	372	-1	5958	4506	430	977	ZNF608	TAA	TAAC	12.9535	11.6135	0.446673	0.893346	0.00217414	0.00257734	0.00103877	0.000914377	0.354775
ENST00000369755.4	chr10	540	1	7827	3675	600	3507	SLK	TAA	TAAC	278.277	182.689	0.893346	90.6747	0.0355535	0.0497114	0.00148891	0.0258553	0.520109
ENST00000295522.4	chr3	920	-1	3446	603	234	2564	CLDN1	TGA	TGAC	98.7148	11.6135	0	86.2079	0.0286462	0.0192595	0	0.0336224	1.74575
ENST00000409663.7	chr4	579	1	5017	4797	46	129	TMEM131L	TGA	TGAA	4.02006	4.02006	0	0	0.000801287	0.000838036	0	0	0
ENST00000561208.6	chr15	59	-1	5486	1401	1077	2963	MEIS2	TAG	TAGT	65.661	37.0739	6.7001	20.547	0.0119688	0.0264624	0.00622108	0.00693452	0.262051
ENST00000394975.3	chr16	402	-1	840	459	62	274	VKORC1	TGA	TGAG	24.1204	6.7001	0	13.4002	0.0287147	0.0145972	0	0.0489058	3.35036
ENST00000257209.8	chr18	120	1	4967	4287	116	519	FHOD3	TGA	TGAC	16.9736	12.5069	0	4.02006	0.00341727	0.00291739	0	0.00774578	2.65504
ENST00000525077.2	chr11	36	1	2166	1167	683	271	CRACR2B	TGA	TGAC	3.12671	1.78669	0	0.893346	0.00144354	0.00153101	0	0.00329648	2.15314
ENST00000445224.6	chr3	792	1	1645	702	318	580	SCHIP1	TGA	TGAA	14.7402	11.6135	0	2.68004	0.00896062	0.0165435	0	0.00462076	0.27931
ENST00000229708.4	chr6	837	1	3211	702	101	2363	ULBP1	TGA	TGAG	4.91341	0.893346	0	4.02006	0.00153018	0.00127257	0	0.00170125	1.33686
ENST00000464873.5	chr3	628	-1	2126	915	745	421	RUVBL1	TGA	TGAC	36.1805	33.9472	0.446673	0.446673	0.0170181	0.0371007	0.000599561	0.00106098	0.0285973
ENST00000354619.9	chr1	1795	-1	4567	1371	196	2955	ERO1B	TAA	TAAT	8.93346	3.57339	0	5.36008	0.00195609	0.00260641	0	0.0018139	0.695939
ENST00000249442.11	chr2	790	1	1341	759	182	355	MTX2	TAG	TAGA	14.7402	12.0602	1.78669	0	0.010992	0.0158896	0.00981699	0	0
ENST00000317483.4	chr6	524	-1	2546	681	148	1672	RAB23	TAA	TAAG	18.3136	9.38014	0	8.93346	0.00719309	0.0137741	0	0.00534298	0.387902
ENST00000344337.11	chr3	583	-1	6888	1584	182	5077	KPNA1	TGA	TGAA	60.7476	12.5069	0.446673	47.794	0.00881933	0.00789574	0.00245425	0.00941383	1.19227
ENST00000273308.9	chr12	487	-1	1450	516	187	702	CNPY2	TGA	TGAA	13.8469	10.7202	1.78669	0.446673	0.00954957	0.0207755	0.00955451	0.000636287	0.0306268
ENST00000010132.6	chr12	35	1	1840	1530	136	129	DYRK4	TGA	TGAC	4.91341	4.91341	0	0	0.00267033	0.00321138	0	0	0
ENST00000570016.5	chr16	349	-1	1346	609	237	455	CDIPT	TGA	TGAC	21.887	6.7001	0.446673	12.9535	0.0162608	0.0110018	0.0018847	0.0284693	2.58769
ENST00000616887.1	chr5	516	1	2568	2454	15	54	PCDHGA9	TGA	TGAG	0.446673	0.446673	0	0	0.000173938	0.000182018	0	0	0
ENST00000369301.3	chr10	572	1	11051	2148	206	8652	NHLRC2	TAG	TAGC	208.15	48.2407	1.34002	158.122	0.0188354	0.0224584	0.00650495	0.0182758	0.813762
ENST00000433867.5	chr19	918	-1	3321	2604	472	200	PRKD2	TGA	TGAG	8.93346	5.80675	0	3.12671	0.00268999	0.00222994	0	0.0156336	7.01077
ENST00000406606.7	chr9	612	-1	4691	2487	-3	2162	VAV2	TGA	TGAC	32.6071	14.2935	32.6071	18.3136	0.006951	0.0057473	-10.869	0.00847068	1.47385
ENST00000373795.7	chr1	383	-1	2300	1452	142	661	SRSF4	TAA	TAAC	15.1869	7.59345	0	6.7001	0.006603	0.00522965	0	0.0101363	1.93824
ENST00000245121.9	chr18	140	1	2833	1368	188	1232	KATNAL2	TGA	TGAA	7.14677	4.91341	0.446673	0.893346	0.00252269	0.00359167	0.00237592	0.000725119	0.201889
ENST00000255559.7	chr17	879	-1	2737	975	88	1629	SLC39A11	TAG	TAGG	4.91341	0.446673	0	4.46673	0.00179518	0.000458126	0	0.00274201	5.98527
ENST00000589498.5	chr18	58	-1	2117	210	145	1717	ZNF519	TAG	TAGA	8.93346	1.34002	1.78669	3.12671	0.00421987	0.00638105	0.012322	0.00182103	0.285381
ENST00000271651.8	chr1	1066	-1	1629	957	42	585	CTSK	TGA	TGAC	0.893346	0.446673	0	0.446673	0.000548402	0.000466743	0	0.000763544	1.6359
ENST00000259324.5	chr9	540	1	4619	2400	517	1657	LRRC8A	TGA	TGAG	48.2407	23.6737	0.893346	23.6737	0.010444	0.00986403	0.00172794	0.0142871	1.4484
ENST00000422959.6	chr7	345	1	3525	2223	196	1061	PHTF2	TGA	TGAC	25.0137	16.9736	0	8.04012	0.00709609	0.00763544	0	0.00757787	0.99246
ENST00000305409.3	chr2	1024	-1	2434	1821	85	483	SCG2	TAA	TAAG	204.576	168.842	9.38014	22.7803	0.0840494	0.0927197	0.110355	0.0471643	0.508676
ENST00000269571.9	chr17	469	1	4545	3735	153	612	ERBB2	TGA	TGAA	8.48679	6.7001	0	1.78669	0.00186728	0.00179387	0	0.00291943	1.62745
ENST00000569847.1	chr16	251	-1	1830	1179	520	86	GPRC5B	TGA	TGAA	0.446673	0	0	0.446673	0.000244084	0	0	0.00519387	0
ENST00000381259.5	chr12	238	1	2334	1293	10	986	CCDC91	TAA	TAAA	34.8405	32.6071	0	1.78669	0.0149274	0.0252182	0	0.00181206	0.0718553
ENST00000264108.5	chr2	761	1	1634	1227	34	328	HAT1	TAA	TAAA	62.0876	58.5142	0.893346	0.446673	0.0379973	0.0476888	0.0262749	0.00136181	0.0285561
ENST00000652680.1	chr6	451	1	1998	1338	203	412	SLC29A1	TGA	TGAC	19.2069	7.59345	0	10.2735	0.00961309	0.00567522	0	0.0249356	4.39377
ENST00000278193.7	chr11	268	-1	4842	561	11	4225	LIN7C	TAA	TAAT	220.21	59.4075	0	155.442	0.0454791	0.105896	0	0.0367911	0.347427
ENST00000334304.10	chr4	120	-1	4577	3933	276	323	ADGRA3	TAA	TAAC	59.8542	59.4075	0	0.446673	0.0130772	0.0151049	0	0.00138289	0.0915524
ENST00000319023.6	chr11	725	1	2773	2088	182	458	NADSYN1	TGA	TGAG	4.02006	3.12671	0	0.446673	0.00144971	0.00149747	0	0.000975269	0.651279
ENST00000369314.2	chr1	1011	1	1178	624	114	395	POLR3GL	TGA	TGAA	10.2735	6.25343	0	3.57339	0.00872112	0.0100215	0	0.00904655	0.902712
ENST00000328703.11	chr1	1172	1	1227	807	207	168	HAX1	TAG	TAGC	46.9007	35.2872	3.57339	4.46673	0.0382239	0.0437264	0.0172627	0.0265877	0.608047
ENST00000289269.7	chr5	498	1	5725	2991	285	2404	PCDHAC2	TGA	TGAG	12.9535	4.91341	0	8.04012	0.00226262	0.00164273	0	0.00334448	2.03592
ENST00000305386.3	chr14	188	1	2687	1311	468	863	MGAT2	TGA	TGAA	65.661	53.6008	5.80675	6.25343	0.0244365	0.0408854	0.0124076	0.00724615	0.177231
ENST00000261866.12	chr15	150	-1	7772	7299	9	419	SPG11	TAG	TAGA	41.9873	41.5406	0	0.446673	0.00540238	0.00569127	0	0.00106605	0.187312
ENST00000368243.6	chr1	1235	-1	920	438	145	292	C1orf61	TGA	TGAT	0.446673	0	0	0.446673	0.000485514	0	0	0.0015297	0
ENST00000258111.5	chr12	587	1	4717	600	439	3633	KCNMB4	TAA	TAAA	8.48679	1.78669	0	6.25343	0.00179919	0.00297782	0	0.00172128	0.578035
ENST00000296370.4	chr4	68	1	471	255	49	122	S100P	TGA	TGAT	5.36008	5.36008	0	0	0.0113802	0.0210199	0	0	0
ENST00000228682.7	chr12	518	1	3972	3288	438	201	GLI1	TAA	TAAA	0.893346	0	0.893346	0	0.000224911	0	0.0020396	0	0
ENST00000263212.10	chr22	67	-1	5149	1332	111	3661	PPM1F	TAG	TAGG	30.3738	3.57339	0	26.8004	0.00589897	0.00268272	0	0.00732051	2.72876
ENST00000611722.1	chr10	384	1	3038	1419	72	1502	IFIT2	TGA	TGAA	16.0802	7.14677	0.893346	8.04012	0.00529303	0.00503648	0.0124076	0.00535294	1.06283
ENST00000510038.1	chr5	434	-1	1314	1086	126	57	H2AFY	TAG	TAGG	175.989	150.529	1.78669	14.2935	0.133934	0.138609	0.0141801	0.250764	1.80915
ENST00000344697.3	chr3	194	-1	2547	1710	343	449	POMGNT2	TAG	TAGC	6.25343	2.68004	0.446673	2.68004	0.00245521	0.00156727	0.00130225	0.00596891	3.80846
ENST00000548985.1	chr12	344	1	677	141	263	228	COX14	TAG	TAGA	11.1668	4.46673	1.34002	2.68004	0.0164946	0.031679	0.00509513	0.0117546	0.371053
ENST00000371141.8	chr20	404	1	4937	945	718	3229	STX16	TAA	TAAG	63.8743	22.7803	3.57339	36.6272	0.0129379	0.0241062	0.00497686	0.0113432	0.470552
ENST00000348335.6	chr17	56	-1	3563	1485	143	1890	CAMKK1	TGA	TGAG	1.78669	1.34002	0	0.446673	0.000501457	0.00090237	0	0.000236335	0.261905
ENST00000372422.7	chr6	438	-1	1507	1020	113	329	YIPF3	TGA	TGAC	4.91341	4.91341	0	0	0.00326039	0.00481706	0	0	0
ENST00000616435.5	chr14	256	1	2347	903	67	1332	JKAMP	TGA	TGAG	29.9271	23.227	0.446673	4.46673	0.0127512	0.025722	0.00666676	0.0033534	0.130371
ENST00000325795.7	chr2	834	-1	2692	429	781	1437	ORMDL1	TGA	TGAA	50.9207	21.4403	5.80675	23.227	0.0189156	0.0499774	0.00743502	0.0161635	0.323417
ENST00000296585.10	chr5	137	1	7843	3513	111	4174	ITGA2	TGA	TGAA	184.029	28.1404	0	155.442	0.0234642	0.00801037	0	0.0372406	4.64905
ENST00000398706.6	chr10	312	1	6062	5496	249	272	ZSWIM8	TGA	TGAG	2.68004	2.23337	0	0	0.000442105	0.000406362	0	0	0
ENST00000263663.10	chr2	30	1	2267	1734	62	426	TAF1B	TGA	TGAG	15.1869	13.4002	1.78669	0	0.00669911	0.00772791	0.0288176	0	0
ENST00000382409.3	chr11	27	-1	2500	1665	479	311	DEAF1	TGA	TGAG	115.242	100.055	0	14.7402	0.0460967	0.060093	0	0.0473962	0.788714
ENST00000366996.1	chr1	1656	-1	2035	1080	810	100	LPGAT1	TAG	TAGG	54.0475	48.6874	2.23337	1.34002	0.0265589	0.0450809	0.00275724	0.0134002	0.297248
ENST00000250699.2	chr11	80	-1	1945	1320	66	514	CHRNA10	TGA	TGAG	1.34002	0	0	1.34002	0.000688956	0	0	0.00260704	0
ENST00000367576.6	chr6	810	1	1853	1395	134	279	LTV1	TAG	TAGA	25.4604	23.227	1.78669	0	0.0137401	0.0166502	0.0133335	0	0
ENST00000291416.10	chr1	430	-1	3817	1395	605	1772	TRIM62	TAG	TAGT	8.04012	1.34002	0	6.7001	0.0021064	0.000960588	0	0.00378109	3.93623
ENST00000357077.9	chr4	467	1	14215	11841	70	2259	ANK2	TAA	TAAA	22.7803	14.2935	0	8.48679	0.00160256	0.00120712	0	0.00375688	3.11226
ENST00000507420.1	chr4	66	1	563	351	99	68	MRFAP1	TGA	TGAG	26.8004	13.4002	1.78669	7.59345	0.0476028	0.0381772	0.0180474	0.111668	2.925
ENST00000311915.12	chr12	551	-1	2698	1374	22	1257	C12orf66	TGA	TGAG	3.12671	0.893346	0	2.23337	0.0011589	0.000650179	0	0.00177674	2.7327
ENST00000394825.6	chr12	370	1	2485	1764	123	553	NR4A1	TGA	TGAC	0.893346	0.446673	0	0.446673	0.000359496	0.000253216	0	0.000807727	3.18987
ENST00000591952.5	chr17	975	1	582	222	3	312	AFMID	TGA	TGAC	8.48679	3.57339	0	4.91341	0.0145821	0.0160963	0	0.0157481	0.978365
ENST00000254976.6	chr20	83	1	2053	588	205	1215	SNAP25	TAA	TAAG	9.82681	3.57339	0.893346	4.91341	0.00478656	0.00607719	0.00435779	0.00404396	0.665432
ENST00000263245.10	chr22	314	-1	2728	1518	85	1080	ARFGAP3	TAA	TAAT	19.2069	13.4002	0	5.36008	0.00704067	0.00882753	0	0.00496304	0.562222
ENST00000648613.1	chr10	574	-1	7343	2664	398	4236	CCDC186	TAA	TAAA	31.7138	14.7402	1.34002	15.1869	0.00431892	0.00553311	0.00336688	0.0035852	0.647953
ENST00000564138.6	chr16	682	1	8666	3765	175	4681	PLCG2	TAG	TAGA	1.78669	1.78669	0	0	0.000206173	0.000474553	0	0	0
ENST00000348956.7	chr14	518	-1	1420	1113	71	191	CKB	TGA	TGAA	63.8743	52.2608	0	8.93346	0.0449819	0.0469549	0	0.0467721	0.996107
ENST00000380516.7	chr15	231	-1	4168	3072	108	943	SLTM	TGA	TGAA	75.4878	64.3209	0	9.82681	0.0181113	0.0209378	0	0.0104208	0.497702
ENST00000360409.7	chr2	908	1	6662	2763	785	3069	NRP2	TGA	TGAC	13.4002	5.80675	0.446673	7.14677	0.00201144	0.00210161	0.000569011	0.0023287	1.10805
ENST00000369682.4	chrX	749	1	10885	5583	169	5088	PLXNA3	TAA	TAAG	2.68004	1.34002	0	1.34002	0.000246214	0.000240018	0	0.000263369	1.09729
ENST00000312037.6	chr5	581	-1	712	423	202	42	RPS14	TGA	TGAA	240.757	222.443	6.7001	0	0.338142	0.525871	0.0331688	0	0
ENST00000368709.5	chr1	1149	-1	457	261	61	90	S100A2	TGA	TGAA	25.907	22.7803	1.34002	0.446673	0.0566894	0.087281	0.0219675	0.00496304	0.0568627
ENST00000398013.7	chr15	8	1	2280	1050	322	863	NIPA2	TAA	TAAG	150.529	64.7676	8.93346	75.4878	0.0660214	0.0616834	0.0277437	0.0874714	1.41807
ENST00000263033.9	chrX	413	-1	2335	1983	182	125	SYTL4	TGA	TGAG	3.12671	2.23337	0.446673	0.446673	0.00133906	0.00112626	0.00245425	0.00357339	3.1728
ENST00000242351.10	chr7	685	-1	7177	2676	383	4073	ZC3HAV1	TAG	TAGA	177.329	32.1605	0	145.169	0.024708	0.0120181	0	0.0356417	2.96567
ENST00000470557.2	chr17	797	-1	4114	507	3441	121	PTRH2	TAG	TAGG	4.91341	2.68004	2.23337	0	0.00119431	0.00528607	0.000649046	0	0
ENST00000284776.11	chr4	683	-1	5996	3270	504	2177	SORBS2	TGA	TGAA	2.68004	1.78669	0.446673	0.446673	0.000446971	0.000546389	0.000886256	0.000205178	0.375517
ENST00000339664.6	chr9	363	1	3021	1848	123	1005	ZNF189	TAA	TAAA	19.2069	12.9535	0	6.25343	0.00635781	0.00700948	0	0.00622231	0.887699
ENST00000606911.6	chr1	1459	1	8704	1719	185	6755	TOR1AIP1	TAA	TAAG	105.862	61.1942	0.446673	43.3273	0.0121624	0.0355987	0.00241445	0.00641411	0.180178
ENST00000537259.5	chr15	284	1	3983	3006	618	314	SLC24A1	TAA	TAAT	4.91341	3.12671	1.78669	0	0.00123359	0.00104016	0.00289109	0	0
ENST00000481445.1	chrX	378	1	2471	210	110	2106	COX7B	TAA	TAAT	108.988	65.2143	38.8606	0.893346	0.0441069	0.310544	0.353278	0.000424191	0.00136596
ENST00000261438.10	chr4	143	1	5594	1005	296	4248	KLF3	TGA	TGAT	54.0475	9.82681	1.78669	41.9873	0.00966168	0.00977792	0.00603612	0.00988401	1.01085
ENST00000394089.6	chr17	487	1	2024	1356	524	99	RARA	TGA	TGAC	0.446673	0.446673	0	0	0.000220688	0.000329405	0	0	0
ENST00000294244.9	chr11	558	1	1954	1113	225	571	SPINDOC	TAA	TAAA	41.9873	25.907	0.446673	15.1869	0.0214879	0.0232768	0.00198521	0.026597	1.14264
ENST00000357765.6	chr2	485	1	1143	747	146	205	UNC50	TAA	TAAA	11.6135	7.59345	3.57339	0	0.0101605	0.0101653	0.0244752	0	0
ENST00000335016.9	chr4	331	1	3804	3453	160	146	BMP2K	TAG	TAGA	41.0939	37.9672	0	3.12671	0.0108028	0.0109954	0	0.0214158	1.9477
ENST00000395288.6	chr11	361	-1	2460	1524	165	726	KBTBD4	TAA	TAAG	14.2935	8.04012	1.34002	3.57339	0.00581038	0.00527567	0.00812133	0.00492202	0.932966
ENST00000269033.7	chr17	346	-1	9327	4239	146	4897	SSH2	TGA	TGAT	51.8141	13.8469	0	37.9672	0.00555528	0.00326654	0	0.00775316	2.37351
ENST00000334220.9	chr14	366	1	2813	1329	32	1407	DLST	TAG	TAGG	41.5406	12.5069	0	28.5871	0.0147674	0.00941072	0	0.0203178	2.159
ENST00000303383.8	chr16	429	-1	5177	1986	14	3132	SHCBP1	TGA	TGAC	34.8405	14.7402	0	20.1003	0.00672987	0.00742206	0	0.00641772	0.864681
ENST00000396908.8	chr19	630	1	2149	1410	57	637	PROSER3	TGA	TGAA	1.34002	0	0	1.34002	0.000623555	0	0	0.00210364	0
ENST00000535902.6	chr12	157	-1	5532	1263	259	3965	MANSC1	TAA	TAAG	6.7001	3.57339	0	2.68004	0.00121115	0.00282928	0	0.000675924	0.238903
ENST00000393486.5	chr7	572	1	4393	708	379	3261	MDFIC	TAA	TAAA	159.909	61.6409	0.893346	97.3748	0.0364009	0.0870634	0.00235711	0.0298604	0.342973
ENST00000261778.2	chr16	599	1	4893	3252	81	1515	TANGO6	TAG	TAGA	9.82681	6.25343	0	3.57339	0.00200834	0.00192295	0	0.00235867	1.22659
ENST00000506646.5	chr4	4	-1	935	366	153	371	ZNF721	TAG	TAGG	10.7202	5.36008	3.57339	0.446673	0.0114654	0.014645	0.0233555	0.00120397	0.0822102
ENST00000261558.8	chr14	241	1	11675	1440	338	9852	AP5M1	TAA	TAAT	97.3748	41.9873	9.82681	45.114	0.00834045	0.0291578	0.0290734	0.00457917	0.157048
ENST00000341460.6	chr1	775	-1	5466	3552	14	1855	SYDE2	TGA	TGAG	7.14677	4.02006	0	3.12671	0.0013075	0.00113177	0	0.00168556	1.48931
ENST00000282878.6	chr5	166	1	8861	651	128	8037	RAB3C	TAG	TAGT	41.0939	4.02006	0.893346	35.7339	0.00463762	0.00617521	0.00697927	0.00444617	0.720003
ENST00000341976.5	chr22	82	-1	6940	1308	475	5112	ZNF70	TAG	TAGA	22.7803	7.14677	0.893346	14.7402	0.00328247	0.00546389	0.00188073	0.00288345	0.527729
ENST00000279392.7	chr16	355	-1	3388	1638	825	880	HIRIP3	TGA	TGAG	5.80675	4.46673	0.893346	0.446673	0.00171392	0.00272694	0.00108284	0.000507583	0.186136
ENST00000396668.8	chr7	73	1	12351	792	128	11386	TMEM106B	TAA	TAAA	62.5343	17.8669	0.446673	44.2207	0.00506309	0.0225593	0.00348963	0.00388377	0.172159
ENST00000229922.7	chr6	75	1	2925	1401	147	1332	CAP2	TAA	TAAC	11.6135	7.14677	0.446673	3.57339	0.00397043	0.00510119	0.00303859	0.00268272	0.525901
ENST00000306480.11	chr4	621	-1	9953	783	81	9044	TMEM192	TGA	TGAG	61.1942	12.5069	0.893346	46.454	0.00614832	0.015973	0.011029	0.00513645	0.321571
[truncated: 10,728 more rows]

## Sheet: Calu6_G418_RNAseq_rep1
#transcript	chrom	featnum	strand	mrnalen	cdslen	utr5len	utr3len	gene_name	stopcodon	stop4nt	mrnaCounts	cdsCounts	utr5Counts	utr3Counts	mrnaDensity	cdsDensity	utr5Density	utr3Density	utr3_occupancy
[truncated: 12,814 more rows]

[truncated: 4 more sheets: Calu6_G418_RNAseq_rep2, Calu5_Untr_RPF_rep1, Calu6_G418_RPF_rep1, Calu6_stop_metagene]
