# Supplementary material for: Stop codon context influences genome-wide stimulation of termination codon readthrough by aminoglycosides
Source: eLife. 2020 Jan 23;9:e52611. doi: 10.7554/eLife.52611 (PMC7089771; doi:10.7554/eLife.52611)
Supplement: Figure 7—source data 1. [file elife-52611-fig7-data1.xlsx]

## Sheet: Untr vs G418 - 0.5 mg|mL 24hr
	tr_id	mRNA_log2FC	RPF_log2FC	log2FC_TE_v1	pvalue_v1	control_log2TE	g418_500_log2TE	log2FC_TE_v2	pvalue_v2	log2FC_TE_final	pvalue_final	pvalue.adjust	CI(95%)	chrom	featnum	strand	mrna_len	cds_len	X5utr_len	X3utr_len	gene_name	stopcodon	stop4nt
1	ENST00000000233.10	-0.0493229	0.280317	0.328958	0.0145731	0.571763	0.901403	0.330106	0.0253616	0.330106	0.0253616	0.325349	[0.04,0.62]	chr7	612	1	1032	543	88	401	ARF5	TAA	TAAC
2	ENST00000000412.8	-0.0857213	0.161974	0.246816	0.129865	-0.596695	-0.349	0.248712	0.230672	0.248712	0.230672	0.7959	[-0.16,0.66]	chr12	112	-1	2450	834	159	1457	M6PR	TAG	TAGA
3	ENST00000001008.6	-0.0184131	0.000219428	0.0183714	0.823576	0.315159	0.333791	0.0187752	0.838647	0.0187752	0.838647	0.988946	[-0.16,0.2]	chr12	17	1	3715	1380	170	2165	FKBP4	TAG	TAGC
4	ENST00000002165.10	0.0313102	0.138991	0.106995	0.44699	0.0586725	0.166353	0.108275	0.521779	0.108275	0.521779	0.927676	[-0.22,0.44]	chr6	808	-1	2356	1404	56	896	FUCA2	TAA	TAAA
5	ENST00000003100.13	0.0411282	0.0605066	0.018722	0.870074	-0.502151	-0.482773	0.0199621	0.889464	0.0199621	0.889464	0.989347	[-0.27,0.31]	chr7	380	-1	3155	1530	113	1512	CYP51A1	TGA	TGAA
6	ENST00000003302.8	0.0719103	-0.233666	-0.306991	0.125308	-1.20148	-1.50706	-0.304758	0.252196	-0.304758	0.252196	0.809647	[-0.82,0.22]	chr11	954	-1	4669	3234	69	1366	USP28	TAA	TAAG
7	ENST00000005286.8	-0.0926329	0.0518551	0.141921	0.534247	0.557394	0.701882	0.145835	0.552234	0.145835	0.552234	0.939217	[-0.34,0.63]	chr11	482	1	3480	3075	153	252	TMEM132A	TGA	TGAC
8	ENST00000005340.10	-0.0242267	0.115839	0.138486	0.458232	-0.0908631	0.0492026	0.141366	0.527781	0.141366	0.527781	0.932845	[-0.3,0.59]	chr17	126	-1	2989	2211	255	523	DVL2	TAG	TAGC
9	ENST00000005386.8	0.0474886	0.167021	0.118293	0.452944	0.279515	0.399048	0.120527	0.515095	0.120527	0.515095	0.927676	[-0.24,0.49]	chr12	287	-1	4339	1998	85	2256	RPAP3	TGA	TGAT
10	ENST00000006777.11	-0.0094268	0.0847626	0.0921281	0.69131	0.431082	0.525271	0.0956883	0.712111	0.0956883	0.712111	0.977152	[-0.42,0.61]	chr7	325	1	1721	1095	49	577	RHBDD2	TGA	TGAG
11	ENST00000007390.3	-0.0293264	0.438708	0.465969	0.041928	-0.54058	-0.0725456	0.471016	0.105288	0.471016	0.105288	0.630366	[-0.1,1.05]	chr16	51	-1	1210	939	74	197	TSR3	TGA	TGAG
12	ENST00000007516.8	0.0773242	-0.172879	-0.250843	0.029224	1.60921	1.35901	-0.249939	0.0238353	-0.250843	0.029224	0.350266	[-0.48,-0.03]	chr16	290	-1	665	471	26	168	NDUFAB1	TAA	TAAA
13	ENST00000011473.6	-0.0311805	-0.0974765	-0.0678333	0.674348	1.06152	0.995219	-0.0656333	0.698798	-0.0656333	0.698798	0.976376	[-0.4,0.27]	chr7	540	-1	2127	780	47	1300	SYPL1	TAA	TAAT
14	ENST00000011619.6	-0.0622529	-0.20611	-0.1461	0.467067	-0.146674	-0.290532	-0.143046	0.55733	-0.143046	0.55733	0.940661	[-0.62,0.34]	chr6	65	-1	3384	2190	330	864	RANBP9	TAG	TAGC
15	ENST00000012443.8	0.0119363	-0.13911	-0.151994	0.224119	0.622299	0.471253	-0.150635	0.271493	-0.150635	0.271493	0.821909	[-0.42,0.12]	chr19	911	1	2109	1500	103	506	PPP5C	TGA	TGAG
16	ENST00000013070.11	0.00980892	-0.0281026	-0.0389624	0.821629	-0.562798	-0.600709	-0.0367718	0.868007	-0.0367718	0.868007	0.989347	[-0.47,0.4]	chr14	448	1	3494	1278	36	2180	UBR7	TAG	TAGA
17	ENST00000013125.8	0.00506696	0.241529	0.234954	0.285144	-1.54737	-1.31091	0.238734	0.435398	0.238734	0.435398	0.908599	[-0.36,0.85]	chr14	200	-1	4354	2541	319	1494	MAP4K5	TAA	TAAG
18	ENST00000014930.9	-0.320616	0.398756	0.715405	0.0339019	1.41257	2.13194	0.721932	0.013283	0.715405	0.0339019	0.380483	[0.05,1.33]	chr12	166	-1	1159	570	151	438	HEBP1	TGA	TGAG
19	ENST00000022615.9	0.0454151	-0.123101	-0.168892	0.0967894	0.367331	0.198815	-0.168255	0.146759	-0.168255	0.146759	0.710155	[-0.4,0.06]	chr8	226	1	1418	852	91	475	VDAC3	TAA	TAAT
20	ENST00000025008.10	0.0411033	-0.300945	-0.343012	0.0483561	-1.71924	-2.06128	-0.341391	0.146165	-0.341391	0.146165	0.708245	[-0.8,0.12]	chr8	250	-1	6636	4785	527	1324	RB1CC1	TAA	TAAC
21	ENST00000025301.4	-0.029558	0.0254975	0.0536191	0.75762	-0.22415	-0.169094	0.0561167	0.791235	0.0561167	0.791235	0.987349	[-0.36,0.48]	chr13	113	1	9915	5706	176	4033	AKAP11	TAG	TAGA
22	ENST00000037243.7	0.182733	-0.16274	-0.346291	0.0125487	0.709341	0.363867	-0.344993	0.0271113	-0.344993	0.0271113	0.338264	[-0.65,-0.04]	chr16	662	1	974	354	108	512	GABARAPL2	TGA	TGAG
23	ENST00000037869.7	0.0644121	0.225038	0.159638	0.327219	-1.58887	-1.42825	0.16206	0.472921	0.16206	0.472921	0.922714	[-0.28,0.61]	chr2	326	-1	1810	417	79	1314	FAM136A	TAA	TAAA
24	ENST00000040663.8	0.0248743	0.0111481	-0.0144564	0.917627	-0.112484	-0.12621	-0.0132466	0.940558	-0.0132466	0.940558	0.995968	[-0.35,0.33]	chr19	369	1	3178	1110	67	2001	MRI1	TAA	TAAC
25	ENST00000040738.10	-0.00971803	-0.123628	-0.115116	0.51049	-0.362823	-0.476733	-0.113031	0.606949	-0.113031	0.606949	0.953842	[-0.54,0.32]	chr4	96	-1	10567	9156	138	1273	BOD1L1	TAA	TAAT
26	ENST00000040877.2	0.0452972	0.127075	0.080749	0.597663	-0.57282	-0.491043	0.0829212	0.672265	0.0829212	0.672265	0.970985	[-0.3,0.47]	chr1	1785	-1	5206	4866	76	264	TARBP1	TGA	TGAT
27	ENST00000042381.9	-0.200802	-0.0406674	0.153765	0.711481	2.25638	2.41651	0.161491	0.574141	0.153765	0.711481	0.977152	[-0.63,0.86]	chr16	566	1	4092	3660	109	323	RIPOR1	TAA	TAAA
28	ENST00000053468.4	0.0631913	0.239964	0.175766	0.305057	-0.726497	-0.549724	0.177989	0.424759	0.177989	0.424759	0.905902	[-0.26,0.62]	chr6	406	-1	2100	606	12	1482	MRPS10	TAA	TAAA
29	ENST00000053867.8	0.0175495	-0.0785628	-0.0969154	0.483563	1.49997	1.40385	-0.0958709	0.44954	-0.0969154	0.483563	0.922714	[-0.38,0.18]	chr17	633	1	2130	1782	40	308	GRN	TGA	TGAG
30	ENST00000054666.11	-0.0796567	-0.0133259	0.0651693	0.740254	-1.66972	-1.60339	0.0676831	0.801061	0.0676831	0.801061	0.987866	[-0.47,0.61]	chr1	97	1	2178	303	88	1787	VAMP3	TGA	TGAA
31	ENST00000055077.8	0.0125331	-0.0675423	-0.081026	0.550386	0.213408	0.133332	-0.0794976	0.615108	-0.0794976	0.615108	0.954531	[-0.39,0.23]	chr7	310	-1	1685	1065	16	604	RFC2	TAG	TAGA
32	ENST00000060969.5	-0.0790575	0.222963	0.300655	0.116726	-1.19505	-0.893031	0.303788	0.239416	0.303788	0.239416	0.803106	[-0.2,0.82]	chr1	951	-1	2190	624	70	1496	SIKE1	TAA	TAAC
33	ENST00000066544.8	-0.035009	0.00713842	0.0414993	0.764793	-1.35827	-1.31613	0.04285	0.817068	0.04285	0.817068	0.988946	[-0.32,0.41]	chr17	670	-1	5830	2475	123	3232	CDC27	TAA	TAAC
34	ENST00000078429.9	-0.128248	0.58221	0.708739	0.00052159	-1.33945	-0.628994	0.713572	0.0112094	0.713572	0.0112094	0.213843	[0.16,1.28]	chr19	96	1	4190	1080	290	2820	GNA11	TGA	TGAG
35	ENST00000081029.8	0.0265044	-0.0551504	-0.082706	0.563219	0.310109	0.228454	-0.0810045	0.627562	-0.0810045	0.627562	0.956593	[-0.41,0.25]	chr12	235	1	1829	972	12	845	MRPS35	TGA	TGAA
36	ENST00000083182.8	0.0278101	0.0251937	-0.00406224	0.984203	-1.01822	-1.02084	-0.00132066	0.999224	-0.00132066	0.999224	0.999541	[-0.54,0.55]	chr17	806	-1	6492	1758	311	4423	APPBP2	TGA	TGAG
37	ENST00000155674.9	-0.0782685	-0.0299184	0.0471614	0.776645	-0.0199214	0.0284286	0.0489367	0.80276	0.0489367	0.80276	0.988052	[-0.34,0.44]	chr22	5	-1	1735	1182	43	510	HDHD5	TGA	TGAG
38	ENST00000156109.7	0.0339285	-0.160865	-0.197516	0.391331	0.889158	0.694364	-0.193565	0.444131	-0.193565	0.444131	0.914444	[-0.69,0.3]	chrX	216	-1	1658	1431	13	214	GPKOW	TGA	TGAC
39	ENST00000156471.10	0.0556108	-0.0593538	-0.116498	0.516042	-0.129262	-0.244227	-0.114039	0.604039	-0.114039	0.604039	0.953842	[-0.54,0.32]	chr15	55	-1	9597	4458	129	5010	AQR	TAG	TAGC
40	ENST00000157812.6	0.0518472	-0.109772	-0.162123	0.156961	1.08331	0.921692	-0.161295	0.17559	-0.161295	0.17559	0.752267	[-0.39,0.07]	chr19	738	1	1591	1257	198	136	PSMC4	TGA	TGAC
41	ENST00000158771.9	-0.0571041	0.0388445	0.093887	0.678475	-0.529258	-0.43331	0.0979323	0.732339	0.0979323	0.732339	0.980673	[-0.47,0.67]	chr17	103	-1	4167	720	17	3430	DERL2	TAA	TAAA
42	ENST00000159111.9	-0.104886	0.0502991	0.152638	0.51064	0.458613	0.613798	0.156357	0.539268	0.156357	0.539268	0.933437	[-0.35,0.66]	chr19	151	1	5604	3291	226	2087	KDM4B	TAG	TAGG
43	ENST00000160827.8	-0.0529932	-0.246345	-0.194288	0.117515	0.82705	0.633698	-0.19309	0.143076	-0.19309	0.143076	0.705215	[-0.45,0.07]	chr16	346	1	2113	1998	40	75	KIF22	TGA	TGAC
44	ENST00000161863.9	0.116903	-0.00865579	-0.126682	0.403577	0.103938	-0.0216206	-0.125017	0.495024	-0.125017	0.495024	0.923469	[-0.48,0.23]	chr5	340	1	6305	4293	202	1810	YTHDC2	TGA	TGAC
45	ENST00000162044.13	0.00941531	-0.122463	-0.133304	0.415536	1.65856	1.52668	-0.131622	0.380594	-0.133304	0.415536	0.903915	[-0.47,0.19]	chr19	506	-1	1820	1440	65	315	TMEM161A	TAG	TAGC
46	ENST00000162330.10	0.0284076	-0.0815729	-0.113936	0.655196	1.09647	0.986492	-0.108769	0.68188	-0.108769	0.68188	0.973332	[-0.62,0.41]	chr16	656	-1	4085	2613	142	1330	BCAR1	TGA	TGAG
47	ENST00000166345.8	-0.00396328	-0.0366993	-0.0337878	0.813999	-0.277394	-0.31013	-0.0322651	0.856797	-0.0322651	0.856797	0.988946	[-0.38,0.32]	chr5	10	1	2431	1299	115	1017	TRIP13	TGA	TGAT
48	ENST00000168216.10	0.0328296	-0.186982	-0.220468	0.0656886	0.807807	0.587995	-0.219685	0.0909821	-0.219685	0.0909821	0.601904	[-0.47,0.04]	chrX	266	-1	960	786	28	146	HSD17B10	TGA	TGAA
49	ENST00000170447.12	-0.0145099	0.172654	0.185761	0.304028	-0.684628	-0.497464	0.18857	0.418865	0.18857	0.418865	0.904503	[-0.27,0.65]	chr3	57	1	2775	1251	64	1460	MKRN2	TAA	TAAA
50	ENST00000173527.6	-0.0553939	0.0899191	0.143857	0.389564	-0.209481	-0.0641677	0.14617	0.472622	0.14617	0.472622	0.922714	[-0.25,0.55]	chr5	386	1	1942	897	18	1027	ISOC1	TAG	TAGG
51	ENST00000175091.5	-0.0369269	0.0055706	0.0415081	0.771345	1.32694	1.36944	0.0428052	0.75795	0.0415081	0.771345	0.985535	[-0.24,0.32]	chr2	64	-1	1365	702	108	555	LAPTM4A	TGA	TGAA
52	ENST00000179259.6	-0.0171386	-0.0618819	-0.0467626	0.829199	-0.26231	-0.307054	-0.043093	0.875124	-0.043093	0.875124	0.989347	[-0.58,0.49]	chr12	30	1	8209	813	59	7337	TIGAR	TAA	TAAG
53	ENST00000181839.10	0.0252344	-0.11276	-0.139447	0.489832	-1.01307	-1.15107	-0.136891	0.609982	-0.136891	0.609982	0.954353	[-0.66,0.39]	chr7	188	1	9525	4539	386	4600	CDK13	TGA	TGAG
54	ENST00000184266.3	0.0590289	-0.163795	-0.223711	0.0811237	1.07433	0.851507	-0.222397	0.100434	-0.222397	0.100434	0.616913	[-0.49,0.04]	chr3	563	1	651	390	24	237	NDUFB4	TAA	TAAG
55	ENST00000186436.10	-0.0711885	0.194782	0.264249	0.200501	0.253961	0.519932	0.267461	0.260493	0.267461	0.260493	0.810325	[-0.2,0.74]	chr2	480	-1	6701	5652	286	763	TMEM131	TAA	TAAA
56	ENST00000188312.6	0.142384	0.155067	0.0110715	0.955008	0.341763	0.354446	0.0140369	0.946367	0.0110715	0.955008	0.997603	[-0.36,0.38]	chr12	680	1	2464	1191	765	508	ACTR6	TAA	TAAG
57	ENST00000193403.10	-0.10367	0.104513	0.206948	0.172134	0.744096	0.952278	0.208935	0.19362	0.208935	0.19362	0.758005	[-0.11,0.53]	chr14	311	-1	3779	2679	384	716	ACTN1	TAA	TAAT
58	ENST00000196061.5	0.0324752	0.262074	0.228434	0.129813	0.0236733	0.253272	0.230516	0.192844	0.230516	0.192844	0.758005	[-0.12,0.58]	chr1	145	1	2976	2184	63	729	PLOD1	TAA	TAAT
59	ENST00000196371.10	-0.0502256	0.0250676	0.0738497	0.682802	-0.0170032	0.0582899	0.076137	0.722176	0.076137	0.722176	0.978769	[-0.35,0.5]	chr5	116	-1	3294	1563	67	1664	OXCT1	TGA	TGAA
60	ENST00000196551.8	-0.0560736	-0.159164	-0.103388	0.164167	0.199239	0.0961483	-0.102968	0.206623	-0.102968	0.206623	0.770737	[-0.26,0.06]	chr19	1272	1	741	615	72	54	RPS5	TGA	TGAT
61	ENST00000197268.13	0.0231939	0.0856766	0.0599983	0.788161	0.32062	0.383102	0.0638837	0.801149	0.0638837	0.801149	0.987866	[-0.44,0.58]	chr12	167	1	4711	1869	23	2819	FAM234B	TAA	TAAT
62	ENST00000199320.9	-0.0683994	0.310583	0.377346	0.0469087	0.0557211	0.434703	0.380525	0.0898865	0.380525	0.0898865	0.599113	[-0.06,0.83]	chr5	175	-1	2831	942	133	1756	DIMT1	TAG	TAGG
63	ENST00000199389.11	-0.0874191	0.117856	0.204678	0.12177	-0.857739	-0.652464	0.205892	0.230556	0.205892	0.230556	0.7959	[-0.13,0.55]	chr7	49	-1	4411	1893	92	2426	EIF2AK1	TGA	TGAA
64	ENST00000199814.9	-0.00745578	0.156122	0.162515	0.292769	0.169665	0.333243	0.164478	0.36127	0.164478	0.36127	0.869746	[-0.19,0.52]	chr5	585	-1	2299	1263	77	959	RBM22	TAG	TAGC
65	ENST00000200135.8	0.0728003	0.128928	0.0547625	0.736805	0.29524	0.351368	0.0570378	0.760245	0.0570378	0.760245	0.984754	[-0.31,0.43]	chr11	952	-1	2873	2340	26	507	ZW10	TAG	TAGC
66	ENST00000200457.9	0.00615168	-0.0545935	-0.0622389	0.692914	0.85942	0.798675	-0.0600422	0.720115	-0.0600422	0.720115	0.978285	[-0.39,0.27]	chr7	486	1	1693	1431	111	151	TRIP6	TGA	TGAG
67	ENST00000202816.5	0.128449	0.275223	0.145154	0.453686	-0.534269	-0.387496	0.148684	0.55185	0.148684	0.55185	0.939217	[-0.34,0.65]	chr20	90	-1	3216	2556	108	552	ESF1	TAA	TAAC
68	ENST00000203001.7	0.141421	-0.0647622	-0.208278	0.313407	0.132642	-0.073541	-0.205207	0.404134	-0.205207	0.404134	0.897879	[-0.68,0.28]	chr20	72	-1	2929	1494	128	1307	TRMT6	TAA	TAAC
69	ENST00000203166.10	0.00594054	-0.350099	-0.358933	0.130909	0.072444	-0.283595	-0.355338	0.210828	-0.355338	0.210828	0.774163	[-0.91,0.2]	chr19	619	1	4324	1902	60	2362	HAUS5	TGA	TGAA
70	ENST00000203407.6	-0.0828793	-0.0612942	0.0211072	0.833233	0.925352	0.946937	0.0217964	0.833062	0.0211072	0.833233	0.988946	[-0.18,0.22]	chr3	265	-1	1595	1443	26	126	UQCRC1	TAG	TAGG
71	ENST00000204517.11	-0.169402	0.128758	0.295194	0.232471	0.346304	0.644465	0.300108	0.273243	0.300108	0.273243	0.822365	[-0.24,0.84]	chr16	152	-1	2163	1017	277	869	TFAP4	TGA	TGAC
72	ENST00000205061.9	-0.0754488	-0.0616074	0.0129608	0.927507	0.949237	0.963078	0.0141423	0.920842	0.0129608	0.927507	0.994859	[-0.26,0.28]	chr16	646	-1	8261	3612	20	4629	GLG1	TGA	TGAC
73	ENST00000205402.10	0.0691941	-0.16406	-0.233856	0.0379229	0.612051	0.378797	-0.232917	0.0616462	-0.232917	0.0616462	0.507229	[-0.48,0.01]	chr7	553	1	3537	1530	68	1939	DLD	TGA	TGAA
74	ENST00000205636.4	0.0342825	0.264986	0.229977	0.138837	-1.79358	-1.56288	0.231939	0.286329	0.231939	0.286329	0.837435	[-0.2,0.66]	chr3	127	-1	3307	552	107	2648	CMTM6	TAA	TAAA
75	ENST00000206380.8	0.0553006	-0.217685	-0.276666	0.275354	0.402807	0.129821	-0.27151	0.358269	-0.27151	0.358269	0.868157	[-0.85,0.31]	chr17	621	-1	1525	774	11	740	TMEM101	TGA	TGAG
76	ENST00000206451.11	-0.0330961	-0.156126	-0.125173	0.521604	1.25735	1.13432	-0.122586	0.540127	-0.122586	0.540127	0.93365	[-0.51,0.27]	chr14	100	1	965	750	69	146	PSME1	TGA	TGAG
77	ENST00000206542.9	-0.138638	0.249357	0.386169	0.0769658	-0.343948	0.0440475	0.390048	0.149022	0.390048	0.149022	0.713776	[-0.14,0.93]	chr14	21	-1	1976	1008	129	839	OSGEP	TAA	TAAT
78	ENST00000206595.11	0.0439487	-0.0444923	-0.0895655	0.626941	-0.771543	-0.859984	-0.0872749	0.716369	-0.0872749	0.716369	0.978285	[-0.56,0.38]	chr14	132	1	5770	2121	119	3530	G2E3	TAA	TAAA
79	ENST00000209873.9	-0.0272338	-0.23988	-0.21389	0.163322	1.09564	0.882991	-0.212445	0.182463	-0.212445	0.182463	0.752562	[-0.52,0.1]	chr12	414	-1	1815	1641	145	29	AAAS	TAA	TAAG
80	ENST00000210060.12	-0.0953296	-0.190204	-0.0973218	0.64505	0.755675	0.6608	-0.0942582	0.685644	-0.0942582	0.685644	0.973902	[-0.55,0.36]	chr19	338	-1	1345	1110	114	121	DHPS	TGA	TGAG
81	ENST00000210444.6	-0.00619002	0.0880688	0.0931465	0.516459	0.684655	0.778914	0.0947039	0.542888	0.0947039	0.542888	0.934543	[-0.21,0.4]	chr9	343	1	1179	1080	77	22	NANS	TAA	TAAA
82	ENST00000211998.9	0.00611195	0.00832625	0.00150126	0.991472	0.344337	0.346552	0.00256203	0.983691	0.00150126	0.991472	0.999541	[-0.26,0.26]	chr10	317	1	5490	3405	94	1991	VCL	TAG	TAGG
83	ENST00000212015.11	-0.0558297	-0.121566	-0.067381	0.724597	-0.490764	-0.556501	-0.0645021	0.789419	-0.0645021	0.789419	0.987349	[-0.54,0.41]	chr10	242	1	4107	2244	66	1797	SIRT1	TAG	TAGT
84	ENST00000215565.3	-0.012218	0.297122	0.308087	0.0893621	1.1087	1.41804	0.310286	0.0747786	0.308087	0.0893621	0.597356	[-0.05,0.65]	chr19	392	-1	535	414	66	55	NDUFB7	TAG	TAGG
85	ENST00000215567.10	-0.0495329	-0.12842	-0.0796745	0.56582	1.72447	1.64558	-0.0786015	0.534213	-0.0796745	0.56582	0.945217	[-0.36,0.19]	chr19	391	1	1139	927	103	109	TECR	TGA	TGAG
86	ENST00000215570.8	-0.0449265	0.14657	0.190678	0.149349	0.592029	0.783525	0.191828	0.17031	0.191828	0.17031	0.752267	[-0.08,0.47]	chr19	80	-1	1664	288	53	1323	TIMM13	TGA	TGAC
87	ENST00000215574.9	-0.110162	0.763508	0.872474	6.20671e-06	-0.932712	-0.0590423	0.876481	0.000570667	0.876481	0.000570667	0.0300354	[0.38,1.39]	chr19	7	1	1418	711	172	535	CDC34	TGA	TGAC
88	ENST00000215730.12	-0.107637	0.245379	0.351193	0.0906161	-0.554678	-0.201661	0.355169	0.178756	0.355169	0.178756	0.752562	[-0.16,0.88]	chr22	48	1	4259	777	104	3378	SNAP29	TGA	TGAA
89	ENST00000215754.8	-0.0302111	-0.0557906	-0.0259058	0.849563	2.77247	2.74689	-0.0254946	0.669137	-0.0259058	0.849563	0.988946	[-0.37,0.28]	chr22	90	1	557	348	92	117	MIF	TAA	TAAG
90	ENST00000215770.6	0.0633061	-0.235804	-0.30149	0.207582	2.72548	2.42637	-0.298855	0.10328	-0.30149	0.207582	0.770804	[-0.81,0.17]	chr22	92	1	1582	405	27	1150	DDTL	TGA	TGAG
91	ENST00000215793.13	-0.00138307	0.139203	0.140215	0.181109	0.76409	0.904676	0.140763	0.197295	0.140763	0.197295	0.761733	[-0.07,0.36]	chr22	151	-1	5090	2382	102	2606	SF3A1	TAG	TAGA
92	ENST00000215882.10	-0.0291828	0.131685	0.159993	0.259837	0.281818	0.442686	0.161323	0.31959	0.161323	0.31959	0.853516	[-0.16,0.48]	chr22	22	-1	1548	936	63	549	SLC25A1	TAA	TAAG
93	ENST00000215956.10	0.0346627	0.0509108	0.0157072	0.889107	1.04939	1.06564	0.0164321	0.883123	0.0157072	0.889107	0.989347	[-0.2,0.23]	chr22	294	-1	877	387	264	226	SNU13	TAA	TAAA
94	ENST00000215957.10	-0.0480924	0.141111	0.187589	0.364705	-1.40511	-1.21591	0.191106	0.495746	0.191106	0.495746	0.923469	[-0.36,0.75]	chr22	235	1	4710	2592	126	1992	MICALL1	TAA	TAAC
95	ENST00000215980.10	-0.0388839	0.0383396	0.0751168	0.730005	1.13487	1.21209	0.0781174	0.708669	0.0751168	0.730005	0.980615	[-0.35,0.48]	chr22	300	-1	938	543	76	319	CENPM	TGA	TGAG
96	ENST00000216034.6	0.0145789	-0.0614725	-0.0766013	0.529536	-0.506225	-0.582277	-0.0756844	0.618649	-0.0756844	0.618649	0.955411	[-0.37,0.22]	chr22	251	1	2031	429	22	1580	TOMM22	TAG	TAGA
97	ENST00000216038.6	0.108332	-0.143515	-0.252481	0.0172864	0.610889	0.359042	-0.251558	0.0314126	-0.251558	0.0314126	0.360497	[-0.48,-0.02]	chr22	183	-1	2019	1518	91	410	RTCB	TAG	TAGA
98	ENST00000216044.10	-0.074316	-0.14921	-0.0762081	0.647207	-0.222771	-0.297665	-0.0742907	0.715048	-0.0742907	0.715048	0.978062	[-0.47,0.32]	chr22	253	1	4905	2010	12	2883	GTPBP1	TGA	TGAA
99	ENST00000216106.6	-0.107636	-0.182972	-0.0771943	0.736566	-0.937409	-1.01274	-0.0735734	0.805827	-0.0735734	0.805827	0.988758	[-0.66,0.51]	chr22	190	1	4095	1806	133	2156	HMGXB4	TGA	TGAC
100	ENST00000216117.9	-0.067153	-0.015097	0.0490266	0.851926	0.682744	0.7348	0.053887	0.84371	0.0490266	0.851926	0.988946	[-0.45,0.54]	chr22	192	1	1554	867	78	609	HMOX1	TGA	TGAA
101	ENST00000216121.11	-0.0246483	0.0381255	0.0619071	0.662868	-0.479429	-0.416656	0.0633856	0.720794	0.0633856	0.720794	0.978285	[-0.29,0.42]	chr22	139	-1	2237	855	255	1127	NIPSNAP1	TGA	TGAT
102	ENST00000216122.9	-0.0781669	-0.189587	-0.112021	0.285234	0.917186	0.805766	-0.11119	0.305595	-0.11119	0.305595	0.850015	[-0.32,0.1]	chr22	193	1	3458	2205	77	1176	MCM5	TGA	TGAG
103	ENST00000216129.7	-0.0383872	0.310062	0.347714	0.0027382	-0.152813	0.195637	0.348883	0.00755447	0.348883	0.00755447	0.171302	[0.09,0.61]	chr22	320	-1	3386	1935	65	1386	TTLL12	TAG	TAGG
104	ENST00000216146.9	0.0273832	-0.0602253	-0.0877644	0.180822	-1.09926	-1.18687	-0.0875938	0.268734	-0.0875938	0.268734	0.817088	[-0.24,0.07]	chr22	263	-1	1296	1212	26	58	RPL3	TAA	TAAT
105	ENST00000216181.10	-0.015417	-0.327079	-0.31198	0.00124539	0.913319	0.601657	-0.311477	0.00170444	-0.311477	0.00170444	0.0678709	[-0.51,-0.12]	chr22	202	-1	7554	5883	280	1391	MYH9	TAA	TAAG
106	ENST00000216218.8	-0.00352881	-0.0977005	-0.0946489	0.389201	-1.59154	-1.68571	-0.0938933	0.520445	-0.0938933	0.520445	0.927676	[-0.38,0.19]	chr22	276	-1	3212	1110	99	2003	ST13	TAA	TAAT
107	ENST00000216225.8	0.0277882	-0.297772	-0.326341	0.0095504	1.13366	0.808096	-0.325403	0.0154205	-0.325403	0.0154205	0.253994	[-0.59,-0.06]	chr22	279	1	1188	327	40	821	RBX1	TAG	TAGG
108	ENST00000216237.10	0.0935869	-0.0753451	-0.170109	0.300467	-0.404913	-0.573845	-0.16836	0.418367	-0.16836	0.418367	0.904503	[-0.57,0.24]	chr22	281	1	3189	2118	51	1020	L3MBTL2	TGA	TGAG
109	ENST00000216252.4	-0.0490033	-0.15545	-0.107715	0.533846	-0.350585	-0.457031	-0.105906	0.62577	-0.105906	0.62577	0.956441	[-0.53,0.32]	chr22	287	-1	1053	333	39	681	PHF5A	TGA	TGAT
110	ENST00000216254.9	-0.142065	-0.23086	-0.0896467	0.547051	0.371625	0.28283	-0.0882845	0.606916	-0.0882845	0.606916	0.953842	[-0.42,0.25]	chr22	288	1	2734	2343	30	361	ACO2	TGA	TGAG
111	ENST00000216277.12	-0.00525595	0.198504	0.203375	0.066915	-1.5633	-1.35954	0.20442	0.160084	0.20442	0.160084	0.731146	[-0.08,0.49]	chr14	479	1	4519	2238	220	2061	PAPOLA	TAA	TAAA
112	ENST00000216281.12	0.136831	-0.019428	-0.15642	0.00973967	0.772331	0.616073	-0.156257	0.0056187	-0.15642	0.00973967	0.203644	[-0.28,-0.04]	chr14	502	-1	3379	2199	206	974	HSP90AA1	TAA	TAAT
113	ENST00000216286.10	0.0548222	-0.265037	-0.322632	0.152911	0.790608	0.470749	-0.3192	0.199234	-0.3192	0.199234	0.764993	[-0.8,0.17]	chr14	211	-1	4870	4128	65	677	NID2	TAA	TAAG
114	ENST00000216297.7	0.0189476	-0.17241	-0.191763	0.0296465	0.130941	-0.0604168	-0.191328	0.0552986	-0.191328	0.0552986	0.487123	[-0.39,0]	chr14	47	-1	4433	3144	92	1197	SUPT16H	TAA	TAAC
115	ENST00000216330.7	0.088615	-0.0816205	-0.170681	0.131059	0.588475	0.418239	-0.169832	0.18473	-0.169832	0.18473	0.752562	[-0.42,0.08]	chr14	181	-1	1684	675	411	598	FKBP3	TGA	TGAA
116	ENST00000216367.10	0.0112428	0.084482	0.0710733	0.765495	0.252174	0.325413	0.0747478	0.791183	0.0747478	0.791183	0.987349	[-0.49,0.64]	chr14	190	-1	1692	1584	11	97	POLE2	TGA	TGAG
117	ENST00000216416.9	-0.0286718	0.393198	0.421274	0.00138729	-0.565966	-0.144096	0.422741	0.0111708	0.422741	0.0111708	0.213843	[0.1,0.75]	chr14	224	-1	4735	435	47	4253	CNIH1	TAG	TAGA
118	ENST00000216442.12	0.0522813	0.0347079	-0.0189339	0.914405	-0.324253	-0.341827	-0.0166979	0.943172	-0.0166979	0.943172	0.995968	[-0.46,0.43]	chr14	298	-1	1599	744	106	749	ATP6V1D	TAA	TAAT
119	ENST00000216455.9	-0.0714313	-0.10892	-0.0380286	0.713663	0.957164	0.919676	-0.0372973	0.731767	-0.0372973	0.731767	0.980615	[-0.25,0.18]	chr14	247	1	955	768	78	109	PSMA3	TAA	TAAC
120	ENST00000216479.8	-0.0350192	0.0766482	0.111202	0.249032	0.109729	0.221397	0.112032	0.320042	0.112032	0.320042	0.853516	[-0.11,0.33]	chr14	397	1	1337	1017	97	223	AHSA1	TAG	TAGG
121	ENST00000216484.6	-0.0695371	0.00378126	0.0719763	0.680952	-0.877661	-0.804343	0.0743612	0.744997	0.0743612	0.744997	0.982424	[-0.38,0.53]	chr14	399	-1	8170	1689	194	6287	SPTLC2	TGA	TGAG
122	ENST00000216500.9	0.0482906	0.0436632	-0.00630757	0.967784	0.689945	0.685318	-0.00368407	0.986461	-0.00368407	0.986461	0.999541	[-0.4,0.39]	chr14	261	-1	2322	1020	456	846	DHRS7	TGA	TGAA
123	ENST00000216639.8	0.116018	-0.260261	-0.377666	0.0136273	0.323387	-0.0528924	-0.375903	0.035517	-0.375903	0.035517	0.393783	[-0.73,-0.03]	chr14	480	1	1663	1191	71	401	VRK1	TAA	TAAT
124	ENST00000216756.11	0.00454742	-0.592007	-0.599715	0.0113671	0.489226	-0.107329	-0.596218	0.0284005	-0.596218	0.0284005	0.344073	[-1.13,-0.06]	chr14	506	-1	953	639	39	275	CINP	TGA	TGAC
125	ENST00000216774.11	0.0400724	-0.0755985	-0.116723	0.408548	0.750153	0.634482	-0.115326	0.458417	-0.115326	0.458417	0.922714	[-0.42,0.19]	chr14	149	1	2187	1515	257	415	SRP54	TAA	TAAA
126	ENST00000216780.8	-0.254959	-0.429993	-0.179276	0.507381	1.08856	0.913529	-0.174693	0.535134	-0.174693	0.535134	0.933437	[-0.72,0.38]	chr14	97	1	2357	1923	268	166	PCK2	TGA	TGAC
127	ENST00000216802.10	0.102899	-0.366728	-0.472206	0.0217687	0.967281	0.497654	-0.468987	0.0362695	-0.468987	0.0362695	0.399994	[-0.91,-0.03]	chr14	102	-1	793	720	29	44	PSME2	TGA	TGAA
128	ENST00000216807.12	-0.0273969	0.264858	0.29002	0.218817	-0.379516	-0.0872613	0.294637	0.318268	0.294637	0.318268	0.852891	[-0.29,0.88]	chr14	157	1	2637	972	179	1486	BRMS1L	TAA	TAAT
129	ENST00000216832.9	0.0124449	-0.152136	-0.165217	0.179848	-0.975412	-1.13999	-0.164344	0.30274	-0.164344	0.30274	0.849297	[-0.48,0.15]	chr14	172	1	3537	2154	26	1357	PNN	TAA	TAAT
130	ENST00000216879.8	0.0980681	-0.0928078	-0.193166	0.327472	0.308588	0.117712	-0.189778	0.413899	-0.189778	0.413899	0.903834	[-0.64,0.27]	chr20	23	-1	3568	1113	868	1587	NSFL1C	TAA	TAAC
131	ENST00000216962.9	0.0203672	-0.14381	-0.165696	0.371792	0.38857	0.224393	-0.163428	0.450195	-0.163428	0.450195	0.917292	[-0.59,0.26]	chr20	150	1	4116	2532	94	1490	PYGB	TAG	TAGG
132	ENST00000217026.5	-0.0344772	0.471476	0.505543	0.000136407	-2.37538	-1.86943	0.50697	0.00754987	0.50697	0.00754987	0.171302	[0.13,0.88]	chr20	274	1	2668	2103	170	395	MYBL2	TGA	TGAG
133	ENST00000217109.8	0.0872516	-0.198886	-0.287758	0.115761	-0.0149978	-0.301135	-0.285379	0.199643	-0.285379	0.199643	0.764993	[-0.72,0.15]	chr20	384	1	4290	1296	352	2642	CSTF1	TGA	TGAG
134	ENST00000217182.6	-0.0408949	-0.292132	-0.252822	0.125557	1.50502	1.25379	-0.250865	0.10494	-0.252822	0.125557	0.671644	[-0.59,0.07]	chr20	449	-1	1773	1392	97	284	EEF1A2	TGA	TGAA
135	ENST00000217402.3	-0.170415	0.171973	0.340713	0.0750601	0.148559	0.490947	0.34355	0.121562	0.34355	0.121562	0.663607	[-0.09,0.78]	chr20	196	1	1602	675	121	806	CHMP4B	TAA	TAAT
136	ENST00000217426.7	1.19867e-06	-0.321634	-0.322043	0.00048919	0.390457	0.0688221	-0.321541	0.00186693	-0.321541	0.00186693	0.0710719	[-0.52,-0.12]	chr20	200	-1	2150	1299	85	766	AHCY	TGA	TGAG
137	ENST00000217456.3	0.0858516	-0.159303	-0.246244	0.145732	0.0142009	-0.230954	-0.24436	0.236435	-0.24436	0.236435	0.801392	[-0.65,0.16]	chr20	146	-1	2202	1251	63	888	APMAP	TAG	TAGC
138	ENST00000217901.10	0.0242194	-0.0955163	-0.120903	0.449588	1.03466	0.914928	-0.119172	0.485219	-0.119172	0.485219	0.922714	[-0.45,0.22]	chrX	723	-1	1335	1182	49	104	IDH3G	TAG	TAGG
139	ENST00000217958.8	0.0308484	-0.0396522	-0.071304	0.597594	0.050464	-0.0200367	-0.0701136	0.661996	-0.0701136	0.661996	0.967547	[-0.38,0.24]	chrX	487	-1	1470	681	22	767	PSMD10	TAA	TAAA
140	ENST00000217971.8	0.0869608	-0.129719	-0.217016	0.0104632	-0.0103401	-0.22702	-0.216556	0.0302825	-0.216556	0.0302825	0.354638	[-0.41,-0.02]	chrX	525	1	1879	588	79	1212	PGRMC1	TAA	TAAA
141	ENST00000218104.6	-0.0186993	0.0042192	0.0203714	0.932268	0.480823	0.503741	0.024181	0.919771	0.0203714	0.932268	0.995269	[-0.43,0.46]	chrX	721	1	3669	2238	411	1020	ABCD1	TGA	TGAC
142	ENST00000218147.11	-0.0663128	-0.0140331	0.049745	0.844687	1.42679	1.47907	0.0530542	0.809526	0.049745	0.844687	0.988946	[-0.43,0.51]	chrX	579	1	6860	5136	197	1527	BCORL1	TGA	TGAC
143	ENST00000218230.6	0.295578	0.654453	0.353922	0.421157	2.394	2.75288	0.36229	0.240877	0.353922	0.421157	0.90452	[-0.51,1.11]	chrX	206	-1	1025	783	78	164	PCSK1N	TGA	TGAG
144	ENST00000218340.4	-0.0218722	0.0160206	0.0350233	0.882723	-0.0261662	0.0117264	0.0396637	0.886528	0.0396637	0.886528	0.989347	[-0.52,0.61]	chrX	169	1	3700	1053	58	2589	RP2	TGA	TGAA
145	ENST00000218348.7	-0.0872721	-0.264116	-0.177977	0.219157	1.32174	1.1449	-0.17665	0.215797	-0.177977	0.219157	0.780814	[-0.47,0.11]	chrX	176	1	3338	2892	49	397	USP11	TGA	TGAG
146	ENST00000218388.9	0.000584355	0.0112554	0.00811682	0.98158	1.34317	1.35384	0.0119047	0.955942	0.00811682	0.98158	0.999541	[-0.46,0.46]	chrX	181	1	769	624	47	98	TIMP1	TGA	TGAA
147	ENST00000218439.8	0.158566	-0.154032	-0.313403	0.0175105	1.35212	1.03952	-0.312225	0.0184322	-0.312225	0.0184322	0.278552	[-0.57,-0.05]	chrX	275	1	1958	1821	125	12	MAGED2	TGA	TGAG
148	ENST00000218516.3	0.113198	-0.171084	-0.28465	0.00190989	1.08043	0.796145	-0.284193	0.00351935	-0.284193	0.00351935	0.106021	[-0.47,-0.09]	chrX	425	-1	1318	1290	22	6	GLA	TAA	TAAA
149	ENST00000219066.5	0.0253404	0.104854	0.0775033	0.700314	1.34188	1.42139	0.0804629	0.66569	0.0775033	0.700314	0.977022	[-0.31,0.46]	chr16	86	-1	1067	939	19	109	NTHL1	TGA	TGAT
150	ENST00000219097.7	0.0283377	0.000483833	-0.0296212	0.873745	-0.00464628	-0.0325003	-0.0266647	0.908098	-0.0266647	0.908098	0.989683	[-0.47,0.42]	chr16	431	1	1615	759	47	809	ORC6	TGA	TGAT
151	ENST00000219252.10	-0.0543814	0.0514566	0.104835	0.449756	0.092488	0.198326	0.106368	0.514018	0.106368	0.514018	0.927676	[-0.21,0.43]	chr16	502	1	1764	828	46	890	POLR2C	TAA	TAAC
152	ENST00000219302.7	0.200461	-0.166106	-0.370549	0.16059	1.6516	1.28503	-0.365637	0.144305	-0.370549	0.16059	0.731683	[-0.92,0.15]	chr16	64	-1	1069	510	196	363	NME3	TAG	TAGC
153	ENST00000219313.9	0.0574925	0.224883	0.166784	0.177775	-0.130059	0.037331	0.168041	0.26027	0.168041	0.26027	0.810325	[-0.12,0.46]	chr16	644	1	1631	975	101	555	PSMD7	TAA	TAAA
154	ENST00000219343.11	-0.0900789	0.270618	0.359686	0.0476295	-1.56551	-1.20481	0.362285	0.148734	0.362285	0.148734	0.713143	[-0.13,0.86]	chr16	592	1	6255	1548	216	4491	SLC7A6	TAG	TAGA
155	ENST00000219431.4	0.0192077	0.24713	0.225487	0.318951	0.670746	0.898669	0.229642	0.335484	0.229642	0.335484	0.854469	[-0.24,0.7]	chr16	2	1	1193	897	231	65	MPG	TGA	TGAG
156	ENST00000219473.11	0.0148675	0.155713	0.140232	0.298379	-1.06119	-0.920348	0.141491	0.425466	0.141491	0.425466	0.906179	[-0.21,0.49]	chr16	702	1	3009	2397	113	499	USP10	TAA	TAAA
157	ENST00000219476.9	-0.0111297	-0.00813148	0.00190169	0.992011	0.255161	0.258159	0.00360306	0.981242	0.00190169	0.992011	0.999541	[-0.31,0.31]	chr16	87	1	6415	5424	110	881	TSC2	TGA	TGAG
158	ENST00000219479.7	0.0880093	0.437148	0.348117	0.0564682	-1.54107	-1.19193	0.351034	0.163107	0.351034	0.163107	0.737282	[-0.14,0.85]	chr16	15	1	1000	564	24	412	NME4	TGA	TGAG
159	ENST00000219548.9	0.00390718	0.646527	0.64153	6.27692e-06	-0.397509	0.245111	0.64367	0.000144822	0.64367	0.000144822	0.0108711	[0.31,0.98]	chr16	27	1	1340	912	116	312	STUB1	TGA	TGAG
160	ENST00000219797.9	-0.0364407	0.106965	0.140546	0.54746	0.370906	0.514311	0.144999	0.582701	0.144999	0.582701	0.948521	[-0.37,0.67]	chr16	404	1	1495	1377	18	100	KAT8	TGA	TGAG
161	ENST00000219837.12	0.0357436	0.215913	0.179141	0.362277	-1.58024	-1.40007	0.182289	0.502945	0.182289	0.502945	0.923469	[-0.35,0.73]	chr16	249	-1	6422	1377	72	4973	KNOP1	TAA	TAAA
162	ENST00000220166.9	-0.101768	0.180456	0.279458	0.226074	0.560366	0.84259	0.284068	0.261325	0.284068	0.261325	0.810709	[-0.21,0.79]	chr15	407	-1	2190	1008	110	1072	CTSH	TGA	TGAG
163	ENST00000220325.9	0.0382878	-0.0248057	-0.0653204	0.75294	0.208412	0.145318	-0.0617339	0.80427	-0.0617339	0.80427	0.988428	[-0.54,0.43]	chr15	109	-1	6401	1626	63	4712	EHD4	TGA	TGAG
164	ENST00000220514.8	-0.00450205	0.205842	0.207586	0.438485	0.388621	0.598965	0.213111	0.492285	0.213111	0.492285	0.923469	[-0.4,0.83]	chr15	98	-1	1201	690	30	481	OIP5	TGA	TGAT
165	ENST00000220584.9	-0.0233379	-0.0237362	-0.00104026	0.98945	0.745281	0.744882	0	0.999535	0	0.999535	0.999541	[-0.24,0.24]	chr8	57	1	2035	1254	92	689	FDFT1	TGA	TGAT
166	ENST00000220592.10	-0.0196394	0.0982857	0.117058	0.502217	-1.81961	-1.70168	0.119199	0.620624	0.119199	0.620624	0.956441	[-0.36,0.6]	chr8	528	-1	14595	2580	127	11888	AGO2	TGA	TGAC
167	ENST00000220849.9	0.0752399	-0.0495948	-0.125127	0.106367	-0.204407	-0.329242	-0.12474	0.175337	-0.12474	0.175337	0.752267	[-0.3,0.06]	chr8	449	-1	1543	1338	63	142	EIF3E	TGA	TGAA
168	ENST00000220853.8	0.0458242	0.338158	0.290634	0.160107	0.0180482	0.310382	0.294057	0.235301	0.294057	0.235301	0.801392	[-0.19,0.79]	chr8	450	1	3527	894	35	2598	EMC2	TAA	TAAG
169	ENST00000220966.10	0.0424319	-0.109101	-0.153965	0.44519	0.616493	0.46496	-0.150542	0.492508	-0.150542	0.492508	0.923469	[-0.58,0.28]	chr8	562	-1	2678	861	30	1787	PYCR3	TAG	TAGG
170	ENST00000221130.11	-0.0978106	0.131173	0.228393	0.0883646	-0.718549	-0.489566	0.229675	0.179306	0.229675	0.179306	0.752562	[-0.11,0.57]	chr8	169	-1	3034	1569	11	1454	GSR	TGA	TGAG
171	ENST00000221166.10	-0.149725	-0.173693	-0.0246678	0.82263	0.794397	0.770429	-0.0237573	0.830505	-0.0237573	0.830505	0.988946	[-0.24,0.19]	chr8	128	1	3271	2751	33	487	NEFM	TAA	TAAG
172	ENST00000221233.9	0.102873	-0.155299	-0.260522	0.203322	1.4872	1.22903	-0.257708	0.197023	-0.260522	0.203322	0.767241	[-0.68,0.14]	chr19	774	-1	998	708	31	259	EXOSC5	TGA	TGAG
173	ENST00000221283.10	-0.0173507	0.0800352	0.093124	0.755064	1.26331	1.36069	0.0991312	0.718146	0.093124	0.755064	0.984754	[-0.48,0.64]	chr19	209	1	1885	1782	40	63	STXBP2	TGA	TGAC
174	ENST00000221418.9	0.0127027	-0.110093	-0.124694	0.517948	1.53693	1.41414	-0.122047	0.513012	-0.124694	0.517948	0.927676	[-0.52,0.26]	chr19	702	-1	1200	987	22	191	ECH1	TGA	TGAG
175	ENST00000221419.9	-0.0142431	-0.0309775	-0.0169774	0.813051	0.772704	0.755969	-0.016654	0.82866	-0.016654	0.82866	0.988946	[-0.17,0.13]	chr19	703	-1	2471	1770	367	334	HNRNPL	TAA	TAAT
176	ENST00000221486.5	-0.0361941	-0.0205298	0.0147782	0.914214	0.841988	0.857652	0.0160799	0.907819	0.0147782	0.914214	0.991283	[-0.25,0.27]	chr19	349	1	2753	900	118	1735	RNASEH2A	TAG	TAGC
177	ENST00000221494.10	-0.0464631	0.183909	0.229179	0.293187	2.34688	2.57726	0.230915	0.146682	0.229179	0.293187	0.8424	[-0.2,0.63]	chr19	71	1	1619	1395	115	109	SF3A2	TGA	TGAG
178	ENST00000221566.7	0.0245833	-0.136746	-0.162368	0.258557	0.236754	0.0754251	-0.160988	0.328749	-0.160988	0.328749	0.853516	[-0.48,0.16]	chr19	86	-1	2231	942	64	1225	SGTA	TGA	TGAC
179	ENST00000221801.8	-0.159017	-0.0330657	0.125656	0.17584	1.14798	1.27393	0.126082	0.161712	0.125656	0.17584	0.752267	[-0.06,0.31]	chr19	737	-1	1125	966	79	80	FBL	TGA	TGAA
180	ENST00000221855.8	-0.163638	-0.246447	-0.0841143	0.615475	0.561958	0.479149	-0.0822382	0.664174	-0.0822382	0.664174	0.968262	[-0.45,0.29]	chr19	648	1	987	735	93	159	TBCB	TGA	TGAC
181	ENST00000221859.9	-0.18087	0.0124918	0.190766	0.383428	0.55049	0.743852	0.194668	0.414407	0.194668	0.414407	0.903915	[-0.27,0.67]	chr19	647	-1	443	378	19	46	POLR2I	TGA	TGAC
182	ENST00000221943.13	-0.121523	-0.194929	-0.0765432	0.752478	0.267208	0.193801	-0.07208	0.802914	-0.07208	0.802914	0.988052	[-0.63,0.49]	chr19	777	-1	1692	774	6	912	DMAC2	TAG	TAGC
183	ENST00000221957.9	0.0312523	0.0111894	-0.0225925	0.910627	1.05593	1.03587	-0.0187941	0.933665	-0.0187941	0.933665	0.995402	[-0.46,0.42]	chr19	148	-1	2232	1305	76	851	PLIN3	TAG	TAGG
184	ENST00000222005.7	-0.0745451	0.0685054	0.142706	0.144358	0.175241	0.318292	0.143442	0.200901	0.143442	0.200901	0.766605	[-0.08,0.36]	chr19	280	-1	1618	1137	63	418	CDC37	TGA	TGAC
185	ENST00000222008.11	0.0597427	-0.242833	-0.304144	0.116132	2.43966	2.13708	-0.30216	0.0531673	-0.304144	0.116132	0.648497	[-0.7,0.08]	chr19	791	-1	750	558	29	163	RABAC1	TGA	TGAG
186	ENST00000222219.8	-0.248673	0.0688105	0.314826	0.179308	0.588979	0.906463	0.318753	0.207202	0.318753	0.207202	0.770737	[-0.18,0.82]	chr19	352	-1	1938	1083	74	781	DNASE2	TAA	TAAC
187	ENST00000222247.10	-0.00988992	0.0387991	0.0478628	0.704552	-0.963802	-0.915113	0.0489686	0.616138	0.0478628	0.704552	0.977022	[-0.2,0.28]	chr19	470	1	634	531	47	56	RPL18A	TAG	TAGG
188	ENST00000222266.2	-0.0249127	-0.178133	-0.155794	0.490358	0.62396	0.470739	-0.152476	0.553722	-0.152476	0.553722	0.93958	[-0.65,0.35]	chr19	627	1	603	306	140	157	PSENEN	TGA	TGAC
189	ENST00000222284.10	-0.0947232	0.814145	0.907726	1.12808e-07	-0.755917	0.152951	0.911239	4.7234e-05	0.911239	4.7234e-05	0.00470184	[0.47,1.36]	chr19	616	1	868	675	114	79	TMEM147	TAG	TAGG
190	ENST00000222329.9	-0.119246	0.154409	0.270305	0.291547	0.118684	0.392339	0.275699	0.354022	0.275699	0.354022	0.864568	[-0.31,0.87]	chr19	799	-1	2672	1647	129	896	ERF	TGA	TGAG
191	ENST00000222330.8	-0.12993	0.485511	0.613548	0.00212462	-0.18516	0.430281	0.617255	0.0109673	0.617255	0.0109673	0.213843	[0.14,1.1]	chr19	798	-1	2193	1452	137	604	GSK3A	TGA	TGAG
192	ENST00000222399.11	-0.0176832	0.00821288	0.0246689	0.872213	0.61667	0.642566	0.0264717	0.86728	0.0246689	0.872213	0.989347	[-0.27,0.32]	chr7	554	-1	5650	5361	137	152	LAMB1	TAA	TAAC
193	ENST00000222511.10	0.0404443	-0.177043	-0.219666	0.29498	-0.541094	-0.758581	-0.216651	0.417371	-0.216651	0.417371	0.904503	[-0.74,0.31]	chr7	374	1	7531	1164	66	6301	GTPBP10	TAA	TAAA
194	ENST00000222553.8	-0.0573281	-0.0340659	0.0225595	0.874842	-0.87183	-0.848568	0.024075	0.896232	0.024075	0.896232	0.989629	[-0.34,0.39]	chr7	541	-1	4360	1476	99	2785	NAMPT	TAG	TAGG
195	ENST00000222567.6	0.0370151	-0.0376111	-0.0756195	0.675565	-0.964387	-1.03901	-0.0733246	0.758169	-0.0733246	0.758169	0.984754	[-0.54,0.39]	chr7	96	-1	3893	1017	21	2855	TWISTNB	TAG	TAGT
196	ENST00000222673.6	0.0339905	0.332729	0.296946	0.12028	0.14902	0.447759	0.300469	0.178002	0.300469	0.178002	0.752562	[-0.14,0.74]	chr7	215	1	4193	3072	54	1067	OGDH	TAG	TAGA
197	ENST00000222690.10	-0.093536	0.290689	0.38355	0.00528105	-0.921617	-0.537392	0.384987	0.0298622	0.384987	0.0298622	0.352278	[0.04,0.74]	chr7	218	-1	3804	345	106	3353	H2AFV	TAG	TAGA
198	ENST00000222969.10	0.0347732	-0.227744	-0.264466	0.221175	-0.161776	-0.424294	-0.261321	0.327443	-0.261321	0.327443	0.853516	[-0.78,0.26]	chr7	430	1	1052	435	442	175	BUD31	TGA	TGAG
199	ENST00000223023.5	-0.110055	-0.00253106	0.105319	0.651647	-0.782967	-0.675443	0.109624	0.720203	0.109624	0.720203	0.978285	[-0.49,0.72]	chr7	602	-1	4363	1518	269	2576	WASL	TGA	TGAT
200	ENST00000223029.8	-0.00675386	0.0572615	0.063125	0.659303	1.20503	1.26904	0.0643075	0.647232	0.063125	0.659303	0.966293	[-0.22,0.34]	chr7	48	1	1198	963	92	143	AIMP2	TGA	TGAA
201	ENST00000223073.6	-0.00949346	-0.206084	-0.197679	0.230523	-0.147236	-0.343826	-0.196108	0.334248	-0.196108	0.334248	0.854469	[-0.59,0.2]	chr7	618	-1	15507	2280	115	13112	RBM28	TGA	TGAT
202	ENST00000223127.8	-0.131509	-0.211367	-0.0823019	0.699654	1.11649	1.03664	-0.0790616	0.724305	-0.0790616	0.724305	0.979015	[-0.52,0.36]	chr7	498	-1	2821	2217	307	297	PLOD3	TGA	TGAC
203	ENST00000223136.4	-0.0718677	0.140657	0.210568	0.315504	-0.497522	-0.284997	0.214354	0.419138	0.214354	0.419138	0.904503	[-0.31,0.74]	chr7	501	-1	734	459	81	194	FIS1	TGA	TGAA
204	ENST00000223321.9	0.0845714	-0.0827077	-0.16762	0.0847018	0.919453	0.752174	-0.167147	0.103441	-0.167147	0.103441	0.630121	[-0.37,0.03]	chr7	194	-1	1434	705	16	713	PSMA2	TAA	TAAC
205	ENST00000223324.3	0.135743	-0.0657773	-0.202954	0.230506	0.264042	0.0625217	-0.200729	0.318374	-0.200729	0.318374	0.852891	[-0.59,0.19]	chr7	195	1	859	567	11	281	MRPL32	TGA	TGAC
206	ENST00000223369.3	0.00153625	0.634401	0.632071	0.00110692	-2.17544	-1.54257	0.635573	0.0254403	0.635573	0.0254403	0.325349	[0.08,1.21]	chr7	209	1	2767	597	158	2012	YKT6	TGA	TGAT
207	ENST00000223500.9	0.0159672	-0.259961	-0.277191	0.0860438	0.132603	-0.143326	-0.275297	0.151221	-0.275297	0.151221	0.7165	[-0.65,0.1]	chr9	115	1	1901	660	30	1211	CHMP5	TAG	TAGA
208	ENST00000223641.5	0.0916513	-0.523077	-0.615759	1.31741e-05	0.822063	0.207335	-0.614614	7.93962e-05	-0.614614	7.93962e-05	0.00712853	[-0.92,-0.31]	chr9	353	1	564	291	82	191	SEC61B	TAG	TAGA
209	ENST00000224073.6	0.0349461	0.0967002	0.0606747	0.66843	0.180891	0.242646	0.062256	0.696458	0.062256	0.696458	0.97527	[-0.25,0.38]	chr9	658	-1	662	447	50	165	EDF1	TGA	TGAA
210	ENST00000224140.6	0.0743303	0.201183	0.125859	0.437869	-1.18137	-1.05452	0.128184	0.556102	0.128184	0.556102	0.939627	[-0.3,0.56]	chr9	582	-1	11101	8034	184	2883	SETX	TAG	TAGG
211	ENST00000224237.9	0.0590893	-0.141587	-0.200795	0.00604619	1.24347	1.0428	-0.200615	0.0069518	-0.200615	0.0069518	0.165648	[-0.35,-0.05]	chr10	76	1	1868	1401	145	322	VIM	TAA	TAAA
212	ENST00000225174.8	0.017866	-0.0335635	-0.0519012	0.64803	0.214812	0.163383	-0.0510457	0.702672	-0.0510457	0.702672	0.977022	[-0.31,0.21]	chr10	332	1	2196	624	80	1492	PPIF	TAA	TAAT
213	ENST00000225296.8	-0.0453182	0.29716	0.341374	0.0430186	-0.353244	-0.0107665	0.343552	0.102552	0.343552	0.102552	0.627789	[-0.07,0.76]	chr17	102	-1	5535	2124	123	3288	DHX33	TGA	TGAG
214	ENST00000225298.12	0.168649	0.164009	-0.00544797	0.966681	0.292893	0.288254	-0.00380502	0.982264	-0.00380502	0.982264	0.999541	[-0.33,0.33]	chr17	749	1	1876	1671	39	166	UTP18	TAA	TAAA
215	ENST00000225388.9	0.0837391	0.0285499	-0.0555644	0.677967	-2.02117	-2.07636	-0.054345	0.769403	-0.054345	0.769403	0.985535	[-0.42,0.31]	chr17	339	-1	10877	2088	89	8700	NUFIP2	TGA	TGAA
216	ENST00000225430.9	0.0591723	-0.191525	-0.250931	0.000131175	-0.592705	-0.843402	-0.25061	0.000878291	-0.25061	0.000878291	0.0420714	[-0.4,-0.1]	chr17	459	1	737	591	62	84	RPL19	TAA	TAAA
217	ENST00000225603.9	-0.0375986	0.0601939	0.0971398	0.522285	-1.24756	-1.14977	0.0986635	0.626236	0.0986635	0.626236	0.956441	[-0.3,0.5]	chr17	689	-1	2182	558	248	1376	CBX1	TAA	TAAC
218	ENST00000225655.5	-0.242912	-0.143032	0.0996229	0.193543	0.754526	0.854405	0.0999629	0.201189	0.0999629	0.201189	0.7668	[-0.05,0.25]	chr17	86	-1	1291	423	620	248	PFN1	TGA	TGAC
219	ENST00000225665.12	-0.095139	0.0285402	0.122773	0.354125	0.0298395	0.153519	0.124046	0.425805	0.124046	0.425805	0.906179	[-0.18,0.43]	chr17	84	-1	1692	945	136	611	SLC25A11	TGA	TGAA
220	ENST00000225698.8	0.000785035	-0.0981399	-0.0990572	0.138326	0.959469	0.860544	-0.0988873	0.155	-0.0988873	0.155	0.722618	[-0.24,0.04]	chr17	101	-1	1169	849	82	238	C1QBP	TAG	TAGA
221	ENST00000225719.9	0.0581488	-0.00831371	-0.0670819	0.553321	-0.0729566	-0.139419	-0.0662422	0.627044	-0.0662422	0.627044	0.956441	[-0.33,0.2]	chr17	352	1	9372	4143	54	5175	CPD	TGA	TGAA
222	ENST00000225729.8	0.0371707	0.195229	0.155901	0.450707	0.402115	0.560173	0.159686	0.490154	0.159686	0.490154	0.922714	[-0.29,0.62]	chr17	262	1	1900	1095	76	729	DRG2	TAA	TAAC
223	ENST00000225792.9	0.0662719	-0.0276205	-0.0940204	0.206791	0.705083	0.61119	-0.0937571	0.24337	-0.0937571	0.24337	0.80644	[-0.25,0.06]	chr17	845	-1	2554	1845	402	307	DDX5	TAA	TAAG
224	ENST00000225916.10	-0.149757	0.0500376	0.198251	0.284717	-0.207875	-0.00807999	0.200732	0.379628	0.200732	0.379628	0.88012	[-0.25,0.65]	chr17	566	-1	3115	2514	63	538	KAT2A	TAG	TAGG
225	ENST00000225927.7	-0.0085894	0.407561	0.413294	0.0870838	0.689321	1.10547	0.418389	0.100353	0.418389	0.100353	0.616913	[-0.08,0.92]	chr17	577	1	2475	2232	32	211	NAGLU	TGA	TGAT
226	ENST00000225969.9	-0.0508725	-0.32501	-0.275479	0.0983332	0.764587	0.49045	-0.273809	0.134953	-0.273809	0.134953	0.687373	[-0.63,0.09]	chr17	731	-1	686	447	14	225	MRPL27	TGA	TGAT
227	ENST00000225972.8	-0.0602175	0.0453952	0.105146	0.252877	-0.383541	-0.277928	0.105998	0.342924	0.105998	0.342924	0.85874	[-0.11,0.33]	chr17	733	-1	2880	924	206	1750	LRRC59	TGA	TGAG
228	ENST00000226004.8	-0.0345897	0.0749159	0.108155	0.586622	-2.03184	-1.92234	0.111389	0.691208	0.111389	0.691208	0.97424	[-0.44,0.67]	chr17	613	-1	4095	558	53	3484	DUSP3	TAG	TAGG
229	ENST00000226230.8	-0.0481499	0.235044	0.282291	0.0798765	-1.17778	-0.894589	0.284687	0.185736	0.284687	0.185736	0.75264	[-0.14,0.71]	chr17	309	1	2463	531	40	1892	TMEM97	TGA	TGAA
230	ENST00000226253.9	-0.170196	-0.601093	-0.436767	0.155845	1.68041	1.24952	-0.43039	0.137939	-0.436767	0.155845	0.723014	[-1.07,0.17]	chr17	320	-1	1608	1095	107	406	ALDOC	TGA	TGAG
231	ENST00000226796.7	-0.103538	0.137433	0.239168	0.242347	1.37613	1.6171	0.242057	0.198184	0.239168	0.242347	0.804957	[-0.16,0.63]	chr4	453	1	1015	654	55	306	GAR1	TAA	TAAG
232	ENST00000227266.10	0.082716	-0.0301744	-0.113975	0.437676	1.24689	1.134	-0.112318	0.453856	-0.112318	0.453856	0.9216	[-0.41,0.18]	chr11	832	-1	1870	1392	64	414	CTSC	TAG	TAGG
233	ENST00000227322.8	-0.0480354	0.186442	0.233623	0.196843	-1.43188	-1.1974	0.23632	0.339694	0.23632	0.339694	0.856058	[-0.25,0.73]	chr11	967	-1	6539	1380	33	5126	ZPR1	TAG	TAGC
234	ENST00000227378.7	0.20483	-0.0736598	-0.278575	1.03023e-06	0.262271	-0.0162189	-0.278489	6.81771e-06	-0.278489	6.81771e-06	0.0012007	[-0.4,-0.16]	chr11	1041	-1	2186	1941	8	237	HSPA8	TAA	TAAG
235	ENST00000227507.2	-0.105498	-0.0291548	0.0740683	0.749881	-0.573899	-0.497556	0.0783982	0.787603	0.0783982	0.787603	0.987263	[-0.5,0.66]	chr11	714	1	4307	888	227	3192	CCND1	TGA	TGAG
236	ENST00000227520.10	0.0144257	-0.232255	-0.247751	0.10915	0.841038	0.594357	-0.246212	0.150803	-0.246212	0.150803	0.716277	[-0.58,0.09]	chr11	478	1	1851	1083	12	756	CCDC86	TGA	TGAG
237	ENST00000227524.9	-0.0781179	0.0253893	0.102977	0.325942	1.25092	1.35442	0.103668	0.309297	0.102977	0.325942	0.853516	[-0.1,0.31]	chr11	480	-1	2337	1515	203	619	PRPF19	TAG	TAGG
238	ENST00000227868.8	0.0469027	0.0766811	0.0283423	0.863695	-0.347505	-0.317727	0.0309137	0.879434	0.0309137	0.879434	0.989347	[-0.38,0.44]	chr11	300	1	2389	1506	84	799	PDHX	TAG	TAGT
239	ENST00000228136.9	0.0443811	-0.0638398	-0.108778	0.324934	-0.668217	-0.776438	-0.107866	0.437405	-0.107866	0.437405	0.90877	[-0.38,0.16]	chr11	215	1	3920	552	132	3236	C11orf58	TAA	TAAC
240	ENST00000228140.6	-0.0017958	-0.250944	-0.24929	0.000599509	0.233271	-0.015878	-0.248996	0.00238427	-0.248996	0.00238427	0.0820971	[-0.41,-0.09]	chr11	217	-1	491	447	25	19	RPS13	TAA	TAAA
241	ENST00000228251.9	-0.0209801	-0.355851	-0.335397	0.00143271	-0.122907	-0.457777	-0.334609	0.0075547	-0.334609	0.0075547	0.171302	[-0.58,-0.09]	chr12	137	-1	1931	1119	212	600	YBX3	TAA	TAAC
242	ENST00000228306.8	-0.0205288	0.00639365	0.0266757	0.70554	-2.04694	-2.02002	0.0271635	0.762124	0.0271635	0.762124	0.985125	[-0.15,0.2]	chr12	831	-1	1257	954	237	66	RPLP0	TAA	TAAT
243	ENST00000228347.9	0.086942	-0.199564	-0.288062	0.115776	0.452493	0.165987	-0.285905	0.175292	-0.285905	0.175292	0.752267	[-0.7,0.13]	chr12	722	1	4183	3402	132	649	POLR3B	TGA	TGAG
244	ENST00000228495.11	-0.134351	-0.332413	-0.200053	0.354159	-0.189215	-0.387278	-0.197356	0.456934	-0.197356	0.456934	0.922714	[-0.72,0.32]	chr12	749	-1	3920	942	38	2940	KCTD10	TGA	TGAG
245	ENST00000228740.7	0.0675516	-0.0971673	-0.165441	0.14823	0.670653	0.505934	-0.164517	0.195874	-0.164517	0.195874	0.758909	[-0.41,0.08]	chr12	668	-1	2140	1836	68	236	LTA4H	TAA	TAAA
246	ENST00000228825.12	-0.0884357	-0.158089	-0.0703135	0.533492	0.127064	0.0574104	-0.0694526	0.600586	-0.0694526	0.600586	0.953842	[-0.33,0.19]	chr12	763	-1	946	537	77	332	ARPC3	TGA	TGAA
247	ENST00000228827.8	-0.0292125	-0.083294	-0.0558546	0.766714	0.186572	0.13249	-0.0530715	0.813572	-0.0530715	0.813572	0.988946	[-0.49,0.39]	chr12	764	-1	1457	855	54	548	GPN3	TGA	TGAA
248	ENST00000229179.9	0.0946868	0.0704903	-0.0248554	0.833924	0.492487	0.46829	-0.0238614	0.861959	-0.0238614	0.861959	0.989181	[-0.29,0.24]	chr12	574	1	6213	2778	88	3347	NUP107	TAG	TAGT
249	ENST00000229195.7	-0.000849895	-0.0654233	-0.0663403	0.732366	-0.698956	-0.763529	-0.0634496	0.799672	-0.0634496	0.799672	0.987569	[-0.55,0.42]	chr12	586	1	3282	1623	582	1077	CNOT2	TAA	TAAA
250	ENST00000229214.9	0.100542	-0.0360698	-0.137521	0.338248	-0.811251	-0.947863	-0.136108	0.465753	-0.136108	0.465753	0.922714	[-0.5,0.23]	chr12	605	-1	10104	1146	12	8946	KRR1	TAA	TAAC
251	ENST00000229238.5	0.0101376	0.125738	0.114972	0.383701	-0.609083	-0.493483	0.116305	0.489176	0.116305	0.489176	0.922714	[-0.21,0.45]	chr12	50	-1	898	387	126	385	MRPL51	TAG	TAGA
252	ENST00000229266.8	0.0546607	0.0869258	0.0310393	0.858796	-0.558086	-0.525821	0.0332163	0.878515	0.0332163	0.878515	0.989347	[-0.41,0.48]	chr12	692	1	1572	1221	222	129	CHPT1	TGA	TGAA
253	ENST00000229329.7	0.00398067	0.262033	0.256684	0.150614	-0.544277	-0.286225	0.259283	0.24747	0.259283	0.24747	0.807097	[-0.18,0.71]	chr12	210	1	1748	1305	86	357	CMAS	TAG	TAGA
254	ENST00000229340.10	-0.0235562	-0.0346452	-0.0130301	0.94602	-0.0244463	-0.0355354	-0.010101	0.968341	-0.010101	0.968341	0.999541	[-0.48,0.46]	chr12	829	-1	2855	606	103	2146	RAB35	TAA	TAAT
255	ENST00000229379.3	-0.0108147	-0.2297	-0.219331	0.056164	0.144256	-0.0746301	-0.218589	0.106527	-0.218589	0.106527	0.631135	[-0.48,0.05]	chr12	836	1	537	330	14	193	COX6A1	TAA	TAAA
256	ENST00000229390.8	-0.0829141	0.0813627	0.163861	0.0795651	-0.00369244	0.160584	0.164643	0.137845	0.164643	0.137845	0.692857	[-0.05,0.38]	chr12	839	-1	1152	666	139	347	SRSF9	TGA	TGAG
257	ENST00000229595.6	-0.0431393	0.14621	0.187618	0.326826	-0.422557	-0.233207	0.190616	0.422681	0.190616	0.422681	0.904883	[-0.28,0.66]	chr6	715	1	2434	615	262	1557	ASF1A	TGA	TGAC
258	ENST00000229758.8	0.0625195	0.0244507	-0.039418	0.814132	-0.414866	-0.452935	-0.0372569	0.86252	-0.0372569	0.86252	0.989181	[-0.45,0.38]	chr6	852	-1	2054	1344	82	628	FBXO5	TGA	TGAT
259	ENST00000229794.8	0.0111077	0.00494196	-0.00749123	0.965397	-0.63644	-0.642606	-0.00528731	0.98197	-0.00528731	0.98197	0.999541	[-0.43,0.42]	chr6	344	1	3779	1083	388	2308	MAPK14	TGA	TGAG
260	ENST00000229812.8	-0.00803874	-0.129106	-0.123171	0.574914	-0.434717	-0.555784	-0.12	0.66841	-0.12	0.66841	0.97071	[-0.66,0.43]	chr6	352	-1	3585	1398	295	1892	STK38	TAG	TAGT
261	ENST00000230048.5	0.0127389	-0.0755614	-0.090566	0.679696	0.0680507	-0.0202498	-0.0870714	0.745153	-0.0870714	0.745153	0.982424	[-0.61,0.44]	chr6	99	1	4041	423	187	3431	ACOT13	TGA	TGAG
262	ENST00000230050.4	0.0338357	0.057754	0.0235144	0.792556	-1.95421	-1.93029	0.0242881	0.839064	0.0242881	0.839064	0.988946	[-0.21,0.26]	chr6	765	1	503	399	82	22	RPS12	TGA	TGAA
263	ENST00000230085.13	-0.0602223	0.534484	0.59361	0.000179095	-1.26583	-0.671124	0.596455	0.0056288	0.596455	0.0056288	0.145025	[0.17,1.03]	chr6	655	-1	1535	489	119	927	SNX3	TGA	TGAA
264	ENST00000230340.9	0.0703324	0.23146	0.159488	0.372222	0.841887	1.00301	0.16225	0.394297	0.16225	0.394297	0.894248	[-0.21,0.54]	chr6	401	1	1718	1314	64	340	BYSL	TGA	TGAG
265	ENST00000230419.9	-0.0573543	0.177832	0.233806	0.175591	-0.0339278	0.201258	0.236418	0.243155	0.236418	0.243155	0.80644	[-0.16,0.64]	chr6	425	1	4222	3213	175	834	PTK7	TGA	TGAG
266	ENST00000230431.10	-0.0800408	0.293248	0.372084	0.0197784	1.26237	1.63566	0.37397	0.0123257	0.372084	0.0197784	0.291957	[0.06,0.68]	chr6	428	-1	657	525	28	104	DNPH1	TGA	TGAC
267	ENST00000230461.11	-0.0318636	0.407438	0.438388	0.00672693	-0.814392	-0.375091	0.440669	0.037798	0.440669	0.037798	0.408201	[0.02,0.86]	chr6	555	-1	4418	1086	154	3178	TMEM30A	TAA	TAAT
268	ENST00000230640.10	0.141473	-0.115695	-0.257771	0.0233778	0.508993	0.251824	-0.256885	0.0483739	-0.256885	0.0483739	0.463132	[-0.51,0]	chr5	152	1	3961	3129	25	807	MTREX	TAG	TAGA
269	ENST00000230792.7	0.142935	-0.55932	-0.705491	0.00313033	0.353657	-0.348598	-0.70203	0.0125628	-0.70203	0.0125628	0.225588	[-1.25,-0.15]	chr5	322	-1	3488	1389	93	2006	NUDT12	TAA	TAAA
270	ENST00000231061.9	0.0366455	-0.0581107	-0.0966469	0.610294	0.88252	0.787763	-0.0939498	0.64805	-0.0939498	0.64805	0.964659	[-0.49,0.31]	chr5	598	-1	3451	912	64	2475	SPARC	TAA	TAAA
271	ENST00000231368.10	0.0336298	-0.141542	-0.17748	0.424773	-0.584545	-0.759717	-0.173602	0.538413	-0.173602	0.538413	0.933437	[-0.72,0.38]	chr5	309	1	12134	3078	76	8980	LNPEP	TAG	TAGC
272	ENST00000231498.8	0.0163861	0.0314318	0.0146208	0.8723	-0.0187665	-0.00372081	0.0152163	0.887139	0.0152163	0.887139	0.989347	[-0.2,0.23]	chr5	97	-1	8068	4176	129	3763	NUP155	TAA	TAAT
273	ENST00000231512.5	-0.0154503	0.172748	0.187386	0.162791	-0.271194	-0.0829953	0.18905	0.251876	0.18905	0.251876	0.809647	[-0.13,0.51]	chr5	417	-1	2188	798	41	1349	C5orf15	TAA	TAAA
274	ENST00000231572.8	0.0721665	-0.0563115	-0.128786	0.174985	0.322858	0.19438	-0.128312	0.237145	-0.128312	0.237145	0.801392	[-0.34,0.08]	chr5	655	1	2122	1983	28	111	RARS	TAA	TAAT
275	ENST00000232424.4	0.0383824	-0.438115	-0.478694	0.0342982	0.779849	0.303351	-0.475837	0.0625358	-0.475837	0.0625358	0.512256	[-0.98,0.03]	chr3	933	1	1575	843	233	499	HES1	TGA	TGAG
276	ENST00000232607.7	-0.0106118	-0.128667	-0.11913	0.409236	0.274635	0.156579	-0.117502	0.486619	-0.117502	0.486619	0.922714	[-0.45,0.21]	chr3	599	1	6652	1443	20	5189	UMPS	TGA	TGAG
277	ENST00000232888.7	-0.00529868	0.0228848	0.0265577	0.899023	0.519973	0.548156	0.0292808	0.898139	0.0265577	0.899023	0.989629	[-0.38,0.43]	chr3	337	-1	1542	1428	37	77	RRP9	TGA	TGAC
278	ENST00000232905.4	0.0202616	-0.42698	-0.450471	0.0589304	1.88146	1.43422	-0.446726	0.0397065	-0.450471	0.0589304	0.494803	[-0.94,0.02]	chr3	173	1	987	342	235	410	EIF1B	TAA	TAAA
279	ENST00000233025.11	0.0991229	0.0577125	-0.0422798	0.744661	0.595961	0.554551	-0.0408459	0.781322	-0.0408459	0.781322	0.986689	[-0.33,0.25]	chr3	362	1	1082	510	205	367	SPCS1	TGA	TGAG
280	ENST00000233078.8	-0.0727266	-0.0155263	0.056604	0.616387	0.0163938	0.0735941	0.0574355	0.664719	0.0574355	0.664719	0.968262	[-0.2,0.32]	chr19	47	1	2160	1224	161	775	DAZAP1	TAG	TAGC
281	ENST00000233084.8	0.0408264	-0.0563952	-0.0976417	0.331943	0.948278	0.851057	-0.0969524	0.329824	-0.0976417	0.331943	0.854469	[-0.3,0.1]	chr2	51	1	2484	2223	66	195	DDX1	TGA	TGAT
282	ENST00000233099.6	-0.0122007	-0.167772	-0.156934	0.447598	-0.0681918	-0.223763	-0.15484	0.544485	-0.15484	0.544485	0.93556	[-0.65,0.35]	chr2	180	-1	6937	6216	126	595	HEATR5B	TAA	TAAT
283	ENST00000233114.13	0.100182	-0.0965229	-0.197029	0.0404506	1.0925	0.895792	-0.196549	0.052225	-0.196549	0.052225	0.476065	[-0.39,0]	chr2	285	1	1296	1005	81	210	MDH1	TGA	TGAC
284	ENST00000233143.6	-0.0263352	-0.267963	-0.242174	0.0507433	-1.02154	-1.26316	-0.241464	0.128251	-0.241464	0.128251	0.678131	[-0.55,0.07]	chr2	401	1	461	135	78	248	TMSB10	TAA	TAAG
285	ENST00000233468.5	0.0327247	0.0264433	-0.00673575	0.952239	0.5225	0.516218	-0.00601316	0.965308	-0.00601316	0.965308	0.999541	[-0.27,0.26]	chr2	77	-1	651	378	97	176	SF3B6	TAA	TAAA
286	ENST00000233575.7	-0.044009	0.0483193	0.0911589	0.54461	0.194317	0.286645	0.0930359	0.59522	0.0930359	0.59522	0.95231	[-0.25,0.44]	chr2	129	1	2357	1413	128	816	SNX17	TAA	TAAT
287	ENST00000233627.14	0.0610748	0.0132017	-0.0497119	0.79863	2.59028	2.54241	-0.0472406	0.757249	-0.0497119	0.79863	0.987415	[-0.49,0.36]	chr19	45	1	758	642	20	96	NDUFS7	TAG	TAGC
288	ENST00000233714.8	0.0533296	-0.158577	-0.214151	0.272917	0.825217	0.61331	-0.211264	0.324211	-0.211264	0.324211	0.853516	[-0.63,0.21]	chr2	940	-1	1647	1200	75	372	LANCL1	TGA	TGAA
289	ENST00000233741.8	0.104942	-0.00117241	-0.10826	0.602455	0.286893	0.180778	-0.105003	0.672847	-0.105003	0.672847	0.970985	[-0.59,0.38]	chr2	267	-1	1683	1128	37	518	FANCL	TGA	TGAA
290	ENST00000233809.9	-0.0805975	0.136174	0.215287	0.232844	0.887744	1.10452	0.217731	0.228339	0.215287	0.232844	0.799244	[-0.14,0.56]	chr2	957	1	1414	978	104	332	IGFBP2	TAG	TAGA
291	ENST00000233813.5	0.0863262	0.37037	0.281957	0.210846	-0.389455	-0.105412	0.286405	0.31299	0.286405	0.31299	0.852891	[-0.27,0.85]	chr2	958	-1	6239	819	774	4646	IGFBP5	TGA	TGAT
292	ENST00000233838.9	-0.0896484	0.137832	0.226193	0.192021	0.338492	0.565973	0.22862	0.248669	0.22862	0.248669	0.808592	[-0.16,0.62]	chr2	410	-1	7556	2277	65	5214	GGCX	TGA	TGAA
293	ENST00000234160.5	-0.0293073	0.0671146	0.095689	0.484734	0.161676	0.258098	0.0968606	0.541616	0.0968606	0.541616	0.933757	[-0.22,0.41]	chr2	754	1	2447	1359	88	1000	GORASP2	TAA	TAAC
294	ENST00000234170.10	0.114224	-0.00805148	-0.122936	0.332772	-0.264845	-0.387121	-0.121883	0.436651	-0.121883	0.436651	0.908746	[-0.43,0.19]	chr2	184	-1	3346	3165	29	152	CEBPZ	TGA	TGAG
295	ENST00000234179.7	-0.0120261	-0.0556357	-0.0446421	0.817416	-1.88845	-1.93206	-0.0423095	0.874101	-0.0423095	0.874101	0.989347	[-0.56,0.48]	chr2	186	-1	5908	2673	560	2675	PRKD3	TAA	TAAT
296	ENST00000234198.9	-0.155687	0.00530914	0.157334	0.582307	1.58938	1.75038	0.162476	0.51221	0.157334	0.582307	0.948521	[-0.4,0.69]	chr2	764	-1	2454	987	362	1105	DLX2	TAA	TAAC
297	ENST00000234296.7	0.0610905	0.166251	0.103871	0.513265	-0.472466	-0.367306	0.106347	0.597829	0.106347	0.597829	0.952693	[-0.29,0.51]	chr2	879	-1	4288	1734	230	2324	ORC2	TGA	TGAA
298	ENST00000234301.3	-0.0145916	-0.394988	-0.381833	0.0431306	-0.831893	-1.21229	-0.379894	0.117969	-0.379894	0.117969	0.656356	[-0.85,0.1]	chr2	206	-1	2282	345	56	1881	COX7A2L	TGA	TGAG
299	ENST00000234310.8	0.0171477	-0.180951	-0.199577	0.248073	-0.349839	-0.547938	-0.197222	0.361029	-0.197222	0.361029	0.869695	[-0.62,0.23]	chr2	302	-1	3024	513	405	2106	PPP3R1	TGA	TGAC
300	ENST00000234420.9	0.079081	-0.0458331	-0.125501	0.21742	0.234227	0.109313	-0.124541	0.283433	-0.124541	0.283433	0.834623	[-0.35,0.1]	chr2	241	1	7476	4083	152	3241	MSH6	TAG	TAGA
301	ENST00000234454.6	0.00808507	0.00514086	-0.00620356	0.9776	0.114417	0.111473	-0.00140073	0.99889	-0.00140073	0.99889	0.999541	[-0.57,0.58]	chr2	343	1	1432	786	25	621	SPR	TAA	TAAG
302	ENST00000234590.10	0.0675713	-0.33446	-0.40215	2.50609e-14	0.90338	0.501349	-0.40199	4.14283e-14	-0.40199	4.14283e-14	1.897e-10	[-0.51,-0.3]	chr1	105	-1	1781	1305	116	360	ENO1	TAA	TAAG
303	ENST00000234626.11	0.0198845	0.125442	0.104827	0.421135	-0.591495	-0.485937	0.10636	0.520161	0.10636	0.520161	0.927676	[-0.22,0.43]	chr1	805	1	3215	1725	161	1329	CDC7	TGA	TGAT
304	ENST00000234677.7	-0.0850953	-0.167114	-0.0824113	0.453964	0.255808	0.173789	-0.0818098	0.520848	-0.0818098	0.520848	0.927676	[-0.33,0.17]	chr1	877	1	1914	1545	75	294	SARS	TGA	TGAA
305	ENST00000234831.9	0.057682	0.282733	0.224486	0.0906964	0.0238529	0.248904	0.225863	0.157478	0.225863	0.157478	0.725444	[-0.09,0.54]	chr1	657	-1	6691	972	250	5469	TMEM59	TAA	TAAG
306	ENST00000234875.9	0.0153601	-0.157564	-0.173325	0.0950355	-1.76869	-1.94161	-0.172624	0.209662	-0.172624	0.209662	0.77368	[-0.44,0.1]	chr1	80	-1	2061	387	22	1652	RPL22	TAA	TAAA
307	ENST00000235090.10	0.0878636	-0.0112349	-0.0994741	0.313715	0.323499	0.2244	-0.0989742	0.38837	-0.0989742	0.38837	0.886712	[-0.32,0.13]	chr1	918	-1	2456	1029	87	1340	WDR77	TAG	TAGA
308	ENST00000235329.9	-0.0474863	-0.0984259	-0.0518485	0.702704	-0.697986	-0.748926	-0.0504524	0.770764	-0.0504524	0.770764	0.985535	[-0.39,0.29]	chr1	146	1	4539	2274	322	1943	MFN2	TAG	TAGT
309	ENST00000235835.7	0.00229291	0.120271	0.116809	0.472264	0.581755	0.699734	0.11861	0.506475	0.11861	0.506475	0.924943	[-0.23,0.47]	chr1	230	-1	1362	1080	22	260	AKR7A2	TAG	TAGG
310	ENST00000236051.2	0.0357661	-0.0608007	-0.0973344	0.419176	0.45012	0.353553	-0.0963129	0.477233	-0.0963129	0.477233	0.922714	[-0.36,0.17]	chr1	539	-1	1322	921	142	259	EBNA1BP2	TAA	TAAA
311	ENST00000236273.9	0.0628251	-0.0868263	-0.151945	0.480947	0.120195	-0.0294569	-0.148221	0.568492	-0.148221	0.568492	0.945217	[-0.65,0.36]	chr1	303	-1	1757	732	35	990	SYF2	TAA	TAAT
312	ENST00000236959.14	-0.0395778	0.109791	0.148727	0.27856	2.08736	2.23673	0.149663	0.159193	0.148727	0.27856	0.829707	[-0.12,0.41]	chr2	948	1	1972	1779	84	109	ATIC	TGA	TGAT
313	ENST00000237281.5	-0.0572116	-0.213707	-0.158459	0.472611	-0.705203	-0.861699	-0.155404	0.585587	-0.155404	0.585587	0.948521	[-0.71,0.4]	chr6	817	-1	9051	2238	209	6604	FBXO30	TAA	TAAA
314	ENST00000237380.12	-0.0503506	0.226738	0.276264	0.0864539	-1.77468	-1.49759	0.278658	0.216042	0.278658	0.216042	0.780814	[-0.16,0.73]	chr4	112	1	10858	537	14	10307	MED28	TGA	TGAG
315	ENST00000237530.11	0.0132698	0.13321	0.119624	0.191997	0.687547	0.807487	0.120213	0.21877	0.120213	0.21877	0.780814	[-0.07,0.31]	chr20	240	1	2227	1896	27	304	RPN2	TAG	TAGT
316	ENST00000237654.9	-0.0498084	0.609245	0.658468	6.99956e-05	-2.55314	-1.89409	0.661022	0.00698189	0.661022	0.00698189	0.165648	[0.18,1.15]	chr4	324	-1	2759	1134	561	1064	CCNI	TAG	TAGT
317	ENST00000238112.8	0.0306688	0.114327	0.0829587	0.518903	0.219615	0.303272	0.08407	0.56662	0.08407	0.56662	0.945217	[-0.2,0.37]	chr2	26	1	2259	2055	120	84	CPSF3	TGA	TGAG
318	ENST00000238146.9	0.040904	0.466256	0.423545	0.044156	-1.25802	-0.83267	0.427784	0.136261	0.427784	0.136261	0.689387	[-0.14,1]	chr12	896	1	2656	1803	50	803	DDX55	TGA	TGAT
319	ENST00000238497.10	0.0343475	-0.0187552	-0.0556582	0.81538	-0.016352	-0.0694549	-0.0514928	0.863807	-0.0514928	0.863807	0.989181	[-0.63,0.53]	chr18	200	-1	3337	1335	217	1785	VPS4B	TAA	TAAG
320	ENST00000238616.10	-0.122439	-0.075313	0.0461701	0.764569	-0.172249	-0.125123	0.0475726	0.796597	0.0475726	0.796597	0.987349	[-0.32,0.42]	chr14	373	-1	8278	2940	127	5211	NEK9	TAG	TAGT
321	ENST00000238647.5	-0.00387849	-0.0100111	-0.00919134	0.963039	0.570867	0.564734	-0.00480539	0.98696	-0.00480539	0.98696	0.999541	[-0.51,0.5]	chr14	386	-1	4166	2391	916	859	IRF2BPL	TGA	TGAA
322	ENST00000238651.9	0.095394	-0.201533	-0.30175	0.287809	1.4933	1.19637	-0.29564	0.29662	-0.29564	0.29662	0.8473	[-0.85,0.26]	chr14	342	1	1774	1452	182	140	ACOT2	TAA	TAAA
323	ENST00000238788.14	-0.0842647	0.114288	0.196512	0.320113	0.841208	1.03976	0.19964	0.335979	0.19964	0.335979	0.854469	[-0.21,0.61]	chr2	109	1	2978	2070	51	857	TMEM214	TAG	TAGG
324	ENST00000238823.13	0.0666537	-0.129448	-0.196994	0.159808	0.157574	-0.0385279	-0.195648	0.239362	-0.195648	0.239362	0.803106	[-0.52,0.13]	chr2	175	-1	2751	1557	78	1116	FAM98A	TGA	TGAG
325	ENST00000238831.9	0.0386415	0.115873	0.0759997	0.686917	-0.837605	-0.760374	0.0787628	0.749667	0.0787628	0.749667	0.98344	[-0.41,0.57]	chr2	170	1	11955	735	252	10968	YIPF4	TGA	TGAT
326	ENST00000238892.3	-0.00911002	0.0598202	0.0658304	0.804355	0.472182	0.541112	0.0706964	0.811647	0.0706964	0.811647	0.988946	[-0.52,0.67]	chr2	232	1	1953	306	132	1515	CRIPT	TAG	TAGA
327	ENST00000239223.4	0.14049	-0.464669	-0.608787	0.0122235	0.871736	0.266577	-0.604707	0.024621	-0.604707	0.024621	0.320283	[-1.13,-0.08]	chr5	678	-1	2013	1104	243	666	DUSP1	TGA	TGAA
328	ENST00000239243.7	-0.0276052	-0.00655582	0.0182755	0.937432	0.518079	0.539128	0.0221222	0.925774	0.0182755	0.937432	0.995968	[-0.42,0.45]	chr5	690	1	2195	804	78	1313	MSX2	TAA	TAAG
329	ENST00000239367.6	-0.0150311	0.418168	0.432004	0.0458034	-1.40449	-0.971291	0.436372	0.146165	0.436372	0.146165	0.708245	[-0.15,1.03]	chr6	833	-1	3260	1503	6	1751	LRP11	TAG	TAGT
330	ENST00000239690.9	0.122166	-0.146838	-0.270829	0.164966	0.458268	0.189264	-0.268177	0.234342	-0.268177	0.234342	0.801392	[-0.71,0.17]	chr8	453	-1	3919	1752	77	2090	NUDCD1	TAA	TAAT
331	ENST00000239891.4	0.0657112	0.0454756	-0.0232833	0.918102	0.319498	0.299263	-0.0185385	0.948647	-0.0185385	0.948647	0.995968	[-0.56,0.53]	chr13	88	-1	1219	975	40	204	ALG5	TAG	TAGG
332	ENST00000240095.10	-0.0567066	0.0176442	0.0727594	0.675702	1.02337	1.09772	0.0749756	0.670992	0.0727594	0.675702	0.970985	[-0.27,0.41]	chr8	108	1	1708	1446	137	125	SLC39A14	TGA	TGAG
333	ENST00000240316.5	0.0868658	0.310224	0.222055	0.235855	-1.0491	-0.825747	0.225386	0.366433	0.225386	0.366433	0.872542	[-0.26,0.72]	chr17	765	-1	2634	1731	31	872	COIL	TGA	TGAG
334	ENST00000240423.9	-0.0249431	0.0587545	0.0829598	0.54913	0.438449	0.522147	0.0843139	0.588442	0.0843139	0.588442	0.949655	[-0.22,0.39]	chr2	461	1	6030	2226	64	3740	NCAPH	TGA	TGAG
335	ENST00000240922.8	0.000655367	0.159751	0.158602	0.162838	-1.8469	-1.6878	0.159819	0.299804	0.159819	0.299804	0.848351	[-0.14,0.46]	chr3	534	-1	6112	510	300	5302	NAA50	TGA	TGAA
336	ENST00000241502.9	-0.0452612	0.116379	0.160586	0.335734	-1.34972	-1.18808	0.163124	0.471895	0.163124	0.471895	0.922714	[-0.28,0.61]	chr3	971	1	6733	957	89	5687	FYTTD1	TAG	TAGG
337	ENST00000241600.10	-0.035114	-0.0154243	0.0186761	0.895995	0.614376	0.634066	0.0201782	0.893551	0.0186761	0.895995	0.989629	[-0.26,0.29]	chr9	623	1	1458	891	29	538	MRPS2	TGA	TGAT
338	ENST00000241704.7	-0.084417	-0.0436758	0.0403374	0.688596	0.491572	0.532313	0.0410086	0.715337	0.0410086	0.715337	0.978062	[-0.18,0.26]	chr1	1304	-1	4789	3675	230	884	COPA	TAA	TAAG
339	ENST00000242257.12	0.0327588	-0.140845	-0.175535	0.403477	-0.607825	-0.781429	-0.172261	0.524315	-0.172261	0.524315	0.929476	[-0.7,0.36]	chr7	21	-1	1601	741	29	831	MRM2	TGA	TGAG
340	ENST00000242285.10	0.0191429	-0.205826	-0.225685	0.0558702	0.744185	0.519216	-0.224608	0.080838	-0.224608	0.080838	0.57035	[-0.48,0.03]	chr9	178	1	1152	747	120	285	CLTA	TGA	TGAA
341	ENST00000242351.10	0.0555778	0.0869778	0.0302711	0.841393	-0.223612	-0.192212	0.0321619	0.860515	0.0321619	0.860515	0.989181	[-0.33,0.4]	chr7	685	-1	7177	2709	389	4079	ZC3HAV1	TAG	TAGA
342	ENST00000242576.6	-0.114013	-0.179757	-0.0667232	0.650962	0.181736	0.115992	-0.0653376	0.707493	-0.0653376	0.707493	0.977022	[-0.41,0.28]	chr12	745	1	2071	942	106	1023	UNG	TGA	TGAT
343	ENST00000242776.8	0.108192	-0.116197	-0.22534	0.0767235	1.00828	0.783895	-0.224117	0.098013	-0.224117	0.098013	0.611029	[-0.49,0.04]	chr19	386	-1	1471	1284	102	85	DDX39A	TAA	TAAC
344	ENST00000242784.5	-0.0952498	0.0429964	0.137298	0.334324	-0.005716	0.13253	0.139034	0.411816	0.139034	0.411816	0.902971	[-0.19,0.47]	chr19	342	-1	879	531	27	321	TRIR	TGA	TGAC
345	ENST00000242786.6	-0.0829893	-0.203125	-0.125151	0.672878	1.4244	1.30426	-0.119038	0.690619	-0.119038	0.690619	0.97424	[-0.7,0.47]	chr19	385	1	3190	2508	80	602	ADGRE5	TGA	TGAA
346	ENST00000242827.11	0.0753402	0.30388	0.226821	0.247238	0.280634	0.509174	0.230193	0.310659	0.230193	0.310659	0.852891	[-0.22,0.68]	chr13	156	-1	977	621	62	294	EBPL	TGA	TGAA
347	ENST00000242848.8	-0.0865914	0.441525	0.526375	0.00627803	-0.698363	-0.170247	0.530349	0.0328143	0.530349	0.0328143	0.371004	[0.04,1.03]	chr13	134	-1	8018	5007	349	2662	ZC3H13	TAA	TAAG
348	ENST00000242872.7	-0.0181752	-0.0195608	-0.00384122	0.988261	-0.253124	-0.254509	0	0.997449	0	0.997449	0.999541	[-0.57,0.58]	chr5	182	-1	1576	810	58	708	CENPK	TAA	TAAA
349	ENST00000243077.7	-0.00908757	-0.129939	-0.123583	0.60127	1.10657	0.985719	-0.119578	0.633265	-0.119578	0.633265	0.959497	[-0.61,0.37]	chr12	510	1	14897	13635	466	796	LRP1	TAG	TAGG
350	ENST00000243253.8	-0.0462541	0.142704	0.188707	0.0465278	0.196633	0.385592	0.189272	0.0851885	0.189272	0.0851885	0.583147	[-0.03,0.41]	chr3	627	1	3568	1431	116	2021	SEC61A1	TGA	TGAG
351	ENST00000243498.9	0.116745	-0.341302	-0.459539	0.00379985	0.613058	0.155012	-0.457786	0.0109023	-0.457786	0.0109023	0.213843	[-0.81,-0.11]	chr4	491	1	1481	1320	108	53	EXOSC9	TAA	TAAA
352	ENST00000243563.8	-0.0415256	-0.126783	-0.0860873	0.519332	0.733097	0.647839	-0.0848531	0.550084	-0.0848531	0.550084	0.93862	[-0.36,0.19]	chr19	760	1	1277	849	206	222	SNRPA	TAG	TAGC
353	ENST00000243776.11	-0.113773	0.259814	0.370399	0.165768	0.861438	1.23503	0.375972	0.174936	0.375972	0.174936	0.752267	[-0.17,0.93]	chr2	1011	-1	3028	2328	271	429	CHPF	TGA	TGAC
354	ENST00000244007.7	0.0710345	-0.159554	-0.231782	0.143257	-0.172937	-0.403526	-0.229971	0.23713	-0.229971	0.23713	0.801392	[-0.61,0.15]	chr20	264	1	5285	3876	197	1212	PLCG1	TAG	TAGT
355	ENST00000244020.5	0.0197381	-0.219811	-0.239844	0.0404025	-0.336697	-0.576247	-0.239427	0.0995578	-0.239427	0.0995578	0.615216	[-0.52,0.05]	chr20	270	1	4353	1035	138	3180	SRSF6	TAA	TAAC
356	ENST00000244137.12	-0.0137072	-0.110417	-0.0984045	0.581741	1.37292	1.27621	-0.0962823	0.588537	-0.0962823	0.588537	0.949655	[-0.44,0.25]	chr19	581	-1	1907	1482	31	394	PEPD	TAG	TAGA
357	ENST00000244230.7	0.0921488	0.075943	-0.0177098	0.915954	0.112689	0.0964827	-0.015235	0.942036	-0.015235	0.942036	0.995968	[-0.42,0.39]	chr2	337	1	2164	2046	32	86	MPHOSPH10	TAA	TAAT
358	ENST00000244496.6	0.0446981	0.0235689	-0.0218974	0.873913	-0.0547398	-0.0758691	-0.0206425	0.904203	-0.0206425	0.904203	0.989633	[-0.35,0.31]	chr6	421	1	1183	780	32	371	RRP36	TAA	TAAT
359	ENST00000244520.10	0.0238437	-0.126599	-0.151001	0.142278	0.666998	0.516555	-0.150236	0.184308	-0.150236	0.184308	0.752562	[-0.37,0.07]	chr6	323	1	806	480	39	287	SNRPC	TAA	TAAG
360	ENST00000244571.5	-0.122554	-0.154737	-0.0344133	0.874966	-0.680139	-0.712322	-0.0308776	0.911207	-0.0308776	0.911207	0.990367	[-0.57,0.51]	chr6	457	-1	4798	2958	24	1816	AARS2	TGA	TGAC
361	ENST00000244745.3	-0.134825	0.0076784	0.14155	0.32921	-1.11734	-0.974833	0.143317	0.452997	0.143317	0.452997	0.920264	[-0.23,0.52]	chr6	88	1	5852	1425	1767	2660	SOX4	TGA	TGAA
362	ENST00000245046.6	-0.0542834	-0.136354	-0.0836908	0.627854	0.495726	0.413656	-0.0815818	0.679816	-0.0815818	0.679816	0.972329	[-0.47,0.31]	chr3	36	-1	2777	786	459	1532	EMC3	TGA	TGAA
363	ENST00000245157.10	-0.0562275	-0.396181	-0.34277	0.149519	0.621006	0.281052	-0.339221	0.210463	-0.339221	0.210463	0.774066	[-0.87,0.19]	chr16	475	-1	2744	2166	162	416	BBS2	TAG	TAGG
364	ENST00000245206.10	0.0126739	-0.196789	-0.20992	0.0259358	0.706032	0.49657	-0.209403	0.0435695	-0.209403	0.0435695	0.442361	[-0.41,-0.01]	chr16	525	-1	2421	1293	88	1040	GOT2	TAA	TAAT
365	ENST00000245441.9	-0.0448473	0.100914	0.145024	0.362697	-2.22372	-2.07795	0.147183	0.512773	0.147183	0.512773	0.927676	[-0.29,0.59]	chr14	203	-1	10293	6402	191	3700	NIN	TAG	TAGC
366	ENST00000245539.11	-0.11137	0.0576842	0.168294	0.228647	0.38859	0.557644	0.169547	0.281146	0.169547	0.281146	0.832708	[-0.14,0.48]	chr17	921	1	1204	729	22	453	MRPS7	TAG	TAGA
367	ENST00000245544.9	0.0852087	-0.0510795	-0.137509	0.383214	0.398401	0.262113	-0.135684	0.456875	-0.135684	0.456875	0.922714	[-0.49,0.22]	chr17	919	1	2133	1971	83	79	NUP85	TGA	TGAG
368	ENST00000245552.7	0.278946	-0.189989	-0.472875	0.0668363	1.04235	0.573417	-0.467751	0.0974121	-0.467751	0.0974121	0.611029	[-1.02,0.09]	chr17	916	-1	901	606	35	260	NT5C	TGA	TGAG
369	ENST00000245615.6	-0.0507282	0.449176	0.497241	0.0400449	0.838657	1.33856	0.502072	0.0428042	0.502072	0.0428042	0.436527	[0.02,0.99]	chr19	1140	-1	2294	1419	246	629	MBOAT7	TAA	TAAG
370	ENST00000245680.7	-0.0867489	0.0389974	0.124635	0.498969	-1.95684	-1.83109	0.127416	0.620599	0.127416	0.620599	0.956441	[-0.38,0.64]	chr2	578	-1	10314	1572	233	8509	SLC35F5	TAG	TAGC
371	ENST00000245812.8	-0.151872	0.265928	0.412482	0.300213	2.2564	2.6742	0.41989	0.145327	0.412482	0.300213	0.848564	[-0.37,1.12]	chr19	175	1	970	666	27	277	ALKBH7	TGA	TGAC
372	ENST00000245816.10	0.0143945	0.182867	0.167378	0.308181	0.949886	1.11836	0.169074	0.308307	0.169074	0.308307	0.85268	[-0.16,0.5]	chr19	174	1	1072	834	44	194	CLPP	TGA	TGAG
373	ENST00000245934.11	-0.0792769	-0.242965	-0.165302	0.324192	0.609115	0.445427	-0.16332	0.376299	-0.16332	0.376299	0.879465	[-0.52,0.2]	chr19	898	-1	4195	3825	245	125	SYMPK	TGA	TGAC
374	ENST00000245960.9	-0.122774	-0.0187793	0.102445	0.570606	0.267017	0.371012	0.10491	0.613839	0.10491	0.613839	0.954353	[-0.3,0.52]	chr20	55	1	3597	1743	697	1157	CDC25B	TGA	TGAG
375	ENST00000246015.8	0.0352404	0.106652	0.0703424	0.627008	0.64535	0.716762	0.0719669	0.650515	0.0719669	0.650515	0.964677	[-0.24,0.39]	chr20	18	1	2042	792	176	1074	PSMF1	TGA	TGAT
376	ENST00000246024.7	-0.124589	0.236078	0.359464	0.0776587	-1.98969	-1.62903	0.362687	0.207088	0.362687	0.207088	0.770737	[-0.2,0.94]	chr20	77	-1	6103	1050	148	4905	TMX4	TAG	TAGA
377	ENST00000246069.12	-0.0342274	-0.0106044	0.0229406	0.861222	-0.517746	-0.494123	0.0242807	0.884427	0.0242807	0.884427	0.989347	[-0.31,0.36]	chr20	100	1	3405	498	134	2773	DSTN	TAG	TAGA
378	ENST00000246117.9	0.0418221	0.120264	0.0772291	0.607869	0.272211	0.350653	0.0791281	0.631234	0.0791281	0.631234	0.958362	[-0.25,0.41]	chr19	99	1	3680	1692	101	1887	NCLN	TGA	TGAC
379	ENST00000246139.9	-0.0850147	-0.0267061	0.057776	0.588496	0.619927	0.678236	0.0585136	0.611433	0.0585136	0.611433	0.954353	[-0.17,0.29]	chrX	352	-1	1231	582	576	73	CITED1	TAA	TAAT
380	ENST00000246151.9	0.0708457	0.249601	0.176848	0.402379	-1.05988	-0.881128	0.181011	0.522913	0.181011	0.522913	0.928429	[-0.38,0.75]	chr1	284	1	1590	636	98	856	PITHD1	TAA	TAAG
381	ENST00000246194.8	-0.0691904	0.234553	0.302583	0.0766957	-0.304979	-0.00123554	0.304724	0.147691	0.304724	0.147691	0.710541	[-0.11,0.72]	chr20	197	1	6213	921	313	4979	RALY	TAA	TAAG
382	ENST00000246337.9	0.0261663	-0.195993	-0.222996	0.109308	0.521515	0.299355	-0.221698	0.160884	-0.221698	0.160884	0.732293	[-0.53,0.09]	chr1	574	1	1193	1104	12	77	UROD	TGA	TGAG
383	ENST00000246535.4	0.131201	-0.01457	-0.148659	0.53989	0.943339	0.797568	-0.14444	0.589955	-0.14444	0.589955	0.949856	[-0.66,0.38]	chr19	587	1	1157	1077	32	48	PDCD2L	TAG	TAGA
384	ENST00000246548.9	0.00952732	0.0251081	0.0152197	0.87003	-0.533726	-0.518145	0.0159444	0.889418	0.0159444	0.889418	0.989347	[-0.21,0.24]	chr19	588	1	4005	1923	52	2030	UBA2	TGA	TGAA
385	ENST00000246802.10	-0.00500808	-0.12711	-0.123918	0.496942	0.0893128	-0.0327891	-0.121096	0.573661	-0.121096	0.573661	0.945935	[-0.54,0.3]	chr19	939	1	1504	1437	14	53	NOP53	TAG	TAGC
386	ENST00000246868.7	-0.056236	0.234089	0.289206	0.0798048	-0.877563	-0.587238	0.291705	0.179679	0.291705	0.179679	0.752562	[-0.13,0.72]	chr7	278	-1	1613	753	169	691	SBDS	TGA	TGAC
387	ENST00000246912.8	-0.0667809	0.225341	0.290562	0.157332	-0.826534	-0.534413	0.294123	0.269026	0.294123	0.269026	0.817088	[-0.23,0.82]	chr17	580	1	2586	897	53	1636	MLX	TGA	TGAC
388	ENST00000246957.10	-0.00712315	0.0483813	0.055093	0.538831	0.684228	0.739732	0.0557097	0.564274	0.0557097	0.564274	0.945217	[-0.13,0.25]	chr16	148	-1	2223	2115	16	92	TRAP1	TGA	TGAC
389	ENST00000247003.9	0.0706197	-0.0510536	-0.122828	0.434457	0.648348	0.526675	-0.121192	0.488007	-0.121192	0.488007	0.922714	[-0.46,0.22]	chr19	501	1	1793	1452	27	314	DDX49	TGA	TGAG
390	ENST00000247026.10	-0.0465207	-0.164151	-0.119548	0.58914	-0.338372	-0.456003	-0.116677	0.676326	-0.116677	0.676326	0.971118	[-0.66,0.43]	chr17	348	1	2506	1677	28	801	NSRP1	TGA	TGAT
391	ENST00000247182.6	0.105106	0.00641634	-0.100155	0.62768	-0.261793	-0.360483	-0.0973381	0.708201	-0.0973381	0.708201	0.977022	[-0.6,0.41]	chr14	265	-1	3996	855	273	2868	SIX1	TAA	TAAG
392	ENST00000247191.7	0.103129	0.096475	-0.00737604	0.952209	-0.0767181	-0.0833724	-0.00613193	0.969048	-0.00613193	0.969048	0.999541	[-0.31,0.3]	chr14	233	-1	2881	2541	124	216	DLGAP5	TGA	TGAA
393	ENST00000247225.7	0.120907	-0.177049	-0.300236	0.18028	-0.0504076	-0.348363	-0.296986	0.282733	-0.296986	0.282733	0.833928	[-0.83,0.25]	chr14	279	-1	3336	1326	121	1889	SGPP1	TGA	TGAT
394	ENST00000247665.11	0.0513958	0.108983	0.0557254	0.779141	0.944412	1.002	0.0586915	0.771289	0.0557254	0.779141	0.98647	[-0.33,0.43]	chr9	656	1	890	378	337	175	PHPT1	TGA	TGAG
395	ENST00000247843.7	-0.0878237	0.350742	0.43694	0.0321461	-0.429784	0.00878113	0.440487	0.0853239	0.440487	0.0853239	0.583147	[-0.06,0.95]	chr12	579	1	1468	684	230	554	YEATS4	TAA	TAAA
396	ENST00000248098.8	-0.0122425	0.10814	0.119878	0.324673	-1.38337	-1.26298	0.120925	0.459268	0.120925	0.459268	0.922714	[-0.2,0.44]	chr16	62	1	3695	573	34	3088	JPT2	TAA	TAAG
397	ENST00000248378.6	-0.0767886	-0.236381	-0.162117	0.504707	0.435032	0.275439	-0.15837	0.577402	-0.15837	0.577402	0.946379	[-0.71,0.4]	chr17	51	1	656	333	137	186	EMC6	TGA	TGAA
398	ENST00000248450.8	0.0356224	-0.0628184	-0.0989482	0.340795	0.501737	0.403297	-0.0982331	0.40078	-0.0982331	0.40078	0.895855	[-0.33,0.13]	chr2	966	-1	1886	1305	171	410	AAMP	TAA	TAAT
399	ENST00000248553.7	0.0534398	-0.125843	-0.182386	0.435833	1.62313	1.44385	-0.178276	0.41926	-0.182386	0.435833	0.908599	[-0.66,0.28]	chr7	331	1	777	618	40	119	HSPB1	TAA	TAAA
400	ENST00000248633.9	-0.0420984	-0.105343	-0.0657706	0.773206	-0.511684	-0.574928	-0.0619744	0.832428	-0.0619744	0.832428	0.988946	[-0.63,0.51]	chr7	386	-1	4369	3852	85	432	PEX1	TAA	TAAA
401	ENST00000248958.5	0.133861	0.391229	0.255523	0.220516	1.30092	1.55829	0.25851	0.192972	0.255523	0.220516	0.782138	[-0.15,0.65]	chr22	63	1	825	666	35	124	SDF2L1	TGA	TGAG
402	ENST00000249014.5	-0.0407171	0.622198	0.661625	0.00132728	-1.03245	-0.369531	0.665769	0.0141368	0.665769	0.0141368	0.245199	[0.13,1.21]	chr22	224	1	2148	1176	387	585	CDC42EP1	TGA	TGAG
403	ENST00000249042.8	0.0184739	-0.00817436	-0.0298909	0.895116	1.2125	1.18586	-0.0256398	0.922288	-0.0256398	0.922288	0.993589	[-0.52,0.48]	chr22	212	-1	1125	894	69	162	TST	TGA	TGAG
404	ENST00000249064.9	0.0121837	0.176788	0.163848	0.330745	-2.06304	-1.89843	0.165842	0.483792	0.165842	0.483792	0.922714	[-0.3,0.64]	chr22	125	1	3964	840	155	2969	CCDC117	TAG	TAGA
405	ENST00000249209.8	0.060558	0.321755	0.259655	0.173786	-0.183822	0.0773751	0.262706	0.262201	0.262706	0.262201	0.811776	[-0.2,0.73]	chr15	46	1	852	450	102	300	EMC4	TAA	TAAG
406	ENST00000249269.9	-0.0234385	-0.310247	-0.287625	0.0309485	0.554522	0.267713	-0.286638	0.0554285	-0.286638	0.0554285	0.487123	[-0.58,0.01]	chr7	526	1	3910	1470	25	2415	PMPCB	TAA	TAAA
407	ENST00000249289.5	-0.0923942	0.0545923	0.146035	0.28488	0.322125	0.469111	0.147569	0.342971	0.147569	0.342971	0.85874	[-0.16,0.45]	chr7	629	1	678	360	49	269	ATP6V1F	TAG	TAGG
408	ENST00000249299.7	-0.0443754	0.238305	0.28154	0.0972115	-0.700267	-0.417587	0.28415	0.194843	0.28415	0.194843	0.758662	[-0.15,0.72]	chr7	584	1	12384	291	60	12033	LSM8	TGA	TGAG
409	ENST00000249442.11	0.0704373	0.188507	0.116192	0.569993	-0.107789	0.0102796	0.119557	0.629284	0.119557	0.629284	0.957307	[-0.37,0.61]	chr2	790	1	1341	792	188	361	MTX2	TAG	TAGA
410	ENST00000249636.10	0.056112	-0.0444981	-0.102872	0.627572	-0.220776	-0.321386	-0.0994499	0.708026	-0.0994499	0.708026	0.977022	[-0.61,0.42]	chr15	302	1	8115	1956	148	6011	PIAS1	TGA	TGAT
411	ENST00000249750.9	8.37608e-05	-0.0348431	-0.0366307	0.861304	-0.606899	-0.641827	-0.033799	0.901098	-0.033799	0.901098	0.989629	[-0.55,0.49]	chr15	225	-1	3386	1557	61	1768	ALDH1A2	TAA	TAAG
412	ENST00000249776.12	0.0770324	-0.015526	-0.093729	0.573198	-0.122651	-0.21521	-0.0916574	0.654373	-0.0916574	0.654373	0.965326	[-0.49,0.31]	chr15	76	1	1714	951	115	648	KNSTRN	TAA	TAAG
413	ENST00000249806.11	-0.0933618	0.0597797	0.15194	0.375803	-0.355144	-0.202003	0.154017	0.461707	0.154017	0.461707	0.922714	[-0.26,0.57]	chr15	303	-1	2228	936	144	1148	CLN6	TGA	TGAG
414	ENST00000249837.7	-0.158309	-0.162181	-0.00550481	0.976894	0.112509	0.108637	-0.00324265	0.990768	-0.00324265	0.990768	0.999541	[-0.48,0.47]	chr15	243	-1	13300	11133	99	2068	VPS13C	TAA	TAAT
415	ENST00000250101.9	-0.0472029	0.0168123	0.0627049	0.691153	0.774842	0.838857	0.0645355	0.697506	0.0645355	0.697506	0.975528	[-0.26,0.39]	chr17	110	1	2219	372	325	1522	TXNDC17	TAA	TAAG
416	ENST00000250113.11	-0.0583873	0.0394244	0.0967104	0.567327	-0.39451	-0.296698	0.0986639	0.637813	0.0986639	0.637813	0.959975	[-0.31,0.52]	chr17	158	-1	2957	2022	335	600	FXR2	TAA	TAAA
417	ENST00000250237.10	-0.0952023	-0.456817	-0.366645	0.183392	1.36169	1.00007	-0.36074	0.188241	-0.36074	0.188241	0.754285	[-0.9,0.18]	chr19	290	1	1329	1212	22	95	QTRT1	TGA	TGAC
418	ENST00000250416.9	0.179041	-0.147815	-0.328683	0.0795183	0.30445	-0.0224056	-0.32619	0.140873	-0.32619	0.140873	0.699607	[-0.76,0.11]	chr14	18	1	1886	1752	27	107	PARP2	TGA	TGAA
419	ENST00000250454.8	0.0433313	-0.0511866	-0.0967132	0.66522	0.128047	0.033529	-0.0932555	0.731121	-0.0932555	0.731121	0.980615	[-0.62,0.44]	chr14	145	-1	1303	858	73	372	EAPP	TAA	TAAA
420	ENST00000250495.10	-0.0246524	-0.117973	-0.0940331	0.54655	-0.899007	-0.992328	-0.0925717	0.649801	-0.0925717	0.649801	0.964677	[-0.49,0.31]	chr14	109	-1	616	246	100	270	NEDD8	TGA	TGAT
421	ENST00000250498.9	0.0184332	-0.184753	-0.203937	0.102575	0.441691	0.238504	-0.202782	0.155271	-0.202782	0.155271	0.722618	[-0.48,0.08]	chr14	57	-1	684	342	67	275	DAD1	TGA	TGAA
422	ENST00000251038.10	-0.0300995	0.090874	0.120199	0.38636	-0.763707	-0.642734	0.121581	0.497903	0.121581	0.497903	0.923469	[-0.23,0.48]	chr14	416	1	18153	2211	97	15845	ZC3H14	TAG	TAGC
423	ENST00000251047.6	0.0365384	-0.0604439	-0.0976381	0.375998	-0.324183	-0.421165	-0.0966355	0.474666	-0.0966355	0.474666	0.922714	[-0.36,0.17]	chr18	187	-1	4824	1533	21	3270	LMAN1	TGA	TGAC
424	ENST00000251074.5	0.08723	-0.130169	-0.219327	0.222336	1.22409	1.00669	-0.216961	0.241562	-0.216961	0.241562	0.804957	[-0.58,0.15]	chr12	697	-1	1203	981	65	157	NUP37	TAA	TAAA
425	ENST00000251089.6	-0.0537434	-0.0115264	0.0403418	0.837167	-0.254152	-0.211935	0.0435421	0.854826	0.0435421	0.854826	0.988946	[-0.43,0.52]	chr14	384	-1	5176	2013	113	3050	ANGEL1	TGA	TGAC
426	ENST00000251195.9	-0.0560959	0.00452494	0.0594595	0.703248	0.138212	0.198833	0.0613215	0.733345	0.0613215	0.733345	0.980803	[-0.29,0.42]	chr1	452	-1	4769	3999	97	673	CLSPN	TAA	TAAG
427	ENST00000251241.9	0.100967	-0.175286	-0.277213	0.0657901	-0.60777	-0.884023	-0.275765	0.151777	-0.275765	0.151777	0.7165	[-0.65,0.1]	chr17	795	1	3575	2340	62	1173	DHX40	TAA	TAAG
428	ENST00000251412.8	-0.207052	0.206143	0.409452	0.175742	1.78697	2.20017	0.415083	0.102209	0.409452	0.175742	0.752267	[-0.19,0.97]	chr17	584	1	1782	1356	220	206	TUBG2	TGA	TGAT
429	ENST00000251413.8	-0.063561	-0.0138154	0.0490205	0.697669	0.202164	0.251909	0.0500511	0.719657	0.0500511	0.719657	0.978285	[-0.23,0.33]	chr17	583	1	1608	1356	55	197	TUBG1	TGA	TGAG
430	ENST00000251453.8	0.0291271	-0.175298	-0.204744	0.0874397	0.599139	0.394714	-0.204371	0.0312235	-0.204744	0.0874397	0.588804	[-0.45,0.03]	chr19	724	-1	631	441	54	136	RPS16	TAA	TAAG
431	ENST00000251496.7	0.0510179	0.0434122	-0.00812135	0.9469	-0.0239129	-0.0315187	-0.00705744	0.962307	-0.00705744	0.962307	0.999541	[-0.3,0.29]	chr4	115	1	4587	3048	99	1440	NCAPG	TAG	TAGG
432	ENST00000251775.9	0.0291759	0.0451223	0.0143109	0.934057	-0.335553	-0.319607	0.0170559	0.935615	0.0170559	0.935615	0.995837	[-0.42,0.46]	chr3	605	-1	2512	1353	30	1129	SNX4	TAA	TAAT
433	ENST00000251849.8	-0.0367143	-0.15518	-0.119528	0.535975	-1.79492	-1.91338	-0.117486	0.658191	-0.117486	0.658191	0.966293	[-0.63,0.4]	chr3	58	-1	3300	1947	440	913	RAF1	TAG	TAGT
434	ENST00000251900.9	-0.0945934	0.235303	0.328364	0.102224	-0.353739	-0.0238425	0.331514	0.184404	0.331514	0.184404	0.752562	[-0.16,0.83]	chrX	81	-1	4162	2103	121	1938	SCML2	TAA	TAAA
435	ENST00000252015.3	-0.0982921	0.0114986	0.108463	0.488591	0.524764	0.634555	0.110267	0.522286	0.110267	0.522286	0.927676	[-0.23,0.45]	chr20	210	-1	3162	2394	26	742	TRPC4AP	TGA	TGAC
436	ENST00000252102.8	-0.0165021	-0.110152	-0.0950146	0.566297	0.975033	0.881383	-0.0930675	0.602953	-0.0930675	0.602953	0.953842	[-0.44,0.26]	chr5	489	-1	804	300	202	302	NDUFA2	TGA	TGAA
437	ENST00000252108.7	0.0120928	-0.0824653	-0.0953291	0.491527	-0.656099	-0.750658	-0.0938682	0.596138	-0.0938682	0.596138	0.952394	[-0.44,0.25]	chr11	993	1	6103	3201	131	2771	UBE4A	TAG	TAGA
438	ENST00000252136.12	0.0870289	0.130309	0.0413731	0.837355	-0.504015	-0.460736	0.0449561	0.860447	0.0449561	0.860447	0.989181	[-0.47,0.57]	chr22	36	-1	2886	1878	320	688	TRMT2A	TAG	TAGG
439	ENST00000252137.11	-0.0232187	0.0309256	0.0514579	0.821459	0.0909692	0.145113	0.0556674	0.832992	0.0556674	0.832992	0.988946	[-0.47,0.59]	chr22	20	-1	5359	1431	11	3917	ESS2	TAG	TAGA
440	ENST00000252288.7	-0.062209	0.437197	0.496604	0.0411158	0.551521	1.05093	0.501836	0.0557738	0.501836	0.0557738	0.487123	[-0.01,1.02]	chr19	46	-1	1121	711	77	333	GAMT	TGA	TGAG
441	ENST00000252483.10	-0.00200812	-0.0432215	-0.0435753	0.832357	0.611887	0.570673	-0.0403614	0.862982	-0.0403614	0.862982	0.989181	[-0.49,0.41]	chr19	864	1	2690	1617	229	844	NECTIN2	TGA	TGAG
442	ENST00000252512.14	-0.0771784	0.183833	0.260294	0.0655197	-0.279957	-0.0189458	0.261961	0.131427	0.261961	0.131427	0.683093	[-0.08,0.6]	chr8	94	1	4870	3264	109	1497	XPO7	TGA	TGAC
443	ENST00000252542.9	0.148251	-0.179591	-0.329435	0.0446911	0.894881	0.567039	-0.327371	0.0663955	-0.327371	0.0663955	0.524453	[-0.68,0.02]	chr19	155	-1	3167	2862	61	244	SAFB2	TAA	TAAG
444	ENST00000252599.9	-0.0433881	0.316273	0.358848	0.00704035	-0.725978	-0.366317	0.360679	0.0356432	0.360679	0.0356432	0.394228	[0.02,0.7]	chr19	463	1	3647	1869	65	1713	COLGALT1	TGA	TGAG
445	ENST00000252603.7	-0.0804762	-0.0516811	0.0253235	0.929585	1.29538	1.32417	0.0297298	0.900565	0.0253235	0.929585	0.99511	[-0.48,0.51]	chr19	461	1	1008	777	24	207	AC010618.1	TAG	TAGC
446	ENST00000252622.15	-0.0132043	0.100576	0.112539	0.492926	1.52754	1.64132	0.114209	0.446544	0.112539	0.492926	0.923469	[-0.21,0.42]	chr19	77	-1	491	312	20	159	LSM7	TAG	TAGC
447	ENST00000252674.9	-0.104778	-0.116497	-0.0140719	0.944392	-0.246608	-0.258327	-0.0104621	0.967599	-0.0104621	0.967599	0.999541	[-0.5,0.48]	chr19	172	-1	4532	1680	191	2661	MLLT1	TGA	TGAC
448	ENST00000252699.7	-0.118384	-0.248241	-0.130685	0.297323	0.901105	0.771247	-0.129681	0.318439	-0.129681	0.318439	0.852891	[-0.38,0.13]	chr19	698	1	4990	2736	97	2157	ACTN4	TGA	TGAG
449	ENST00000252711.7	0.0116888	-0.274144	-0.286913	0.0550544	0.749447	0.463614	-0.285681	0.0794582	-0.285681	0.0794582	0.567612	[-0.6,0.03]	chr2	1119	-1	4855	1068	41	3746	NDUFA10	TGA	TGAA
450	ENST00000252744.6	-0.209356	0.0448981	0.251277	0.311852	0.096381	0.350634	0.256095	0.37933	0.256095	0.37933	0.88012	[-0.32,0.84]	chr5	173	1	5518	3648	15	1855	ZSWIM6	TGA	TGAT
451	ENST00000252804.9	0.00259177	0.239935	0.234876	0.318061	-0.42289	-0.185547	0.23958	0.416221	0.23958	0.416221	0.904503	[-0.34,0.83]	chr2	7	-1	6817	4440	60	2317	PXDN	TAG	TAGG
452	ENST00000252818.4	-0.0921804	0.51048	0.599726	0.0168757	0.0574685	0.660128	0.605547	0.0400166	0.605547	0.0400166	0.419305	[0.03,1.2]	chr19	482	-1	1863	1044	138	681	JUND	TGA	TGAG
453	ENST00000252934.10	-0.00683224	-0.0318533	-0.0257103	0.832356	1.39182	1.3668	-0.0248627	0.841272	-0.0248627	0.841272	0.988946	[-0.27,0.22]	chr22	340	1	3294	1428	230	1636	ATXN10	TGA	TGAA
454	ENST00000252936.7	-0.0119438	-0.16599	-0.154972	0.256908	0.346929	0.192884	-0.15355	0.329924	-0.15355	0.329924	0.853516	[-0.46,0.16]	chr10	679	-1	3885	2709	40	1136	TUBGCP2	TGA	TGAG
455	ENST00000252992.8	0.012539	0.209321	0.195347	0.340003	-0.805514	-0.608732	0.19896	0.457748	0.19896	0.457748	0.922714	[-0.33,0.73]	chr1	327	1	3935	2289	131	1515	CEP85	TGA	TGAG
456	ENST00000252999.7	0.0279884	-0.18258	-0.214896	0.429021	1.89052	1.67995	-0.209856	0.386317	-0.214896	0.429021	0.907408	[-0.79,0.32]	chr20	427	-1	11426	11088	67	271	LAMA5	TAG	TAGG
457	ENST00000253003.7	-0.0231457	-0.0398242	-0.0177685	0.89566	1.41797	1.40129	-0.0164067	0.905394	-0.0164067	0.905394	0.989633	[-0.28,0.25]	chr20	426	1	1379	1224	54	101	ADRM1	TGA	TGAG
458	ENST00000253023.7	-0.134851	0.461092	0.595464	1.8708e-06	-0.292301	0.303642	0.596654	9.27736e-05	0.596654	9.27736e-05	0.00801529	[0.3,0.9]	chr19	1281	-1	1508	552	579	377	UBE2M	TAG	TAGG
459	ENST00000253024.10	-0.0765726	-0.122014	-0.045587	0.541504	1.26962	1.22418	-0.0454187	0.521822	-0.045587	0.541504	0.933757	[-0.19,0.1]	chr19	1279	1	3364	2508	694	162	TRIM28	TGA	TGAG
460	ENST00000253039.9	0.00850069	-0.0773661	-0.0861549	0.295074	-1.06793	-1.1538	-0.0857286	0.406966	-0.0857286	0.406966	0.899806	[-0.29,0.12]	chrX	107	1	3457	1419	13	2025	EIF2S3	TGA	TGAA
461	ENST00000253047.7	-0.0671789	0.000987012	0.0633067	0.909351	2.98122	3.04938	0.0695836	0.795114	0.0633067	0.909351	0.989683	[-0.79,0.81]	chr19	924	-1	655	567	10	78	TMEM160	TGA	TGAG
462	ENST00000253048.10	0.11649	-0.168735	-0.28728	0.13802	0.125673	-0.159552	-0.284374	0.214965	-0.284374	0.214965	0.780647	[-0.73,0.17]	chr19	925	-1	6143	3912	62	2169	AC008755.1	TAG	TAGT
463	ENST00000253063.4	-0.291308	-0.0418457	0.247274	0.227787	-0.451269	-0.201807	0.250967	0.316376	0.250967	0.316376	0.852891	[-0.24,0.75]	chr1	371	1	3462	1443	330	1689	SESN2	TGA	TGAC
464	ENST00000253108.9	0.0442024	-0.170969	-0.215773	0.0488173	0.854466	0.639294	-0.214989	0.0583849	-0.214989	0.0583849	0.494803	[-0.44,0.01]	chr19	268	-1	1103	963	40	100	EIF3G	TAA	TAAG
465	ENST00000253247.9	0.0942826	0.0247671	-0.0700232	0.540711	0.233561	0.164046	-0.0691622	0.602627	-0.0691622	0.602627	0.953842	[-0.33,0.19]	chr17	861	1	2844	2160	12	672	NOL11	TGA	TGAT
466	ENST00000253251.12	-0.0315831	0.123199	0.153742	0.358052	-0.118936	0.0358451	0.155972	0.445442	0.155972	0.445442	0.914444	[-0.25,0.56]	chr1	119	1	4772	3522	839	411	UBE4B	TAA	TAAA
467	ENST00000253332.5	-0.0683087	-0.323481	-0.255849	0.0238541	-0.306856	-0.562028	-0.254905	0.064373	-0.254905	0.064373	0.519866	[-0.52,0.02]	chr6	843	1	6597	5349	189	1059	AKAP12	TAA	TAAA
468	ENST00000253339.9	0.0180236	0.122384	0.102511	0.592482	-0.190049	-0.0856884	0.105694	0.653726	0.105694	0.653726	0.965126	[-0.36,0.58]	chr6	830	-1	4256	3393	228	635	LATS1	TAA	TAAC
469	ENST00000253363.10	0.0196406	0.111863	0.091814	0.378578	-0.331783	-0.23956	0.0925604	0.462609	0.0925604	0.462609	0.922714	[-0.16,0.34]	chr20	225	-1	2488	1593	24	871	RBM39	TGA	TGAA
470	ENST00000253413.10	0.0314017	-0.349006	-0.381348	0.00736459	0.393634	0.0132255	-0.379969	0.020074	-0.379969	0.020074	0.292735	[-0.7,-0.06]	chr22	9	-1	1333	681	114	538	ATP6V1E1	TAA	TAAG
471	ENST00000253452.6	-0.090953	-0.0585419	0.0320704	0.706343	0.856473	0.888884	0.0325218	0.717906	0.0325218	0.717906	0.978285	[-0.14,0.21]	chr16	711	1	708	510	70	128	COX4I1	TGA	TGAG
472	ENST00000253457.8	-0.0833934	0.367079	0.448652	0.0177591	-0.142921	0.307551	0.452083	0.0459188	0.452083	0.0459188	0.454791	[0.01,0.9]	chr16	710	-1	1966	633	249	1084	EMC8	TAG	TAGG
473	ENST00000253458.12	0.00247107	0.170224	0.165826	0.384321	-0.0621255	0.105627	0.169002	0.447276	0.169002	0.447276	0.915547	[-0.27,0.61]	chr16	707	1	7385	3654	70	3661	GSE1	TGA	TGAC
474	ENST00000253462.8	-0.0587015	-0.198554	-0.1409	0.32209	-0.0750779	-0.21493	-0.13951	0.415264	-0.13951	0.415264	0.903915	[-0.47,0.2]	chr16	708	-1	2628	558	56	2014	GINS2	TAG	TAGA
475	ENST00000253577.9	0.0662997	-0.0758982	-0.143749	0.401236	0.201197	0.0589991	-0.141276	0.487137	-0.141276	0.487137	0.922714	[-0.54,0.26]	chrX	369	-1	4595	2262	11	2322	ABCB7	TAA	TAAG
476	ENST00000253693.7	-0.0576009	0.252563	0.308551	0.120786	-0.931516	-0.621352	0.311753	0.230275	0.311753	0.230275	0.7959	[-0.2,0.83]	chr3	79	1	4348	2442	250	1656	CAPN7	TGA	TGAT
477	ENST00000253794.7	0.00933349	-0.0235136	-0.033625	0.804753	0.374378	0.341531	-0.0323356	0.839127	-0.0323356	0.839127	0.988946	[-0.34,0.28]	chr17	590	1	1088	531	27	530	VPS25	TAG	TAGC
478	ENST00000253814.6	-0.0704176	-0.185437	-0.115738	0.353525	0.123104	0.00808536	-0.114711	0.433429	-0.114711	0.433429	0.908599	[-0.4,0.17]	chr5	529	1	3574	666	196	2712	NDFIP1	TAA	TAAA
479	ENST00000253861.5	-0.0383016	-0.201252	-0.164715	0.428112	0.160424	-0.00252742	-0.161955	0.518899	-0.161955	0.518899	0.927676	[-0.65,0.33]	chr7	656	1	4182	2925	24	1233	EXOC4	TAG	TAGC
480	ENST00000253925.11	-0.0337134	-0.0621486	-0.0296249	0.861976	-0.670337	-0.698772	-0.0275248	0.900815	-0.0275248	0.900815	0.989629	[-0.45,0.4]	chr11	721	1	5234	3609	215	1410	PPFIA1	TAA	TAAA
481	ENST00000254029.8	-0.020636	-0.0202787	-0.000920163	0.996276	-0.235818	-0.235461	0.00156026	0.992213	-0.000920163	0.996276	0.999541	[-0.36,0.36]	chrX	520	1	4114	2742	398	974	WDR44	TAA	TAAT
482	ENST00000254108.11	-0.307081	-0.232859	0.0744161	0.847003	3.46581	3.54003	0.0746101	0.783533	0.0744161	0.847003	0.988946	[-0.62,0.72]	chr16	407	1	5119	1581	105	3433	FUS	TAA	TAAT
483	ENST00000254193.11	0.000657102	-0.108681	-0.110212	0.439697	0.618881	0.509543	-0.1088	0.487696	-0.1088	0.487696	0.922714	[-0.42,0.2]	chr15	516	-1	1052	768	70	214	SNRPA1	TGA	TGAG
484	ENST00000254286.9	0.000816366	0.0129429	0.0110563	0.949111	0.574915	0.587042	0.0128401	0.942065	0.0110563	0.949111	0.995968	[-0.31,0.33]	chr14	246	1	2408	1254	69	1085	ACTR10	TAG	TAGA
485	ENST00000254322.3	0.136068	0.331173	0.193949	0.194593	-0.506089	-0.310984	0.196041	0.301975	0.196041	0.301975	0.849297	[-0.18,0.57]	chr19	390	-1	2242	1023	48	1171	DNAJB1	TAG	TAGC
486	ENST00000254337.10	0.0127354	-0.0481469	-0.0642518	0.789071	0.927115	0.866232	-0.0594026	0.822409	-0.0594026	0.822409	0.988946	[-0.57,0.46]	chr19	375	1	2278	1803	21	454	DCAF15	TGA	TGAG
487	ENST00000254480.10	-0.0313512	0.0370636	0.0680592	0.46529	-0.253651	-0.185236	0.0686288	0.534361	0.0686288	0.534361	0.933437	[-0.15,0.29]	chr3	250	-1	6354	3318	96	2940	SMARCC1	TAG	TAGC
488	ENST00000254508.7	-0.0605798	-0.01225	0.0472538	0.73086	0.41557	0.4639	0.0487298	0.738008	0.0487298	0.738008	0.982424	[-0.24,0.34]	chr3	63	-1	7206	5664	96	1446	NUP210	TAG	TAGG
489	ENST00000254528.4	-0.019668	0.125083	0.141499	0.581664	0.477017	0.621768	0.146549	0.607846	0.146549	0.607846	0.953847	[-0.42,0.72]	chr18	12	1	5944	3162	183	2599	EMILIN2	TAA	TAAG
490	ENST00000254630.12	0.0837679	-0.0237477	-0.108393	0.436543	-0.246868	-0.354384	-0.107077	0.535999	-0.107077	0.535999	0.933437	[-0.44,0.23]	chr2	422	1	6681	2070	13	4598	PTCD3	TGA	TGAA
491	ENST00000254654.8	-0.032889	0.125674	0.15621	0.467351	0.398329	0.556891	0.160104	0.509114	0.160104	0.509114	0.926931	[-0.32,0.64]	chr2	1112	-1	1455	1179	142	134	ILKAP	TGA	TGAG
492	ENST00000254719.9	-0.0483348	-0.0372194	0.0104455	0.936872	0.6696	0.680715	0.0115267	0.928911	0.0104455	0.936872	0.995968	[-0.24,0.26]	chr17	28	1	4340	1851	110	2379	RPA1	TGA	TGAG
493	ENST00000254722.9	0.0792007	0.110875	0.0302406	0.871092	0.956296	0.987971	0.0323545	0.861671	0.0302406	0.871092	0.989347	[-0.33,0.38]	chr17	26	1	1438	1257	62	119	SERPINF1	TAA	TAAT
494	ENST00000254759.8	0.0225388	-0.271354	-0.296488	0.159388	0.82626	0.532367	-0.293311	0.203164	-0.293311	0.203164	0.767241	[-0.74,0.16]	chr6	627	-1	1325	1110	16	199	COQ3	TGA	TGAA
495	ENST00000254799.11	0.0147942	0.0508732	0.0355906	0.740584	-0.311987	-0.275908	0.0365891	0.780253	0.0365891	0.780253	0.986683	[-0.22,0.3]	chr4	277	-1	6610	1443	63	5104	GRSF1	TAA	TAAG
496	ENST00000254803.4	0.0837509	0.0411787	-0.0445732	0.814297	0.434508	0.391936	-0.0414205	0.85343	-0.0414205	0.85343	0.988946	[-0.48,0.4]	chr4	275	1	2020	1440	146	434	UTP3	TGA	TGAA
497	ENST00000254900.9	-0.072881	-0.0535163	0.0180173	0.920631	-0.47174	-0.452376	0.0203576	0.92619	0.0203576	0.92619	0.994831	[-0.43,0.47]	chr5	452	-1	4388	3708	372	308	BRD8	TAA	TAAC
498	ENST00000254928.10	-0.120344	0.0191041	0.137999	0.403528	0.54315	0.682599	0.140258	0.437168	0.140258	0.437168	0.90877	[-0.21,0.5]	chr17	332	1	1841	1314	19	508	ERAL1	TGA	TGAC
499	ENST00000254940.10	0.0123945	-0.14953	-0.163333	0.355709	-0.323161	-0.485086	-0.160969	0.465824	-0.160969	0.465824	0.922714	[-0.59,0.27]	chr16	604	1	2055	543	58	1454	NIP7	TAA	TAAA
500	ENST00000254942.8	-0.193489	0.0914041	0.281915	0.277503	0.631513	0.916406	0.28644	0.315643	0.28644	0.315643	0.852891	[-0.27,0.85]	chr16	606	-1	2996	1629	36	1331	TERF2	TGA	TGAA
501	ENST00000254950.13	-0.108825	0.272993	0.381098	0.01146	-1.00626	-0.624442	0.383062	0.0551268	0.383062	0.0551268	0.487123	[-0.01,0.78]	chr16	603	1	4106	1314	162	2630	VPS4A	TAA	TAAA
502	ENST00000255175.5	-0.129437	0.288455	0.417025	0.0037324	-0.0910853	0.326807	0.418879	0.0149127	0.418879	0.0149127	0.252462	[0.08,0.76]	chr20	284	-1	1726	1422	134	170	SERINC3	TGA	TGAA
503	ENST00000255194.10	0.0703908	-0.214728	-0.286395	0.0813337	0.299518	0.0143992	-0.284385	0.142346	-0.284385	0.142346	0.703129	[-0.66,0.1]	chr5	248	-1	5838	3285	176	2377	AP3B1	TAA	TAAC
504	ENST00000255305.10	0.023432	-0.0870397	-0.111419	0.547341	-1.07797	-1.18844	-0.109081	0.657278	-0.109081	0.657278	0.966293	[-0.59,0.37]	chr13	13	-1	9921	3456	72	6393	XPO4	TAA	TAAA
505	ENST00000255390.10	0.0190491	-0.050701	-0.0708849	0.667949	-0.528832	-0.598582	-0.0686703	0.743204	-0.0686703	0.743204	0.982424	[-0.48,0.34]	chr17	214	-1	9577	906	26	8645	SCO1	TAG	TAGC
506	ENST00000255499.3	0.0325281	0.0711192	0.035619	0.879231	-0.107693	-0.0691025	0.0404995	0.880271	0.0404995	0.880271	0.989347	[-0.5,0.59]	chrX	475	1	2803	1287	213	1303	RNF128	TAA	TAAA
507	ENST00000255608.8	0.087297	0.127794	0.0383592	0.863579	-0.365878	-0.32538	0.0425034	0.874558	0.0425034	0.874558	0.989347	[-0.5,0.59]	chr19	64	-1	2649	1578	21	1050	BTBD2	TAG	TAGG
508	ENST00000255759.11	0.0538982	-0.13183	-0.187446	0.389731	-1.2184	-1.40413	-0.184419	0.528127	-0.184419	0.528127	0.932983	[-0.75,0.39]	chr16	227	-1	2264	525	18	1721	FOPNL	TAA	TAAT
509	ENST00000255882.10	0.0646111	-0.0166456	-0.0821659	0.567192	0.139814	0.0585574	-0.0806276	0.63468	-0.0806276	0.63468	0.959975	[-0.41,0.25]	chr22	46	-1	6752	6309	87	356	PI4KA	TGA	TGAG
510	ENST00000255977.7	-0.00809802	0.432214	0.439424	0.0243345	-1.52728	-1.08696	0.442953	0.10482	0.442953	0.10482	0.630366	[-0.09,0.99]	chr7	696	-1	3094	1449	161	1484	MKRN1	TAG	TAGC
511	ENST00000256031.8	-0.0147448	0.0548244	0.0691739	0.642405	-1.87505	-1.80548	0.0705175	0.73382	0.0705175	0.73382	0.980803	[-0.34,0.48]	chr3	937	-1	7322	3681	402	3239	ATP13A3	TAG	TAGC
512	ENST00000256079.9	-0.0357836	0.18568	0.220706	0.116347	-0.172103	0.0493606	0.222007	0.18848	0.222007	0.18848	0.754285	[-0.11,0.56]	chr12	242	-1	5208	3114	222	1872	IPO8	TGA	TGAA
513	ENST00000256151.8	0.0297872	0.144448	0.113214	0.572873	-0.399114	-0.284453	0.11653	0.647859	0.11653	0.647859	0.964659	[-0.39,0.62]	chr12	624	-1	1585	726	11	848	CCDC59	TAA	TAAA
514	ENST00000256255.10	0.0359591	0.407672	0.370902	0.019293	-0.88874	-0.517028	0.372918	0.0763967	0.372918	0.0763967	0.556153	[-0.04,0.79]	chr8	162	-1	2154	1020	258	876	SARAF	TAA	TAAA
515	ENST00000256319.6	0.0822748	0.367691	0.282872	0.255044	-0.22066	0.0647556	0.288232	0.352772	0.288232	0.352772	0.862897	[-0.32,0.91]	chr14	378	-1	2633	423	446	1764	ERG28	TGA	TGAG
516	ENST00000256398.13	0.0845729	0.101114	0.0146078	0.944982	-0.015036	0.00150444	0.0180331	0.939622	0.0146078	0.944982	0.995968	[-0.4,0.42]	chr8	152	1	3148	1644	76	1428	ELP3	TAA	TAAT
517	ENST00000256433.6	0.027685	-0.0716586	-0.10143	0.659947	-0.867047	-0.966391	-0.0979807	0.747969	-0.0979807	0.747969	0.982892	[-0.69,0.5]	chr18	143	-1	3679	249	87	3343	IER3IP1	TGA	TGAA
518	ENST00000256441.5	0.0175158	-0.475128	-0.495486	0.0245941	0.685635	0.192992	-0.492085	0.0467748	-0.492085	0.0467748	0.454791	[-0.98,-0.01]	chr5	195	1	1315	312	70	933	MRPS36	TAA	TAAC
519	ENST00000256442.10	0.00367576	-0.00556888	-0.00964534	0.910663	0.776262	0.767017	-0.00904251	0.922698	-0.00904251	0.922698	0.993589	[-0.19,0.18]	chr5	193	1	2029	1302	113	614	CCNB1	TAA	TAAC
520	ENST00000256443.8	-0.0365976	-0.385534	-0.351754	0.141597	0.335337	-0.0135989	-0.348591	0.214477	-0.348591	0.214477	0.780647	[-0.9,0.2]	chr5	196	1	1426	1041	90	295	CDK7	TAA	TAAA
521	ENST00000256460.8	-0.0406911	0.148332	0.186876	0.424058	-0.0266044	0.162419	0.191101	0.496184	0.191101	0.496184	0.923469	[-0.36,0.75]	chr3	27	-1	1453	1113	148	192	CAMK1	TAG	TAGG
522	ENST00000256474.2	0.0373531	-0.00326825	-0.0413529	0.827426	-1.92894	-1.96956	-0.039268	0.883406	-0.039268	0.883406	0.989347	[-0.55,0.48]	chr3	40	1	3737	642	840	2255	VHL	TGA	TGAA
523	ENST00000256545.9	0.0259548	0.27862	0.250804	0.209451	0.421937	0.674603	0.25412	0.257026	0.25412	0.257026	0.809928	[-0.19,0.7]	chr15	43	-1	1069	729	23	317	EMC7	TAG	TAGT
524	ENST00000256578.7	-0.0789073	-0.335431	-0.258393	0.177821	0.0624894	-0.194035	-0.255964	0.255611	-0.255964	0.255611	0.809647	[-0.7,0.19]	chr1	890	1	3899	2640	360	899	AMPD2	TGA	TGAG
525	ENST00000256637.8	-0.0282945	0.0290501	0.0562026	0.720651	-0.583149	-0.525804	0.0582226	0.771597	0.0582226	0.771597	0.985535	[-0.34,0.46]	chr1	881	-1	6990	2496	26	4468	SORT1	TAG	TAGC
526	ENST00000256646.7	-0.0232968	0.0261554	0.0490198	0.647712	-0.359221	-0.309769	0.0498704	0.705703	0.0498704	0.705703	0.977022	[-0.21,0.31]	chr1	985	-1	11425	7416	256	3753	NOTCH2	TGA	TGAG
527	ENST00000256689.10	-0.00713078	-0.0975098	-0.0909079	0.382426	-0.0873662	-0.177745	-0.0901367	0.46487	-0.0901367	0.46487	0.922714	[-0.33,0.15]	chr12	283	-1	4795	1521	351	2923	SLC38A2	TAA	TAAT
528	ENST00000256707.7	-0.0134017	-0.0999634	-0.0874612	0.560162	-0.599493	-0.686055	-0.0857398	0.653274	-0.0857398	0.653274	0.965126	[-0.46,0.29]	chr2	22	-1	7361	5316	182	1863	KIDINS220	TGA	TGAG
529	ENST00000256854.10	0.0501636	-0.0458789	-0.0966065	0.374174	0.0682442	-0.0277984	-0.0958686	0.454711	-0.0958686	0.454711	0.922517	[-0.35,0.16]	chr18	177	-1	2762	1647	119	996	NARS	TAA	TAAC
530	ENST00000256897.9	0.00121747	0.181311	0.178099	0.415643	-0.155668	0.0244255	0.181851	0.493823	0.181851	0.493823	0.923469	[-0.34,0.71]	chr5	283	-1	1280	972	136	172	CCNH	TAA	TAAC
531	ENST00000256997.8	0.0587745	-0.156086	-0.217498	0.35237	0.456165	0.241304	-0.213813	0.430632	-0.213813	0.430632	0.908599	[-0.74,0.32]	chr11	352	-1	2111	1272	25	814	ACP2	TGA	TGAC
532	ENST00000257013.8	0.00938599	-0.32585	-0.336882	0.0560035	0.785289	0.450052	-0.334734	0.0812787	-0.334734	0.0812787	0.571698	[-0.71,0.04]	chrX	609	1	1181	342	18	821	RTL8C	TAG	TAGG
533	ENST00000257075.9	-0.0686903	-0.275244	-0.207164	0.106767	-0.428151	-0.634704	-0.206315	0.194487	-0.206315	0.194487	0.758005	[-0.52,0.11]	chr1	389	-1	5360	3561	94	1705	PUM1	TGA	TGAG
534	ENST00000257177.9	0.0170138	-0.042792	-0.0610496	0.724331	-0.501139	-0.560945	-0.0588095	0.790323	-0.0588095	0.790323	0.987349	[-0.49,0.37]	chr1	635	-1	5853	4938	255	660	TUT4	TAA	TAAT
535	ENST00000257181.10	-0.0186231	0.125068	0.142686	0.38028	-1.22652	-1.08283	0.144865	0.50232	0.144865	0.50232	0.923469	[-0.28,0.57]	chr1	634	1	5233	939	148	4146	PRPF38A	TAA	TAAT
536	ENST00000257604.9	0.0895891	0.0576547	-0.0338165	0.85379	0.0919218	0.0599874	-0.0306979	0.889469	-0.0306979	0.889469	0.989347	[-0.46,0.4]	chr12	785	1	3178	1749	617	812	TRAFD1	TAA	TAAT
537	ENST00000257700.7	-0.0253107	-0.0534431	-0.0295999	0.862629	0.34111	0.312977	-0.0274572	0.893134	-0.0274572	0.893134	0.989629	[-0.42,0.37]	chr7	536	1	2860	2379	115	366	RINT1	TAA	TAAT
538	ENST00000257787.6	-0.0270877	0.0796464	0.104524	0.63942	0.908983	1.01572	0.107943	0.639738	0.107943	0.639738	0.959975	[-0.35,0.57]	chr6	598	-1	1898	612	549	737	AKIRIN2	TGA	TGAA
539	ENST00000257789.4	0.166585	0.00313078	-0.164889	0.347387	0.155646	-0.00780877	-0.16245	0.442889	-0.16245	0.442889	0.913921	[-0.58,0.25]	chr6	597	1	2501	2139	34	328	ORC3	TAG	TAGA
540	ENST00000257829.8	0.0230462	-0.217764	-0.241769	0.0565473	0.431207	0.190397	-0.240492	0.0963679	-0.240492	0.0963679	0.60993	[-0.52,0.04]	chr11	294	1	3973	3078	179	716	NAT10	TAG	TAGT
541	ENST00000257857.8	-0.0503272	0.225652	0.275604	0.0121878	0.720255	0.996235	0.276409	0.0186545	0.276409	0.0186545	0.280983	[0.05,0.51]	chr12	461	-1	1070	717	279	74	CD63	TAG	TAGG
542	ENST00000257904.11	-0.0541126	0.577687	0.631271	6.71176e-09	-0.917183	-0.285384	0.63236	9.00094e-06	0.63236	9.00094e-06	0.00132953	[0.35,0.91]	chr12	533	-1	1865	912	155	798	CDK4	TGA	TGAG
543	ENST00000257909.8	-0.0255257	0.199423	0.223128	0.270714	-0.494221	-0.269272	0.226611	0.377787	0.226611	0.377787	0.879465	[-0.28,0.74]	chr12	324	1	2551	2337	100	114	TROAP	TGA	TGAT
544	ENST00000257915.9	-0.10883	0.305095	0.411542	0.0713767	-0.189929	0.223996	0.415967	0.131875	0.415967	0.131875	0.68387	[-0.13,0.97]	chr12	356	-1	3546	1509	459	1578	TFCP2	TAG	TAGG
545	ENST00000257934.8	0.0325618	-0.140718	-0.174393	0.248284	0.424816	0.251536	-0.172855	0.317347	-0.172855	0.317347	0.852891	[-0.51,0.17]	chr12	411	1	6623	6363	91	169	ESPL1	TAA	TAAC
546	ENST00000258062.9	-0.0481065	0.274196	0.321269	0.0430369	-0.445956	-0.123653	0.32351	0.104441	0.32351	0.104441	0.630121	[-0.07,0.72]	chr6	795	-1	3161	2388	579	194	REPS1	TAA	TAAG
547	ENST00000258080.7	0.00247142	0.732913	0.728432	0.000716328	-0.595596	0.134845	0.733851	0.00860963	0.733851	0.00860963	0.185087	[0.19,1.29]	chr2	380	1	2370	1377	630	363	HTRA2	TGA	TGAA
548	ENST00000258091.10	0.00749045	-0.049001	-0.0566577	0.378386	0.722744	0.666253	-0.056492	0.418051	-0.056492	0.418051	0.904503	[-0.19,0.08]	chr2	350	1	1847	1632	71	144	CCT7	TGA	TGAG
549	ENST00000258105.8	0.0126219	0.0205172	0.00540844	0.988808	1.01553	1.02342	0.00919434	0.96618	0.00540844	0.988808	0.999541	[-0.45,0.45]	chr2	372	-1	496	339	20	137	MRPL53	TGA	TGAC
550	ENST00000258145.8	0.0756192	0.104776	0.0279152	0.862725	-0.465617	-0.436461	0.0300925	0.881247	0.0300925	0.881247	0.989347	[-0.38,0.44]	chr12	556	-1	5081	1659	130	3292	GNS	TAG	TAGC
551	ENST00000258169.9	0.0400291	-0.137677	-0.179713	0.379544	0.213123	0.0354163	-0.176831	0.469065	-0.176831	0.469065	0.922714	[-0.65,0.3]	chr16	685	-1	1101	483	49	569	MPHOSPH6	TAA	TAAG
552	ENST00000258198.7	0.0421681	0.0495498	0.0063117	0.963179	-1.03293	-1.02554	0.00829412	0.964628	0.00829412	0.964628	0.999541	[-0.39,0.41]	chr16	534	-1	4326	1479	18	2829	DYNC1LI2	TGA	TGAA
553	ENST00000258201.9	0.0529063	0.119472	0.0642451	0.767636	0.579922	0.646488	0.0677922	0.768346	0.0677922	0.768346	0.985535	[-0.39,0.53]	chr16	556	-1	3813	3495	71	247	FHOD1	TGA	TGAA
554	ENST00000258243.7	0.0424259	0.219477	0.1763	0.197702	0.0880648	0.265116	0.177797	0.275074	0.177797	0.275074	0.824862	[-0.14,0.5]	chr1	1758	1	5601	4575	123	903	URB2	TAA	TAAG
555	ENST00000258341.5	-0.030278	-0.0921239	-0.0622909	0.547751	0.338716	0.27687	-0.0614948	0.604061	-0.0614948	0.604061	0.953842	[-0.29,0.17]	chr1	1480	1	7929	4830	297	2802	LAMC1	TAG	TAGT
556	ENST00000258383.4	0.0976113	-0.0900288	-0.1893	0.281908	0.733004	0.545364	-0.186932	0.339954	-0.186932	0.339954	0.856243	[-0.57,0.2]	chr2	1027	1	1689	999	10	680	MRPL44	TAG	TAGC
557	ENST00000258398.8	-0.0845227	-0.0466308	0.0362764	0.85528	-0.204122	-0.16623	0.0389053	0.870986	0.0389053	0.870986	0.989347	[-0.44,0.52]	chr2	980	1	4730	3600	103	1027	TTLL4	TAA	TAAC
558	ENST00000258405.9	0.101591	-0.00649478	-0.111664	0.654284	0.925505	0.817419	-0.106743	0.698606	-0.106743	0.698606	0.976376	[-0.64,0.43]	chr2	1028	-1	2229	1197	210	822	SERPINE2	TGA	TGAA
559	ENST00000258424.2	0.0511798	-0.211937	-0.263719	0.0237017	1.89922	1.6361	-0.262841	0.0139532	-0.263719	0.0237017	0.31458	[-0.5,-0.03]	chr2	476	1	712	390	47	275	COX5B	TGA	TGAG
560	ENST00000258455.8	0.00226441	-0.207884	-0.211484	0.191405	0.555292	0.345143	-0.209752	0.251439	-0.209752	0.251439	0.809647	[-0.57,0.15]	chr2	519	1	1414	1191	24	199	MRPS9	TAA	TAAG
561	ENST00000258607.10	0.11339	-0.0462562	-0.160429	0.185174	0.0584762	-0.10117	-0.159262	0.262986	-0.159262	0.262986	0.812243	[-0.44,0.12]	chr13	173	1	3614	2049	79	1486	CKAP2	TAA	TAAG
562	ENST00000258648.6	-0.0432662	0.0168747	0.0583053	0.78765	-0.483475	-0.423335	0.0613775	0.818075	0.0613775	0.818075	0.988946	[-0.47,0.6]	chr13	143	-1	2022	813	26	1183	MED4	TGA	TGAA
563	ENST00000258729.8	0.0672692	-0.0314455	-0.0999438	0.574817	-0.860192	-0.958907	-0.0975061	0.677104	-0.0975061	0.677104	0.971264	[-0.55,0.36]	chr7	114	-1	4274	1740	381	2153	IGF2BP3	TAA	TAAA
564	ENST00000258742.10	-0.0173793	0.208459	0.223688	0.292244	-0.102631	0.123207	0.227266	0.380502	0.227266	0.380502	0.88012	[-0.28,0.74]	chr7	111	1	1571	1272	38	261	NUPL2	TAA	TAAA
565	ENST00000258772.9	-0.0209799	-0.172527	-0.152315	0.245157	0.5383	0.386753	-0.151289	0.30736	-0.151289	0.30736	0.852453	[-0.44,0.14]	chr7	213	-1	2336	1644	107	585	DDX56	TGA	TGAG
566	ENST00000258796.12	-0.141576	0.684049	0.823183	0.000687078	-0.603019	0.222606	0.82913	0.00542915	0.82913	0.00542915	0.1437	[0.24,1.43]	chr7	29	1	4805	1572	170	3063	TTYH3	TAG	TAGA
567	ENST00000258886.13	-0.0676372	0.100279	0.167407	0.15414	-0.471568	-0.303652	0.16855	0.242217	0.16855	0.242217	0.804957	[-0.11,0.45]	chr15	399	1	6324	2892	122	3310	IREB2	TAG	TAGT
568	ENST00000258947.7	-0.0749178	-0.0855553	-0.011791	0.940771	-0.126834	-0.137472	-0.00970437	0.961766	-0.00970437	0.961766	0.999302	[-0.4,0.39]	chr17	703	1	3682	1341	101	2240	CALCOCO2	TGA	TGAG
569	ENST00000258960.7	0.00357254	-0.0938211	-0.0982722	0.457453	-0.279258	-0.376652	-0.0968814	0.551746	-0.0968814	0.551746	0.939217	[-0.41,0.22]	chr17	649	1	4881	1491	13	3377	NMT1	TAA	TAAC
570	ENST00000258975.7	-0.0302559	0.0373524	0.0657193	0.753697	0.432971	0.500579	0.0688988	0.767943	0.0688988	0.767943	0.985535	[-0.39,0.54]	chr17	825	1	1446	894	189	363	TACO1	TAA	TAAC
571	ENST00000259008.6	0.0668927	-0.0853245	-0.153624	0.439921	-0.555262	-0.70748	-0.151298	0.555427	-0.151298	0.555427	0.93958	[-0.65,0.35]	chr17	812	-1	6048	3750	268	2030	BRIP1	TAA	TAAT
572	ENST00000259021.9	-0.0833294	-0.293188	-0.211547	0.286418	-0.665532	-0.87539	-0.209269	0.40854	-0.209269	0.40854	0.900473	[-0.7,0.29]	chr17	720	1	9514	1836	154	7524	KAT7	TAA	TAAA
573	ENST00000259037.8	0.0148175	-0.150449	-0.166441	0.304276	0.553354	0.388087	-0.164545	0.376896	-0.164545	0.376896	0.879465	[-0.53,0.2]	chr3	847	1	4199	570	22	3607	NDUFB5	TAA	TAAG
574	ENST00000259119.9	-0.00699524	0.064023	0.0698237	0.735323	-1.65885	-1.58783	0.0728401	0.797715	0.0728401	0.797715	0.987349	[-0.49,0.65]	chr3	822	1	7155	2055	682	4418	SKIL	TAG	TAGA
575	ENST00000259154.9	-0.0391248	0.17587	0.214043	0.146724	-1.01759	-0.802592	0.215915	0.268881	0.215915	0.268881	0.817088	[-0.17,0.6]	chr1	1677	1	4019	2448	382	1189	KCTD3	TGA	TGAA
576	ENST00000259234.10	0.0127214	0.086354	0.0718042	0.7067	0.671701	0.745333	0.0747856	0.716682	0.0747856	0.716682	0.978285	[-0.33,0.48]	chr2	619	-1	4140	3171	187	782	SAP130	TAG	TAGA
577	ENST00000259239.7	0.0403603	0.0634067	0.0210989	0.911656	-0.211823	-0.188776	0.0244061	0.915081	0.0244061	0.915081	0.991841	[-0.44,0.49]	chr2	629	1	1740	876	708	156	IMP4	TGA	TGAG
578	ENST00000259253.10	-0.00690986	0.00737548	0.0136585	0.918221	-0.458065	-0.44378	0.0148772	0.927263	0.0148772	0.927263	0.994831	[-0.31,0.35]	chr2	620	1	10650	4668	47	5935	UGGT1	TGA	TGAT
579	ENST00000259457.8	-0.017144	-0.235771	-0.219201	0.0363177	0.994709	0.776082	-0.218424	0.0415005	-0.218424	0.0415005	0.430909	[-0.43,-0.01]	chr9	474	-1	984	834	17	133	PSMB7	TGA	TGAA
580	ENST00000259477.6	0.0221693	0.279558	0.254608	0.271941	-0.190346	0.0670426	0.259921	0.357976	0.259921	0.357976	0.868157	[-0.3,0.82]	chr9	480	1	1325	462	86	777	ARPC5L	TAA	TAAA
581	ENST00000259512.9	-0.0756397	0.0913713	0.165765	0.299866	0.0442008	0.211212	0.16771	0.373821	0.16771	0.373821	0.877973	[-0.2,0.54]	chr8	483	-1	3213	756	180	2277	DERL1	TGA	TGAA
582	ENST00000259569.5	0.121831	0.0100876	-0.113002	0.572103	-1.14023	-1.25197	-0.110022	0.682251	-0.110022	0.682251	0.973332	[-0.63,0.42]	chr9	33	-1	4576	3318	11	1247	RANBP6	TGA	TGAA
583	ENST00000259632.12	-0.0202647	0.0191594	0.0380141	0.831109	0.865267	0.904691	0.0402786	0.82835	0.0380141	0.831109	0.988946	[-0.31,0.38]	chr9	134	-1	828	561	31	236	DCTN3	TGA	TGAT
584	ENST00000259667.6	-0.148235	0.569975	0.714678	0.00840446	0.306802	1.02501	0.721781	0.0163554	0.721781	0.0163554	0.261804	[0.13,1.33]	chr9	168	-1	649	492	63	94	HINT2	TGA	TGAA
585	ENST00000259818.8	-0.0679627	-0.0495014	0.0175088	0.901883	0.648894	0.667356	0.0189908	0.893612	0.0175088	0.901883	0.989629	[-0.25,0.28]	chr6	15	-1	1922	1338	110	474	TUBB2B	TAG	TAGA
586	ENST00000259873.5	-0.0401766	-0.111113	-0.0719678	0.602168	0.50066	0.429724	-0.070467	0.651194	-0.070467	0.651194	0.964677	[-0.38,0.24]	chr6	194	1	1398	777	26	595	MRPS18B	TAG	TAGG
587	ENST00000259963.4	0.0239576	0.161046	0.135983	0.486467	-1.9412	-1.80411	0.139254	0.61363	0.139254	0.61363	0.954353	[-0.4,0.69]	chr6	76	1	4726	1242	108	3376	FAM8A1	TGA	TGAT
588	ENST00000260102.8	0.0925872	-0.0751654	-0.168858	0.211124	0.758604	0.590851	-0.167274	0.25433	-0.167274	0.25433	0.809647	[-0.45,0.12]	chr8	257	1	1147	891	74	182	MRPL15	TGA	TGAA
589	ENST00000260118.7	0.0925366	0.238863	0.145375	0.326616	1.00373	1.15005	0.146833	0.335933	0.146833	0.335933	0.854469	[-0.15,0.45]	chr8	282	-1	1248	957	38	253	GGH	TGA	TGAA
590	ENST00000260129.5	0.0355056	-0.120148	-0.157263	0.425587	-0.261422	-0.417075	-0.154463	0.528906	-0.154463	0.528906	0.933175	[-0.63,0.33]	chr8	262	1	3782	2562	477	743	TGS1	TAA	TAAC
591	ENST00000260247.10	0.01575	0.330271	0.313527	0.0282402	-0.571821	-0.2573	0.315423	0.0819568	0.315423	0.0819568	0.572122	[-0.04,0.67]	chr11	893	-1	12675	714	288	11673	DCUN1D5	TAG	TAGC
592	ENST00000260270.3	-0.0728031	0.160611	0.23156	0.246867	-0.46943	-0.236015	0.23511	0.347892	0.23511	0.347892	0.861857	[-0.26,0.73]	chr11	924	1	3144	555	173	2416	FDX1	TGA	TGAA
593	ENST00000260443.9	0.0132339	-0.243792	-0.258088	0.119811	-1.12839	-1.38541	-0.256477	0.233889	-0.256477	0.233889	0.801392	[-0.68,0.17]	chr15	210	-1	1889	492	51	1346	RSL24D1	TAA	TAAA
594	ENST00000260570.8	-0.0528414	0.0307497	0.0807151	0.727676	0.0979084	0.181499	0.0849435	0.752964	0.0849435	0.752964	0.984754	[-0.45,0.63]	chr2	134	-1	5395	5250	90	55	IFT172	TAG	TAGT
595	ENST00000260585.12	-0.021422	-0.342275	-0.321486	0.0153048	-0.664131	-0.984984	-0.320398	0.0541719	-0.320398	0.0541719	0.481656	[-0.65,0.01]	chr2	99	1	8066	1194	90	6782	SELENOI	TAA	TAAT
596	ENST00000260600.9	-0.0114574	0.0905559	0.100083	0.646375	-0.824468	-0.722455	0.103892	0.712086	0.103892	0.712086	0.977152	[-0.45,0.67]	chr2	86	-1	5050	3435	852	763	ADCY3	TGA	TGAA
597	ENST00000260641.9	0.0222415	-0.0801688	-0.102859	0.29851	-0.456564	-0.558974	-0.102161	0.398793	-0.102161	0.398793	0.895855	[-0.34,0.14]	chr2	295	1	3861	1185	157	2519	ACTR2	TAA	TAAA
598	ENST00000260643.7	0.021554	0.370013	0.347537	0.0368796	-1.16159	-0.813128	0.350143	0.120979	0.350143	0.120979	0.662072	[-0.09,0.8]	chr2	116	-1	2127	1254	215	658	PREB	TAG	TAGC
599	ENST00000260665.12	-0.0317338	-0.0026526	0.028758	0.758577	0.347142	0.376224	0.0293948	0.779646	0.0293948	0.779646	0.98647	[-0.18,0.24]	chr2	218	-1	6603	4185	42	2376	LRPPRC	TGA	TGAA
600	ENST00000260731.5	0.0920543	0.0593458	-0.0331754	0.763355	0.134732	0.102023	-0.0322961	0.805025	-0.0322961	0.805025	0.988758	[-0.29,0.22]	chr10	404	1	5016	3171	246	1599	KIF11	TAA	TAAT
601	ENST00000260746.6	0.0513903	-0.394733	-0.448912	0.0450736	0.922638	0.476515	-0.445519	0.0689403	-0.445519	0.0689403	0.532385	[-0.92,0.04]	chr10	520	-1	3834	549	122	3163	ARL3	TAA	TAAA
602	ENST00000260753.8	0.115811	-0.0899888	-0.206633	0.137699	-0.20072	-0.406519	-0.205117	0.232535	-0.205117	0.232535	0.798782	[-0.54,0.13]	chr10	391	1	6306	5343	72	891	KIF20B	TAA	TAAA
603	ENST00000260762.10	0.104356	0.0891729	-0.0173303	0.932576	-0.149653	-0.164836	-0.0138363	0.959818	-0.0138363	0.959818	0.998639	[-0.52,0.5]	chr10	406	1	3564	2415	14	1135	EXOC6	TAG	TAGA
604	ENST00000260803.8	0.0788173	-0.286213	-0.36727	0.0746573	0.579441	0.214411	-0.364322	0.119421	-0.364322	0.119421	0.658828	[-0.82,0.09]	chr3	688	-1	2666	1635	154	877	DBR1	TAA	TAAG
605	ENST00000260810.9	0.0416206	-0.0134352	-0.0559039	0.693429	-1.44878	-1.50383	-0.0543571	0.776289	-0.0543571	0.776289	0.98647	[-0.43,0.32]	chr3	668	-1	5378	4569	132	677	TOPBP1	TAA	TAAT
606	ENST00000260818.11	-0.0176331	-0.181642	-0.165318	0.382807	-0.450196	-0.614204	-0.163199	0.495294	-0.163199	0.495294	0.923469	[-0.63,0.31]	chr3	660	1	7754	6732	272	750	DNAJC13	TGA	TGAA
607	ENST00000260956.9	0.105027	-0.0424498	-0.147761	0.0900638	0.385661	0.238184	-0.147202	0.130529	-0.147202	0.130529	0.683076	[-0.34,0.04]	chr2	747	1	1650	1227	115	308	SSB	TAG	TAGT
608	ENST00000261015.4	0.0307816	0.21236	0.180778	0.224536	-0.522541	-0.340963	0.18273	0.333368	0.18273	0.333368	0.854469	[-0.19,0.56]	chr2	898	-1	8100	1272	750	6078	WDR12	TGA	TGAA
609	ENST00000261023.8	-0.134479	0.304716	0.437953	0.0105586	-0.440863	-0.00166699	0.44066	0.0405119	0.44066	0.0405119	0.423077	[0.02,0.87]	chr2	821	1	7039	3147	283	3609	ITGAV	TAA	TAAC
610	ENST00000261070.6	0.0467548	0.297117	0.248076	0.260818	-0.394399	-0.144037	0.252804	0.363024	0.252804	0.363024	0.870763	[-0.29,0.81]	chr3	558	-1	684	192	93	399	COX17	TGA	TGAA
611	ENST00000261167.7	-0.045729	-0.12814	-0.0832308	0.552552	-0.245355	-0.327767	-0.0817577	0.633816	-0.0817577	0.633816	0.959662	[-0.42,0.26]	chr12	176	-1	4581	1926	172	2483	WBP11	TGA	TGAC
612	ENST00000261183.8	0.0428206	-0.0457141	-0.0892104	0.56022	-1.50013	-1.58866	-0.0875352	0.672602	-0.0875352	0.672602	0.970985	[-0.49,0.32]	chr12	609	-1	7204	2670	442	4092	OSBPL8	TAG	TAGA
613	ENST00000261191.12	0.00387103	-0.172591	-0.177264	0.279773	-0.704317	-0.880779	-0.175791	0.404749	-0.175791	0.404749	0.898374	[-0.59,0.24]	chr12	225	-1	2634	2121	197	316	INTS13	TGA	TGAA
614	ENST00000261192.12	-0.0609266	-0.164601	-0.104244	0.467036	-1.61093	-1.71461	-0.103299	0.591235	-0.103299	0.591235	0.950875	[-0.48,0.27]	chr12	215	-1	9314	1161	169	7984	BCAT1	TGA	TGAA
615	ENST00000261245.9	-0.00792602	0.166321	0.172845	0.375604	0.0212544	0.195501	0.175606	0.45787	0.175606	0.45787	0.922714	[-0.29,0.65]	chr14	267	1	2648	930	102	1616	MNAT1	TAA	TAAC
616	ENST00000261254.8	-0.0433159	-0.0645812	-0.0219068	0.861055	-0.932485	-0.95375	-0.0206433	0.897692	-0.0206433	0.897692	0.989629	[-0.34,0.3]	chr12	29	1	6493	870	279	5344	CCND2	TGA	TGAG
617	ENST00000261263.5	-0.0533879	0.23196	0.284356	0.118459	-1.32255	-1.0372	0.287234	0.244416	0.287234	0.244416	0.80644	[-0.2,0.78]	chr12	595	1	15558	678	267	14613	RAB21	TAA	TAAC
618	ENST00000261296.7	0.122052	0.570992	0.447061	0.0503782	-0.668833	-0.219894	0.452098	0.132593	0.452098	0.132593	0.686328	[-0.14,1.05]	chr13	217	-1	1797	1053	16	728	TGDS	TAA	TAAT
619	ENST00000261303.13	0.14392	-0.0538137	-0.198641	0.162824	-0.675802	-0.873536	-0.197108	0.272741	-0.197108	0.272741	0.822365	[-0.55,0.16]	chr14	423	1	4390	1323	45	3022	PSMC1	TAA	TAAT
620	ENST00000261308.10	0.00681883	0.0160424	0.00751459	0.967416	-0.229504	-0.220281	0.0106586	0.962346	0.00751459	0.967416	0.999541	[-0.37,0.39]	chr5	183	1	2109	1941	15	153	PPWD1	TAA	TAAA
621	ENST00000261313.3	-0.0603198	-0.144616	-0.0846309	0.356359	-0.049074	-0.13337	-0.0840705	0.432027	-0.0840705	0.432027	0.908599	[-0.29,0.13]	chr12	820	1	1431	564	86	781	PEBP1	TAG	TAGG
622	ENST00000261332.11	0.113002	-0.0688039	-0.182207	0.10201	-1.32638	-1.50819	-0.181381	0.217447	-0.181381	0.217447	0.780814	[-0.47,0.11]	chr18	112	-1	6256	1107	144	5005	ZNF24	TAA	TAAG
623	ENST00000261366.10	0.0763688	-0.0578274	-0.134579	0.180715	0.711796	0.577599	-0.133996	0.224356	-0.133996	0.224356	0.788433	[-0.35,0.08]	chr5	377	1	2890	1761	373	756	LMNB1	TAA	TAAA
624	ENST00000261396.6	0.0328247	0.00999192	-0.0232615	0.812234	0.316181	0.293348	-0.0225346	0.841737	-0.0225346	0.841737	0.988946	[-0.24,0.2]	chr1	1755	-1	5208	3471	92	1645	NUP133	TAA	TAAC
625	ENST00000261407.9	-0.132498	0.175738	0.305785	0.182061	0.343993	0.652229	0.309765	0.239048	0.309765	0.239048	0.803106	[-0.21,0.83]	chr12	80	-1	2235	1464	52	719	LPCAT3	TAA	TAAT
626	ENST00000261413.9	-0.0029222	-0.22079	-0.218837	0.0895714	-0.148506	-0.366373	-0.217456	0.160272	-0.217456	0.160272	0.731146	[-0.52,0.09]	chr5	212	-1	2785	1245	40	1500	MRPS27	TAA	TAAT
627	ENST00000261416.12	0.104133	0.216824	0.111523	0.498673	-0.032383	0.080308	0.113587	0.565369	0.113587	0.565369	0.945217	[-0.28,0.51]	chr5	225	1	1812	1671	28	113	HEXB	TAA	TAAA
628	ENST00000261427.10	-0.0803028	0.414415	0.4939	0.000486093	-1.68291	-1.18819	0.495884	0.0108086	0.495884	0.0108086	0.213843	[0.11,0.88]	chr4	157	1	5153	603	192	4358	UBE2K	TGA	TGAG
629	ENST00000261479.8	0.0683738	-0.0924572	-0.161381	0.187288	0.506885	0.346054	-0.160586	0.250641	-0.160586	0.250641	0.809623	[-0.43,0.11]	chr14	153	1	1029	741	120	168	PSMA6	TAA	TAAA
630	ENST00000261483.4	-0.0406489	-0.00219802	0.036202	0.876262	-0.114818	-0.0763676	0.0398347	0.882819	0.0398347	0.882819	0.989347	[-0.51,0.6]	chr5	327	1	4667	3435	1052	180	MAN2A1	TGA	TGAA
631	ENST00000261497.9	-0.102566	0.15681	0.258998	0.00568788	-0.989866	-0.73049	0.259657	0.030634	0.259657	0.030634	0.356023	[0.02,0.5]	chr17	296	-1	5189	1578	176	3435	USP22	TAG	TAGC
632	ENST00000261507.11	0.0768859	-0.0969937	-0.17532	0.29021	0.244426	0.0705463	-0.173223	0.374832	-0.173223	0.374832	0.878346	[-0.55,0.21]	chr4	624	1	2227	882	127	1218	MSMO1	TAA	TAAA
633	ENST00000261520.9	-0.0168438	0.229983	0.245662	0.226258	-1.52151	-1.27468	0.249249	0.373087	0.249249	0.373087	0.877973	[-0.3,0.81]	chr15	241	-1	7206	2949	232	4025	ICE2	TGA	TGAG
634	ENST00000261537.6	-0.0482493	0.0272546	0.0748288	0.618501	-1.87307	-1.79757	0.0762183	0.711421	0.0762183	0.711421	0.977152	[-0.33,0.49]	chr18	65	1	9576	3021	264	6291	MIB1	TAA	TAAC
635	ENST00000261574.10	0.00731341	-0.00128184	-0.0088387	0.913412	-0.27046	-0.279055	-0.0083935	0.931493	-0.0083935	0.931493	0.995269	[-0.2,0.18]	chr13	229	1	6001	3348	180	2473	IPO5	TGA	TGAA
636	ENST00000261590.13	-0.0492239	0.102507	0.151467	0.124549	0.303277	0.455008	0.152098	0.174651	0.152098	0.174651	0.752267	[-0.07,0.37]	chr18	95	1	5697	3357	75	2265	DSG2	TAA	TAAA
637	ENST00000261593.8	-0.0135071	0.0748877	0.0875675	0.4961	-1.40558	-1.31719	0.0890531	0.602706	0.0890531	0.602706	0.953842	[-0.25,0.43]	chr18	101	1	3551	738	439	2374	RNF138	TGA	TGAA
638	ENST00000261597.9	0.0534765	-0.148612	-0.203893	0.296931	0.511924	0.309836	-0.201104	0.366376	-0.201104	0.366376	0.872542	[-0.64,0.24]	chr18	10	1	2126	1929	136	61	NDC80	TGA	TGAA
639	ENST00000261600.11	0.0885491	0.188702	0.0980626	0.640054	0.0585157	0.158668	0.102083	0.683841	0.102083	0.683841	0.973666	[-0.39,0.6]	chr18	1	-1	2108	1974	28	106	THOC1	TAG	TAGC
640	ENST00000261601.8	0.0609344	-0.0267605	-0.0886483	0.562533	1.73933	1.65164	-0.0873905	0.53621	-0.0886483	0.562533	0.945217	[-0.4,0.21]	chr18	0	1	4972	1485	142	3345	USP14	TAA	TAAT
641	ENST00000261609.12	-0.0110604	-0.270231	-0.260881	0.178813	-0.604296	-0.863467	-0.25865	0.293433	-0.25865	0.293433	0.8424	[-0.74,0.22]	chr15	22	-1	15357	14505	129	723	HERC2	TAA	TAAG
642	ENST00000261622.5	-0.120838	0.211416	0.331426	0.0102431	-0.575778	-0.243525	0.33295	0.0304845	0.33295	0.0304845	0.355187	[0.03,0.64]	chr16	723	-1	4556	1524	85	2947	SLC7A5	TAG	TAGC
643	ENST00000261623.8	-0.00893536	-0.00335185	0.00440602	0.990332	2.58023	2.58582	0.00589231	0.959935	0.00440602	0.990332	0.999541	[-0.33,0.33]	chr16	729	-1	692	588	40	64	CYBA	TGA	TGAC
644	ENST00000261636.13	-0.0447449	-0.0212093	0.0221952	0.896386	-0.446245	-0.42271	0.0246178	0.909568	0.0246178	0.909568	0.989683	[-0.41,0.46]	chr12	689	-1	3197	546	127	2524	ARL1	TAA	TAAT
645	ENST00000261637.5	0.107447	0.231327	0.12283	0.449631	-0.052145	0.0717346	0.124872	0.52159	0.124872	0.52159	0.927676	[-0.26,0.51]	chr12	688	1	9031	8358	178	495	UTP20	TAA	TAAT
646	ENST00000261646.9	0.0465668	0.0272317	-0.0221157	0.91458	1.26179	1.24245	-0.0184276	0.939347	-0.0184276	0.939347	0.995968	[-0.47,0.44]	chr17	257	-1	4178	3444	185	549	SREBF1	TAG	TAGA
647	ENST00000261647.10	-0.0533954	0.210742	0.262603	0.209319	-1.20331	-0.939171	0.266355	0.34825	0.266355	0.34825	0.861857	[-0.29,0.83]	chr17	237	1	3050	1143	25	1882	TTC19	TAA	TAAA
648	ENST00000261658.7	-0.00043374	0.14433	0.143283	0.49485	-1.099	-0.954233	0.146376	0.604923	0.146376	0.604923	0.953842	[-0.41,0.71]	chr16	216	1	2903	1353	141	1409	BFAR	TGA	TGAC
649	ENST00000261667.8	0.0410832	0.0396435	-0.0029413	0.984368	0.00345413	0.00201439	-0.000480192	0.999541	-0.000480192	0.999541	0.999541	[-0.41,0.41]	chr13	157	-1	4222	1566	176	2480	KPNA3	TAA	TAAA
650	ENST00000261674.8	0.0402368	0.139017	0.0970055	0.621045	-0.107323	-0.00854364	0.100088	0.67356	0.100088	0.67356	0.970985	[-0.37,0.58]	chr12	921	1	3246	2856	141	249	SFSWAP	TGA	TGAG
651	ENST00000261681.8	-0.0180307	-0.0224329	-0.00620502	0.978225	-0.761646	-0.766049	-0.00280204	0.995074	-0.00280204	0.995074	0.999541	[-0.58,0.58]	chr14	297	1	5552	2028	661	2863	MPP5	TGA	TGAA
652	ENST00000261692.7	-0.0360265	1.11678	1.1521	7.39463e-08	-2.46849	-1.31569	1.15792	0.000474747	1.15792	0.000474747	0.0271734	[0.51,1.83]	chr12	889	-1	1346	348	238	760	CDK2AP1	TAG	TAGC
653	ENST00000261699.8	-0.0233335	0.197863	0.217197	0.441577	1.05603	1.27723	0.223075	0.424725	0.217197	0.441577	0.912438	[-0.34,0.75]	chr14	197	-1	1377	1326	18	33	L2HGDH	TAA	TAAA
654	ENST00000261700.8	-0.0463851	0.189443	0.235403	0.0239584	-0.163203	0.072625	0.236248	0.0588969	0.236248	0.0588969	0.494803	[-0.01,0.48]	chr14	210	1	7007	735	94	6178	RTRAF	TGA	TGAA
655	ENST00000261708.9	-0.00204771	0.0645604	0.0658721	0.647073	0.297045	0.363653	0.0671056	0.687839	0.0671056	0.687839	0.974163	[-0.26,0.4]	chr17	363	-1	4330	1794	81	2455	UTP6	TGA	TGAA
656	ENST00000261714.11	-0.0461161	-0.275137	-0.229926	0.0840006	0.604164	0.375144	-0.228638	0.113741	-0.228638	0.113741	0.645142	[-0.51,0.05]	chr17	350	-1	2307	1368	125	814	BLMH	TGA	TGAT
657	ENST00000261716.7	-0.00714641	0.121977	0.12817	0.454877	-2.32679	-2.19766	0.130637	0.592806	0.130637	0.592806	0.952226	[-0.35,0.62]	chr17	340	1	12407	3006	519	8882	TAOK1	TAA	TAAC
658	ENST00000261721.8	-0.0361157	0.0580994	0.0933574	0.528152	-1.48992	-1.39571	0.0953021	0.635511	0.0953021	0.635511	0.959975	[-0.3,0.49]	chr15	435	-1	3297	1449	203	1645	BTBD1	TAA	TAAT
659	ENST00000261733.7	-0.126363	-0.296688	-0.172318	0.372369	0.922571	0.752246	-0.169841	0.414761	-0.169841	0.414761	0.903915	[-0.58,0.24]	chr12	780	1	9561	1554	50	7957	ALDH2	TAA	TAAG
660	ENST00000261735.4	-0.0382971	-0.130388	-0.0928454	0.47648	0.533568	0.441477	-0.0918585	0.531718	-0.0918585	0.531718	0.933437	[-0.38,0.2]	chr12	783	1	1623	786	40	797	ERP29	TAA	TAAA
661	ENST00000261745.9	0.00538849	-0.226535	-0.233004	0.112307	-0.458229	-0.690153	-0.231456	0.206704	-0.231456	0.206704	0.770737	[-0.59,0.13]	chr12	784	-1	5771	2919	10	2842	NAA25	TAA	TAAG
662	ENST00000261772.12	-0.0322767	-0.190039	-0.158222	0.116919	0.662841	0.505079	-0.157574	0.155231	-0.157574	0.155231	0.722618	[-0.37,0.06]	chr16	616	-1	3477	2907	144	426	AARS	TGA	TGAG
663	ENST00000261776.10	-0.174686	0.701885	0.874279	0.00019537	-0.187978	0.688592	0.879823	0.00199389	0.879823	0.00199389	0.074228	[0.32,1.45]	chr16	623	-1	3096	2349	258	489	VAC14	TGA	TGAC
664	ENST00000261783.4	0.0317965	0.216827	0.183285	0.357433	0.153148	0.338178	0.186559	0.429231	0.186559	0.429231	0.907408	[-0.28,0.65]	chr14	304	1	1911	1065	58	788	ARG2	TAG	TAGG
665	ENST00000261811.6	0.0828483	0.491822	0.406728	0.105781	-0.0462142	0.362759	0.412355	0.182306	0.412355	0.182306	0.752562	[-0.19,1.03]	chr5	481	1	790	294	118	378	CYSTM1	TGA	TGAC
666	ENST00000261819.8	-0.0234973	0.356614	0.379704	0.00054261	-0.963625	-0.583514	0.380639	0.0081928	0.380639	0.0081928	0.179497	[0.1,0.67]	chr12	855	-1	2574	2268	71	235	ANAPC5	TAG	TAGA
667	ENST00000261854.10	-0.0170798	0.259847	0.274957	0.225409	-0.769251	-0.492324	0.279462	0.348867	0.279462	0.348867	0.861857	[-0.31,0.87]	chr15	189	-1	7270	1563	173	5534	SPPL2A	TAA	TAAT
668	ENST00000261866.12	-0.0590167	-0.0263455	0.0309693	0.88089	-0.238578	-0.205907	0.0338329	0.89018	0.0338329	0.89018	0.989347	[-0.46,0.53]	chr15	150	-1	7772	7332	15	425	SPG11	TAG	TAGA
669	ENST00000261868.10	-0.0311263	-0.108297	-0.0783583	0.6475	-0.549272	-0.626444	-0.0765792	0.725741	-0.0765792	0.725741	0.979168	[-0.5,0.35]	chr15	149	1	2479	777	48	1654	EIF3J	TGA	TGAC
670	ENST00000261875.10	0.07819	-0.114273	-0.192737	0.0327402	-0.0305985	-0.223062	-0.192373	0.0713044	-0.192373	0.0713044	0.542363	[-0.4,0.02]	chr15	282	1	3228	1089	169	1970	HACD3	TAA	TAAA
671	ENST00000261880.9	-0.041961	0.0355957	0.0763955	0.6141	-0.565326	-0.487769	0.0782871	0.68201	0.0782871	0.68201	0.973332	[-0.3,0.46]	chr15	297	-1	2841	948	105	1788	AAGAB	TGA	TGAA
672	ENST00000261881.9	0.146885	-0.0696183	-0.217944	0.180356	0.527816	0.311312	-0.215708	0.246478	-0.215708	0.246478	0.80644	[-0.58,0.15]	chr15	289	-1	1728	906	55	767	TIPIN	TAA	TAAG
673	ENST00000261889.9	-0.00739405	0.0427121	0.0483659	0.802014	0.364535	0.414641	0.0510112	0.811735	0.0510112	0.811735	0.988946	[-0.38,0.48]	chr15	258	1	3373	1674	21	1678	SNX1	TGA	TGAG
674	ENST00000261890.7	0.00102313	-0.248646	-0.250226	0.0279195	0.0637558	-0.185913	-0.249488	0.0630698	-0.249488	0.0630698	0.512961	[-0.51,0.01]	chr15	286	1	4895	651	95	4149	RAB11A	TAA	TAAG
675	ENST00000261900.8	0.0719031	-0.209926	-0.282944	0.160002	-1.53096	-1.81279	-0.281009	0.304181	-0.281009	0.304181	0.849297	[-0.81,0.26]	chr12	305	-1	6788	2181	32	4575	CCNT1	TAA	TAAA
676	ENST00000261908.11	-0.0787241	0.131345	0.20884	0.236815	0.000171833	0.210241	0.211183	0.32072	0.211183	0.32072	0.853516	[-0.21,0.63]	chr15	333	1	7108	4386	213	2509	NEO1	TGA	TGAC
677	ENST00000261937.11	-0.0494443	-0.0227817	0.0244224	0.913641	-0.16064	-0.133978	0.0280228	0.911738	0.0244224	0.913641	0.991192	[-0.41,0.45]	chr5	770	-1	5833	4092	55	1686	FLT4	TAA	TAAG
678	ENST00000261942.7	0.0511011	-0.228328	-0.280091	0.0276348	-0.373775	-0.653204	-0.278929	0.0756184	-0.278929	0.0756184	0.554575	[-0.59,0.03]	chr5	703	1	4485	1338	23	3124	FAF2	TGA	TGAC
679	ENST00000262027.10	0.0159632	-0.200045	-0.216496	0.0247216	0.453837	0.237829	-0.215771	0.044988	-0.215771	0.044988	0.451065	[-0.43,0]	chr12	520	1	2797	2703	23	71	MARS	TAA	TAAA
680	ENST00000262030.8	-0.0410348	-0.0625888	-0.0216237	0.706336	0.863304	0.84175	-0.0214676	0.720681	-0.0214676	0.720681	0.978285	[-0.14,0.1]	chr12	498	-1	1759	1590	21	148	ATP5F1B	TGA	TGAG
681	ENST00000262033.11	0.0279217	-0.0372507	-0.0654725	0.427027	-0.566246	-0.631418	-0.065017	0.51042	-0.065017	0.51042	0.927466	[-0.26,0.13]	chr12	499	-1	1898	483	285	1130	PTGES3	TAA	TAAG
682	ENST00000262039.9	-0.00139478	-0.297548	-0.299097	0.225846	0.213712	-0.082442	-0.295185	0.315358	-0.295185	0.315358	0.852891	[-0.87,0.28]	chr18	124	1	9415	2664	58	6693	PIK3C3	TGA	TGAA
683	ENST00000262056.13	0.0417621	0.010866	-0.0310334	0.824084	-3.38159	-3.41249	-0.0300424	0.877352	-0.0300424	0.877352	0.989347	[-0.41,0.35]	chr12	400	1	4148	1836	326	1986	EIF4B	TAG	TAGA
684	ENST00000262061.7	0.00221162	-0.16859	-0.171253	0.129771	-0.121114	-0.291916	-0.170606	0.21271	-0.170606	0.21271	0.776715	[-0.44,0.1]	chr12	434	1	1890	534	33	1323	COPZ1	TGA	TGAA
685	ENST00000262067.5	-0.115098	0.553531	0.667075	0.00081552	-1.04084	-0.37221	0.67088	0.0118512	0.67088	0.0118512	0.220237	[0.15,1.21]	chr7	87	1	1873	615	213	1045	TSPAN13	TGA	TGAT
686	ENST00000262093.10	-0.105233	-0.0747424	0.0287184	0.888274	-0.631099	-0.600609	0.0317787	0.903208	0.0317787	0.903208	0.989633	[-0.5,0.57]	chr18	176	-1	7677	1272	82	6323	FECH	TGA	TGAC
687	ENST00000262133.11	0.00430519	0.213015	0.207321	0.313934	-1.53242	-1.32372	0.211091	0.460426	0.211091	0.460426	0.922714	[-0.35,0.78]	chr16	460	1	4854	3420	86	1348	RBL2	TGA	TGAG
688	ENST00000262144.11	-0.115597	0.177073	0.29075	0.197659	-0.983258	-0.690589	0.294653	0.324569	0.294653	0.324569	0.853516	[-0.29,0.89]	chr16	650	-1	5878	2925	106	2847	WDR59	TGA	TGAA
689	ENST00000262177.9	-0.146252	-0.0214425	0.123644	0.409516	-0.612727	-0.487918	0.125432	0.504596	0.125432	0.504596	0.923469	[-0.24,0.5]	chr7	819	1	2489	981	167	1341	DNAJB6	TAG	TAGA
690	ENST00000262187.10	-0.0710339	0.688448	0.758718	0.000115251	-2.21631	-1.45682	0.762833	0.00871154	0.762833	0.00871154	0.186402	[0.19,1.35]	chr7	799	-1	2046	555	384	1107	RHEB	TGA	TGAT
691	ENST00000262193.7	-0.0388259	-0.105505	-0.0670205	0.408437	1.12373	1.05705	-0.0666471	0.421931	-0.0666471	0.421931	0.90452	[-0.23,0.1]	chr6	919	-1	891	726	65	100	PSMB1	TGA	TGAT
692	ENST00000262198.9	-0.0324754	-0.167518	-0.136508	0.504587	-0.738539	-0.873582	-0.133757	0.612689	-0.133757	0.612689	0.954353	[-0.65,0.39]	chr18	243	1	5157	3396	224	1537	ADNP2	TAA	TAAA
693	ENST00000262213.7	-0.0628598	0.321254	0.383458	0.00241225	-1.41032	-1.02621	0.384977	0.0248825	0.384977	0.0248825	0.321856	[0.05,0.72]	chr8	311	-1	3056	1125	217	1714	TRAM1	TAA	TAAT
694	ENST00000262215.8	0.023545	0.0616953	0.0366516	0.854315	-0.850611	-0.812461	0.0399282	0.87846	0.0399282	0.87846	0.989347	[-0.48,0.57]	chr8	303	-1	7320	5550	494	1276	ARFGEF1	TGA	TGAT
695	ENST00000262225.8	-0.103131	0.417638	0.520284	2.25414e-06	-1.76169	-1.24092	0.521514	0.000537736	0.521514	0.000537736	0.0286313	[0.23,0.82]	chr12	895	1	2544	606	85	1853	TMED2	TAA	TAAA
696	ENST00000262238.9	0.0213133	0.0803923	0.0584343	0.623817	-0.747943	-0.688864	0.0595021	0.694331	0.0595021	0.694331	0.97466	[-0.24,0.36]	chr14	491	1	6538	1245	101	5192	YY1	TGA	TGAA
697	ENST00000262288.7	-0.0348147	0.0863884	0.119824	0.522465	0.229781	0.350984	0.122409	0.574269	0.122409	0.574269	0.946379	[-0.31,0.55]	chr17	766	1	1942	1359	55	528	SCPEP1	TAG	TAGG
698	ENST00000262291.9	0.0110214	-0.0173884	-0.0298646	0.853119	0.66393	0.635521	-0.0277988	0.880566	-0.0277988	0.880566	0.989347	[-0.39,0.33]	chr17	798	1	3686	1221	121	2344	VMP1	TAA	TAAG
699	ENST00000262302.14	-0.0150157	0.270744	0.283517	0.188567	0.739589	1.02535	0.286934	0.19895	0.286934	0.19895	0.764993	[-0.15,0.73]	chr16	68	1	1349	816	61	472	NUBP2	TGA	TGAC
700	ENST00000262306.11	0.0415481	0.113524	0.0713489	0.556713	0.928348	1.00032	0.0724178	0.543304	0.0713489	0.556713	0.940314	[-0.17,0.3]	chr16	109	-1	582	486	38	58	ELOB	TAA	TAAT
701	ENST00000262315.14	0.171097	-0.138229	-0.312479	0.209067	1.28218	0.972857	-0.308334	0.223795	-0.308334	0.223795	0.787066	[-0.8,0.19]	chr16	38	1	3092	2928	65	99	CHTF18	TAG	TAGT
702	ENST00000262318.12	-0.00540438	-0.0445996	-0.0418295	0.842206	0.501291	0.462096	-0.03825	0.873516	-0.03825	0.873516	0.989347	[-0.5,0.43]	chr16	56	-1	3717	2706	83	928	CLCN7	TGA	TGAG
703	ENST00000262319.11	0.0503274	-0.220501	-0.272794	0.164189	1.77294	1.50211	-0.27033	0.134152	-0.272794	0.164189	0.739564	[-0.67,0.11]	chr16	58	1	3314	2514	282	518	TELO2	TAG	TAGT
704	ENST00000262367.9	-0.0853101	-0.00139439	0.0827357	0.615607	0.479282	0.563198	0.0845455	0.637806	0.0845455	0.637806	0.959975	[-0.27,0.44]	chr16	149	-1	10803	7329	810	2664	CREBBP	TAG	TAGC
705	ENST00000262370.12	-0.0742443	-0.0121858	0.0592127	0.817978	0.797887	0.859945	0.0632531	0.806154	0.0592127	0.817978	0.988946	[-0.43,0.54]	chr16	160	1	3930	1731	135	2064	MGRN1	TGA	TGAG
706	ENST00000262374.9	-0.0134867	0.189454	0.200469	0.377469	0.252115	0.455055	0.204718	0.433678	0.204718	0.433678	0.908599	[-0.31,0.73]	chr16	173	1	2132	1395	31	706	ALG1	TAA	TAAC
707	ENST00000262394.7	-0.0439827	-0.608778	-0.566553	0.00560011	-0.615079	-1.17987	-0.564752	0.0283387	-0.564752	0.0283387	0.344073	[-1.07,-0.06]	chr17	305	1	5105	1266	282	3557	WSB1	TAG	TAGA
708	ENST00000262428.5	-0.0896561	-0.136227	-0.0475831	0.78014	-0.455047	-0.501618	-0.0455623	0.832636	-0.0455623	0.832636	0.988946	[-0.47,0.38]	chr16	700	-1	1842	429	164	1249	COTL1	TAA	TAAC
709	ENST00000262432.12	0.0326933	0.2469	0.212809	0.257632	-0.494635	-0.280429	0.215607	0.372832	0.215607	0.372832	0.877973	[-0.26,0.7]	chr7	622	1	2182	1137	37	1008	METTL2B	TAA	TAAG
710	ENST00000262455.7	-0.0754949	-0.120952	-0.0466665	0.762864	1.29497	1.24951	-0.0452082	0.776249	-0.0452082	0.776249	0.98647	[-0.35,0.27]	chr9	356	-1	4808	1221	160	3427	ERP44	TAA	TAAA
711	ENST00000262460.5	-0.0986905	0.0429516	0.140351	0.404261	-0.912408	-0.770766	0.142438	0.515714	0.142438	0.515714	0.927676	[-0.29,0.58]	chr20	152	1	3311	591	148	2572	GINS1	TGA	TGAC
712	ENST00000262461.7	-0.0406433	-0.128121	-0.0885083	0.550504	-0.00890752	-0.0963857	-0.087072	0.626538	-0.087072	0.626538	0.956441	[-0.44,0.26]	chr5	383	1	6874	3639	189	3046	SLC12A2	TAA	TAAA
713	ENST00000262498.8	-0.0591671	0.10798	0.165423	0.422296	0.0678562	0.235003	0.168418	0.489774	0.168418	0.489774	0.922714	[-0.31,0.65]	chr16	516	-1	1281	582	266	433	CFAP20	TAA	TAAC
714	ENST00000262506.8	-0.0901854	0.000115959	0.0887077	0.621489	0.753285	0.843586	0.0909635	0.627026	0.0909635	0.627026	0.956441	[-0.28,0.46]	chr16	517	-1	1887	1053	370	464	CSNK2A2	TGA	TGAA
715	ENST00000262507.11	-0.00527067	0.00354136	0.00661035	0.972602	-0.612563	-0.603751	0.0105752	0.966496	0.00661035	0.972602	0.999541	[-0.42,0.44]	chr16	501	1	1630	957	27	646	COQ9	TGA	TGAG
716	ENST00000262519.14	-0.137614	0.0588245	0.194381	0.35481	0.110096	0.306534	0.197678	0.413728	0.197678	0.413728	0.903834	[-0.28,0.68]	chr16	395	1	5991	5124	226	641	SETD1A	TGA	TGAG
717	ENST00000262525.6	0.0646215	-0.0571902	-0.123288	0.577581	-1.13274	-1.25456	-0.120452	0.687659	-0.120452	0.687659	0.974163	[-0.7,0.47]	chr16	390	-1	6083	2610	211	3262	ZNF629	TGA	TGAA
718	ENST00000262544.6	0.0188087	-0.187006	-0.206994	0.173198	0.44528	0.239465	-0.205519	0.239581	-0.205519	0.239581	0.803106	[-0.55,0.14]	chr20	110	1	3176	2304	490	382	SEC23B	TAA	TAAG
719	ENST00000262554.7	0.0205288	-0.152794	-0.174722	0.262583	0.175931	0.00260844	-0.172857	0.348571	-0.172857	0.348571	0.861857	[-0.53,0.19]	chr9	293	-1	2783	1422	43	1318	SPTLC1	TAG	TAGG
720	ENST00000262570.10	-0.0172123	0.23023	0.246339	0.147283	-1.40154	-1.1541	0.248973	0.280845	0.248973	0.280845	0.832355	[-0.2,0.71]	chr7	655	-1	1604	684	153	767	CHCHD3	TAA	TAAA
721	ENST00000262577.6	-0.0610938	0.119288	0.175363	0.624342	1.69981	1.88019	0.182314	0.549597	0.175363	0.624342	0.956441	[-0.52,0.82]	chr8	556	-1	3270	2847	26	397	ZC3H3	TGA	TGAG
722	ENST00000262613.10	-0.00351848	-0.228022	-0.227761	0.328987	0.905197	0.680693	-0.223878	0.372089	-0.223878	0.372089	0.877793	[-0.71,0.27]	chr17	900	1	1993	1077	219	697	SLC9A3R1	TGA	TGAG
723	ENST00000262633.9	0.0449075	0.0783347	0.0323407	0.833917	1.53025	1.56367	0.0339544	0.807093	0.0323407	0.833917	0.988946	[-0.26,0.32]	chr19	620	1	1692	1443	118	131	RBM42	TAG	TAGG
724	ENST00000262644.9	-0.0565943	-0.0237147	0.0319701	0.841487	-1.78702	-1.75414	0.0340171	0.879084	0.0340171	0.879084	0.989347	[-0.41,0.48]	chr8	269	-1	7224	1080	282	5862	IMPAD1	TGA	TGAG
725	ENST00000262710.5	-0.00817339	0.0997841	0.107517	0.351167	-0.360343	-0.252386	0.108479	0.444428	0.108479	0.444428	0.914444	[-0.17,0.39]	chr14	74	-1	4935	4026	328	581	ACIN1	TAG	TAGC
726	ENST00000262803.9	0.0481182	-0.155295	-0.204566	0.154248	0.931998	0.728585	-0.203117	0.171901	-0.203117	0.171901	0.752267	[-0.49,0.09]	chr19	499	1	5348	3357	272	1719	UPF1	TAA	TAAA
727	ENST00000262812.9	-0.035386	-0.0619335	-0.0274203	0.827488	1.21059	1.18404	-0.0262895	0.830306	-0.0262895	0.830306	0.988946	[-0.27,0.21]	chr19	500	-1	1131	927	39	165	COPE	TGA	TGAG
728	ENST00000262815.13	-0.0136359	-0.242828	-0.231383	0.272714	-0.333385	-0.562578	-0.228529	0.383669	-0.228529	0.383669	0.882891	[-0.74,0.29]	chr19	513	1	4845	1842	31	2972	MAU2	TGA	TGAG
729	ENST00000262820.7	0.11317	-0.0330953	-0.148641	0.494293	0.355396	0.20913	-0.14482	0.571529	-0.14482	0.571529	0.945718	[-0.64,0.36]	chrX	519	-1	3972	1968	910	1094	KLHL13	TAA	TAAG
730	ENST00000262854.11	-0.0601372	-0.0349329	0.0249125	0.76767	0.134248	0.159453	0.0253176	0.792718	0.0253176	0.792718	0.987349	[-0.17,0.22]	chrX	267	-1	14731	13125	393	1213	HUWE1	TAA	TAAT
731	ENST00000262879.11	0.0229979	-0.0923978	-0.11695	0.549217	-1.00167	-1.11707	-0.114319	0.657863	-0.114319	0.657863	0.966293	[-0.62,0.39]	chr20	254	1	8633	4485	257	3891	RALGAPB	TAG	TAGA
732	ENST00000262887.9	-0.0205444	0.0640946	0.0815423	0.743083	0.325128	0.409767	0.0862405	0.757123	0.0862405	0.757123	0.984754	[-0.47,0.65]	chr19	826	-1	2802	1902	548	352	XRCC1	TGA	TGAA
733	ENST00000262890.7	-0.0950816	0.281276	0.374383	0.0744582	0.583434	0.959792	0.377557	0.0955109	0.377557	0.0955109	0.60993	[-0.07,0.83]	chr19	801	-1	1003	696	262	45	PAFAH1B3	TAA	TAAG
734	ENST00000262919.10	-0.0775575	-0.276818	-0.20149	0.315905	-0.0181042	-0.217365	-0.198713	0.410763	-0.198713	0.410763	0.901238	[-0.67,0.28]	chr20	49	1	8651	4290	90	4271	ATRN	TGA	TGAT
735	ENST00000262947.7	-0.00334231	0.203546	0.205593	0.229598	0.588661	0.795549	0.208026	0.271576	0.208026	0.271576	0.821909	[-0.16,0.58]	chr19	144	-1	1018	522	36	460	MYDGF	TGA	TGAC
736	ENST00000262948.9	-0.0614715	0.398228	0.458816	0.00383443	-0.970911	-0.511211	0.461322	0.0284035	0.461322	0.0284035	0.344073	[0.05,0.88]	chr19	124	-1	1734	1203	254	277	MAP2K2	TGA	TGAC
737	ENST00000262960.13	0.0040161	0.0585908	0.0529202	0.787163	0.0649253	0.1195	0.0556422	0.809946	0.0556422	0.809946	0.988946	[-0.4,0.52]	chr19	145	-1	4295	2679	278	1338	DPP9	TGA	TGAG
738	ENST00000262965.10	-0.0906345	0.100967	0.189984	0.356564	-1.29126	-1.09965	0.193153	0.484847	0.193153	0.484847	0.922714	[-0.35,0.74]	chr19	57	-1	4743	1965	355	2423	TCF3	TGA	TGAA
739	ENST00000262982.3	-0.00463845	-0.0265761	-0.0220606	0.746888	0.0886145	0.0666768	-0.0218983	0.778384	-0.0218983	0.778384	0.98647	[-0.17,0.13]	chr20	349	1	3550	2916	123	511	CSE1L	TAA	TAAA
740	ENST00000262990.9	0.150711	-0.0983075	-0.250719	0.178515	-0.232533	-0.481552	-0.248303	0.287242	-0.248303	0.287242	0.837446	[-0.7,0.21]	chr4	537	1	1891	963	220	708	ZNF330	TAG	TAGG
741	ENST00000263012.10	0.00165727	0.204939	0.202698	0.101582	0.300955	0.504237	0.203749	0.151349	0.203749	0.151349	0.7165	[-0.07,0.48]	chr16	230	1	3911	3804	66	41	NOMO3	TAG	TAGG
742	ENST00000263025.9	-0.108017	0.0925646	0.199127	0.261777	0.0333005	0.233882	0.201645	0.336477	0.201645	0.336477	0.854469	[-0.21,0.62]	chr16	364	-1	1787	1140	11	636	MAPK3	TAG	TAGC
743	ENST00000263035.9	-0.235316	-0.225682	0.00785427	0.9665	-0.911046	-0.901413	0.0108184	0.965303	0.00785427	0.9665	0.999541	[-0.39,0.41]	chr10	45	1	5173	2760	80	2333	DHTKD1	TGA	TGAT
744	ENST00000263063.8	-0.00120066	0.14304	0.143158	0.412149	-0.559725	-0.415485	0.145597	0.512605	0.145597	0.512605	0.927676	[-0.29,0.59]	chr10	125	-1	5601	1749	44	3808	MTPAP	TGA	TGAT
745	ENST00000263102.7	-0.0657444	-0.269213	-0.204812	0.292774	-0.828403	-1.03187	-0.202866	0.418097	-0.202866	0.418097	0.904503	[-0.69,0.29]	chr10	225	-1	5727	1425	132	4170	CCDC6	TAA	TAAT
746	ENST00000263119.10	0.0124821	0.236285	0.22295	0.13366	-0.56145	-0.337647	0.224752	0.229755	0.224752	0.229755	0.7959	[-0.14,0.6]	chr22	94	1	7233	6663	138	432	CABIN1	TGA	TGAG
747	ENST00000263168.4	0.0536726	-0.155802	-0.209886	0.0334871	-0.342404	-0.551878	-0.209327	0.0837291	-0.209327	0.0837291	0.578505	[-0.45,0.03]	chr1	928	1	2358	861	13	1484	CAPZA1	TAA	TAAA
748	ENST00000263181.7	0.0822141	0.00327424	-0.0811375	0.711907	-0.594261	-0.673201	-0.0774835	0.78683	-0.0774835	0.78683	0.987263	[-0.63,0.48]	chr11	270	-1	3417	2697	139	581	KIF18A	TAA	TAAA
749	ENST00000263196.12	0.0535963	-0.221775	-0.276635	0.142346	-0.770605	-1.04598	-0.274344	0.260838	-0.274344	0.260838	0.810489	[-0.75,0.2]	chr22	19	-1	4438	1653	206	2579	DGCR2	TAG	TAGA
750	ENST00000263201.5	0.111847	0.00277894	-0.109974	0.399218	0.414715	0.305647	-0.108548	0.469996	-0.108548	0.469996	0.922714	[-0.4,0.19]	chr22	28	1	1976	1701	143	132	CDC45	TAG	TAGG
751	ENST00000263202.15	-0.055102	-0.0943762	-0.040495	0.779561	0.824933	0.785659	-0.0389441	0.805863	-0.0389441	0.805863	0.988758	[-0.35,0.27]	chr22	27	-1	1791	924	108	759	UFD1	TAA	TAAG
752	ENST00000263208.5	-0.0587931	0.0980637	0.155364	0.412011	-1.28386	-1.127	0.158247	0.536712	0.158247	0.536712	0.933437	[-0.35,0.67]	chr22	24	-1	4053	3054	257	742	HIRA	TAG	TAGC
753	ENST00000263212.10	-0.0884156	0.0810763	0.168082	0.379617	-1.35365	-1.18416	0.170912	0.505347	0.170912	0.505347	0.924114	[-0.33,0.68]	chr22	67	-1	5149	1365	117	3667	PPM1F	TAG	TAGG
754	ENST00000263228.4	-0.149807	0.72928	0.878	7.1971e-06	-1.25292	-0.37383	0.881586	0.00101227	0.881586	0.00101227	0.0458928	[0.36,1.42]	chr9	121	1	4477	717	598	3162	UBE2R2	TGA	TGAC
755	ENST00000263238.6	-0.0166119	-0.0609723	-0.0449454	0.676041	-0.187956	-0.232316	-0.044092	0.733835	-0.044092	0.733835	0.980803	[-0.3,0.21]	chr2	579	1	6718	1257	320	5141	ACTR3	TAA	TAAA
756	ENST00000263239.7	0.188262	0.0898603	-0.0989466	0.36406	-0.0529332	-0.151335	-0.0979758	0.446138	-0.0979758	0.446138	0.914444	[-0.35,0.15]	chr2	581	1	3753	2013	87	1653	DDX18	TGA	TGAA
757	ENST00000263245.10	-0.0919617	-0.102221	-0.0119879	0.945627	0.0788374	0.0685784	-0.00952044	0.96667	-0.00952044	0.96667	0.999541	[-0.44,0.42]	chr22	314	-1	2728	1551	91	1086	ARFGAP3	TAA	TAAT
758	ENST00000263253.9	-0.11169	-0.0111096	0.0995386	0.483009	0.539061	0.639642	0.101177	0.515007	0.101177	0.515007	0.927676	[-0.2,0.41]	chr22	280	1	8779	7245	413	1121	EP300	TAG	TAGA
759	ENST00000263256.7	-0.0122091	0.380045	0.391432	0.0233073	-1.90544	-1.51319	0.39433	0.106868	0.39433	0.106868	0.631135	[-0.09,0.88]	chr22	292	-1	3780	507	204	3069	DESI1	TAA	TAAC
760	ENST00000263270.10	-0.0177503	-0.0367537	-0.0199274	0.877702	0.707166	0.688162	-0.0186721	0.897802	-0.0186721	0.897802	0.989629	[-0.3,0.27]	chr19	922	-1	935	429	226	280	AP2S1	TGA	TGAG
761	ENST00000263274.12	0.0079816	-0.293096	-0.303328	0.178836	0.299667	-0.00140974	-0.300395	0.260361	-0.300395	0.260361	0.810325	[-0.82,0.22]	chr19	948	-1	3125	2760	161	204	LIG1	TAA	TAAG
762	ENST00000263280.11	-0.105816	0.0636727	0.167986	0.371915	-0.533538	-0.364049	0.171	0.470279	0.171	0.470279	0.922714	[-0.29,0.64]	chr19	919	-1	3176	2262	20	894	STRN4	TGA	TGAT
763	ENST00000263331.9	0.0380177	-0.0597145	-0.0986121	0.447287	0.0562604	-0.0414718	-0.0972467	0.531341	-0.0972467	0.531341	0.933437	[-0.4,0.21]	chr2	560	1	4558	3408	580	570	POLR1B	TAA	TAAC
764	ENST00000263346.13	-0.0908763	-0.424381	-0.335513	0.0644563	0.236076	-0.097429	-0.333272	0.108183	-0.333272	0.108183	0.634745	[-0.74,0.07]	chr16	758	1	2248	2031	76	141	TCF25	TGA	TGAG
765	ENST00000263354.8	-0.053645	-0.201032	-0.148831	0.377194	1.08431	0.936925	-0.146857	0.40829	-0.146857	0.40829	0.900473	[-0.49,0.2]	chr19	936	-1	1662	888	123	651	NAPA	TAA	TAAG
766	ENST00000263360.11	0.235826	-0.267848	-0.506389	0.021062	0.635469	0.131795	-0.503043	0.0468747	-0.503043	0.0468747	0.454791	[-1,-0.01]	chr11	824	1	2088	1326	477	285	EED	TAA	TAAA
767	ENST00000263368.8	-0.0275726	-0.242766	-0.219512	0.437736	1.46822	1.25303	-0.214289	0.444295	-0.214289	0.444295	0.914444	[-0.76,0.34]	chr19	752	-1	873	621	152	100	BLVRB	TAG	TAGC
768	ENST00000263377.6	-0.0326217	0.306244	0.336864	0.109331	1.26165	1.60051	0.339811	0.088247	0.336864	0.109331	0.636929	[-0.08,0.74]	chr19	408	-1	7169	4089	222	2858	BRD4	TGA	TGAG
769	ENST00000263382.8	0.00214191	0.166755	0.163429	0.35689	-0.237646	-0.0730336	0.165801	0.447749	0.165801	0.447749	0.916105	[-0.26,0.6]	chr19	383	-1	1689	609	133	947	ASF1B	TAA	TAAC
770	ENST00000263383.8	0.024746	0.391399	0.364685	0.0871572	0.893278	1.25993	0.368189	0.0963421	0.368189	0.0963421	0.60993	[-0.07,0.81]	chr19	405	-1	2305	1899	141	265	ILVBL	TAG	TAGG
771	ENST00000263388.7	-0.0372619	0.055495	0.0895725	0.72883	1.34961	1.44236	0.0939355	0.689117	0.0895725	0.72883	0.979833	[-0.41,0.57]	chr19	406	-1	8680	6966	90	1624	NOTCH3	TGA	TGAG
772	ENST00000263401.10	0.00760562	-0.0752526	-0.0848922	0.673496	-0.000871675	-0.08373	-0.0818413	0.739794	-0.0818413	0.739794	0.982424	[-0.56,0.4]	chr11	307	-1	2949	597	12	2340	COMMD9	TGA	TGAT
773	ENST00000263440.6	0.0957034	0.105404	0.00783728	0.967916	0.349887	0.359588	0.0110224	0.957398	0.00783728	0.967916	0.999541	[-0.37,0.38]	chr1	699	1	3325	1524	268	1533	ALG6	TAG	TAGC
774	ENST00000263461.11	0.031238	-0.223682	-0.256184	0.135545	-0.40091	-0.65583	-0.254423	0.23696	-0.254423	0.23696	0.801392	[-0.67,0.17]	chr10	612	1	4545	3675	59	811	WDR11	TGA	TGAC
775	ENST00000263556.3	-0.0308577	-0.0294562	0	0.998944	0.0446218	0.0460232	0.00260096	0.98921	0	0.998944	0.999541	[-0.38,0.38]	chr10	296	-1	2844	1605	241	998	P4HA1	TGA	TGAC
776	ENST00000263578.9	0.0653804	-0.470656	-0.538668	0.0191806	0.288757	-0.247279	-0.535449	0.047644	-0.535449	0.047644	0.460257	[-1.06,-0.01]	chr11	1100	1	1970	1461	74	435	FOXRED1	TGA	TGAG
777	ENST00000263579.5	0.0108978	0.159873	0.146614	0.50466	-0.208739	-0.0597646	0.150641	0.578079	0.150641	0.578079	0.946379	[-0.38,0.69]	chr11	1102	1	5427	1014	21	4392	DCPS	TGA	TGAA
778	ENST00000263630.13	0.0271528	-0.122044	-0.150216	0.32744	-1.10143	-1.25063	-0.148319	0.462754	-0.148319	0.462754	0.922714	[-0.54,0.25]	chr2	260	-1	9699	5532	809	3358	CCDC88A	TAA	TAAT
779	ENST00000263635.8	-0.0101502	0.110193	0.118134	0.606619	-0.496406	-0.376063	0.122502	0.672916	0.122502	0.672916	0.970985	[-0.45,0.7]	chr2	703	1	7501	5586	268	1647	TANC1	TGA	TGAA
780	ENST00000263645.9	-0.0706944	0.0780199	0.148219	0.144961	1.40376	1.55247	0.148921	0.110563	0.148219	0.144961	0.706145	[-0.05,0.34]	chr11	65	1	1520	711	256	553	CD81	TGA	TGAG
781	ENST00000263657.7	0.178181	-0.340311	-0.519806	0.00180956	0.261408	-0.257083	-0.518142	0.00857387	-0.518142	0.00857387	0.185087	[-0.9,-0.13]	chr2	301	1	2242	759	47	1436	PNO1	TGA	TGAT
782	ENST00000263663.10	0.0532313	0.119123	0.0644214	0.718913	0.374588	0.44048	0.0667289	0.742398	0.0667289	0.742398	0.982424	[-0.34,0.47]	chr2	30	1	2267	1767	68	432	TAF1B	TGA	TGAG
783	ENST00000263672.11	0.00495248	-0.123705	-0.12977	0.423105	0.391901	0.263243	-0.128001	0.497022	-0.128001	0.497022	0.923469	[-0.5,0.24]	chr11	772	1	2691	681	20	1990	SPCS2	TAG	TAGC
784	ENST00000263681.6	0.0391102	0.0310518	-0.00973548	0.961309	-0.471359	-0.479418	-0.00682955	0.981886	-0.00682955	0.981886	0.999541	[-0.52,0.51]	chr11	768	1	3821	1401	129	2291	POLD3	TAA	TAAA
785	ENST00000263694.9	0.0904042	-0.132892	-0.224049	0.076382	0.318231	0.0949339	-0.223074	0.129671	-0.223074	0.129671	0.681006	[-0.51,0.07]	chr1	391	-1	1615	1074	37	504	SNRNP40	TGA	TGAA
786	ENST00000263697.6	0.0100271	0.17167	0.161014	0.246183	-0.844829	-0.683187	0.16232	0.379243	0.16232	0.379243	0.88012	[-0.2,0.53]	chr1	369	-1	1763	762	31	970	DNAJC8	TGA	TGAC
787	ENST00000263736.5	0.165898	-0.237876	-0.406388	0.0830513	-0.099196	-0.50297	-0.402824	0.166593	-0.402824	0.166593	0.745619	[-0.97,0.17]	chr2	225	-1	3667	2988	49	630	SRBD1	TGA	TGAG
788	ENST00000263773.9	0.0135465	0.0126007	-0.00290076	0.989889	-0.839051	-0.839997	0.000660161	0.995769	0.000660161	0.995769	0.999541	[-0.55,0.56]	chr11	366	-1	3972	3054	13	905	FNBP4	TAG	TAGT
789	ENST00000263780.9	-0.0201755	-0.0296635	-0.011022	0.952061	-0.521246	-0.530734	-0.00865605	0.972804	-0.00865605	0.972804	0.999541	[-0.47,0.45]	chr3	443	1	2590	642	214	1734	CHMP2B	TAG	TAGT
790	ENST00000263791.10	-0.025616	0.225101	0.249222	0.222663	-1.23284	-0.982124	0.252753	0.362611	0.252753	0.362611	0.870763	[-0.29,0.81]	chr15	68	1	5538	4950	81	507	EIF2AK4	TAA	TAAC
791	ENST00000263795.11	0.032172	-0.214782	-0.249105	0.257285	-0.284719	-0.531672	-0.246155	0.36606	-0.246155	0.36606	0.872542	[-0.78,0.29]	chr15	145	1	3932	1881	31	2020	WDR76	TGA	TGAG
792	ENST00000263801.7	0.0258454	-0.0396159	-0.0667181	0.663846	0.384273	0.318811	-0.0650539	0.714976	-0.0650539	0.714976	0.978062	[-0.41,0.28]	chr15	134	-1	6346	5919	253	174	TP53BP1	TAA	TAAA
793	ENST00000263805.8	-0.00725212	-0.101296	-0.0952681	0.605963	-1.46255	-1.5566	-0.0928222	0.708953	-0.0928222	0.708953	0.977022	[-0.58,0.4]	chr15	117	-1	10460	5652	327	4481	ZNF106	TGA	TGAA
794	ENST00000263847.6	-0.0885689	0.0333129	0.120414	0.463911	0.121478	0.24336	0.122754	0.522206	0.122754	0.522206	0.927676	[-0.25,0.5]	chr11	454	-1	4713	2424	110	2179	OSBP	TGA	TGAA
795	ENST00000263857.11	0.00826453	-0.0617002	-0.0706383	0.588875	-0.0281761	-0.0981409	-0.0693693	0.660236	-0.0693693	0.660236	0.966916	[-0.38,0.24]	chr2	421	-1	12480	5163	110	7207	POLR1A	TAG	TAGC
796	ENST00000263918.9	-0.103212	0.0781174	0.179754	0.349125	-1.0748	-0.893466	0.183047	0.470685	0.183047	0.470685	0.922714	[-0.32,0.69]	chr2	179	-1	14174	2343	73	11758	STRN	TGA	TGAC
797	ENST00000263956.8	0.00994995	-0.0753992	-0.086652	0.588475	0.139037	0.053688	-0.0848584	0.655327	-0.0848584	0.655327	0.965801	[-0.45,0.29]	chr2	855	-1	4261	2661	72	1528	GTF3C3	TAA	TAAA
798	ENST00000263966.8	-0.0396255	-0.326781	-0.289505	0.171284	-0.390119	-0.677274	-0.286125	0.278215	-0.286125	0.278215	0.829391	[-0.8,0.23]	chr3	848	1	8038	2592	186	5260	USP13	TAA	TAAA
799	ENST00000263969.9	0.0631815	-0.205566	-0.270192	0.0993977	-0.210042	-0.47879	-0.268152	0.183203	-0.268152	0.183203	0.752562	[-0.66,0.13]	chr3	843	1	2754	2226	91	437	MFN1	TAA	TAAC
800	ENST00000264036.6	0.0162392	0.121511	0.102933	0.637346	0.0662112	0.171483	0.106853	0.678241	0.106853	0.678241	0.971444	[-0.4,0.62]	chr11	1021	-1	3327	1941	29	1357	AP002956.1	TAG	TAGC
801	ENST00000264071.7	-0.0978535	-0.160726	-0.0655883	0.821542	4.39115	4.32827	-0.0625848	0.717436	-0.0655883	0.821542	0.988946	[-0.89,0.64]	chr19	183	-1	2277	1335	97	845	TUBB4A	TAG	TAGG
802	ENST00000264093.9	0.0285725	0.205192	0.174844	0.379466	0.273274	0.449894	0.177984	0.437416	0.177984	0.437416	0.90877	[-0.27,0.63]	chr2	360	1	1075	834	31	210	DGUOK	TAA	TAAC
803	ENST00000264108.5	0.034845	-0.0953132	-0.130788	0.246924	0.947778	0.81762	-0.129969	0.280102	-0.129969	0.280102	0.830986	[-0.37,0.11]	chr2	761	1	1634	1260	40	334	HAT1	TAA	TAAA
804	ENST00000264156.3	0.0453302	-0.105404	-0.151167	0.122081	1.10373	0.952996	-0.150462	0.134456	-0.150462	0.134456	0.687007	[-0.35,0.05]	chr2	657	-1	3753	2466	78	1209	MCM6	TGA	TGAG
805	ENST00000264158.12	0.0541416	-0.150668	-0.205861	0.177416	0.010315	-0.194494	-0.204266	0.268176	-0.204266	0.268176	0.817088	[-0.56,0.16]	chr2	652	1	4914	2946	43	1925	RAB3GAP1	TGA	TGAT
806	ENST00000264161.9	0.0548029	0.0123846	-0.0429248	0.708578	0.355371	0.312953	-0.042072	0.752632	-0.042072	0.752632	0.984754	[-0.3,0.22]	chr2	658	-1	3099	1506	158	1435	DARS	TAA	TAAA
807	ENST00000264167.9	0.0440548	-0.208938	-0.253759	0.0519588	-0.421903	-0.674896	-0.252447	0.121613	-0.252447	0.121613	0.663607	[-0.57,0.07]	chr2	793	1	7633	1977	17	5639	AGPS	TAA	TAAA
808	ENST00000264183.9	0.0859717	0.436451	0.349539	0.0555521	-1.10216	-0.751677	0.352458	0.15581	0.352458	0.15581	0.723014	[-0.13,0.85]	chr1	1789	-1	6022	3939	460	1623	ARID4B	TGA	TGAC
809	ENST00000264187.7	0.0460368	0.014248	-0.0325688	0.789809	1.10012	1.06833	-0.031436	0.799132	-0.031436	0.799132	0.987569	[-0.27,0.21]	chr1	1793	-1	5792	3744	11	2037	NID1	TGA	TGAA
810	ENST00000264202.8	-0.268466	0.0283368	0.296084	0.0277752	1.04967	1.34647	0.297072	0.0256849	0.296084	0.0277752	0.342751	[0.03,0.56]	chr1	232	-1	1675	819	101	755	CAPZB	TAA	TAAA
811	ENST00000264211.12	-0.0861061	0.152226	0.237612	0.0837739	-0.716107	-0.477775	0.239093	0.174123	0.239093	0.174123	0.752267	[-0.11,0.59]	chr1	254	-1	5802	4758	195	849	EIF4G3	TAA	TAAA
812	ENST00000264220.6	0.00550601	0.0497833	0.0435375	0.725677	-0.382	-0.337723	0.0447801	0.770189	0.0447801	0.770189	0.985535	[-0.26,0.35]	chr4	223	-1	3682	1554	138	1990	PPAT	TAG	TAGC
813	ENST00000264221.6	0.0536325	-0.227198	-0.281024	5.34907e-05	0.277657	-0.00317328	-0.280836	0.00025344	-0.280836	0.00025344	0.0161783	[-0.43,-0.13]	chr4	224	1	3339	1278	231	1830	PAICS	TAA	TAAG
814	ENST00000264228.9	-0.0632312	0.233502	0.294502	0.190098	-0.605173	-0.308439	0.298802	0.302515	0.298802	0.302515	0.849297	[-0.27,0.88]	chr4	213	1	4061	957	95	3009	SRD5A3	TAA	TAAG
815	ENST00000264230.5	0.0026921	0.0426424	0.0377314	0.857486	0.000899932	0.04085	0.0414678	0.868373	0.0414678	0.868373	0.989347	[-0.46,0.55]	chr4	231	-1	2218	2097	21	100	NOA1	TGA	TGAG
816	ENST00000264255.8	0.104582	-0.0688204	-0.175636	0.438734	-0.127651	-0.301053	-0.17224	0.542432	-0.17224	0.542432	0.934419	[-0.72,0.38]	chr2	493	-1	1508	681	127	700	TXNDC9	TAG	TAGA
817	ENST00000264279.10	0.0491774	-0.0018172	-0.051323	0.656442	-0.165769	-0.216763	-0.0506516	0.722267	-0.0506516	0.722267	0.978769	[-0.33,0.23]	chr2	894	1	1994	1590	179	225	NOP58	TAA	TAAC
818	ENST00000264350.8	0.0807298	-0.210439	-0.293624	0.227023	0.369033	0.0778646	-0.290426	0.310534	-0.290426	0.310534	0.852891	[-0.85,0.27]	chr4	380	1	3511	3075	151	285	HERC5	TGA	TGAC
819	ENST00000264380.9	-0.00898099	-0.179015	-0.171544	0.430149	-1.38006	-1.5501	-0.168591	0.565861	-0.168591	0.565861	0.945217	[-0.74,0.41]	chr2	932	1	9908	6297	170	3441	PIKFYVE	TGA	TGAA
820	ENST00000264389.7	0.130433	0.15884	0.0274442	0.84734	0.439099	0.467506	0.0290302	0.854573	0.0290302	0.854573	0.988946	[-0.29,0.35]	chr4	350	1	1651	1221	42	388	COPS4	TGA	TGAA
821	ENST00000264414.9	0.0194323	0.126846	0.106595	0.405985	-0.249653	-0.142239	0.108039	0.489054	0.108039	0.489054	0.922714	[-0.2,0.42]	chr2	1030	-1	6756	2307	354	4095	CUL3	TAA	TAAA
822	ENST00000264424.12	-0.0386139	0.278581	0.314477	0.195385	0.103904	0.421098	0.319606	0.262935	0.319606	0.262935	0.812243	[-0.24,0.89]	chr4	593	1	3124	1860	82	1182	GUCY1B1	TGA	TGAA
823	ENST00000264447.9	0.120603	0.0650545	-0.0561789	0.720536	-1.07731	-1.13286	-0.0543876	0.795463	-0.0543876	0.795463	0.987349	[-0.46,0.36]	chr2	339	1	6487	5937	296	254	ZNF638	TGA	TGAT
824	ENST00000264451.12	-0.0759786	-0.00255506	0.0726555	0.628612	-1.90292	-1.82949	0.0743149	0.719707	0.0743149	0.719707	0.978285	[-0.33,0.49]	chr4	170	1	6164	1707	122	4335	SLC30A9	TGA	TGAG
825	ENST00000264499.8	0.0282671	-0.0185376	-0.0484729	0.796342	-0.164154	-0.210959	-0.0456518	0.845619	-0.0456518	0.845619	0.988946	[-0.5,0.41]	chr4	493	-1	3752	2148	184	1420	BBS7	TGA	TGAC
826	ENST00000264515.11	-0.0519028	-0.123982	-0.0738262	0.68692	-0.141222	-0.213301	-0.0711395	0.750607	-0.0711395	0.750607	0.984258	[-0.51,0.37]	chr1	1595	-1	4367	1617	105	2645	RBBP5	TGA	TGAA
827	ENST00000264538.4	-0.0112688	0.424491	0.434618	0.0375309	-1.47668	-1.04092	0.438754	0.133339	0.438754	0.133339	0.686328	[-0.13,1.02]	chr3	498	-1	3057	1290	102	1665	IFT57	TAA	TAAA
828	ENST00000264552.14	-0.0382671	0.208568	0.245991	0.0445905	-0.15182	0.0950152	0.247434	0.0820887	0.247434	0.0820887	0.572122	[-0.03,0.53]	chr19	1190	-1	2559	669	199	1691	UBE2S	TAG	TAGT
829	ENST00000264596.4	0.0841018	-0.0524608	-0.138929	0.548409	0.246319	0.109757	-0.13532	0.628233	-0.13532	0.628233	0.956593	[-0.68,0.41]	chr4	656	1	2363	1818	80	465	NEIL3	TAA	TAAT
830	ENST00000264639.9	0.051255	-0.217954	-0.269884	0.010647	0.552432	0.283223	-0.269159	0.0231043	-0.269159	0.0231043	0.310248	[-0.5,-0.04]	chr17	477	1	2147	1605	164	378	PSMD3	TGA	TGAG
831	ENST00000264645.12	0.00310685	0.111581	0.107494	0.473362	-0.89253	-0.784056	0.109446	0.575975	0.109446	0.575975	0.946379	[-0.28,0.5]	chr17	483	1	3890	2112	12	1766	CASC3	TAA	TAAT
832	ENST00000264670.11	0.0709833	0.109939	0.0383297	0.74179	0.0568085	0.0957645	0.0395192	0.775059	0.0395192	0.775059	0.98647	[-0.23,0.31]	chr5	29	-1	3056	2304	65	687	NSUN2	TGA	TGAG
833	ENST00000264705.9	0.00865629	-0.388856	-0.39845	0.00158966	0.935353	0.537841	-0.39749	0.00292295	-0.39749	0.00292295	0.0935958	[-0.66,-0.14]	chr2	121	1	7286	6678	183	425	CAD	TAG	TAGG
834	ENST00000264710.5	-0.0942932	0.221252	0.314871	0.0350728	-1.24844	-0.93289	0.316445	0.114889	0.316445	0.114889	0.645324	[-0.08,0.71]	chr2	94	1	3561	603	525	2433	RAB10	TGA	TGAG
835	ENST00000264720.7	-0.0373964	-0.0746355	-0.0383762	0.800634	-0.35401	-0.391249	-0.0364439	0.846931	-0.0364439	0.846931	0.988946	[-0.41,0.33]	chr2	127	-1	3882	2736	320	826	GTF3C2	TAG	TAGC
836	ENST00000264758.11	-0.0347984	-0.0326519	0.00108075	0.992814	-0.157639	-0.155493	0.00280178	0.984827	0.00108075	0.992814	0.999541	[-0.28,0.28]	chr4	41	1	4045	2307	188	1550	ADD1	TGA	TGAA
837	ENST00000264883.8	0.0780711	0.015505	-0.0639449	0.700074	-0.0281324	-0.0906987	-0.0615896	0.761599	-0.0615896	0.761599	0.984929	[-0.46,0.34]	chr4	318	-1	2249	1524	23	702	NUP54	TGA	TGAC
838	ENST00000264896.8	-0.0710713	0.150671	0.220376	0.217048	-0.931236	-0.709494	0.222856	0.339341	0.222856	0.339341	0.856058	[-0.24,0.69]	chr4	319	-1	4694	1437	281	2976	SCARB2	TAA	TAAA
839	ENST00000264926.7	0.153543	0.243262	0.0874358	0.698568	-0.825097	-0.735378	0.0925887	0.757626	0.0925887	0.757626	0.984754	[-0.5,0.7]	chr3	18	-1	5857	1488	87	4282	RAD18	TAA	TAAT
840	ENST00000264932.11	-0.0820545	-0.336283	-0.255054	0.0408796	0.57034	0.316111	-0.254181	0.0658636	-0.254181	0.0658636	0.524453	[-0.52,0.02]	chr5	3	1	2693	1995	36	662	SDHA	TGA	TGAT
841	ENST00000264951.8	0.0749918	-0.196264	-0.272861	0.157083	-0.205048	-0.476303	-0.270307	0.261077	-0.270307	0.261077	0.810489	[-0.74,0.2]	chr3	717	-1	10143	5121	118	4904	XRN1	TAA	TAAA
842	ENST00000264954.5	-0.0507941	-0.116744	-0.0669587	0.620343	0.155812	0.0898626	-0.0656271	0.679318	-0.0656271	0.679318	0.972061	[-0.38,0.25]	chr4	75	-1	2653	654	32	1967	GRPEL1	TAG	TAGC
843	ENST00000264990.11	-0.0187331	-0.189421	-0.173167	0.443304	-0.276953	-0.447641	-0.169477	0.547137	-0.169477	0.547137	0.936927	[-0.72,0.38]	chr3	661	-1	3231	2343	58	830	ACAD11	TAA	TAAG
844	ENST00000264995.8	-0.0247718	0.0920995	0.11655	0.232407	-0.139238	-0.0223672	0.117109	0.315278	0.117109	0.315278	0.852891	[-0.11,0.35]	chr3	657	-1	1708	1047	150	511	MRPL3	TAA	TAAC
845	ENST00000265000.9	0.0408167	-0.0145507	-0.0573883	0.791659	-0.217764	-0.273132	-0.0538015	0.845363	-0.0538015	0.845363	0.988946	[-0.59,0.48]	chr4	640	1	4249	1974	25	2250	GALNT7	TAG	TAGA
846	ENST00000265028.7	0.00197574	0.332393	0.329421	0.0243186	0.0435703	0.373987	0.331293	0.0531921	0.331293	0.0531921	0.47852	[0,0.67]	chr3	899	1	1688	1077	220	391	DNAJB11	TGA	TGAG
847	ENST00000265036.10	-0.00668403	0.352141	0.356912	0.0812847	-0.855429	-0.496604	0.360771	0.18303	0.360771	0.18303	0.752562	[-0.17,0.9]	chr5	168	-1	2504	1590	73	841	DEPDC1B	TAA	TAAT
848	ENST00000265044.6	0.0429729	-0.0694553	-0.112819	0.255586	-0.875531	-0.987959	-0.112034	0.374772	-0.112034	0.374772	0.878346	[-0.36,0.14]	chr3	778	-1	3716	558	95	3063	SSR3	TAG	TAGA
849	ENST00000265056.12	0.0485567	-0.0972951	-0.146147	0.106102	0.739928	0.594077	-0.145692	0.145595	-0.145692	0.145595	0.70773	[-0.34,0.05]	chr3	622	1	3434	2715	56	663	MCM2	TGA	TGAG
850	ENST00000265062.7	-0.082215	-0.133695	-0.0521855	0.68255	0.999831	0.94835	-0.0513318	0.701708	-0.0513318	0.701708	0.977022	[-0.31,0.21]	chr3	633	1	2244	624	246	1374	RAB7A	TGA	TGAG
851	ENST00000265069.13	0.0492096	0.0363001	-0.0135594	0.907682	-0.452903	-0.465813	-0.0125316	0.932702	-0.0125316	0.932702	0.995269	[-0.3,0.28]	chr5	69	-1	4717	3225	82	1410	ZFR	TAA	TAAA
852	ENST00000265070.7	-0.0674845	0.292769	0.359173	0.063918	-1.37887	-1.01861	0.362162	0.171931	0.362162	0.171931	0.752267	[-0.16,0.89]	chr5	67	-1	2678	897	285	1496	GOLPH3	TAA	TAAC
853	ENST00000265077.8	0.0643862	0.0646208	-0.000520099	0.994571	0.86683	0.867065	0.000560103	0.994164	-0.000520099	0.994571	0.999541	[-0.24,0.24]	chr5	278	1	12345	10191	286	1868	VCAN	TGA	TGAT
854	ENST00000265081.7	0.0155892	-0.108682	-0.126519	0.556438	-0.289383	-0.413654	-0.12311	0.648982	-0.12311	0.648982	0.964659	[-0.65,0.41]	chr5	267	1	4443	3414	76	953	MSH3	TAA	TAAA
855	ENST00000265087.8	-0.142659	-0.00262457	0.138703	0.389494	-0.371119	-0.231085	0.140631	0.465167	0.140631	0.465167	0.922714	[-0.24,0.52]	chr5	685	-1	5353	909	1310	3134	STC2	TGA	TGAA
856	ENST00000265094.9	-0.0241521	0.368246	0.391578	0.0198447	-1.79247	-1.40007	0.394303	0.0970551	0.394303	0.0970551	0.611029	[-0.07,0.87]	chr5	672	-1	4342	1629	138	2575	FBXW11	TAA	TAAC
857	ENST00000265097.8	-0.000724678	0.293074	0.293321	0.0174134	-0.0425251	0.251274	0.294425	0.0469789	0.294425	0.0469789	0.454791	[0,0.59]	chr5	695	-1	1589	1056	91	442	THOC3	TGA	TGAG
858	ENST00000265107.8	0.0156275	-0.0299699	-0.0483696	0.842692	0.173693	0.128096	-0.0438162	0.882651	-0.0438162	0.882651	0.989347	[-0.61,0.53]	chr5	98	1	2983	1965	156	862	WDR70	TGA	TGAA
859	ENST00000265113.9	0.0110306	0.0437954	0.0314318	0.846379	0.0823413	0.115106	0.0336924	0.858791	0.0336924	0.858791	0.989181	[-0.34,0.41]	chr5	94	1	3919	1629	225	2065	SLC1A3	TAG	TAGA
860	ENST00000265148.7	0.107588	-0.089361	-0.197591	0.108524	-0.226159	-0.423108	-0.196632	0.19252	-0.196632	0.19252	0.758005	[-0.49,0.1]	chr4	428	-1	8612	8106	90	416	CENPE	TAG	TAGA
861	ENST00000265174.5	-0.0424768	-0.149748	-0.109087	0.555606	0.569483	0.462211	-0.106395	0.610886	-0.106395	0.610886	0.954353	[-0.52,0.3]	chr4	441	-1	2513	1875	55	583	PAPSS1	TAG	TAGG
862	ENST00000265195.9	0.0122021	0.313834	0.297582	0.305139	0.910123	1.21176	0.304509	0.308459	0.304509	0.308459	0.85268	[-0.28,0.9]	chr5	465	-1	1895	1386	146	363	SIL1	TGA	TGAG
863	ENST00000265245.10	0.00119372	-0.0351297	-0.037558	0.830899	-0.535125	-0.571448	-0.0352578	0.875369	-0.0352578	0.875369	0.989347	[-0.47,0.4]	chr3	939	-1	3283	1977	29	1277	LSG1	TGA	TGAG
864	ENST00000265260.7	0.00766343	0.0692909	0.0610198	0.669016	-1.61953	-1.5579	0.062469	0.745976	0.062469	0.745976	0.982424	[-0.32,0.45]	chr3	486	1	2342	537	121	1684	PCNP	TAA	TAAA
865	ENST00000265295.9	0.0210042	-0.0460298	-0.0676344	0.585303	-0.517461	-0.584495	-0.0665737	0.669531	-0.0665737	0.669531	0.970985	[-0.37,0.24]	chr5	658	1	2529	1818	140	571	SPDL1	TAA	TAAA
866	ENST00000265339.6	-0.0798887	0.291183	0.36845	0.13394	-0.0974393	0.273632	0.373751	0.2129	0.373751	0.2129	0.776786	[-0.22,0.97]	chr5	423	1	2515	459	417	1639	UBE2B	TAA	TAAT
867	ENST00000265343.10	-0.00205957	-0.0349595	-0.0338666	0.829871	-0.889727	-0.922627	-0.0319702	0.876839	-0.0319702	0.876839	0.989347	[-0.43,0.37]	chr5	413	-1	9536	3492	380	5664	AFF4	TGA	TGAA
868	ENST00000265351.12	0.060354	-0.0653967	-0.1263	0.252502	0.451012	0.325262	-0.125397	0.317956	-0.125397	0.317956	0.852891	[-0.37,0.12]	chr6	439	-1	5323	3615	174	1534	XPO5	TGA	TGAA
869	ENST00000265388.9	0.0558002	0.0217221	-0.0348936	0.810859	-0.565162	-0.59924	-0.0334862	0.85796	-0.0334862	0.85796	0.988946	[-0.4,0.33]	chr7	632	-1	4153	2772	144	1237	TNPO3	TAG	TAGC
870	ENST00000265395.7	-0.187513	0.21	0.39557	0.0530359	-0.444464	-0.0469515	0.39916	0.115712	0.39916	0.115712	0.646939	[-0.1,0.9]	chr7	139	-1	1878	1011	95	772	HIBADH	TGA	TGAG
871	ENST00000265433.7	0.0494874	-0.0933521	-0.144022	0.381769	-1.13994	-1.28278	-0.141874	0.515301	-0.141874	0.515301	0.927676	[-0.57,0.29]	chr8	373	-1	4666	2265	155	2246	NBN	TAA	TAAC
872	ENST00000265462.9	-0.138269	0.236601	0.37409	0.00213419	0.0178237	0.392694	0.375323	0.00818742	0.375323	0.00818742	0.179497	[0.1,0.66]	chr11	578	1	860	645	95	120	PRDX5	TGA	TGAG
873	ENST00000265465.8	-0.0170412	0.236007	0.252098	0.0827223	-0.191132	0.0619163	0.253746	0.153695	0.253746	0.153695	0.721074	[-0.1,0.61]	chr11	609	1	3544	1797	331	1416	POLA2	TGA	TGAG
874	ENST00000265498.6	-0.0837695	0.209449	0.290146	0.294852	0.748441	1.04166	0.295405	0.325194	0.295405	0.325194	0.853516	[-0.29,0.89]	chr4	528	1	740	444	201	95	MGST2	TAA	TAAC
875	ENST00000265523.9	0.132065	-0.444733	-0.579139	0.0042542	1.23515	0.658352	-0.576235	0.00658781	-0.576235	0.00658781	0.161313	[-0.99,-0.16]	chr7	199	1	1074	891	76	107	BLVRA	TAA	TAAG
876	ENST00000265562.5	0.0829856	0.127134	0.0377695	0.945663	2.17649	2.22064	0.0463672	0.871762	0.0377695	0.945663	0.995968	[-0.74,0.74]	chr3	246	1	5237	4911	76	250	PTPN23	TGA	TGAA
877	ENST00000265564.8	0.110376	-0.0630438	-0.175579	0.405984	0.513225	0.339805	-0.172236	0.481027	-0.172236	0.481027	0.922714	[-0.65,0.31]	chr3	213	1	1042	876	34	132	EXOSC7	TGA	TGAT
878	ENST00000265631.9	0.00941753	-0.00888155	-0.0191789	0.895004	-0.181005	-0.199304	-0.0176823	0.923285	-0.0176823	0.923285	0.993589	[-0.37,0.34]	chr7	410	-1	3136	2028	137	971	SLC25A13	TAG	TAGG
879	ENST00000265643.4	0.0489221	-0.054192	-0.10464	0.552921	0.948273	0.845159	-0.102424	0.589576	-0.102424	0.589576	0.949856	[-0.47,0.27]	chr11	705	1	749	372	189	188	GAL	TGA	TGAG
880	ENST00000265651.8	-0.0694278	-0.263792	-0.195896	0.276152	0.605141	0.410777	-0.193811	0.335982	-0.193811	0.335982	0.854469	[-0.59,0.2]	chr11	291	-1	2403	1416	23	964	FBXO3	TAG	TAGC
881	ENST00000265689.9	-0.0491889	0.0659718	0.11253	0.638869	0.0061642	0.121325	0.116878	0.680589	0.116878	0.680589	0.972665	[-0.44,0.69]	chr11	700	-1	2714	1374	211	1129	CHKA	TGA	TGAC
882	ENST00000265724.7	0.0229991	-0.114705	-0.140588	0.544182	0.901183	0.763479	-0.136571	0.589862	-0.136571	0.589862	0.949856	[-0.63,0.36]	chr7	362	-1	4645	3843	418	384	ABCB1	TGA	TGAA
883	ENST00000265728.6	0.0431342	0.641169	0.597182	0.00624676	-1.95626	-1.35823	0.601796	0.0589206	0.601796	0.0589206	0.494803	[-0.02,1.24]	chr7	365	1	3655	2025	240	1390	DBF4	TAG	TAGA
884	ENST00000265729.6	-0.0598484	-0.108683	-0.0497121	0.721016	0.227252	0.178417	-0.0485344	0.767854	-0.0485344	0.767854	0.985535	[-0.37,0.27]	chr7	367	-1	2010	597	53	1360	SRI	TAA	TAAA
885	ENST00000265734.8	-0.0423944	-0.153314	-0.111429	0.521926	-2.18387	-2.29479	-0.109947	0.647038	-0.109947	0.647038	0.964659	[-0.58,0.36]	chr7	389	-1	11612	981	412	10219	CDK6	TGA	TGAG
886	ENST00000265748.7	0.04127	-0.392691	-0.435011	0.00122953	0.104677	-0.329283	-0.433664	0.00618466	-0.433664	0.00618466	0.154752	[-0.74,-0.12]	chr7	179	1	4731	3375	165	1191	ANLN	TAA	TAAA
887	ENST00000265753.12	0.000441357	-0.0998216	-0.100771	0.28966	-0.875861	-0.976124	-0.0999197	0.401928	-0.0999197	0.401928	0.896458	[-0.33,0.13]	chr7	308	1	2679	747	139	1793	EIF4H	TGA	TGAG
888	ENST00000265758.6	-0.0736726	-0.0126516	0.060002	0.66317	0.472126	0.533147	0.0616123	0.686348	0.0616123	0.686348	0.973904	[-0.24,0.36]	chr7	299	1	1230	846	58	326	BUD23	TAA	TAAG
889	ENST00000265838.8	0.00894163	-0.127556	-0.136985	0.211355	1.01987	0.883372	-0.136224	0.237139	-0.136224	0.237139	0.801392	[-0.36,0.09]	chr11	914	1	1761	1284	91	386	ACAT1	TAG	TAGA
890	ENST00000265857.8	-0.0256548	0.117645	0.141393	0.510344	0.598977	0.742277	0.144695	0.540637	0.144695	0.540637	0.933757	[-0.32,0.61]	chr7	5	1	2090	984	92	1014	GET4	TGA	TGAA
891	ENST00000265866.11	-0.125999	0.0283452	0.153708	0.186086	0.282375	0.43672	0.154823	0.227041	0.154823	0.227041	0.794209	[-0.1,0.41]	chr10	247	1	2339	1041	165	1133	HNRNPH3	TGA	TGAA
892	ENST00000265872.11	0.0366718	-0.0389548	-0.0762117	0.521818	-0.305608	-0.381234	-0.0753469	0.608357	-0.0753469	0.608357	0.954236	[-0.36,0.21]	chr10	252	1	4658	3453	94	1111	CCAR1	TGA	TGAT
893	ENST00000265896.10	0.00537555	0.280053	0.274354	0.00370625	-0.197279	0.0773985	0.274984	0.0153226	0.274984	0.0153226	0.253994	[0.05,0.5]	chr8	500	1	2962	1725	899	338	SQLE	TAA	TAAG
894	ENST00000265986.10	0.00928791	-0.0638937	-0.0743608	0.647798	-0.133974	-0.207156	-0.0724728	0.718084	-0.0724728	0.718084	0.978285	[-0.46,0.32]	chr10	403	-1	5877	3060	57	2760	IDE	TGA	TGAA
895	ENST00000265990.11	-0.0393505	-0.159436	-0.12115	0.455358	-1.21199	-1.33208	-0.11943	0.577903	-0.11943	0.577903	0.946379	[-0.54,0.3]	chr10	400	1	7249	5550	307	1392	BTAF1	TAA	TAAC
896	ENST00000266025.4	-0.0181707	0.457828	0.47436	0.02405	-0.626487	-0.150489	0.478717	0.0759841	0.478717	0.0759841	0.554914	[-0.05,1.02]	chr3	320	-1	2107	1056	458	593	TMEM115	TAA	TAAC
897	ENST00000266069.5	-0.0730633	0.0754835	0.147178	0.473662	-0.8952	-0.746654	0.150476	0.576965	0.150476	0.576965	0.946379	[-0.38,0.69]	chr20	439	1	4369	687	119	3563	GID8	TAG	TAGC
898	ENST00000266085.6	-0.0360426	-0.044109	-0.0102764	0.959271	-0.132834	-0.1409	-0.00697038	0.980636	-0.00697038	0.980636	0.999541	[-0.51,0.5]	chr22	187	1	4603	636	301	3666	TIMP3	TGA	TGAG
899	ENST00000266087.12	-0.016501	-0.0356981	-0.0198618	0.892464	-0.273923	-0.29312	-0.0187159	0.918352	-0.0187159	0.918352	0.992011	[-0.37,0.34]	chr22	185	1	2060	1569	192	299	FBXO7	TGA	TGAT
900	ENST00000266126.10	0.127865	-0.189296	-0.31907	0.0758099	0.536288	0.219128	-0.316685	0.123597	-0.316685	0.123597	0.66818	[-0.72,0.09]	chr14	369	1	4304	1056	70	3178	EIF2B2	TGA	TGAC
901	ENST00000266517.8	0.0220827	0.283488	0.26067	0.0627643	-0.79148	-0.530075	0.262529	0.149507	0.262529	0.149507	0.713938	[-0.09,0.62]	chr12	213	1	7159	1359	89	5711	ETNK1	TAA	TAAA
902	ENST00000266546.10	-0.108965	0.0724878	0.178044	0.509374	0.84412	1.02557	0.182983	0.500088	0.178044	0.509374	0.927037	[-0.35,0.69]	chr12	85	1	4185	2871	450	864	CLSTN3	TAA	TAAG
903	ENST00000266682.10	0.0642909	-0.118574	-0.183708	0.18392	0.381417	0.198552	-0.182386	0.258228	-0.182386	0.258228	0.809928	[-0.5,0.13]	chr12	627	-1	4799	2193	465	2141	SLC6A15	TAG	TAGC
904	ENST00000266712.11	-0.0196687	-0.313755	-0.295213	0.0489574	-0.648072	-0.942159	-0.293745	0.121736	-0.293745	0.121736	0.663607	[-0.66,0.08]	chr12	637	1	7192	2745	209	4238	TMTC3	TAA	TAAC
905	ENST00000266970.9	-0.0286052	0.102272	0.130125	0.395095	-0.655679	-0.524801	0.131672	0.500372	0.131672	0.500372	0.923469	[-0.25,0.52]	chr12	470	1	2240	897	179	1164	CDK2	TGA	TGAT
906	ENST00000267064.8	-0.0671734	0.0473647	0.113141	0.50977	0.274752	0.38929	0.11521	0.554807	0.11521	0.554807	0.93958	[-0.27,0.5]	chr12	480	-1	4076	3645	87	344	SMARCC2	TGA	TGAG
907	ENST00000267103.10	0.0313304	-0.0533659	-0.0869563	0.678037	0.892661	0.807965	-0.0835066	0.716783	-0.0835066	0.716783	0.978285	[-0.53,0.37]	chr12	413	1	1202	1131	43	28	C12orf10	TAG	TAGT
908	ENST00000267116.8	-0.110321	0.233349	0.34275	0.0563452	0.124425	0.468095	0.345103	0.106557	0.345103	0.106557	0.631135	[-0.07,0.77]	chr12	484	-1	8681	3231	115	5335	ANKRD52	TAG	TAGC
909	ENST00000267163.5	-0.0347343	-0.0471592	-0.0139024	0.935673	0.179643	0.167218	-0.011551	0.956995	-0.011551	0.956995	0.99787	[-0.42,0.4]	chr13	145	1	4793	2787	187	1819	RB1	TGA	TGAG
910	ENST00000267176.8	0.0243785	0.240274	0.215223	0.106308	-0.973913	-0.758018	0.21688	0.215572	0.21688	0.215572	0.780814	[-0.13,0.56]	chr12	890	-1	11121	4179	143	6799	SBNO1	TGA	TGAA
911	ENST00000267199.8	-0.00457112	0.179459	0.183094	0.213819	0.0818008	0.265831	0.184878	0.283015	0.184878	0.283015	0.833928	[-0.15,0.53]	chr12	871	-1	4586	1791	113	2682	VPS33A	TAG	TAGG
912	ENST00000267229.11	0.00500515	-0.0288791	-0.034606	0.78942	-0.33937	-0.373254	-0.0334351	0.836533	-0.0334351	0.836533	0.988946	[-0.35,0.28]	chr13	208	-1	3624	2943	14	667	RBM26	TGA	TGAT
913	ENST00000267430.10	0.0537666	-0.120395	-0.175981	0.437828	-0.635833	-0.809995	-0.172758	0.555974	-0.172758	0.555974	0.939627	[-0.74,0.4]	chr14	182	1	7131	6147	102	882	FANCM	TAA	TAAT
914	ENST00000267622.8	-0.0130708	-0.0271331	-0.0157209	0.940052	-0.73302	-0.747083	-0.0124294	0.964144	-0.0124294	0.964144	0.999541	[-0.54,0.52]	chr14	435	-1	9996	5940	374	3682	TRIP11	TAG	TAGA
915	ENST00000267812.4	0.162979	-0.24296	-0.407584	0.0390124	0.662967	0.257028	-0.405063	0.0741664	-0.405063	0.0741664	0.551833	[-0.85,0.04]	chr15	144	-1	2043	1320	121	602	MFAP1	TAG	TAGG
916	ENST00000267814.14	0.086608	0.00870044	-0.0795324	0.660447	-0.22158	-0.299487	-0.0770652	0.734273	-0.0770652	0.734273	0.981102	[-0.52,0.37]	chr15	155	1	4818	1074	89	3655	SORD	TGA	TGAT
917	ENST00000267884.10	0.00574306	-0.0698952	-0.0762633	0.507675	0.715609	0.639971	-0.0754605	0.533779	-0.0754605	0.533779	0.933437	[-0.31,0.16]	chr15	69	-1	1077	411	72	594	SRP14	TAA	TAAA
918	ENST00000267935.12	0.00557503	0.122546	0.11572	0.443792	0.641299	0.75827	0.117521	0.47603	0.117521	0.47603	0.922714	[-0.21,0.44]	chr15	368	1	1067	600	199	268	COMMD4	TGA	TGAG
919	ENST00000267970.8	-0.123549	0.266327	0.389556	0.000112735	-0.914632	-0.524756	0.39048	0.00258237	0.39048	0.00258237	0.085686	[0.14,0.65]	chr15	387	-1	6467	762	274	5431	TSPAN3	TAG	TAGT
920	ENST00000267973.7	0.0489626	-0.0369041	-0.0871554	0.557764	0.848686	0.762819	-0.0855207	0.597635	-0.0855207	0.597635	0.952693	[-0.4,0.23]	chr15	397	-1	1202	918	87	197	WDR61	TAA	TAAA
921	ENST00000268035.10	0.0697896	-0.200051	-0.271277	0.130293	-0.516079	-0.78592	-0.269316	0.235373	-0.269316	0.235373	0.801392	[-0.71,0.18]	chr15	501	1	11803	4104	611	7088	IGF1R	TGA	TGAT
922	ENST00000268097.9	0.0363452	0.06503	0.0270663	0.879439	0.327074	0.355758	0.0296265	0.881815	0.0296265	0.881815	0.989347	[-0.37,0.43]	chr15	327	-1	5252	1590	504	3158	HEXA	TGA	TGAG
923	ENST00000268099.13	-0.0267482	0.0466182	0.0720518	0.676001	0.565861	0.639227	0.0739366	0.693617	0.0739366	0.693617	0.97424	[-0.3,0.45]	chr15	360	-1	2453	990	110	1353	SCAMP2	TAG	TAGT
924	ENST00000268138.11	-0.100877	0.547323	0.646643	0.000856882	-0.908439	-0.260239	0.650259	0.0115486	0.650259	0.0115486	0.216725	[0.14,1.17]	chr15	465	1	6775	5733	105	937	TICRR	TAG	TAGC
925	ENST00000268182.10	-0.126756	-0.436468	-0.311781	0.143508	-0.178212	-0.487924	-0.309497	0.232242	-0.309497	0.232242	0.798375	[-0.82,0.2]	chr15	480	1	7205	4974	100	2131	IQGAP1	TAA	TAAT
926	ENST00000268482.8	0.0381757	-0.332831	-0.372117	0.0346573	-0.358064	-0.729071	-0.370377	0.0947433	-0.370377	0.0947433	0.605907	[-0.8,0.06]	chr16	641	1	4323	3684	224	415	DHX38	TGA	TGAG
927	ENST00000268607.9	-0.04489	-0.329311	-0.286228	0.112796	0.387456	0.103035	-0.283892	0.167083	-0.283892	0.167083	0.745686	[-0.69,0.12]	chr16	719	1	2688	378	628	1682	MAP1LC3B	TAA	TAAA
928	ENST00000268668.11	-0.0187266	0.152935	0.171251	0.0763725	0.551807	0.723469	0.172061	0.105171	0.172061	0.105171	0.630366	[-0.04,0.38]	chr16	76	1	675	519	87	69	NDUFB10	TGA	TGAG
929	ENST00000268712.8	0.0371207	0.0128187	-0.0253483	0.870087	-1.17104	-1.19534	-0.0235863	0.909222	-0.0235863	0.909222	0.989683	[-0.42,0.38]	chr17	238	-1	10705	7323	243	3139	NCOR1	TGA	TGAA
930	ENST00000268717.10	0.0205649	0.123223	0.102171	0.378759	0.116426	0.219084	0.103019	0.449204	0.103019	0.449204	0.916324	[-0.16,0.37]	chr17	251	-1	1814	1272	60	482	COPS3	TGA	TGAA
931	ENST00000268802.10	0.001801	-0.15911	-0.162414	0.327376	0.374089	0.213178	-0.160498	0.39902	-0.160498	0.39902	0.895855	[-0.53,0.21]	chr16	610	-1	1716	1239	16	461	NOB1	TGA	TGAA
932	ENST00000268835.7	-0.0349848	0.246421	0.280032	0.115285	-0.115724	0.165681	0.282554	0.191242	0.282554	0.191242	0.758005	[-0.14,0.71]	chr17	277	1	1958	1110	259	589	PRPSAP2	TGA	TGAG
933	ENST00000269097.8	-0.11872	-0.203864	-0.0872136	0.668686	1.96783	1.88268	-0.0845709	0.6483	-0.0872136	0.668686	0.970804	[-0.51,0.32]	chr17	623	1	1533	1041	231	261	G6PC3	TGA	TGAC
934	ENST00000269122.7	0.0738588	0.0859734	0.0119612	0.882829	0.687313	0.699427	0.0122751	0.878921	0.0119612	0.882829	0.989347	[-0.15,0.17]	chr17	796	1	7760	5028	274	2458	CLTC	TGA	TGAG
935	ENST00000269141.8	0.0261314	-0.0825211	-0.109376	0.36922	0.614149	0.505497	-0.108192	0.421017	-0.108192	0.421017	0.90452	[-0.37,0.16]	chr18	88	-1	4016	2721	108	1187	CDH2	TGA	TGAA
936	ENST00000269143.7	-0.0763462	0.142762	0.217857	0.166919	-0.56033	-0.341221	0.219892	0.263754	0.219892	0.263754	0.813287	[-0.17,0.61]	chr18	45	-1	3247	2394	232	621	AFG3L2	TAG	TAGA
937	ENST00000269195.5	-0.0558713	0.403199	0.458315	0.00159003	-2.06104	-1.60197	0.460421	0.025387	0.460421	0.025387	0.325349	[0.06,0.87]	chr18	114	1	3847	1680	103	2064	GALNT1	TGA	TGAG
938	ENST00000269221.7	-0.124009	0.0709157	0.192618	0.362793	-0.17866	0.016264	0.196399	0.445947	0.196399	0.445947	0.914444	[-0.31,0.71]	chr18	72	1	2162	1974	110	78	RMC1	TGA	TGAA
939	ENST00000269228.10	-0.0675006	-0.0803428	-0.0144477	0.928362	1.05659	1.04375	-0.0124411	0.945882	-0.0124411	0.945882	0.995968	[-0.36,0.34]	chr18	73	-1	4760	3837	163	760	NPC1	TAG	TAGC
940	ENST00000269243.8	-0.0472168	-0.206726	-0.15982	0.0837944	0.260973	0.101465	-0.159283	0.131107	-0.159283	0.131107	0.683093	[-0.37,0.05]	chr17	194	-1	7662	5931	139	1592	MYH10	TAA	TAAA
941	ENST00000269260.7	-0.116884	0.257838	0.373084	0.0814567	-0.902588	-0.527866	0.376673	0.179435	0.376673	0.179435	0.752562	[-0.17,0.94]	chr17	70	1	1778	1230	90	458	ARRB2	TAG	TAGG
942	ENST00000269383.8	-0.0337813	-0.127116	-0.0944948	0.644604	-0.88555	-0.978885	-0.0920186	0.730565	-0.0920186	0.730565	0.980615	[-0.61,0.43]	chr17	940	-1	3384	1554	14	1816	TRIM65	TGA	TGAA
943	ENST00000269518.9	-0.0175568	0.15883	0.175042	0.388962	-1.19316	-1.01678	0.178238	0.516903	0.178238	0.516903	0.927676	[-0.36,0.73]	chr18	189	1	1262	411	162	689	PMAIP1	TGA	TGAG
944	ENST00000269601.10	-0.0410827	0.556112	0.596061	0.000214005	-1.18373	-0.586534	0.59896	0.00591273	0.59896	0.00591273	0.150413	[0.17,1.03]	chr18	241	-1	3472	429	171	2872	TXNL4A	TGA	TGAG
945	ENST00000269886.7	-0.035143	0.468457	0.502444	0.0016144	-0.417522	0.0860776	0.505121	0.0110623	0.505121	0.0110623	0.213843	[0.12,0.9]	chr19	135	-1	2516	1107	179	1230	SH3GL1	TGA	TGAC
946	ENST00000269932.10	0.0168414	-0.153046	-0.1714	0.331427	0.438783	0.268895	-0.169132	0.403185	-0.169132	0.403185	0.89725	[-0.56,0.23]	chr19	504	1	2412	1431	450	531	ARMC6	TGA	TGAC
947	ENST00000269967.4	-0.0764232	-0.0812093	-0.00832705	0.968198	0.510704	0.505918	-0.00280219	0.993552	-0.00280219	0.993552	0.999541	[-0.59,0.59]	chr19	772	1	3329	1032	139	2158	CCDC97	TGA	TGAT
948	ENST00000269980.7	-0.00346572	-0.457176	-0.456968	0.0648446	1.13467	0.680964	-0.453468	0.0811638	-0.453468	0.0811638	0.571698	[-0.96,0.06]	chr19	775	1	1742	1338	10	394	BCKDHA	TGA	TGAG
949	ENST00000270142.10	0.0599135	-0.141425	-0.201555	0.0108708	0.471988	0.270649	-0.201155	0.0217779	-0.201155	0.0217779	0.302185	[-0.37,-0.03]	chr21	78	1	966	465	148	353	SOD1	TAA	TAAA
950	ENST00000270176.10	0.0857096	-0.0515435	-0.138292	0.384024	0.00801385	-0.129239	-0.136637	0.474902	-0.136637	0.474902	0.922714	[-0.51,0.24]	chr11	615	1	2636	2427	71	138	SCYL1	TGA	TGAA
951	ENST00000270538.8	0.023361	0.132262	0.107506	0.500366	0.171361	0.280261	0.109888	0.555658	0.109888	0.555658	0.93958	[-0.26,0.48]	chr19	224	-1	1843	1359	15	469	TIMM44	TGA	TGAG
952	ENST00000270586.8	-0.0370763	-0.0356335	0.000960673	0.99442	0.933611	0.935053	0.00168118	0.98636	0.000960673	0.99442	0.999541	[-0.21,0.21]	chr17	77	1	824	720	31	73	PSMB6	TGA	TGAA
953	ENST00000270625.7	-0.0261464	-0.125831	-0.0997814	0.132424	-0.515869	-0.615553	-0.0996115	0.195956	-0.0996115	0.195956	0.758909	[-0.25,0.05]	chr19	1010	1	573	477	23	73	RPS11	TGA	TGAG
954	ENST00000270708.12	-0.0451091	0.313113	0.356036	0.108435	0.369212	0.727433	0.360292	0.1494	0.360292	0.1494	0.713938	[-0.13,0.86]	chr1	68	-1	1692	1383	104	205	WRAP73	TAG	TAGC
955	ENST00000270776.13	0.0279846	0.0540664	0.0254764	0.819535	0.713162	0.739244	0.0262852	0.823125	0.0262852	0.823125	0.988946	[-0.21,0.26]	chr1	121	1	2268	1452	54	762	PGD	TGA	TGAT
956	ENST00000271002.14	0.0425591	-0.176962	-0.221297	0.238057	0.10487	-0.114651	-0.218873	0.32968	-0.218873	0.32968	0.853516	[-0.66,0.22]	chr1	700	-1	948	534	82	332	ITGB3BP	TGA	TGAG
957	ENST00000271308.9	-0.0613296	-0.0290046	0.0319254	0.75437	0.978496	1.01082	0.0325964	0.754297	0.0319254	0.75437	0.984754	[-0.17,0.23]	chr1	882	-1	3815	726	118	2971	PSMA5	TAA	TAAG
958	ENST00000271375.7	0.0310202	0.0741892	0.0422571	0.798649	-1.60229	-1.55912	0.0446384	0.843422	0.0446384	0.843422	0.988946	[-0.4,0.5]	chr1	1387	1	11040	483	76	10481	SFT2D2	TAA	TAAT
959	ENST00000271452.8	-0.0911957	-0.117573	-0.0283316	0.874967	0.262421	0.236044	-0.0255824	0.904297	-0.0255824	0.904297	0.989633	[-0.44,0.39]	chr1	1361	1	1964	1395	279	290	NUF2	TGA	TGAT
960	ENST00000271526.9	0.0536744	-0.147116	-0.202222	0.18558	0.567229	0.366438	-0.200224	0.235519	-0.200224	0.235519	0.801392	[-0.53,0.13]	chr1	1249	1	2068	1476	237	355	PRCC	TAG	TAGG
961	ENST00000271628.9	-0.161219	0.0257852	0.18596	0.253466	1.8495	2.0365	0.187415	0.170723	0.18596	0.253466	0.809647	[-0.13,0.49]	chr1	1045	-1	1544	1275	44	225	SF3B4	TAA	TAAA
962	ENST00000271638.3	0.0313918	0.0359926	0.00300306	0.99908	2.02037	2.02497	0.0052065	0.973093	0.00300306	0.99908	0.999541	[-0.4,0.39]	chr1	1101	-1	563	318	89	156	S100A11	TGA	TGAG
963	ENST00000271715.7	-0.0607811	-0.114313	-0.055111	0.738813	0.431793	0.37826	-0.0527491	0.780782	-0.0527491	0.780782	0.986689	[-0.42,0.32]	chr1	1088	-1	6655	4233	344	2078	POGZ	TGA	TGAG
964	ENST00000271732.8	0.0210958	-0.180884	-0.20425	0.351639	-0.115232	-0.317211	-0.200964	0.457125	-0.200964	0.457125	0.922714	[-0.73,0.33]	chr1	1063	-1	3124	858	175	2091	GOLPH3L	TAA	TAAA
965	ENST00000271764.7	-0.0296076	0.12543	0.153675	0.449981	-1.13068	-0.975643	0.156681	0.565936	0.156681	0.565936	0.945217	[-0.38,0.7]	chr1	1618	-1	2011	1755	123	133	EIF2D	TGA	TGAC
966	ENST00000271843.9	0.00250837	0.507907	0.504643	0.00114231	-1.87135	-1.36595	0.507098	0.0217624	0.507098	0.0217624	0.302185	[0.07,0.95]	chr1	1164	-1	1273	441	422	410	JTB	TAG	TAGC
967	ENST00000271877.11	-0.032407	-0.00186079	0.0302543	0.782066	0.57281	0.603356	0.030856	0.799756	0.030856	0.799756	0.987569	[-0.21,0.27]	chr1	1171	1	3997	3240	167	590	UBAP2L	TAA	TAAG
968	ENST00000271883.9	-0.028396	-0.292451	-0.265699	0.246269	-1.05935	-1.3234	-0.26292	0.382694	-0.26292	0.382694	0.88191	[-0.85,0.33]	chr1	1213	-1	7138	6723	163	252	GON4L	TGA	TGAG
969	ENST00000272065.10	0.0103596	0.133983	0.122892	0.381975	-0.853906	-0.730283	0.124533	0.498266	0.124533	0.498266	0.923469	[-0.24,0.49]	chr2	2	1	1474	477	18	979	ACP1	TGA	TGAG
970	ENST00000272091.8	0.0814622	0.130746	0.0485058	0.750064	-0.432948	-0.383664	0.0502819	0.79432	0.0502819	0.79432	0.987349	[-0.33,0.44]	chr1	1723	-1	3987	1356	31	2600	SDE2	TGA	TGAG
971	ENST00000272139.5	0.0190815	0.243555	0.221723	0.370716	0.185832	0.410306	0.226871	0.433141	0.226871	0.433141	0.908599	[-0.34,0.8]	chr1	1741	-1	1290	792	98	400	C1orf35	TGA	TGAT
972	ENST00000272167.9	-0.101708	0.0871946	0.187247	0.400875	2.05984	2.24874	0.189492	0.284534	0.187247	0.400875	0.895855	[-0.25,0.6]	chr1	1720	1	1660	1368	80	212	EPHX1	TGA	TGAC
973	ENST00000272227.7	0.0532627	0.128367	0.0748241	0.362249	0.533595	0.6087	0.0753338	0.396863	0.0753338	0.396863	0.895855	[-0.1,0.25]	chr2	39	-1	2338	1323	148	867	PDIA6	TGA	TGAG
974	ENST00000272233.5	-0.101536	0.345146	0.445488	0.0213347	-0.818156	-0.371475	0.448709	0.0747344	0.448709	0.0747344	0.552959	[-0.05,0.95]	chr2	67	1	2372	591	392	1389	RHOB	TGA	TGAG
975	ENST00000272274.8	0.0416355	-0.363813	-0.405776	0.000246358	-1.58126	-1.9867	-0.405289	0.00506596	-0.405289	0.00506596	0.136453	[-0.69,-0.12]	chr13	43	1	616	483	90	43	RPL21	TAA	TAAT
976	ENST00000272298.12	0.0339114	-0.0972951	-0.131509	0.140818	-0.308048	-0.439254	-0.131027	0.221749	-0.131027	0.221749	0.78348	[-0.34,0.08]	chr2	237	-1	1210	450	68	692	CALM2	TGA	TGAA
977	ENST00000272348.7	0.0683289	0.0433542	-0.0256899	0.846592	-0.285611	-0.310586	-0.0242898	0.88298	-0.0242898	0.88298	0.989347	[-0.35,0.3]	chr2	325	-1	594	231	91	272	SNRPG	TAA	TAAA
978	ENST00000272418.7	-0.0208414	0.134163	0.154183	0.370434	-0.153904	0.00110052	0.156098	0.466297	0.156098	0.466297	0.922714	[-0.27,0.58]	chr2	444	-1	3298	1293	17	1988	MRPS5	TAA	TAAC
979	ENST00000272424.9	0.0242186	0.455454	0.429654	0.0487799	-0.227021	0.204214	0.433726	0.109281	0.433726	0.109281	0.636929	[-0.1,0.97]	chr2	355	-1	748	528	107	113	TPRKB	TGA	TGAA
980	ENST00000272444.7	0.107505	-0.0345843	-0.144785	0.502707	0.885652	0.743563	-0.141045	0.549205	-0.141045	0.549205	0.938362	[-0.6,0.32]	chr2	356	-1	1653	1134	42	477	DUSP11	TGA	TGAT
981	ENST00000272542.8	0.0705702	0.0657125	-0.00544832	0.967165	-0.560902	-0.56576	-0.00418576	0.981065	-0.00418576	0.981065	0.999541	[-0.34,0.33]	chr2	562	1	3297	2040	457	800	SLC20A1	TGA	TGAA
982	ENST00000272638.14	0.00332685	-0.230366	-0.234784	0.120365	-0.370334	-0.604026	-0.233171	0.213934	-0.233171	0.213934	0.779318	[-0.6,0.14]	chr2	655	1	3771	1527	75	2169	UBXN4	TAG	TAGT
983	ENST00000272748.9	-0.0468038	0.291711	0.337038	0.10827	-1.71707	-1.37855	0.341275	0.248811	0.341275	0.248811	0.808592	[-0.24,0.93]	chr2	781	-1	7542	1287	170	6085	LNPK	TAG	TAGT
984	ENST00000272793.9	-0.0369276	0.144664	0.180075	0.319473	-0.304684	-0.123092	0.182928	0.41392	0.182928	0.41392	0.903834	[-0.26,0.63]	chr2	749	1	8005	5667	50	2288	UBR3	TGA	TGAC
985	ENST00000273077.9	-0.120114	-0.0948423	0.0212055	0.943325	0.807214	0.832486	0.0267713	0.919512	0.0212055	0.943325	0.995968	[-0.51,0.53]	chr2	967	1	2987	1158	17	1812	PNKD	TGA	TGAT
986	ENST00000273130.9	-0.0102718	-0.0516393	-0.0423331	0.771051	0.403534	0.362166	-0.0407874	0.80964	-0.0407874	0.80964	0.988946	[-0.37,0.29]	chr3	128	-1	2485	1572	88	825	DYNC1LI1	TGA	TGAA
987	ENST00000273308.9	-0.0158441	0.421957	0.43653	0.00651619	-0.469154	-0.0313536	0.439316	0.0299987	0.439316	0.0299987	0.352278	[0.04,0.84]	chr12	487	-1	1450	549	193	708	CNPY2	TGA	TGAA
988	ENST00000273317.5	-0.112457	0.374018	0.485141	0.0223534	-1.60157	-1.1151	0.488916	0.0980102	0.488916	0.0980102	0.611029	[-0.09,1.08]	chr3	218	1	11442	2031	129	9282	LIMD1	TAG	TAGC
989	ENST00000273359.8	-0.00855962	-0.103141	-0.0958228	0.56173	-0.0267522	-0.121334	-0.0939462	0.640022	-0.0939462	0.640022	0.959975	[-0.49,0.3]	chr3	514	1	2604	921	36	1647	ABHD10	TAG	TAGT
990	ENST00000273398.8	0.030319	-0.0949683	-0.125772	0.243686	0.124551	-0.000736577	-0.125103	0.324365	-0.125103	0.324365	0.853516	[-0.37,0.12]	chr3	535	1	4575	1854	92	2629	ATP6V1A	TAG	TAGA
991	ENST00000273920.8	-0.0638899	-0.225267	-0.162965	0.42519	-0.704916	-0.866293	-0.160377	0.54102	-0.160377	0.54102	0.933757	[-0.67,0.35]	chr4	344	1	2083	786	240	1057	ENOPH1	TAG	TAGA
992	ENST00000273968.5	0.00802332	0.137058	0.127697	0.46683	-0.92148	-0.792446	0.130574	0.572632	0.130574	0.572632	0.945718	[-0.32,0.59]	chr4	381	-1	1311	345	76	890	PYURF	TAG	TAGT
993	ENST00000273986.10	0.0850653	-0.0672273	-0.153883	0.389396	-0.306298	-0.458591	-0.151555	0.498285	-0.151555	0.498285	0.923469	[-0.59,0.29]	chr4	424	1	5878	408	93	5377	CISD2	TAA	TAAT
994	ENST00000274065.9	0.106381	-0.128086	-0.234801	0.0020535	-2.08298	-2.31745	-0.234419	0.0143632	-0.234419	0.0143632	0.247252	[-0.42,-0.05]	chr4	568	1	869	795	25	49	RPS3A	TAA	TAAA
995	ENST00000274137.9	-0.00401277	-0.18746	-0.184416	0.187765	1.25593	1.07248	-0.183067	0.199492	-0.183067	0.199492	0.764993	[-0.46,0.1]	chr5	20	1	1082	375	18	689	NDUFS6	TAG	TAGA
996	ENST00000274140.10	-0.0414893	-0.0162989	0.0245065	0.847696	0.323449	0.348639	0.0254816	0.856109	0.0254816	0.856109	0.988946	[-0.25,0.31]	chr5	41	1	9641	2733	204	6704	2020-03-06	TAA	TAAA
997	ENST00000274254.9	-0.112557	0.240988	0.352671	0.0212024	-0.89166	-0.538116	0.35465	0.0769053	0.35465	0.0769053	0.558967	[-0.04,0.75]	chr5	91	1	1537	1233	274	30	SKP2	TAA	TAAA
998	ENST00000274364.11	0.10268	0.203481	0.0994756	0.61577	-0.0726083	0.0281928	0.102625	0.67755	0.102625	0.67755	0.971264	[-0.38,0.59]	chr5	237	1	5808	4728	261	819	IQGAP2	TGA	TGAA
999	ENST00000274606.7	0.0163192	-0.0672461	-0.0839529	0.392411	0.00110576	-0.0824596	-0.0831988	0.472528	-0.0831988	0.472528	0.922714	[-0.31,0.14]	chr5	738	-1	865	462	150	253	NHP2	TGA	TGAG
1000	ENST00000274712.7	0.0422854	-0.383168	-0.426656	0.0109407	-0.205989	-0.631443	-0.425122	0.0390039	-0.425122	0.0390039	0.412468	[-0.83,-0.02]	chr5	496	1	1647	600	127	920	ZMAT2	TGA	TGAG
1001	ENST00000274787.3	-0.0817866	0.210843	0.291587	0.0699269	-0.114102	0.178528	0.293398	0.128705	0.293398	0.128705	0.679747	[-0.09,0.68]	chr5	701	1	654	321	69	264	HIGD2A	TAA	TAAG
1002	ENST00000274813.4	-0.316873	-0.130796	0.183145	0.425335	0.382558	0.568634	0.187383	0.458611	0.187383	0.458611	0.922714	[-0.31,0.69]	chr6	479	-1	3811	2253	190	1368	MMUT	TAA	TAAT
1003	ENST00000274849.3	0.152227	-0.117776	-0.271496	0.107809	0.131858	-0.138145	-0.269121	0.181867	-0.269121	0.181867	0.752562	[-0.66,0.13]	chr6	133	1	2943	819	30	2094	ABT1	TGA	TGAG
1004	ENST00000275034.5	0.0257955	0.226965	0.200245	0.145802	-0.798516	-0.597346	0.202079	0.256739	0.202079	0.256739	0.809647	[-0.15,0.55]	chr6	563	-1	11926	5466	186	6274	PHIP	TAA	TAAC
1005	ENST00000275053.8	0.00917917	0.0681653	0.0573287	0.763093	-0.679212	-0.620226	0.0603536	0.806581	0.0603536	0.806581	0.988946	[-0.43,0.56]	chr6	623	-1	8643	3732	266	4645	MMS22L	TAA	TAAT
1006	ENST00000275072.5	0.0118253	0.0321697	0.0194857	0.888941	-0.693276	-0.672932	0.0209079	0.906802	0.0209079	0.906802	0.989633	[-0.34,0.38]	chr6	604	1	4703	1311	90	3302	PM20D2	TAA	TAAA
1007	ENST00000275227.9	0.0214749	0.0153167	-0.00737059	0.966728	-0.695302	-0.70146	-0.00486603	0.984084	-0.00486603	0.984084	0.999541	[-0.46,0.45]	chr6	764	-1	2452	1371	181	900	SLC18B1	TAG	TAGT
1008	ENST00000275517.8	-0.0382576	0.137524	0.174667	0.346685	-1.18435	-1.00857	0.177334	0.477311	0.177334	0.477311	0.922714	[-0.31,0.67]	chr11	600	-1	2475	759	62	1654	CDCA5	TGA	TGAG
1009	ENST00000275603.9	0.0427914	-0.0335916	-0.0766184	0.290677	0.20637	0.129987	-0.0761888	0.334564	-0.0761888	0.334564	0.854469	[-0.23,0.08]	chr7	252	1	2584	1596	84	904	CCT6A	TGA	TGAA
1010	ENST00000275766.2	0.0120716	0.0385181	0.0236334	0.929205	1.16992	1.19637	0.0279697	0.908332	0.0236334	0.929205	0.99511	[-0.46,0.49]	chr7	684	-1	1766	903	25	838	ZC3HAV1L	TAA	TAAA
1011	ENST00000275820.4	0.103104	-0.134689	-0.239287	0.227766	-0.709222	-0.947015	-0.236454	0.356302	-0.236454	0.356302	0.867856	[-0.74,0.27]	chr7	816	1	6082	2583	26	3473	NOM1	TAG	TAGT
1012	ENST00000276123.7	0.0179666	0.0199451	0.000500248	0.993455	-0.692064	-0.690086	0.00324151	0.985971	0.000500248	0.993455	0.999541	[-0.36,0.36]	chrX	398	1	2887	2286	508	93	ZNF711	TAA	TAAT
1013	ENST00000276201.6	0.103036	0.0706382	-0.0338626	0.842111	0.0933286	0.0609304	-0.0315035	0.879891	-0.0315035	0.879891	0.989347	[-0.43,0.37]	chrX	534	-1	2378	1452	70	856	UPF3B	TGA	TGAT
1014	ENST00000276202.8	0.0539073	-0.137312	-0.19268	0.303085	-0.681303	-0.872522	-0.19012	0.4318	-0.19012	0.4318	0.908599	[-0.66,0.28]	chrX	521	1	6625	6222	63	340	DOCK11	TGA	TGAG
1015	ENST00000276297.9	0.0409678	0.395546	0.352672	0.127674	-1.01979	-0.665214	0.357992	0.256108	0.357992	0.256108	0.809647	[-0.26,0.99]	chr8	65	-1	7412	4587	375	2450	DLC1	TGA	TGAT
1016	ENST00000276390.7	-0.00523636	-0.0260919	-0.0223728	0.89385	0.175456	0.1546	-0.0198958	0.921447	-0.0198958	0.921447	0.993589	[-0.41,0.37]	chr8	90	1	2856	1536	26	1294	ATP6V1B2	TAG	TAGC
1017	ENST00000276431.9	-0.0603836	0.0978566	0.156435	0.469706	-1.35669	-1.19845	0.160056	0.585295	0.160056	0.585295	0.948521	[-0.42,0.75]	chr8	116	-1	3998	1323	137	2538	TNFRSF10B	TAA	TAAG
1018	ENST00000276569.8	-0.0281147	0.0700545	0.0969706	0.644223	-1.46783	-1.36966	0.100033	0.727026	0.100033	0.727026	0.979347	[-0.47,0.68]	chr8	287	-1	3000	849	215	1936	ARMC1	TGA	TGAC
1019	ENST00000276585.9	0.0882326	-0.00454602	-0.0943343	0.640771	1.33589	1.24311	-0.0919877	0.665227	-0.0919877	0.665227	0.968262	[-0.51,0.32]	chr8	339	-1	838	564	11	263	MRPS28	TAA	TAAA
1020	ENST00000276914.7	-0.0907436	-0.121785	-0.033651	0.88484	0.0242072	-0.00683487	-0.0298427	0.920042	-0.0298427	0.920042	0.993133	[-0.59,0.54]	chr9	60	-1	1897	1314	96	487	PLIN2	TAA	TAAA
1021	ENST00000277010.9	-0.0776073	0.175376	0.252589	0.016239	-0.698779	-0.445796	0.253433	0.0541011	0.253433	0.0541011	0.481656	[0,0.51]	chr9	136	-1	1672	672	90	910	SIGMAR1	TGA	TGAC
1022	ENST00000277165.11	-0.0617854	-0.256203	-0.194879	0.1105	-1.02869	-1.22311	-0.194118	0.216325	-0.194118	0.216325	0.780814	[-0.5,0.11]	chr9	310	1	5160	3357	231	1572	FAM120A	TAA	TAAA
1023	ENST00000277632.8	0.00764208	0.331069	0.321512	0.13852	-1.28349	-0.960068	0.325925	0.273586	0.325925	0.273586	0.822365	[-0.26,0.92]	chr10	70	-1	2364	1338	208	818	MINDY3	TAA	TAAT
1024	ENST00000277865.5	0.0369762	0.0645858	0.0269484	0.819314	-0.486929	-0.459319	0.028083	0.849343	0.028083	0.849343	0.988946	[-0.27,0.32]	chr10	366	-1	3300	1677	74	1549	GLUD1	TAG	TAGA
1025	ENST00000278070.7	-0.0666095	-0.0218188	0.0436881	0.790325	-0.0489567	-0.00416617	0.0453414	0.813676	0.0453414	0.813676	0.988946	[-0.34,0.43]	chr10	506	1	5328	4995	29	304	PPRC1	TAA	TAAC
1026	ENST00000278193.7	-0.0184047	-0.037875	-0.0202555	0.894837	-1.47742	-1.49689	-0.0185636	0.926881	-0.0185636	0.926881	0.994831	[-0.41,0.38]	chr11	268	-1	4842	594	17	4231	LIN7C	TAA	TAAT
1027	ENST00000278353.10	0.0161525	-0.140601	-0.157447	0.260103	0.256145	0.0993915	-0.156157	0.348307	-0.156157	0.348307	0.861857	[-0.48,0.17]	chr11	316	1	2396	939	90	1367	HSD17B12	TAA	TAAG
1028	ENST00000278412.7	-0.0810213	0.0342671	0.115107	0.109772	0.0648464	0.180135	0.115503	0.157076	0.115503	0.157076	0.72505	[-0.04,0.28]	chr11	411	-1	2831	2130	282	419	SSRP1	TAG	TAGA
1029	ENST00000278422.9	-0.0448873	0.1236	0.167736	0.23261	-0.451996	-0.283509	0.169074	0.336166	0.169074	0.336166	0.854469	[-0.18,0.52]	chr11	426	1	1645	891	26	728	TMX2	TAA	TAAG
1030	ENST00000278483.8	-0.165393	0.540041	0.703757	0.00220097	-0.837039	-0.131605	0.708398	0.0198898	0.708398	0.0198898	0.291957	[0.11,1.32]	chr11	825	1	1108	594	209	305	HIKESHI	TAA	TAAT
1031	ENST00000278612.9	-0.00509798	0.286486	0.289731	0.169211	-1.06232	-0.770736	0.293611	0.300758	0.293611	0.300758	0.848933	[-0.26,0.86]	chr11	915	-1	6113	4284	102	1727	NPAT	TAA	TAAA
1032	ENST00000278616.8	0.0470605	-0.112979	-0.161009	0.376598	-1.42894	-1.58898	-0.159033	0.519149	-0.159033	0.519149	0.927676	[-0.64,0.32]	chr11	916	1	13147	9171	385	3591	ATM	TGA	TGAT
1033	ENST00000278618.9	0.0222189	-0.0339641	-0.0568507	0.644026	0.0904337	0.0342506	-0.0556863	0.705555	-0.0556863	0.705555	0.977022	[-0.34,0.23]	chr11	905	1	2767	930	49	1788	AASDHPPT	TGA	TGAT
1034	ENST00000278715.7	-0.156653	0.24015	0.394905	0.0398258	0.185676	0.582479	0.398115	0.06906	0.398115	0.06906	0.532385	[-0.03,0.83]	chr11	1011	1	1501	1086	151	264	HMBS	TAA	TAAC
1035	ENST00000278823.7	-0.0500215	0.161081	0.210751	0.0284004	-0.328246	-0.117143	0.211416	0.069052	0.211416	0.069052	0.532385	[-0.02,0.44]	chr11	521	-1	3083	2007	415	661	MTA2	TGA	TGAG
1036	ENST00000278840.9	-0.0444532	-0.0845095	-0.0416167	0.809952	0.454785	0.414729	-0.0395205	0.844945	-0.0395205	0.844945	0.988946	[-0.43,0.35]	chr11	504	1	3091	1335	91	1665	FADS2	TGA	TGAA
1037	ENST00000278849.4	0.120568	0.204012	0.0825659	0.57996	0.562999	0.646443	0.0842792	0.61409	0.0842792	0.61409	0.954353	[-0.24,0.42]	chr11	510	1	3698	2745	177	776	INCENP	TGA	TGAG
1038	ENST00000278856.8	0.0359741	-0.0643163	-0.102836	0.630075	0.273111	0.17282	-0.099195	0.695942	-0.099195	0.695942	0.975128	[-0.59,0.4]	chr11	542	-1	1289	1158	91	40	WDR74	TGA	TGAC
1039	ENST00000279146.8	-0.0171754	0.0873189	0.102713	0.609766	0.882169	0.986664	0.105391	0.609809	0.105391	0.609809	0.954353	[-0.3,0.52]	chr11	686	1	1236	993	133	110	AIP	TGA	TGAC
1040	ENST00000279230.10	-0.0421955	0.386339	0.426108	0.0644704	-0.502934	-0.0743998	0.430892	0.133451	0.430892	0.133451	0.686328	[-0.13,1.01]	chr11	571	1	4197	3705	127	365	PLCB3	TGA	TGAA
1041	ENST00000279392.7	-0.0700271	0.0411241	0.109038	0.581383	0.062968	0.174119	0.112439	0.630798	0.112439	0.630798	0.958362	[-0.35,0.58]	chr16	355	-1	3388	1671	831	886	HIRIP3	TGA	TGAG
1042	ENST00000279839.8	-0.00121088	0.178783	0.178638	0.332954	-0.345315	-0.165322	0.181324	0.43395	0.181324	0.43395	0.908599	[-0.27,0.64]	chr11	861	-1	1522	690	67	765	CWC15	TAG	TAGT
1043	ENST00000280154.12	0.010795	-0.25167	-0.263373	0.0350951	0.372527	0.110062	-0.262328	0.0661198	-0.262328	0.0661198	0.524453	[-0.54,0.02]	chr10	557	1	3481	1410	153	1918	PDCD4	TGA	TGAA
1044	ENST00000280326.9	0.0374965	-0.0929136	-0.130659	0.0531154	0.362581	0.232171	-0.130313	0.0779108	-0.130313	0.0779108	0.563592	[-0.28,0.01]	chr5	39	1	3293	1626	61	1606	CCT5	TGA	TGAA
1045	ENST00000280333.9	-0.011079	0.330841	0.340296	0.121547	-1.14941	-0.807493	0.34437	0.248448	0.34437	0.248448	0.808592	[-0.24,0.94]	chr10	653	1	6797	5598	109	1090	DOCK1	TGA	TGAC
1046	ENST00000280346.10	-0.00921461	-0.271822	-0.263411	0.0301857	-0.0674691	-0.330076	-0.26234	0.0722504	-0.26234	0.0722504	0.543974	[-0.55,0.02]	chr11	938	1	4458	1944	659	1855	DLAT	TAA	TAAC
1047	ENST00000280481.9	-0.0822696	0.14547	0.224221	0.392887	0.18695	0.414689	0.229865	0.439737	0.229865	0.439737	0.909875	[-0.36,0.82]	chr13	95	1	16122	9510	268	6344	FREM2	TGA	TGAT
1048	ENST00000280551.11	0.0162695	-0.00218216	-0.0215304	0.924602	0.554233	0.535781	-0.0165478	0.953982	-0.0165478	0.953982	0.997552	[-0.56,0.53]	chr4	477	-1	4018	3099	227	692	SEC24D	TAA	TAAT
1049	ENST00000280700.10	0.0238231	-0.0369207	-0.0628048	0.761348	-0.31251	-0.373254	-0.0594012	0.819827	-0.0594012	0.819827	0.988946	[-0.56,0.45]	chr3	109	-1	2534	1965	53	516	NGLY1	TGA	TGAG
1050	ENST00000280800.5	-0.438124	0.0493911	0.483788	0.31434	3.43543	3.92294	0.488713	0.0377927	0.483788	0.31434	0.852891	[-0.46,1.29]	chr12	800	1	4787	1770	14	3003	PLBD2	TGA	TGAA
1051	ENST00000280904.10	0.0742081	-0.0308069	-0.106331	0.536544	0.342589	0.237574	-0.104076	0.605284	-0.104076	0.605284	0.953842	[-0.5,0.29]	chr18	90	-1	12325	2706	444	9175	DSC2	TGA	TGAG
1052	ENST00000281038.10	-0.00434693	0.355256	0.357612	0.110157	-0.734131	-0.374528	0.362129	0.216626	0.362129	0.216626	0.780814	[-0.21,0.95]	chr11	808	-1	2512	1434	376	702	NARS2	TAG	TAGC
1053	ENST00000281141.9	0.150584	-0.0575253	-0.20867	0.0572213	0.296953	0.0888438	-0.207821	0.104447	-0.207821	0.104447	0.630121	[-0.46,0.04]	chr10	48	1	1321	1011	58	252	CDC123	TGA	TGAT
1054	ENST00000281273.8	-0.0116085	-0.0620322	-0.0519047	0.775136	-0.759771	-0.810195	-0.0493589	0.834556	-0.0493589	0.834556	0.988946	[-0.51,0.41]	chr3	539	1	4023	1248	257	2518	QTRT2	TGA	TGAG
1055	ENST00000281405.8	0.13043	-0.168357	-0.300326	0.120903	-0.0417862	-0.340573	-0.297822	0.210217	-0.297822	0.210217	0.773783	[-0.76,0.17]	chr2	62	-1	6918	3513	107	3298	WDR35	TAA	TAAA
1056	ENST00000281453.10	0.0714093	0.361328	0.28874	0.0794468	-0.781077	-0.491159	0.291172	0.174517	0.291172	0.174517	0.752267	[-0.13,0.72]	chr4	671	-1	2494	1257	34	1203	CENPU	TGA	TGAG
1057	ENST00000281456.11	-0.0673088	0.050324	0.115663	0.547447	0.31159	0.429223	0.118741	0.588644	0.118741	0.588644	0.949655	[-0.31,0.55]	chr4	674	1	4415	897	107	3411	SLC25A4	TAA	TAAT
1058	ENST00000281513.10	0.000798723	-0.106463	-0.10959	0.609389	-0.288148	-0.39541	-0.106277	0.693672	-0.106277	0.693672	0.97424	[-0.63,0.42]	chr2	50	-1	7278	7116	30	132	NBAS	TGA	TGAG
1059	ENST00000281543.6	-0.0694934	0.271799	0.340177	0.0476105	-1.03416	-0.692864	0.34304	0.133923	0.34304	0.133923	0.686328	[-0.11,0.8]	chr4	176	1	4460	2010	203	2247	GUF1	TAA	TAAT
1060	ENST00000281701.11	0.0705217	0.0631326	-0.00881566	0.957942	-0.387704	-0.395093	-0.00625023	0.977799	-0.00625023	0.977799	0.999541	[-0.42,0.41]	chr1	1712	-1	2897	2571	45	281	NVL	TGA	TGAT
1061	ENST00000281828.7	0.0392631	-0.122877	-0.162934	0.174655	0.65827	0.49613	-0.161749	0.218177	-0.161749	0.218177	0.780814	[-0.42,0.1]	chr2	1021	-1	7006	1770	264	4972	FARSB	TGA	TGAA
1062	ENST00000281871.10	-0.00492316	0.246244	0.249568	0.184374	1.00313	1.25429	0.252119	0.158603	0.249568	0.184374	0.752562	[-0.12,0.61]	chr2	626	1	933	477	355	101	MZT2B	TAG	TAGG
1063	ENST00000281950.8	0.00712315	0.232865	0.224207	0.269197	-0.511658	-0.285917	0.227262	0.379636	0.227262	0.379636	0.88012	[-0.28,0.74]	chr2	195	1	3705	504	91	3110	GEMIN6	TGA	TGAG
1064	ENST00000282003.7	0.0872027	-0.180091	-0.268511	0.115578	-0.556842	-0.824136	-0.266754	0.221244	-0.266754	0.221244	0.782297	[-0.69,0.16]	chr13	207	-1	3507	2181	35	1291	RNF219	TGA	TGAC
1065	ENST00000282050.6	0.0587792	-0.10699	-0.165999	0.0219383	0.451293	0.285524	-0.165731	0.0377372	-0.165731	0.0377372	0.408201	[-0.32,-0.01]	chr18	133	-1	1945	1662	145	138	ATP5F1A	TAA	TAAA
1066	ENST00000282058.11	0.0323599	-0.117385	-0.151933	0.462657	0.0464566	-0.103289	-0.148748	0.550114	-0.148748	0.550114	0.93862	[-0.63,0.34]	chr18	134	1	1072	837	27	208	HAUS1	TGA	TGAC
1067	ENST00000282074.7	-0.115356	-0.154621	-0.0419183	0.838772	1.25681	1.21754	-0.038718	0.858037	-0.038718	0.858037	0.988946	[-0.46,0.38]	chr2	739	-1	1342	675	127	540	SPC25	TAA	TAAC
1068	ENST00000282120.6	-0.00709951	-0.117616	-0.111872	0.532889	-0.143709	-0.254225	-0.109515	0.618195	-0.109515	0.618195	0.955161	[-0.54,0.32]	chr2	404	-1	6419	1440	334	4645	TGOLN2	TGA	TGAT
1069	ENST00000282276.7	0.00260143	-0.539639	-0.544853	0.0239331	0.358724	-0.183517	-0.541456	0.0565713	-0.541456	0.0565713	0.487123	[-1.1,0.02]	chr2	863	1	3019	1782	37	1200	MARS2	TAG	TAGA
1070	ENST00000282388.4	-0.115581	0.823511	0.936492	0.000557994	-0.0244792	0.914613	0.943169	0.00317897	0.943169	0.00317897	0.100133	[0.32,1.59]	chr2	211	-1	3693	1485	291	1917	ZFP36L2	TGA	TGAG
1071	ENST00000282441.10	-0.127774	0.261755	0.388224	0.032738	-1.3082	-0.918669	0.391155	0.111587	0.391155	0.111587	0.641101	[-0.09,0.88]	chr11	880	1	5401	1515	402	3484	YAP1	TAG	TAGA
1072	ENST00000282486.10	0.0481609	-0.0992443	-0.148685	0.44324	-1.63521	-1.78261	-0.146321	0.579748	-0.146321	0.579748	0.947418	[-0.66,0.37]	chr3	765	1	6422	1167	1842	3413	MBNL1	TAG	TAGA
1073	ENST00000282516.13	-0.0182547	-0.148346	-0.13135	0.435814	-0.252532	-0.382624	-0.129574	0.531536	-0.129574	0.531536	0.933437	[-0.53,0.28]	chr5	95	1	10425	8415	489	1521	NIPBL	TAA	TAAT
1074	ENST00000282541.9	-0.10723	0.0638874	0.169688	0.418564	-1.18277	-1.01165	0.172838	0.536886	0.172838	0.536886	0.933437	[-0.38,0.73]	chr3	124	1	4060	1056	201	2803	GPD1L	TAA	TAAA
1075	ENST00000282587.9	0.0438083	-0.150451	-0.196445	0.351495	-0.442196	-0.636455	-0.19328	0.470096	-0.19328	0.470096	0.922714	[-0.71,0.33]	chr2	168	1	5089	1386	37	3666	SLC30A6	TGA	TGAT
1076	ENST00000282633.10	0.0549201	-0.0758721	-0.132652	0.488611	-0.102269	-0.233061	-0.129551	0.58177	-0.129551	0.58177	0.948521	[-0.59,0.33]	chr10	205	1	4642	4026	52	564	WASHC2A	TAG	TAGA
1077	ENST00000282903.10	-0.067682	-0.154254	-0.0873805	0.535139	-0.192713	-0.279285	-0.0862744	0.615961	-0.0862744	0.615961	0.954552	[-0.42,0.25]	chr3	727	-1	3749	2277	195	1277	PLOD2	TAA	TAAG
1078	ENST00000283006.7	0.155086	-0.358486	-0.515092	0.0027608	0.381384	-0.132188	-0.513359	0.0105623	-0.513359	0.0105623	0.213843	[-0.91,-0.12]	chr5	194	1	1354	744	52	558	CENPH	TAA	TAAT
1079	ENST00000283109.8	0.102881	0.0280429	-0.0762075	0.690241	0.315896	0.241057	-0.0738551	0.748492	-0.0738551	0.748492	0.982892	[-0.52,0.38]	chr5	311	-1	3909	1659	56	2194	RIOK2	TAA	TAAT
1080	ENST00000283122.7	0.0964552	0.134023	0.0352665	0.871097	0.302167	0.339734	0.0391156	0.871865	0.0391156	0.871865	0.989347	[-0.45,0.53]	chr5	286	-1	2432	504	125	1803	CETN3	TAA	TAAA
1081	ENST00000283131.4	0.0120353	-0.111333	-0.123805	0.186679	0.287747	0.164378	-0.123151	0.247061	-0.123151	0.247061	0.80644	[-0.33,0.09]	chr4	542	1	7684	3159	223	4302	SMARCA5	TGA	TGAA
1082	ENST00000283195.11	0.127968	0.106838	-0.0214522	0.857639	-0.906586	-0.927717	-0.0205288	0.893546	-0.0205288	0.893546	0.989629	[-0.32,0.28]	chr2	536	1	11708	9675	125	1908	RANBP2	TAA	TAAA
1083	ENST00000283290.9	-0.0151172	0.504914	0.518951	0.00300942	-0.94912	-0.429089	0.521607	0.0255078	0.521607	0.0255078	0.325349	[0.06,0.99]	chr3	522	-1	1570	945	435	190	ATG3	TAA	TAAT
1084	ENST00000283351.9	0.0880407	0.0419527	-0.0468715	0.726366	-0.604423	-0.650512	-0.0455807	0.78839	-0.0455807	0.78839	0.987349	[-0.38,0.29]	chr18	99	-1	6247	4308	364	1575	TRAPPC8	TGA	TGAC
1085	ENST00000283415.4	-0.126494	0.112319	0.237397	0.156499	-0.668906	-0.430093	0.240029	0.255137	0.240029	0.255137	0.809647	[-0.17,0.66]	chr5	18	-1	3945	1605	116	2224	LPCAT1	TAG	TAGG
1086	ENST00000283632.5	-2.66415e-05	0.202909	0.202181	0.166005	-2.34766	-2.14473	0.204145	0.325087	0.204145	0.325087	0.853516	[-0.2,0.62]	chr2	427	1	6183	1176	377	4630	RMND5A	TGA	TGAA
1087	ENST00000283646.5	-0.108707	0.416969	0.523289	0.0299354	-0.0770077	0.448668	0.528234	0.0659729	0.528234	0.0659729	0.524453	[-0.04,1.1]	chr2	441	1	1813	936	26	851	RPIA	TGA	TGAC
1088	ENST00000283882.4	-0.0166062	-0.157426	-0.142044	0.395998	-0.325332	-0.466152	-0.140342	0.500999	-0.140342	0.500999	0.923469	[-0.55,0.27]	chr16	657	-1	1293	900	151	242	CFDP1	TGA	TGAT
1089	ENST00000284031.13	-0.151038	0.161105	0.310528	0.150851	-1.18397	-0.871829	0.314388	0.279039	0.314388	0.279039	0.829707	[-0.26,0.89]	chr1	778	-1	3939	858	114	2967	DDAH1	TGA	TGAG
1090	ENST00000284049.7	0.111389	0.0578265	-0.0544435	0.699253	-0.618419	-0.671983	-0.0527016	0.769135	-0.0527016	0.769135	0.985535	[-0.4,0.3]	chr5	313	-1	6457	5133	148	1176	CHD1	TAA	TAAC
1091	ENST00000284073.7	-0.125948	0.328855	0.453535	0.0137761	-1.56946	-1.11466	0.456646	0.0736035	0.456646	0.0736035	0.549805	[-0.04,0.97]	chr17	768	1	6379	987	220	5172	MSI2	TGA	TGAG
1092	ENST00000284320.5	-0.0062349	-0.042285	-0.0365887	0.75187	-0.398169	-0.434219	-0.0356001	0.804298	-0.0356001	0.804298	0.988428	[-0.32,0.25]	chr3	477	-1	4409	1827	449	2133	TOMM70	TAA	TAAA
1093	ENST00000284551.11	0.0503657	0.261614	0.208611	0.377176	-0.186122	0.0251261	0.213163	0.458215	0.213163	0.458215	0.922714	[-0.35,0.79]	chr1	1747	-1	2710	1407	274	1029	TRIM11	TGA	TGAC
1094	ENST00000284878.12	-0.0814531	0.257107	0.337123	0.0709455	-1.22696	-0.888398	0.340314	0.178136	0.340314	0.178136	0.752562	[-0.16,0.84]	chr21	20	1	5593	1098	87	4408	CXADR	TAG	TAGA
1095	ENST00000284984.8	-0.060767	-0.0466113	0.0135651	0.911728	0.0722999	0.0864556	0.0144651	0.917291	0.0144651	0.917291	0.991841	[-0.27,0.3]	chr21	32	-1	5183	2904	455	1824	ADAMTS1	TAA	TAAG
1096	ENST00000285021.11	0.0967733	-0.422899	-0.522258	0.0168933	0.134657	-0.385015	-0.519	0.0480084	-0.519	0.0480084	0.462801	[-1.03,0]	chr3	69	-1	3832	2823	215	794	XPC	TGA	TGAG
1097	ENST00000285093.15	0.0620308	0.115684	0.0520578	0.782461	-0.480849	-0.427196	0.0550298	0.817561	0.0550298	0.817561	0.988946	[-0.42,0.54]	chr18	151	-1	2926	1194	49	1683	ACAA2	TGA	TGAA
1098	ENST00000285379.10	0.0318822	-0.29161	-0.324251	0.0109431	0.606107	0.282614	-0.323408	0.0231866	-0.323408	0.0231866	0.310443	[-0.6,-0.04]	chr8	360	1	1562	783	75	704	CA2	TAA	TAAG
1099	ENST00000285398.6	0.0585147	-0.0205298	-0.0804876	0.654065	-0.455052	-0.534097	-0.0781377	0.732744	-0.0781377	0.732744	0.980673	[-0.52,0.37]	chr2	609	-1	2750	2349	95	306	ERCC3	TGA	TGAT
1100	ENST00000285667.4	-0.0456497	-0.058768	-0.0141099	0.925804	-0.0159769	-0.0290953	-0.0124419	0.947573	-0.0124419	0.947573	0.995968	[-0.38,0.35]	chr21	16	-1	3945	1416	27	2502	HSPA13	TGA	TGAA
1101	ENST00000285737.8	-0.0204613	-0.28722	-0.267993	0.0766951	-0.194316	-0.461075	-0.266399	0.147726	-0.266399	0.147726	0.710541	[-0.63,0.09]	chr16	441	1	8199	2559	93	5547	LONP2	TAG	TAGG
1102	ENST00000285814.9	0.0367524	0.022103	-0.0156416	0.915018	-0.120398	-0.135047	-0.0140527	0.939807	-0.0140527	0.939807	0.995968	[-0.37,0.34]	chr2	602	-1	1686	882	25	779	NIFK	TGA	TGAT
1103	ENST00000285873.8	0.0774191	-0.0268365	-0.104854	0.393022	0.399151	0.294895	-0.104003	0.463113	-0.104003	0.463113	0.922714	[-0.38,0.17]	chr5	612	-1	5404	4527	78	799	GEMIN5	TGA	TGAA
1104	ENST00000285930.9	-0.00959936	-0.134968	-0.125776	0.21779	0.794011	0.668642	-0.125271	0.257897	-0.125271	0.257897	0.809928	[-0.34,0.09]	chr7	659	-1	1361	951	38	372	AKR1B1	TGA	TGAA
1105	ENST00000285968.11	0.0232837	-0.13067	-0.154182	0.0443277	0.0276893	-0.126265	-0.153792	0.0808021	-0.153792	0.0808021	0.57035	[-0.33,0.02]	chr7	669	1	6264	6039	28	197	NUP205	TGA	TGAG
1106	ENST00000286298.4	-0.0928973	-0.0621196	0.0292953	0.874186	-1.11389	-1.08312	0.0320725	0.89691	0.0320725	0.89691	0.989629	[-0.47,0.53]	chr5	570	1	8080	2220	268	5592	SLC26A2	TAA	TAAT
1107	ENST00000286371.8	-0.0650068	-0.107459	-0.0429915	0.679086	0.725507	0.683054	-0.0422587	0.708334	-0.0422587	0.708334	0.977022	[-0.26,0.18]	chr3	714	1	1847	840	159	848	ATP1B3	TAG	TAGT
1108	ENST00000286428.6	0.0668353	-0.191044	-0.258378	0.0169738	-0.15949	-0.417369	-0.257521	0.0483414	-0.257521	0.0483414	0.463132	[-0.51,0]	chrX	768	1	1592	594	23	975	VBP1	TAA	TAAT
1109	ENST00000286621.6	-0.0614631	0.136546	0.196486	0.300545	0.640598	0.838607	0.199137	0.337971	0.199137	0.337971	0.855012	[-0.21,0.61]	chr10	319	1	1169	1089	50	30	ADK	TGA	TGAT
1110	ENST00000286788.9	-0.0252118	-0.0601967	-0.0351557	0.633062	0.649781	0.614796	-0.0348682	0.656269	-0.0348682	0.656269	0.966293	[-0.19,0.12]	chr21	38	-1	1854	1647	58	149	CCT8	TGA	TGAA
1111	ENST00000286835.11	-0.130329	0.0240216	0.152418	0.444541	1.24509	1.39944	0.15503	0.421703	0.152418	0.444541	0.914444	[-0.24,0.53]	chr21	79	-1	4193	3444	383	366	SCAF4	TAG	TAGA
1112	ENST00000287022.9	0.0844377	-0.419778	-0.504657	9.34407e-07	0.197719	-0.306497	-0.504175	2.0502e-05	-0.504175	2.0502e-05	0.00234696	[-0.74,-0.27]	chr8	399	-1	5575	336	104	5135	UQCRB	TAA	TAAT
1113	ENST00000287025.3	0.0320981	0.0787471	0.0435402	0.862513	0.268395	0.315044	0.0486161	0.863251	0.0486161	0.863251	0.989181	[-0.52,0.62]	chr8	400	-1	1409	1254	99	56	MTERF3	TAG	TAGA
1114	ENST00000287038.8	-0.035993	0.0304951	0.066267	0.388885	-0.381318	-0.31483	0.0667542	0.465643	0.0667542	0.465643	0.922714	[-0.11,0.25]	chr8	408	-1	498	348	70	80	RPL30	TAA	TAAA
1115	ENST00000287295.8	-0.119586	-0.0395419	0.0793372	0.508349	0.762784	0.842829	0.0803613	0.520876	0.0803613	0.520876	0.927676	[-0.17,0.33]	chrX	581	-1	2222	1842	185	195	AIFM1	TGA	TGAA
1116	ENST00000287322.5	-0.00492068	-0.315216	-0.311656	0.13146	-1.51862	-1.82892	-0.309212	0.265573	-0.309212	0.265573	0.817088	[-0.85,0.24]	chr8	195	1	4197	1374	15	2808	BAG4	TGA	TGAA
1117	ENST00000287380.6	0.00490369	-0.0546929	-0.0611298	0.772356	-0.553443	-0.61304	-0.0581422	0.831637	-0.0581422	0.831637	0.988946	[-0.59,0.48]	chr8	484	1	3478	3201	63	214	TBC1D31	TAG	TAGA
1118	ENST00000287394.10	0.180926	0.0624249	-0.119748	0.432232	-0.32834	-0.446841	-0.117907	0.538922	-0.117907	0.538922	0.933437	[-0.49,0.26]	chr8	486	-1	5547	4173	90	1284	ATAD2	TGA	TGAT
1119	ENST00000287474.9	0.0586688	-0.167869	-0.230237	0.343844	0.76364	0.537102	-0.225423	0.400722	-0.225423	0.400722	0.895855	[-0.75,0.3]	chr1	838	-1	2678	1881	602	195	FRRS1	TAG	TAGA
1120	ENST00000287482.6	0.0223025	0.102033	0.0781593	0.663867	-0.437363	-0.357633	0.0811081	0.721269	0.0811081	0.721269	0.978285	[-0.37,0.53]	chr1	840	-1	3848	1974	116	1758	SASS6	TAA	TAAT
1121	ENST00000288207.7	0.0345833	-0.0982102	-0.133906	0.37365	0.742389	0.609595	-0.132493	0.420826	-0.132493	0.420826	0.90452	[-0.45,0.19]	chr15	232	1	1488	1197	123	168	CCNB2	TAG	TAGG
1122	ENST00000288266.8	0.0578082	0.0832735	0.024868	0.862893	-1.2424	-1.21694	0.0265554	0.890115	0.0265554	0.890115	0.989347	[-0.36,0.41]	chr3	387	1	6069	2130	155	3784	APPL1	TAA	TAAG
1123	ENST00000288532.11	0.109078	-0.0502126	-0.162178	0.510929	0.225895	0.0666041	-0.157296	0.596067	-0.157296	0.596067	0.952394	[-0.73,0.43]	chr12	841	-1	1506	984	17	505	COQ5	TAA	TAAT
1124	ENST00000288937.6	0.0847364	-0.269656	-0.355931	0.0249498	0.674388	0.319995	-0.35399	0.0461833	-0.35399	0.0461833	0.454791	[-0.7,-0.01]	chr11	144	-1	1969	528	105	1336	MRPL17	TAA	TAAC
1125	ENST00000289119.7	0.0974572	-0.265672	-0.366091	0.101805	0.594257	0.231127	-0.362537	0.152599	-0.362537	0.152599	0.718138	[-0.86,0.13]	chr18	64	-1	2029	1230	109	690	ABHD3	TAA	TAAC
1126	ENST00000289371.11	0.109829	0.275038	0.164291	0.249784	0.656913	0.822123	0.165921	0.272403	0.165921	0.272403	0.822365	[-0.13,0.46]	chr2	494	1	5741	3663	166	1912	EIF5B	TAA	TAAT
1127	ENST00000289382.8	-0.0317766	0.00334177	0.0338984	0.828354	-0.372689	-0.33757	0.0359281	0.851578	0.0359281	0.851578	0.988946	[-0.35,0.42]	chr2	504	1	2515	1533	79	903	CNOT11	TAA	TAAT
1128	ENST00000289968.11	-0.0423057	0.170641	0.21109	0.264724	0.632661	0.845608	0.214198	0.298209	0.214198	0.298209	0.848293	[-0.19,0.62]	chr16	301	-1	3495	2646	108	741	ARHGAP17	TGA	TGAA
1129	ENST00000290039.6	-0.0438689	0.003896	0.0456132	0.842396	-0.565326	-0.517562	0.0493393	0.862979	0.0493393	0.862979	0.989181	[-0.53,0.64]	chr1	705	1	5274	3672	105	1497	CACHD1	TAA	TAAC
1130	ENST00000290130.4	0.00341283	-0.207751	-0.213057	0.254587	0.146053	-0.0651103	-0.21049	0.344875	-0.21049	0.344875	0.861152	[-0.65,0.23]	chr21	81	-1	1546	702	35	809	MIS18A	TGA	TGAA
1131	ENST00000290155.8	0.007078	0.0838693	0.0758016	0.610499	0.509529	0.58632	0.0775881	0.638252	0.0775881	0.638252	0.959975	[-0.25,0.4]	chr21	86	-1	3516	873	134	2509	CFAP298	TGA	TGAA
1132	ENST00000290158.9	-0.0198905	-0.0619748	-0.0422058	0.535521	-0.07882	-0.120904	-0.0420416	0.587905	-0.0420416	0.587905	0.949655	[-0.19,0.11]	chr17	675	1	6058	2631	326	3101	KPNB1	TGA	TGAT
1133	ENST00000290231.11	-0.0547802	-0.102472	-0.0499771	0.803642	0.119856	0.0721636	-0.0468548	0.847591	-0.0468548	0.847591	0.988946	[-0.52,0.43]	chr20	333	-1	3224	1740	175	1309	NCOA5	TGA	TGAA
1134	ENST00000290299.7	-0.0170089	-0.0560177	-0.0393568	0.664338	0.741736	0.702727	-0.0387387	0.692485	-0.0387387	0.692485	0.97424	[-0.23,0.15]	chr21	103	-1	756	642	41	73	ATP5PO	TAA	TAAA
1135	ENST00000290341.8	-0.0489406	-0.0508213	-0.00240212	0.980163	-0.163545	-0.165425	-0.0016813	0.989279	-0.0016813	0.989279	0.999541	[-0.24,0.23]	chr17	708	1	8796	1734	361	6701	IGF2BP1	TGA	TGAC
1136	ENST00000290349.11	0.0395658	0.0941367	0.0537058	0.713008	0.622163	0.676733	0.0551895	0.727369	0.0551895	0.727369	0.979347	[-0.26,0.37]	chr21	111	1	1208	834	92	282	CBR1	TGA	TGAG
1137	ENST00000290429.10	-0.0337469	-0.104084	-0.0725753	0.72665	0.530713	0.460376	-0.0694802	0.771591	-0.0694802	0.771591	0.985535	[-0.53,0.4]	chr22	318	-1	2056	1173	46	837	MCAT	TGA	TGAC
1138	ENST00000290573.6	-0.0411318	-0.0782332	-0.0383563	0.814976	0.272848	0.235747	-0.0363879	0.850922	-0.0363879	0.850922	0.988946	[-0.41,0.34]	chr2	385	1	5772	2754	600	2418	HK2	TAG	TAGA
1139	ENST00000290649.10	-0.0381747	0.36343	0.40084	0.0147196	-1.37429	-0.972682	0.403356	0.0732977	0.403356	0.0732977	0.548416	[-0.04,0.85]	chr16	472	-1	3607	1932	218	1457	AMFR	TAG	TAGC
1140	ENST00000290650.9	0.104576	-0.118018	-0.224518	0.283284	-0.276046	-0.49864	-0.221654	0.399711	-0.221654	0.399711	0.895855	[-0.73,0.29]	chr15	124	-1	7698	5250	16	2432	UBR1	TGA	TGAG
1141	ENST00000290663.10	0.0507768	-0.100115	-0.153051	0.462684	0.0410592	-0.109832	-0.149538	0.553334	-0.149538	0.553334	0.93958	[-0.64,0.35]	chr1	546	-1	1483	906	44	533	MED8	TGA	TGAA
1142	ENST00000290810.8	0.0961325	0.011584	-0.0851027	0.461383	0.23959	0.155042	-0.0842166	0.541224	-0.0842166	0.541224	0.933757	[-0.35,0.19]	chr16	535	-1	1813	1605	77	131	NAE1	TAG	TAGA
1143	ENST00000290921.10	-0.0845611	0.264493	0.347458	0.0675448	-1.16387	-0.81482	0.351029	0.163534	0.351029	0.163534	0.738447	[-0.14,0.85]	chr4	21	-1	2297	1323	182	792	CTBP1	TAG	TAGC
1144	ENST00000290949.8	-0.0603732	-0.0270435	0.0324599	0.825407	0.844699	0.878028	0.03365	0.823613	0.0324599	0.825407	0.988946	[-0.25,0.31]	chr16	564	-1	1636	1056	71	509	ATP6V0D1	TAG	TAGC
1145	ENST00000291386.4	-0.00925326	0.836957	0.845264	6.03202e-07	-1.71098	-0.864765	0.849051	0.000512558	0.849051	0.000512558	0.0277753	[0.37,1.34]	chr1	37	-1	1284	585	306	393	SSU72	TGA	TGAG
1146	ENST00000291439.7	-0.126434	-0.191545	-0.0664866	0.696163	0.894249	0.829138	-0.0646417	0.724141	-0.0646417	0.724141	0.979015	[-0.42,0.29]	chr19	428	1	13193	1272	449	11472	AP1M1	TGA	TGAG
1147	ENST00000291442.3	0.00456245	0.0685982	0.0613937	0.793769	-0.378229	-0.314194	0.0657021	0.82067	0.0657021	0.82067	0.988946	[-0.52,0.66]	chr19	446	-1	2404	1215	720	469	NR2F6	TGA	TGAC
1148	ENST00000291458.9	0.0621348	-0.335807	-0.400293	0.073279	0.194146	-0.203796	-0.397103	0.136579	-0.397103	0.136579	0.689387	[-0.92,0.13]	chr3	580	-1	720	435	7	278	CCDC58	TAA	TAAA
1149	ENST00000291552.8	-0.000455128	0.100473	0.0998737	0.553702	1.62448	1.72541	0.101537	0.507192	0.0998737	0.553702	0.93958	[-0.23,0.42]	chr21	159	-1	962	723	93	146	U2AF1	TGA	TGAG
1150	ENST00000291565.9	-0.0620383	0.116583	0.177464	0.259224	-0.222776	-0.0441547	0.179541	0.352087	0.179541	0.352087	0.862115	[-0.2,0.56]	chr21	165	1	7341	939	166	6236	PDXK	TGA	TGAG
1151	ENST00000291568.6	-0.034765	0.138005	0.171691	0.287614	0.872363	1.04513	0.173627	0.305349	0.173627	0.305349	0.850015	[-0.16,0.51]	chr21	166	-1	2164	297	176	1691	CSTB	TGA	TGAT
1152	ENST00000291576.12	0.0294491	0.00435381	-0.0272908	0.88839	0.63	0.604904	-0.0240378	0.916951	-0.0240378	0.916951	0.991841	[-0.47,0.42]	chr21	170	1	3188	2760	18	410	PWP2	TAG	TAGA
1153	ENST00000291842.10	-0.0692438	0.0634731	0.130032	0.599649	1.14365	1.27637	0.133905	0.576839	0.130032	0.599649	0.953842	[-0.35,0.6]	chr19	754	1	2341	2124	27	190	SHKBP1	TGA	TGAA
1154	ENST00000291900.7	-0.116044	-0.0637365	0.0496877	0.842016	-0.0674592	-0.0151521	0.0536029	0.852759	0.0536029	0.852759	0.988946	[-0.53,0.64]	chr9	537	-1	4293	2301	441	1551	ZER1	TAG	TAGA
1155	ENST00000292123.9	0.0800423	0.0815371	0.000780526	0.996323	0.985381	0.986876	0.00196124	0.985975	0.000780526	0.996323	0.999541	[-0.23,0.23]	chr19	156	1	3042	2748	107	187	SAFB	TGA	TGAG
1156	ENST00000292211.5	-0.0381594	0.0940917	0.130995	0.438132	-1.14749	-1.01524	0.133452	0.552105	0.133452	0.552105	0.939217	[-0.31,0.58]	chr1	1178	-1	3239	1269	109	1861	UBE2Q1	TAA	TAAC
1157	ENST00000292246.7	-0.162889	-0.153484	0.00639098	0.98485	0.635282	0.644686	0.010557	0.965689	0.00639098	0.98485	0.999541	[-0.49,0.49]	chr3	196	-1	3212	1983	171	1058	ANO10	TGA	TGAG
1158	ENST00000292363.10	-0.061804	0.310087	0.369448	0.0995556	0.781197	1.15309	0.373354	0.105511	0.373354	0.105511	0.630366	[-0.08,0.83]	chr19	13	-1	1631	936	93	602	RNF126	TGA	TGAG
1159	ENST00000292385.9	-0.14229	-0.350189	-0.209455	0.202954	0.433306	0.225407	-0.20763	0.251145	-0.20763	0.251145	0.809647	[-0.56,0.15]	chr5	726	-1	3072	1956	610	506	DBN1	TAG	TAGC
1160	ENST00000292431.5	-0.010613	0.271004	0.279564	0.187231	-1.11914	-0.837523	0.283997	0.309651	0.283997	0.309651	0.852891	[-0.26,0.84]	chr19	364	1	4524	1584	199	2741	NACC1	TAA	TAAC
1161	ENST00000292599.4	-0.0488643	-0.0284683	0.0185773	0.920609	-0.773448	-0.753053	0.0213596	0.927159	0.0213596	0.927159	0.994831	[-0.46,0.51]	chr5	758	1	5748	3051	291	2406	MAML1	TAA	TAAT
1162	ENST00000292614.9	-0.000767854	0.211461	0.210449	0.33666	-0.874296	-0.662068	0.214596	0.461822	0.214596	0.461822	0.922714	[-0.36,0.8]	chr7	512	-1	932	354	47	531	POLR2J	TAG	TAGG
1163	ENST00000292616.10	0.0942978	-0.190268	-0.286724	0.136935	1.11631	0.831743	-0.283901	0.1597	-0.283901	0.1597	0.730537	[-0.68,0.11]	chr7	511	1	2160	1944	97	119	LRWD1	TAG	TAGC
1164	ENST00000292644.5	0.130533	-0.0440109	-0.175091	0.138003	0.722109	0.547564	-0.174259	0.181696	-0.174259	0.181696	0.752562	[-0.43,0.08]	chr7	528	1	2712	1302	69	1341	PSMC2	TGA	TGAA
1165	ENST00000292733.11	-0.129435	-0.0483601	0.0782564	0.735278	0.862264	0.943338	0.0822243	0.721154	0.0782564	0.735278	0.981871	[-0.37,0.52]	chr22	45	1	3252	2247	77	928	MED15	TAG	TAGC
1166	ENST00000292778.10	-0.0182968	0.208458	0.225607	0.163652	0.530426	0.757181	0.227422	0.203936	0.227422	0.203936	0.767241	[-0.12,0.58]	chr22	61	-1	1351	972	50	329	YDJC	TGA	TGAC
1167	ENST00000292782.8	0.0102296	-0.0561523	-0.0677899	0.730809	-1.19317	-1.25955	-0.0649168	0.805388	-0.0649168	0.805388	0.988758	[-0.58,0.45]	chr3	856	-1	7954	780	154	7020	DCUN1D1	TAG	TAGC
1168	ENST00000292807.9	-0.0697351	0.214322	0.283708	0.00129753	-0.533167	-0.24911	0.28427	0.00905891	0.28427	0.00905891	0.192934	[0.07,0.5]	chr3	871	1	1931	1308	148	475	AP2M1	TAG	TAGC
1169	ENST00000293350.9	0.0252205	0.161606	0.132068	0.66101	1.43652	1.57291	0.137932	0.604598	0.132068	0.66101	0.967326	[-0.45,0.68]	chr19	1007	1	3099	2409	107	583	ALDH16A1	TGA	TGAT
1170	ENST00000293379.9	0.03646	0.344927	0.30668	0.187215	-0.41097	-0.102502	0.311372	0.292373	0.311372	0.292373	0.8424	[-0.27,0.9]	chr12	437	-1	4250	3150	68	1032	ITGA5	TGA	TGAG
1171	ENST00000293406.7	-0.159012	0.610495	0.768783	3.88581e-05	-1.38646	-0.616948	0.771801	0.00321457	0.771801	0.00321457	0.100133	[0.26,1.3]	chr17	622	-1	2308	588	148	1572	LSM12	TGA	TGAG
1172	ENST00000293831.13	0.0706877	-0.145623	-0.216446	0.000291983	-0.0481936	-0.264504	-0.216284	0.00136914	-0.216284	0.00136914	0.0597074	[-0.35,-0.08]	chr17	154	1	1758	1221	17	520	EIF4A1	TGA	TGAG
1173	ENST00000293872.12	0.142425	0.15275	0.00781627	0.973585	0.456405	0.466729	0.0122029	0.958215	0.00781627	0.973585	0.999541	[-0.43,0.44]	chr16	9	-1	1456	1116	111	229	LUC7L	TGA	TGAA
1174	ENST00000294053.8	-0.0617955	-0.225341	-0.164483	0.272142	-0.330964	-0.494509	-0.162918	0.378081	-0.162918	0.378081	0.879465	[-0.52,0.2]	chr11	744	-1	10170	2124	174	7872	CLPB	TAG	TAGC
1175	ENST00000294179.7	-0.147889	0.412404	0.557939	0.0181258	-0.397353	0.162939	0.563298	0.0553473	0.563298	0.0553473	0.487123	[-0.01,1.15]	chr11	540	-1	1794	1068	154	572	STX5	TGA	TGAA
1176	ENST00000294353.7	-0.058613	0.000408919	0.0581846	0.734229	-1.64959	-1.59057	0.0600552	0.797417	0.0600552	0.797417	0.987349	[-0.41,0.53]	chr1	639	1	8143	2235	201	5707	ZYG11B	TGA	TGAT
1177	ENST00000294383.7	-0.0469308	-0.034377	0.0118201	0.932197	-0.716739	-0.704186	0.0132428	0.939029	0.0132428	0.939029	0.995968	[-0.34,0.37]	chr1	674	-1	10800	7863	251	2686	USP24	TAG	TAGA
1178	ENST00000294785.10	-0.0929568	-0.0674591	0.0240877	0.901543	1.40441	1.4299	0.0261684	0.879474	0.0240877	0.901543	0.989629	[-0.34,0.37]	chr1	1305	1	2822	2130	14	678	NCSTN	TGA	TGAG
1179	ENST00000295006.6	-0.0843013	0.122406	0.205963	0.154282	-1.14343	-0.936722	0.207577	0.282013	0.207577	0.282013	0.833928	[-0.17,0.59]	chr1	1708	1	3366	2103	102	1161	CAPN2	TGA	TGAA
1180	ENST00000295050.12	0.0317656	-0.0789957	-0.111824	0.496447	-0.257617	-0.368379	-0.110074	0.591416	-0.110074	0.591416	0.950875	[-0.51,0.29]	chr1	1773	1	3223	1470	91	1662	SPRTN	TGA	TGAA
1181	ENST00000295066.3	0.00726482	-0.100931	-0.11075	0.612541	-0.0609721	-0.169168	-0.106904	0.69059	-0.106904	0.69059	0.97424	[-0.63,0.42]	chr2	166	-1	631	300	249	82	DPY30	TGA	TGAC
1182	ENST00000295079.6	0.101052	-0.171746	-0.27634	0.256776	1.02867	0.75587	-0.271481	0.298036	-0.271481	0.298036	0.848293	[-0.78,0.24]	chr2	870	1	1495	876	322	297	MAIP1	TAA	TAAT
1183	ENST00000295119.9	0.0489226	-0.00722756	-0.059153	0.801522	0.358609	0.302459	-0.0545859	0.847052	-0.0545859	0.847052	0.988946	[-0.6,0.5]	chr2	817	1	1545	981	15	549	NUP35	TAG	TAGT
1184	ENST00000295124.9	0.0394101	0.0214611	-0.0194409	0.910812	-0.0547169	-0.072666	-0.0168645	0.938187	-0.0168645	0.938187	0.995968	[-0.44,0.41]	chr2	537	1	2375	1998	52	325	CCDC138	TAG	TAGA
1185	ENST00000295321.9	0.073938	-0.0697711	-0.144896	0.320845	0.0984391	-0.0452701	-0.143171	0.412592	-0.143171	0.412592	0.903519	[-0.48,0.2]	chr2	612	-1	2973	2460	281	232	IWS1	TGA	TGAC
1186	ENST00000295326.4	0.0111559	0.644049	0.630832	0.00727071	-0.888112	-0.255219	0.636747	0.04265	0.636747	0.04265	0.436527	[0.02,1.27]	chr2	361	-1	444	306	31	107	BOLA3	TAA	TAAG
1187	ENST00000295491.9	0.0549412	0.300057	0.243269	0.186512	0.435694	0.68081	0.246216	0.22679	0.246216	0.22679	0.794209	[-0.15,0.65]	chr4	355	1	1550	429	20	1101	MRPS18C	TAA	TAAA
1188	ENST00000295566.8	-0.054644	0.14758	0.200443	0.307737	-0.798563	-0.596339	0.204074	0.427096	0.204074	0.427096	0.906179	[-0.3,0.71]	chr1	1211	-1	2626	2391	24	211	YY1AP1	TGA	TGAG
1189	ENST00000295598.10	-0.0382805	-0.045655	-0.00755542	0.909757	0.767799	0.760425	-0.00723391	0.916691	-0.00723391	0.916691	0.991841	[-0.15,0.13]	chr1	961	1	3670	3072	268	330	ATP1A1	TAG	TAGC
1190	ENST00000295628.4	-0.0134484	0.137665	0.15015	0.357202	-2.02568	-1.87456	0.152522	0.506608	0.152522	0.506608	0.924943	[-0.3,0.61]	chr3	561	-1	7918	1116	111	6691	LRRC58	TGA	TGAA
1191	ENST00000295633.8	-0.0033847	0.0667368	0.0692821	0.626304	-0.702139	-0.632017	0.0708911	0.699381	0.0708911	0.699381	0.976659	[-0.29,0.44]	chr3	562	-1	5682	927	96	4659	FSTL1	TAA	TAAT
1192	ENST00000295640.9	-0.140998	0.242746	0.38274	0.0114883	0.834568	1.21831	0.384467	0.0148453	0.384467	0.0148453	0.252462	[0.07,0.7]	chr1	1554	1	2399	1953	19	427	RNPEP	TAG	TAGA
1193	ENST00000295682.4	0.0392082	-0.281391	-0.321466	0.0148277	1.14742	0.82682	-0.32047	0.0199921	-0.32047	0.0199921	0.292473	[-0.59,-0.05]	chr1	1196	-1	552	489	31	32	KRTCAP2	TGA	TGAC
1194	ENST00000295688.8	-0.0257099	-0.119847	-0.0942226	0.12324	0.680326	0.586189	-0.0941401	0.142928	-0.0941401	0.142928	0.705215	[-0.22,0.03]	chr1	1232	-1	1977	1638	108	231	CCT3	TGA	TGAG
1195	ENST00000295736.9	0.0541867	-0.255223	-0.311163	0.113971	-0.416214	-0.725624	-0.308339	0.213691	-0.308339	0.213691	0.779055	[-0.79,0.18]	chr3	113	-1	7757	3645	71	4041	SLC4A7	TAG	TAGA
1196	ENST00000295746.13	0.053758	-0.0905996	-0.145296	0.327505	0.109303	-0.0350549	-0.143983	0.41784	-0.143983	0.41784	0.904503	[-0.49,0.2]	chr3	501	-1	4066	2718	63	1285	CIP2A	TAG	TAGA
1197	ENST00000295766.9	-0.0102995	-0.136283	-0.126083	0.131096	2.5611	2.43511	-0.125837	0.0687645	-0.126083	0.131096	0.683093	[-0.29,0.04]	chr12	321	-1	1887	1356	480	51	TUBA1A	TAA	TAAA
1198	ENST00000295770.3	-0.0554552	-0.168915	-0.113871	0.273887	-0.372451	-0.485911	-0.113163	0.371201	-0.113163	0.371201	0.877793	[-0.36,0.14]	chr3	121	1	4248	2481	209	1558	STT3B	TAA	TAAA
1199	ENST00000295797.5	-0.00943817	-0.0442548	-0.0357508	0.844608	-1.29752	-1.33234	-0.0336992	0.888895	-0.0336992	0.888895	0.989347	[-0.5,0.44]	chr3	821	1	4887	1791	246	2850	PRKCI	TGA	TGAT
1200	ENST00000295830.13	0.107191	-0.561514	-0.6713	0.00104545	0.615964	-0.0527412	-0.668407	0.00413872	-0.668407	0.00413872	0.117709	[-1.12,-0.21]	chr3	824	-1	1902	369	28	1505	RPL22L1	TAG	TAGG
1201	ENST00000295888.8	-0.0121993	0.0260385	0.0362331	0.863183	-1.00696	-0.968726	0.0396657	0.885255	0.0396657	0.885255	0.989347	[-0.52,0.61]	chr4	360	-1	14247	10581	408	3258	WDFY3	TGA	TGAA
1202	ENST00000295899.10	0.105988	-0.0614094	-0.16842	0.296888	0.556898	0.3895	-0.166647	0.368996	-0.166647	0.368996	0.875911	[-0.53,0.2]	chr3	412	-1	892	615	15	262	THOC7	TAG	TAGA
1203	ENST00000295901.8	0.148074	-0.128656	-0.277337	0.0131385	0.9261	0.64937	-0.276481	0.02155	-0.276481	0.02155	0.300846	[-0.51,-0.04]	chr3	413	-1	1430	1170	141	119	PSMD6	TAA	TAAA
1204	ENST00000296051.6	0.0384603	-0.0228907	-0.0636506	0.782848	-0.205635	-0.266986	-0.0596997	0.837402	-0.0596997	0.837402	0.988946	[-0.62,0.51]	chr3	739	1	4665	3015	140	1510	HPS3	TAA	TAAA
1205	ENST00000296122.10	-0.0295796	0.0551883	0.0843101	0.451539	-0.502967	-0.418199	0.0851481	0.542612	0.0851481	0.542612	0.934419	[-0.19,0.36]	chr2	148	1	3527	984	198	2345	PPP1CB	TGA	TGAA
1206	ENST00000296149.9	-0.0416292	-0.144344	-0.104474	0.612677	-0.0847866	-0.187501	-0.101518	0.689244	-0.101518	0.689244	0.97424	[-0.6,0.4]	chr3	248	-1	1352	801	122	429	ELP6	TGA	TGAC
1207	ENST00000296220.6	-0.0412305	-0.116875	-0.0775663	0.715979	-0.601621	-0.677265	-0.07406	0.787163	-0.07406	0.787163	0.987263	[-0.61,0.46]	chr3	606	-1	4598	2244	697	1657	OSBPL11	TGA	TGAC
1208	ENST00000296255.8	0.0260871	0.0515704	0.0251185	0.771756	0.377693	0.403177	0.0257262	0.7915	0.0257262	0.7915	0.987349	[-0.17,0.22]	chr3	632	-1	2284	1824	18	442	RPN1	TAG	TAGC
1209	ENST00000296273.6	-0.0620694	-0.205879	-0.1449	0.347026	0.387937	0.244127	-0.143175	0.4227	-0.143175	0.4227	0.904883	[-0.49,0.21]	chr3	905	-1	1384	1092	223	69	RFC4	TAA	TAAC
1210	ENST00000296292.8	-0.0392575	0.0118034	0.0493062	0.791769	0.0144017	0.0654626	0.0520311	0.813145	0.0520311	0.813145	0.988946	[-0.39,0.49]	chr3	368	-1	5081	1626	35	3420	RFT1	TGA	TGAC
1211	ENST00000296328.9	-0.0149267	0.139622	0.153731	0.34068	-1.19764	-1.04309	0.155588	0.467321	0.155588	0.467321	0.922714	[-0.27,0.58]	chr3	954	-1	10521	1470	28	9023	UBXN7	TAA	TAAC
1212	ENST00000296388.9	-0.00564721	-0.0244837	-0.0202419	0.898352	1.05071	1.03188	-0.0180866	0.917738	-0.0180866	0.917738	0.991841	[-0.36,0.33]	chr1	531	-1	2585	2211	52	322	P3H1	TGA	TGAC
1213	ENST00000296411.11	-0.0472106	-0.119727	-0.0737199	0.647175	0.0180345	-0.054482	-0.0720147	0.710736	-0.0720147	0.710736	0.977022	[-0.45,0.31]	chr4	402	1	2686	1161	33	1492	METAP1	TAA	TAAT
1214	ENST00000296412.13	0.0894786	-0.17308	-0.263382	0.0327725	0.263657	0.00109813	-0.262336	0.0673557	-0.262336	0.0673557	0.52812	[-0.54,0.02]	chr4	403	-1	2594	1125	30	1439	ADH5	TAA	TAAT
1215	ENST00000296417.6	0.0745527	-0.155925	-0.230663	0.00109069	0.339077	0.1086	-0.23048	0.00310749	-0.23048	0.00310749	0.0988139	[-0.38,-0.08]	chr4	415	-1	866	387	105	374	H2AFZ	TAA	TAAA
1216	ENST00000296424.9	-0.0186846	-0.334405	-0.318976	0.194296	0.344133	0.028412	-0.314741	0.273049	-0.314741	0.273049	0.822365	[-0.88,0.25]	chr4	427	-1	2920	738	72	2110	BDH2	TGA	TGAT
1217	ENST00000296456.10	-0.0609995	0.0250328	0.0851126	0.585728	0.0858387	0.171871	0.0865865	0.63672	0.0865865	0.63672	0.959975	[-0.27,0.45]	chr3	293	1	2879	2199	51	629	APEH	TGA	TGAA
1218	ENST00000296490.8	0.017251	-0.154805	-0.17274	0.240816	-1.32282	-1.49487	-0.171402	0.377857	-0.171402	0.377857	0.879465	[-0.55,0.21]	chr3	349	-1	4286	942	288	3056	WDR82	TGA	TGAC
1219	ENST00000296509.11	0.0636459	-0.0170529	-0.0812438	0.481008	-0.339532	-0.42023	-0.0803852	0.573093	-0.0803852	0.573093	0.945718	[-0.36,0.2]	chr4	484	-1	5227	618	114	4495	MAD2L1	TGA	TGAG
1220	ENST00000296511.10	0.0267177	-0.080032	-0.1073	0.306429	0.418761	0.312012	-0.106386	0.371631	-0.106386	0.371631	0.877793	[-0.34,0.13]	chr4	489	-1	1638	963	153	522	ANXA5	TAA	TAAC
1221	ENST00000296564.9	-0.0173383	-0.0968854	-0.0807851	0.668422	-1.42425	-1.5038	-0.0783856	0.758547	-0.0783856	0.758547	0.984754	[-0.57,0.42]	chr5	26	1	7930	6801	239	890	ICE1	TGA	TGAC
1222	ENST00000296577.9	0.00484533	-0.0255941	-0.0307792	0.7676	-0.56087	-0.591309	-0.0300057	0.815741	-0.0300057	0.815741	0.988946	[-0.28,0.22]	chr4	548	1	3887	1800	136	1951	ABCE1	TAG	TAGA
1223	ENST00000296597.10	-0.0262801	-0.0458676	-0.0219186	0.919738	0.0651338	0.0455461	-0.0180386	0.94713	-0.0180386	0.94713	0.995968	[-0.54,0.51]	chr5	171	1	632	510	51	71	NDUFAF2	TGA	TGAA
1224	ENST00000296679.9	0.00442539	-0.139567	-0.145422	0.411043	-0.705053	-0.849046	-0.143017	0.529051	-0.143017	0.529051	0.933175	[-0.59,0.3]	chr5	245	-1	3678	1380	96	2202	WDR41	TAG	TAGT
1225	ENST00000296684.10	0.116291	-0.367077	-0.485977	0.0267669	0.74271	0.259342	-0.482585	0.0468795	-0.482585	0.0468795	0.454791	[-0.96,-0.01]	chr5	140	1	669	528	24	117	NDUFS4	TAG	TAGG
1226	ENST00000296702.9	0.0354395	-0.0873996	-0.123356	0.309149	-0.174395	-0.297234	-0.122293	0.410425	-0.122293	0.410425	0.901238	[-0.41,0.17]	chr5	542	1	4654	3297	38	1319	TCERG1	TAA	TAAT
1227	ENST00000296755.12	-0.0050945	0.226666	0.230637	0.1357	0.401447	0.633207	0.232656	0.177914	0.232656	0.177914	0.752562	[-0.11,0.57]	chr5	211	1	11790	7407	57	4326	MAP1B	TAA	TAAA
1228	ENST00000296786.8	-0.0510079	0.232652	0.28205	0.139342	0.199234	0.482893	0.284713	0.193558	0.284713	0.193558	0.758005	[-0.14,0.72]	chr5	633	1	2179	957	117	1105	UBLCP1	TAG	TAGT
1229	ENST00000296792.9	0.0207525	0.0722498	0.0502412	0.775918	-0.321999	-0.270502	0.0525408	0.807544	0.0525408	0.807544	0.988946	[-0.38,0.49]	chr5	222	1	5096	1557	253	3286	UTP15	TAG	TAGT
1230	ENST00000297071.9	-0.0432317	-0.0690683	-0.02663	0.835406	0.85201	0.826174	-0.0254867	0.854208	-0.0254867	0.854208	0.988946	[-0.3,0.25]	chr7	115	-1	1785	849	157	779	TRA2A	TGA	TGAT
1231	ENST00000297135.7	0.0562867	-0.0265177	-0.0848913	0.681031	0.110988	0.0281831	-0.0818406	0.745372	-0.0818406	0.745372	0.982424	[-0.57,0.41]	chr7	546	-1	4060	2583	525	952	COG5	TAA	TAAT
1232	ENST00000297151.9	-0.0293936	0.304	0.332051	0.0710563	-1.11033	-0.776941	0.33527	0.176798	0.33527	0.176798	0.75255	[-0.15,0.83]	chr5	642	-1	3480	1761	75	1644	SLU7	TAG	TAGC
1233	ENST00000297156.4	-0.0158593	0.160687	0.174755	0.376368	-0.658362	-0.481816	0.177902	0.484073	0.177902	0.484073	0.922714	[-0.32,0.69]	chr5	428	1	2171	891	73	1207	CAMLG	TGA	TGAA
1234	ENST00000297185.9	0.0876204	-0.181889	-0.269797	0.000279002	0.504939	0.235429	-0.269477	0.000797045	-0.269477	0.000797045	0.0388263	[-0.43,-0.11]	chr5	462	-1	4404	2040	83	2281	HSPA9	TAA	TAAT
1235	ENST00000297258.11	-0.121583	-0.634691	-0.516266	0.0237694	0.121029	-0.39208	-0.512676	0.0530108	-0.512676	0.0530108	0.47852	[-1.03,0.01]	chr8	344	1	676	408	60	208	FABP5	TAA	TAAA
1236	ENST00000297338.6	-0.0691569	-0.0931158	-0.0244844	0.807587	0.0357529	0.011794	-0.023618	0.840485	-0.023618	0.840485	0.988946	[-0.25,0.21]	chr8	463	-1	3749	1896	288	1565	RAD21	TAA	TAAG
1237	ENST00000297431.9	-0.102187	0.13092	0.231431	0.234456	0.424037	0.657144	0.234063	0.280201	0.234063	0.280201	0.830986	[-0.19,0.66]	chr7	531	-1	1924	1308	109	507	ORC5	TGA	TGAA
1238	ENST00000297440.11	-0.0135195	-0.144599	-0.132467	0.396368	1.1363	1.00522	-0.130663	0.407592	-0.130663	0.407592	0.900321	[-0.44,0.18]	chr7	3	1	3412	2568	22	822	DNAAF5	TGA	TGAC
1239	ENST00000297540.5	0.124555	-0.192058	-0.318001	0.0575929	-0.468263	-0.784876	-0.31617	0.135771	-0.31617	0.135771	0.688463	[-0.73,0.1]	chr5	375	1	3609	1185	16	2408	PHAX	TAA	TAAG
1240	ENST00000297591.10	0.0116202	-0.0284252	-0.0411366	0.779389	-0.00976324	-0.0498088	-0.0395964	0.825254	-0.0395964	0.825254	0.988946	[-0.39,0.31]	chr8	389	-1	6478	5439	22	1017	VIRMA	TAA	TAAA
1241	ENST00000297792.9	-0.116559	0.160177	0.27496	0.181836	-0.735774	-0.459038	0.278715	0.293706	0.278715	0.293706	0.842615	[-0.24,0.81]	chr6	81	1	3811	1773	177	1861	KDM1B	TAA	TAAG
1242	ENST00000297933.10	-0.000185372	-0.017938	-0.0184101	0.880713	-0.185176	-0.202929	-0.0173776	0.908945	-0.0173776	0.908945	0.989683	[-0.31,0.28]	chr9	486	1	6003	4383	247	1373	GAPVD1	TGA	TGAC
1243	ENST00000298048.7	0.0517907	0.0149073	-0.0379889	0.799452	-0.125491	-0.162374	-0.0363356	0.844814	-0.0363356	0.844814	0.988946	[-0.39,0.33]	chr9	181	1	2452	1956	151	345	MELK	TAA	TAAT
1244	ENST00000298130.5	0.0630117	-0.00239615	-0.0676732	0.765601	-0.513862	-0.57927	-0.0638547	0.828934	-0.0638547	0.828934	0.988946	[-0.63,0.51]	chr14	144	-1	2662	216	33	2413	SPTSSA	TGA	TGAC
1245	ENST00000298229.7	0.000368398	0.0449381	0.043121	0.807226	-0.911601	-0.867032	0.045739	0.841059	0.045739	0.841059	0.988946	[-0.41,0.51]	chr11	742	1	4789	3777	218	794	INPPL1	TGA	TGAT
1246	ENST00000298281.8	0.0568917	0.539118	0.480764	0.0139334	-1.54771	-1.06549	0.485245	0.0790689	0.485245	0.0790689	0.566557	[-0.06,1.04]	chr11	813	1	7677	4668	452	2557	PCF11	TAA	TAAA
1247	ENST00000298288.11	0.0764775	-0.277541	-0.356209	0.1031	0.0323391	-0.32168	-0.353276	0.183432	-0.353276	0.183432	0.752562	[-0.87,0.17]	chr14	186	1	1502	1245	81	176	LRR1	TAA	TAAT
1248	ENST00000298289.6	0.0548541	-0.225315	-0.280811	0.027289	-0.395116	-0.675285	-0.279721	0.0742366	-0.279721	0.0742366	0.551833	[-0.59,0.03]	chr14	187	-1	746	321	160	265	RPL36AL	TAA	TAAA
1249	ENST00000298292.12	0.065404	0.311407	0.243074	0.317201	-0.0672487	0.178754	0.248563	0.400271	0.248563	0.400271	0.895855	[-0.33,0.84]	chr14	189	-1	2963	2514	81	368	DNAAF2	TAA	TAAT
1250	ENST00000298307.10	-0.0473493	0.196983	0.242731	0.250905	-0.616869	-0.372537	0.246198	0.363888	0.246198	0.363888	0.870939	[-0.29,0.79]	chr14	192	1	4969	1221	316	3432	KLHDC2	TAA	TAAG
1251	ENST00000298310.10	0.0372914	-0.0814654	-0.12034	0.507085	-0.355405	-0.474162	-0.117743	0.603308	-0.117743	0.603308	0.953842	[-0.56,0.33]	chr14	193	-1	5819	3231	35	2553	NEMF	TAG	TAGC
1252	ENST00000298316.7	-0.107257	0.549677	0.656228	6.47949e-05	-1.72614	-1.06921	0.65906	0.00463854	0.65906	0.00463854	0.130091	[0.2,1.12]	chr14	194	1	3875	528	557	2790	ARF6	TAA	TAAT
1253	ENST00000298317.9	-0.0339495	0.161973	0.193952	0.395392	-0.652917	-0.456995	0.197908	0.502599	0.197908	0.502599	0.923469	[-0.38,0.79]	chr11	1097	-1	2468	1134	12	1322	RPUSD4	TGA	TGAA
1254	ENST00000298510.4	-0.045238	-0.0401092	0.00481279	0.953167	0.325486	0.330615	0.00521386	0.952895	0.00481279	0.953167	0.997384	[-0.16,0.17]	chr10	603	-1	1553	771	22	760	PRDX3	TAG	TAGA
1255	ENST00000298556.8	-0.0634302	0.00502828	0.0678197	0.584836	1.98785	2.05631	0.06863	0.509201	0.0678197	0.584836	0.948521	[-0.17,0.3]	chrX	602	1	1395	657	147	591	HPRT1	TAA	TAAG
1256	ENST00000298717.9	-0.0100818	-0.16694	-0.15817	0.373703	0.278431	0.121573	-0.156041	0.456463	-0.156041	0.456463	0.922714	[-0.57,0.26]	chr14	51	-1	1980	1743	117	120	METTL3	TAG	TAGA
1257	ENST00000298746.5	-0.0963382	-0.145911	-0.0512311	0.797198	-1.00752	-1.0571	-0.0484014	0.853341	-0.0484014	0.853341	0.988946	[-0.56,0.46]	chr10	580	1	3406	1050	59	2297	TRUB1	TGA	TGAG
1258	ENST00000298852.7	0.0465971	-0.147255	-0.194299	0.073595	0.640158	0.446306	-0.193633	0.108378	-0.193633	0.108378	0.634745	[-0.43,0.04]	chr11	358	-1	1544	1320	158	66	PSMC3	TAG	TAGG
1259	ENST00000298875.8	0.00802052	-0.197362	-0.205889	0.0823765	-0.380395	-0.585778	-0.205165	0.16187	-0.205165	0.16187	0.733863	[-0.49,0.08]	chr14	438	1	13035	2349	285	10401	CPSF2	TAA	TAAA
1260	ENST00000299106.8	0.0594452	0.550237	0.489457	0.0132935	-1.67281	-1.18202	0.493568	0.0786893	0.493568	0.0786893	0.564762	[-0.06,1.06]	chr11	1125	1	3912	933	159	2820	JAM3	TGA	TGAG
1261	ENST00000299138.11	0.0717961	-0.206092	-0.278607	0.0143926	0.26381	-0.0140782	-0.277653	0.0348648	-0.277653	0.0348648	0.390332	[-0.53,-0.02]	chr16	430	-1	6790	2391	59	4340	VPS35	TAA	TAAA
1262	ENST00000299163.7	-0.120825	-0.0854731	0.0338155	0.864228	-1.25046	-1.21511	0.0367923	0.888845	0.0367923	0.888845	0.989347	[-0.49,0.57]	chr10	483	1	12927	1050	16	11861	HIF1AN	TAG	TAGC
1263	ENST00000299166.9	-0.103961	-0.285051	-0.181727	0.0929038	1.16964	0.988545	-0.180953	0.103904	-0.180953	0.103904	0.630121	[-0.4,0.04]	chr10	482	-1	678	561	20	97	NDUFB8	TGA	TGAG
1264	ENST00000299192.8	-0.0472588	-0.121854	-0.075795	0.643845	-0.229717	-0.304312	-0.0738382	0.715221	-0.0738382	0.715221	0.978062	[-0.47,0.32]	chr16	448	1	4416	2043	162	2211	HEATR3	TAA	TAAA
1265	ENST00000299238.6	-0.105514	-0.179906	-0.078348	0.758501	0.759107	0.684716	-0.0731679	0.79744	-0.0731679	0.79744	0.987349	[-0.63,0.48]	chr10	504	1	2649	2328	85	236	HPS6	TGA	TGAC
1266	ENST00000299299.4	-0.116019	-0.0309583	0.0834024	0.668479	-0.0310594	0.0540009	0.0861241	0.70783	0.0861241	0.70783	0.977022	[-0.37,0.54]	chr10	279	-1	787	315	32	440	PCBD1	TAG	TAGA
1267	ENST00000299335.7	0.0575905	-0.0587317	-0.117416	0.475776	-0.536845	-0.653167	-0.115561	0.583573	-0.115561	0.583573	0.948521	[-0.53,0.3]	chr17	753	-1	2497	831	139	1527	COX11	TGA	TGAA
1268	ENST00000299424.9	-0.077054	0.169938	0.245059	0.239011	-0.307962	-0.0609706	0.248655	0.33597	0.248655	0.33597	0.854469	[-0.26,0.76]	chr11	141	-1	5312	657	27	4628	TAF10	TGA	TGAG
1269	ENST00000299427.12	-0.136007	-0.0628356	0.0701085	0.851786	2.79892	2.87209	0.0740757	0.740103	0.0701085	0.851786	0.988946	[-0.59,0.67]	chr11	142	-1	3492	1692	22	1778	TPP1	TGA	TGAC
1270	ENST00000299518.7	0.0382853	0.00412515	-0.0350319	0.799247	0.0492395	0.0150795	-0.0334376	0.84019	-0.0334376	0.84019	0.988946	[-0.36,0.29]	chr15	394	1	4083	1101	42	2940	IDH3A	TAA	TAAC
1271	ENST00000299565.9	0.0195494	0.159186	0.138019	0.464952	0.182742	0.322379	0.14084	0.525102	0.14084	0.525102	0.929793	[-0.3,0.58]	chr15	402	1	3623	1407	200	2016	CHRNA5	TGA	TGAA
1272	ENST00000299601.10	0.118285	-0.223833	-0.3445	0.0977192	0.458212	0.116094	-0.341396	0.156153	-0.341396	0.156153	0.723711	[-0.81,0.13]	chr15	199	-1	2165	2001	33	131	LEO1	TGA	TGAA
1273	ENST00000299608.7	0.0745566	0.311605	0.235468	0.298412	-0.577009	-0.339961	0.23957	0.416689	0.23957	0.416689	0.904503	[-0.34,0.83]	chr18	214	-1	4737	1365	127	3245	TMX3	TGA	TGAG
1274	ENST00000299626.10	-0.132631	-0.0180163	0.113695	0.412551	0.803946	0.918561	0.115029	0.434524	0.115029	0.434524	0.908599	[-0.17,0.41]	chr11	804	-1	1637	1581	38	18	ALG8	TGA	TGAA
1275	ENST00000299736.5	0.00109689	0.0324164	0.0296878	0.880736	-0.208313	-0.176994	0.0326587	0.890115	0.0326587	0.890115	0.989347	[-0.44,0.51]	chr17	240	-1	1132	819	33	280	CENPV	TGA	TGAG
1276	ENST00000299767.10	0.113425	0.0439265	-0.0696251	0.335511	0.60401	0.534511	-0.0693653	0.399833	-0.0693653	0.399833	0.895855	[-0.23,0.09]	chr12	706	1	2782	2412	106	264	HSP90B1	TAA	TAAA
1277	ENST00000299853.10	-0.0507767	-0.099644	-0.0502128	0.771558	-0.655304	-0.704171	-0.0480086	0.828811	-0.0480086	0.828811	0.988946	[-0.48,0.39]	chr16	279	1	3690	2127	167	1396	POLR3E	TGA	TGAC
1278	ENST00000300026.3	0.0437204	0.0506748	0.00662361	0.939175	0.987613	0.994567	0.00702504	0.934968	0.00662361	0.939175	0.995968	[-0.16,0.17]	chr15	260	-1	1081	651	219	211	PPIB	TAG	TAGG
1279	ENST00000300027.12	0.00406806	0.201567	0.196955	0.0944581	-0.291994	-0.0944952	0.198094	0.176581	0.198094	0.176581	0.75255	[-0.09,0.49]	chr15	462	1	4713	3807	104	802	FANCI	TAA	TAAA
1280	ENST00000300086.5	-0.148658	0.00839925	0.155558	0.341877	0.341375	0.498432	0.157741	0.39093	0.157741	0.39093	0.889167	[-0.2,0.52]	chr16	665	1	2131	1200	110	821	TERF2IP	TAA	TAAT
1281	ENST00000300087.7	0.0473671	0.127751	0.0797418	0.652415	-1.72687	-1.64648	0.0817455	0.740188	0.0817455	0.740188	0.982424	[-0.41,0.58]	chr16	292	1	10954	549	77	10328	DCTN5	TAG	TAGC
1282	ENST00000300093.9	-0.0452566	-0.0227355	0.0220314	0.847981	1.2186	1.24112	0.022774	0.838106	0.0220314	0.847981	0.988946	[-0.2,0.24]	chr16	293	1	2160	1812	44	304	PLK1	TAA	TAAT
1283	ENST00000300107.7	-0.0471667	-0.0456612	-0.000500201	0.99884	0.0495904	0.0510957	0.00260101	0.988416	-0.000500201	0.99884	0.999541	[-0.38,0.38]	chr15	276	-1	4695	1902	189	2604	CLPX	TAA	TAAA
1284	ENST00000300146.10	-0.169291	-0.179288	-0.0127833	0.953636	0.343141	0.333145	-0.00897489	0.97579	-0.00897489	0.97579	0.999541	[-0.55,0.54]	chr11	455	-1	4129	2313	142	1674	PATL1	TAA	TAAA
1285	ENST00000300151.5	-0.0120284	0.126528	0.137562	0.35406	0.500035	0.638591	0.139045	0.402449	0.139045	0.402449	0.896747	[-0.19,0.47]	chr11	457	-1	1083	756	120	207	MRPL16	TAG	TAGT
1286	ENST00000300231.6	-0.0126929	0.0482255	0.0581906	0.815599	0.297249	0.358168	0.0624406	0.82263	0.0624406	0.82263	0.988946	[-0.5,0.63]	chr15	135	1	10266	8412	467	1387	MAP1A	TGA	TGAA
1287	ENST00000300249.9	0.0212143	0.0436228	0.0217635	0.867283	0.0358292	0.0582376	0.0228235	0.87939	0.0228235	0.87939	0.989347	[-0.28,0.33]	chr18	109	1	4265	984	180	3101	MAPRE2	TGA	TGAC
1288	ENST00000300289.10	0.101487	0.0288164	-0.0729653	0.433371	0.900696	0.828026	-0.0725054	0.477845	-0.0725054	0.477845	0.922714	[-0.27,0.13]	chr15	141	1	3680	1518	102	2060	PDIA3	TAA	TAAA
1289	ENST00000300291.10	-0.014794	0.20037	0.214794	0.0703001	-1.40241	-1.18724	0.215847	0.176713	0.215847	0.176713	0.75255	[-0.1,0.53]	chr16	473	-1	4393	684	130	3579	NUDT21	TGA	TGAA
1290	ENST00000300403.11	-0.0446301	-0.0109265	0.033188	0.7699	0.189059	0.222763	0.0340078	0.792577	0.0340078	0.792577	0.987349	[-0.22,0.29]	chr20	164	1	3473	2244	509	720	TPX2	TAA	TAAA
1291	ENST00000300408.7	-0.0246851	0.225106	0.249414	0.0121909	-0.512123	-0.262333	0.250237	0.0388502	0.250237	0.0388502	0.412468	[0.01,0.49]	chr17	714	-1	1832	819	73	940	PHB	TGA	TGAG
1292	ENST00000300413.10	0.111375	-0.0265103	-0.138329	0.187336	-0.440883	-0.578768	-0.137456	0.289676	-0.137456	0.289676	0.83845	[-0.39,0.12]	chr18	63	1	4858	360	116	4382	SNRPD1	TAA	TAAT
1293	ENST00000300456.5	-0.119389	0.0690387	0.187227	0.276268	-0.583883	-0.395455	0.189579	0.382034	0.189579	0.382034	0.88169	[-0.24,0.62]	chr9	527	1	3229	1932	318	979	SLC27A4	TGA	TGAT
1294	ENST00000300648.7	0.0304655	-0.0639186	-0.0950455	0.368026	0.143665	0.0492807	-0.0940434	0.427828	-0.0940434	0.427828	0.906955	[-0.33,0.14]	chr12	830	-1	8681	8016	18	647	GCN1	TGA	TGAG
1295	ENST00000300737.8	-0.0575491	0.332973	0.388225	0.0953768	-0.534716	-0.144194	0.393215	0.187837	0.393215	0.187837	0.754285	[-0.19,0.99]	chr11	84	1	4038	2058	569	1411	STIM1	TAG	TAGG
1296	ENST00000300738.10	0.110518	-0.0521927	-0.163085	0.0861031	0.612129	0.449418	-0.162571	0.112059	-0.162571	0.112059	0.642585	[-0.36,0.04]	chr11	85	1	3142	2379	214	549	RRM1	TGA	TGAG
1297	ENST00000300811.8	-0.112845	0.365368	0.475364	0.0755996	0.762992	1.2412	0.480659	0.0896284	0.480659	0.0896284	0.598263	[-0.08,1.04]	chr19	830	-1	1162	567	202	393	ZNF428	TAG	TAGG
1298	ENST00000301011.9	0.0115635	-0.134399	-0.147611	0.408886	0.392281	0.246319	-0.145241	0.480494	-0.145241	0.480494	0.922714	[-0.55,0.26]	chr16	727	1	3729	2862	200	667	ZC3H18	TAG	TAGG
1299	ENST00000301019.9	-0.0756599	0.0353452	0.109857	0.498995	1.13374	1.24474	0.111661	0.473914	0.109857	0.498995	0.923469	[-0.21,0.42]	chr16	735	1	2664	1641	43	980	CDT1	TGA	TGAG
1300	ENST00000301021.7	-0.0832799	-0.144359	-0.0625469	0.711957	0.464992	0.403913	-0.0605134	0.756091	-0.0605134	0.756091	0.984754	[-0.44,0.32]	chr16	738	1	2215	423	65	1727	TRAPPC2L	TGA	TGAG
1301	ENST00000301072.10	-0.0441395	-0.215987	-0.171886	0.0114355	0.830014	0.658167	-0.171709	0.0209059	-0.171709	0.0209059	0.296371	[-0.32,-0.03]	chr12	322	1	3001	1350	275	1376	TUBA1C	TAA	TAAC
1302	ENST00000301180.10	-0.0657287	-0.133761	-0.0692614	0.688261	-0.467546	-0.535579	-0.0671856	0.757715	-0.0671856	0.757715	0.984754	[-0.49,0.36]	chr12	349	1	8705	4731	156	3818	DIP2B	TAA	TAAC
1303	ENST00000301244.12	-0.0163914	0.416727	0.431111	0.0711558	0.00544302	0.438562	0.436097	0.126601	0.436097	0.126601	0.674746	[-0.12,1]	chr19	684	1	1688	759	320	609	SPINT2	TGA	TGAC
1304	ENST00000301264.7	-0.0896986	0.142033	0.22947	0.321085	0.887581	1.11931	0.233177	0.329832	0.233177	0.329832	0.853516	[-0.24,0.71]	chr19	120	-1	2105	1365	93	647	DAPK3	TAG	TAGG
1305	ENST00000301280.10	-0.0144841	-0.15706	-0.143355	0.321672	-0.377643	-0.520218	-0.141947	0.429177	-0.141947	0.429177	0.907408	[-0.49,0.21]	chr19	136	1	3366	2871	123	372	CHAF1A	TGA	TGAG
1306	ENST00000301305.7	-0.125844	-0.0777217	0.0430079	0.944509	2.80282	2.85095	0.0493651	0.849362	0.0430079	0.944509	0.995968	[-0.78,0.77]	chr8	596	-1	2174	1944	106	124	SLC39A4	TGA	TGAT
1307	ENST00000301327.5	-0.0730264	0.270969	0.34099	0.162365	0.724101	1.0681	0.345975	0.164419	0.345975	0.164419	0.739564	[-0.14,0.84]	chr8	604	1	1552	1239	264	49	MFSD3	TGA	TGAG
1308	ENST00000301329.10	-0.0508028	-0.103861	-0.054436	0.724123	0.254012	0.200953	-0.052695	0.770916	-0.052695	0.770916	0.985535	[-0.4,0.3]	chr17	7	-1	2059	897	86	1076	GLOD4	TAA	TAAC
1309	ENST00000301364.9	0.0436543	0.101415	0.0571476	0.599254	-0.222523	-0.164762	0.0583042	0.66244	0.0583042	0.66244	0.967564	[-0.2,0.32]	chr17	33	-1	5188	2415	1080	1693	TSR1	TAA	TAAT
1310	ENST00000301396.8	0.0419814	-0.257513	-0.300637	0.0287535	1.07593	0.776441	-0.299294	0.0295497	-0.299294	0.0295497	0.350539	[-0.57,-0.03]	chr17	69	-1	3673	3543	76	54	PELP1	TAG	TAGC
1311	ENST00000301457.2	-0.0883105	-0.0163153	0.0708358	0.654814	1.12931	1.2013	0.0723455	0.645315	0.0708358	0.654814	0.965534	[-0.24,0.37]	chr19	230	-1	601	342	38	221	NDUFA7	TGA	TGAC
1312	ENST00000301458.10	0.13687	-0.112311	-0.250607	0.109051	1.15701	0.907831	-0.248899	0.113528	-0.248899	0.113528	0.644967	[-0.56,0.06]	chr19	229	-1	1253	849	68	336	CD320	TGA	TGAG
1313	ENST00000301522.3	0.0391302	-0.0108375	-0.0502292	0.574863	0.929375	0.879407	-0.0498192	0.589205	-0.0498192	0.589205	0.949655	[-0.23,0.13]	chr19	347	-1	925	597	70	258	PRDX2	TAG	TAGG
1314	ENST00000301585.10	-0.127255	-0.0983695	0.0261528	0.907392	0.674271	0.703157	0.0298619	0.896568	0.0261528	0.907392	0.989633	[-0.4,0.45]	chr17	911	1	894	621	17	256	MRPL58	TGA	TGAA
1315	ENST00000301587.9	-0.0243249	0.130445	0.153968	0.252084	0.406565	0.561335	0.155359	0.299952	0.155359	0.299952	0.848351	[-0.14,0.45]	chr17	913	-1	609	486	54	69	ATP5PD	TAA	TAAA
1316	ENST00000301608.8	0.100579	-0.0631964	-0.16683	0.463614	0.58655	0.422775	-0.16274	0.532727	-0.16274	0.532727	0.933437	[-0.67,0.35]	chr17	943	-1	2215	1983	61	171	ACOX1	TGA	TGAA
1317	ENST00000301634.12	-0.0368444	-0.249899	-0.214315	0.165698	1.24535	1.03229	-0.21283	0.171798	-0.21283	0.171798	0.752267	[-0.52,0.09]	chr17	974	-1	1431	705	58	668	TK1	TGA	TGAG
1318	ENST00000301727.9	0.126356	-0.248678	-0.37876	0.151524	0.728309	0.353275	-0.373899	0.207415	-0.373899	0.207415	0.770804	[-0.95,0.21]	chr16	95	1	2548	2355	23	170	E4F1	TAG	TAGC
1319	ENST00000301729.9	0.0240808	0.0387002	0.012971	0.946294	1.35709	1.37171	0.01526	0.925394	0.012971	0.946294	0.995968	[-0.33,0.35]	chr16	97	-1	1507	909	21	577	ECI1	TAA	TAAC
1320	ENST00000301764.11	-0.0726323	-0.20945	-0.137049	0.0733852	0.610183	0.473365	-0.136753	0.098564	-0.136753	0.098564	0.611551	[-0.3,0.03]	chr11	491	-1	4506	3423	398	685	DDB1	TAG	TAGC
1321	ENST00000301785.6	-0.152076	0.00232059	0.153644	0.261626	0.951039	1.10543	0.154896	0.267151	0.154896	0.267151	0.817088	[-0.12,0.43]	chr11	532	-1	5229	2244	316	2669	HNRNPUL2	TGA	TGAA
1322	ENST00000301788.12	0.0991282	0.0455967	-0.0546648	0.700763	0.87949	0.825958	-0.0529815	0.732657	-0.0529815	0.732657	0.980673	[-0.36,0.25]	chr11	535	1	791	519	69	203	POLR2G	TGA	TGAG
1323	ENST00000301821.11	0.0110722	-0.127445	-0.138871	0.120511	-2.9359	-3.07442	-0.138309	0.246829	-0.138309	0.246829	0.80644	[-0.37,0.1]	chr3	170	1	1140	888	78	174	RPSA	TAA	TAAG
1324	ENST00000301838.4	-0.141718	-0.109776	0.0295595	0.900672	0.0393434	0.0712848	0.0334494	0.9038	0.0334494	0.9038	0.989633	[-0.52,0.59]	chr11	720	1	1841	627	297	917	FADD	TGA	TGAT
1325	ENST00000301905.9	-0.00754412	-0.190911	-0.185187	0.322696	0.439701	0.256334	-0.182743	0.399747	-0.182743	0.399747	0.895855	[-0.61,0.24]	chr8	149	-1	1836	969	186	681	PBK	TAG	TAGT
1326	ENST00000302165.5	-0.104754	0.254137	0.356515	0.125594	0.896695	1.25559	0.360543	0.129097	0.360543	0.129097	0.681006	[-0.11,0.83]	chr19	900	-1	2534	1755	367	412	IRF2BP1	TAG	TAGG
1327	ENST00000302174.9	-0.0428322	0.495709	0.53563	0.0278259	0.253402	0.791942	0.54126	0.0514072	0.54126	0.0514072	0.476065	[0,1.1]	chr4	369	1	2820	1053	333	1434	NUDT9	TAG	TAGC
1328	ENST00000302190.9	0.0333977	-0.426031	-0.461298	0.018302	-0.166477	-0.625906	-0.459184	0.0555549	-0.459184	0.0555549	0.487123	[-0.93,0.01]	chr8	402	1	3307	606	459	2242	SDC2	TAA	TAAA
1329	ENST00000302274.7	0.0114585	-0.0332348	-0.0465488	0.833426	-0.686659	-0.731353	-0.0431948	0.881626	-0.0431948	0.881626	0.989347	[-0.6,0.52]	chr4	457	-1	3090	798	341	1951	ELOVL6	TAG	TAGT
1330	ENST00000302279.8	-0.0191352	0.281105	0.298433	0.14039	-0.626368	-0.326128	0.302442	0.249086	0.302442	0.249086	0.80891	[-0.21,0.82]	chr8	234	1	1667	1140	24	503	FNTA	TAA	TAAC
1331	ENST00000302313.10	0.0444217	0.0889548	0.0432986	0.78896	-0.728898	-0.684365	0.0455432	0.825631	0.0455432	0.825631	0.988946	[-0.37,0.46]	chr3	162	1	3965	2034	10	1921	WDR48	TGA	TGAA
1332	ENST00000302362.11	0.0267083	0.337337	0.309224	0.108704	-0.872715	-0.562086	0.312284	0.217887	0.312284	0.217887	0.780814	[-0.19,0.82]	chr17	362	-1	868	555	45	268	COPRS	TGA	TGAG
1333	ENST00000302386.10	0.0826181	-0.123097	-0.206748	0.140959	0.812936	0.60722	-0.205186	0.183868	-0.205186	0.183868	0.752562	[-0.51,0.1]	chr17	128	-1	1319	354	119	846	GABARAP	TGA	TGAA
1334	ENST00000302418.5	-0.00907936	0.0264356	0.0350559	0.717041	-0.882917	-0.847402	0.0357311	0.770222	0.0357311	0.770222	0.985535	[-0.21,0.28]	chr10	131	-1	5866	2892	452	2522	KIF5B	TAA	TAAT
1335	ENST00000302422.4	-0.113982	-0.147596	-0.0351425	0.841759	1.28196	1.24835	-0.0330789	0.856934	-0.0330789	0.856934	0.988946	[-0.39,0.33]	chr17	142	-1	446	342	13	91	TMEM256	TGA	TGAG
1336	ENST00000302445.7	0.0356349	0.0580159	0.0220459	0.826489	-0.0941998	-0.0718189	0.0225813	0.847568	0.0225813	0.847568	0.988946	[-0.21,0.26]	chr16	664	-1	2005	1794	40	171	KARS	TAG	TAGA
1337	ENST00000302450.11	0.0930299	0.26513	0.169625	0.467633	-0.321238	-0.149137	0.174299	0.552011	0.174299	0.552011	0.939217	[-0.4,0.76]	chr2	564	-1	4723	2238	11	2474	CKAP2L	TAA	TAAT
1338	ENST00000302503.8	-0.0547136	0.103352	0.157501	0.152194	-0.155582	0.00248375	0.158551	0.231041	0.158551	0.231041	0.7959	[-0.1,0.42]	chr11	364	-1	2522	912	94	1516	MTCH2	TGA	TGAA
1339	ENST00000302506.7	-0.0842273	0.0142449	0.0976171	0.468675	-0.97059	-0.872118	0.0990311	0.570756	0.0990311	0.570756	0.945718	[-0.24,0.45]	chr3	253	-1	3783	1575	409	1799	CDC25A	TGA	TGAG
1340	ENST00000302516.10	0.0105915	-0.00884037	-0.0195904	0.805422	0.159502	0.140071	-0.0191865	0.832909	-0.0191865	0.832909	0.988946	[-0.2,0.16]	chr16	620	1	9692	3654	183	5855	SF3B3	TGA	TGAG
1341	ENST00000302631.8	-0.0335658	0.148464	0.181076	0.213435	0.551826	0.733855	0.182702	0.253868	0.182702	0.253868	0.809647	[-0.13,0.5]	chr1	1203	-1	1545	1044	209	292	SCAMP3	TGA	TGAC
1342	ENST00000302746.11	0.0868776	-0.294937	-0.382538	0.000628629	0.821646	0.439832	-0.38171	0.00146245	-0.38171	0.00146245	0.0625849	[-0.62,-0.15]	chr3	398	-1	1507	1080	23	404	PDHB	TAG	TAGT
1343	ENST00000302759.10	0.0395713	0.178165	0.138039	0.250159	0.120606	0.2592	0.139054	0.321583	0.139054	0.321583	0.853516	[-0.14,0.42]	chr2	549	-1	3507	3258	119	130	BUB1	TAA	TAAA
1344	ENST00000302763.12	0.054968	-0.121334	-0.176752	0.108803	0.667671	0.491369	-0.176035	0.152366	-0.176035	0.152366	0.717936	[-0.42,0.07]	chr5	463	1	3754	2721	88	945	CTNNA1	TAA	TAAG
1345	ENST00000302764.9	-0.0213628	0.408849	0.4288	0.022362	-0.364698	0.0655133	0.432062	0.0661717	0.432062	0.0661717	0.524453	[-0.03,0.9]	chr5	650	-1	7967	474	52	7441	NUDCD2	TAA	TAAC
1346	ENST00000302787.3	-0.118013	-0.0669158	0.0503911	0.715524	-0.316373	-0.265276	0.0516099	0.758515	0.0516099	0.758515	0.984754	[-0.28,0.39]	chr4	29	-1	5371	2220	206	2945	LETM1	TAG	TAGA
1347	ENST00000303071.10	0.0218081	0.32575	0.302695	0.0913002	-0.429328	-0.125387	0.305499	0.174074	0.305499	0.174074	0.752267	[-0.14,0.75]	chr21	100	-1	2500	1701	43	756	DONSON	TGA	TGAA
1348	ENST00000303127.12	0.0132701	-0.0992634	-0.113075	0.287514	0.692449	0.579916	-0.112321	0.326264	-0.112321	0.326264	0.853516	[-0.34,0.11]	chr5	719	-1	1611	1071	21	519	LMAN2	TGA	TGAG
1349	ENST00000303151.5	-0.0312239	0.47038	0.500446	0.00267007	-0.545969	-0.0443649	0.503173	0.0182313	0.503173	0.0182313	0.277345	[0.08,0.93]	chr7	481	1	850	423	194	233	POP7	TAA	TAAT
1350	ENST00000303204.9	-0.0786206	1.01105	1.08919	4.64599e-15	-3.32039	-2.23073	1.09199	5.7374e-07	1.09199	5.7374e-07	0.000175144	[0.66,1.53]	chr5	718	1	1226	660	187	379	PRELID1	TAG	TAGC
1351	ENST00000303210.9	-0.0592359	0.248409	0.306787	0.0203427	0.879925	1.18757	0.307972	0.0212858	0.307972	0.0212858	0.298067	[0.05,0.57]	chr7	479	1	1664	1023	273	368	GNB2	TAA	TAAT
1352	ENST00000303383.8	0.0494382	-0.0865182	-0.137727	0.481888	0.255215	0.119259	-0.135013	0.562059	-0.135013	0.562059	0.945078	[-0.59,0.32]	chr16	429	-1	5177	2019	20	3138	SHCBP1	TGA	TGAC
1353	ENST00000303400.9	0.101196	-0.0897705	-0.192804	0.268913	0.67568	0.484713	-0.190148	0.321329	-0.190148	0.321329	0.853516	[-0.56,0.19]	chr4	22	1	2182	1191	23	968	MAEA	TAG	TAGG
1354	ENST00000303407.11	-0.0500589	0.121844	0.170517	0.414814	-0.568967	-0.397065	0.173333	0.51895	0.173333	0.51895	0.927676	[-0.36,0.71]	chr9	614	-1	5652	2181	186	3285	BRD3	TGA	TGAA
1355	ENST00000303436.11	0.00336364	-0.205673	-0.209751	0.0837426	0.234998	0.0259613	-0.208608	0.139555	-0.208608	0.139555	0.696861	[-0.48,0.07]	chr3	391	-1	1596	543	204	849	ARF4	TAA	TAAA
1356	ENST00000303538.13	0.00056607	0.0195074	0.018325	0.862396	-0.642489	-0.623547	0.0193232	0.884222	0.0193232	0.884222	0.989347	[-0.25,0.29]	chr4	158	-1	7131	4014	495	2622	PDS5A	TAA	TAAA
1357	ENST00000303575.9	0.0107669	0.0551937	0.044093	0.685395	-0.777243	-0.732817	0.0447776	0.745888	0.0447776	0.745888	0.982424	[-0.23,0.32]	chr14	374	-1	4109	660	33	3416	TMED10	TAA	TAAT
1358	ENST00000303577.6	-0.123161	-0.0246453	0.0979659	0.396312	1.98486	2.08338	0.0986401	0.29833	0.0979659	0.396312	0.895855	[-0.13,0.32]	chr2	321	1	1750	1071	290	389	PCBP1	TAG	TAGA
1359	ENST00000303622.13	0.04177	-0.0330753	-0.076108	0.688762	-1.40125	-1.4761	-0.0734429	0.776488	-0.0734429	0.776488	0.98647	[-0.58,0.43]	chr14	517	1	3283	2190	489	604	MARK3	TAA	TAAC
1360	ENST00000303635.12	-0.0509698	-0.489216	-0.441712	0.0666287	0.178941	-0.259305	-0.437504	0.118378	-0.437504	0.118378	0.657831	[-0.99,0.11]	chr1	96	1	8314	5022	77	3215	CAMTA1	TGA	TGAA
1361	ENST00000303731.8	-0.144332	0.14336	0.286368	0.0667069	0.679968	0.96766	0.288496	0.0791869	0.288496	0.0791869	0.566557	[-0.03,0.61]	chr17	172	-1	811	438	116	257	TRAPPC1	TGA	TGAA
1362	ENST00000303887.9	0.0371172	-0.0382476	-0.0755665	0.302931	0.710772	0.635407	-0.0752097	0.341757	-0.0752097	0.341757	0.858424	[-0.23,0.08]	chr7	450	-1	2957	2160	646	151	MCM7	TGA	TGAT
1363	ENST00000303904.8	-0.0829558	0.1059	0.188018	0.151534	1.19335	1.38221	0.189214	0.134902	0.188018	0.151534	0.7165	[-0.07,0.44]	chr7	449	1	1404	984	22	398	COPS6	TGA	TGAT
1364	ENST00000303991.5	0.0229361	0.125304	0.10035	0.664368	-0.070865	0.0315024	0.104567	0.712862	0.104567	0.712862	0.977542	[-0.46,0.67]	chr5	706	-1	4234	3027	201	1006	GPRIN1	TGA	TGAT
1365	ENST00000304043.9	0.0463728	0.0927809	0.0459971	0.644751	0.0881622	0.13457	0.0468461	0.689019	0.0468461	0.689019	0.97424	[-0.18,0.28]	chr5	390	-1	1081	381	280	420	HINT1	TAA	TAAG
1366	ENST00000304218.5	-0.0965127	-0.166165	-0.0696685	0.231174	2.18707	2.11741	-0.0695839	0.204432	-0.0696685	0.231174	0.7959	[-0.18,0.04]	chr6	116	1	754	660	37	57	HIST1H1E	TAG	TAGA
1367	ENST00000304312.5	0.0376692	-0.0475292	-0.0860856	0.506373	0.289043	0.203844	-0.0847666	0.572568	-0.0847666	0.572568	0.945718	[-0.38,0.21]	chr4	8	-1	303	210	29	64	ATP5ME	TGA	TGAG
1368	ENST00000304330.9	0.113627	-0.0894699	-0.205543	0.348007	0.673742	0.470645	-0.201968	0.414965	-0.201968	0.414965	0.903915	[-0.68,0.28]	chr15	104	-1	4663	4182	115	366	RPAP1	TAG	TAGG
1369	ENST00000304414.12	-0.0402424	-0.189964	-0.150156	0.179733	-0.533832	-0.683553	-0.149312	0.282169	-0.149312	0.282169	0.833928	[-0.42,0.12]	chr16	238	-1	2278	612	83	1583	ARL6IP1	TGA	TGAT
1370	ENST00000304478.9	-0.00823777	0.106468	0.112558	0.601026	0.449828	0.564534	0.11582	0.625704	0.11582	0.625704	0.956441	[-0.35,0.59]	chr17	8	1	1729	1263	26	440	MRM3	TGA	TGAG
1371	ENST00000304543.9	0.0158929	-0.200258	-0.218127	0.293742	-0.840882	-1.05703	-0.2151	0.42706	-0.2151	0.42706	0.906179	[-0.74,0.32]	chrX	108	1	2996	2418	254	324	ZFX	TAA	TAAC
1372	ENST00000304567.10	0.0528659	-0.136204	-0.189472	0.0653947	0.346548	0.157479	-0.188839	0.106415	-0.188839	0.106415	0.631135	[-0.42,0.04]	chr2	34	1	3258	1170	60	2028	RRM2	TAA	TAAA
1373	ENST00000304658.9	-0.0854877	0.503418	0.588476	1.86811e-05	-1.64054	-1.05163	0.590052	0.00213379	0.590052	0.00213379	0.0769341	[0.21,0.97]	chr16	313	-1	4422	3378	501	543	XPO6	TAG	TAGG
1374	ENST00000304734.9	0.0230766	-0.174462	-0.198096	0.107088	-2.37088	-2.56842	-0.197165	0.239983	-0.197165	0.239983	0.803276	[-0.52,0.13]	chr6	412	1	3769	768	229	2772	RPL7L1	TAG	TAGA
1375	ENST00000304758.5	-0.0218669	-0.176248	-0.154698	0.0823951	-0.858873	-1.01325	-0.1543	0.162757	-0.1543	0.162757	0.737154	[-0.37,0.06]	chrX	509	-1	6888	2028	796	4064	AMOT	TAA	TAAA
1376	ENST00000304786.11	0.106042	0.0786996	-0.0277107	0.788827	-1.9903	-2.01764	-0.0267896	0.847624	-0.0267896	0.847624	0.988946	[-0.3,0.25]	chr1	1719	1	1480	261	112	1107	SRP9	TGA	TGAA
1377	ENST00000304858.7	-0.0383648	-0.111219	-0.073111	0.360731	0.420519	0.347665	-0.072674	0.405753	-0.072674	0.405753	0.89973	[-0.24,0.1]	chr5	415	1	4774	2523	238	2013	HSPA4	TGA	TGAT
1378	ENST00000304863.6	0.0545081	-0.0445499	-0.0996415	0.42918	-0.0453569	-0.144415	-0.0986833	0.518824	-0.0986833	0.518824	0.927676	[-0.4,0.2]	chr19	556	-1	3086	825	33	2228	UQCRFS1	TAA	TAAG
1379	ENST00000304895.9	0.0223296	0.00631251	-0.0186131	0.931089	0.313041	0.297024	-0.0142983	0.959109	-0.0142983	0.959109	0.998639	[-0.54,0.52]	chr7	271	-1	2199	1956	30	213	GUSB	TGA	TGAG
1380	ENST00000304952.10	-0.133857	0.829458	0.9609	0.00207947	1.92815	2.89146	0.965272	1.99837e-05	0.9609	0.00207947	0.0755705	[0.36,1.51]	chr1	8	-1	899	666	138	95	HES4	TGA	TGAG
1381	ENST00000304979.8	-0.048949	-0.116305	-0.0685864	0.664573	0.455376	0.38802	-0.0667113	0.713347	-0.0667113	0.713347	0.977676	[-0.42,0.29]	chr1	528	1	754	534	24	196	PPIH	TAG	TAGT
1382	ENST00000304987.4	0.0335111	-0.044187	-0.0797347	0.724532	-0.564246	-0.641944	-0.0763501	0.796067	-0.0763501	0.796067	0.987349	[-0.64,0.5]	chr11	931	1	9622	2781	115	6726	SIK2	TAG	TAGT
1383	ENST00000305105.3	-0.0284916	-0.22675	-0.199933	0.239379	0.998383	0.800124	-0.197934	0.268614	-0.197934	0.268614	0.817088	[-0.55,0.15]	chr7	499	1	728	465	31	232	ZNHIT1	TGA	TGAG
1384	ENST00000305135.10	0.0236059	0.38742	0.362636	0.0802073	-1.5355	-1.17169	0.366824	0.207725	0.366824	0.207725	0.770804	[-0.2,0.95]	chr3	863	1	6526	4269	216	2041	YEATS2	TGA	TGAG
1385	ENST00000305188.12	0.0947634	0.0732571	-0.0246906	0.917866	0.141656	0.12015	-0.0196622	0.948674	-0.0196622	0.948674	0.995968	[-0.59,0.56]	chr8	148	1	3922	1806	238	1878	ESCO2	TAA	TAAA
1386	ENST00000305218.8	0.0569098	0.0536907	-0.00340581	0.964813	0.538272	0.535053	-0.00300513	0.972448	-0.00300513	0.972448	0.999541	[-0.18,0.17]	chr11	564	1	2196	1632	147	417	STIP1	TGA	TGAT
1387	ENST00000305264.8	-0.179852	0.833496	1.01257	1.20579e-10	-1.64203	-0.628686	1.01536	5.42474e-06	1.01536	5.42474e-06	0.001035	[0.58,1.46]	chr5	520	-1	1933	1287	59	587	HDAC3	TAA	TAAG
1388	ENST00000305321.4	-0.0221972	-0.0356161	-0.0151698	0.927202	0.771581	0.758162	-0.0128002	0.948176	-0.0128002	0.948176	0.995968	[-0.39,0.36]	chr16	366	-1	1012	459	513	40	BOLA2B	TGA	TGAG
1389	ENST00000305494.6	-0.0182813	0.0746008	0.0901837	0.698018	-0.446334	-0.353452	0.0950541	0.745299	0.0950541	0.745299	0.982424	[-0.48,0.68]	chr11	830	1	8980	1377	112	7491	TMEM135	TGA	TGAA
1390	ENST00000305510.4	-0.108871	0.22085	0.327392	0.145635	-0.0101609	0.31956	0.331743	0.219263	0.331743	0.219263	0.780814	[-0.2,0.87]	chr2	468	1	4900	2124	10	2766	CNNM3	TAA	TAAC
1391	ENST00000305533.10	-0.0714203	-0.133964	-0.0653133	0.759427	1.10578	1.04323	-0.0615779	0.784576	-0.0615779	0.784576	0.987243	[-0.5,0.38]	chr3	347	-1	1614	1050	142	422	TWF2	TAG	TAGG
1392	ENST00000305536.11	0.109762	0.380401	0.268902	0.207487	-0.95207	-0.681431	0.272954	0.341618	0.272954	0.341618	0.858424	[-0.29,0.85]	chrX	586	1	1823	969	46	808	RBMX2	TGA	TGAA
1393	ENST00000305747.10	-0.0945127	0.180278	0.273991	0.111155	-1.60405	-1.32926	0.276505	0.245471	0.276505	0.245471	0.80644	[-0.19,0.75]	chr2	737	1	7217	1155	587	5475	CERS6	TAA	TAAT
1394	ENST00000305784.7	0.0147599	0.191191	0.17501	0.332692	0.263102	0.439533	0.177701	0.401431	0.177701	0.401431	0.896205	[-0.24,0.6]	chr2	1145	-1	1051	639	32	380	DTYMK	TGA	TGAC
1395	ENST00000305877.12	0.0307349	0.0558311	0.0240529	0.88497	-1.40806	-1.38296	0.0260431	0.90618	0.0260431	0.90618	0.989633	[-0.43,0.48]	chr22	78	1	7082	3816	751	2515	BCR	TAA	TAAA
1396	ENST00000305921.7	-0.144138	0.254198	0.396402	0.0650008	-0.628443	-0.230107	0.400462	0.145999	0.400462	0.145999	0.708245	[-0.14,0.95]	chr17	807	1	4778	1818	232	2728	PPM1D	TGA	TGAA
1397	ENST00000305963.2	-0.025143	0.0623165	0.0867267	0.599012	-1.52365	-1.43619	0.0885306	0.69232	0.0885306	0.69232	0.97424	[-0.35,0.53]	chrX	629	-1	3738	396	388	2954	MMGT1	TAA	TAAG
1398	ENST00000305997.8	-0.0478184	0.31161	0.358619	0.0568292	-2.13736	-1.77793	0.361461	0.181971	0.361461	0.181971	0.752562	[-0.17,0.9]	chr2	23	-1	7622	1563	70	5989	MBOAT2	TGA	TGAT
1399	ENST00000306014.9	-0.0316576	-0.0827323	-0.0520224	0.708985	0.523309	0.472234	-0.0507359	0.747852	-0.0507359	0.747852	0.982892	[-0.36,0.26]	chr12	795	-1	4377	2646	28	1703	DDX54	TGA	TGAG
1400	ENST00000306024.4	-0.0774214	0.117963	0.194719	0.126229	-0.0949053	0.100479	0.195968	0.197486	0.195968	0.197486	0.761825	[-0.1,0.5]	chr3	70	1	3359	309	44	3006	LSM3	TGA	TGAA
1401	ENST00000306077.4	-0.0570458	-0.178763	-0.123003	0.481531	-0.16272	-0.284437	-0.120888	0.571148	-0.120888	0.571148	0.945718	[-0.54,0.3]	chr3	68	1	3341	1203	254	1884	TMEM43	TGA	TGAA
1402	ENST00000306107.9	-0.0129492	0.27438	0.285937	0.110076	-1.15351	-0.866178	0.288945	0.230072	0.288945	0.230072	0.7959	[-0.18,0.77]	chr3	493	1	4701	1752	500	2449	ALCAM	TAA	TAAG
1403	ENST00000306121.8	-0.0285278	0.293543	0.320216	0.152734	-0.705796	-0.383725	0.324799	0.265172	0.324799	0.265172	0.817088	[-0.25,0.91]	chr1	834	1	1736	1356	11	369	SNX7	TAA	TAAT
1404	ENST00000306125.12	-0.0632052	-0.179429	-0.116952	0.321526	0.00124908	-0.114975	-0.115935	0.410016	-0.115935	0.410016	0.901238	[-0.39,0.16]	chr3	280	-1	2449	2328	24	97	QARS	TGA	TGAG
1405	ENST00000306185.7	0.148524	-0.165441	-0.314883	0.0296184	0.963944	0.649979	-0.31349	0.0452148	-0.31349	0.0452148	0.451065	[-0.62,-0.01]	chr8	478	-1	1086	537	292	257	MRPL13	TAA	TAAG
1406	ENST00000306193.8	-0.0196091	-0.143699	-0.125943	0.555535	-0.361504	-0.485594	-0.123107	0.648802	-0.123107	0.648802	0.964659	[-0.65,0.41]	chr4	632	-1	3440	714	166	2560	CBR4	TAA	TAAT
1407	ENST00000306368.8	-0.0101254	-0.0242742	-0.0160154	0.930694	0.769482	0.755333	-0.013481	0.951402	-0.013481	0.951402	0.996676	[-0.43,0.41]	chr2	413	1	569	462	30	77	RNF181	TGA	TGAG
1408	ENST00000306378.11	0.0170119	-0.160527	-0.178695	0.212935	-0.50761	-0.685149	-0.177018	0.318906	-0.177018	0.318906	0.85346	[-0.52,0.17]	chr17	862	1	11075	8763	222	2090	BPTF	TAA	TAAA
1409	ENST00000306434.8	-0.0329555	-0.151364	-0.118881	0.24481	0.0378725	-0.0805364	-0.118263	0.324146	-0.118263	0.324146	0.853516	[-0.35,0.12]	chr2	409	1	2817	1188	120	1509	MAT2A	TGA	TGAA
1410	ENST00000306442.4	-0.135089	0.0941793	0.226857	0.299186	0.663136	0.892404	0.230767	0.320318	0.230767	0.320318	0.853516	[-0.22,0.69]	chr5	368	-1	1380	639	116	625	PPIC	TGA	TGAC
1411	ENST00000306627.7	-0.00629437	0.133751	0.139432	0.258195	-0.336598	-0.196552	0.140554	0.352264	0.140554	0.352264	0.862115	[-0.16,0.44]	chr3	102	1	1511	582	219	710	UBE2E1	TAA	TAAA
1412	ENST00000306721.8	-0.0359188	0.110149	0.145049	0.307481	-0.287401	-0.141333	0.146808	0.403263	0.146808	0.403263	0.89725	[-0.2,0.49]	chr2	769	1	2778	1353	92	1333	CDCA7	TAA	TAAT
1413	ENST00000306749.4	0.0412092	-0.189715	-0.23123	0.181192	2.22052	1.9896	-0.230903	0.000792106	-0.23123	0.181192	0.752562	[-0.61,0.11]	chr17	1043	-1	8464	7536	123	805	FASN	TAG	TAGG
1414	ENST00000306801.8	0.03955	-0.0653802	-0.107357	0.614728	0.0104527	-0.0944777	-0.103794	0.691333	-0.103794	0.691333	0.97424	[-0.61,0.41]	chr17	1001	1	6838	4008	792	2038	RPTOR	TAG	TAGC
1415	ENST00000306869.6	-0.0458179	-0.129771	-0.0854555	0.608149	0.779368	0.695415	-0.083321	0.643942	-0.083321	0.643942	0.962968	[-0.44,0.27]	chr17	1039	-1	887	735	50	102	DCXR	TGA	TGAG
1416	ENST00000306897.9	-0.0428082	0.897497	0.938714	2.33941e-06	-0.664129	0.276176	0.943282	0.000201042	0.943282	0.000201042	0.0135378	[0.44,1.45]	chr17	1038	1	1038	579	84	375	RAC3	TAG	TAGA
1417	ENST00000306917.5	-0.0933827	0.375985	0.468494	0.00835228	-2.55885	-2.08948	0.471664	0.0704959	0.471664	0.0704959	0.537183	[-0.04,0.99]	chr15	304	1	7177	1884	673	4620	FEM1B	TAA	TAAG
1418	ENST00000306984.7	0.11593	0.100038	-0.018059	0.930796	0.679123	0.66323	-0.0146028	0.953869	-0.0146028	0.953869	0.997552	[-0.49,0.47]	chr7	189	-1	7661	540	85	7036	MPLKIP	TAA	TAAC
1419	ENST00000307017.8	-0.0149056	0.164142	0.177526	0.358806	-1.13317	-0.954118	0.180446	0.484328	0.180446	0.484328	0.922714	[-0.33,0.7]	chr4	540	1	7009	3129	506	3374	USP38	TGA	TGAT
1420	ENST00000307076.8	-0.025835	0.444927	0.469905	0.000771713	-0.994513	-0.523751	0.471713	0.0110509	0.471713	0.0110509	0.213843	[0.11,0.84]	chr3	357	-1	2047	1563	401	83	NT5DC2	TGA	TGAG
1421	ENST00000307102.9	-0.0897871	-0.058382	0.030046	0.853833	-0.11263	-0.0812248	0.0323525	0.868587	0.0323525	0.868587	0.989347	[-0.36,0.42]	chr15	290	1	3410	1182	531	1697	MAP2K1	TAA	TAAG
1422	ENST00000307296.8	0.0423732	-0.0432275	-0.086259	0.425153	0.47778	0.392179	-0.0854106	0.482472	-0.0854106	0.482472	0.922714	[-0.32,0.15]	chr3	137	1	5884	2607	99	3178	PDCD6IP	TAA	TAAT
1423	ENST00000307365.4	-0.0951235	-0.418603	-0.324897	0.043677	0.395447	0.0719673	-0.323327	0.0586182	-0.323327	0.0586182	0.494803	[-0.66,0.01]	chr10	290	1	1744	699	197	848	DDIT4	TGA	TGAA
1424	ENST00000307422.9	-0.0287364	0.255666	0.283359	0.0715997	1.39126	1.67566	0.284833	0.0552002	0.283359	0.0715997	0.542806	[-0.03,0.58]	chr19	271	1	1320	936	154	230	MRPL4	TGA	TGAT
1425	ENST00000307602.9	-0.0111183	-0.0298546	-0.0198626	0.907994	-0.619879	-0.638615	-0.0175673	0.937441	-0.0175673	0.937441	0.995968	[-0.45,0.42]	chr8	233	1	14348	2157	154	12037	HOOK3	TAG	TAGA
1426	ENST00000307630.5	0.0100457	-0.0840668	-0.0946469	0.387119	-0.776511	-0.870624	-0.093761	0.500581	-0.093761	0.500581	0.923469	[-0.37,0.18]	chr7	332	-1	3705	744	183	2778	YWHAG	TAA	TAAG
1427	ENST00000307712.11	-0.0772393	-0.00853472	0.0680588	0.541826	-0.148566	-0.0798616	0.0691427	0.606982	0.0691427	0.606982	0.953842	[-0.2,0.33]	chr14	169	-1	3843	2298	225	1320	SEC23A	TGA	TGAA
1428	ENST00000307720.4	-0.00243422	0.0590027	0.0602444	0.714004	0.144289	0.205726	0.0624664	0.746109	0.0624664	0.746109	0.982424	[-0.32,0.45]	chr4	605	-1	1830	1113	108	609	PPID	TAG	TAGA
1429	ENST00000307741.11	-0.00408329	0.188801	0.19156	0.230111	0.0811447	0.274029	0.193746	0.301085	0.193746	0.301085	0.848933	[-0.17,0.56]	chr19	87	1	4761	2070	160	2531	THOP1	TGA	TGAG
1430	ENST00000307808.10	-0.0100396	0.174024	0.182602	0.413951	-1.0854	-0.901337	0.186097	0.53448	0.186097	0.53448	0.933437	[-0.4,0.79]	chr4	365	1	9390	3633	420	5337	AFF1	TAA	TAAT
1431	ENST00000307877.7	0.0417676	0.00719176	-0.0353797	0.819792	1.04932	1.01474	-0.0341311	0.843008	-0.0341311	0.843008	0.988946	[-0.37,0.3]	chr17	947	-1	2831	1884	26	921	SRP68	TAA	TAAC
1432	ENST00000307897.10	0.105372	-0.210909	-0.317526	0.05438	-0.448646	-0.764926	-0.31572	0.12656	-0.31572	0.12656	0.674746	[-0.72,0.09]	chr15	293	1	3595	1776	13	1806	ZWILCH	TGA	TGAA
1433	ENST00000307961.11	0.00634146	-0.0822024	-0.0887261	0.128114	-1.27298	-1.36152	-0.0884283	0.193061	-0.0884283	0.193061	0.758005	[-0.22,0.04]	chr15	292	-1	2741	1284	65	1392	RPL4	TAA	TAAA
1434	ENST00000308020.6	-0.0148982	-0.00678247	0.00594952	0.979248	0.124552	0.132668	0.00961395	0.967512	0.00594952	0.979248	0.999541	[-0.42,0.43]	chr11	16	1	2458	1464	177	817	PTDSS2	TGA	TGAC
1435	ENST00000308025.8	0.100067	0.107523	0.00685411	0.958163	-0.951413	-0.943957	0.0084165	0.961038	0.0084165	0.961038	0.999	[-0.35,0.37]	chr12	309	-1	3256	2463	80	713	DDX23	TGA	TGAC
1436	ENST00000308271.13	-0.00471467	0.15642	0.16024	0.303987	-0.0729394	0.0881951	0.161814	0.388103	0.161814	0.388103	0.886712	[-0.21,0.53]	chr1	259	-1	4595	3108	649	838	USP48	TAA	TAAT
1437	ENST00000308275.8	-0.0284709	0.280475	0.307996	0.0784695	-1.06516	-0.756215	0.310736	0.185621	0.310736	0.185621	0.75264	[-0.15,0.78]	chr15	379	1	10707	1212	86	9409	FBXO22	TAA	TAAT
1438	ENST00000308317.10	0.0909284	0.0898822	-0.00300093	0.984406	0.344219	0.343173	0	0.997435	0	0.997435	0.999541	[-0.46,0.47]	chr14	170	1	1420	843	83	494	GEMIN2	TGA	TGAT
1439	ENST00000308330.3	0.0715135	0.250989	0.178159	0.33303	-0.337964	-0.158488	0.180768	0.426967	0.180768	0.426967	0.906179	[-0.27,0.63]	chr12	559	1	4780	2736	14	2030	LEMD3	TGA	TGAA
1440	ENST00000308360.8	-0.15141	0.0327573	0.183285	0.234784	-0.759083	-0.574916	0.18503	0.351097	0.18503	0.351097	0.861857	[-0.2,0.58]	chr17	319	-1	2529	1668	28	833	PIGS	TGA	TGAG
1441	ENST00000308388.6	-0.0529452	0.0683288	0.118676	0.602245	0.457924	0.579198	0.122583	0.626539	0.122583	0.626539	0.956441	[-0.37,0.63]	chr3	296	-1	1582	1083	223	276	GMPPB	TGA	TGAG
1442	ENST00000308436.11	-0.0251701	-0.00107399	0.020484	0.940375	0.570574	0.59467	0.0259342	0.925125	0.020484	0.940375	0.995968	[-0.49,0.52]	chr11	520	-1	2826	2739	38	49	TUT1	TGA	TGAA
1443	ENST00000308488.10	0.0499731	-0.107817	-0.159259	0.345424	-0.139293	-0.297083	-0.157259	0.444327	-0.157259	0.444327	0.914444	[-0.56,0.25]	chr11	800	-1	11550	4326	303	6921	RSF1	TAA	TAAG
1444	ENST00000308580.12	-0.0416486	-0.235582	-0.195262	0.283095	-0.281877	-0.47581	-0.193234	0.392012	-0.193234	0.392012	0.889947	[-0.63,0.25]	chr15	198	1	8232	1059	258	6915	TMOD3	TAA	TAAG
1445	ENST00000308647.7	0.0177114	0.137843	0.118792	0.479632	0.430923	0.551055	0.120976	0.520794	0.120976	0.520794	0.927676	[-0.25,0.49]	chr1	34	1	2448	1947	116	385	ATAD3B	TAG	TAGG
1446	ENST00000308664.10	-0.0671609	0.0377834	0.104626	0.286046	1.18702	1.29197	0.105047	0.265956	0.104626	0.286046	0.837435	[-0.09,0.29]	chr12	761	1	4453	2994	674	785	ATP2A2	TAA	TAAC
1447	ENST00000308683.3	0.11485	-0.0859399	-0.204047	0.398216	0.892518	0.691728	-0.199685	0.451619	-0.199685	0.451619	0.918681	[-0.72,0.32]	chr5	53	-1	1707	1434	135	138	ZNF622	TGA	TGAG
1448	ENST00000308696.11	0.0777577	-0.0780733	-0.156207	0.120519	0.386527	0.230696	-0.155666	0.172887	-0.155666	0.172887	0.752267	[-0.38,0.07]	chr2	1060	1	3323	2862	159	302	PSMD1	TAA	TAAG
1449	ENST00000308713.9	0.0543689	0.0569626	-0.000640323	0.985531	1.6921	1.6947	0.00378219	0.983458	-0.000640323	0.985531	0.999541	[-0.53,0.5]	chr16	350	-1	3801	2733	528	540	SEZ6L2	TGA	TGAA
1450	ENST00000308736.7	-0.0743122	-0.0483397	0.0245131	0.883589	-0.0647029	-0.0387304	0.0268333	0.893415	0.0268333	0.893415	0.989629	[-0.37,0.43]	chr12	908	-1	4559	3474	109	976	DHX37	TGA	TGAC
1451	ENST00000308775.6	-0.0632551	-0.182637	-0.120506	0.42561	0.608401	0.489019	-0.119032	0.480298	-0.119032	0.480298	0.922714	[-0.45,0.21]	chr3	291	1	5522	2688	418	2416	DAG1	TAA	TAAC
1452	ENST00000308924.8	0.018893	0.00947788	-0.00984712	0.912815	1.14504	1.13563	-0.00924423	0.921371	-0.00924423	0.921371	0.993589	[-0.19,0.18]	chr19	1203	1	1698	1428	40	230	U2AF2	TAG	TAGA
1453	ENST00000308982.12	-0.0767165	0.0972288	0.172116	0.388567	-0.108446	0.0654989	0.175039	0.467417	0.175039	0.467417	0.922714	[-0.3,0.65]	chr3	634	1	2445	1866	72	507	ACAD9	TGA	TGAG
1454	ENST00000308987.6	-0.117805	-0.0466737	0.0699886	0.704178	-1.08916	-1.01803	0.0722262	0.765333	0.0722262	0.765333	0.985229	[-0.41,0.56]	chr1	1186	1	779	240	65	474	CKS1B	TGA	TGAA
1455	ENST00000309061.12	0.168134	-0.424315	-0.595836	0.0137783	0.960691	0.368243	-0.592057	0.0227904	-0.592057	0.0227904	0.308749	[-1.1,-0.08]	chr19	161	-1	2038	1953	22	63	DUS3L	TAG	TAGC
1456	ENST00000309083.7	-0.205961	0.109369	0.313629	0.103875	-0.316991	-0.00166122	0.316661	0.180685	0.316661	0.180685	0.752562	[-0.15,0.79]	chr12	63	1	1181	309	371	501	PTMS	TGA	TGAG
1457	ENST00000309190.9	-0.0094659	0.132175	0.141074	0.323223	-0.997468	-0.855827	0.14242	0.446107	0.14242	0.446107	0.914444	[-0.22,0.51]	chr5	306	1	4282	2061	154	2067	CAST	TAA	TAAA
1458	ENST00000309244.8	-0.0642235	-0.191759	-0.128986	0.410303	1.36731	1.23977	-0.127004	0.414611	-0.127004	0.414611	0.903915	[-0.43,0.18]	chr19	1071	-1	900	768	92	40	ETFB	TGA	TGAG
1459	ENST00000309311.7	0.0146297	-0.211866	-0.226691	0.0046593	0.0682112	-0.158284	-0.226407	6.60517e-05	-0.226691	0.0046593	0.130091	[-0.39,-0.07]	chr19	121	-1	3158	2577	83	498	EEF2	TAG	TAGG
1460	ENST00000309318.8	-0.0196854	0.991255	1.01	7.32886e-07	-3.14523	-2.13429	1.01563	0.0015558	1.01563	0.0015558	0.0650315	[0.38,1.67]	chr11	570	-1	989	444	270	275	PPP1R14B	TGA	TGAC
1461	ENST00000309324.8	-0.00901412	0.0503374	0.057507	0.768061	1.12354	1.18289	0.0602073	0.753694	0.057507	0.768061	0.985535	[-0.32,0.43]	chr19	157	-1	896	357	410	129	MICOS13	TAG	TAGC
1462	ENST00000309340.11	-0.0769435	0.640158	0.715161	0.0017343	-0.976821	-0.25972	0.720871	0.017937	0.720871	0.017937	0.27446	[0.12,1.33]	chr19	65	-1	1744	1245	225	274	MKNK2	TGA	TGAA
1463	ENST00000309352.3	-0.113552	0.0759206	0.188107	0.256136	0.828457	1.01793	0.190317	0.26884	0.190317	0.26884	0.817088	[-0.15,0.53]	chr17	941	-1	1888	1143	538	207	MRPL38	TAA	TAAG
1464	ENST00000309424.7	0.0335721	-0.0404782	-0.0760969	0.718219	-0.133908	-0.207958	-0.0728959	0.782422	-0.0728959	0.782422	0.986886	[-0.58,0.44]	chr19	881	1	3286	1533	488	1265	CD3EAP	TAG	TAGT
1465	ENST00000309428.10	-0.121298	0.374871	0.495047	0.0114585	-1.50304	-1.00687	0.498245	0.0666273	0.498245	0.0666273	0.524453	[-0.03,1.04]	chr17	582	-1	3749	1401	50	2298	RETREG3	TGA	TGAG
1466	ENST00000309451.7	-0.0449151	0.180681	0.22393	0.272622	1.53663	1.76222	0.226613	0.22115	0.22393	0.272622	0.822365	[-0.18,0.61]	chr2	640	-1	599	477	21	101	MZT2A	TAG	TAGG
1467	ENST00000309522.7	-0.0935403	-0.318797	-0.226596	0.219307	1.08913	0.863871	-0.224826	0.253736	-0.224826	0.253736	0.809647	[-0.61,0.16]	chr4	444	1	1912	945	149	818	HADH	TGA	TGAT
1468	ENST00000309558.8	0.0187335	0.134937	0.114559	0.55392	-0.100649	0.015554	0.117507	0.616701	0.117507	0.616701	0.954552	[-0.35,0.59]	chr3	133	-1	4602	1890	13	2699	SUSD5	TAG	TAGG
1469	ENST00000309579.7	-0.00739433	-0.23633	-0.229923	0.0844377	0.227426	-0.00150947	-0.228733	0.135763	-0.228733	0.135763	0.688463	[-0.53,0.07]	chr10	532	-1	364	177	67	120	ATP5MD	TAA	TAAA
1470	ENST00000309594.5	-0.0453958	0.135174	0.179191	0.389625	-0.297914	-0.117345	0.182345	0.486396	0.182345	0.486396	0.922714	[-0.33,0.7]	chr13	17	1	2233	309	65	1859	MRPL57	TAA	TAAT
1471	ENST00000309794.16	-0.073155	0.11349	0.184378	0.389677	-0.441232	-0.254588	0.188425	0.481816	0.188425	0.481816	0.922714	[-0.34,0.72]	chr17	1054	1	3814	1371	63	2380	NARF	TGA	TGAA
1472	ENST00000309863.10	0.0603031	-0.334221	-0.396003	0.0158697	-0.0294589	-0.423983	-0.39425	0.0468243	-0.39425	0.0468243	0.454791	[-0.78,-0.01]	chr2	534	1	7537	5055	714	1768	GCC2	TAG	TAGG
1473	ENST00000309922.7	-0.0435598	-0.108322	-0.0659548	0.656113	0.722315	0.657553	-0.0641397	0.693819	-0.0641397	0.693819	0.97424	[-0.38,0.26]	chr3	485	1	1813	1212	148	453	TRMT10C	TAA	TAAT
1474	ENST00000309971.8	-0.0759084	-0.0372442	0.0375769	0.826453	-0.613753	-0.575089	0.0398094	0.854617	0.0398094	0.854617	0.988946	[-0.39,0.47]	chr9	531	1	3321	2097	106	1118	GLE1	TGA	TGAT
1475	ENST00000310015.11	-0.0432619	0.0348138	0.0770306	0.628889	-1.36694	-1.28887	0.0792259	0.713035	0.0792259	0.713035	0.977542	[-0.35,0.51]	chr2	770	-1	12045	2346	531	9168	SP3	TAA	TAAA
1476	ENST00000310078.12	-0.0303024	-0.048733	-0.0197575	0.911545	-1.14118	-1.15962	-0.0172225	0.941446	-0.0172225	0.941446	0.995968	[-0.47,0.44]	chr2	1039	1	8668	1689	260	6719	AGFG1	TAG	TAGC
1477	ENST00000310118.9	0.0406001	-0.050996	-0.0918302	0.300528	0.380812	0.289216	-0.0914438	0.361059	-0.0914438	0.361059	0.869695	[-0.29,0.1]	chr3	878	1	2913	2727	26	160	PSMD2	TAA	TAAG
1478	ENST00000310144.11	-0.0930508	0.11552	0.207855	0.0877063	0.726335	0.934906	0.208816	0.0993364	0.208816	0.0993364	0.614677	[-0.04,0.46]	chr17	830	1	1331	1221	60	50	PSMC5	TGA	TGAG
1479	ENST00000310164.3	-0.266347	0.0305707	0.294631	0.168544	0.283799	0.580717	0.297979	0.219409	0.297979	0.219409	0.780814	[-0.18,0.78]	chrX	523	1	2197	1209	473	515	ZCCHC12	TAA	TAAG
1480	ENST00000310256.7	0.0902834	-0.197837	-0.289468	0.088461	0.407902	0.119782	-0.287717	0.141021	-0.287717	0.141021	0.699607	[-0.67,0.1]	chr1	1766	1	1428	816	12	600	ARV1	TGA	TGAA
1481	ENST00000310271.6	-0.0502455	0.0577284	0.106514	0.577967	-0.0608933	0.0470805	0.109069	0.640046	0.109069	0.640046	0.959975	[-0.35,0.57]	chr3	345	1	2212	1923	145	144	ALAS1	TGA	TGAG
1482	ENST00000310301.9	0.0252967	-0.112608	-0.139445	0.492934	-0.811526	-0.949431	-0.136889	0.607634	-0.136889	0.607634	0.953842	[-0.65,0.39]	chr7	185	-1	5854	2565	17	3272	VPS41	TAG	TAGC
1483	ENST00000310326.8	0.122385	-0.116665	-0.242345	0.300759	0.974075	0.735025	-0.238257	0.348086	-0.238257	0.348086	0.861857	[-0.73,0.26]	chr7	289	-1	1602	1413	26	163	NSUN5	TGA	TGAC
1484	ENST00000310340.9	-0.0499665	0.0375538	0.084625	0.733093	0.263883	0.351403	0.0895467	0.756289	0.0895467	0.756289	0.984754	[-0.48,0.66]	chr4	5	1	3203	2928	115	160	PIGG	TAG	TAGA
1485	ENST00000310418.8	-0.0881201	0.70523	0.7922	3.56034e-06	-0.313369	0.479981	0.794895	0.000165013	0.794895	0.000165013	0.0118061	[0.38,1.22]	chr5	702	-1	1215	690	206	319	CLTB	TAG	TAGG
1486	ENST00000310421.5	0.047703	-0.28288	-0.332924	0.142373	-0.574341	-0.904925	-0.329827	0.254142	-0.329827	0.254142	0.809647	[-0.89,0.24]	chr8	297	-1	9956	3669	273	6014	VCPIP1	TGA	TGAT
1487	ENST00000310430.11	0.0228774	-0.263919	-0.289071	0.193607	-0.180848	-0.467645	-0.285499	0.297764	-0.285499	0.297764	0.848293	[-0.82,0.25]	chr8	44	1	9622	3984	28	5610	TNKS	TAG	TAGT
1488	ENST00000310441.12	-0.0420342	-0.0730334	-0.0316061	0.77149	0.895124	0.864125	-0.0308768	0.77391	-0.0308768	0.77391	0.98647	[-0.24,0.18]	chrX	731	-1	8876	6108	978	1790	HCFC1	TGA	TGAG
1489	ENST00000310447.10	-0.120527	0.0366463	0.15591	0.390359	0.257969	0.415142	0.157954	0.449002	0.157954	0.449002	0.916324	[-0.25,0.57]	chr7	727	1	4089	1359	105	2625	CASP2	TGA	TGAT
1490	ENST00000310483.10	-0.0175777	0.306995	0.323941	0.0160514	-0.635703	-0.311131	0.325461	0.0605113	0.325461	0.0605113	0.501051	[-0.01,0.67]	chr1	1162	-1	2427	975	466	986	SLC39A1	TAG	TAGG
1491	ENST00000310512.4	-0.0589871	0.0801512	0.137816	0.468575	-0.69719	-0.558052	0.140623	0.56414	0.140623	0.56414	0.945217	[-0.34,0.63]	chr7	466	1	2822	2070	188	564	MEPCE	TAA	TAAG
1492	ENST00000310528.8	0.0184594	0.207666	0.188114	0.25147	-0.697681	-0.508474	0.190607	0.369677	0.190607	0.369677	0.876164	[-0.23,0.61]	chr13	175	1	14131	1002	55	13074	SUGT1	TAA	TAAA
1493	ENST00000310564.10	-0.117011	0.6615	0.777334	0.000369704	-1.49697	-0.718462	0.781944	0.0110786	0.781944	0.0110786	0.213843	[0.18,1.4]	chr7	198	-1	1085	441	319	325	COA1	TAG	TAGA
1494	ENST00000310574.8	-0.139817	0.231568	0.370387	0.0160995	-0.441917	-0.0705323	0.372605	0.0521407	0.372605	0.0521407	0.476065	[0,0.75]	chr2	119	-1	3213	1908	456	849	SLC5A6	TGA	TGAT
1495	ENST00000310614.11	0.0720285	0.0284436	-0.0454109	0.801609	0.482854	0.439269	-0.0426278	0.83918	-0.0426278	0.83918	0.988946	[-0.45,0.37]	chr11	756	1	1536	639	656	241	MRPL48	TAG	TAGC
1496	ENST00000310653.10	-0.0800753	0.185992	0.264632	0.192301	-1.42687	-1.16081	0.268003	0.334727	0.268003	0.334727	0.854469	[-0.28,0.82]	chr11	755	-1	3389	627	502	2260	RAB6A	TAA	TAAT
1497	ENST00000310706.9	0.0518701	0.210225	0.156067	0.538842	1.39311	1.55147	0.160097	0.510679	0.156067	0.538842	0.933437	[-0.34,0.64]	chr17	552	-1	3200	2238	119	843	JUP	TAG	TAGG
1498	ENST00000310776.8	0.0301987	0.108367	0.0768752	0.631628	0.614445	0.692613	0.0787347	0.651739	0.0787347	0.651739	0.964703	[-0.27,0.43]	chr3	698	1	1120	1083	8	29	MRPS22	TAA	TAAA
1499	ENST00000310806.9	-0.0227471	0.00573976	0.0271565	0.880995	-0.65601	-0.627523	0.0298597	0.897047	0.0298597	0.897047	0.989629	[-0.43,0.5]	chr14	183	-1	4577	3399	259	919	MIS18BP1	TAG	TAGT
1500	ENST00000310864.11	0.12405	-0.0218112	-0.147535	0.47714	-0.662855	-0.808716	-0.144442	0.59454	-0.144442	0.59454	0.95231	[-0.67,0.39]	chr3	573	-1	2577	1797	196	584	IQCB1	TAG	TAGT
1501	ENST00000310942.9	-0.060738	0.376009	0.435217	0.0256686	-1.17547	-0.738724	0.43903	0.0928322	0.43903	0.0928322	0.601904	[-0.07,0.96]	chr17	988	1	4628	1599	88	2941	CBX2	TGA	TGAA
1502	ENST00000310955.11	-0.0353417	-0.0124962	0.0222924	0.838752	0.98525	1.0081	0.0230193	0.839869	0.0230193	0.839869	0.988946	[-0.2,0.25]	chr1	544	1	1649	1500	75	74	CDC20	TGA	TGAA
1503	ENST00000310974.8	-0.0598885	0.397023	0.455673	0.0124511	-1.39227	-0.93536	0.458677	0.0680642	0.458677	0.0680642	0.531791	[-0.03,0.96]	chr7	174	-1	4870	2028	145	2697	DPY19L1	TGA	TGAC
1504	ENST00000310999.11	-0.012177	-0.0737239	-0.0629372	0.730946	-0.20864	-0.270187	-0.0605138	0.791177	-0.0605138	0.791177	0.987349	[-0.51,0.39]	chr11	657	-1	1605	579	94	932	MRPL11	TGA	TGAC
1505	ENST00000311008.16	0.0566632	0.118653	0.0598085	0.779481	0.37288	0.434869	0.0633654	0.784492	0.0633654	0.784492	0.987243	[-0.4,0.53]	chr16	335	1	2205	1587	374	244	SPNS1	TGA	TGAG
1506	ENST00000311051.7	0.0274667	0.0242052	-0.00486342	0.97886	-0.242728	-0.24599	-0.00174115	0.995839	-0.00174115	0.995839	0.999541	[-0.5,0.5]	chr11	133	-1	2619	2127	83	409	APBB1	TGA	TGAA
1507	ENST00000311085.8	-0.044558	0.031602	0.074929	0.696635	-0.951582	-0.875422	0.0775731	0.758613	0.0775731	0.758613	0.984754	[-0.42,0.58]	chr5	355	1	11072	9084	80	1908	DMXL1	TAA	TAAC
1508	ENST00000311129.9	0.0446149	-0.117809	-0.163682	0.300785	1.01982	0.857394	-0.1618	0.329077	-0.1618	0.329077	0.853516	[-0.49,0.16]	chr11	932	-1	2082	2004	21	57	PPP2R1B	TAA	TAAT
1509	ENST00000311151.9	-0.0116249	-0.362428	-0.352545	0.0621021	0.274168	-0.0766354	-0.350552	0.114193	-0.350552	0.114193	0.645324	[-0.78,0.08]	chr8	138	1	4603	1719	412	2472	DPYSL2	TAG	TAGA
1510	ENST00000311177.7	-0.153459	0.174383	0.326749	0.0764461	-0.916149	-0.588307	0.329621	0.172518	0.329621	0.172518	0.752267	[-0.14,0.81]	chr17	698	-1	2586	753	89	1744	HOXB9	TAA	TAAA
1511	ENST00000311180.9	-0.000335129	-0.0470986	-0.0477566	0.757892	-0.495154	-0.541918	-0.046251	0.81492	-0.046251	0.81492	0.988946	[-0.43,0.34]	chr3	390	1	8780	1830	106	6844	PDE12	TAG	TAGA
1512	ENST00000311181.5	0.0216765	-0.258119	-0.280848	0.0351441	1.53071	1.25092	-0.279656	0.0283402	-0.280848	0.0351441	0.391545	[-0.55,-0.02]	chr11	654	-1	2007	1248	84	675	B4GAT1	TGA	TGAG
1513	ENST00000311481.11	-0.140891	-0.332972	-0.193029	0.16584	0.144596	-0.0474848	-0.191836	0.235298	-0.191836	0.235298	0.801392	[-0.51,0.13]	chr11	647	1	1901	606	41	1254	RAB1B	TAG	TAGG
1514	ENST00000311506.9	0.113227	-0.182981	-0.297924	0.153193	-0.0303884	-0.326596	-0.29484	0.254868	-0.29484	0.254868	0.809647	[-0.8,0.21]	chr17	816	1	2537	1137	36	1364	METTL2A	TGA	TGAG
1515	ENST00000311669.12	0.0133833	0.0543612	0.0393113	0.842113	-0.524422	-0.483445	0.0426434	0.865562	0.0426434	0.865562	0.989347	[-0.46,0.55]	chr15	332	-1	2557	1491	94	972	ADPGK	TAG	TAGG
1516	ENST00000311672.10	0.0246357	-0.0908337	-0.115975	0.239248	-0.571297	-0.686767	-0.115147	0.345247	-0.115147	0.345247	0.861152	[-0.35,0.12]	chr1	594	1	537	276	69	192	UQCRH	TAA	TAAA
1517	ENST00000311772.10	-0.0129107	0.395255	0.406942	0.0152281	-1.19866	-0.790497	0.409998	0.0724492	0.409998	0.0724492	0.543974	[-0.04,0.86]	chr1	362	1	2340	1056	54	1230	PPP1R8	TGA	TGAT
1518	ENST00000311806.8	-0.0540609	-0.0346653	0.0180716	0.92035	-0.595327	-0.575931	0.0202318	0.929609	0.0202318	0.929609	0.99511	[-0.45,0.5]	chr3	153	1	4517	1584	340	2593	OXSR1	TAA	TAAA
1519	ENST00000311921.8	-0.103958	0.368732	0.471126	0.0391146	-1.09431	-0.621625	0.475754	0.119102	0.475754	0.119102	0.658657	[-0.12,1.08]	chr19	565	1	7638	2862	192	4584	ZNF507	TAG	TAGG
1520	ENST00000311936.7	-0.0638541	0.240514	0.30344	0.103279	-2.02591	-1.72154	0.306423	0.246749	0.306423	0.246749	0.80644	[-0.21,0.83]	chr12	219	-1	5765	567	192	5006	KRAS	TAA	TAAA
1521	ENST00000311956.9	-0.047153	0.295941	0.340024	0.198123	0.250821	0.593914	0.345508	0.25466	0.345508	0.25466	0.809647	[-0.25,0.95]	chr11	343	-1	3395	1320	118	1957	ARHGAP1	TGA	TGAA
1522	ENST00000312037.6	0.00120039	-0.0532314	-0.0546017	0.423531	-0.191838	-0.24627	-0.0542708	0.483436	-0.0542708	0.483436	0.922714	[-0.21,0.1]	chr5	581	-1	712	456	208	48	RPS14	TGA	TGAA
1523	ENST00000312046.10	0.0767336	0.118602	0.0404846	0.850143	-1.05621	-1.01434	0.043664	0.877761	0.043664	0.877761	0.989347	[-0.53,0.63]	chr8	445	1	4406	2520	133	1753	OXR1	TAA	TAAA
1524	ENST00000312049.10	-0.0655639	0.131606	0.195954	0.240978	0.394602	0.591772	0.197892	0.296018	0.197892	0.296018	0.846109	[-0.17,0.57]	chr11	588	-1	2761	1833	110	818	MEN1	TGA	TGAA
1525	ENST00000312239.10	-0.0304143	-0.134177	-0.104631	0.47586	-0.903011	-1.00677	-0.103301	0.587961	-0.103301	0.587961	0.949655	[-0.47,0.27]	chr1	253	-1	3884	1662	104	2118	HP1BP3	TAA	TAAA
1526	ENST00000312397.10	0.063891	-0.0698351	-0.135186	0.431221	0.521006	0.38728	-0.133059	0.50199	-0.133059	0.50199	0.923469	[-0.52,0.26]	chr11	638	1	3557	2403	47	1107	SART1	TGA	TGAC
1527	ENST00000312515.7	0.0454069	0.185394	0.137785	0.528189	-0.203035	-0.0630485	0.141932	0.594634	0.141932	0.594634	0.95231	[-0.38,0.67]	chr11	636	1	822	618	76	128	DRAP1	TAG	TAGC
1528	ENST00000312521.9	-0.0492197	-0.0301874	0.017415	0.929422	-1.81631	-1.79728	0.0210592	0.94	0.0210592	0.94	0.995968	[-0.55,0.6]	chr3	105	1	5231	1740	293	3198	NR1D2	TAA	TAAG
1529	ENST00000312579.3	0.417235	0.666189	0.244346	0.472736	1.71667	1.96563	0.252545	0.385108	0.244346	0.472736	0.922714	[-0.42,0.86]	chr11	633	1	1524	609	672	243	CCDC85B	TGA	TGAA
1530	ENST00000312938.4	0.149681	0.31621	0.164769	0.415585	-0.611003	-0.444474	0.16873	0.522263	0.16873	0.522263	0.927676	[-0.35,0.7]	chr3	487	-1	6020	3162	581	2277	ZBTB11	TGA	TGAG
1531	ENST00000313010.8	0.0489518	0.0551795	0.00504922	0.976343	0.533434	0.539662	0.00681127	0.966113	0.00504922	0.976343	0.999541	[-0.31,0.31]	chr11	811	-1	3489	1491	28	1970	PRCP	TGA	TGAG
1532	ENST00000313050.11	-0.00414418	0.0616065	0.0644694	0.668397	0.371801	0.437551	0.0664976	0.687401	0.0664976	0.687401	0.974163	[-0.26,0.39]	chr9	644	-1	8806	7074	74	1658	SEC16A	TAG	TAGG
1533	ENST00000313115.11	0.055281	-0.351402	-0.408654	0.0258369	1.09483	0.688152	-0.40635	0.0379553	-0.40635	0.0379553	0.408934	[-0.79,-0.02]	chr5	599	-1	471	207	80	184	ATOX1	TAG	TAGC
1534	ENST00000313117.11	0.128658	-0.200769	-0.32988	0.000368964	0.473995	0.144569	-0.329364	0.00170455	-0.329364	0.00170455	0.0678709	[-0.53,-0.12]	chr2	194	-1	2356	717	105	1534	SRSF7	TGA	TGAA
1535	ENST00000313143.9	-0.176216	0.594135	0.768341	0.00117789	-0.917026	-0.146675	0.77381	0.0120059	0.77381	0.0120059	0.220783	[0.17,1.39]	chr3	870	1	5269	2151	259	2859	DVL3	TGA	TGAG
1536	ENST00000313285.12	-0.0704985	-0.167474	-0.100132	0.681039	0.010115	-0.0868607	-0.0958776	0.745083	-0.0958776	0.745083	0.982424	[-0.67,0.48]	chr19	189	1	2035	1638	82	315	TRIP10	TGA	TGAA
1537	ENST00000313334.13	0.00602005	-0.150852	-0.158247	0.458087	-1.40295	-1.55982	-0.155413	0.589131	-0.155413	0.589131	0.949655	[-0.72,0.41]	chr1	630	1	4533	477	98	3958	BTF3L4	TAA	TAAA
1538	ENST00000313468.10	-0.0368587	-0.00891408	0.027151	0.83823	1.25416	1.2821	0.0282823	0.823576	0.027151	0.83823	0.988946	[-0.23,0.28]	chr11	698	1	737	633	53	51	NDUFS8	TGA	TGAC
1539	ENST00000313486.11	-0.0969143	0.302604	0.398166	0.0440421	-1.51837	-1.11885	0.401951	0.138339	0.401951	0.138339	0.694579	[-0.13,0.94]	chr17	18	-1	3912	813	256	2843	PITPNA	TAA	TAAA
1540	ENST00000313511.8	-0.0452985	-0.070236	-0.0253143	0.757362	0.542455	0.517518	-0.0247067	0.779869	-0.0247067	0.779869	0.98647	[-0.2,0.15]	chr16	329	-1	2011	1368	79	564	TUFM	TGA	TGAG
1541	ENST00000313582.6	-0.0931321	0.110971	0.199322	0.539302	1.44661	1.65072	0.206058	0.482716	0.199322	0.539302	0.933437	[-0.43,0.8]	chr19	706	1	1192	1071	64	57	NFKBIB	TGA	TGAT
1542	ENST00000313601.11	-0.0313236	0.231153	0.261141	0.157551	-0.459098	-0.196622	0.263864	0.259064	0.263864	0.259064	0.810325	[-0.2,0.73]	chr3	310	1	2219	1068	132	1019	GNAI2	TGA	TGAG
1543	ENST00000313608.13	0.0872679	0.332059	0.243916	0.105721	-0.0412127	0.203579	0.245798	0.174956	0.245798	0.174956	0.752267	[-0.11,0.6]	chr17	770	-1	5609	573	34	5002	MRPS23	TGA	TGAA
1544	ENST00000313655.5	0.136069	0.0732792	-0.0643039	0.740845	0.0239197	-0.0388701	-0.0617357	0.798087	-0.0617357	0.798087	0.987349	[-0.53,0.41]	chr8	475	-1	2198	1182	99	917	DSCC1	TAA	TAAA
1545	ENST00000313695.11	-0.0217422	-0.232194	-0.212652	0.302948	-0.00791201	-0.218364	-0.209852	0.399566	-0.209852	0.399566	0.895855	[-0.69,0.28]	chr1	1217	-1	4080	2877	112	1091	ARHGEF2	TAA	TAAG
1546	ENST00000313843.8	0.056167	0.177049	0.118434	0.619114	0.063654	0.184535	0.123204	0.660761	0.123204	0.660761	0.967271	[-0.43,0.68]	chr16	398	1	1410	894	248	268	STX4	TAA	TAAT
1547	ENST00000313899.12	-0.122105	-0.148976	-0.0271407	0.802064	2.70855	2.68168	-0.0268577	0.740687	-0.0271407	0.802064	0.988052	[-0.26,0.19]	chr4	342	-1	3068	1068	313	1687	HNRNPD	TAA	TAAA
1548	ENST00000314103.6	-0.0320908	-0.00178222	0.028769	0.866937	0.0791248	0.109433	0.0310262	0.876065	0.0310262	0.876065	0.989347	[-0.37,0.43]	chr21	115	1	4466	1680	137	2649	CHAF1B	TGA	TGAT
1549	ENST00000314138.11	0.0342751	-0.316187	-0.350653	7.22345e-07	-0.72889	-1.07935	-0.350345	3.20311e-05	-0.350345	3.20311e-05	0.00333342	[-0.52,-0.19]	chr11	172	1	4535	447	22	4066	RPL27A	TGA	TGAA
1550	ENST00000314167.9	-0.0366738	-0.0907891	-0.0561599	0.762226	0.58559	0.531474	-0.0534006	0.797855	-0.0534006	0.797855	0.987349	[-0.46,0.35]	chr4	13	-1	4461	3936	129	396	GAK	TGA	TGAG
1551	ENST00000314191.6	0.00879731	-0.149598	-0.158447	0.0217787	0.702537	0.544142	-0.158271	0.0335036	-0.158271	0.0335036	0.376936	[-0.3,-0.01]	chr8	239	-1	13509	12387	57	1065	PRKDC	TGA	TGAG
1552	ENST00000314328.14	0.00157923	0.135799	0.133507	0.390083	-1.39024	-1.25602	0.135412	0.519884	0.135412	0.519884	0.927676	[-0.28,0.55]	chr22	97	1	6763	3354	294	3115	SPECC1L	TGA	TGAG
1553	ENST00000314355.7	0.0578378	-0.162453	-0.220934	0.0799329	0.174474	-0.0458173	-0.219968	0.139225	-0.219968	0.139225	0.696732	[-0.51,0.07]	chr9	284	1	616	240	98	278	CKS2	TGA	TGAA
1554	ENST00000314358.10	-0.0226252	0.21413	0.235983	0.0687634	-0.481434	-0.244679	0.237504	0.143833	0.237504	0.143833	0.706042	[-0.08,0.56]	chr5	458	1	6724	5286	111	1327	KDM3B	TAG	TAGG
1555	ENST00000314400.10	0.12573	0.258043	0.13071	0.525662	-0.959891	-0.827578	0.134579	0.62684	0.134579	0.62684	0.956441	[-0.41,0.69]	chr3	528	-1	4820	1704	24	3092	NEPRO	TAG	TAGA
1556	ENST00000314423.12	-0.147975	-0.0248328	0.121645	0.500964	1.36788	1.49102	0.123591	0.465879	0.121645	0.500964	0.923469	[-0.23,0.47]	chr16	601	1	2188	2061	43	84	UTP4	TAA	TAAA
1557	ENST00000314425.9	0.0653529	0.0181759	-0.0484793	0.768293	0.690349	0.643172	-0.0465472	0.804036	-0.0465472	0.804036	0.988428	[-0.41,0.32]	chrX	339	-1	5536	4113	131	1292	ZMYM3	TGA	TGAG
1558	ENST00000314595.6	0.152959	-0.102358	-0.255779	0.0044481	0.413853	0.158536	-0.255133	0.012398	-0.255133	0.012398	0.223505	[-0.45,-0.06]	chr4	232	1	3785	3525	90	170	POLR2B	TAG	TAGC
1559	ENST00000314606.9	0.117932	0.0622584	-0.0563059	0.607953	0.798077	0.742403	-0.0555038	0.623256	-0.0555038	0.623256	0.956441	[-0.28,0.17]	chr19	356	-1	1811	1527	15	269	FARSA	TGA	TGAC
1560	ENST00000314607.10	0.0041878	-0.182522	-0.187583	0.23241	-1.14897	-1.33568	-0.186015	0.366827	-0.186015	0.366827	0.872683	[-0.59,0.22]	chr1	446	1	6994	4647	80	2267	ZMYM4	TAA	TAAA
1561	ENST00000314666.11	0.0181088	-0.0263462	-0.0449602	0.698583	0.862305	0.81785	-0.0440935	0.72492	-0.0440935	0.72492	0.979168	[-0.29,0.2]	chr17	185	1	5369	4017	130	1222	PFAS	TGA	TGAC
1562	ENST00000314673.8	0.013965	-0.297169	-0.313321	0.166787	0.101824	-0.20931	-0.310477	0.256211	-0.310477	0.256211	0.809647	[-0.84,0.23]	chr6	586	-1	3452	2841	140	471	SNX14	TAA	TAAA
1563	ENST00000314754.12	0.0520273	0.00213308	-0.051619	0.787843	0.426232	0.376337	-0.0488289	0.82932	-0.0488289	0.82932	0.988946	[-0.49,0.39]	chr1	1633	1	2220	1323	65	832	CD55	TAG	TAGA
1564	ENST00000314761.9	0.0402008	0.120574	0.0794816	0.560606	0.0729521	0.153325	0.0809763	0.612865	0.0809763	0.612865	0.954353	[-0.23,0.4]	chr2	830	1	2647	2493	19	135	WDR75	TAA	TAAG
1565	ENST00000314797.10	-0.0120714	0.158633	0.169941	0.187251	0.311119	0.481823	0.171249	0.249778	0.171249	0.249778	0.809464	[-0.12,0.46]	chr3	638	1	3078	2625	104	349	COPG1	TAA	TAAG
1566	ENST00000314845.7	0.0947001	0.0900759	-0.00672622	0.974838	-0.394996	-0.399621	-0.00264211	0.993847	-0.00264211	0.993847	0.999541	[-0.54,0.54]	chr11	340	-1	5023	3627	360	1036	AMBRA1	TAG	TAGA
1567	ENST00000314888.10	0.0937681	-0.0103743	-0.10456	0.378768	0.749955	0.645813	-0.103689	0.438416	-0.103689	0.438416	0.908786	[-0.37,0.16]	chr9	161	-1	8623	7626	154	843	TLN1	TAA	TAAA
1568	ENST00000314940.6	-0.119313	-0.0714257	0.0474938	0.64582	0.486663	0.53455	0.0482282	0.676077	0.0482282	0.676077	0.971065	[-0.18,0.28]	chr5	446	-1	8726	918	310	7498	HNRNPA0	TAA	TAAA
1569	ENST00000315013.9	-0.158517	-0.239922	-0.0841792	0.72814	-0.0396307	-0.121036	-0.0805205	0.786241	-0.0805205	0.786241	0.987263	[-0.66,0.5]	chr5	4	1	2682	2238	57	387	EXOC3	TAG	TAGC
1570	ENST00000315082.9	-0.0238629	-0.362529	-0.340744	0.0875595	0.517066	0.1784	-0.338332	0.12769	-0.338332	0.12769	0.67751	[-0.77,0.1]	chr16	25	1	2490	1857	68	565	RHOT2	TGA	TGAG
1571	ENST00000315091.7	0.00661189	0.12349	0.116294	0.331399	0.17154	0.288418	0.117206	0.3919	0.117206	0.3919	0.889947	[-0.15,0.39]	chr1	126	1	1835	888	12	935	TARDBP	TAA	TAAA
1572	ENST00000315144.14	-0.0194121	0.283359	0.301228	0.122926	-1.0956	-0.792833	0.30501	0.246355	0.30501	0.246355	0.80644	[-0.21,0.83]	chr1	1187	1	1730	1473	183	74	FLAD1	TGA	TGAC
1573	ENST00000315286.13	-0.047275	-0.14817	-0.102686	0.625578	-1.11082	-1.21172	-0.0994736	0.721263	-0.0994736	0.721263	0.978285	[-0.64,0.45]	chr17	639	-1	2114	675	23	1416	CCDC43	TAA	TAAC
1574	ENST00000315368.7	-0.00892505	0.0313466	0.038726	0.843922	0.0353439	0.0756154	0.0413502	0.85724	0.0413502	0.85724	0.988946	[-0.42,0.51]	chr4	128	1	2685	2427	142	116	ANAPC4	TAA	TAAT
1575	ENST00000315567.13	0.0952524	0.231357	0.134066	0.532732	0.390874	0.526979	0.137731	0.578758	0.137731	0.578758	0.94671	[-0.35,0.63]	chr4	328	1	1175	978	19	178	MRPL1	TAA	TAAA
1576	ENST00000315579.10	0.010764	-0.0918535	-0.102937	0.277739	0.221359	0.118741	-0.102367	0.349964	-0.102367	0.349964	0.861857	[-0.32,0.11]	chr12	51	1	4825	4206	76	543	NCAPD2	TAG	TAGG
1577	ENST00000315580.9	-0.0615728	0.604285	0.664743	0.000278833	-1.27671	-0.610849	0.66799	0.00797686	0.66799	0.00797686	0.177311	[0.17,1.17]	chr12	885	1	1644	1266	145	233	ARL6IP4	TGA	TGAG
1578	ENST00000315596.15	-0.0488494	0.150107	0.196479	0.366766	0.538299	0.737256	0.200463	0.397235	0.200463	0.397235	0.895855	[-0.26,0.67]	chr13	76	1	7472	4344	161	2967	PDS5B	TGA	TGAA
1579	ENST00000315717.10	-0.0775005	0.474174	0.550968	3.97644e-06	-0.74372	-0.192045	0.552499	0.000303647	0.552499	0.000303647	0.0190466	[0.25,0.86]	chr2	964	1	1410	903	74	433	ARPC2	TAA	TAAT
1580	ENST00000315758.10	-0.0244179	-0.117614	-0.0935332	0.263061	1.23609	1.14289	-0.0931546	0.25381	-0.0935332	0.263061	0.812243	[-0.26,0.07]	chr7	329	1	2170	1017	55	1098	MDH2	TGA	TGAG
1581	ENST00000315872.11	-0.0359954	0.344309	0.379361	0.0121297	-0.982857	-0.602553	0.381506	0.0566674	0.381506	0.0566674	0.487123	[-0.01,0.78]	chr2	43	-1	8345	4167	500	3678	ROCK2	TAA	TAAC
1582	ENST00000315939.11	-0.0826988	0.114532	0.196638	0.0925243	-0.424267	-0.227036	0.197609	0.169731	0.197609	0.169731	0.752267	[-0.08,0.48]	chr12	7	1	10796	7149	987	2660	WNK1	TAG	TAGA
1583	ENST00000315970.12	0.029133	0.224766	0.194736	0.133729	0.115415	0.311048	0.196341	0.19333	0.196341	0.19333	0.758005	[-0.1,0.49]	chr12	530	1	2682	2004	30	648	OS9	TGA	TGAG
1584	ENST00000316052.6	-0.0115999	-0.152772	-0.143198	0.460281	1.6643	1.52312	-0.140814	0.442943	-0.143198	0.460281	0.922714	[-0.54,0.24]	chr8	578	1	842	738	57	47	EXOSC4	TGA	TGAC
1585	ENST00000316059.7	-0.0140409	0.108037	0.12132	0.526814	-2.11867	-1.9966	0.123925	0.647736	0.123925	0.647736	0.964659	[-0.41,0.67]	chr11	439	1	5776	1713	219	3844	ZFP91	TAG	TAGT
1586	ENST00000316077.14	-0.0641369	0.0702172	0.133388	0.378008	-0.423664	-0.28931	0.135245	0.471965	0.135245	0.471965	0.922714	[-0.23,0.51]	chrX	632	-1	4385	2631	42	1712	MAP7D3	TAA	TAAG
1587	ENST00000316084.10	0.00764194	-0.139895	-0.14757	0.00976139	-0.868448	-1.01598	-0.147495	0.0221444	-0.147495	0.0221444	0.303765	[-0.27,-0.02]	chrX	351	-1	1474	792	53	629	RPS4X	TGA	TGAA
1588	ENST00000316149.8	0.00522039	0.059612	0.0525671	0.779633	0.167931	0.222322	0.0556039	0.795959	0.0556039	0.795959	0.987349	[-0.37,0.49]	chr6	621	-1	2407	528	90	1789	NDUFAF4	TGA	TGAA
1589	ENST00000316157.7	-0.0452406	-0.233242	-0.189317	0.246309	-0.234036	-0.422038	-0.187386	0.350684	-0.187386	0.350684	0.861857	[-0.58,0.21]	chr10	3	-1	5642	2217	41	3384	LARP4B	TGA	TGAA
1590	ENST00000316273.11	-0.00394154	-0.0286839	-0.0270213	0.891713	0.606403	0.58166	-0.0235137	0.919588	-0.0235137	0.919588	0.992877	[-0.47,0.43]	chr19	974	-1	1563	1179	22	362	BCAT2	TGA	TGAA
1591	ENST00000316448.9	0.0206775	0.191732	0.170924	0.0129837	0.805096	0.976151	0.171101	0.017964	0.171101	0.017964	0.27446	[0.03,0.31]	chr19	357	1	1903	1254	73	576	CALR	TAG	TAGA
1592	ENST00000316626.5	-0.10649	0.169527	0.273044	0.246132	0.0430924	0.319108	0.27775	0.311951	0.27775	0.311951	0.852891	[-0.26,0.83]	chr3	559	-1	1636	1302	232	102	GSK3B	TGA	TGAA
1593	ENST00000316694.8	-0.132846	0.091691	0.222462	0.263815	0.299793	0.52433	0.225683	0.320346	0.225683	0.320346	0.853516	[-0.22,0.68]	chr17	270	-1	2527	1452	198	877	SHMT1	TAA	TAAA
1594	ENST00000316715.9	-0.0606275	0.254682	0.312007	0.226935	0.192893	0.508203	0.317516	0.287321	0.317516	0.287321	0.837446	[-0.27,0.91]	chrX	53	-1	3118	987	189	1942	GPM6B	TAA	TAAA
1595	ENST00000316731.12	-0.14321	0.119607	0.261588	0.187585	-0.669246	-0.406429	0.264365	0.307626	0.264365	0.307626	0.852674	[-0.24,0.78]	chr7	61	-1	2885	1449	573	863	CCZ1B	TGA	TGAC
1596	ENST00000316836.4	-0.211442	0.0229568	0.233116	0.223515	-0.418915	-0.184516	0.235541	0.324064	0.235541	0.324064	0.853516	[-0.23,0.71]	chr14	346	-1	2590	1062	733	795	PNMA1	TGA	TGAG
1597	ENST00000316843.9	-0.0212508	-0.113229	-0.0940037	0.616571	0.521347	0.429369	-0.0911963	0.659003	-0.0911963	0.659003	0.966293	[-0.49,0.31]	chr17	265	1	4212	3195	48	969	LLGL1	TGA	TGAG
1598	ENST00000316851.11	-0.148868	-0.0961948	0.0505318	0.818198	0.494231	0.546905	0.0534415	0.820781	0.0534415	0.820781	0.988946	[-0.42,0.53]	chr11	947	1	5837	2577	211	3049	NCAM1	TGA	TGAT
1599	ENST00000316939.3	0.121701	0.17939	0.0566894	0.69585	1.49805	1.55574	0.0581019	0.659764	0.0566894	0.69585	0.975128	[-0.23,0.33]	chr19	359	-1	1769	669	11	1089	GADD45GIP1	TGA	TGAG
1600	ENST00000316963.8	-0.0324801	0.0977371	0.129537	0.480158	-2.47589	-2.34568	0.131813	0.614185	0.131813	0.614185	0.954353	[-0.38,0.65]	chr8	256	-1	2515	693	124	1698	LYPLA1	TGA	TGAC
1601	ENST00000316999.9	-0.0826227	-0.21352	-0.132654	0.501428	0.121382	-0.00951549	-0.130087	0.580002	-0.130087	0.580002	0.947495	[-0.59,0.33]	chr6	537	1	2403	1323	248	832	SMAP1	TGA	TGAA
1602	ENST00000317025.13	-0.0454534	0.250497	0.29508	0.128926	-1.82975	-1.5338	0.298194	0.275673	0.298194	0.275673	0.825577	[-0.24,0.84]	chr8	198	-1	10768	4314	517	5937	NSD3	TAA	TAAA
1603	ENST00000317089.10	0.0626407	-0.0201194	-0.0833201	0.478535	0.268025	0.185265	-0.0823179	0.548186	-0.0823179	0.548186	0.93732	[-0.35,0.19]	chr16	435	-1	3008	1239	102	1667	DNAJA2	TAA	TAAA
1604	ENST00000317096.8	0.0520186	-0.0865809	-0.140759	0.529216	-0.512563	-0.651163	-0.137324	0.633448	-0.137324	0.633448	0.959497	[-0.7,0.43]	chr3	864	-1	1414	1140	61	213	PARL	TAA	TAAA
1605	ENST00000317126.8	0.0880312	-0.297962	-0.38993	0.120618	1.55243	1.16644	-0.385386	0.119343	-0.38993	0.120618	0.66145	[-0.9,0.1]	chr10	288	-1	1501	1074	347	80	ASCC1	TGA	TGAG
1606	ENST00000317135.13	0.0123808	-0.0580762	-0.0725148	0.715193	-0.132088	-0.202545	-0.0691865	0.77808	-0.0691865	0.77808	0.98647	[-0.55,0.41]	chrX	512	-1	4953	2298	55	2600	LRCH2	TAA	TAAT
1607	ENST00000317147.10	-0.0307104	0.0283645	0.0587418	0.520937	-0.676825	-0.61775	0.0592696	0.600461	0.0592696	0.600461	0.953842	[-0.16,0.28]	chr16	523	-1	8411	7131	273	1007	CNOT1	TAG	TAGA
1608	ENST00000317276.9	0.0438433	-0.0779861	-0.124898	0.603791	1.1411	1.01927	-0.120743	0.631197	-0.120743	0.631197	0.958362	[-0.61,0.37]	chr17	179	-1	4676	3873	207	596	AC129492.1	TAG	TAGA
1609	ENST00000317361.11	0.109779	0.11	-0.00240033	0.988925	0.606815	0.607037	0.00198026	0.989733	0.00198026	0.989733	0.999541	[-0.55,0.56]	chr22	11	-1	2495	726	327	1442	BID	TGA	TGAA
1610	ENST00000317378.5	0.0291449	0.147254	0.115633	0.64351	1.94565	2.06376	0.119192	0.533464	0.115633	0.64351	0.962968	[-0.37,0.57]	chr19	212	1	790	567	187	36	TRAPPC5	TGA	TGAC
1611	ENST00000317560.13	-0.0130828	-0.000353081	0.0106103	0.960766	0.467085	0.479815	0.0135545	0.948586	0.0106103	0.960766	0.99896	[-0.39,0.4]	chr12	270	1	1359	912	98	349	PPHLN1	TAG	TAGG
1612	ENST00000317582.9	-0.0504994	-0.196599	-0.147541	0.462156	-0.957403	-1.1035	-0.145099	0.581891	-0.145099	0.581891	0.948521	[-0.66,0.37]	chr22	10	1	2992	1458	347	1187	BCL2L13	TAG	TAGG
1613	ENST00000317615.11	-0.15514	0.135802	0.288914	0.188021	0.06711	0.358052	0.292558	0.256529	0.292558	0.256529	0.809647	[-0.21,0.8]	chr18	48	1	1070	795	66	209	PSMG2	TGA	TGAT
1614	ENST00000317799.10	-0.0289143	-0.204352	-0.176572	0.191169	0.826004	0.650566	-0.174984	0.221118	-0.174984	0.221118	0.782297	[-0.46,0.11]	chr2	97	1	1997	1425	60	512	HADHB	TAA	TAAT
1615	ENST00000317881.9	-0.0503175	-0.0935662	-0.0433861	0.502659	0.582846	0.539598	-0.0432218	0.535586	-0.0432218	0.535586	0.933437	[-0.18,0.09]	chrX	527	1	1307	897	72	338	SLC25A5	TAA	TAAG
1616	ENST00000317897.4	-0.0582184	0.0303306	0.0872157	0.632773	-0.257706	-0.169157	0.0895674	0.68711	0.0895674	0.68711	0.974163	[-0.35,0.53]	chr3	886	-1	1636	924	181	531	MAGEF1	TGA	TGAG
1617	ENST00000317907.9	0.0248563	-0.0140683	-0.0408266	0.832445	0.391617	0.352692	-0.037724	0.869458	-0.037724	0.869458	0.989347	[-0.48,0.41]	chr2	172	1	2888	2532	243	113	TTC27	TGA	TGAT
1618	ENST00000318003.11	-0.0358648	-0.0879934	-0.0556495	0.825327	0.508613	0.456485	-0.0507108	0.86401	-0.0507108	0.86401	0.989181	[-0.62,0.52]	chr19	373	1	3581	2856	241	484	CC2D1A	TGA	TGAG
1619	ENST00000318066.7	0.0280658	-0.125334	-0.154272	0.22882	-0.399864	-0.553264	-0.152811	0.333041	-0.152811	0.333041	0.854469	[-0.46,0.16]	chr12	650	-1	4877	459	63	4355	UBE2N	TAA	TAAA
1620	ENST00000318130.13	0.0293958	0.295697	0.265142	0.167288	-1.56239	-1.29609	0.268378	0.31566	0.268378	0.31566	0.852891	[-0.26,0.8]	chr1	1491	-1	6837	2799	212	3826	EDEM3	TGA	TGAC
1621	ENST00000318158.11	-0.0590747	-0.176241	-0.118589	0.444789	0.43355	0.316384	-0.116743	0.503082	-0.116743	0.503082	0.923469	[-0.46,0.23]	chr9	184	1	1250	987	55	208	GRHPR	TAG	TAGC
1622	ENST00000318217.10	-0.127379	0.202954	0.328393	0.109736	-0.102966	0.227367	0.332132	0.175841	0.332132	0.175841	0.752267	[-0.15,0.82]	chr17	372	-1	5510	3021	252	2237	MYO1D	TGA	TGAC
1623	ENST00000318388.11	-0.0381191	0.0535976	0.0907937	0.53801	0.0424187	0.134135	0.0922429	0.593673	0.0922429	0.593673	0.95231	[-0.25,0.44]	chr18	30	1	857	750	45	62	NDUFV2	TAA	TAAT
1624	ENST00000318410.12	-0.0771659	-0.198661	-0.122449	0.416707	-0.183572	-0.305067	-0.121184	0.511554	-0.121184	0.511554	0.927676	[-0.48,0.24]	chr8	501	-1	4139	3480	302	357	WASHC5	TAA	TAAC
1625	ENST00000318443.10	-0.027804	-0.0124062	0.0139122	0.934089	-0.0582329	-0.0428352	0.0163386	0.93201	0.0139122	0.934089	0.995613	[-0.32,0.34]	chr15	337	1	3295	1605	132	1558	CD276	TGA	TGAC
1626	ENST00000318522.10	-0.0363586	-0.114369	-0.0787173	0.565554	-0.897475	-0.975485	-0.077568	0.662106	-0.077568	0.662106	0.967547	[-0.42,0.27]	chr2	205	1	5546	2946	259	2341	EML4	TAA	TAAC
1627	ENST00000318607.10	-0.0389609	-0.263827	-0.225293	0.0268965	-0.578107	-0.802973	-0.224599	0.0590615	-0.224599	0.0590615	0.494803	[-0.46,0.01]	chr8	425	-1	2861	1911	505	445	PABPC1	TAA	TAAA
1628	ENST00000318911.5	-0.0101304	-0.0347991	-0.0251084	0.793905	0.683845	0.659177	-0.0244916	0.814543	-0.0244916	0.814543	0.988946	[-0.23,0.18]	chr8	580	1	1191	978	24	189	CYC1	TGA	TGAC
1629	ENST00000319004.6	0.0215783	-0.0818162	-0.104242	0.421547	0.571458	0.468064	-0.103076	0.476938	-0.103076	0.476938	0.922714	[-0.39,0.18]	chr17	6	-1	3744	3177	122	445	GEMIN4	TGA	TGAC
1630	ENST00000319006.8	0.017768	-0.0362074	-0.0544119	0.613975	1.19978	1.14581	-0.0537474	0.623851	-0.0537474	0.623851	0.956441	[-0.27,0.16]	chr11	28	1	1199	1014	18	167	TALDO1	TAG	TAGC
1631	ENST00000319121.4	0.00050016	-0.131402	-0.132869	0.357433	-0.827481	-0.959384	-0.131408	0.480544	-0.131408	0.480544	0.922714	[-0.49,0.23]	chr17	557	-1	7402	2127	53	5222	KLHL11	TAG	TAGG
1632	ENST00000319211.5	0.0336432	-0.101547	-0.13784	0.525377	0.00178313	-0.133407	-0.133761	0.608719	-0.133761	0.608719	0.954236	[-0.64,0.38]	chr5	239	1	3727	1278	182	2267	F2R	TAG	TAGG
1633	ENST00000319223.8	0.0414695	0.534079	0.490778	0.0203733	0.246605	0.739214	0.494649	0.0437456	0.494649	0.0437456	0.443166	[0.01,0.98]	chr1	655	1	1727	1287	211	229	LRRC42	TGA	TGAT
1634	ENST00000319248.13	0.0561081	-0.188356	-0.2446	0.000226634	0.838283	0.593818	-0.244416	0.000481231	-0.244416	0.000481231	0.0272044	[-0.38,-0.11]	chr1	582	-1	945	600	67	278	PRDX1	TGA	TGAG
1635	ENST00000319285.4	-0.0293019	-0.184766	-0.15636	0.214682	0.536125	0.38066	-0.155264	0.272464	-0.155264	0.272464	0.822365	[-0.43,0.12]	chr16	376	-1	1222	513	95	614	DCTPP1	TAG	TAGA
1636	ENST00000319363.10	0.00157042	0.00413681	0	0.99939	0.345934	0.3485	0.00408195	0.984302	0	0.99939	0.999541	[-0.48,0.48]	chr22	3	1	8607	2601	133	5873	IL17RA	TGA	TGAG
1637	ENST00000319380.12	-0.0413311	0.00771184	0.0477329	0.761239	0.229605	0.278648	0.0498082	0.779715	0.0498082	0.779715	0.98647	[-0.3,0.4]	chr17	955	-1	5377	3879	11	1487	UBE2O	TAG	TAGC
1638	ENST00000319481.8	-0.139173	0.123573	0.261331	0.22777	-1.06913	-0.806382	0.264928	0.358441	0.264928	0.358441	0.868157	[-0.3,0.84]	chr18	78	-1	4152	2853	172	1127	OSBPL1A	TAA	TAAA
1639	ENST00000319550.9	-0.00101592	0.00850919	0.0079989	0.966628	0.374426	0.383951	0.010603	0.956338	0.0079989	0.966628	0.999541	[-0.34,0.36]	chr6	690	1	6919	1368	78	5473	NT5DC1	TAA	TAAG
1640	ENST00000319622.10	0.0231887	-0.0366598	-0.0599748	0.323503	0.773806	0.713957	-0.0598598	0.344316	-0.0598598	0.344316	0.861072	[-0.18,0.06]	chr15	324	-1	2717	1596	500	621	PKM	TGA	TGAT
1641	ENST00000319715.10	-0.0566581	-0.0327413	0.022389	0.894862	-0.282437	-0.258521	0.0246044	0.904246	0.0246044	0.904246	0.989633	[-0.39,0.44]	chr16	298	1	6858	5379	1061	418	RBBP6	TAA	TAAA
1642	ENST00000319725.10	-0.0224889	0.257361	0.279112	0.0433336	-0.182152	0.0976985	0.280722	0.0964379	0.280722	0.0964379	0.60993	[-0.05,0.61]	chr9	564	1	3153	1719	104	1330	FUBP3	TAG	TAGG
1643	ENST00000319942.8	0.103098	-0.295201	-0.399451	0.00529971	-0.260819	-0.659118	-0.398039	0.0241357	-0.398039	0.0241357	0.316669	[-0.74,-0.05]	chr1	743	1	1448	996	16	436	RABGGTB	TAG	TAGA
1644	ENST00000320027.9	0.0855809	0.107917	0.0217811	0.82647	0.421023	0.443359	0.02253	0.835243	0.02253	0.835243	0.988946	[-0.19,0.24]	chr13	68	-1	5191	2577	345	2269	HSPH1	TAG	TAGA
1645	ENST00000320270.4	-0.00988409	0.372393	0.380858	0.0489172	0.744458	1.12674	0.383674	0.0615099	0.383674	0.0615099	0.507229	[-0.02,0.79]	chr8	293	1	1720	1098	118	504	RRS1	TAA	TAAT
1646	ENST00000320307.8	-0.044035	-0.0759583	-0.0323759	0.763071	1.84168	1.80975	-0.0316965	0.746938	-0.0323759	0.763071	0.985125	[-0.25,0.18]	chr1	1295	-1	709	600	86	23	TAGLN2	TGA	TGAT
1647	ENST00000320316.8	0.0362255	-0.0403396	-0.0781869	0.684655	-0.394426	-0.470992	-0.0755059	0.757828	-0.0755059	0.757828	0.984754	[-0.55,0.4]	chr17	127	-1	1978	1212	178	588	PHF23	TGA	TGAT
1648	ENST00000320356.6	-0.0733735	0.0248088	0.0967188	0.571539	-0.365624	-0.267442	0.0989532	0.642006	0.0989532	0.642006	0.962273	[-0.32,0.52]	chr7	755	-1	2639	2256	122	261	EZH2	TGA	TGAC
1649	ENST00000320574.9	0.0227657	-0.145414	-0.1691	0.200629	-0.248054	-0.416234	-0.167721	0.301614	-0.167721	0.301614	0.849297	[-0.48,0.15]	chr12	932	-1	7840	6861	44	935	POLE	TAG	TAGC
1650	ENST00000320585.11	0.0674244	-0.0445679	-0.112619	0.379484	-0.5684	-0.680393	-0.111371	0.491771	-0.111371	0.491771	0.923469	[-0.43,0.21]	chr11	842	-1	3070	999	95	1976	CHORDC1	TGA	TGAG
1651	ENST00000320717.7	0.0815128	0.16293	0.0800038	0.648431	0.339001	0.420419	0.0824012	0.68356	0.0824012	0.68356	0.973568	[-0.32,0.49]	chr2	843	1	4834	2010	258	2566	GLS	TAA	TAAT
1652	ENST00000320743.7	-0.0143103	-0.122573	-0.110571	0.628513	-0.220116	-0.328379	-0.106746	0.708069	-0.106746	0.708069	0.977022	[-0.66,0.45]	chr12	541	-1	4070	3360	287	423	LRIG3	TAG	TAGA
1653	ENST00000320756.7	0.0491919	-0.0295967	-0.0804832	0.674171	0.219428	0.14064	-0.077606	0.734882	-0.077606	0.734882	0.981629	[-0.52,0.37]	chr12	135	-1	2606	447	77	2082	MAGOHB	TAA	TAAA
1654	ENST00000320785.10	0.0409845	0.262428	0.220945	0.233085	-2.94248	-2.72104	0.223489	0.41055	0.223489	0.41055	0.901238	[-0.31,0.77]	chr17	91	1	7917	3312	355	4250	KIF1C	TGA	TGAG
1655	ENST00000320805.8	0.0216349	0.0683212	0.0449806	0.835224	-1.19244	-1.14576	0.0485577	0.866067	0.0485577	0.866067	0.989347	[-0.53,0.64]	chr16	334	1	4569	1260	75	3234	NFATC2IP	TGA	TGAC
1656	ENST00000320848.7	0.0660966	0.166447	0.099348	0.535032	-0.676542	-0.576191	0.101538	0.623333	0.101538	0.623333	0.956441	[-0.31,0.51]	chr4	69	-1	1578	384	236	958	MRFAP1L1	TGA	TGAA
1657	ENST00000320876.10	-0.0253099	-0.141345	-0.117067	0.435196	-0.330544	-0.44658	-0.115672	0.533704	-0.115672	0.533704	0.933437	[-0.48,0.25]	chr18	11	1	8821	6018	338	2465	SMCHD1	TGA	TGAG
1658	ENST00000320895.10	-0.123964	0.47154	0.594771	0.000157611	-1.87942	-1.28392	0.5971	0.00714187	0.5971	0.00714187	0.167706	[0.16,1.04]	chr5	16	-1	2492	1617	258	617	CLPTM1L	TGA	TGAA
1659	ENST00000320954.10	-0.134416	-0.0649458	0.0683184	0.653774	-0.893548	-0.824078	0.0701777	0.720547	0.0701777	0.720547	0.978285	[-0.32,0.46]	chr3	132	1	6630	1206	99	5325	CRTAP	TAG	TAGC
1660	ENST00000320996.14	-0.111752	-0.0263508	0.0843551	0.569887	0.451895	0.537296	0.0858784	0.596446	0.0858784	0.596446	0.952394	[-0.23,0.41]	chr22	121	-1	2826	819	64	1943	PITPNB	TGA	TGAA
1661	ENST00000321027.7	0.135301	0.0252838	-0.111522	0.577272	-0.591052	-0.701069	-0.108769	0.676959	-0.108769	0.676959	0.971264	[-0.61,0.4]	chr2	390	-1	4440	2346	134	1960	GCFC2	TGA	TGAA
1662	ENST00000321030.9	0.0338678	0.033622	-0.00136023	0.98896	0.368076	0.36783	0.000380063	0.99744	0.000380063	0.99744	0.999541	[-0.33,0.33]	chr19	1136	1	1833	1500	52	281	PRPF31	TGA	TGAA
1663	ENST00000321169.9	0.0437136	-0.165847	-0.211642	0.291298	0.633689	0.424129	-0.208924	0.351817	-0.208924	0.351817	0.862115	[-0.65,0.23]	chr3	84	-1	2266	1737	368	161	HACL1	TAA	TAAA
1664	ENST00000321256.10	-0.0110505	0.191927	0.202183	0.178292	-1.21874	-1.01576	0.203932	0.311626	0.203932	0.311626	0.852891	[-0.19,0.6]	chr3	964	-1	2101	471	25	1605	NCBP2	TGA	TGAG
1665	ENST00000321265.10	-0.0229417	-0.129792	-0.107304	0.320934	0.652859	0.546008	-0.106661	0.362939	-0.106661	0.362939	0.870763	[-0.34,0.12]	chr1	343	1	1792	996	106	690	NUDC	TAG	TAGC
1666	ENST00000321341.11	-0.0831988	-0.0295581	0.0522972	0.746275	-0.252923	-0.199282	0.0543398	0.779501	0.0543398	0.779501	0.98647	[-0.33,0.44]	chr18	159	1	9031	1755	203	7073	ME2	TAG	TAGA
1667	ENST00000321358.12	-0.00545805	-0.207254	-0.201925	0.0118832	-1.75795	-1.95974	-0.201771	0.0493069	-0.201771	0.0493069	0.46456	[-0.4,0]	chr1	529	1	2979	975	148	1856	YBX1	TAA	TAAA
1668	ENST00000321394.12	-0.00633474	0.125499	0.131598	0.0475951	-0.156061	-0.0242271	0.131979	0.0804841	0.131979	0.0804841	0.57035	[-0.02,0.28]	chr6	878	-1	2352	1671	134	547	TCP1	TGA	TGAT
1669	ENST00000321442.10	0.0171787	0.150029	0.132519	0.150725	-0.832844	-0.699994	0.133103	0.254119	0.133103	0.254119	0.809647	[-0.1,0.36]	chr5	692	1	4066	969	89	3008	SFXN1	TAA	TAAA
1670	ENST00000321556.5	-0.0270141	0.170909	0.196811	0.263655	-0.36737	-0.169447	0.198937	0.363503	0.198937	0.363503	0.870787	[-0.23,0.63]	chr1	249	1	2657	1746	91	820	PINK1	TGA	TGAT
1671	ENST00000321562.8	-0.00920754	0.0818546	0.0904346	0.417112	0.314958	0.40602	0.0915053	0.44451	0.0915053	0.44451	0.914444	[-0.14,0.33]	chr17	554	1	2662	1749	104	809	FKBP10	TGA	TGAG
1672	ENST00000321612.7	-0.0187133	-0.102773	-0.0868951	0.728665	0.1101	0.0260401	-0.0823181	0.787611	-0.0823181	0.787611	0.987263	[-0.67,0.52]	chr9	37	-1	3900	3063	284	553	GLDC	TAG	TAGT
1673	ENST00000321757.11	0.0388162	-0.220542	-0.260206	0.0703369	0.0561217	-0.203236	-0.259013	0.13307	-0.259013	0.13307	0.686328	[-0.6,0.08]	chr5	652	1	2064	1005	68	991	MAT2B	TAG	TAGT
1674	ENST00000321765.10	0.0297135	0.0126627	-0.0176955	0.889325	-0.264612	-0.281663	-0.0166401	0.917762	-0.0166401	0.917762	0.991841	[-0.33,0.3]	chr17	321	-1	3786	3582	79	125	SPAG5	TAA	TAAG
1675	ENST00000321919.14	-0.0240808	-0.20167	-0.17854	0.217405	0.0438983	-0.133691	-0.17702	0.304802	-0.17702	0.304802	0.850015	[-0.51,0.16]	chr16	168	-1	3718	1662	23	2033	GLYR1	TAA	TAAG
1676	ENST00000321990.5	0.073551	0.10573	0.0304168	0.880052	-0.976856	-0.944677	0.0338275	0.899419	0.0338275	0.899419	0.989629	[-0.51,0.59]	chr17	355	1	6873	5535	382	956	ATAD5	TAA	TAAT
1677	ENST00000322028.5	-0.0827034	-0.0563298	0.0254241	0.857265	0.775417	0.80179	0.0267816	0.850147	0.0254241	0.857265	0.988946	[-0.25,0.29]	chr11	38	-1	876	204	21	651	POLR2L	TGA	TGAC
1678	ENST00000322030.12	-0.120337	0.173051	0.293126	0.000134074	-1.64901	-1.35563	0.293583	0.00219295	0.293583	0.00219295	0.0778411	[0.11,0.48]	chr9	534	1	2915	834	357	1724	SET	TAA	TAAA
1679	ENST00000322088.11	-0.0502871	-0.0601109	-0.0100501	0.904226	1.04571	1.03588	-0.00964812	0.912908	-0.00964812	0.912908	0.991192	[-0.18,0.17]	chr19	1097	1	5352	1770	45	3537	PPP2R1A	TGA	TGAT
1680	ENST00000322157.9	-0.00721137	0.00164686	0.00782381	0.957023	0.846227	0.855085	0.00930662	0.946912	0.00782381	0.957023	0.99787	[-0.26,0.28]	chr17	674	1	4309	2760	193	1356	NPEPPS	TGA	TGAA
1681	ENST00000322203.7	0.0421196	-0.0910754	-0.133338	0.0877417	-0.481727	-0.614922	-0.133125	0.159337	-0.133125	0.159337	0.730537	[-0.32,0.05]	chr6	333	1	718	654	34	30	RPL10A	TAA	TAAG
1682	ENST00000322213.8	0.0396496	0.0621171	0.0222269	0.799585	-0.212067	-0.189599	0.0227735	0.825767	0.0227735	0.825767	0.988946	[-0.18,0.23]	chrX	264	-1	9784	3702	128	5954	SMC1A	TAG	TAGC
1683	ENST00000322244.10	-0.0317459	-0.0914286	-0.0606362	0.650163	-0.128766	-0.188448	-0.0592928	0.71288	-0.0592928	0.71288	0.977542	[-0.37,0.26]	chr4	239	-1	9540	3159	36	6345	UBA6	TAA	TAAT
1684	ENST00000322313.9	0.135588	0.116426	-0.0201751	0.884729	-0.197937	-0.217099	-0.01849	0.915241	-0.01849	0.915241	0.991841	[-0.35,0.32]	chr2	616	-1	9490	4011	183	5296	WDR33	TAG	TAGA
1685	ENST00000322342.4	-0.0228787	0.198817	0.22027	0.303501	-1.46176	-1.24006	0.223895	0.447172	0.223895	0.447172	0.915547	[-0.36,0.81]	chr18	230	-1	7518	1134	81	6303	ZADH2	TAA	TAAA
1686	ENST00000322349.12	-0.0577961	-0.32837	-0.272292	0.146793	0.084804	-0.185771	-0.269857	0.22733	-0.269857	0.22733	0.794613	[-0.71,0.17]	chr12	648	-1	9875	4236	265	5374	EEA1	TAA	TAAT
1687	ENST00000322535.10	0.0193804	0.00144715	-0.0181632	0.827814	0.393132	0.375199	-0.0177596	0.851708	-0.0177596	0.851708	0.988946	[-0.2,0.17]	chr11	644	1	2903	2688	49	166	SF3B2	TAG	TAGG
1688	ENST00000322536.8	0.0610523	0.260766	0.198666	0.228174	-0.219927	-0.0202135	0.200648	0.326598	0.200648	0.326598	0.853516	[-0.2,0.61]	chr11	920	1	3217	2628	85	504	DDX10	TAA	TAAA
1689	ENST00000322602.9	0.0611789	-0.208944	-0.271966	0.168775	-0.31234	-0.582464	-0.269358	0.274817	-0.269358	0.274817	0.824807	[-0.75,0.21]	chr5	605	1	2891	1089	482	1320	MFAP3	TAA	TAAC
1690	ENST00000322652.10	-0.120743	0.00593987	0.125742	0.459255	-1.22055	-1.09387	0.127667	0.568463	0.127667	0.568463	0.945217	[-0.31,0.57]	chr17	364	1	4495	2220	240	2035	SUZ12	TGA	TGAA
1691	ENST00000322723.9	0.191054	-0.116365	-0.307507	8.51433e-06	0.641238	0.333819	-0.307316	1.23114e-05	-0.307316	1.23114e-05	0.00174301	[-0.45,-0.17]	chr2	1064	-1	3924	2133	131	1660	NCL	TAG	TAGC
1692	ENST00000322764.10	-0.031502	0.216019	0.246381	0.161082	1.4152	1.66272	0.248056	0.124774	0.246381	0.161082	0.732468	[-0.1,0.58]	chr7	730	1	2228	1719	80	429	ZYX	TGA	TGAG
1693	ENST00000322776.10	-0.0249408	-0.0710203	-0.046965	0.707931	0.285332	0.239253	-0.0456958	0.740985	-0.0456958	0.740985	0.982424	[-0.32,0.23]	chr11	691	1	1596	1395	153	48	NDUFV1	TAG	TAGC
1694	ENST00000322918.9	0.0549802	0.0740712	0.0181439	0.913578	-0.158407	-0.139316	0.0202422	0.921022	0.0202422	0.921022	0.993589	[-0.39,0.43]	chr1	1637	1	3124	1050	156	1918	CD46	TAG	TAGA
1695	ENST00000322954.11	-0.0380685	-0.0795896	-0.0429923	0.82756	-0.659085	-0.700606	-0.0403105	0.874592	-0.0403105	0.874592	0.989347	[-0.53,0.46]	chr15	314	-1	6904	4251	151	2502	UACA	TAG	TAGC
1696	ENST00000323013.7	0.0699179	0.066743	-0.00390452	0.973709	-0.398979	-0.402154	-0.0025628	0.986057	-0.0025628	0.986057	0.999541	[-0.29,0.29]	chr22	310	-1	5419	843	10	4566	RRP7A	TGA	TGAG
1697	ENST00000323116.10	-0.044175	-0.341255	-0.298246	0.171149	-2.04643	-2.34351	-0.296041	0.320548	-0.296041	0.320548	0.853516	[-0.88,0.29]	chr3	855	1	7315	3534	256	3525	ATP11B	TAA	TAAA
1698	ENST00000323274.15	0.00610754	-0.0868794	-0.0941806	0.535694	1.82632	1.73333	-0.0924896	0.505111	-0.0941806	0.535694	0.933437	[-0.4,0.21]	chr18	5	1	1613	942	90	581	TYMS	TAG	TAGG
1699	ENST00000323345.11	0.0580807	-0.268768	-0.327098	4.15404e-07	-1.27691	-1.60376	-0.326826	2.67625e-05	-0.326826	2.67625e-05	0.00291775	[-0.48,-0.17]	chr9	598	1	887	801	26	60	RPL7A	TAA	TAAA
1700	ENST00000323456.9	-0.0273163	0.439636	0.465831	0.0148345	-1.91475	-1.44779	0.4694	0.0858838	0.4694	0.0858838	0.583147	[-0.07,1.01]	chr17	784	-1	5839	3588	125	2126	MTMR4	TGA	TGAA
1701	ENST00000323468.10	-0.0280249	-0.0336138	-0.0067285	0.969796	-0.916294	-0.921883	-0.0043249	0.985997	-0.0043249	0.985997	0.999541	[-0.46,0.46]	chr11	918	-1	4253	1524	18	2711	KDELC2	TGA	TGAG
1702	ENST00000323563.7	0.160964	-0.201741	-0.365892	0.146022	0.882456	0.519751	-0.361438	0.196233	-0.361438	0.196233	0.758909	[-0.91,0.19]	chr13	102	-1	1462	1188	37	237	MRPS31	TAA	TAAG
1703	ENST00000323570.8	0.126621	0.0797746	-0.0484818	0.807135	-0.706198	-0.753044	-0.0453559	0.861543	-0.0453559	0.861543	0.989181	[-0.55,0.46]	chr4	533	1	4399	882	122	3395	ELMOD2	TAA	TAAA
1704	ENST00000323666.10	0.106204	-0.118435	-0.225029	0.0198206	-0.0605858	-0.285225	-0.224429	0.0513569	-0.224429	0.0513569	0.476065	[-0.45,0]	chr12	661	1	3400	1437	28	1935	METAP2	TAA	TAAA
1705	ENST00000323668.11	0.0728518	-0.176534	-0.249707	0.00789325	0.312945	0.0635587	-0.249127	0.0198931	-0.249127	0.0198931	0.291957	[-0.46,-0.04]	chr5	579	1	4832	4236	75	521	TCOF1	TGA	TGAC
1706	ENST00000323786.10	0.0119714	0.11556	0.102005	0.613238	0.0255257	0.129114	0.105129	0.66468	0.105129	0.66468	0.968262	[-0.37,0.59]	chr16	619	-1	2820	2370	11	439	COG4	TAG	TAGC
1707	ENST00000323798.8	-0.104547	0.0758435	0.179208	0.282564	0.420105	0.600495	0.181366	0.337861	0.181366	0.337861	0.855012	[-0.19,0.55]	chr19	983	-1	3569	2214	197	1158	GYS1	TAA	TAAG
1708	ENST00000323848.14	-0.0618046	0.00786481	0.0687675	0.62239	1.07943	1.1491	0.0699779	0.619975	0.0687675	0.62239	0.956441	[-0.2,0.34]	chr1	300	1	3735	2715	25	995	SRRM1	TAG	TAGG
1709	ENST00000323853.10	-0.0534677	0.0406258	0.093767	0.285462	1.07742	1.17152	0.0942436	0.2875	0.0942436	0.2875	0.837446	[-0.08,0.27]	chr2	459	-1	7194	6411	109	674	SNRNP200	TGA	TGAG
1710	ENST00000323927.3	-0.0557766	-0.538371	-0.486648	0.0537983	1.60498	1.12239	-0.482501	0.0461479	-0.486648	0.0537983	0.481138	[-1,0.01]	chr9	678	-1	2655	2469	28	158	ANAPC2	TGA	TGAC
1711	ENST00000323929.7	0.102057	-0.132312	-0.235631	0.138438	-0.223656	-0.458025	-0.233715	0.236015	-0.233715	0.236015	0.801392	[-0.62,0.15]	chr11	855	-1	6897	2127	223	4547	MRE11	TAA	TAAT
1712	ENST00000323959.9	0.0108772	0.26484	0.252855	0.101174	0.314229	0.568192	0.25502	0.149523	0.25502	0.149523	0.713938	[-0.09,0.6]	chr11	288	-1	2812	2154	155	503	CSTF3	TAG	TAGG
1713	ENST00000323963.10	0.0175292	-0.260045	-0.27842	0.0422436	-1.01654	-1.29411	-0.277303	0.119717	-0.277303	0.119717	0.658876	[-0.63,0.07]	chr3	904	1	1886	1224	34	628	EIF4A2	TAA	TAAT
1714	ENST00000324096.9	0.0198031	-0.125735	-0.148649	0.56291	2.07482	1.92928	-0.144604	0.524636	-0.148649	0.56291	0.945217	[-0.69,0.36]	chr19	465	1	3288	3180	23	85	MAP1S	TAG	TAGC
1715	ENST00000324266.10	0.0824593	0.0894274	0.00360454	0.996056	1.00829	1.01526	0.00869062	0.969809	0.00360454	0.996056	0.999541	[-0.5,0.49]	chr2	10	1	2499	2208	187	104	TRAPPC12	TAG	TAGC
1716	ENST00000324366.13	0.0641579	-0.100381	-0.164916	0.121813	0.519277	0.354738	-0.16423	0.171942	-0.16423	0.171942	0.752267	[-0.4,0.07]	chr14	67	-1	2304	1914	15	375	PRMT5	TAG	TAGC
1717	ENST00000324439.9	-0.0124831	0.291475	0.302313	0.18092	-0.65165	-0.347692	0.306211	0.29731	0.306211	0.29731	0.848293	[-0.27,0.89]	chr4	305	-1	4686	786	399	3501	RCHY1	TGA	TGAC
1718	ENST00000324460.7	0.177623	0.00769374	-0.170139	0.0442018	2.11641	1.94648	-0.169753	0.0202904	-0.170139	0.0442018	0.445816	[-0.34,0]	chr9	485	-1	3921	1965	217	1739	HSPA5	TAG	TAGA
1719	ENST00000324501.10	-0.105213	-0.125368	-0.0217727	0.927706	-0.669828	-0.689983	-0.0192004	0.9491	-0.0192004	0.9491	0.995968	[-0.59,0.56]	chr14	336	1	6018	1404	212	4402	PSEN1	TAG	TAGC
1720	ENST00000324545.8	0.0416432	0.160077	0.118187	0.135802	-0.67286	-0.554427	0.118644	0.222849	0.118644	0.222849	0.786154	[-0.07,0.31]	chrX	150	1	12401	7713	633	4055	USP9X	TGA	TGAA
1721	ENST00000324559.8	0.0682796	-0.119891	-0.189871	0.37458	-0.576607	-0.764778	-0.186553	0.498013	-0.186553	0.498013	0.923469	[-0.72,0.35]	chr11	254	1	6651	2742	317	3592	ANO5	TAA	TAAT
1722	ENST00000324685.10	0.00231454	0.0710776	0.0683916	0.488822	-0.579926	-0.511163	0.0691279	0.569508	0.0691279	0.569508	0.945718	[-0.17,0.31]	chr16	389	1	5634	3006	435	2193	RNF40	TGA	TGAA
1723	ENST00000324817.6	-0.0936938	0.0318905	0.124723	0.389504	0.49569	0.621274	0.126229	0.430981	0.126229	0.430981	0.908599	[-0.19,0.44]	chrX	149	-1	7996	4365	130	3501	MED14	TAG	TAGA
1724	ENST00000324856.13	-0.0661188	-0.184617	-0.119993	0.446916	0.921148	0.802649	-0.117888	0.482301	-0.117888	0.482301	0.922714	[-0.45,0.21]	chr1	337	1	8595	6858	389	1348	ARID1A	TGA	TGAC
1725	ENST00000324862.7	0.044437	0.045889	0	0.998344	-0.521057	-0.519605	0.002701	0.987377	0	0.998344	0.999541	[-0.36,0.36]	chr1	1056	1	2414	2052	108	254	PRPF3	TGA	TGAG
1726	ENST00000324868.12	0.0795059	-0.0757811	-0.156806	0.397819	0.951839	0.796552	-0.15444	0.448391	-0.15444	0.448391	0.916324	[-0.55,0.25]	chr12	255	-1	2122	1434	28	660	YARS2	TGA	TGAT
1727	ENST00000324932.12	0.0556391	0.11059	0.0544319	0.61715	-0.0161655	0.0387854	0.0553916	0.670345	0.0553916	0.670345	0.970985	[-0.2,0.31]	chr11	81	-1	6726	5403	183	1140	NUP98	TGA	TGAG
1728	ENST00000325083.12	0.0736456	-0.0678647	-0.142303	0.343148	-0.603882	-0.745393	-0.140679	0.463243	-0.140679	0.463243	0.922714	[-0.52,0.24]	chr8	80	1	6820	6075	439	306	PCM1	TGA	TGAG
1729	ENST00000325089.7	-0.025642	0.597258	0.621955	0.00166207	-2.04052	-1.41762	0.625813	0.0298576	0.625813	0.0298576	0.352278	[0.06,1.2]	chr13	213	1	21103	2877	219	18007	SLITRK5	TAA	TAAA
1730	ENST00000325215.10	-0.196258	-0.108161	0.0870571	0.615994	1.90407	1.99216	0.0884587	0.543716	0.0870571	0.615994	0.954552	[-0.25,0.41]	chr16	328	1	3788	3189	167	432	ATXN2L	TGA	TGAG
1731	ENST00000325327.4	-0.0222392	0.136673	0.158318	0.16931	-0.558216	-0.399304	0.159541	0.260324	0.159541	0.260324	0.810325	[-0.12,0.44]	chr19	81	-1	4634	1863	26	2745	LMNB2	TGA	TGAA
1732	ENST00000325366.14	-0.0612353	0.191904	0.251672	0.189833	-0.693371	-0.440231	0.254637	0.303763	0.254637	0.303763	0.849297	[-0.23,0.75]	chr5	65	1	3572	1329	92	2151	C5orf22	TGA	TGAA
1733	ENST00000325464.6	-0.0487246	-0.25371	-0.207179	0.321903	1.67205	1.46707	-0.204412	0.291783	-0.207179	0.321903	0.853516	[-0.64,0.2]	chr19	24	-1	2892	2634	120	138	MED16	TGA	TGAC
1734	ENST00000325495.9	0.0454037	-0.0744386	-0.120002	0.135612	1.65834	1.5385	-0.119713	0.117124	-0.120002	0.135612	0.688463	[-0.28,0.04]	chr19	236	1	2477	2193	24	260	HNRNPM	TAA	TAAG
1735	ENST00000325542.10	0.0640823	-0.352787	-0.418499	0.0364189	-0.932153	-1.34902	-0.416409	0.110548	-0.416409	0.110548	0.638474	[-0.93,0.1]	chr11	868	1	3141	1503	201	1437	CEP57	TGA	TGAC
1736	ENST00000325551.9	-0.00561263	0.269095	0.273969	0.0683407	-0.68254	-0.407833	0.275835	0.155617	0.275835	0.155617	0.723014	[-0.11,0.66]	chr9	386	-1	2454	2205	57	192	CTNNAL1	TGA	TGAG
1737	ENST00000325599.13	-0.0142975	-0.0660701	-0.0539779	0.794747	-0.18203	-0.233803	-0.0503303	0.844643	-0.0503303	0.844643	0.988946	[-0.55,0.45]	chr3	432	-1	2846	1734	105	1007	SHQ1	TGA	TGAC
1738	ENST00000325844.9	0.0287026	-0.280185	-0.311255	0.116894	0.459259	0.150372	-0.308097	0.175371	-0.308097	0.175371	0.752267	[-0.75,0.14]	chr15	454	1	3392	585	10	2797	MRPS11	TGA	TGAT
1739	ENST00000325954.9	-0.0440852	0.240237	0.283225	0.107794	-1.92957	-1.64525	0.286007	0.25014	0.286007	0.25014	0.809464	[-0.2,0.78]	chr12	842	1	3814	2436	456	922	RNF10	TGA	TGAC
1740	ENST00000325974.8	-0.0601899	0.437059	0.496141	0.00515591	-1.10695	-0.6097	0.498957	0.0373753	0.498957	0.0373753	0.40748	[0.03,0.98]	chr7	45	1	1802	1449	66	287	CCZ1	TGA	TGAC
1741	ENST00000326005.10	-0.0534739	-0.144828	-0.0937506	0.686921	-0.313803	-0.405158	-0.0895966	0.759105	-0.0895966	0.759105	0.984754	[-0.66,0.48]	chr15	265	-1	1934	570	233	1131	OAZ2	TAA	TAAT
1742	ENST00000326019.10	0.145746	0.179812	0.0324417	0.862475	0.140637	0.174704	0.035242	0.870378	0.035242	0.870378	0.989347	[-0.4,0.48]	chr2	142	1	2959	2391	282	286	SLC4A1AP	TGA	TGAT
1743	ENST00000326043.5	-0.175806	-0.174784	-0.00340085	0.980652	1.15892	1.15994	0.00248066	0.990434	0.00248066	0.990434	0.999541	[-0.53,0.54]	chr16	674	-1	2669	1212	835	622	MAF	TGA	TGAA
1744	ENST00000326047.9	-0.0327614	0.134739	0.165922	0.46168	-0.713512	-0.546012	0.169887	0.566794	0.169887	0.566794	0.945217	[-0.41,0.76]	chr3	209	1	4760	4167	72	521	KIF15	TGA	TGAG
1745	ENST00000326195.13	0.085017	-0.0446923	-0.130385	0.283682	0.0638234	-0.065886	-0.12927	0.371136	-0.12927	0.371136	0.877793	[-0.41,0.15]	chr6	192	1	3405	2538	46	821	ABCF1	TGA	TGAG
1746	ENST00000326225.3	0.136584	-0.14834	-0.28631	0.119723	-1.04022	-1.32515	-0.283829	0.241975	-0.283829	0.241975	0.804957	[-0.76,0.19]	chr1	1832	-1	8633	6828	97	1708	AHCTF1	TAA	TAAT
1747	ENST00000326266.13	-0.130453	0.263748	0.391513	0.111826	-0.210965	0.183236	0.397108	0.184467	0.397108	0.184467	0.752562	[-0.19,0.99]	chr16	124	1	1411	1026	292	93	THOC6	TGA	TGAT
1748	ENST00000326291.11	0.0273005	0.268656	0.239444	0.243959	-0.515386	-0.274031	0.243437	0.355176	0.243437	0.355176	0.866739	[-0.27,0.77]	chr13	192	1	3080	2274	264	542	PIBF1	TAG	TAGT
1749	ENST00000326427.11	-0.0358938	0.256639	0.291418	0.0741429	-0.316543	-0.0240096	0.293782	0.144909	0.293782	0.144909	0.706145	[-0.1,0.69]	chr2	1056	1	2037	804	84	1149	ITM2C	TGA	TGAG
1750	ENST00000326446.9	-0.0242845	-0.219768	-0.198895	0.428154	0.308624	0.113141	-0.19437	0.508427	-0.19437	0.508427	0.926048	[-0.77,0.38]	chr2	688	1	2805	681	711	1413	ARL6IP6	TAA	TAAA
1751	ENST00000326624.2	0.0473432	0.151035	0.103019	0.426555	-0.759655	-0.655963	0.104239	0.532889	0.104239	0.532889	0.933437	[-0.22,0.44]	chrX	542	1	5211	2019	228	2964	ZBTB33	TAA	TAAA
1752	ENST00000326739.9	-0.0169093	-0.0599381	-0.0433155	0.581023	0.421121	0.378093	-0.0429079	0.621764	-0.0429079	0.621764	0.956441	[-0.21,0.13]	chr3	278	-1	1651	1545	48	58	IMPDH2	TGA	TGAA
1753	ENST00000326764.9	-0.0615746	-0.21332	-0.154053	0.469821	1.08275	0.931006	-0.151043	0.488981	-0.151043	0.488981	0.922714	[-0.58,0.28]	chr19	1151	1	3991	2403	479	1109	LENG8	TGA	TGAG
1754	ENST00000326793.11	-0.0591438	0.00154451	0.059216	0.74375	-0.862128	-0.80144	0.0617119	0.79253	0.0617119	0.79253	0.987349	[-0.4,0.53]	chr3	942	-1	7093	2337	173	4583	ACAP2	TGA	TGAA
1755	ENST00000326925.10	0.0120846	-0.0601723	-0.0729626	0.566732	1.43739	1.36513	-0.0721009	0.56756	-0.0721009	0.56756	0.945217	[-0.32,0.18]	chr3	277	1	2012	555	1134	323	NDUFAF3	TGA	TGAA
1756	ENST00000327044.7	0.0875441	-0.0263421	-0.114393	0.267743	0.290451	0.176564	-0.113639	0.322065	-0.113639	0.322065	0.853516	[-0.34,0.11]	chr1	4	-1	2757	2250	16	491	NOC2L	TGA	TGAG
1757	ENST00000327064.8	-0.122735	0.369511	0.491581	0.000257912	-0.0143108	0.477935	0.493197	0.00179809	0.493197	0.00179809	0.0697751	[0.18,0.81]	chr19	294	1	3330	1827	190	1313	CARM1	TAG	TAGG
1758	ENST00000327134.7	-0.0872462	0.10774	0.193943	0.200771	-0.148189	0.0467975	0.195925	0.282394	0.195925	0.282394	0.833928	[-0.16,0.56]	chr3	962	1	6139	1575	322	4242	PAK2	TAA	TAAC
1759	ENST00000327141.8	-0.0196855	0.759624	0.777388	0.000404842	-1.38648	-0.607172	0.783544	0.0111086	0.783544	0.0111086	0.213843	[0.18,1.41]	chr19	95	-1	1608	594	357	657	AES	TAG	TAGC
1760	ENST00000327158.5	-0.0658277	0.188215	0.252219	0.222211	-0.3704	-0.116358	0.255816	0.320872	0.255816	0.320872	0.853516	[-0.25,0.77]	chr17	10	1	3182	585	14	2583	TIMM22	TGA	TGAG
1761	ENST00000327300.12	0.0709613	-0.112374	-0.183773	0.0593537	1.4825	1.29917	-0.1832	0.0447701	-0.183773	0.0593537	0.494803	[-0.38,0.01]	chr1	402	1	2713	1332	128	1253	KHDRBS1	TAA	TAAA
1762	ENST00000327304.10	0.0777406	0.0558123	-0.0235742	0.896258	0.150702	0.128774	-0.0207364	0.925207	-0.0207364	0.925207	0.994489	[-0.45,0.41]	chr9	191	-1	1813	828	20	965	EXOSC3	TGA	TGAT
1763	ENST00000327331.2	0.0879078	-0.393922	-0.483638	0.00507068	0.263918	-0.217912	-0.48134	0.0177224	-0.48134	0.0177224	0.273536	[-0.88,-0.08]	chr1	477	1	2303	843	113	1347	CDCA8	TGA	TGAG
1764	ENST00000327347.10	-0.0482022	-0.186002	-0.138797	0.455607	-1.53452	-1.67232	-0.136573	0.586862	-0.136573	0.586862	0.949655	[-0.63,0.36]	chr10	55	-1	3265	1179	372	1714	SEPHS1	TAA	TAAT
1765	ENST00000327423.11	0.0087437	0.000655617	-0.00875948	0.950194	-0.969529	-0.977617	-0.00721528	0.969035	-0.00721528	0.969035	0.999541	[-0.37,0.36]	chr22	177	-1	10827	6456	191	4180	PRR14L	TGA	TGAG
1766	ENST00000327435.11	-0.00906433	0.00634516	0.0146877	0.913909	-0.198122	-0.182712	0.0159094	0.921424	0.0159094	0.921424	0.993589	[-0.31,0.34]	chr2	11	-1	2181	540	44	1597	ADI1	TAG	TAGC
1767	ENST00000327443.9	-0.0677231	-0.16231	-0.0953299	0.507409	-0.677174	-0.77176	-0.0941849	0.605598	-0.0941849	0.605598	0.953842	[-0.45,0.26]	chr12	416	1	7680	2358	116	5206	SP1	TGA	TGAG
1768	ENST00000327680.6	0.00995523	-0.065244	-0.0769728	0.717353	-0.462293	-0.537492	-0.0740548	0.786577	-0.0740548	0.786577	0.987263	[-0.6,0.46]	chr12	698	1	3014	1740	45	1229	PARPBP	TAA	TAAA
1769	ENST00000327697.11	-0.114014	-0.00662601	0.105058	0.651392	-0.221551	-0.114162	0.108671	0.696971	0.108671	0.696971	0.975375	[-0.44,0.67]	chr3	295	1	4255	3945	86	224	RNF123	TAG	TAGC
1770	ENST00000327827.12	-0.0534642	0.400588	0.452935	0.0212619	-1.41076	-0.956713	0.456514	0.0927448	0.456514	0.0927448	0.601904	[-0.08,1]	chr16	185	1	5952	828	401	4723	C16orf72	TAA	TAAA
1771	ENST00000327858.11	-0.0689206	0.00477753	0.0715463	0.749768	1.45043	1.52413	0.0743192	0.708915	0.0715463	0.749768	0.98344	[-0.36,0.49]	chr22	339	1	2904	2112	103	689	FBLN1	TGA	TGAG
1772	ENST00000327892.13	0.00153414	-0.204999	-0.20664	0.000200525	0.492526	0.285993	-0.2065	0.000358606	-0.2065	0.000358606	0.02219	[-0.32,-0.09]	chr6	201	1	2515	1335	155	1025	TUBB	TAA	TAAG
1773	ENST00000328024.11	-0.28824	-0.143703	0.14084	0.672835	2.58273	2.72726	0.14509	0.51155	0.14084	0.672835	0.970985	[-0.5,0.72]	chr19	234	1	1590	657	57	876	RAB11B	TGA	TGAC
1774	ENST00000328046.8	-0.0831753	0.235631	0.31791	0.0779701	-1.63559	-1.31679	0.320239	0.200386	0.320239	0.200386	0.765276	[-0.17,0.82]	chrX	106	-1	6272	1815	256	4201	KLHL15	TAA	TAAT
1775	ENST00000328078.2	-0.239011	-0.252786	-0.0182584	0.923171	3.61216	3.59839	-0.0129944	0.957005	-0.0129944	0.957005	0.99787	[-0.48,0.45]	chrX	562	1	2493	1677	97	719	GLUD2	TAG	TAGA
1776	ENST00000328090.9	0.00657108	-0.103887	-0.110911	0.360282	-1.11474	-1.2252	-0.109888	0.484507	-0.109888	0.484507	0.922714	[-0.42,0.2]	chr10	24	1	8626	7293	625	708	TASOR2	TGA	TGAC
1777	ENST00000328111.6	0.0384559	-0.419293	-0.459991	0.0448459	-0.027365	-0.485114	-0.457254	0.104004	-0.457254	0.104004	0.630121	[-1.01,0.09]	chr20	179	1	4336	2562	321	1453	DNMT3B	TAG	TAGT
1778	ENST00000328142.3	0.0131849	-0.238	-0.252585	0.152011	-0.28992	-0.541105	-0.250346	0.253844	-0.250346	0.253844	0.809647	[-0.68,0.18]	chr10	372	-1	2939	1086	283	1570	ATAD1	TAA	TAAG
1779	ENST00000328205.9	-0.0294287	0.2245	0.252542	0.227985	-0.40765	-0.153721	0.255811	0.337197	0.255811	0.337197	0.854469	[-0.27,0.79]	chr1	1727	-1	3567	1677	546	1344	LIN9	TGA	TGAG
1780	ENST00000328257.13	-0.0174301	-0.511346	-0.496197	0.0157995	0.547164	0.053248	-0.493403	0.0355035	-0.493403	0.0355035	0.393783	[-0.95,-0.03]	chr11	763	1	2487	1161	133	1193	PPME1	TAG	TAGT
1781	ENST00000328268.8	0.118452	0.544125	0.423045	0.0813463	-0.1211	0.304572	0.428606	0.151781	0.428606	0.151781	0.7165	[-0.16,1.03]	chr22	355	1	1357	1062	74	221	CRELD2	TAA	TAAT
1782	ENST00000328379.5	-0.0651906	-0.0814378	-0.0191955	0.92998	0.555899	0.539652	-0.0149205	0.957118	-0.0149205	0.957118	0.99787	[-0.54,0.51]	chr2	84	-1	1105	423	5	677	PTRHD1	TAA	TAAC
1783	ENST00000328434.8	-0.0475473	-0.0463545	0	0.998452	0.422046	0.423239	0.00176065	0.989584	0	0.998452	0.999541	[-0.33,0.32]	chr17	592	-1	780	321	23	436	COA3	TAA	TAAT
1784	ENST00000328631.10	-0.02019	0.349857	0.367195	0.123221	-0.190724	0.179323	0.37288	0.202153	0.37288	0.202153	0.7668	[-0.2,0.96]	chr3	270	-1	1746	1281	195	270	IP6K2	TGA	TGAG
1785	ENST00000328649.10	-0.0230246	-0.103219	-0.0823793	0.705847	0.952315	0.872121	-0.0789227	0.742171	-0.0789227	0.742171	0.982424	[-0.55,0.39]	chr15	476	-1	1247	576	162	509	CIB1	TGA	TGAC
1786	ENST00000328703.11	-0.0537871	0.0738981	0.127127	0.370346	-0.873715	-0.74603	0.128384	0.493909	0.128384	0.493909	0.923469	[-0.24,0.5]	chr1	1172	1	1227	840	213	174	HAX1	TAG	TAGC
1787	ENST00000328771.9	-0.005383	-0.183876	-0.180203	0.398625	-0.189946	-0.368439	-0.177579	0.500823	-0.177579	0.500823	0.923469	[-0.69,0.34]	chr19	932	1	4338	3432	315	591	DHX34	TGA	TGAG
1788	ENST00000328827.9	-0.0112532	-0.00940922	0.000920461	0.991704	-1.43002	-1.42817	0.00312142	0.986717	0.000920461	0.991704	0.999541	[-0.32,0.33]	chr12	615	-1	8991	1023	240	7728	PAWR	TAG	TAGA
1789	ENST00000328834.9	0.0171528	-0.199455	-0.21802	0.189392	0.113911	-0.102697	-0.215994	0.275292	-0.215994	0.275292	0.824975	[-0.6,0.17]	chr3	129	1	2815	2235	316	264	CNOT10	TGA	TGAT
1790	ENST00000328848.5	-0.0621582	-0.0085314	0.0524146	0.739572	-0.00786055	0.0457662	0.0544519	0.768181	0.0544519	0.768181	0.985535	[-0.31,0.42]	chr15	48	-1	554	195	104	255	NOP10	TGA	TGAG
1791	ENST00000328914.5	0.0174653	-0.299362	-0.318016	0.0622214	-0.692864	-1.00969	-0.316184	0.139137	-0.316184	0.139137	0.696732	[-0.73,0.1]	chr7	34	1	11194	2202	14	8978	FOXK1	TGA	TGAG
1792	ENST00000328923.8	-0.03954	-0.258696	-0.219769	0.0364449	0.81841	0.599254	-0.218983	0.0513271	-0.218983	0.0513271	0.476065	[-0.44,0]	chr12	512	1	2157	1515	68	574	SHMT2	TGA	TGAA
1793	ENST00000328933.10	-0.038434	0.383605	0.419176	0.0914694	0.0821863	0.504226	0.424698	0.140968	0.424698	0.140968	0.699607	[-0.14,1]	chr22	264	1	4383	702	20	3661	SYNGR1	TGA	TGAG
1794	ENST00000329138.9	-0.0467142	-0.0899477	-0.0449828	0.801067	0.418575	0.375341	-0.0422577	0.837009	-0.0422577	0.837009	0.988946	[-0.44,0.36]	chr17	1020	1	2893	2334	56	503	HGS	TGA	TGAC
1795	ENST00000329251.5	0.0175379	-0.147979	-0.165622	0.0107277	-1.66129	-1.8268	-0.165445	0.0370804	-0.165445	0.0370804	0.40523	[-0.32,-0.01]	chr11	519	-1	1446	1314	49	83	EEF1G	TGA	TGAA
1796	ENST00000329271.8	0.0131418	-0.248268	-0.262571	0.153079	-1.40907	-1.67048	-0.260451	0.290056	-0.260451	0.290056	0.83849	[-0.74,0.22]	chr5	563	1	4020	678	41	3301	GRPEL2	TGA	TGAA
1797	ENST00000329276.10	0.026226	0.000364784	-0.0262831	0.801487	-0.737039	-0.7629	-0.0254353	0.846692	-0.0254353	0.846692	0.988946	[-0.28,0.23]	chr20	33	1	1913	1785	29	99	NOP56	TAG	TAGA
1798	ENST00000329399.7	-0.0863879	0.112359	0.197487	0.197434	0.561707	0.760454	0.199557	0.236628	0.199557	0.236628	0.801392	[-0.13,0.53]	chr10	425	-1	1431	990	88	353	PDLIM1	TGA	TGAG
1799	ENST00000329421.8	-0.0932984	-0.0860793	0.00684306	0.94598	0.741947	0.749166	0.00746313	0.939408	0.00684306	0.94598	0.995968	[-0.18,0.2]	chr1	413	-1	1546	588	200	758	MARCKSL1	TAG	TAGC
1800	ENST00000329433.10	0.0768391	-0.0362091	-0.113244	0.0946503	0.303172	0.190124	-0.112901	0.126727	-0.112901	0.126727	0.674746	[-0.26,0.03]	chr5	754	-1	2114	1419	35	660	HNRNPH1	TAA	TAAT
1801	ENST00000329563.8	0.0372062	0.0232825	-0.0154061	0.921799	1.88534	1.87142	-0.0133729	0.934515	-0.0133729	0.934515	0.995613	[-0.33,0.3]	chr22	319	1	955	510	226	219	TSPO	TGA	TGAG
1802	ENST00000329687.8	-0.048284	0.179777	0.224856	0.399047	1.08831	1.31637	0.229838	0.374269	0.224856	0.399047	0.895855	[-0.3,0.73]	chr4	42	-1	2173	1368	535	270	MFSD10	TAG	TAGC
1803	ENST00000329967.11	0.133075	0.382756	0.248329	0.167472	0.866088	1.11577	0.250756	0.169457	0.250756	0.169457	0.752267	[-0.11,0.61]	chr14	533	1	752	528	55	169	SIVA1	TGA	TGAG
1804	ENST00000329970.8	0.0321789	-0.114447	-0.14778	0.386462	-1.06527	-1.2119	-0.14594	0.517591	-0.14594	0.517591	0.927676	[-0.58,0.3]	chr6	674	1	788	642	64	82	GTF3C6	TAG	TAGA
1805	ENST00000330029.6	0.158468	-0.210066	-0.369083	0.000638303	0.608405	0.23987	-0.368432	0.00215502	-0.368432	0.00215502	0.0770924	[-0.6,-0.13]	chr22	143	1	916	192	30	694	UQCR10	TAG	TAGT
1806	ENST00000330062.7	-0.121979	0.111695	0.231572	0.255068	-0.168628	0.0650468	0.235121	0.334396	0.235121	0.334396	0.854469	[-0.24,0.72]	chr15	474	-1	2694	1359	114	1221	IDH2	TAG	TAGG
1807	ENST00000330125.10	-0.0820922	-0.423543	-0.344375	0.151888	0.0244448	-0.317006	-0.340477	0.24172	-0.340477	0.24172	0.804957	[-0.91,0.23]	chr22	174	-1	3647	2958	176	513	EIF4ENIF1	TGA	TGAG
1808	ENST00000330133.5	-0.128759	-0.247698	-0.121289	0.546883	0.798369	0.67943	-0.118066	0.58552	-0.118066	0.58552	0.948521	[-0.54,0.31]	chr19	114	1	608	417	19	172	MRPL54	TAG	TAGC
1809	ENST00000330188.13	0.0500527	-0.0955595	-0.146117	0.185079	-1.07212	-1.21773	-0.145342	0.309762	-0.145342	0.309762	0.852891	[-0.42,0.14]	chr1	1168	-1	2108	747	86	1275	TPM3	TAG	TAGA
1810	ENST00000330263.5	0.0364719	-0.0689125	-0.106113	0.435869	-0.063851	-0.169235	-0.104873	0.52671	-0.104873	0.52671	0.931919	[-0.43,0.22]	chr1	228	1	2049	720	31	1298	MRTO4	TGA	TGAA
1811	ENST00000330280.11	0.132738	0.296403	0.162328	0.383972	-0.562246	-0.398582	0.165434	0.494541	0.165434	0.494541	0.923469	[-0.31,0.65]	chr5	207	-1	2077	1188	288	601	GTF2H2	TGA	TGAT
1812	ENST00000330317.6	-0.108483	0.6243	0.730399	0.00351264	0.342029	1.07481	0.735552	0.00835012	0.735552	0.00835012	0.18121	[0.19,1.29]	chr21	155	-1	1471	1239	36	196	WDR4	TGA	TGAT
1813	ENST00000330342.8	0.0255871	0.0479155	0.0208047	0.912811	-0.937894	-0.915566	0.0236472	0.924856	0.0236472	0.924856	0.994489	[-0.49,0.55]	chr12	900	1	6507	2571	213	3723	ATP6V0A2	TGA	TGAT
1814	ENST00000330374.6	-0.0162673	-0.0726125	-0.0566367	0.747851	-3.08376	-3.1401	-0.0554377	0.826811	-0.0554377	0.826811	0.988946	[-0.54,0.44]	chrX	684	1	4717	306	105	4306	VMA21	TAA	TAAA
1815	ENST00000330503.12	-0.0610132	-0.021085	0.0385153	0.832023	-0.324219	-0.284291	0.0408275	0.850329	0.0408275	0.850329	0.988946	[-0.39,0.48]	chr5	729	-1	2099	1869	16	214	DDX41	TGA	TGAG
1816	ENST00000330560.8	-0.021957	-0.0656998	-0.045732	0.826939	0.0594998	0.0157568	-0.0426636	0.869682	-0.0426636	0.869682	0.989347	[-0.54,0.46]	chr8	133	1	3486	3072	241	173	CDCA2	TAA	TAAT
1817	ENST00000330579.6	0.00387784	0.031057	0.0251384	0.913698	1.65436	1.68154	0.0277903	0.875017	0.0251384	0.913698	0.991192	[-0.39,0.42]	chr12	927	1	1650	1551	32	67	NOC4L	TGA	TGAC
1818	ENST00000330634.11	0.118297	-0.0975097	-0.220428	0.446272	1.52593	1.31012	-0.214374	0.450733	-0.214374	0.450733	0.917292	[-0.77,0.34]	chr14	531	1	7578	3723	143	3712	INF2	TGA	TGAG
1819	ENST00000330720.7	-0.127307	0.112627	0.239625	0.0200035	0.979754	1.21969	0.240258	0.023006	0.240258	0.023006	0.309837	[0.03,0.45]	chr19	956	-1	1550	639	193	718	KDELR1	TAG	TAGC
1820	ENST00000330843.8	0.0848157	-0.248744	-0.335447	0.111698	-0.578655	-0.912215	-0.332472	0.218696	-0.332472	0.218696	0.780814	[-0.86,0.2]	chr8	188	-1	7811	3852	13	3946	RAB11FIP1	TAA	TAAA
1821	ENST00000330899.5	0.0771263	-0.00259914	-0.0800774	0.345892	0.191458	0.111733	-0.0794535	0.404683	-0.0794535	0.404683	0.898374	[-0.27,0.11]	chr9	110	1	2319	1194	121	1004	DNAJA1	TAA	TAAT
1822	ENST00000330964.10	0.0940361	-0.0414349	-0.136898	0.430045	0.666711	0.53124	-0.134847	0.487493	-0.134847	0.487493	0.922714	[-0.51,0.25]	chr15	249	-1	6110	255	72	5783	RPS27L	TAA	TAAT
1823	ENST00000330978.3	-0.0469034	0.248618	0.294141	0.0919659	0.413822	0.709344	0.296787	0.128001	0.296787	0.128001	0.677591	[-0.09,0.68]	chr16	338	-1	1012	459	513	40	BOLA2	TGA	TGAG
1824	ENST00000331079.11	0.135988	-0.245618	-0.383069	0.0168183	0.27471	-0.106896	-0.380982	0.0427667	-0.380982	0.0427667	0.436527	[-0.75,-0.01]	chr11	251	1	2552	1596	31	925	PRMT3	TGA	TGAA
1825	ENST00000331128.5	0.0804499	-0.268893	-0.35	0.00828348	3.10073	2.75139	-0.349147	0.000253754	-0.35	0.00828348	0.180619	[-0.62,-0.09]	chr1	1042	-1	530	393	97	40	HIST2H2AB	TAA	TAAT
1826	ENST00000331129.3	-0.0625996	-0.0467144	0.0147946	0.918676	0.699217	0.715102	0.0162731	0.913523	0.0147946	0.918676	0.992126	[-0.27,0.29]	chr2	21	1	623	405	110	108	ID2	TGA	TGAA
1827	ENST00000331134.11	-0.168629	0.201242	0.368825	0.028039	-1.02172	-0.651854	0.371095	0.0942462	0.371095	0.0942462	0.605264	[-0.06,0.81]	chr17	1014	-1	4381	1827	182	2372	NPLOC4	TAG	TAGG
1828	ENST00000331173.5	-0.012148	0.0716621	0.0822574	0.630216	0.0651393	0.148949	0.0847854	0.675247	0.0847854	0.675247	0.970985	[-0.31,0.49]	chr10	210	-1	4105	1851	42	2212	CSTF2T	TGA	TGAA
1829	ENST00000331200.8	0.0392638	-0.14282	-0.182988	0.178213	1.34828	1.1662	-0.181715	0.186689	-0.181715	0.186689	0.753792	[-0.45,0.09]	chr15	171	1	2141	759	87	1295	DUT	TAA	TAAA
1830	ENST00000331244.10	-0.0185995	0.0773453	0.0951764	0.43078	0.361089	0.457033	0.0962935	0.482483	0.0962935	0.482483	0.922714	[-0.17,0.37]	chr10	662	1	1318	1008	30	280	GLRX3	TAA	TAAT
1831	ENST00000331268.9	0.029183	0.0240394	-0.00553238	0.953347	-0.0427738	-0.0479174	-0.00481077	0.965983	-0.00481077	0.965983	0.999541	[-0.23,0.22]	chr15	406	1	2359	1089	204	1066	MORF4L1	TGA	TGAG
1832	ENST00000331320.12	-0.0718128	0.366487	0.437012	0.00679236	-0.668525	-0.230225	0.439384	0.0326868	0.439384	0.0326868	0.370477	[0.04,0.85]	chr14	548	1	2871	2148	209	514	MTA1	TAG	TAGG
1833	ENST00000331334.5	-0.0107102	0.217185	0.22679	0.192528	-0.98119	-0.753295	0.22908	0.319151	0.22908	0.319151	0.853516	[-0.22,0.69]	chr14	471	1	1103	474	40	589	GLRX5	TGA	TGAG
1834	ENST00000331454.3	-0.0942026	-0.160434	-0.0706694	0.792423	1.14701	1.08078	-0.0653155	0.818699	-0.0653155	0.818699	0.988946	[-0.62,0.49]	chr22	265	1	1660	1389	19	252	TAB1	TAG	TAGG
1835	ENST00000331457.8	-0.0301101	-0.00186705	0.0277196	0.816206	0.166085	0.194328	0.0287342	0.833648	0.0287342	0.833648	0.988946	[-0.24,0.3]	chr22	173	1	1746	1104	161	481	DRG1	TGA	TGAA
1836	ENST00000331479.3	0.0376004	0.0419182	0.00116098	0.995847	1.09413	1.09845	0.0058049	0.978195	0.00116098	0.995847	0.999541	[-0.49,0.48]	chr22	305	1	1567	324	74	1169	SMDT1	TAA	TAAC
1837	ENST00000331523.6	-0.00452025	-0.401421	-0.396975	4.37141e-11	-2.0578	-2.4547	-0.396795	7.08245e-09	-0.396795	7.08245e-09	3.6034e-06	[-0.53,-0.26]	chr6	550	-1	1923	1389	245	289	EEF1A1	TGA	TGAA
1838	ENST00000331569.6	-0.159231	0.0199773	0.17869	0.28585	2.5908	2.77001	0.179531	0.0984025	0.17869	0.28585	0.837435	[-0.15,0.49]	chr8	183	1	3316	1773	198	1345	ZNF703	TAA	TAAC
1839	ENST00000331573.7	0.0327051	-0.123327	-0.157078	0.266423	0.390736	0.234703	-0.15577	0.333175	-0.15577	0.333175	0.854469	[-0.47,0.16]	chr21	128	-1	2154	867	466	821	PSMG1	TGA	TGAT
1840	ENST00000331738.12	0.189848	0.126226	-0.0648135	0.685822	-0.522287	-0.585909	-0.062747	0.762313	-0.062747	0.762313	0.985125	[-0.46,0.34]	chr12	874	-1	3461	1305	83	2073	RSRC2	TGA	TGAA
1841	ENST00000331768.10	0.000991745	0.363522	0.361389	0.0344758	-1.44158	-1.07905	0.364228	0.123051	0.364228	0.123051	0.666574	[-0.1,0.83]	chr14	483	-1	2856	1785	140	931	SETD3	TAG	TAGC
1842	ENST00000331821.7	-0.0529102	0.0759631	0.128669	0.10963	0.246911	0.375784	0.129023	0.157459	0.129023	0.157459	0.725444	[-0.05,0.31]	chr22	37	1	837	606	102	129	RANBP1	TAA	TAAA
1843	ENST00000331825.11	0.00947314	0.0432702	0.0330424	0.867419	-2.94997	-2.91617	0.035876	0.900441	0.035876	0.900441	0.989629	[-0.55,0.62]	chr19	982	1	871	528	199	144	FTL	TAA	TAAG
1844	ENST00000331835.10	0.020249	0.0776526	0.0568741	0.602318	-0.314933	-0.257529	0.0577907	0.663957	0.0577907	0.663957	0.968262	[-0.2,0.32]	chr1	787	-1	1542	498	15	1029	SELENOF	TAA	TAAA
1845	ENST00000331923.9	0.0159675	-0.186355	-0.203614	0.367619	-1.26874	-1.47106	-0.200965	0.507605	-0.200965	0.507605	0.925971	[-0.79,0.39]	chr21	88	-1	3892	2754	87	1051	PAXBP1	TAG	TAGA
1846	ENST00000332065.9	0.0167267	0.0958309	0.0776809	0.657637	-0.847251	-0.768147	0.0805509	0.724587	0.0805509	0.724587	0.979015	[-0.37,0.54]	chr17	948	-1	4596	1962	3	2631	EXOC7	TGA	TGAG
1847	ENST00000332118.11	-0.0415913	-0.0647751	-0.0242778	0.871701	0.602054	0.57887	-0.0225321	0.896472	-0.0225321	0.896472	0.989629	[-0.36,0.32]	chr11	1099	-1	2986	1917	91	978	SRPRA	TAA	TAAC
1848	ENST00000332180.9	0.0175614	-0.26007	-0.279298	0.145434	-0.490894	-0.768526	-0.276648	0.25564	-0.276648	0.25564	0.809647	[-0.75,0.2]	chr12	716	1	5812	3522	87	2203	WASHC4	TGA	TGAT
1849	ENST00000332245.9	0.00953974	-0.00305494	-0.0132391	0.93445	-1.28904	-1.30163	-0.0115514	0.957855	-0.0115514	0.957855	0.998184	[-0.43,0.41]	chr6	420	1	1494	1170	153	171	KLHDC3	TGA	TGAG
1850	ENST00000332312.4	-0.0889804	0.0485109	0.134271	0.582757	-0.093645	0.0438461	0.139262	0.615123	0.139262	0.615123	0.954531	[-0.41,0.69]	chr20	267	-1	3791	2301	184	1306	EMILIN3	TAG	TAGA
1851	ENST00000332395.6	0.0768649	-0.155804	-0.23681	0.373063	0.873762	0.641093	-0.231651	0.429697	-0.231651	0.429697	0.907557	[-0.8,0.34]	chr16	588	-1	2169	1623	240	306	DDX28	TGA	TGAT
1852	ENST00000332435.10	-0.0239666	0.141193	0.161691	0.530673	0.156467	0.321626	0.167206	0.57298	0.167206	0.57298	0.945718	[-0.42,0.76]	chr6	181	1	851	381	260	210	ZNRD1	TGA	TGAC
1853	ENST00000332499.3	-0.00725663	-0.0999074	-0.0950549	0.682115	-0.209503	-0.302154	-0.0910292	0.751365	-0.0910292	0.751365	0.984689	[-0.65,0.47]	chr17	652	1	3600	1080	689	1831	HEXIM1	TAG	TAGA
1854	ENST00000332556.5	-0.00236335	-0.0311154	-0.0302187	0.85904	0.792085	0.763332	-0.0279039	0.884212	-0.0279039	0.884212	0.989347	[-0.4,0.35]	chr13	283	1	2701	1254	196	1251	LAMP1	TAG	TAGC
1855	ENST00000332598.6	-0.0374321	0.0423508	0.0791164	0.481059	0.887223	0.967006	0.0801335	0.492933	0.0801335	0.492933	0.923469	[-0.15,0.31]	chr5	731	1	1473	708	57	708	TMED9	TAG	TAGC
1856	ENST00000332707.10	-0.0425859	0.0460799	0.088402	0.401432	-1.75478	-1.66611	0.0889625	0.528649	0.0889625	0.528649	0.933175	[-0.19,0.37]	chr12	553	1	6370	2889	487	2994	XPOT	TGA	TGAG
1857	ENST00000332810.4	0.0319501	0.209697	0.176408	0.356051	-1.1809	-1.00315	0.17979	0.488179	0.17979	0.488179	0.922714	[-0.33,0.7]	chr15	455	1	3072	978	107	1987	AEN	TGA	TGAG
1858	ENST00000333003.10	0.0423589	0.134116	0.0890093	0.724419	-0.178446	-0.0866887	0.0944056	0.761659	0.0944056	0.761659	0.984929	[-0.52,0.72]	chr12	658	-1	4058	1812	246	2000	NR2C1	TGA	TGAA
1859	ENST00000333119.7	-0.000427478	-0.0641056	-0.0654318	0.704143	0.585994	0.522316	-0.0629442	0.745253	-0.0629442	0.745253	0.982424	[-0.44,0.32]	chrX	184	-1	574	474	56	44	UXT	TGA	TGAC
1860	ENST00000333130.3	-0.078204	-0.0794108	-0.00210105	0.983456	0.828126	0.826919	-0.000960458	0.995863	-0.000960458	0.995863	0.999541	[-0.29,0.29]	chr22	26	1	1387	621	653	113	MRPL40	TAG	TAGA
1861	ENST00000333167.13	-0.0713051	-0.27692	-0.208442	0.374058	0.724005	0.518389	-0.204812	0.432684	-0.204812	0.432684	0.908599	[-0.71,0.31]	chr3	151	-1	1699	1275	92	332	ACAA1	TGA	TGAG
1862	ENST00000333188.10	0.0771628	-0.193278	-0.270891	0.00420537	0.57456	0.304119	-0.270293	0.0102524	-0.270293	0.0102524	0.21339	[-0.48,-0.06]	chr3	701	-1	3275	2721	97	457	COPB2	TGA	TGAC
1863	ENST00000333449.9	-0.0274291	0.38469	0.41052	0.0392421	0.514633	0.926752	0.413527	0.0663153	0.413527	0.0663153	0.524453	[-0.03,0.86]	chr11	538	1	1043	660	30	353	TMEM179B	TGA	TGAA
1864	ENST00000333479.12	0.0622801	-0.086764	-0.149795	0.333249	-0.737438	-0.886482	-0.148314	0.458494	-0.148314	0.458494	0.922714	[-0.54,0.24]	chr12	875	1	6974	6630	176	168	KNTC1	TAA	TAAA
1865	ENST00000333503.7	0.0255951	0.405986	0.378971	0.0392239	0.642955	1.02335	0.381513	0.0522249	0.381513	0.0522249	0.476065	[0,0.77]	chr16	94	-1	2727	966	30	1731	PGP	TAA	TAAA
1866	ENST00000333511.8	0.0335202	-0.0326728	-0.066543	0.558218	1.4694	1.40321	-0.0661545	0.386815	-0.066543	0.558218	0.941466	[-0.3,0.16]	chr19	9	1	1977	1158	70	749	BSG	TGA	TGAG
1867	ENST00000333628.4	-0.0831379	0.0213898	0.103394	0.521963	0.978227	1.08275	0.105219	0.520386	0.103394	0.521963	0.927676	[-0.21,0.41]	chr6	14	-1	1616	1338	81	197	TUBB2A	TAA	TAAA
1868	ENST00000333651.11	-0.0913707	-0.31688	-0.227855	0.265061	-0.0930361	-0.318545	-0.224639	0.355914	-0.224639	0.355914	0.867802	[-0.7,0.25]	chr19	107	1	1585	954	69	562	HMG20B	TGA	TGAG
1869	ENST00000333725.9	0.0039919	-0.0878449	-0.0933706	0.646193	-0.852205	-0.944042	-0.0907774	0.733442	-0.0907774	0.733442	0.980803	[-0.61,0.43]	chr15	223	1	4719	2121	235	2363	TCF12	TAA	TAAA
1870	ENST00000333762.6	-0.162762	0.0748271	0.236803	0.122612	1.76039	1.99798	0.237867	0.0568996	0.236803	0.122612	0.666116	[-0.06,0.53]	chr3	640	-1	1516	642	384	490	H1FX	TGA	TGAG
1871	ENST00000333926.6	0.0340539	-0.234649	-0.27024	0.157193	0.00670632	-0.261997	-0.267677	0.248526	-0.267677	0.248526	0.808592	[-0.72,0.19]	chr10	217	1	2375	327	112	1936	CISD1	TAA	TAAA
1872	ENST00000334121.11	0.0478688	0.0135359	-0.0352439	0.849904	-1.09473	-1.12906	-0.0332459	0.895363	-0.0332459	0.895363	0.989629	[-0.52,0.45]	chr5	188	1	6699	1875	77	4747	SREK1	TAG	TAGG
1873	ENST00000334163.4	-0.0161742	0.0552897	0.070079	0.705587	-0.117137	-0.0456737	0.0725292	0.744924	0.0725292	0.744924	0.982424	[-0.37,0.52]	chr1	1002	1	3777	1605	190	1982	POLR3C	TGA	TGAT
1874	ENST00000334192.8	-0.146544	-0.124052	0.0204695	0.92605	-0.839889	-0.817398	0.0238366	0.935813	0.0238366	0.935813	0.995837	[-0.59,0.64]	chr14	488	1	4064	2505	134	1425	EML1	TAG	TAGT
1875	ENST00000334220.9	0.0139708	-0.122419	-0.137887	0.391015	0.319299	0.182909	-0.135687	0.465244	-0.135687	0.465244	0.922714	[-0.5,0.23]	chr14	366	1	2813	1362	38	1413	DLST	TAG	TAGG
1876	ENST00000334256.9	0.0228968	-0.076096	-0.0998828	0.480316	-0.61848	-0.717473	-0.0983857	0.584564	-0.0983857	0.584564	0.948521	[-0.45,0.25]	chr3	798	-1	8952	1566	289	7097	KPNA4	TAG	TAGA
1877	ENST00000334344.11	-0.032552	-0.0537248	-0.0225975	0.902488	-0.453236	-0.474409	-0.0200603	0.933344	-0.0200603	0.933344	0.995292	[-0.48,0.44]	chr12	280	1	8598	5508	131	2959	ARID2	TGA	TGAA
1878	ENST00000334370.8	0.0797643	-0.0799297	-0.161288	0.432762	-0.970861	-1.13055	-0.15832	0.557173	-0.15832	0.557173	0.940661	[-0.68,0.37]	chr19	804	1	10966	8337	635	1994	MEGF8	TGA	TGAC
1879	ENST00000334444.11	0.0212892	-0.0102069	-0.0333407	0.861184	0.00269342	-0.0288028	-0.0304194	0.898016	-0.0304194	0.898016	0.989629	[-0.49,0.43]	chr3	865	-1	5790	4314	110	1366	ABCC5	TGA	TGAC
1880	ENST00000334463.4	0.115446	0.0282941	-0.088596	0.639165	-0.0372894	-0.124441	-0.0861892	0.714011	-0.0861892	0.714011	0.977846	[-0.54,0.37]	chrX	350	-1	4218	3753	116	349	ERCC6L	TGA	TGAG
1881	ENST00000334464.7	0.0223048	0.0780526	0.0551128	0.781814	-2.70327	-2.64752	0.057594	0.839412	0.057594	0.839412	0.988946	[-0.51,0.64]	chr10	593	-1	9672	3465	213	5994	PDZD8	TAG	TAGC
1882	ENST00000334478.9	0.0111401	-0.310539	-0.322293	0.00574463	0.235943	-0.0857362	-0.321565	0.0177419	-0.321565	0.0177419	0.273536	[-0.59,-0.06]	chr12	412	1	596	465	26	105	PFDN5	TGA	TGAG
1883	ENST00000334583.11	-0.0253203	0.0235045	0.044996	0.870223	1.07588	1.12471	0.0499956	0.845063	0.044996	0.870223	0.989347	[-0.47,0.55]	chr16	568	1	4462	4308	103	51	CARMIL2	TGA	TGAT
1884	ENST00000334635.10	-0.0988671	-0.0392023	0.0582207	0.785776	-1.41446	-1.3548	0.0614252	0.831808	0.0614252	0.831808	0.988946	[-0.51,0.64]	chr4	198	1	4222	879	90	3253	DCUN1D4	TAG	TAGG
1885	ENST00000334678.8	0.0221956	0.332994	0.309411	0.0988098	-0.727337	-0.416538	0.312412	0.192693	0.312412	0.192693	0.758005	[-0.16,0.79]	chr22	269	-1	820	411	10	399	RPS19BP1	TAG	TAGG
1886	ENST00000334705.12	0.00760578	0.180959	0.172063	0.371706	-2.09268	-1.91933	0.175526	0.521349	0.175526	0.521349	0.927676	[-0.36,0.72]	chr8	491	1	5529	2517	264	2748	FAM91A1	TAA	TAAT
1887	ENST00000334743.9	0.00681842	0.18644	0.178906	0.232005	-1.32608	-1.14646	0.180455	0.371976	0.180455	0.371976	0.877793	[-0.22,0.58]	chr14	500	1	4328	1575	48	2705	PPP2R5C	TAG	TAGC
1888	ENST00000334828.6	-0.0355885	-0.0672497	-0.0321011	0.734696	-0.676461	-0.708122	-0.0313716	0.783725	-0.0313716	0.783725	0.987154	[-0.26,0.19]	chr10	445	1	1802	765	117	920	PGAM1	TGA	TGAA
1889	ENST00000334944.9	-0.0959167	0.0357379	0.131153	0.2506	1.20567	1.33733	0.131912	0.244763	0.131153	0.2506	0.809623	[-0.09,0.35]	chr11	586	-1	3094	1917	394	783	SF1	TGA	TGAG
1890	ENST00000334955.13	0.0810271	0.0291078	-0.0530505	0.776454	-0.864842	-0.916762	-0.0508724	0.838871	-0.0508724	0.838871	0.988946	[-0.53,0.43]	chr7	343	1	6406	2541	11	3854	RSBN1L	TAA	TAAA
1891	ENST00000334982.8	0.0368896	0.132004	0.0937875	0.585778	0.15789	0.253004	0.0962595	0.633296	0.0962595	0.633296	0.959497	[-0.3,0.5]	chr20	116	1	1260	537	281	442	NAA20	TAA	TAAC
1892	ENST00000335183.11	-0.0209105	-0.0284064	-0.00929292	0.964734	-0.324072	-0.331568	-0.00576732	0.983989	-0.00576732	0.983989	0.999541	[-0.54,0.53]	chr14	223	1	841	639	62	140	CDKN3	TAA	TAAA
1893	ENST00000335255.10	-0.0761946	0.790118	0.864838	4.35299e-05	-2.08484	-1.21852	0.870424	0.0052324	0.870424	0.0052324	0.139992	[0.26,1.5]	chr17	1055	1	5243	1983	157	3103	FOXK2	TAG	TAGC
1894	ENST00000335508.10	0.199925	0.0810278	-0.119175	0.134486	0.0228528	-0.0960443	-0.11867	0.192792	-0.11867	0.192792	0.758005	[-0.3,0.06]	chr2	859	-1	6526	3915	92	2519	SF3B1	TAA	TAAT
1895	ENST00000335626.8	0.0188182	0.0799616	0.059983	0.747957	-1.17047	-1.10932	0.0627205	0.803992	0.0627205	0.803992	0.988428	[-0.44,0.57]	chr22	308	-1	6237	5817	135	285	TCF20	TGA	TGAG
1896	ENST00000335647.9	0.0515549	0.0366013	-0.0170525	0.929633	0.265624	0.25067	-0.0135387	0.955662	-0.0135387	0.955662	0.997714	[-0.48,0.45]	chr6	829	-1	1684	1476	45	163	KATNA1	TAA	TAAA
1897	ENST00000335698.4	0.0171163	-0.0343533	-0.0519074	0.563723	0.454884	0.403414	-0.0513386	0.60549	-0.0513386	0.60549	0.953842	[-0.25,0.14]	chr10	37	1	1078	894	31	153	ATP5F1C	TAA	TAAA
1898	ENST00000335727.13	-0.0257362	-0.0787547	-0.0545356	0.779685	-1.12994	-1.18296	-0.0515117	0.842268	-0.0515117	0.842268	0.988946	[-0.55,0.46]	chr22	272	1	17933	5172	194	12567	TNRC6B	TGA	TGAA
1899	ENST00000335754.8	0.0998093	0.0537164	-0.0473949	0.79796	-0.0295848	-0.0756778	-0.0451209	0.845539	-0.0451209	0.845539	0.988946	[-0.49,0.41]	chr3	375	-1	3579	1875	51	1653	ACTR8	TGA	TGAA
1900	ENST00000335895.12	0.0482406	-0.133359	-0.181731	0.016543	-0.443172	-0.624771	-0.181527	0.0451992	-0.181527	0.0451992	0.451065	[-0.36,0]	chr5	220	1	897	489	151	257	BTF3	TGA	TGAA
1901	ENST00000335968.8	-0.00179457	-0.261747	-0.261966	0.245994	-0.166069	-0.426022	-0.259188	0.351406	-0.259188	0.351406	0.861857	[-0.8,0.29]	chr15	519	-1	3481	2409	86	986	TARSL2	TGA	TGAA
1902	ENST00000336023.9	-0.00279531	-0.111748	-0.109047	0.0471154	-0.120459	-0.229411	-0.108957	0.0720477	-0.108957	0.0720477	0.543667	[-0.23,0.01]	chr12	320	-1	1627	1356	95	176	TUBA1B	TAA	TAAT
1903	ENST00000336032.3	0.0555995	0.0205471	-0.0366315	0.865256	-0.290591	-0.325644	-0.0334656	0.903508	-0.0334656	0.903508	0.989633	[-0.57,0.5]	chr6	602	1	2065	984	117	964	PNRC1	TAG	TAGA
1904	ENST00000336133.8	0.133674	-0.0302017	-0.164874	0.275655	0.116161	-0.0477141	-0.163328	0.364305	-0.163328	0.364305	0.871099	[-0.51,0.19]	chr12	463	-1	898	633	23	242	SARNP	TGA	TGAT
1905	ENST00000336138.4	-0.0283346	0.0785737	0.103876	0.659522	-0.142829	-0.0359211	0.108676	0.695301	0.108676	0.695301	0.975128	[-0.44,0.66]	chr8	541	1	2239	627	124	1488	THEM6	TGA	TGAC
1906	ENST00000336216.9	0.109172	0.359899	0.249434	0.189297	-1.30847	-1.05774	0.252555	0.33503	0.252555	0.33503	0.854469	[-0.26,0.78]	chr15	389	1	3805	1044	121	2640	HMG20A	TAG	TAGG
1907	ENST00000336233.10	0.0566507	0.18305	0.125418	0.392959	0.472897	0.599297	0.127228	0.440566	0.127228	0.440566	0.910767	[-0.2,0.45]	chr10	383	-1	2496	1200	40	1256	LIPA	TGA	TGAA
1908	ENST00000336273.8	-0.0734867	0.252295	0.325426	0.00345461	-1.31642	-0.990635	0.32652	0.0277375	0.32652	0.0277375	0.342751	[0.04,0.62]	chr8	405	1	7662	1749	323	5590	MTDH	TGA	TGAA
1909	ENST00000336283.7	-0.0391234	-0.342395	-0.305462	0.163824	0.389724	0.0864526	-0.302874	0.235695	-0.302874	0.235695	0.801392	[-0.8,0.2]	chr5	485	-1	2107	711	764	632	SRA1	TAA	TAAT
1910	ENST00000336314.9	-0.0967691	0.0214182	0.117709	0.260144	-1.40994	-1.29176	0.118503	0.382483	0.118503	0.382483	0.881868	[-0.15,0.39]	chr5	609	1	6652	3060	83	3509	LARP1	TGA	TGAA
1911	ENST00000336430.11	0.153755	-0.198132	-0.354801	0.111689	0.580732	0.228844	-0.3509	0.170096	-0.3509	0.170096	0.752267	[-0.85,0.15]	chrX	102	-1	1675	1320	132	223	ACOT9	TAA	TAAG
1912	ENST00000336470.8	0.029482	0.0918727	0.0612539	0.671716	0.880486	0.942876	0.0630218	0.675128	0.0630218	0.675128	0.970985	[-0.23,0.36]	chrX	273	1	2357	1749	139	469	GNL3L	TAA	TAAT
1913	ENST00000336615.9	-0.119823	0.196608	0.315007	0.163072	2.21293	2.52936	0.317409	0.0656709	0.315007	0.163072	0.737282	[-0.13,0.73]	chr11	35	1	2416	1515	190	711	PNPLA2	TGA	TGAG
1914	ENST00000336735.9	-0.075306	0.226022	0.299818	0.0935	-0.407145	-0.105817	0.302736	0.177013	0.302736	0.177013	0.752562	[-0.14,0.75]	chr14	409	-1	7919	2385	109	5425	SEL1L	TAA	TAAT
1915	ENST00000336767.5	0.0399653	0.0531322	0.0122113	0.92903	0.141839	0.155006	0.0137314	0.929321	0.0137314	0.929321	0.99511	[-0.3,0.33]	chr5	81	1	1926	1062	363	501	BRIX1	TAA	TAAG
1916	ENST00000336812.5	0.0974085	0.0547877	-0.0428993	0.61768	0.239255	0.196634	-0.0423898	0.666396	-0.0423898	0.666396	0.969169	[-0.24,0.15]	chr4	122	-1	2998	2388	161	449	DHX15	TGA	TGAA
1917	ENST00000336868.8	-0.0452009	0.263252	0.306852	0.155021	-0.340099	-0.0316465	0.310484	0.254778	0.310484	0.254778	0.809647	[-0.22,0.85]	chr17	9	-1	3045	1308	98	1639	NXN	TAG	TAGC
1918	ENST00000337018.10	-0.0374193	-0.138157	-0.101708	0.51738	-0.46073	-0.561468	-0.100217	0.613504	-0.100217	0.613504	0.954353	[-0.49,0.29]	chr19	503	-1	3640	3249	134	257	SUGP2	TAG	TAGT
1919	ENST00000337130.9	-0.139009	-0.182523	-0.0455336	0.815814	0.268002	0.224489	-0.0424767	0.85163	-0.0424767	0.85163	0.988946	[-0.49,0.4]	chr2	286	1	2338	1527	476	335	UGP2	TGA	TGAA
1920	ENST00000337138.9	0.0345308	0.112759	0.0775791	0.537036	0.193961	0.272188	0.0786853	0.588625	0.0786853	0.588625	0.949655	[-0.21,0.37]	chr14	271	1	3946	2481	292	1173	HIF1A	TGA	TGAG
1921	ENST00000337190.7	-0.0933305	0.641133	0.732364	0.000870279	-0.949996	-0.215533	0.737942	0.0111817	0.737942	0.0111817	0.213843	[0.17,1.32]	chr4	34	-1	3871	630	129	3112	MXD4	TAG	TAGG
1922	ENST00000337288.9	-0.0565288	0.0452474	0.101066	0.454594	-2.50254	-2.40076	0.102393	0.588273	0.102393	0.588273	0.949655	[-0.27,0.48]	chr2	456	-1	3368	1113	384	1871	STARD7	TGA	TGAC
1923	ENST00000337303.8	0.0403976	0.147286	0.105968	0.513694	-0.295866	-0.188979	0.107725	0.59016	0.107725	0.59016	0.949856	[-0.29,0.5]	chr3	359	-1	4825	4749	3	73	PBRM1	TAA	TAAT
1924	ENST00000337392.10	0.0678126	0.0294422	-0.0395121	0.780478	1.03252	0.994149	-0.0378927	0.801252	-0.0378927	0.801252	0.987866	[-0.33,0.26]	chr19	868	1	2470	2010	16	444	CLPTM1	TAG	TAGT
1925	ENST00000337393.10	0.0510517	0.00206688	-0.0497181	0.749253	-1.26671	-1.31569	-0.0478893	0.818044	-0.0478893	0.818044	0.988946	[-0.45,0.36]	chr1	803	-1	5541	3984	63	1494	ZNF644	TAG	TAGA
1926	ENST00000337432.9	0.0733814	-0.252757	-0.327648	0.0478366	0.44296	0.116822	-0.325585	0.0837048	-0.325585	0.0837048	0.578505	[-0.69,0.04]	chr17	787	1	2562	1131	42	1389	RAD51C	TAA	TAAC
1927	ENST00000337488.11	0.0656494	-0.133789	-0.200753	0.243926	0.125879	-0.073559	-0.198716	0.335236	-0.198716	0.335236	0.854469	[-0.6,0.21]	chr4	206	1	3396	1785	198	1413	FIP1L1	TAG	TAGG
1928	ENST00000337619.11	-0.0840057	-0.175062	-0.0934285	0.644504	0.344245	0.253189	-0.089957	0.701612	-0.089957	0.701612	0.977022	[-0.55,0.37]	chr7	494	1	1226	477	39	710	AP1S1	TAG	TAGC
1929	ENST00000337620.8	0.0461722	-0.0194755	-0.066086	0.477135	-0.527569	-0.593216	-0.0653462	0.563993	-0.0653462	0.563993	0.945217	[-0.29,0.16]	chr7	128	1	2128	552	428	1148	CBX3	TAA	TAAT
1930	ENST00000337623.7	0.0398213	0.23456	0.193316	0.31084	-0.665628	-0.470889	0.196461	0.427264	0.196461	0.427264	0.906179	[-0.29,0.69]	chr10	646	1	4387	3615	105	667	EDRF1	TGA	TGAC
1931	ENST00000337659.11	0.052915	0.0214628	-0.0321874	0.822626	-1.0292	-1.06066	-0.0308927	0.871992	-0.0308927	0.871992	0.989347	[-0.4,0.34]	chr6	20	1	7517	3024	126	4367	PRPF4B	TAA	TAAA
1932	ENST00000337859.11	0.0311191	0.0826078	0.0510468	0.654572	-0.466274	-0.414785	0.052029	0.711927	0.052029	0.711927	0.977152	[-0.23,0.33]	chr2	820	1	2032	1281	123	628	ZC3H15	TGA	TGAC
1933	ENST00000337943.9	-0.0169352	-0.105645	-0.0897908	0.524418	0.603976	0.515266	-0.0882732	0.568	-0.0882732	0.568	0.945217	[-0.39,0.22]	chr17	1032	-1	1890	951	443	496	PYCR1	TGA	TGAG
1934	ENST00000337970.7	-0.010093	-0.0740776	-0.0641963	0.458836	0.463609	0.399624	-0.0638508	0.514815	-0.0638508	0.514815	0.927676	[-0.26,0.13]	chr10	154	-1	2186	1248	323	615	HNRNPF	TAG	TAGT
1935	ENST00000338034.9	-0.0898437	-0.159752	-0.0706068	0.549188	0.598594	0.528685	-0.0697457	0.588978	-0.0697457	0.588978	0.949655	[-0.32,0.18]	chr17	225	-1	3767	2481	80	1206	ELAC2	TGA	TGAA
1936	ENST00000338045.7	0.00291506	0.14803	0.143263	0.495255	-0.38563	-0.240516	0.146883	0.57638	0.146883	0.57638	0.946379	[-0.37,0.67]	chr2	535	1	1876	1164	263	449	LIMS1	TAA	TAAG
1937	ENST00000338128.12	-0.0517864	-0.0811061	-0.0305654	0.850674	1.72081	1.6915	-0.0288092	0.851263	-0.0288092	0.851263	0.988946	[-0.33,0.27]	chr19	488	-1	2420	1677	218	525	ISYNA1	TGA	TGAG
1938	ENST00000338179.6	-0.0264817	-0.118558	-0.0922698	0.250917	0.179116	0.0870394	-0.0918514	0.316952	-0.0918514	0.316952	0.852891	[-0.27,0.09]	chr1	1717	-1	3812	1848	164	1800	LBR	TAA	TAAT
1939	ENST00000338193.11	0.0597545	-0.196521	-0.257428	0.103906	0.486055	0.22978	-0.255977	0.160312	-0.255977	0.160312	0.731146	[-0.61,0.1]	chr12	501	-1	1423	1263	25	135	PRIM1	TGA	TGAA
1940	ENST00000338205.9	-0.02687	-0.180615	-0.154288	0.231212	-0.313044	-0.46679	-0.153537	0.335376	-0.153537	0.335376	0.854469	[-0.46,0.16]	chr9	397	-1	7078	5520	220	1338	ECPAS	TAA	TAAA
1941	ENST00000338222.6	-0.0778641	-0.226287	-0.150065	0.429002	1.89973	1.75131	-0.148081	0.388961	-0.150065	0.429002	0.907408	[-0.54,0.22]	chrX	291	1	4230	1875	235	2120	UBQLN2	TAA	TAAT
1942	ENST00000338244.6	-0.0921716	-0.0328119	0.057329	0.777295	-0.479368	-0.420008	0.0603574	0.809297	0.0603574	0.809297	0.988946	[-0.44,0.57]	chr20	65	-1	6953	1953	386	4614	SLC23A2	TAG	TAGC
1943	ENST00000338382.10	0.0330837	-0.262222	-0.296685	0.104638	-0.497136	-0.792442	-0.294448	0.202017	-0.294448	0.202017	0.7668	[-0.75,0.16]	chr9	66	1	5765	5406	33	326	FOCAD	TGA	TGAA
1944	ENST00000338517.8	0.0471991	-0.0519336	-0.100442	0.580093	-1.11319	-1.21232	-0.0978944	0.684915	-0.0978944	0.684915	0.973902	[-0.57,0.38]	chr4	530	1	1864	369	45	1450	SCOC	TAA	TAAG
1945	ENST00000338758.11	-0.00453467	-0.382112	-0.380203	0.0843588	-0.195169	-0.572747	-0.37687	0.16427	-0.37687	0.16427	0.739564	[-0.91,0.16]	chr22	328	1	5429	1095	63	4271	PARVB	TGA	TGAC
1946	ENST00000338791.11	0.0145752	0.40776	0.391562	0.0468677	-1.43626	-1.04307	0.395631	0.143691	0.395631	0.143691	0.706042	[-0.14,0.94]	chr7	620	-1	2611	1800	81	730	IMPDH1	TGA	TGAG
1947	ENST00000338825.5	-0.17843	0.0693805	0.246888	0.0946303	-0.0304631	0.217347	0.24856	0.147221	0.24856	0.147221	0.710155	[-0.09,0.59]	chr8	191	1	827	357	40	430	EIF4EBP1	TAA	TAAA
1948	ENST00000338946.10	-0.0293366	-0.207746	-0.180407	0.3554	0.673425	0.495016	-0.177775	0.41426	-0.177775	0.41426	0.903915	[-0.6,0.25]	chrX	268	-1	4651	2847	505	1299	PHF8	TGA	TGAA
1949	ENST00000338961.11	0.0558268	0.108758	0.0514656	0.774823	0.0672038	0.120135	0.0539794	0.791026	0.0539794	0.791026	0.987349	[-0.35,0.46]	chr9	518	-1	1598	1134	12	452	PTGES2	TGA	TGAA
1950	ENST00000338972.8	-0.0218618	0.435902	0.456237	0.0344921	-1.69189	-1.23413	0.461043	0.129474	0.461043	0.129474	0.681006	[-0.14,1.07]	chr5	129	-1	1814	1104	427	283	PAIP1	TAA	TAAA
1951	ENST00000339077.10	0.0749238	-0.187246	-0.264975	0.28794	-0.0800181	-0.342189	-0.26062	0.397306	-0.26062	0.397306	0.895855	[-0.86,0.34]	chr7	110	1	5619	1761	242	3616	KLHL7	TGA	TGAA
1952	ENST00000339209.9	-0.102076	0.233252	0.333854	0.0570194	-0.33527	5.90008e-05	0.336398	0.116904	0.336398	0.116904	0.65122	[-0.08,0.76]	chr6	914	-1	2167	1497	569	101	PHF10	TAA	TAAA
1953	ENST00000339374.10	-0.0391156	0.165196	0.20307	0.261597	-0.0259707	0.178341	0.205698	0.346294	0.205698	0.346294	0.861857	[-0.22,0.64]	chr14	35	1	1749	1371	233	145	METTL17	TGA	TGAT
1954	ENST00000339399.5	-0.111117	0.0530247	0.163286	0.241683	1.28472	1.44886	0.164526	0.188244	0.163286	0.241683	0.804957	[-0.11,0.43]	chr9	342	1	1483	756	215	512	ANP32B	TAA	TAAG
1955	ENST00000339413.11	0.0262557	0.239631	0.211422	0.288838	1.0713	1.28467	0.214543	0.27336	0.211422	0.288838	0.83845	[-0.18,0.59]	chr19	686	-1	2769	945	30	1794	YIF1B	TGA	TGAG
1956	ENST00000339450.10	-0.0656468	-0.263656	-0.200631	0.373982	0.151919	-0.0460907	-0.197354	0.463168	-0.197354	0.463168	0.922714	[-0.72,0.33]	chr9	30	-1	5377	2715	90	2572	ERMP1	TAA	TAAT
1957	ENST00000339486.8	-0.0251069	0.0548173	0.0786787	0.685045	-0.923651	-0.843727	0.0811511	0.749619	0.0811511	0.749619	0.98344	[-0.42,0.59]	chr18	71	1	3574	1560	153	1861	RIOK3	TAG	TAGC
1958	ENST00000339514.8	-0.00398603	-0.0772674	-0.0743744	0.643287	-0.0289426	-0.102224	-0.0726531	0.710272	-0.0726531	0.710272	0.977022	[-0.45,0.31]	chr2	846	1	5026	3237	360	1429	MYO1B	TAA	TAAC
1959	ENST00000339526.8	-0.0129964	0.145942	0.158537	0.0712047	-0.715993	-0.557055	0.159182	0.146932	0.159182	0.146932	0.710155	[-0.06,0.38]	chr1	1471	-1	3942	1122	1309	1511	GLUL	TAA	TAAG
1960	ENST00000339570.9	-0.0723782	0.281418	0.352318	0.0434404	0.15102	0.504817	0.355144	0.0720487	0.355144	0.0720487	0.543667	[-0.03,0.75]	chr12	906	-1	3329	1521	197	1611	SCARB1	TGA	TGAG
1961	ENST00000339600.6	-0.0214402	0.00772075	0.0283978	0.810771	0.364446	0.393607	0.0294262	0.820638	0.0294262	0.820638	0.988946	[-0.23,0.29]	chr7	70	-1	2035	246	96	1693	NDUFA4	TAA	TAAA
1962	ENST00000339647.6	0.241499	-0.21429	-0.455827	1.31215e-13	0.953614	0.497826	-0.455827	3.89767e-13	-0.455827	3.89767e-13	8.92371e-10	[-0.58,-0.33]	chr12	907	-1	2193	2058	67	68	UBC	TAA	TAAG
1963	ENST00000339697.5	0.0919551	-0.211652	-0.303968	0.00215043	0.377376	0.0737686	-0.303375	0.00680592	-0.303375	0.00680592	0.164044	[-0.52,-0.08]	chr6	721	-1	3125	1362	70	1693	SERINC1	TGA	TGAG
1964	ENST00000340253.9	0.0853839	-0.412131	-0.500159	0.0233319	-0.164442	-0.661956	-0.496924	0.0668562	-0.496924	0.0668562	0.525102	[-1.03,0.03]	chr5	557	1	4424	3567	168	689	FBXO38	TAA	TAAT
1965	ENST00000340281.9	-0.0808495	0.202613	0.282189	0.0612772	0.15588	0.439342	0.284237	0.0983223	0.284237	0.0983223	0.611029	[-0.05,0.62]	chr1	801	1	9729	1749	148	7832	ZNF326	TAA	TAAA
1966	ENST00000340308.7	-0.0722182	0.412133	0.483315	0.0264663	-1.57668	-1.09233	0.487237	0.110991	0.487237	0.110991	0.638474	[-0.11,1.1]	chr7	694	-1	2955	1332	112	1511	SLC37A3	TGA	TGAC
1967	ENST00000340342.10	0.0420003	0.218408	0.174591	0.339539	0.424485	0.600893	0.1777	0.390791	0.1777	0.390791	0.889167	[-0.23,0.59]	chr9	276	1	1436	1002	155	279	CTSL	TGA	TGAG
1968	ENST00000340344.4	-0.0830664	0.0155877	0.0968841	0.616618	-0.321999	-0.223345	0.100086	0.675122	0.100086	0.675122	0.970985	[-0.37,0.57]	chr21	156	1	4676	327	66	4283	NDUFV3	TGA	TGAG
1969	ENST00000340381.11	-0.0469204	0.207813	0.251114	0.3727	1.17651	1.43124	0.256898	0.354807	0.251114	0.3727	0.877973	[-0.3,0.78]	chr1	112	1	3815	2001	20	1794	TMEM201	TGA	TGAC
1970	ENST00000340384.5	-0.00558859	-0.26786	-0.262553	0.00134984	1.38181	1.11954	-0.262234	0.000826064	-0.262553	0.00134984	0.0594319	[-0.43,-0.1]	chr9	688	1	1563	1338	74	151	TUBB4B	TAG	TAGA
1971	ENST00000340385.6	-0.0520345	-0.187554	-0.135693	0.0931368	0.437669	0.302149	-0.135405	0.133619	-0.135405	0.133619	0.686328	[-0.31,0.04]	chr1	1425	1	1690	675	63	952	PRDX6	TAA	TAAG
1972	ENST00000340413.7	0.0612887	-0.00425812	-0.0662224	0.573291	-0.572458	-0.638005	-0.0649909	0.661399	-0.0649909	0.661399	0.967547	[-0.36,0.23]	chr6	831	-1	3831	1143	34	2654	NUP43	TAG	TAGA
1973	ENST00000340473.8	0.0785327	-0.0881107	-0.169066	0.43353	0.09354	-0.0731036	-0.165293	0.523973	-0.165293	0.523973	0.929476	[-0.67,0.34]	chr13	126	1	2228	750	146	1332	GTF2F2	TAA	TAAG
1974	ENST00000340541.4	0.00631499	0.256376	0.249124	0.112176	-0.0156393	0.234422	0.251009	0.182752	0.251009	0.182752	0.752562	[-0.12,0.62]	chr18	37	1	1227	885	195	147	VAPA	TAG	TAGA
1975	ENST00000340578.10	-0.0431415	-0.139721	-0.0978139	0.546397	0.345988	0.249408	-0.0958695	0.610044	-0.0958695	0.610044	0.954353	[-0.46,0.27]	chr19	169	-1	3233	1704	58	1471	RANBP3	TAG	TAGC
1976	ENST00000340611.9	0.0240498	-0.0754799	-0.10152	0.593446	1.62952	1.52999	-0.099058	0.575513	-0.10152	0.593446	0.95231	[-0.49,0.28]	chr7	27	-1	2779	2466	54	259	BRAT1	TGA	TGAG
1977	ENST00000340645.9	0.0282198	-0.231563	-0.260548	0.0521881	-0.377259	-0.637042	-0.259505	0.119067	-0.259505	0.119067	0.658657	[-0.58,0.07]	chr3	572	-1	11187	9780	126	1281	GOLGB1	TAG	TAGA
1978	ENST00000340648.6	-0.0413641	0.0498114	0.0905805	0.428835	-0.900922	-0.809747	0.0915038	0.537149	0.0915038	0.537149	0.933437	[-0.2,0.39]	chr21	164	1	5078	2277	105	2696	RRP1B	TGA	TGAG
1979	ENST00000340748.8	0.101258	-0.0973734	-0.199106	0.0563072	0.448939	0.250307	-0.198443	0.0937702	-0.198443	0.0937702	0.604752	[-0.43,0.03]	chr19	269	-1	5408	4851	236	321	DNMT1	TAG	TAGT
1980	ENST00000340766.9	-0.0734421	0.433095	0.50612	3.31972e-08	-0.502812	0.00372527	0.507038	6.56427e-06	0.507038	6.56427e-06	0.0012007	[0.29,0.73]	chr12	771	-1	1472	1014	232	226	PPP1CC	TGA	TGAC
1981	ENST00000340857.3	-0.047173	0.198387	0.244659	0.0692646	-0.38878	-0.14322	0.246399	0.139538	0.246399	0.139538	0.696861	[-0.08,0.58]	chr22	230	1	2344	585	452	1307	H1F0	TGA	TGAC
1982	ENST00000340934.10	-0.0167827	0.198229	0.213696	0.222421	-1.08297	-0.867959	0.216622	0.35053	0.216622	0.35053	0.861857	[-0.24,0.68]	chr1	1701	1	4104	1236	395	2473	BROX	TAA	TAAA
1983	ENST00000340941.11	-0.0567618	-0.148385	-0.0928331	0.511591	0.707429	0.615805	-0.0911405	0.55387	-0.0911405	0.55387	0.93958	[-0.39,0.21]	chr5	209	1	3624	1692	86	1846	MCCC2	TAA	TAAC
1984	ENST00000341068.8	-0.00289164	-0.159049	-0.157203	0.329484	-1.12521	-1.28137	-0.155542	0.4645	-0.155542	0.4645	0.922714	[-0.57,0.26]	chr2	552	-1	7762	5835	276	1651	ANAPC1	TGA	TGAC
1985	ENST00000341142.7	-0.0621177	-0.215409	-0.155796	0.464183	0.249841	0.0965495	-0.152477	0.544153	-0.152477	0.544153	0.93556	[-0.64,0.34]	chr2	1009	1	1524	1263	72	189	GMPPA	TGA	TGAG
1986	ENST00000341162.8	0.0574819	0.0245169	-0.034541	0.858317	-0.802007	-0.834973	-0.0315012	0.901786	-0.0315012	0.901786	0.989629	[-0.52,0.46]	chr14	364	1	4341	597	54	3690	FCF1	TAA	TAAT
1987	ENST00000341223.7	0.0626617	-0.037329	-0.10102	0.473042	-0.54068	-0.640671	-0.0994597	0.571167	-0.0994597	0.571167	0.945718	[-0.44,0.24]	chr14	147	-1	3131	501	152	2478	CFL2	TAA	TAAA
1988	ENST00000341247.8	-0.0136896	-0.0315724	-0.0195717	0.92001	-0.267186	-0.285069	-0.0168735	0.948268	-0.0168735	0.948268	0.995968	[-0.5,0.47]	chr12	346	-1	3706	2280	150	1276	LIMA1	TGA	TGAC
1989	ENST00000341318.9	-0.0764327	0.101509	0.175876	0.412091	0.029621	0.207562	0.179796	0.483636	0.179796	0.483636	0.922714	[-0.32,0.69]	chr11	623	1	2080	1641	16	423	KAT5	TGA	TGAC
1990	ENST00000341355.9	-0.0585586	0.62695	0.684111	0.000629129	-1.31488	-0.629367	0.688549	0.0128234	0.688549	0.0128234	0.228476	[0.15,1.24]	chr12	573	1	714	555	155	4	RAP1B	TAA	TAAT
1991	ENST00000341369.11	-0.0629639	-0.108679	-0.0460332	0.546537	-1.82869	-1.87441	-0.045624	0.638558	-0.045624	0.638558	0.959975	[-0.24,0.14]	chr2	1067	1	1212	336	191	685	PTMA	TAG	TAGA
1992	ENST00000341376.10	-0.190958	-0.158885	0.0298794	0.890216	-0.317607	-0.285534	0.0332461	0.895152	0.0332461	0.895152	0.989629	[-0.47,0.54]	chr6	385	1	3811	1044	201	2566	NFYA	TAA	TAAC
1993	ENST00000341446.9	-0.0877497	0.0910797	0.177968	0.391105	-2.12791	-1.94909	0.18077	0.537197	0.18077	0.537197	0.933437	[-0.4,0.77]	chr12	909	1	6703	756	146	5801	BRI3BP	TGA	TGAA
1994	ENST00000341463.5	-0.0348183	0.463266	0.497044	0.0173192	-1.7497	-1.25162	0.500922	0.0926242	0.500922	0.0926242	0.601904	[-0.08,1.1]	chr12	482	1	1411	636	144	631	NABP2	TAG	TAGC
1995	ENST00000341516.9	-0.0130218	-0.0275221	-0.0161593	0.941343	-0.91879	-0.933291	-0.0126274	0.967155	-0.0126274	0.967155	0.999541	[-0.58,0.56]	chr14	312	-1	5953	2829	148	2976	DCAF5	TGA	TGAT
1996	ENST00000341541.8	-0.00826608	0.0383988	0.0446011	0.834875	0.122804	0.169469	0.0479474	0.845676	0.0479474	0.845676	0.988946	[-0.45,0.55]	chr11	1128	-1	1304	678	470	156	THYN1	TAA	TAAC
1997	ENST00000341567.8	-0.100286	0.189742	0.288696	0.171035	-1.90002	-1.60999	0.292359	0.32529	0.292359	0.32529	0.853516	[-0.29,0.88]	chr7	277	1	4229	945	255	3029	TMEM248	TAA	TAAT
1998	ENST00000341590.8	0.0552785	-0.0340184	-0.0907915	0.58121	-0.0906859	-0.179983	-0.088448	0.65679	-0.088448	0.65679	0.966293	[-0.48,0.3]	chr14	220	-1	3286	2043	139	1104	FERMT2	TGA	TGAA
1999	ENST00000341676.9	-0.067284	0.186266	0.250888	0.253451	-0.326005	-0.0724548	0.25517	0.334063	0.25517	0.334063	0.854469	[-0.26,0.78]	chr1	212	-1	3681	3477	177	27	ATP13A2	TAG	TAGC
[truncated: 2,580 more rows]

## Sheet: Untr vs G418 - 2.0 mg|mL 24hr
	tr_id	mRNA_log2FC	RPF_log2FC	log2FC_TE_v1	pvalue_v1	control_log2TE	g418_2K_log2TE	log2FC_TE_v2	pvalue_v2	log2FC_TE_final	pvalue_final	pvalue.adjust	CI(95%)	chrom	featnum	strand	mrna_len	cds_len	X5utr_len	X3utr_len	gene_name	stopcodon	stop4nt
1	ENST00000000233.10	-0.126266	0.293963	0.419638	0.002191	0.616085	1.03631	0.421075	0.00328957	0.421075	0.00328957	0.0597486	[0.14,0.7]	chr7	612	1	1032	543	88	401	ARF5	TAA	TAAC
2	ENST00000000412.8	-0.143334	0.161792	0.30422	0.0599496	-0.552529	-0.247403	0.306334	0.128986	0.306334	0.128986	0.50875	[-0.09,0.71]	chr12	112	-1	2450	834	159	1457	M6PR	TAG	TAGA
3	ENST00000001008.6	-0.00224873	-0.0405498	-0.0385277	0.650923	0.359295	0.320994	-0.03812	0.673057	-0.03812	0.673057	0.915392	[-0.21,0.14]	chr12	17	1	3715	1380	170	2165	FKBP4	TAG	TAGC
4	ENST00000002165.10	0.135102	0.130565	-0.00510732	0.971043	0.102988	0.0984515	-0.00380492	0.983231	-0.00380492	0.983231	0.999997	[-0.33,0.33]	chr6	808	-1	2356	1404	56	896	FUCA2	TAA	TAAA
5	ENST00000003100.13	0.0844224	0.124525	0.0396055	0.731068	-0.458092	-0.41799	0.0408294	0.767554	0.0408294	0.767554	0.942321	[-0.23,0.32]	chr7	380	-1	3155	1530	113	1512	CYP51A1	TGA	TGAA
6	ENST00000003302.8	0.00619857	-0.314705	-0.321947	0.0924663	-1.15664	-1.47754	-0.31983	0.206282	-0.31983	0.206282	0.617681	[-0.81,0.18]	chr11	954	-1	4669	3234	69	1366	USP28	TAA	TAAG
7	ENST00000005257.7	-0.205343	-0.124242	0.0788146	0.729927	-0.458143	-0.377043	0.0828539	0.765417	0.0828539	0.765417	0.942071	[-0.47,0.64]	chr7	187	1	2787	621	291	1875	RALA	TAA	TAAT
8	ENST00000005260.9	-0.0344452	0.211006	0.24378	0.284479	-0.488987	-0.243536	0.248544	0.391304	0.248544	0.391304	0.787161	[-0.32,0.83]	chr7	422	-1	3645	1536	238	1871	BAIAP2L1	TGA	TGAG
9	ENST00000005286.8	0.0355147	0.0295274	-0.00801038	0.966164	0.602379	0.596392	-0.00448524	0.987723	-0.00448524	0.987723	0.999997	[-0.47,0.47]	chr11	482	1	3480	3075	153	252	TMEM132A	TGA	TGAC
10	ENST00000005340.10	-0.0549769	-0.0140741	0.039528	0.833551	-0.0466974	-0.00579474	0.0424556	0.846608	0.0424556	0.846608	0.962805	[-0.4,0.49]	chr17	126	-1	2989	2211	255	523	DVL2	TAG	TAGC
11	ENST00000005386.8	0.027517	0.0692639	0.0407916	0.797238	0.323103	0.36485	0.0428459	0.812184	0.0428459	0.812184	0.951731	[-0.31,0.4]	chr12	287	-1	4339	1998	85	2256	RPAP3	TGA	TGAT
12	ENST00000005558.8	0.322618	1.06983	0.746063	0.000529716	-1.46829	-0.721078	0.752536	0.0177446	0.752536	0.0177446	0.180412	[0.13,1.4]	chr7	564	1	1834	1356	470	8	IFRD1	TAG	TAGA
13	ENST00000006777.11	0.0435693	0.0399995	-0.00520409	0.978108	0.474913	0.471343	-0.00180125	0.997003	-0.00180125	0.997003	0.999997	[-0.51,0.51]	chr7	325	1	1721	1095	49	577	RHBDD2	TGA	TGAG
14	ENST00000007390.3	-0.0705312	0.327457	0.396042	0.0819428	-0.496498	-0.09851	0.400968	0.165072	0.400968	0.165072	0.562835	[-0.17,0.98]	chr16	51	-1	1210	939	74	197	TSR3	TGA	TGAG
15	ENST00000007516.8	0.0475963	-0.29727	-0.345467	0.0035097	1.65329	1.30842	-0.344609	0.00159382	-0.345467	0.0035097	0.0615516	[-0.58,-0.11]	chr16	290	-1	665	471	26	168	NDUFAB1	TAA	TAAA
16	ENST00000011473.6	-0.0449531	-0.17189	-0.128031	0.434265	1.10559	0.978654	-0.126356	0.446973	-0.126356	0.446973	0.815252	[-0.45,0.2]	chr7	540	-1	2127	780	47	1300	SYPL1	TAA	TAAT
17	ENST00000011619.6	-0.0622772	-0.0439981	0.0166275	0.930667	-0.102478	-0.0841986	0.0195078	0.928751	0.0166275	0.930667	0.988858	[-0.36,0.4]	chr6	65	-1	3384	2190	330	864	RANBP9	TAG	TAGC
18	ENST00000012443.8	0.0260212	-0.160222	-0.186958	0.13718	0.6665	0.480257	-0.185763	0.16284	-0.185763	0.16284	0.560256	[-0.45,0.08]	chr19	911	1	2109	1500	103	506	PPP5C	TGA	TGAG
19	ENST00000013070.11	0.0104885	-0.0383263	-0.0497161	0.770137	-0.519314	-0.568129	-0.0475231	0.826689	-0.0475231	0.826689	0.955598	[-0.47,0.38]	chr14	448	1	3494	1278	36	2180	UBR7	TAG	TAGA
20	ENST00000013125.8	-0.0698158	0.138554	0.20738	0.339153	-1.50263	-1.29426	0.21116	0.480537	0.21116	0.480537	0.832102	[-0.38,0.81]	chr14	200	-1	4354	2541	319	1494	MAP4K5	TAA	TAAG
21	ENST00000014930.9	-0.344234	0.132829	0.473178	0.174489	1.45664	1.93371	0.479864	0.106372	0.473178	0.174489	0.575469	[-0.21,1.12]	chr12	166	-1	1159	570	151	438	HEBP1	TGA	TGAG
22	ENST00000016946.8	0.0542819	0.344538	0.288651	0.196203	-0.911732	-0.621476	0.293647	0.321472	0.293647	0.321472	0.726774	[-0.29,0.89]	chr2	542	1	7268	5298	161	1809	RGPD5	TGA	TGAG
23	ENST00000019317.8	-0.0582778	0.370654	0.42797	0.0481339	-2.10034	-1.6714	0.432885	0.169568	0.432885	0.169568	0.568983	[-0.19,1.07]	chr18	33	1	4368	1968	223	2177	RALBP1	TGA	TGAG
24	ENST00000022615.9	0.0549222	-0.136441	-0.19178	0.0638329	0.411453	0.22009	-0.191089	0.089567	-0.191089	0.089567	0.4264	[-0.41,0.03]	chr8	226	1	1418	852	91	475	VDAC3	TAA	TAAT
25	ENST00000025008.10	0.0557581	-0.312734	-0.369628	0.0299691	-1.6751	-2.04359	-0.367517	0.108857	-0.367517	0.108857	0.466143	[-0.81,0.08]	chr8	250	-1	6636	4785	527	1324	RB1CC1	TAA	TAAC
26	ENST00000025301.4	-0.0729098	-0.137965	-0.0665415	0.70639	-0.1801	-0.245155	-0.0637386	0.764728	-0.0637386	0.764728	0.94168	[-0.48,0.35]	chr13	113	1	9915	5706	176	4033	AKAP11	TAG	TAGA
27	ENST00000037243.7	0.202336	-0.373574	-0.576639	7.40087e-05	0.752906	0.176996	-0.575372	0.000406462	-0.575372	0.000406462	0.0124244	[-0.89,-0.26]	chr16	662	1	974	354	108	512	GABARAPL2	TGA	TGAG
28	ENST00000037869.7	-0.0260882	0.275187	0.300243	0.0565686	-1.54468	-1.2434	0.303046	0.158798	0.303046	0.158798	0.554649	[-0.12,0.73]	chr2	326	-1	1810	417	79	1314	FAM136A	TAA	TAAA
29	ENST00000039989.9	-0.0676415	0.153488	0.219628	0.341418	-0.939311	-0.718182	0.224084	0.460555	0.224084	0.460555	0.822795	[-0.37,0.83]	chr11	315	1	4488	3426	35	1027	TTC17	TAG	TAGT
30	ENST00000040663.8	0.0572528	-0.031172	-0.0891252	0.530639	-0.06806	-0.156485	-0.0874983	0.607172	-0.0874983	0.607172	0.888613	[-0.42,0.25]	chr19	369	1	3178	1110	67	2001	MRI1	TAA	TAAC
31	ENST00000040738.10	0.0582654	-0.214176	-0.273741	0.118292	-0.31863	-0.591072	-0.271422	0.209524	-0.271422	0.209524	0.620783	[-0.69,0.15]	chr4	96	-1	10567	9156	138	1273	BOD1L1	TAA	TAAT
32	ENST00000040877.2	0.00121103	0.151684	0.149659	0.319324	-0.5289	-0.378426	0.151412	0.420183	0.151412	0.420183	0.798519	[-0.22,0.53]	chr1	1785	-1	5206	4866	76	264	TARBP1	TGA	TGAT
33	ENST00000042381.9	0.00922347	-0.00405063	-0.017943	0.935544	2.30097	2.28769	-0.0109023	0.971621	-0.0109023	0.971621	0.999535	[-0.56,0.54]	chr16	566	1	4092	3660	109	323	RIPOR1	TAA	TAAA
34	ENST00000053468.4	0.124878	0.246715	0.120745	0.475052	-0.682547	-0.56071	0.123479	0.572904	0.123479	0.572904	0.879354	[-0.31,0.56]	chr6	406	-1	2100	606	12	1482	MRPS10	TAA	TAAA
35	ENST00000053867.8	0.142292	-0.114673	-0.25757	0.063927	1.54437	1.2874	-0.256581	0.0385025	-0.25757	0.063927	0.366143	[-0.54,0.02]	chr17	633	1	2130	1782	40	308	GRN	TGA	TGAG
36	ENST00000054666.11	-0.129624	-0.064412	0.0640233	0.741128	-1.62566	-1.56044	0.0672449	0.801385	0.0672449	0.801385	0.950851	[-0.47,0.61]	chr1	97	1	2178	303	88	1787	VAMP3	TGA	TGAA
37	ENST00000055077.8	0.0615191	-0.306734	-0.369198	0.00854539	0.257431	-0.110822	-0.367818	0.0232548	-0.367818	0.0232548	0.212731	[-0.68,-0.05]	chr7	310	-1	1685	1065	16	604	RFC2	TAG	TAGA
38	ENST00000060969.5	-0.11852	0.186374	0.303772	0.1077	-1.15061	-0.845714	0.307107	0.225215	0.307107	0.225215	0.639663	[-0.19,0.81]	chr1	951	-1	2190	624	70	1496	SIKE1	TAA	TAAC
39	ENST00000066544.8	-0.0669584	0.125947	0.19224	0.162531	-1.31404	-1.12114	0.193732	0.284264	0.193732	0.284264	0.702826	[-0.16,0.55]	chr17	670	-1	5830	2475	123	3232	CDC27	TAA	TAAC
40	ENST00000078429.9	-0.127392	0.43096	0.557003	0.00731194	-1.2952	-0.73685	0.561498	0.0492989	0.561498	0.0492989	0.321372	[0,1.13]	chr19	96	1	4190	1080	290	2820	GNA11	TGA	TGAG
41	ENST00000081029.8	0.090722	0.0610478	-0.030685	0.827842	0.353819	0.324145	-0.0290403	0.857068	-0.0290403	0.857068	0.9652	[-0.34,0.28]	chr12	235	1	1829	972	12	845	MRPS35	TGA	TGAA
42	ENST00000083182.8	0.0230376	0.338888	0.314656	0.10262	-0.973974	-0.658125	0.318351	0.21589	0.318351	0.21589	0.630079	[-0.19,0.83]	chr17	806	-1	6492	1758	311	4423	APPBP2	TGA	TGAG
43	ENST00000155674.9	-0.215588	0.040131	0.254889	0.116074	0.0233542	0.279073	0.256675	0.173945	0.256675	0.173945	0.57519	[-0.11,0.63]	chr22	5	-1	1735	1182	43	510	HDHD5	TGA	TGAG
44	ENST00000156109.7	0.108485	-0.227802	-0.338301	0.135945	0.932711	0.596424	-0.335033	0.17539	-0.335033	0.17539	0.576406	[-0.82,0.15]	chrX	216	-1	1658	1431	13	214	GPKOW	TGA	TGAC
45	ENST00000156471.10	0.0672744	0.0304631	-0.0381351	0.826082	-0.0852712	-0.122083	-0.0353123	0.868301	-0.0353123	0.868301	0.968854	[-0.45,0.38]	chr15	55	-1	9597	4458	129	5010	AQR	TAG	TAGC
46	ENST00000157812.6	0.0630658	-0.294163	-0.35786	0.0025827	1.12733	0.7701	-0.356973	0.00277085	-0.356973	0.00277085	0.0534242	[-0.59,-0.12]	chr19	738	1	1591	1257	198	136	PSMC4	TGA	TGAC
47	ENST00000158771.9	0.0380103	0.232953	0.193604	0.375683	-0.485342	-0.290399	0.197277	0.481283	0.197277	0.481283	0.832116	[-0.35,0.76]	chr17	103	-1	4167	720	17	3430	DERL2	TAA	TAAA
48	ENST00000159111.9	-0.21732	-0.194102	0.020808	0.934013	0.50273	0.525948	0.0248954	0.919849	0.020808	0.934013	0.990614	[-0.45,0.48]	chr19	151	1	5604	3291	226	2087	KDM4B	TAG	TAGG
49	ENST00000160827.8	-0.135614	-0.429086	-0.294136	0.0215695	0.871209	0.577737	-0.29329	0.0255732	-0.29329	0.0255732	0.222484	[-0.55,-0.04]	chr16	346	1	2113	1998	40	75	KIF22	TGA	TGAC
50	ENST00000161863.9	0.14466	0.0501306	-0.0954102	0.526247	0.148096	0.0535657	-0.0937741	0.598602	-0.0937741	0.598602	0.884714	[-0.44,0.26]	chr5	340	1	6305	4293	202	1810	YTHDC2	TGA	TGAC
51	ENST00000162044.13	0.146873	-0.0666276	-0.21434	0.182539	1.70304	1.48954	-0.213076	0.139615	-0.21434	0.182539	0.588468	[-0.54,0.1]	chr19	506	-1	1820	1440	65	315	TMEM161A	TAG	TAGC
52	ENST00000162330.10	0.120012	0.0875156	-0.034992	0.877702	1.14118	1.10868	-0.0309153	0.90457	-0.0309153	0.90457	0.981895	[-0.51,0.46]	chr16	656	-1	4085	2613	142	1330	BCAR1	TGA	TGAG
53	ENST00000163416.7	-0.0650752	0.221832	0.285454	0.210204	-1.1316	-0.844688	0.289825	0.346913	0.289825	0.346913	0.749365	[-0.32,0.91]	chr14	442	1	2879	2196	182	501	GOLGA5	TGA	TGAA
54	ENST00000166345.8	0.0478343	-0.179154	-0.227798	0.115279	-0.233129	-0.460117	-0.226339	0.197218	-0.226339	0.197218	0.604313	[-0.57,0.12]	chr5	10	1	2431	1299	115	1017	TRIP13	TGA	TGAT
55	ENST00000168216.10	0.0523919	-0.29955	-0.352497	0.00406801	0.851724	0.499782	-0.351611	0.0061372	-0.351611	0.0061372	0.0889185	[-0.6,-0.1]	chrX	266	-1	960	786	28	146	HSD17B10	TGA	TGAA
56	ENST00000170447.12	-0.0362247	0.144624	0.179587	0.313749	-0.64045	-0.459602	0.182429	0.422377	0.182429	0.422377	0.799897	[-0.26,0.64]	chr3	57	1	2775	1251	64	1460	MKRN2	TAA	TAAA
57	ENST00000173229.7	0.0243267	0.478605	0.45249	0.0755851	-0.296042	0.158236	0.458158	0.151578	0.458158	0.151578	0.548872	[-0.17,1.1]	chr17	200	1	5986	1815	139	4032	NTN1	TAG	TAGC
58	ENST00000173527.6	-0.0333969	0.205542	0.238038	0.144568	-0.165674	0.0732652	0.240321	0.218087	0.240321	0.218087	0.631014	[-0.14,0.63]	chr5	386	1	1942	897	18	1027	ISOC1	TAG	TAGG
59	ENST00000175091.5	-0.115692	-0.0542892	0.0606682	0.676789	1.37127	1.43267	0.0618465	0.65004	0.0606682	0.676789	0.917454	[-0.22,0.34]	chr2	64	-1	1365	702	108	555	LAPTM4A	TGA	TGAA
60	ENST00000179259.6	-0.0323258	-0.202685	-0.172141	0.433771	-0.218223	-0.388583	-0.168831	0.53723	-0.168831	0.53723	0.860897	[-0.7,0.37]	chr12	30	1	8209	813	59	7337	TIGAR	TAA	TAAG
61	ENST00000181839.10	0.00356168	-0.0671325	-0.0720111	0.712886	-0.969393	-1.04009	-0.0692128	0.791132	-0.0692128	0.791132	0.947657	[-0.57,0.44]	chr7	188	1	9525	4539	386	4600	CDK13	TGA	TGAG
62	ENST00000184266.3	0.130501	-0.136989	-0.267961	0.0384829	1.11827	0.850781	-0.267205	0.0458758	-0.267205	0.0458758	0.306241	[-0.53,0]	chr3	563	1	651	390	24	237	NDUFB4	TAA	TAAG
63	ENST00000184956.10	-0.0553762	0.147116	0.200361	0.418801	-0.304889	-0.102397	0.205288	0.50288	0.205288	0.50288	0.844252	[-0.4,0.82]	chr17	802	-1	3932	3546	17	369	HEATR6	TGA	TGAA
64	ENST00000185150.9	0.0439135	0.612063	0.56691	0.0111706	-1.53682	-0.968668	0.57241	0.0715444	0.57241	0.0715444	0.388166	[-0.05,1.21]	chr2	249	1	2446	1452	167	827	ERLEC1	TAA	TAAA
65	ENST00000186436.10	-0.0970142	0.155065	0.250392	0.227682	0.297977	0.550056	0.253804	0.283269	0.253804	0.283269	0.70229	[-0.21,0.72]	chr2	480	-1	6701	5652	286	763	TMEM131	TAA	TAAA
66	ENST00000188312.6	0.203027	0.157848	-0.0467016	0.799486	0.386252	0.341072	-0.0438974	0.841334	-0.0438974	0.841334	0.959201	[-0.46,0.38]	chr12	680	1	2464	1191	765	508	ACTR6	TAA	TAAG
67	ENST00000193403.10	-0.119599	0.105779	0.224509	0.13915	0.788462	1.01384	0.226246	0.147089	0.226246	0.147089	0.539793	[-0.08,0.53]	chr14	311	-1	3779	2679	384	716	ACTN1	TAA	TAAT
68	ENST00000194118.8	0.127186	-0.0286445	-0.158441	0.508169	0.256554	0.100724	-0.153373	0.591419	-0.153373	0.591419	0.88438	[-0.71,0.41]	chr5	525	1	2203	1548	87	568	DELE1	TAA	TAAG
69	ENST00000196061.5	0.116211	0.105885	-0.0112552	0.9379	0.0678717	0.0575458	-0.00922467	0.95952	-0.00922467	0.95952	0.998041	[-0.35,0.34]	chr1	145	1	2976	2184	63	729	PLOD1	TAA	TAAT
70	ENST00000196371.10	-0.110758	-0.332882	-0.223733	0.230501	0.0270747	-0.19505	-0.220996	0.318402	-0.220996	0.318402	0.724206	[-0.65,0.21]	chr5	116	-1	3294	1563	67	1664	OXCT1	TGA	TGAA
71	ENST00000196551.8	-0.159119	-0.152923	0.00596104	0.946527	0.243065	0.249261	0.00632232	0.934802	0.00596104	0.946527	0.994121	[-0.16,0.17]	chr19	1272	1	741	615	72	54	RPS5	TGA	TGAT
72	ENST00000197268.13	0.0147515	0.0718185	0.0553761	0.802344	0.36496	0.422027	0.0591623	0.807777	0.0591623	0.807777	0.951731	[-0.42,0.55]	chr12	167	1	4711	1869	23	2819	FAM234B	TAA	TAAT
73	ENST00000199320.9	-0.0156766	0.308358	0.322944	0.0838239	0.0994727	0.423507	0.325864	0.135344	0.325864	0.135344	0.521282	[-0.1,0.76]	chr5	175	-1	2831	942	133	1756	DIMT1	TAG	TAGG
74	ENST00000199389.11	-0.180168	0.0271639	0.206846	0.119358	-0.813261	-0.605929	0.208001	0.211857	0.208001	0.211857	0.622815	[-0.12,0.54]	chr7	49	-1	4411	1893	92	2426	EIF2AK1	TGA	TGAA
75	ENST00000199814.9	0.125039	0.183108	0.0570638	0.706387	0.213721	0.27179	0.0592537	0.732121	0.0592537	0.732121	0.928742	[-0.28,0.4]	chr5	585	-1	2299	1263	77	959	RBM22	TAG	TAGC
76	ENST00000200135.8	0.0228908	0.124247	0.100493	0.56373	0.339599	0.440955	0.102449	0.618082	0.102449	0.618082	0.89164	[-0.3,0.51]	chr11	952	-1	2873	2340	26	507	ZW10	TAG	TAGC
77	ENST00000200457.9	0.14088	-0.119454	-0.261371	0.0986533	0.903608	0.643274	-0.259544	0.117783	-0.259544	0.117783	0.486766	[-0.58,0.07]	chr7	486	1	1693	1431	111	151	TRIP6	TGA	TGAG
78	ENST00000202816.5	0.0876444	0.0313154	-0.0578254	0.77419	-0.490361	-0.54669	-0.0545124	0.833643	-0.0545124	0.833643	0.957664	[-0.55,0.45]	chr20	90	-1	3216	2556	108	552	ESF1	TAA	TAAC
79	ENST00000203001.7	0.153196	-0.0937591	-0.24884	0.224799	0.176557	-0.0703986	-0.245667	0.309701	-0.245667	0.309701	0.717767	[-0.71,0.23]	chr20	72	-1	2929	1494	128	1307	TRMT6	TAA	TAAC
80	ENST00000203166.10	0.0733689	-0.33129	-0.406939	0.0755129	0.117619	-0.28704	-0.403534	0.138961	-0.403534	0.138961	0.525672	[-0.93,0.13]	chr19	619	1	4324	1902	60	2362	HAUS5	TGA	TGAA
81	ENST00000203407.6	-0.0909772	-0.116911	-0.0262686	0.797392	0.969553	0.943619	-0.0257175	0.802278	-0.0257175	0.802278	0.951015	[-0.23,0.18]	chr3	265	-1	1595	1443	26	126	UQCRC1	TAG	TAGG
82	ENST00000204517.11	-0.201995	0.0921331	0.291736	0.233892	0.390506	0.684634	0.296162	0.267492	0.296162	0.267492	0.686604	[-0.23,0.83]	chr16	152	-1	2163	1017	277	869	TFAP4	TGA	TGAC
83	ENST00000205061.9	-0.00801607	-0.0826985	-0.0753373	0.576442	0.993524	0.918841	-0.0743427	0.596923	-0.0743427	0.596923	0.884714	[-0.35,0.2]	chr16	646	-1	8261	3612	20	4629	GLG1	TGA	TGAC
84	ENST00000205402.10	-0.0107724	-0.354785	-0.344778	0.00299825	0.656016	0.312003	-0.343601	0.00482898	-0.343601	0.00482898	0.0750775	[-0.58,-0.1]	chr7	553	1	3537	1530	68	1939	DLD	TGA	TGAA
85	ENST00000205636.4	-0.0163007	0.0623556	0.0779364	0.627456	-1.74959	-1.67093	0.0802508	0.716557	0.0802508	0.716557	0.924132	[-0.36,0.52]	chr3	127	-1	3307	552	107	2648	CMTM6	TAA	TAAA
86	ENST00000206380.8	0.0642067	0.0996282	0.0332523	0.891143	0.447365	0.482787	0.0378257	0.886913	0.0332523	0.891143	0.976941	[-0.44,0.5]	chr17	621	-1	1525	774	11	740	TMEM101	TGA	TGAG
87	ENST00000206451.11	-0.125001	-0.470904	-0.347732	0.084802	1.30133	0.95543	-0.345069	0.0870396	-0.345069	0.0870396	0.420356	[-0.74,0.05]	chr14	100	1	965	750	69	146	PSME1	TGA	TGAG
88	ENST00000206542.9	-0.15369	0.0396248	0.19187	0.388521	-0.299887	-0.106572	0.195841	0.474222	0.195841	0.474222	0.828016	[-0.34,0.74]	chr14	21	-1	1976	1008	129	839	OSGEP	TAA	TAAT
89	ENST00000206595.11	0.0317168	-0.207795	-0.240548	0.191873	-0.727092	-0.966604	-0.238422	0.314178	-0.238422	0.314178	0.720364	[-0.7,0.23]	chr14	132	1	5770	2121	119	3530	G2E3	TAA	TAAA
90	ENST00000209873.9	0.00820255	-0.213515	-0.222828	0.141052	1.1398	0.918079	-0.221309	0.151184	-0.221309	0.151184	0.548793	[-0.52,0.08]	chr12	414	-1	1815	1641	145	29	AAAS	TAA	TAAG
91	ENST00000210060.12	-0.109564	0.0131707	0.120914	0.567498	0.800718	0.923453	0.123983	0.569171	0.123983	0.569171	0.877068	[-0.3,0.56]	chr19	338	-1	1345	1110	114	121	DHPS	TGA	TGAG
92	ENST00000210444.6	0.112663	-0.15831	-0.272046	0.0617026	0.728689	0.457716	-0.270211	0.0877271	-0.270211	0.0877271	0.421781	[-0.58,0.04]	chr9	343	1	1179	1080	77	22	NANS	TAA	TAAA
93	ENST00000211998.9	0.0562382	0.048802	-0.00812089	0.948267	0.387927	0.380491	-0.00673629	0.963956	-0.00673629	0.963956	0.998889	[-0.29,0.28]	chr10	317	1	5490	3405	94	1991	VCL	TAG	TAGG
94	ENST00000212015.11	-0.014591	0.0626485	0.0761207	0.67589	-0.447371	-0.370132	0.0786387	0.724951	0.0786387	0.724951	0.926603	[-0.36,0.53]	chr10	242	1	4107	2244	66	1797	SIRT1	TAG	TAGT
95	ENST00000215565.3	0.074018	0.187911	0.112732	0.523803	1.15435	1.26824	0.114771	0.471239	0.112732	0.523803	0.854338	[-0.23,0.45]	chr19	392	-1	535	414	66	55	NDUFB7	TAG	TAGG
96	ENST00000215567.10	-0.218852	-0.287803	-0.0696481	0.634681	1.76865	1.6997	-0.0685748	0.580064	-0.0696481	0.634681	0.896746	[-0.37,0.22]	chr19	391	1	1139	927	103	109	TECR	TGA	TGAG
97	ENST00000215570.8	-0.0837286	-0.0932391	-0.0102334	0.934326	0.636321	0.626811	-0.00898753	0.949073	-0.00898753	0.949073	0.995734	[-0.28,0.27]	chr19	80	-1	1664	288	53	1323	TIMM13	TGA	TGAC
98	ENST00000215574.9	0.0182669	0.944941	0.925815	7.10352e-07	-0.889227	0.037447	0.929719	0.000128728	0.929719	0.000128728	0.00488875	[0.45,1.42]	chr19	7	1	1418	711	172	535	CDC34	TGA	TGAC
99	ENST00000215730.12	-0.126274	0.228361	0.353128	0.0878568	-0.510603	-0.155967	0.357166	0.174348	0.357166	0.174348	0.575469	[-0.16,0.88]	chr22	48	1	4259	777	104	3378	SNAP29	TGA	TGAA
100	ENST00000215754.8	0.13405	-0.243344	-0.377369	0.0117489	2.81671	2.43932	-0.37735	1.35895e-10	-0.377369	0.0117489	0.13697	[-0.7,-0.08]	chr22	90	1	557	348	92	117	MIF	TAA	TAAG
101	ENST00000215770.6	0.144484	-0.183956	-0.330399	0.160783	2.76939	2.44095	-0.327831	0.0621212	-0.330399	0.160783	0.556632	[-0.82,0.13]	chr22	92	1	1582	405	27	1150	DDTL	TGA	TGAG
102	ENST00000215793.13	-0.101062	-0.0941879	0.00625712	0.958568	0.808142	0.815016	0.00722134	0.945751	0.00625712	0.958568	0.998041	[-0.22,0.23]	chr22	151	-1	5090	2382	102	2606	SF3A1	TAG	TAGA
103	ENST00000215882.10	-0.0110647	-0.0155164	-0.00512764	0.968206	0.326279	0.321828	-0.00360481	0.982192	-0.00360481	0.982192	0.999997	[-0.32,0.31]	chr22	22	-1	1548	936	63	549	SLC25A1	TAA	TAAG
104	ENST00000215956.10	0.0528515	0.0253309	-0.0278545	0.799745	1.09336	1.06583	-0.027191	0.809266	-0.027191	0.809266	0.951731	[-0.25,0.19]	chr22	294	-1	877	387	264	226	SNU13	TAA	TAAA
105	ENST00000215957.10	-0.0330765	0.251426	0.283278	0.151237	-1.36067	-1.07617	0.287292	0.284541	0.287292	0.284541	0.702826	[-0.24,0.82]	chr22	235	1	4710	2592	126	1992	MICALL1	TAA	TAAC
106	ENST00000215980.10	0.0226181	-0.132002	-0.156582	0.452809	1.17898	1.02436	-0.153609	0.468113	-0.153609	0.468113	0.825994	[-0.56,0.26]	chr22	300	-1	938	543	76	319	CENPM	TGA	TGAG
107	ENST00000216034.6	-0.0519884	-0.227563	-0.176172	0.173926	-0.462203	-0.637778	-0.17521	0.253874	-0.17521	0.253874	0.667755	[-0.47,0.13]	chr22	251	1	2031	429	22	1580	TOMM22	TAG	TAGA
108	ENST00000216038.6	0.077074	-0.310088	-0.387733	0.000335871	0.65491	0.267748	-0.386897	0.000773022	-0.386897	0.000773022	0.0214097	[-0.61,-0.16]	chr22	183	-1	2019	1518	91	410	RTCB	TAG	TAGA
109	ENST00000216044.10	0.0639838	0.00746852	-0.0578535	0.721875	-0.178941	-0.235456	-0.0552663	0.77538	-0.0552663	0.77538	0.94377	[-0.43,0.32]	chr22	253	1	4905	2010	12	2883	GTPBP1	TGA	TGAA
110	ENST00000216106.6	-0.295724	-0.182495	0.11118	0.617559	-0.894404	-0.781175	0.114808	0.684218	0.114808	0.684218	0.919091	[-0.44,0.68]	chr22	190	1	4095	1806	133	2156	HMGXB4	TGA	TGAC
111	ENST00000216117.9	0.0342855	-0.131027	-0.168239	0.504998	0.726922	0.561609	-0.163493	0.557888	-0.163493	0.557888	0.871953	[-0.7,0.38]	chr22	192	1	1554	867	78	609	HMOX1	TGA	TGAA
112	ENST00000216121.11	-0.0315486	-0.0163695	0.0143452	0.91937	-0.435222	-0.420043	0.0160623	0.924285	0.0160623	0.924285	0.987162	[-0.33,0.36]	chr22	139	-1	2237	855	255	1127	NIPSNAP1	TGA	TGAT
113	ENST00000216122.9	-0.0867019	-0.307636	-0.221491	0.0400717	0.961182	0.740248	-0.220811	0.0386985	-0.221491	0.0400717	0.284532	[-0.44,-0.01]	chr22	193	1	3458	2205	77	1176	MCM5	TGA	TGAG
114	ENST00000216129.7	-0.0416255	0.258664	0.29963	0.0121023	-0.108528	0.191761	0.300758	0.0198432	0.300758	0.0198432	0.192779	[0.05,0.56]	chr22	320	-1	3386	1935	65	1386	TTLL12	TAG	TAGG
115	ENST00000216146.9	-0.104339	0.231758	0.335946	1.10057e-05	-1.05537	-0.719275	0.336334	8.74589e-06	0.335946	1.10057e-05	0.000681133	[0.19,0.48]	chr22	263	-1	1296	1212	26	58	RPL3	TAA	TAAT
116	ENST00000216181.10	-0.194663	-0.32588	-0.131636	0.202126	0.957656	0.826439	-0.131083	0.173722	-0.131636	0.202126	0.610853	[-0.34,0.07]	chr22	202	-1	7554	5883	280	1391	MYH9	TAA	TAAG
117	ENST00000216218.8	0.000639188	-0.102166	-0.10335	0.346274	-1.5475	-1.65031	-0.102403	0.469667	-0.102403	0.469667	0.827598	[-0.38,0.18]	chr22	276	-1	3212	1110	99	2003	ST13	TAA	TAAT
118	ENST00000216225.8	0.0503003	-0.416498	-0.467526	0.000237347	1.17825	0.711454	-0.466507	0.000321646	-0.466507	0.000321646	0.010608	[-0.72,-0.21]	chr22	279	1	1188	327	40	821	RBX1	TAG	TAGG
119	ENST00000216237.10	0.13179	-0.104344	-0.237247	0.152192	-0.360813	-0.596946	-0.23506	0.258566	-0.23506	0.258566	0.67382	[-0.64,0.17]	chr22	281	1	3189	2118	51	1020	L3MBTL2	TGA	TGAG
120	ENST00000216252.4	-0.0489187	-0.295673	-0.248035	0.145008	-0.306052	-0.552806	-0.245755	0.239311	-0.245755	0.239311	0.651992	[-0.65,0.16]	chr22	287	-1	1053	333	39	681	PHF5A	TGA	TGAT
121	ENST00000216254.9	-0.316471	-0.443732	-0.128405	0.402607	0.415882	0.288621	-0.12674	0.455575	-0.12674	0.455575	0.820612	[-0.46,0.21]	chr22	288	1	2734	2343	30	361	ACO2	TGA	TGAG
122	ENST00000216277.12	-0.125893	0.240433	0.365745	0.00163844	-1.5189	-1.15258	0.366966	0.00888916	0.366966	0.00888916	0.114849	[0.09,0.64]	chr14	479	1	4519	2238	220	2061	PAPOLA	TAA	TAAA
123	ENST00000216281.12	0.152494	0.037252	-0.115275	0.294024	0.816141	0.700899	-0.115227	0.0344426	-0.115275	0.294024	0.708507	[-0.34,0.1]	chr14	502	-1	3379	2199	206	974	HSP90AA1	TAA	TAAT
124	ENST00000216286.10	-0.00922001	0.0543737	0.061782	0.782895	0.834585	0.898178	0.0650233	0.773247	0.061782	0.782895	0.946497	[-0.37,0.49]	chr14	211	-1	4870	4128	65	677	NID2	TAA	TAAG
125	ENST00000216297.7	-0.0351194	-0.26208	-0.227395	0.0141208	0.174946	-0.0520144	-0.226701	0.0213207	-0.226701	0.0213207	0.202017	[-0.42,-0.03]	chr14	47	-1	4433	3144	92	1197	SUPT16H	TAA	TAAC
126	ENST00000216330.7	0.0932872	-0.0956986	-0.189391	0.0990673	0.632864	0.443878	-0.188554	0.130863	-0.188554	0.130863	0.512514	[-0.43,0.06]	chr14	181	-1	1684	675	411	598	FKBP3	TGA	TGAA
127	ENST00000216367.10	0.153522	0.217417	0.0622946	0.784357	0.298128	0.362022	0.0665848	0.804872	0.0665848	0.804872	0.951242	[-0.47,0.61]	chr14	190	-1	1692	1584	11	97	POLE2	TGA	TGAG
128	ENST00000216416.9	-0.0991021	0.414142	0.51261	9.86929e-05	-0.522247	-0.00900281	0.514207	0.00143858	0.514207	0.00143858	0.033387	[0.2,0.83]	chr14	224	-1	4735	435	47	4253	CNIH1	TAG	TAGA
129	ENST00000216442.12	0.0942199	0.268918	0.173685	0.309737	-0.280367	-0.105669	0.176122	0.403865	0.176122	0.403865	0.793328	[-0.24,0.6]	chr14	298	-1	1599	744	106	749	ATP6V1D	TAA	TAAT
130	ENST00000216455.9	0.0296497	-0.280523	-0.310617	0.00389287	1.00126	0.691091	-0.310037	0.00413452	-0.310037	0.00413452	0.0684037	[-0.52,-0.1]	chr14	247	1	955	768	78	109	PSMA3	TAA	TAAC
131	ENST00000216479.8	-0.111273	-0.0505524	0.0603673	0.554477	0.15359	0.214311	0.061032	0.580717	0.061032	0.580717	0.880195	[-0.16,0.28]	chr14	397	1	1337	1017	97	223	AHSA1	TAG	TAGG
132	ENST00000216484.6	-0.152211	-0.0578854	0.0930419	0.590846	-0.833199	-0.738873	0.0957829	0.667337	0.0957829	0.667337	0.913944	[-0.34,0.54]	chr14	399	-1	8170	1689	194	6287	SPTLC2	TGA	TGAG
133	ENST00000216500.9	0.0142521	0.0390044	0.0233459	0.903298	0.733955	0.758707	0.0259012	0.892795	0.0233459	0.903298	0.981502	[-0.34,0.39]	chr14	261	-1	2322	1020	456	846	DHRS7	TGA	TGAA
134	ENST00000216639.8	0.181744	-0.135228	-0.317966	0.0312709	0.367037	0.0500655	-0.316131	0.0627748	-0.316131	0.0627748	0.362546	[-0.65,0.02]	chr14	480	1	1663	1191	71	401	VRK1	TAA	TAAT
135	ENST00000216756.11	-0.0229776	-0.428349	-0.407551	0.0710527	0.5346	0.129229	-0.404094	0.112041	-0.404094	0.112041	0.473976	[-0.9,0.09]	chr14	506	-1	953	639	39	275	CINP	TGA	TGAC
136	ENST00000216774.11	0.0792653	-0.07025	-0.150408	0.297443	0.794374	0.644859	-0.149068	0.323591	-0.149068	0.323591	0.728688	[-0.44,0.15]	chr14	149	1	2187	1515	257	415	SRP54	TAA	TAAA
137	ENST00000216780.8	-0.410327	-0.420666	-0.013222	0.9523	1.13253	1.12219	-0.00897537	0.974976	-0.00897537	0.974976	0.999997	[-0.54,0.53]	chr14	97	1	2357	1923	268	166	PCK2	TGA	TGAC
138	ENST00000216802.10	0.155268	-0.408295	-0.565467	0.00551532	1.01107	0.447511	-0.562885	0.0104276	-0.562885	0.0104276	0.12596	[-0.99,-0.13]	chr14	102	-1	793	720	29	44	PSME2	TGA	TGAA
139	ENST00000216807.12	-0.0793646	0.0622073	0.139047	0.562168	-0.335625	-0.194054	0.143909	0.623369	0.143909	0.623369	0.894632	[-0.44,0.73]	chr14	157	1	2637	972	179	1486	BRMS1L	TAA	TAAT
140	ENST00000216832.9	-0.0972063	-0.0388547	0.0575028	0.649695	-0.931262	-0.87291	0.0587979	0.695271	0.0587979	0.695271	0.920449	[-0.24,0.36]	chr14	172	1	3537	2154	26	1357	PNN	TAA	TAAT
141	ENST00000216840.10	-0.154143	0.0276766	0.179347	0.519681	0.595003	0.776822	0.184564	0.539347	0.184564	0.539347	0.862989	[-0.41,0.79]	chr14	113	-1	2088	1704	307	77	RABGGTA	TAA	TAAG
142	ENST00000216879.8	-0.0441759	0.153706	0.196481	0.307451	0.352656	0.550538	0.199435	0.357668	0.199435	0.357668	0.759741	[-0.23,0.63]	chr20	23	-1	3568	1113	868	1587	NSFL1C	TAA	TAAC
143	ENST00000216962.9	-0.0272435	-0.0230616	0.00294322	0.989417	0.433147	0.437329	0.00506511	0.975388	0.00294322	0.989417	0.999997	[-0.35,0.35]	chr20	150	1	4116	2532	94	1490	PYGB	TAG	TAGG
[truncated: 4,870 more rows]

## Sheet: Untr vs G418 - 0.5 mg|mL 10min
	tr_id	mRNA_log2FC	RPF_log2FC	log2FC_TE_v1	pvalue_v1	control_log2TE	g418_10min_log2TE	log2FC_TE_v2	pvalue_v2	log2FC_TE_final	pvalue_final	pvalue.adjust	CI(95%)	chrom	featnum	strand	mrna_len	cds_len	X5utr_len	X3utr_len	gene_name	stopcodon	stop4nt
[truncated: 4,283 more rows]
