# Supplementary material for: Stop codon context influences genome-wide stimulation of termination codon readthrough by aminoglycosides
Source: eLife. 2020 Jan 23;9:e52611. doi: 10.7554/eLife.52611 (PMC7089771; doi:10.7554/eLife.52611)
Supplement: Supplementary file 3. [file elife-52611-supp3.xlsx]

## Sheet: Sheet1
Statistical test results										pvalue conventions
										> 0.05	ns
Figure	Subfigure	Drug	Comparison	Variable	Test	test statistic	p value			<= 0.05	*
4	B	Untr	Untr: UAA to UAG	RRTS	Mann Whitney U	1.04374e+06	0.00162195	**		<=0.01	**
			Untr: UAA to UGA	RRTS	Mann Whitney U	2.15887e+06	0.0584799	ns		<=0.001	***
			Untr: UAG to UGA	RRTS	Mann Whitney U	1.48111e+06	4.84352e-07	****		<=0.0001	****
		G418	G418: UAA to UAG	RRTS	Mann Whitney U	859780	1.1427e-12	h
			G418: UAA to UGA	RRTS	Mann Whitney U	1592894	2.13892e-70	****
			G418: UAG to UGA	RRTS	Mann Whitney U	1.39465e+06	1.93596e-21	****
		Untr	Untr - UAA to UAG	RRTS	Weltch t Test	-2.97698	0.00292774	**
			Untr- UAA to UGA	RRTS	Weltch t Test	1.72773	0.0841503	ns
			Untr: UAG to UGA	RRTS	Weltch t Test	-4.59029	4.5909e-06	****
		G418	G418: UAA to UAG	RRTS	Weltch t Test	-3.91604	9.21831e-05	****
			G418: UAA to UGA	RRTS	Weltch t Test	-14.5443	9.13171e-47	****
			G418: UAG to UGA	RRTS	Weltch t Test	-10.2449	2.94526e-24	****
4-S1	B	Untr	Untr: UAAC to UAAA	RRTS	Mann Whitney U - onesided	97265	0.553552	ns
			Untr: UAAC to UAAG	RRTS	Mann Whitney U - onesided	61134.5	0.35773	ns
			Untr: UAAC to UAAU	RRTS	Mann Whitney U - onesided	46693.5	0.236304	ns
		Untr	Untr: UAGC to UAGA	RRTS	Mann Whitney U - onesided	59225.5	0.490236	ns
			Untr: UAGC to UAGG	RRTS	Mann Whitney U - onesided	62243	0.0358946	*
			Untr: UAAC to UAAU	RRTS	Mann Whitney U - onesided	30745.5	0.305863	ns
		Untr	Untr: UGAC to UGAA	RRTS	Mann Whitney U - onesided	249111	2.38469e-11	****
			Untr: UGAC to UGAG	RRTS	Mann Whitney U - onesided	359319	2.82984e-26	****
			Untr: UGAC to UGAU	RRTS	Mann Whitney U - onesided	124739	3.1326e-10	****
4	D	G418	UAAC to UAAA	RRTS	Mann Whitney U - onesided	135138	1.64995e-16	****
			UAAC to UAAG	RRTS	Mann Whitney U - onesided	84477.5	1.62342e-15	****
			UAAC to UAAU	RRTS	Mann Whitney U - onesided	59282.5	4.74564e-07	****
		G418	UAGC to UAGA	RRTS	Mann Whitney U - onesided	73544	2.0804e-07	****
			UAGC to UAGG	RRTS	Mann Whitney U - onesided	77816	7.56888e-10	****
			UAAC to UAAU	RRTS	Mann Whitney U - onesided	36126	0.00233932	**
		G418	UGAC to UGAA	RRTS	Mann Whitney U - onesided	269518	1.29031e-11	****
			UGAC to UGAG	RRTS	Mann Whitney U - onesided	420646	7.86813e-38	****
			UGAC to UGAU	RRTS	Mann Whitney U - onesided	121171	0.000222564	***
5	D	G418	3'TC to NTC	Percent downstream ribosome density	Paired t-test	-26.589	0.0239317	*
					v
